# Supplementary material for: Is mammalian chromosomal evolution driven by regions of genome fragility?
Source: PubMed Central journal article supplement (PMC1794428; doi:10.1186/gb-2006-7-12-r115), 2006-12-08
Supplement: gb-2006-7-12-r115-S1.pdf [file gb-2006-7-12-r115-S1.pdf]

**Supplementary Figure 1:** Multispecies alignment of all human chromosomes. Red blocks represent the homology syntenic blocks in the seven eutherian species compared and black blocks represent the homology regions with the chicken genome (<http://www.ensembl.org>). The location of human fragile sites (FRA) is given to the left of the ideogram of each human chromosome, red for common fragile sites and blue for rare fragile sites.

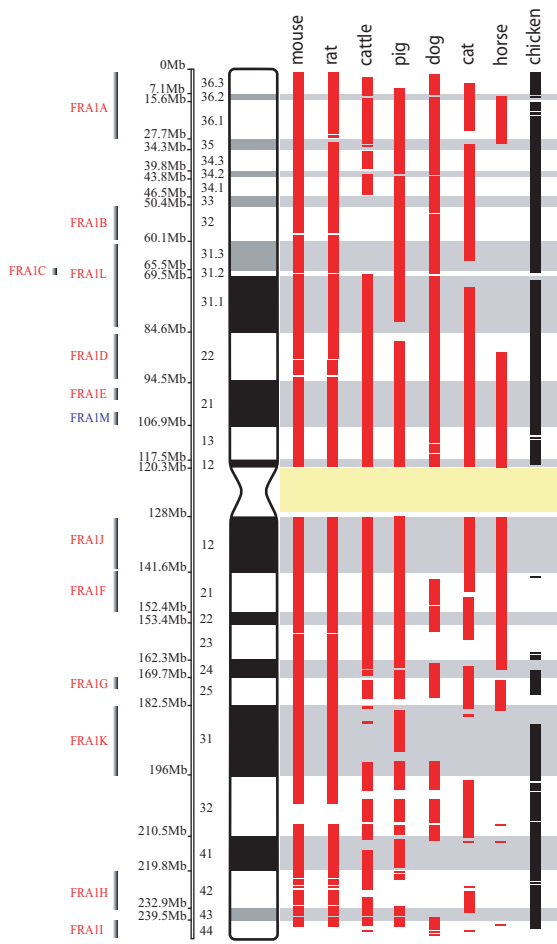

HSA 1

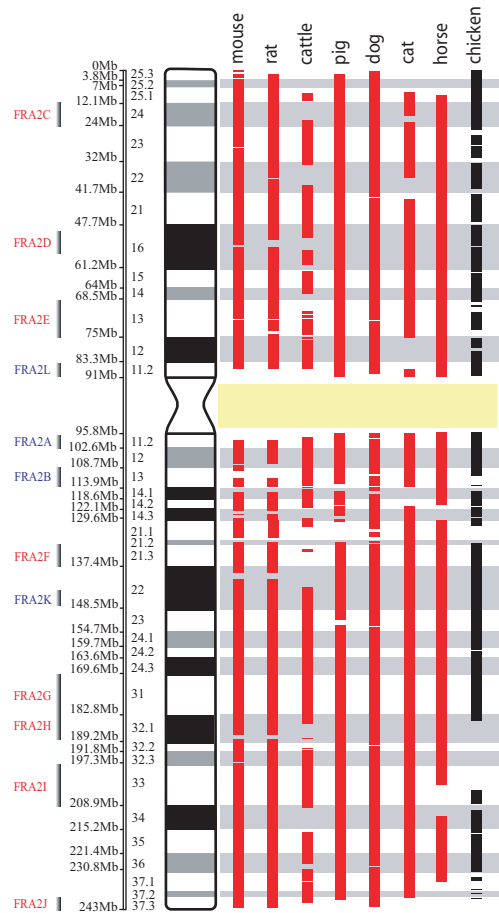

HSA 2

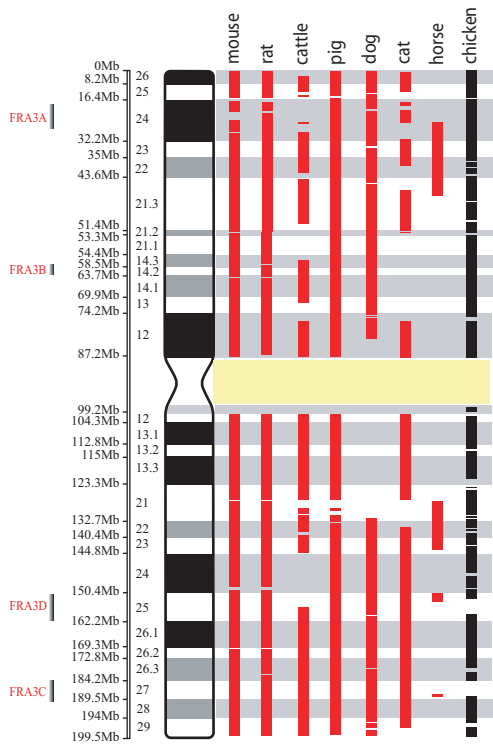

HSA 3

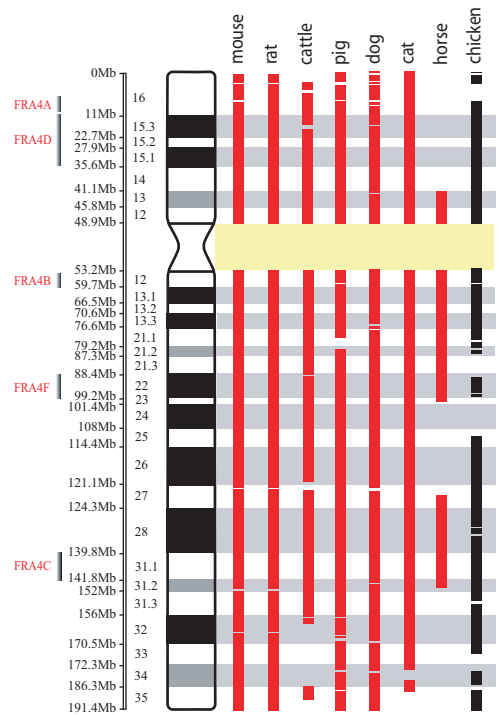

HSA 4

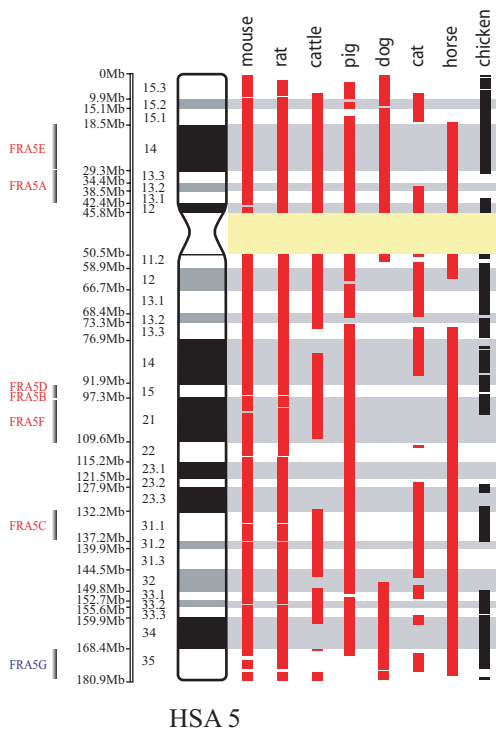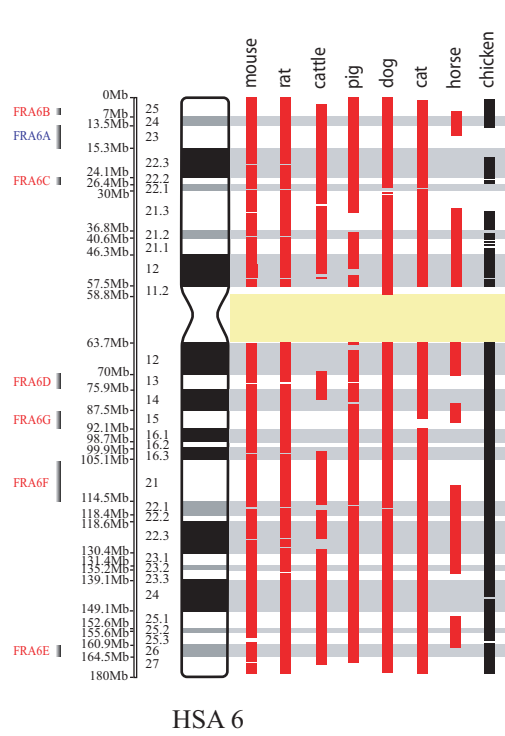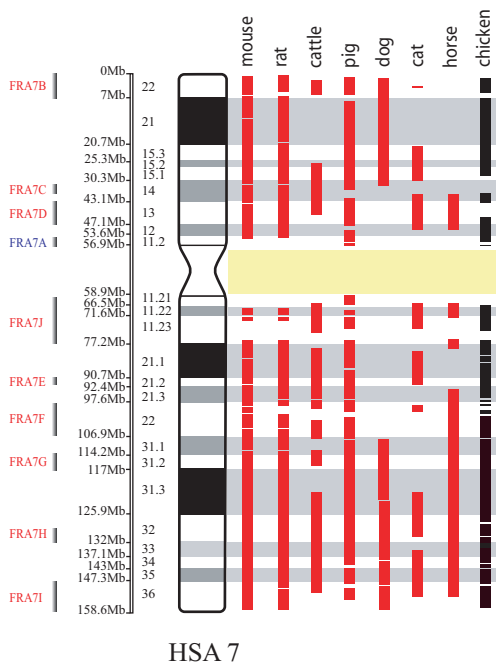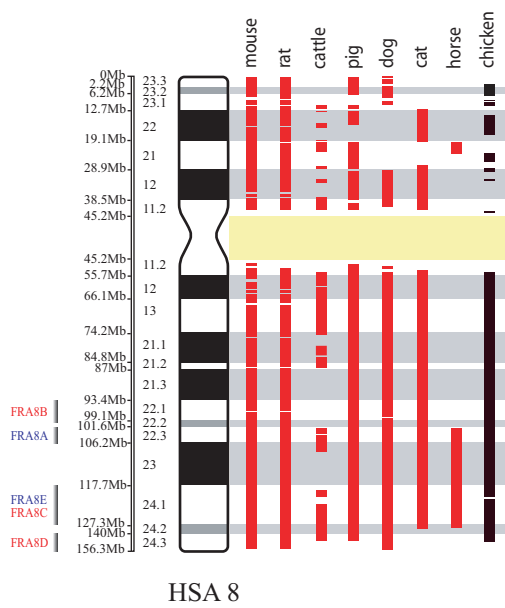

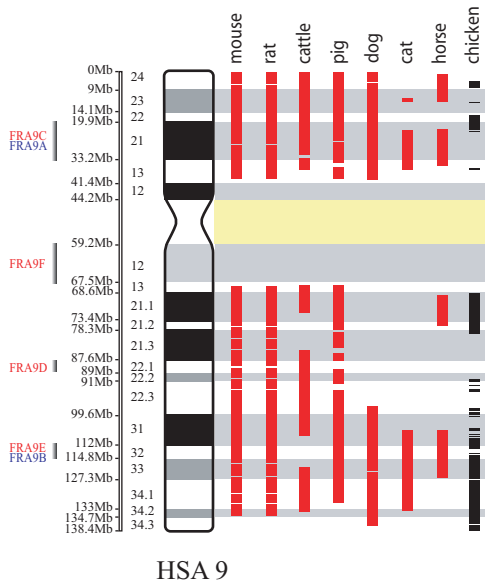

HSA 9

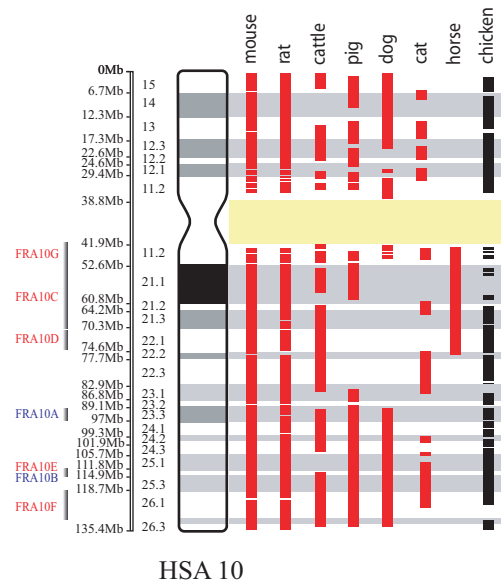

HSA 10

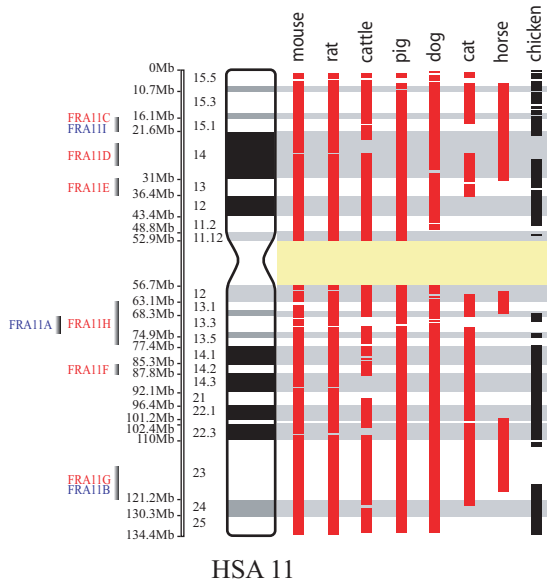

HSA 11

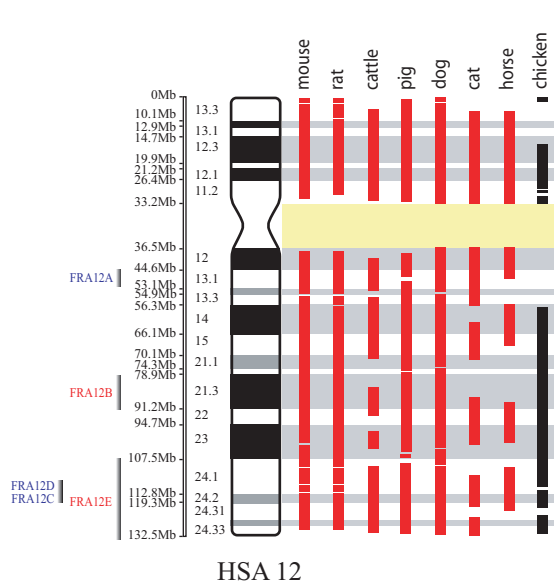

HSA 12

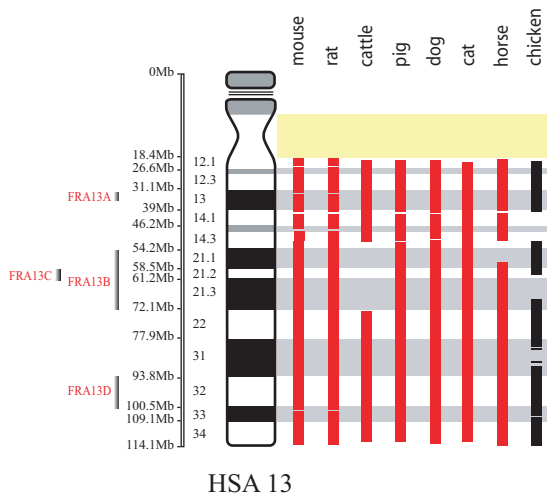

HSA 13

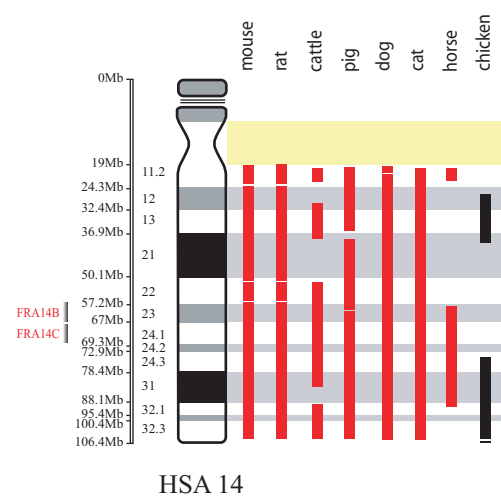

HSA 14

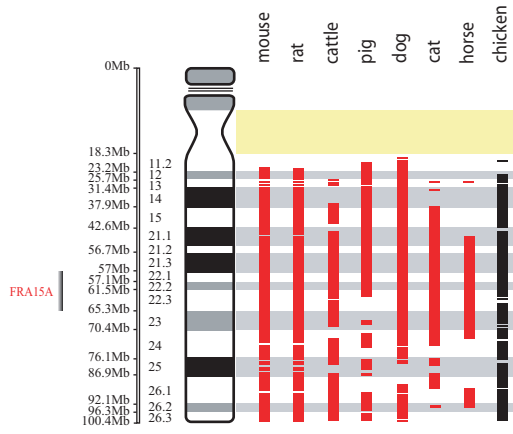

HSA 15

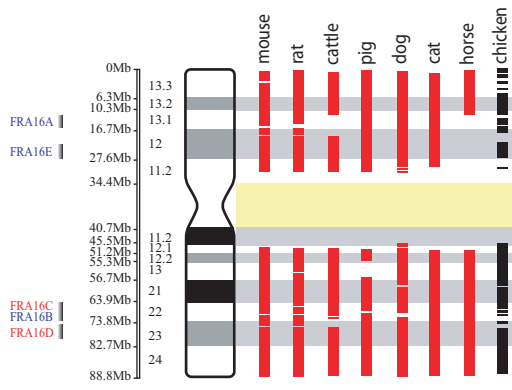

HSA 16

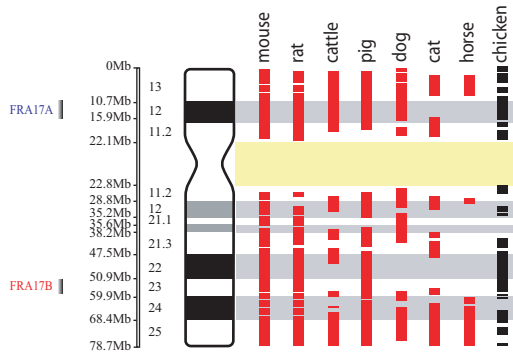

HSA 17

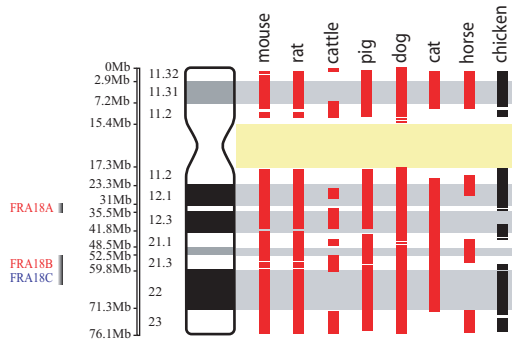

HSA 18

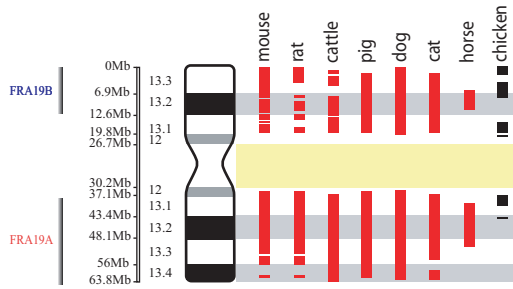

HSA 19

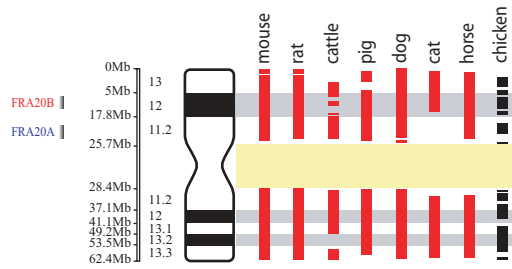

HSA 20

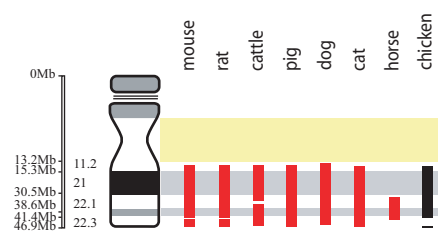

HSA 21

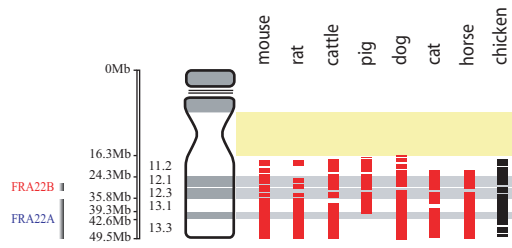

HSA 22
