# Supplementary material for: Is mammalian chromosomal evolution driven by regions of genome fragility?
Source: PubMed Central journal article supplement (PMC1794428; doi:10.1186/gb-2006-7-12-r115), 2006-12-08
Supplement: gb-2006-7-12-r115-S2.pdf [file gb-2006-7-12-r115-S2.pdf]

**Supplementary Figure 2:** Distribution of base pair implicated tandem repeats along all human chromosomes represented as windows of 250000bp each. The distribution of base pair implicated tandem repeats in the pericentromeric and subtelomeric areas has been omitted in order to clarify the presence of outlayers.

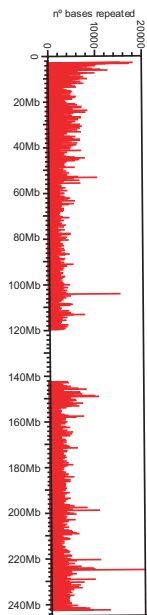

hsa1

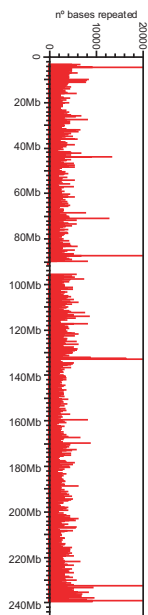

hsa2

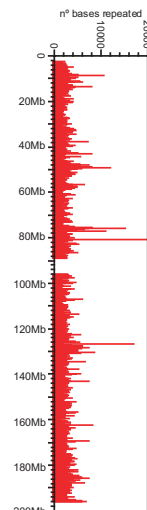

hsa3

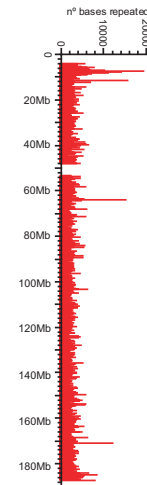

hsa4

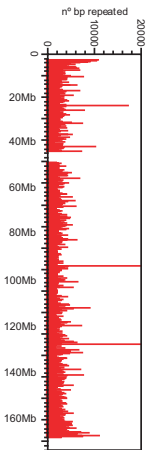

hsa5

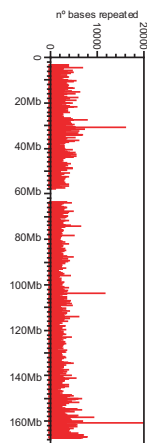

hsa6

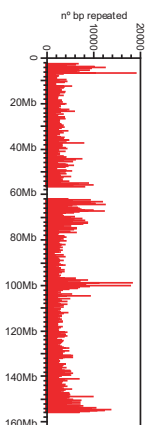

hsa7

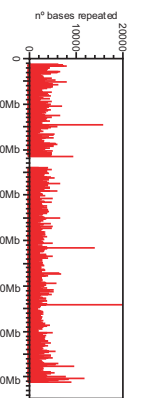

hsa8

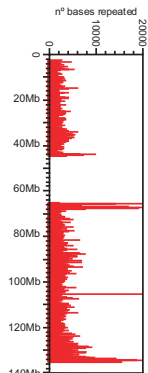

hsa9

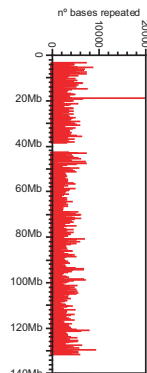

hsa10

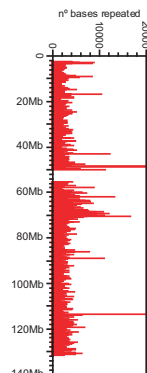

hsa11

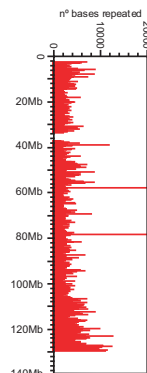

hsa12

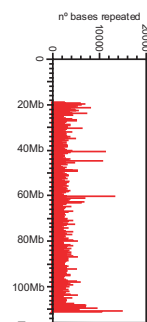

hsa13

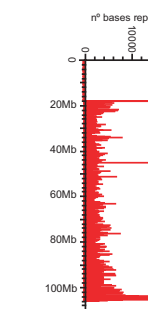

hsa14

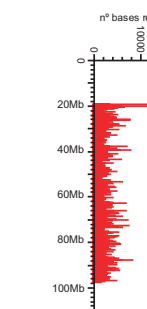

hsa15

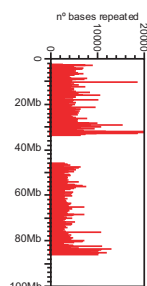

hsa16

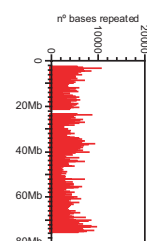

hsa17

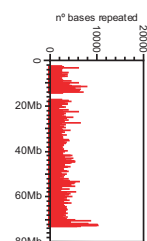

hsa18

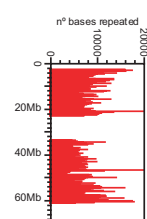

hsa19

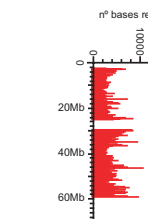

hsa20

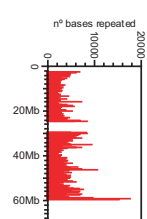

hsa21

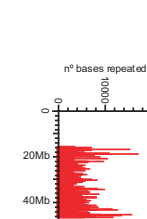

hsa22
