# Supplementary material for: Is mammalian chromosomal evolution driven by regions of genome fragility?
Source: PubMed Central journal article supplement (PMC1794428; doi:10.1186/gb-2006-7-12-r115), 2006-12-08
Supplement: gb-2006-7-12-r115-S4.pdf [file gb-2006-7-12-r115-S4.pdf]

**Table S1:** List of the homologous syntenic blocks (HSB) indicating the chromosomal position (band) and nucleotide (nt) position, the species where they have been detected and the size of each evolutionary breakpoint region (EBR).

| <b>Human chr</b> | <b>from (band)</b> | <b>from (nt position)</b> | <b>to (band)</b> | <b>to (nt position)</b> | <b>species</b> | <b>HSB's size</b> | <b>EBR's size</b> |
|------------------|--------------------|---------------------------|------------------|-------------------------|----------------|-------------------|-------------------|
| 1                | 1p36.3             | 1585750                   | 1p36.1           | 27194712                | cat            | 25608962          | 4349779           |
| 1                | 1p35               | 31544491                  | 1p31.3           | 65460889                | cat            | 33916398          | 5241871           |
| 1                | 1p31.1             | 70702760                  | 1q21             | 144725443               | cat            | 74022683          | 6013100           |
| 1                | 1q21               | 150738543                 | 1q23             | 161580755               | cat            | 10842212          | 2515146           |
| 1                | 1q24               | 164095901                 | 1q31             | 182950099               | cat            | 18854198          | 3388849           |
| 1                | 1q31               | 186338948                 | 1q31             | 186348198               | cat            | 9250              | 11446400          |
| 1                | 1q32               | 197794598                 | 1q41             | 210818867               | cat            | 13024269          | 4304261           |
| 1                | 1q41               | 215123128                 | 1q41             | 215219029               | cat            | 95901             | 9494297           |
| 1                | 1q42               | 224713326                 | 1q42             | 224722192               | cat            | 8866              | 970791            |
| 1                | 1q42               | 225692983                 | 1q43             | 236369302               | cat            | 10676319          | 8745705           |
| 1                | 1q44               | 245115007                 | 1q44             | 245124084               | cat            | 9077              |                   |
| 2                | 2p25.1             | 9729021                   | 2p24             | 16125926                | cat            | 6396905           | 5056086           |
| 2                | 2p24               | 21182012                  | 2p22             | 35873540                | cat            | 14691528          | 3192735           |
| 2                | 2p22               | 39066275                  | 2p22             | 39067575                | cat            | 1300              | 4340841           |
| 2                | 2p21               | 43408416                  | 2p12             | 75076821                | cat            | 31668405          | 11892752          |
| 2                | 2p11.2             | 86969573                  | 2q13             | 113448884               | cat            | 26479311          | 6869832           |
| 2                | 2q14.2             | 120318716                 | 2q37.3           | 241838347               | cat            | 121519631         |                   |
| 3                | 3p26               | 1451745                   | 3p25             | 13166476                | cat            | 11714731          | 3453681           |
| 3                | 3p24               | 16620157                  | 3p24             | 17806005                | cat            | 1185848           | 1556165           |
| 3                | 3p24               | 19362170                  | 3p24             | 25489220                | cat            | 6127050           | 5008588           |
| 3                | 3p24               | 30497808                  | 3p22             | 38951627                | cat            | 8453819           | 6804014           |
| 3                | 3p21.3             | 45755641                  | 3p21.2           | 51753995                | cat            | 5998354           | 1296085           |
| 3                | 3p21.2             | 53050080                  | 3p21.2           | 53081586                | cat            | 31506             | 23684218          |
| 3                | 3p12               | 76765804                  | 3q21             | 123699021               | cat            | 46933217          | 6830072           |
| 3                | 3q21               | 130529093                 | 3q21             | 130535798               | cat            | 6705              | 4210912           |
| 3                | 3q22               | 134746710                 | 3q29             | 197215954               | cat            | 62469244          |                   |
| 4                | 4p16               | 657750                    | 4q34             | 175316794               | cat            | 174659044         | 7211134           |
| 4                | 4q34               | 182527928                 | 4q35             | 186652876               | cat            | 4124948           |                   |
| 5                | 5p15.3             | 6632091                   | 5p15.1           | 17309480                | cat            | 10677389          | 18547653          |
| 5                | 5p13.2             | 35857133                  | 5q11.2           | 52508337                | cat            | 16651204          | 2182710           |
| 5                | 5q11.2             | 54691047                  | 5q13.2           | 70405708                | cat            | 15714661          | 3614016           |
| 5                | 5q13.3             | 74019724                  | 5q14             | 88105156                | cat            | 14085432          | 22485354          |
| 5                | 5q22               | 110590510                 | 5q22             | 111490607               | cat            | 900097            | 12608190          |
| 5                | 5q23.2             | 124098797                 | 5q32             | 145444492               | cat            | 21345695          | 2746505           |
| 5                | 5q32               | 148190997                 | 5q33.1           | 151050039               | cat            | 2859042           | 7627295           |
| 5                | 5q33.3             | 158677334                 | 5q34             | 162035708               | cat            | 3358374           | 9024340           |
| 5                | 5q35               | 171060048                 | 5q35             | 176460698               | cat            | 5400650           | 4265267           |
| 5                | 5q35               | 180725965                 | 5q35             | 180732931               | cat            | 6966              |                   |
| 6                | 6p25               | 282097                    | 6p22.1           | 28564483                | cat            | 28282386          | 1362383           |
| 6                | 6p22.1             | 29926866                  | 6q15             | 88825718                | cat            | 58898852          | 3313092           |
| 6                | 6q16.1             | 92138810                  | 6q27             | 170557420               | cat            | 78418610          |                   |
| 7                | 7p22               | 4840400                   | 7p22             | 4840520                 | cat            | 120               | 17634548          |
| 7                | 7p15.3             | 22475068                  | 7p14             | 30980430                | cat            | 8505362           | 7005766           |
| 7                | 7p14               | 37986196                  | 7p12             | 50340856                | cat            | 12354660          | 14482633          |
| 7                | 7q11.21            | 64823489                  | 7q11.23          | 75669671                | cat            | 10846182          | 5256903           |
| 7                | 7q21.1             | 80926574                  | 7q21.3           | 92802263                | cat            | 11875689          | 6485422           |
| 7                | 7q22               | 99287685                  | 7q22             | 101473628               | cat            | 2185943           | 2408800           |
| 7                | 7q22               | 103882428                 | 7q22             | 103884909               | cat            | 2481              | 16898382          |
| 7                | 7q31.3             | 120783291                 | 7q32             | 131601627               | cat            | 10818336          | 4500197           |
| 7                | 7q33               | 136101824                 | 7q36             | 154560138               | cat            | 18458314          |                   |
| 8                | 8p23.1             | 12616348                  | 8p21             | 19634073                | cat            | 7017725           | 7641715           |

|    |          |           |          |           |     |          |          |
|----|----------|-----------|----------|-----------|-----|----------|----------|
| 8  | 8p21     | 27275788  | 8p11.2   | 42016234  | cat | 14740446 | 11241970 |
| 8  | 8q11.2   | 53258204  | 8q24.2   | 134539163 | cat | 81280959 |          |
| 9  | 9p23     | 11905550  | 9p23     | 12700223  | cat | 794673   | 8366883  |
| 9  | 9p21     | 21067106  | 9p13     | 35747923  | cat | 14680817 | 70715622 |
| 9  | 9q31     | 106463545 | 9q34.2   | 133317257 | cat | 26853712 |          |
| 10 | 10p15    | 5940612   | 10p14    | 8267092   | cat | 2326480  | 5146913  |
| 10 | 10p13    | 13414005  | 10p12.3  | 17429831  | cat | 4015826  | 1150014  |
| 10 | 10p12.3  | 18579845  | 10p12.2  | 22770461  | cat | 4190616  | 8936078  |
| 10 | 10p11.2  | 31706539  | 10p11.2  | 35651317  | cat | 3944778  | 7696391  |
| 10 | 10q11.2  | 43347708  | 10q11.2  | 50765558  | cat | 7417850  | 9399669  |
| 10 | 10q21.1  | 60165227  | 10q21.3  | 65674798  | cat | 5509571  | 8835377  |
| 10 | 10q22.1  | 74510175  | 10q23.1  | 86044527  | cat | 11534352 | 13621564 |
| 10 | 10q24.2  | 99666091  | 10q24.3  | 102403107 | cat | 2737016  | 2315845  |
| 10 | 10q24.3  | 104718952 | 10q24.3  | 106017367 | cat | 1298415  | 2639739  |
| 10 | 10q25.1  | 108657106 | 10q26.1  | 126717000 | cat | 18059894 |          |
| 11 | 11p15.5  | 181724    | 11p15.5  | 2829324   | cat | 2647600  | 2376409  |
| 11 | 11p15.4  | 5205733   | 11p15.1  | 18468547  | cat | 13262814 | 8272110  |
| 11 | 11p14    | 26740657  | 11p13    | 32496231  | cat | 5755574  | 394324   |
| 11 | 11p13    | 32890555  | 11p12    | 36658940  | cat | 3768385  | 24600613 |
| 11 | 11q12    | 61259553  | 11q13.3  | 68958076  | cat | 7698523  | 3431547  |
| 11 | 11q13.4  | 72389623  | 11q22.1  | 101035333 | cat | 28645710 | 1389980  |
| 11 | 11q22.2  | 102425313 | 11q24    | 126166349 | cat | 23741036 |          |
| 12 | 12p13.3  | 5420747   | 12q14    | 56835830  | cat | 51415083 | 5303350  |
| 12 | 12q14    | 62139180  | 12q21.1  | 71496217  | cat | 9357037  | 16394251 |
| 12 | 12q21.3  | 87890468  | 12q23    | 103277571 | cat | 15387103 | 7335060  |
| 12 | 12q24.1  | 110612631 | 12q24.31 | 121223165 | cat | 10610534 | 4240113  |
| 12 | 12q24.31 | 125463278 | 12q24.33 | 133089157 | cat | 7625879  |          |
| 13 | 13q12.1  | 21693700  | 13q34    | 113064379 | cat | 91370679 |          |
| 14 | 14q11.2  | 18913418  | 14q32.3  | 104293998 | cat | 85380580 |          |
| 15 | 15q13    | 27067283  | 15q13    | 27070326  | cat | 3043     | 502114   |
| 15 | 15q13    | 27572440  | 15q13    | 27694790  | cat | 122350   | 4867752  |
| 15 | 15q14    | 32562542  | 15q14    | 32762771  | cat | 200229   | 4689652  |
| 15 | 15q14    | 37452423  | 15q24    | 74939446  | cat | 37487023 | 1192962  |
| 15 | 15q24    | 76132408  | 15q25    | 81314475  | cat | 5182067  | 2954314  |
| 15 | 15q25    | 84268789  | 15q25    | 89026239  | cat | 4757450  | 7759209  |
| 15 | 15q26.3  | 96785448  | 15q26.3  | 97094240  | cat | 308792   |          |
| 16 | 16p13.3  | 672593    | 16p11.2  | 29857874  | cat | 29185281 | 17377477 |
| 16 | 16q12.1  | 47235351  | 16q24    | 89688677  | cat | 42453326 |          |
| 17 | 17p13    | 1275985   | 17p13    | 9751740   | cat | 8475755  | 4498750  |
| 17 | 17p12    | 14250490  | 17p11.2  | 19675749  | cat | 5425259  | 7206612  |
| 17 | 17q11.2  | 26882361  | 17q12    | 32312773  | cat | 5430412  | 5769238  |
| 17 | 17q21.2  | 38082011  | 17q21.3  | 41186169  | cat | 3104158  | 1107133  |
| 17 | 17q21.3  | 42293302  | 17q22    | 48595350  | cat | 6302048  | 8169268  |
| 17 | 17q23    | 56764618  | 17q23    | 59679495  | cat | 2914877  | 2655879  |
| 17 | 17q24    | 62335374  | 17q25    | 80354230  | cat | 18018856 |          |
| 18 | 18p11.32 | 970800    | 18p11.2  | 10113453  | cat | 9142653  | 11665587 |
| 18 | 18q11.2  | 21779040  | 18q23    | 71611061  | cat | 49832021 |          |
| 19 | 19p13.3  | 104393    | 19p13.1  | 19314097  | cat | 19209704 | 2839603  |
| 19 | 19p12    | 22153700  | 19p12    | 22155800  | cat | 2100     | 12218488 |
| 19 | 19q12    | 34374288  | 19q13.3  | 55108809  | cat | 20734521 | 3952766  |
| 19 | 19q13.4  | 59061575  | 19q13.4  | 62808963  | cat | 3747388  |          |
| 20 | 20p13    | 411734    | 20p12    | 14155629  | cat | 13743895 | 19361218 |
| 20 | 20q11.2  | 33516847  | 20q13.3  | 62172325  | cat | 28655478 |          |
| 21 | 21q11.2  | 15255433  | 21q22.3  | 46941497  | cat | 31686064 |          |
| 22 | 22q11.2  | 17537649  | 22q11.2  | 17540987  | cat | 3338     | 4039613  |
| 22 | 22q11.2  | 21580600  | 22q12.3  | 30831199  | cat | 9250599  | 1857288  |
| 22 | 22q12.3  | 32688487  | 22q13.1  | 37884099  | cat | 5195612  | 2840471  |
| 22 | 22q13.2  | 40724570  | 22q13.3  | 49015920  | cat | 8291350  |          |

|   |        |           |        |           |        |           |          |
|---|--------|-----------|--------|-----------|--------|-----------|----------|
| X | Xp22.2 | 10607902  | Xq28   | 151592786 | cat    | 140984884 |          |
| 1 | 1p36.3 | 656945    | 1p36.3 | 657101    | cattle | 156       | 2225     |
| 1 | 1p36.3 | 659326    | 1p36.3 | 659491    | cattle | 165       | 526168   |
| 1 | 1p36.3 | 1185659   | 1p36.2 | 15066499  | cattle | 13880840  | 929603   |
| 1 | 1p36.1 | 15996102  | 1p35   | 32178408  | cattle | 16182306  | 650282   |
| 1 | 1p35   | 32828690  | 1p35   | 32856534  | cattle | 27844     | 2213902  |
| 1 | 1p34.3 | 35070436  | 1p34.3 | 36041724  | cattle | 971288    | 2878731  |
| 1 | 1p34.3 | 38920455  | 1p34.1 | 46148253  | cattle | 7227798   | 12457868 |
| 1 | 1p32   | 58606121  | 1q24   | 164602310 | cattle | 105996189 | 1753530  |
| 1 | 1q24   | 166355840 | 1q24   | 166559098 | cattle | 203258    | 1502853  |
| 1 | 1q24   | 168061951 | 1q24   | 168143429 | cattle | 81478     | 1883807  |
| 1 | 1q25   | 170027236 | 1q25   | 180080269 | cattle | 10053033  | 2705590  |
| 1 | 1q31   | 182785859 | 1q31   | 183169425 | cattle | 383566    | 6445208  |
| 1 | 1q31   | 189614633 | 1q31   | 189622181 | cattle | 7548      | 3971151  |
| 1 | 1q31   | 193593332 | 1q32   | 198313571 | cattle | 4720239   | 1206000  |
| 1 | 1q32   | 199519571 | 1q32   | 203961724 | cattle | 4442153   | 739303   |
| 1 | 1q32   | 204701027 | 1q41   | 211126688 | cattle | 6425661   | 6288680  |
| 1 | 1q41   | 217415368 | 1q42   | 223312565 | cattle | 5897197   | 1343338  |
| 1 | 1q42   | 224655903 | 1q42   | 224672451 | cattle | 16548     | 40875    |
| 1 | 1q42   | 224713326 | 1q42   | 224980083 | cattle | 266757    | 1696061  |
| 1 | 1q42   | 226676144 | 1q43   | 236369146 | cattle | 9693002   | 866256   |
| 1 | 1q43   | 237235402 | 1q43   | 237817065 | cattle | 581663    | 550999   |
| 1 | 1q43   | 238368064 | 1q44   | 241073844 | cattle | 2705780   | 3956391  |
| 1 | 1q44   | 245030235 | 1q44   | 245030340 | cattle | 105       |          |
| 2 | 2p25.1 | 9568707   | 2p25.1 | 10756219  | cattle | 1187512   | 9659935  |
| 2 | 2p24   | 20416154  | 2p23   | 31448970  | cattle | 11032816  | 67012    |
| 2 | 2p23   | 31515982  | 2p22   | 33582120  | cattle | 2066138   | 3804300  |
| 2 | 2p22   | 37386420  | 2p16   | 51217330  | cattle | 13830910  | 3493886  |
| 2 | 2p16   | 54711216  | 2p16   | 58344712  | cattle | 3633496   | 3027597  |
| 2 | 2p15   | 61372309  | 2p14   | 67595383  | cattle | 6223074   | 2331453  |
| 2 | 2p13   | 69926836  | 2p13   | 70274004  | cattle | 347168    | 191660   |
| 2 | 2p13   | 70465664  | 2p13   | 70466012  | cattle | 348       | 1050591  |
| 2 | 2p13   | 71516603  | 2p13   | 74400121  | cattle | 2883518   | 243030   |
| 2 | 2p13   | 74643151  | 2p13   | 74714596  | cattle | 71445     | 962556   |
| 2 | 2p12   | 75677152  | 2p12   | 75816416  | cattle | 139264    | 3525425  |
| 2 | 2p12   | 79341841  | 2p11.2 | 85513118  | cattle | 6171277   | 220798   |
| 2 | 2p11.2 | 85733916  | 2p11.2 | 86962867  | cattle | 1228951   | 8257528  |
| 2 | 2q11.2 | 95220395  | 2q13   | 111831391 | cattle | 16610996  | 1606917  |
| 2 | 2q13   | 113438308 | 2q13   | 113867305 | cattle | 428997    | 687046   |
| 2 | 2q14.1 | 114554351 | 2q14.2 | 121015788 | cattle | 6461437   | 6694753  |
| 2 | 2q14.3 | 127710541 | 2q21.1 | 131827274 | cattle | 4116733   | 3408385  |
| 2 | 2q21.3 | 135235659 | 2q21.3 | 135943001 | cattle | 707342    | 7966210  |
| 2 | 2q22   | 143909211 | 2q31   | 183695912 | cattle | 39786701  | 4598359  |
| 2 | 2q32.1 | 188294271 | 2q32.2 | 188294465 | cattle | 194       | 2738919  |
| 2 | 2q32.2 | 191033384 | 2q32.2 | 191148604 | cattle | 115220    | 23615    |
| 2 | 2q32.2 | 191172219 | 2q32.2 | 191200413 | cattle | 28194     | 64631    |
| 2 | 2q32.2 | 191265044 | 2q32.2 | 191337954 | cattle | 72910     | 459830   |
| 2 | 2q32.2 | 191797784 | 2q34   | 209083854 | cattle | 17286070  | 7056857  |
| 2 | 2q35   | 216140711 | 2q36   | 224431140 | cattle | 8290429   | 3869747  |
| 2 | 2q36   | 228300887 | 2q37.1 | 232637976 | cattle | 4337089   | 1594843  |
| 2 | 2q37.1 | 234232819 | 2q37.3 | 242142249 | cattle | 7909430   | 495566   |
| 2 | 2q37.3 | 242637815 | 2q37.3 | 242639521 | cattle | 1706      | 431869   |
| 2 | 2q37.3 | 243071390 | 2q37.3 | 243071502 | cattle | 112       |          |
| 3 | 3p26   | 4526981   | 3p25   | 10160699  | cattle | 5633718   | 1125547  |
| 3 | 3p25   | 11286246  | 3p25   | 11296261  | cattle | 10015     | 3991957  |
| 3 | 3p25   | 15288218  | 3p25   | 15374753  | cattle | 86535     | 5935035  |
| 3 | 3p24   | 21309788  | 3p24   | 21309938  | cattle | 150       | 5954077  |
| 3 | 3p24   | 27264015  | 3p22   | 40167131  | cattle | 12903116  | 2275443  |

|   |         |           |         |           |        |          |          |
|---|---------|-----------|---------|-----------|--------|----------|----------|
| 3 | 3p22    | 42442574  | 3p22    | 42528308  | cattle | 85734    | 3021779  |
| 3 | 3p21.3  | 45550087  | 3p21.3  | 50149543  | cattle | 4599456  | 6829322  |
| 3 | 3p14.3  | 56978865  | 3p13    | 71608550  | cattle | 14629685 | 5344235  |
| 3 | 3p12    | 76952785  | 3q21    | 126014321 | cattle | 49061536 | 2584573  |
| 3 | 3q21    | 128598894 | 3q21    | 130535798 | cattle | 1936904  | 1164778  |
| 3 | 3q21    | 131700576 | 3q21    | 131701180 | cattle | 604      | 193266   |
| 3 | 3q21    | 131894446 | 3q22    | 137949578 | cattle | 6055132  | 1995101  |
| 3 | 3q22    | 139944679 | 3q23    | 144060636 | cattle | 4115957  | 5636573  |
| 3 | 3q24    | 149697209 | 3q24    | 149742427 | cattle | 45218    | 4091920  |
| 3 | 3q25    | 153834347 | 3q29    | 198918819 | cattle | 45084472 |          |
| 4 | 4p16    | 657092    | 4p16    | 657757    | cattle | 665      | 3604402  |
| 4 | 4p16    | 4262159   | 4p16    | 5815903   | cattle | 1553744  | 894641   |
| 4 | 4p16    | 6710544   | 4p15.3  | 17202205  | cattle | 10491661 | 2741026  |
| 4 | 4p15.3  | 19943231  | 4q22    | 88978287  | cattle | 69035056 | 135235   |
| 4 | 4q22    | 89113522  | 4q26    | 120943179 | cattle | 31829657 | 2626041  |
| 4 | 4q27    | 123569220 | 4q32    | 156604414 | cattle | 33035194 | 496470   |
| 4 | 4q32    | 157100884 | 4q32    | 160110729 | cattle | 3009845  | 14727044 |
| 4 | 4q34    | 174837773 | 4q34    | 174838785 | cattle | 1012     | 11361297 |
| 4 | 4q34    | 186200082 | 4q35    | 188229437 | cattle | 2029355  |          |
| 5 | 5p15.3  | 6747464   | 5q13.3  | 74052866  | cattle | 67305402 | 6592876  |
| 5 | 5q14    | 80645742  | 5q14    | 80647195  | cattle | 1453     | 17344    |
| 5 | 5q14    | 80664539  | 5q21    | 108558257 | cattle | 27893718 | 14154241 |
| 5 | 5q23.2  | 122712498 | 5q23.2  | 122790149 | cattle | 77651    | 8637061  |
| 5 | 5q23.3  | 131427210 | 5q23.3  | 132144366 | cattle | 717156   | 98210    |
| 5 | 5q23.3  | 132242576 | 5q32    | 146444172 | cattle | 14201596 | 3320190  |
| 5 | 5q32    | 149764362 | 5q34    | 161261955 | cattle | 11497593 | 1538165  |
| 5 | 5q34    | 162800120 | 5q34    | 162807563 | cattle | 7443     | 6192273  |
| 5 | 5q35    | 168999836 | 5q34    | 169660774 | cattle | 660938   | 6835593  |
| 5 | 5q35    | 176496367 | 5q35    | 176658350 | cattle | 161983   | 88708    |
| 5 | 5q35    | 176747058 | 5q35    | 180306851 | cattle | 3559793  |          |
| 6 | 6p25    | 2938393   | 6p21.3  | 32560586  | cattle | 29622193 | 44050    |
| 6 | 6p21.3  | 32604636  | 6p12    | 53135692  | cattle | 20531056 | 2485960  |
| 6 | 6p12    | 55621652  | 6p12    | 56893536  | cattle | 1271884  | 14434101 |
| 6 | 6q13    | 71327637  | 6q14    | 83026802  | cattle | 11699165 | 16821559 |
| 6 | 6q16.2  | 99848361  | 6q22.1  | 116447426 | cattle | 16599065 | 1434714  |
| 6 | 6q22.1  | 117882140 | 6q22.3  | 127599865 | cattle | 9717725  | 1539607  |
| 6 | 6q22.3  | 129139472 | 6q27    | 168047271 | cattle | 38907799 |          |
| 7 | 7p22    | 2104812   | 7p22    | 6456942   | cattle | 4352130  | 5863598  |
| 7 | 7p21    | 12320540  | 7p21    | 12403564  | cattle | 83024    | 10815838 |
| 7 | 7p15.3  | 23219402  | 7p15.3  | 23274348  | cattle | 54946    | 2765439  |
| 7 | 7p15.2  | 26039787  | 7p13    | 45667651  | cattle | 19627864 | 9788866  |
| 7 | 7p11.2  | 55456517  | 7p11.2  | 55488695  | cattle | 32178    | 251338   |
| 7 | 7p11.2  | 55740033  | 7p11.2  | 55775620  | cattle | 35587    | 9292508  |
| 7 | 7q11.21 | 65068128  | 7q11.23 | 75845912  | cattle | 10777784 | 3516478  |
| 7 | 7q21.1  | 79362390  | 7q21.3  | 96967711  | cattle | 17605321 | 876493   |
| 7 | 7q22    | 97844204  | 7q22    | 100328878 | cattle | 2484674  | 2984642  |
| 7 | 7q22    | 103313520 | 7q31.1  | 107193133 | cattle | 3879613  | 4200239  |
| 7 | 7q31.1  | 111393372 | 7q31.2  | 116849416 | cattle | 5456044  | 4204471  |
| 7 | 7q31.3  | 121053887 | 7q36    | 151447936 | cattle | 30394049 |          |
| 8 | 8p23.1  | 9782861   | 8p23.1  | 11567741  | cattle | 1784880  | 1148323  |
| 8 | 8p22    | 12716064  | 8p22    | 12909249  | cattle | 193185   | 2831333  |
| 8 | 8p22    | 15740582  | 8p22    | 17751798  | cattle | 2011216  | 1319179  |
| 8 | 8p22    | 19070977  | 8p21    | 19269574  | cattle | 198597   | 336497   |
| 8 | 8p21    | 19606071  | 8p21    | 22698277  | cattle | 3092206  | 4577517  |
| 8 | 8p21    | 27275794  | 8p21    | 28021411  | cattle | 745617   | 2834977  |
| 8 | 8p12    | 30856388  | 8p12    | 32478311  | cattle | 1621923  | 5219387  |
| 8 | 8p12    | 37697698  | 8p11.2  | 42492813  | cattle | 4795115  | 9578639  |
| 8 | 8q11.2  | 52071452  | 8q11.2  | 52071773  | cattle | 321      | 1186430  |

|    |         |           |          |           |        |          |          |
|----|---------|-----------|----------|-----------|--------|----------|----------|
| 8  | 8q11.2  | 53258203  | 8q12     | 59218602  | cattle | 5960399  | 222560   |
| 8  | 8q12    | 59441162  | 8q21.1   | 74465892  | cattle | 15024730 | 4845275  |
| 8  | 8q21.1  | 79311167  | 8q21.1   | 82118658  | cattle | 2807491  | 174717   |
| 8  | 8q21.1  | 82293375  | 8q21.2   | 86141302  | cattle | 3847927  | 10553597 |
| 8  | 8q22.1  | 96694899  | 8q22.1   | 96695260  | cattle | 361      | 4688677  |
| 8  | 8q22.2  | 101383937 | 8q22.3   | 103242039 | cattle | 1858102  | 837621   |
| 8  | 8q22.3  | 104079660 | 8q23     | 109800606 | cattle | 5720946  | 7525264  |
| 8  | 8q23    | 117325870 | 8q23     | 117447292 | cattle | 121422   | 754458   |
| 8  | 8q24.1  | 118201750 | 8q24.1   | 120105393 | cattle | 1903643  | 306420   |
| 8  | 8q24.1  | 120411813 | 8q24.1   | 120513872 | cattle | 102059   | 1780466  |
| 8  | 8q24.1  | 122294338 | 8q24.3   | 144938033 | cattle | 22643695 |          |
| 9  | 9p24    | 356238    | 9p21     | 32563350  | cattle | 32207112 | 530731   |
| 9  | 9p21    | 33094081  | 9p13     | 37856457  | cattle | 4762376  | 26858072 |
| 9  | 9q13    | 64714529  | 9q21.1   | 72692449  | cattle | 7977920  | 7138380  |
| 9  | 9q21.3  | 79830829  | 9q21.3   | 79831533  | cattle | 704      | 1362542  |
| 9  | 9q21.3  | 81194075  | 9q21.3   | 81194393  | cattle | 318      | 2941994  |
| 9  | 9q21.3  | 84136387  | 9q31     | 110814313 | cattle | 26677926 | 6846617  |
| 9  | 9q33    | 117660930 | 9q34.2   | 133812198 | cattle | 16151268 |          |
| 10 | 10p15   | 17643     | 10p15    | 5600634   | cattle | 5582991  | 7869405  |
| 10 | 10p13   | 13470039  | 10p12.2  | 23561177  | cattle | 10091138 | 4552749  |
| 10 | 10p12.1 | 28113926  | 10p11.2  | 30174969  | cattle | 2061043  | 3014204  |
| 10 | 10p11.2 | 33189173  | 10p11.2  | 33189252  | cattle | 79       | 668330   |
| 10 | 10p11.2 | 33857582  | 10p11.2  | 36080601  | cattle | 2223019  | 2416208  |
| 10 | 10q11.2 | 38496809  | 10q11.2  | 43537563  | cattle | 5040754  | 1103247  |
| 10 | 10q11.2 | 44640810  | 10q11.2  | 51023128  | cattle | 6382318  | 935629   |
| 10 | 10q11.2 | 51958757  | 10q11.2  | 51959007  | cattle | 250      | 1390416  |
| 10 | 10q21.1 | 53349423  | 10q21.1  | 58013421  | cattle | 4663998  | 3667140  |
| 10 | 10q21.2 | 61680561  | 10q23.1  | 86150931  | cattle | 24470370 | 4252713  |
| 10 | 10q23.3 | 90403644  | 10q24.3  | 105084506 | cattle | 14680862 | 7099519  |
| 10 | 10q25.2 | 112184025 | 10q26.3  | 135121309 | cattle | 22937284 |          |
| 11 | 11p15.5 | 945884    | 11p15.5  | 2972880   | cattle | 2026996  | 634042   |
| 11 | 11p15.4 | 3606922   | 11p15.1  | 18086368  | cattle | 14479446 | 253131   |
| 11 | 11p15.1 | 18339499  | 11p14    | 23516713  | cattle | 5177214  | 2853375  |
| 11 | 11p14   | 26370088  | 11q12    | 59884931  | cattle | 33514843 | 1024144  |
| 11 | 11q12   | 60909075  | 11q13.3  | 68708644  | cattle | 7799569  | 3156579  |
| 11 | 11q13.4 | 71865223  | 11q13.5  | 76385891  | cattle | 4520668  | 1057193  |
| 11 | 11q14.1 | 77443084  | 11q14.1  | 79558251  | cattle | 2115167  | 1291879  |
| 11 | 11q14.1 | 80850130  | 11q14.1  | 82834337  | cattle | 1984207  | 558482   |
| 11 | 11q14.1 | 83392819  | 11q14.3  | 88767869  | cattle | 5375050  | 5982849  |
| 11 | 11q21   | 94750718  | 11q22.3  | 104299321 | cattle | 9548603  | 3348645  |
| 11 | 11q22.3 | 107647966 | 11q24    | 122966757 | cattle | 15318791 | 1704268  |
| 11 | 11q24   | 124671025 | 11q25    | 134055118 | cattle | 9384093  |          |
| 12 | 12p13.3 | 4262199   | 12p11.2  | 32950041  | cattle | 28687842 | 7639582  |
| 12 | 12p12   | 40589623  | 12q13.2  | 54689770  | cattle | 14100147 | 1105333  |
| 12 | 12q13.3 | 55795103  | 12q21.1  | 70543513  | cattle | 14748410 | 9557621  |
| 12 | 12q21.3 | 80101134  | 12q22    | 93768986  | cattle | 13667852 | 2827149  |
| 12 | 12q23   | 96596135  | 12q23    | 104099339 | cattle | 7503204  | 4872496  |
| 12 | 12q24.1 | 108971835 | 12q24.33 | 132906549 | cattle | 23934714 |          |
| 13 | 13q12.1 | 20823750  | 13q12.1  | 20824838  | cattle | 1088     | 33210    |
| 13 | 13q12.1 | 20858048  | 13q14.3  | 52250584  | cattle | 31392536 | 20015595 |
| 13 | 13q22   | 72266179  | 13q34    | 113064619 | cattle | 40798440 |          |
| 14 | 14q11.2 | 18904698  | 14q11.2  | 22900668  | cattle | 3995970  | 6433091  |
| 14 | 14q12   | 29333759  | 14q21    | 37562478  | cattle | 8228719  | 6186963  |
| 14 | 14q21   | 43749441  | 14q21    | 43749643  | cattle | 202      | 4815751  |
| 14 | 14q21   | 48565394  | 14q21    | 48573670  | cattle | 8276     | 2436374  |
| 14 | 14q22   | 51010044  | 14q22    | 51093480  | cattle | 83436    | 220551   |
| 14 | 14q22   | 51314031  | 14q31    | 84084304  | cattle | 32770273 | 5643406  |
| 14 | 14q32.1 | 89727710  | 14q32.3  | 103233692 | cattle | 13505982 |          |

|    |          |           |          |           |        |          |          |
|----|----------|-----------|----------|-----------|--------|----------|----------|
| 15 | 15q11.2  | 20423754  | 15q11.2  | 20452813  | cattle | 29059    | 5370199  |
| 15 | 15q13    | 25823012  | 15q13    | 26034151  | cattle | 211139   | 1106522  |
| 15 | 15q13    | 27140673  | 15q13    | 29349843  | cattle | 2209170  | 7009599  |
| 15 | 15q14    | 36359442  | 15q15    | 41092619  | cattle | 4733177  | 151727   |
| 15 | 15q15    | 41244346  | 15q15    | 41673925  | cattle | 429579   | 908928   |
| 15 | 15q15    | 42582853  | 15q15    | 42589480  | cattle | 6627     | 4159750  |
| 15 | 15q21.1  | 46749230  | 15q22.3  | 62574353  | cattle | 15825123 | 908250   |
| 15 | 15q22.3  | 63482603  | 15q23    | 70139318  | cattle | 6656715  | 2572680  |
| 15 | 15q24    | 72711998  | 15q25    | 80399292  | cattle | 7687294  | 3480214  |
| 15 | 15q25    | 83879506  | 15q26.3  | 99785313  | cattle | 15905807 |          |
| 16 | 16p13.3  | 1218338   | 16p13.1  | 11341619  | cattle | 10123281 | 7380109  |
| 16 | 16p12    | 18721728  | 16p11.2  | 31200072  | cattle | 12478344 | 15263811 |
| 16 | 16q12.1  | 46463883  | 16q22    | 69496123  | cattle | 23032240 | 387479   |
| 16 | 16q22    | 69883602  | 16q23    | 70570481  | cattle | 686879   | 1090249  |
| 16 | 16q22    | 71660730  | 16q23    | 72828038  | cattle | 1167308  | 1396493  |
| 16 | 16q23    | 74224531  | 16q24    | 89509172  | cattle | 15284641 |          |
| 17 | 17p13    | 962865    | 17p11.2  | 18056321  | cattle | 17093456 | 8590387  |
| 17 | 17q11.2  | 26646708  | 17q11.2  | 26647099  | cattle | 391      | 589335   |
| 17 | 17q11.2  | 27236434  | 17q12    | 33264971  | cattle | 6028537  | 4208221  |
| 17 | 17q21.2  | 37473192  | 17q21.3  | 40823819  | cattle | 3350627  | 2382334  |
| 17 | 17q21.3  | 43206153  | 17q21.3  | 43206254  | cattle | 101      | 2744307  |
| 17 | 17q21.3  | 45950561  | 17q22    | 48905415  | cattle | 2954854  | 9133727  |
| 17 | 17q23    | 58039142  | 17q23    | 59812060  | cattle | 1772918  | 2433562  |
| 17 | 17q24    | 62245622  | 17q24    | 62956701  | cattle | 711079   | 1668993  |
| 17 | 17q24    | 64625694  | 17q25    | 81429122  | cattle | 16803428 |          |
| 18 | 18p11.32 | 148520    | 18p11.32 | 901054    | cattle | 752534   | 6168942  |
| 18 | 18p11.31 | 7069996   | 18p11.2  | 13875520  | cattle | 6805524  | 10448449 |
| 18 | 18q12.1  | 24323969  | 18q21.1  | 28824451  | cattle | 4500482  | 3979500  |
| 18 | 18q12.2  | 32803951  | 18q12.3  | 40737968  | cattle | 7934017  | 3540942  |
| 18 | 18q21.1  | 44278910  | 18q21.1  | 48362259  | cattle | 4083349  | 4466860  |
| 18 | 18q21.2  | 52829119  | 18q22    | 60432639  | cattle | 7603520  | 907277   |
| 18 | 18q22    | 61339916  | 18q22    | 61356094  | cattle | 16178    | 10349412 |
| 18 | 18q23    | 71705506  | 18q23    | 77632403  | cattle | 5926897  |          |
| 19 | 19p13.3  | 737411    | 19p13.3  | 752327    | cattle | 14916    | 12770    |
| 19 | 19p13.3  | 765097    | 19p13.3  | 1921309   | cattle | 1156212  | 288214   |
| 19 | 19p13.3  | 2209523   | 19p13.3  | 5093605   | cattle | 2884082  | 2786001  |
| 19 | 19p13.2  | 7879606   | 19p13.1  | 12837529  | cattle | 4957923  | 271560   |
| 19 | 19p13.1  | 13109089  | 19p13.1  | 19463359  | cattle | 6354270  | 4323065  |
| 19 | 19p12    | 23786424  | 19p12    | 23786909  | cattle | 485      | 10587307 |
| 19 | 19q12    | 34374216  | 19q12    | 34380163  | cattle | 5947     | 393076   |
| 19 | 19q12    | 34773239  | 19q13.4  | 63627610  | cattle | 28854371 |          |
| 20 | 20p13    | 336697    | 20p13    | 367193    | cattle | 30496    | 2219848  |
| 20 | 20p13    | 2587041   | 20p12    | 5854003   | cattle | 3266962  | 2207293  |
| 20 | 20p12    | 8061296   | 20p12    | 10555474  | cattle | 2494178  | 5645276  |
| 20 | 20p12    | 16200750  | 20p12    | 16670419  | cattle | 469669   | 752132   |
| 20 | 20p12    | 17422551  | 20p11.2  | 23566574  | cattle | 6144023  | 7911733  |
| 20 | 20q11.2  | 31478307  | 20q13.1  | 49194684  | cattle | 17716377 | 6377760  |
| 20 | 20q13.3  | 55572444  | 20q13.3  | 63246709  | cattle | 7674265  |          |
| 21 | 21q11.2  | 14665471  | 21q22.1  | 34224306  | cattle | 19558835 | 2138385  |
| 21 | 21q22.1  | 36362691  | 21q22.3  | 45205395  | cattle | 8842704  |          |
| 22 | 22q11.2  | 16644972  | 22q11.2  | 16685103  | cattle | 40131    | 589660   |
| 22 | 22q11.2  | 17274763  | 22q11.2  | 22451056  | cattle | 5176293  | 1469323  |
| 22 | 22q11.2  | 23920379  | 22q12.2  | 30013052  | cattle | 6092673  | 1509143  |
| 22 | 22q12.3  | 31522195  | 22q12.3  | 35668902  | cattle | 4146707  | 744130   |
| 22 | 22q13.1  | 36413032  | 22q13.1  | 36413528  | cattle | 496      | 516209   |
| 22 | 22q13.1  | 36929737  | 22q13.3  | 49316132  | cattle | 12386395 |          |
| X  | Xp22.3   | 1081075   | Xq13.3   | 75082961  | cattle | 74001886 | 25981742 |
| X  | Xq22.1   | 101064703 | Xq23     | 112920937 | cattle | 11856234 | 2916034  |

|   |        |           |        |           |         |          |          |
|---|--------|-----------|--------|-----------|---------|----------|----------|
| X | Xq23   | 115836971 | Xq28   | 151591310 | cattle  | 35754339 |          |
| 1 | 1p36.3 | 891967    | 1p36.2 | 8014674   | chicken | 7122707  | 332039   |
| 1 | 1p36.2 | 8346713   | 1p36.2 | 11280458  | chicken | 2933745  | 4507562  |
| 1 | 1p36.1 | 15788020  | 1p36.1 | 19966204  | chicken | 4178184  | 2184001  |
| 1 | 1p36.1 | 22150205  | 1p36.1 | 23037279  | chicken | 887074   | 54394    |
| 1 | 1p36.1 | 23091673  | 1p36.1 | 26808478  | chicken | 3716805  | 28691    |
| 1 | 1p36.1 | 26837169  | 1p35   | 31511526  | chicken | 4674357  | 246620   |
| 1 | 1p35   | 31758146  | 1p34.3 | 39001878  | chicken | 7243732  | 213843   |
| 1 | 1p34.3 | 39215721  | 1p34.2 | 40232231  | chicken | 1016510  | 761012   |
| 1 | 1p34.2 | 40993243  | 1p34.2 | 42132810  | chicken | 1139567  | 1149889  |
| 1 | 1p34.2 | 43282699  | 1p31.2 | 66552275  | chicken | 23269576 | 3385611  |
| 1 | 1p31.1 | 69937886  | 1p31.1 | 75478444  | chicken | 5540558  | 773992   |
| 1 | 1p31.1 | 76252436  | 1p21   | 103834130 | chicken | 27581694 | 109465   |
| 1 | 1p21   | 103943595 | 1p13   | 109278244 | chicken | 5334649  | 983388   |
| 1 | 1p13   | 110261632 | 1p13   | 110944090 | chicken | 682458   | 753892   |
| 1 | 1p13   | 111697982 | 1p13   | 115305369 | chicken | 3607387  | 600523   |
| 1 | 1p13   | 115905892 | 1p12   | 119700778 | chicken | 3794886  | 38820215 |
| 1 | 1q23   | 158520993 | 1q23   | 158771765 | chicken | 250772   | 1356465  |
| 1 | 1q23   | 160128230 | 1q23   | 162129946 | chicken | 2001716  | 4177896  |
| 1 | 1q24   | 166307842 | 1q25   | 177159077 | chicken | 10851235 | 12351659 |
| 1 | 1q31   | 189510736 | 1q32   | 197561509 | chicken | 8050773  | 274824   |
| 1 | 1q32   | 197836333 | 1q32   | 199875897 | chicken | 2039564  | 130131   |
| 1 | 1q32   | 200006028 | 1q32   | 200444937 | chicken | 438909   | 364359   |
| 1 | 1q32   | 200809296 | 1q32   | 206363172 | chicken | 5553876  | 28608    |
| 1 | 1q32   | 206391780 | 1q42   | 222902670 | chicken | 16510890 | 223354   |
| 1 | 1q42   | 223126024 | 1q42   | 223813187 | chicken | 687163   | 599878   |
| 1 | 1q42   | 224413065 | 1q42   | 224873215 | chicken | 460150   | 840392   |
| 1 | 1q42   | 225713607 | 1q44   | 243424274 | chicken | 17710667 |          |
| 2 | 2p25.3 | 35395     | 2p23   | 24462884  | chicken | 24427489 | 1223325  |
| 2 | 2p23   | 25686209  | 2p23   | 27784720  | chicken | 2098511  | 3219     |
| 2 | 2p23   | 27787939  | 2p23   | 28551956  | chicken | 764017   | 398549   |
| 2 | 2p23   | 28950505  | 2p23   | 31402964  | chicken | 2452459  | 1011648  |
| 2 | 2p22   | 32414612  | 2p22   | 38353401  | chicken | 5938789  | 0        |
| 2 | 2p22   | 38353401  | 2p22   | 40844899  | chicken | 2491498  | 1171063  |
| 2 | 2p21   | 42015962  | 2p21   | 47378320  | chicken | 5362358  | 543628   |
| 2 | 2p16   | 47921948  | 2p16   | 53253989  | chicken | 5332041  | 585024   |
| 2 | 2p16   | 53839013  | 2p15   | 61677308  | chicken | 7838295  | 950646   |
| 2 | 2p15   | 62627954  | 2p13   | 68716960  | chicken | 6089006  | 196581   |
| 2 | 2p13   | 68913541  | 2p13   | 69695825  | chicken | 782284   | 2041333  |
| 2 | 2p13   | 71737158  | 2p13   | 73432621  | chicken | 1695463  | 2817590  |
| 2 | 2p12   | 76250211  | 2p12   | 77699659  | chicken | 1449448  | 2297029  |
| 2 | 2p12   | 79996688  | 2p11.2 | 88752637  | chicken | 8755949  | 9842303  |
| 2 | 2q11.2 | 98594940  | 2q13   | 109734101 | chicken | 11139161 | 2512044  |
| 2 | 2q13   | 112246145 | 2q13   | 112807186 | chicken | 561041   | 1380330  |
| 2 | 2q14.1 | 114187516 | 2q14.2 | 120089519 | chicken | 5902003  | 193999   |
| 2 | 2q14.2 | 120283518 | 2q14.3 | 127356291 | chicken | 7072773  | 535917   |
| 2 | 2q14.3 | 127892208 | 2q21.1 | 131738252 | chicken | 3846044  | 1266438  |
| 2 | 2q21.2 | 133004690 | 2q24.2 | 160450291 | chicken | 27445601 | 36795    |
| 2 | 2q24.2 | 160487086 | 2q32.1 | 183465674 | chicken | 22978588 | 20266307 |
| 2 | 2q33   | 203731981 | 2q33   | 208730414 | chicken | 4998433  | 1539115  |
| 2 | 2q34   | 210269529 | 2q35   | 216408870 | chicken | 6139341  | 377319   |
| 2 | 2q35   | 216786189 | 2q35   | 220332157 | chicken | 3545968  | 38660    |
| 2 | 2q35   | 220370817 | 2q36   | 230759214 | chicken | 10388397 | 987890   |
| 2 | 2q37.1 | 231747104 | 2q37.1 | 233271732 | chicken | 1524628  | 51577    |
| 2 | 2q37.1 | 233323309 | 2q37.1 | 234162762 | chicken | 839453   | 2140197  |
| 2 | 2q37.2 | 236302959 | 2q37.3 | 239853848 | chicken | 3550889  | 1522789  |
| 2 | 2q37.3 | 241376637 | 2q37.3 | 242244186 | chicken | 867549   |          |
| 3 | 3p26   | 38251     | 3p25   | 9401361   | chicken | 9363110  | 38119    |

|   |        |           |        |           |         |          |          |
|---|--------|-----------|--------|-----------|---------|----------|----------|
| 3 | 3p25   | 9439480   | 3p25   | 9968818   | chicken | 529338   | 373689   |
| 3 | 3p25   | 10342507  | 3p25   | 13896319  | chicken | 3553812  | 0        |
| 3 | 3p25   | 13896319  | 3p25   | 15112644  | chicken | 1216325  | 355150   |
| 3 | 3p25   | 15467794  | 3p23   | 32805550  | chicken | 17337756 | 164357   |
| 3 | 3p23   | 32969907  | 3p22   | 37067234  | chicken | 4097327  | 2256     |
| 3 | 3p22   | 37069490  | 3p22   | 37840031  | chicken | 770541   | 112818   |
| 3 | 3p22   | 37952849  | 3p22   | 39170169  | chicken | 1217320  | 1715850  |
| 3 | 3p22   | 40886019  | 3p22   | 42280144  | chicken | 1394125  | 769103   |
| 3 | 3p22   | 42547254  | 3p22   | 42892325  | chicken | 345071   |          |
| 3 | 3p22   | 43049247  | 3p21.3 | 46425544  | chicken | 3376297  | 1774797  |
| 3 | 3p21.3 | 46920035  | 3p21.3 | 48200341  | chicken | 1280306  | 0        |
| 3 | 3p21.3 | 48200341  | 3p21.3 | 49188285  | chicken | 987944   | 334548   |
| 3 | 3p21.3 | 49522833  | 3p21.2 | 52454845  | chicken | 2932012  | 779828   |
| 3 | 3p21.2 | 53234673  | 3p12   | 75384120  | chicken | 22149447 | 572703   |
| 3 | 3p12   | 75956823  | 3p12   | 87417864  | chicken | 11461041 | 769302   |
| 3 | 3q11.2 | 88187166  | 3q11.2 | 90390621  | chicken | 2203455  | 4684763  |
| 3 | 3q11.2 | 95075384  | 3q11.2 | 98986611  | chicken | 3911227  | 1570815  |
| 3 | 3q12   | 100557426 | 3q13.2 | 113163762 | chicken | 12606336 | 570161   |
| 3 | 3q13.2 | 113733923 | 3q13.3 | 122746458 | chicken | 9012535  | 709006   |
| 3 | 3q21   | 123455464 | 3q21   | 123668981 | chicken | 213517   | 272884   |
| 3 | 3q21   | 123941865 | 3q21   | 126784631 | chicken | 2842766  | 1149963  |
| 3 | 3q21   | 127934594 | 3q21   | 130016373 | chicken | 2081779  | 69735    |
| 3 | 3q21   | 130086108 | 3q21   | 130373357 | chicken | 287249   | 209418   |
| 3 | 3q21   | 130582775 | 3q21   | 131030058 | chicken | 447283   | 547660   |
| 3 | 3q21   | 131577718 | 3q22   | 134860720 | chicken | 3283002  | 146687   |
| 3 | 3q22   | 135007407 | 3q22   | 137100488 | chicken | 2093081  | 102427   |
| 3 | 3q22   | 137202915 | 3q22   | 137832526 | chicken | 629611   | 408061   |
| 3 | 3q22   | 138240587 | 3q23   | 142267635 | chicken | 4027048  | 318960   |
| 3 | 3q23   | 142586595 | 3q24   | 146396455 | chicken | 3809860  | 1245343  |
| 3 | 3q24   | 147641798 | 3q24   | 149667183 | chicken | 2025385  | 527345   |
| 3 | 3q24   | 150194528 | 3q25   | 152657728 | chicken | 2463200  | 4022225  |
| 3 | 3q25   | 156679953 | 3q26.3 | 177663502 | chicken | 20983549 | 4139067  |
| 3 | 3q26.3 | 181802569 | 3q27   | 184542346 | chicken | 2739777  | 3884886  |
| 3 | 3q27   | 188427232 | 3q29   | 195890199 | chicken | 7462967  | 1648780  |
| 3 | 3q29   | 197538979 | 3q29   | 199171045 | chicken | 1632066  |          |
| 4 | 4p16   | 833223    | 4p16   | 951495    | chicken | 118272   | 185693   |
| 4 | 4p16   | 1137188   | 4p16   | 3532198   | chicken | 2395010  | 5927840  |
| 4 | 4p16   | 9460038   | 4p12   | 48535002  | chicken | 39074964 | 4766307  |
| 4 | 4q12   | 53301309  | 4q12   | 57166633  | chicken | 3865324  | 1266591  |
| 4 | 4q12   | 58433224  | 4q21.1 | 78344753  | chicken | 19911529 | 1147037  |
| 4 | 4q21.2 | 79491790  | 4q21.2 | 79819632  | chicken | 327842   | 111161   |
| 4 | 4q21.2 | 79930793  | 4q21.2 | 86138934  | chicken | 6208141  | 3522514  |
| 4 | 4q22   | 89661448  | 4q22   | 95596429  | chicken | 5934981  | 205013   |
| 4 | 4q22   | 95801442  | 4q22   | 97970827  | chicken | 2169385  | 12832212 |
| 4 | 4q25   | 110803039 | 4q28   | 128763245 | chicken | 17960206 | 158617   |
| 4 | 4q28   | 128921862 | 4q28   | 130154003 | chicken | 1232141  | 305250   |
| 4 | 4q28   | 130459253 | 4q31.3 | 153767367 | chicken | 23308114 | 663595   |
| 4 | 4q31.3 | 154430962 | 4q33   | 171049735 | chicken | 16618773 | 1259942  |
| 4 | 4q34   | 172309677 | 4q33   | 172648942 | chicken | 339265   | 5876385  |
| 4 | 4q34   | 178525327 | 4q35   | 186718890 | chicken | 8193563  | 6707     |
| 4 | 4q35   | 186725597 | 4q35   | 191201761 | chicken | 4476164  |          |
| 5 | 5p15.3 | 526079    | 5p15.3 | 1147393   | chicken | 621314   | 107180   |
| 5 | 5p15.3 | 1254573   | 5p15.3 | 4902020   | chicken | 3647447  | 1523601  |
| 5 | 5p15.3 | 6425621   | 5p13.3 | 31589007  | chicken | 25163386 | 9127761  |
| 5 | 5p13.1 | 40716768  | 5p12   | 45729795  | chicken | 5013027  | 4269310  |
| 5 | 5p11.2 | 49999105  | 5q11.2 | 53553691  | chicken | 3554586  | 1034189  |
| 5 | 5q11.2 | 54587880  | 5q13.2 | 68600910  | chicken | 14013030 | 2864783  |
| 5 | 5q13.2 | 71465693  | 5q13.3 | 76313068  | chicken | 4847375  | 2296359  |



|   |         |           |         |           |         |          |          |
|---|---------|-----------|---------|-----------|---------|----------|----------|
| 5 | 5q14    | 78609427  | 5q14    | 79534645  | chicken | 925218   | 199650   |
| 5 | 5q14    | 79734295  | 5q14    | 86265663  | chicken | 6531368  | 1847073  |
| 5 | 5q14    | 88112736  | 5q15    | 95873089  | chicken | 7760353  | 466745   |
| 5 | 5q15    | 96339834  | 5q21    | 104502724 | chicken | 8162890  | 21461656 |
| 5 | 5q23.2  | 125964380 | 5q23.3  | 128192279 | chicken | 2227899  | 2595225  |
| 5 | 5q23.3  | 130787504 | 5q31.2  | 137466957 | chicken | 6679453  | 11887366 |
| 5 | 5q32    | 149354323 | 5q33.3  | 158645657 | chicken | 9291334  | 630316   |
| 5 | 5q33.3  | 159275973 | 5q35    | 174203875 | chicken | 14927902 | 4269359  |
| 5 | 5q35    | 178473234 | 5q35    | 179400258 | chicken | 927024   |          |
| 6 | 6p25    | 281821    | 6p23    | 13595107  | chicken | 13313286 | 4634506  |
| 6 | 6p22.3  | 18229613  | 6p22.2  | 24704874  | chicken | 6475261  | 54121    |
| 6 | 6p22.3  | 24758995  | 6p22.2  | 25809635  | chicken | 1050640  | 24476    |
| 6 | 6p22.2  | 25834111  | 6p22.1  | 26430578  | chicken | 596467   | 7218809  |
| 6 | 6p21.3  | 33649387  | 6p21.3  | 35546505  | chicken | 1897118  | 2855     |
| 6 | 6p21.3  | 35549360  | 6p21.3  | 36308562  | chicken | 759202   | 1121055  |
| 6 | 6p21.2  | 37429617  | 6p21.1  | 41039056  | chicken | 3609439  | 408769   |
| 6 | 6p21.1  | 41447825  | 6p21.1  | 42153061  | chicken | 705236   | 404925   |
| 6 | 6p21.1  | 42557986  | 6p21.1  | 42944344  | chicken | 386358   | 137885   |
| 6 | 6p21.1  | 43082229  | 6p21.1  | 43300164  | chicken | 217935   | 111554   |
| 6 | 6p21.1  | 43411718  | 6p21.1  | 44388292  | chicken | 976574   | 75096    |
| 6 | 6p21.1  | 44463388  | 6p12    | 52489510  | chicken | 8026122  | 222845   |
| 6 | 6p12    | 52712355  | 6p12    | 58195502  | chicken | 5483147  | 4110704  |
| 6 | 6q12    | 62306206  | 6q24    | 144336485 | chicken | 82030279 | 473871   |
| 6 | 6q24    | 144810356 | 6q25.3  | 159167979 | chicken | 14357623 | 905739   |
| 6 | 6q25.3  | 160073718 | 6q27    | 170811262 | chicken | 10737544 |          |
| 7 | 7p22    | 490865    | 7p22    | 5573946   | chicken | 5083081  | 408958   |
| 7 | 7p22    | 5982904   | 7p22    | 6297062   | chicken | 314158   | 749900   |
| 7 | 7p21    | 7046962   | 7p15.1  | 29364849  | chicken | 22317887 | 8825649  |
| 7 | 7p14    | 38190498  | 7p13    | 43453589  | chicken | 5263091  | 1933895  |
| 7 | 7p13    | 45387484  | 7p12    | 47252589  | chicken | 1865105  | 655323   |
| 7 | 7p12    | 47907912  | 7p11.2  | 54457923  | chicken | 6550011  | 526197   |
| 7 | 7p11.2  | 54984120  | 7p11.2  | 55275641  | chicken | 291521   | 11024724 |
| 7 | 7q11.21 | 66300365  | 7q11.23 | 75788139  | chicken | 9487774  | 1003668  |
| 7 | 7q11.23 | 76791807  | 7q21.1  | 83000325  | chicken | 6208518  | 206528   |
| 7 | 7q21.1  | 83206853  | 7q21.1  | 86473042  | chicken | 3266189  | 149970   |
| 7 | 7q21.1  | 86623012  | 7q21.3  | 96391869  | chicken | 9768857  | 851094   |
| 7 | 7q21.3  | 97242963  | 7q21.3  | 97594284  | chicken | 351321   | 675405   |
| 7 | 7q22    | 98269689  | 7q22    | 98701555  | chicken | 431866   | 1850294  |
| 7 | 7q22    | 100551849 | 7q22    | 101802475 | chicken | 1250626  | 0        |
| 7 | 7q22    | 101802475 | 7q31.1  | 107357576 | chicken | 5555101  | 24349    |
| 7 | 7q31.1  | 107381925 | 7q32    | 126771269 | chicken | 19389344 | 1666066  |
| 7 | 7q32    | 128437335 | 7q32    | 129759213 | chicken | 1321878  | 1109276  |
| 7 | 7q32    | 130868489 | 7q33    | 132174783 | chicken | 1306294  | 220116   |
| 7 | 7q33    | 132394899 | 7q33    | 133525046 | chicken | 1130147  | 278361   |
| 7 | 7q33    | 133803407 | 7q33    | 134112641 | chicken | 309234   | 46110    |
| 7 | 7q33    | 134158751 | 7q33    | 134790746 | chicken | 631995   | 25333    |
| 7 | 7q33    | 134816079 | 7q34    | 140903503 | chicken | 6087424  | 1010172  |
| 7 | 7q34    | 141913675 | 7q34    | 142725902 | chicken | 812227   | 1137961  |
| 7 | 7q35    | 143863863 | 7q36    | 148163633 | chicken | 4299770  | 2316405  |
| 7 | 7q36    | 150480038 | 7q36    | 158238099 | chicken | 7758061  |          |
| 8 | 8p23.3  | 1414919   | 8p23.1  | 6643537   | chicken | 5228618  | 2831468  |
| 8 | 8p23.1  | 9475005   | 8p23.1  | 9677262   | chicken | 202257   | 362736   |
| 8 | 8p23.1  | 10039998  | 8p23.1  | 11748385  | chicken | 1708387  | 1159588  |
| 8 | 8p22    | 12907973  | 8p22    | 17973193  | chicken | 5065220  | 5186875  |
| 8 | 8p21    | 23160068  | 8p21    | 25961234  | chicken | 2801166  | 2052006  |
| 8 | 8p21    | 28013240  | 8p12    | 29104530  | chicken | 1091290  | 3182138  |
| 8 | 8p12    | 32286668  | 8p12    | 32902572  | chicken | 615904   | 9802307  |
| 8 | 8p11.2  | 42704879  | 8p11.2  | 43060066  | chicken | 355187   | 5368218  |

|    |         |           |         |           |         |          |          |
|----|---------|-----------|---------|-----------|---------|----------|----------|
| 8  | 8q11.2  | 48428284  | 8q24.1  | 120187610 | chicken | 71759326 | 434183   |
| 8  | 8q24.1  | 120621793 | 8q24.3  | 144770093 | chicken | 24148300 |          |
| 9  | 9p24    | 4813532   | 9p24    | 8643415   | chicken | 3829883  | 3849796  |
| 9  | 9p23    | 12493211  | 9p23    | 12841201  | chicken | 347990   | 2601797  |
| 9  | 9p13    | 15442998  | 9p21    | 21049498  | chicken | 5606500  | 2216479  |
| 9  | 9p21    | 23265977  | 9p21    | 23928674  | chicken | 662697   | 12642988 |
| 9  | 9p13    | 36571662  | 9p13    | 37017964  | chicken | 446302   | 31690290 |
| 9  | 9q21.1  | 68708254  | 9q21.3  | 79748088  | chicken | 11039834 | 10937644 |
| 9  | 9q22.2  | 90685732  | 9q22.3  | 91715989  | chicken | 1030257  | 354828   |
| 9  | 9q22.3  | 92070817  | 9q22.3  | 92494637  | chicken | 423820   | 576042   |
| 9  | 9q22.3  | 93070679  | 9q22.3  | 94020993  | chicken | 950314   | 4108909  |
| 9  | 9q22.3  | 98129902  | 9q22.3  | 98419936  | chicken | 290034   | 407447   |
| 9  | 9q22.3  | 98827383  | 9q22.3  | 98995468  | chicken | 168085   | 23032    |
| 9  | 9q22.3  | 99018500  | 9q31    | 100292759 | chicken | 1274259  | 818574   |
| 9  | 9q31    | 101111333 | 9q31    | 101539322 | chicken | 427989   | 3496849  |
| 9  | 9q31    | 105036171 | 9q31    | 106891529 | chicken | 1855358  | 1085031  |
| 9  | 9q31    | 107976560 | 9q31    | 108258424 | chicken | 281864   | 616713   |
| 9  | 9q31    | 108875137 | 9q31    | 109310005 | chicken | 434868   | 265576   |
| 9  | 9q31    | 109575581 | 9q32    | 112732207 | chicken | 3156626  | 366723   |
| 9  | 9q32    | 113098930 | 9q32    | 113898629 | chicken | 799699   | 61473    |
| 9  | 9q32    | 113960102 | 9q33    | 120464612 | chicken | 6504510  | 175663   |
| 9  | 9q33    | 120640275 | 9q33    | 127235485 | chicken | 6595210  | 323538   |
| 9  | 9q34.1  | 127559023 | 9q34.3  | 136897210 | chicken | 9338187  | 29416    |
| 9  | 9q34.3  | 136926626 | 9q34.3  | 138311658 | chicken | 1385032  |          |
| 10 | 10p15   | 21542     | 10p15   | 4812889   | chicken | 4791347  | 592759   |
| 10 | 10p15   | 5405648   | 10p15   | 5971424   | chicken | 565776   | 1631228  |
| 10 | 10p14   | 7602652   | 10p13   | 14323662  | chicken | 6721010  | 1268497  |
| 10 | 10p13   | 15592159  | 10p11.2 | 37131882  | chicken | 21539723 | 5467967  |
| 10 | 10q11.2 | 42599849  | 10q11.2 | 43021605  | chicken | 421756   | 2168011  |
| 10 | 10q11.2 | 45189616  | 10q11.2 | 45479311  | chicken | 289695   | 3576776  |
| 10 | 10q11.2 | 49056087  | 10q11.2 | 50449782  | chicken | 1393695  | 39516    |
| 10 | 10q11.2 | 50489298  | 10q11.2 | 50758433  | chicken | 269135   | 2890357  |
| 10 | 10q21.1 | 53648790  | 10q21.1 | 54051981  | chicken | 403191   | 1183965  |
| 10 | 10q21.1 | 55235946  | 10q21.1 | 56015683  | chicken | 779737   | 3852489  |
| 10 | 10q21.1 | 59868172  | 10q21.1 | 60261224  | chicken | 393052   | 821042   |
| 10 | 10q21.2 | 61082266  | 10q21.3 | 68715724  | chicken | 7633458  | 632367   |
| 10 | 10q21.3 | 69348091  | 10q22.1 | 74576201  | chicken | 5228110  | 290173   |
| 10 | 10q22.2 | 74866374  | 10q22.3 | 80875574  | chicken | 6009200  | 1378821  |
| 10 | 10q22.3 | 82254395  | 10q22.3 | 82396943  | chicken | 142548   | 3494273  |
| 10 | 10q23.1 | 85891216  | 10q23.2 | 88940694  | chicken | 3049478  | 314348   |
| 10 | 10q23.3 | 89255042  | 10q23.3 | 89872817  | chicken | 617775   | 1080282  |
| 10 | 10q23.3 | 90953099  | 10q23.3 | 96285673  | chicken | 5332574  | 533476   |
| 10 | 10q23.3 | 96819149  | 10q24.1 | 97286106  | chicken | 466957   | 508019   |
| 10 | 10q24.1 | 97794125  | 10q24.1 | 98085815  | chicken | 291690   | 28548    |
| 10 | 10q24.1 | 98114363  | 10q24.1 | 98459744  | chicken | 345381   | 194450   |
| 10 | 10q24.1 | 98654194  | 10q24.2 | 101825872 | chicken | 3171678  | 199258   |
| 10 | 10q24.3 | 102025130 | 10q24.3 | 102632157 | chicken | 607027   | 33439    |
| 10 | 10q24.3 | 102665596 | 10q24.3 | 103900153 | chicken | 1234557  | 1844     |
| 10 | 10q24.3 | 103901997 | 10q24.3 | 104174942 | chicken | 272945   | 43847    |
| 10 | 10q24.3 | 104218789 | 10q26.1 | 125796126 | chicken | 21577337 | 3932971  |
| 10 | 10q26.2 | 129729097 | 10q26.3 | 134469962 | chicken | 4740865  |          |
| 11 | 11p15.5 | 194122    | 11p15.5 | 480528    | chicken | 286406   | 468888   |
| 11 | 11p15.5 | 949416    | 11p15.5 | 3108914   | chicken | 2159498  | 1236261  |
| 11 | 11p15.4 | 4345175   | 11p15.4 | 6619322   | chicken | 2274147  | 661506   |
| 11 | 11p15.4 | 7280828   | 11p15.4 | 7682866   | chicken | 402038   | 391926   |
| 11 | 11p15.4 | 8074792   | 11p15.2 | 13723547  | chicken | 5648755  | 130236   |
| 11 | 11p15.2 | 13853783  | 11p15.2 | 14246001  | chicken | 392218   | 9921     |
| 11 | 11p15.2 | 14255922  | 11p15.1 | 18722630  | chicken | 4466708  | 968074   |

|    |          |           |          |           |         |          |          |
|----|----------|-----------|----------|-----------|---------|----------|----------|
| 11 | 11p15.1  | 19690704  | 11p14    | 22806005  | chicken | 3115301  | 4287531  |
| 11 | 11p14    | 27093536  | 11p13    | 33662373  | chicken | 6568837  | 795812   |
| 11 | 11p13    | 34458185  | 11p11.12 | 47568862  | chicken | 13110677 | 1556022  |
| 11 | 11p11.12 | 49124884  | 11p11.12 | 49762223  | chicken | 637339   | 18119469 |
| 11 | 11q13.1  | 67881692  | 11q13.4  | 70536070  | chicken | 2654378  | 1689355  |
| 11 | 11q13.4  | 72225425  | 11q13.5  | 74955638  | chicken | 2730213  | 2361387  |
| 11 | 11q13.5  | 77317025  | 11q22.3  | 109984997 | chicken | 32667972 | 1220072  |
| 11 | 11q23    | 111205069 | 11q23    | 112813858 | chicken | 1608789  | 5688990  |
| 11 | 11q23    | 118502848 | 11q25    | 134035906 | chicken | 15533058 |          |
| 12 | 12p13.3  | 105031    | 12p13.3  | 2677452   | chicken | 2572421  | 12850562 |
| 12 | 12p12.3  | 15528014  | 12p11.2  | 27072760  | chicken | 11544746 | 687687   |
| 12 | 12p11.2  | 27760447  | 12p11.2  | 29012215  | chicken | 1251768  | 496476   |
| 12 | 12p11.2  | 29508691  | 12p11.2  | 32963699  | chicken | 3455008  | 6483571  |
| 12 | 12p12    | 39447270  | 12q13.1  | 45760489  | chicken | 6313219  | 10861318 |
| 12 | 12q14    | 56621807  | 12q23    | 100302277 | chicken | 43680470 | 69173    |
| 12 | 12q23    | 100371450 | 12q23    | 106679140 | chicken | 6307690  | 114065   |
| 12 | 12q23    | 106793205 | 12q24.1  | 111444658 | chicken | 4651453  | 646973   |
| 12 | 12q24.1  | 112091631 | 12q24.31 | 119917101 | chicken | 7825470  | 1845335  |
| 12 | 12q24.31 | 121762436 | 12q24.33 | 132074589 | chicken | 10312153 |          |
| 13 | 13q12.1  | 19457601  | 13q14.1  | 40296935  | chicken | 20839334 | 11841884 |
| 13 | 13q14.3  | 52138819  | 13q21.2  | 60886228  | chicken | 8747409  | 9417440  |
| 13 | 13q21.3  | 70303668  | 13q31    | 79413807  | chicken | 9110139  | 59500    |
| 13 | 13q31    | 79473307  | 13q31    | 80773032  | chicken | 1299725  | 4325654  |
| 13 | 13q31    | 85098686  | 13q31    | 85273279  | chicken | 174593   | 4777699  |
| 13 | 13q31    | 90050978  | 13q33    | 107431655 | chicken | 17380677 | 481752   |
| 13 | 13q33    | 107913407 | 13q34    | 114110259 | chicken | 6196852  |          |
| 14 | 14q12    | 25018730  | 14q21    | 38941572  | chicken | 13922842 | 34467339 |
| 14 | 14q24.3  | 73408911  | 14q32.3  | 104706611 | chicken | 31297700 | 0        |
| 14 | 14q32.3  | 104706611 | 14q32.3  | 105067346 | chicken | 360735   |          |
| 15 | 15q11.2  | 20384846  | 15q11.2  | 20613794  | chicken | 228948   | 2861491  |
| 15 | 15q12    | 23475285  | 15q13    | 26255370  | chicken | 2780085  | 1524203  |
| 15 | 15q13    | 27779573  | 15q13    | 29156503  | chicken | 1376930  | 1542958  |
| 15 | 15q13    | 30699461  | 15q15    | 38172249  | chicken | 7472788  | 76504    |
| 15 | 15q15    | 38248753  | 15q15    | 38858827  | chicken | 610074   | 65275    |
| 15 | 15q15    | 38924102  | 15q15    | 41264077  | chicken | 2339975  | 186219   |
| 15 | 15q15    | 41450296  | 15q21.1  | 42740113  | chicken | 1289817  | 379762   |
| 15 | 15q21.1  | 43119875  | 15q21.1  | 43354999  | chicken | 235124   | 458811   |
| 15 | 15q21.1  | 43813810  | 15q22.3  | 62063017  | chicken | 18249207 | 128798   |
| 15 | 15q22.3  | 62191815  | 15q22.3  | 62842540  | chicken | 650725   | 433033   |
| 15 | 15q22.3  | 63275573  | 15q23    | 68779125  | chicken | 5503552  | 132177   |
| 15 | 15q23    | 68911302  | 15q23    | 69862655  | chicken | 951353   | 23274    |
| 15 | 15q23    | 69885929  | 15q24    | 72881488  | chicken | 2995559  | 1052288  |
| 15 | 15q24    | 73933776  | 15q25    | 76714973  | chicken | 2781197  | 1176763  |
| 15 | 15q25    | 77891736  | 15q25    | 82586947  | chicken | 4695211  | 0        |
| 15 | 15q25    | 82586947  | 15q25    | 83289442  | chicken | 702495   | 588279   |
| 15 | 15q25    | 83877721  | 15q25    | 88047379  | chicken | 4169658  | 1048639  |
| 15 | 15q26.1  | 89096018  | 15q26.1  | 89297551  | chicken | 201533   | 270336   |
| 15 | 15q26.1  | 89567887  | 15q26.3  | 99902596  | chicken | 10334709 |          |
| 16 | 16p13.3  | 4653      | 16p13.3  | 367902    | chicken | 363249   | 20718    |
| 16 | 16p13.3  | 388620    | 16p13.3  | 713176    | chicken | 324556   | 0        |
| 16 | 16p13.3  | 713176    | 16p13.3  | 1211786   | chicken | 498610   | 280558   |
| 16 | 16p13.3  | 1492344   | 16p13.3  | 1690111   | chicken | 197767   | 107620   |
| 16 | 16p13.3  | 1797731   | 16p13.3  | 2227488   | chicken | 429757   | 1231838  |
| 16 | 16p13.3  | 3459326   | 16p13.3  | 4464150   | chicken | 1004824  | 373671   |
| 16 | 16p13.3  | 4837821   | 16p13.3  | 5087800   | chicken | 249979   | 1038960  |
| 16 | 16p13.3  | 6126760   | 16p13.1  | 11256892  | chicken | 5130132  | 1222141  |
| 16 | 16p13.1  | 12479033  | 16p13.1  | 14691984  | chicken | 2212951  | 890559   |
| 16 | 16p13.1  | 15582543  | 16p12    | 18845522  | chicken | 3262979  | 3069630  |

|    |          |          |         |          |         |          |          |
|----|----------|----------|---------|----------|---------|----------|----------|
| 16 | 16p12    | 21915152 | 16p12   | 27145727 | chicken | 5230575  | 1885920  |
| 16 | 16p11.2  | 29031647 | 16p11.2 | 29246265 | chicken | 214618   | 15925310 |
| 16 | 16q11.2  | 45171575 | 16q21   | 57104792 | chicken | 11933217 | 303422   |
| 16 | 16q21    | 57408214 | 16q22   | 65534181 | chicken | 8125967  | 89885    |
| 16 | 16q22    | 65624066 | 16q22   | 66963693 | chicken | 1339627  | 2008531  |
| 16 | 16q22    | 68972224 | 16q22   | 69877357 | chicken | 905133   | 3046599  |
| 16 | 16q22    | 72923956 | 16q23   | 73911511 | chicken | 987555   | 1962374  |
| 16 | 16q23    | 75873885 | 16q24   | 88314857 | chicken | 12440972 |          |
| 17 | 17p13    | 5979     | 17p13   | 2186447  | chicken | 2180468  | 25217    |
| 17 | 17p13    | 2211664  | 17p13   | 3582554  | chicken | 1370890  | 129729   |
| 17 | 17p13    | 3712283  | 17p13   | 4157201  | chicken | 444918   | 1300185  |
| 17 | 17p13    | 5457386  | 17p13   | 6237594  | chicken | 780208   | 1999135  |
| 17 | 17p13    | 8236729  | 17p12   | 15175628 | chicken | 6938899  | 643311   |
| 17 | 17p12    | 15818939 | 17p11.2 | 16277751 | chicken | 458812   | 0        |
| 17 | 17p11.2  | 16277751 | 17p11.2 | 21267116 | chicken | 4989365  | 1378363  |
| 17 | 17q11.2  | 22645479 | 17q11.2 | 23695741 | chicken | 1050262  | 3290     |
| 17 | 17q11.2  | 23699031 | 17q11.2 | 25877954 | chicken | 2178923  | 6045940  |
| 17 | 17q12    | 31923894 | 17q12   | 33224540 | chicken | 1300646  | 6865450  |
| 17 | 17q21.3  | 40089990 | 17q21.3 | 44844292 | chicken | 4754302  | 2216862  |
| 17 | 17q21.3  | 47061154 | 17q23   | 52438820 | chicken | 5377666  | 98824    |
| 17 | 17q23    | 52537644 | 17q23   | 57679550 | chicken | 5141906  | 158142   |
| 17 | 17q23    | 57837692 | 17q23   | 59250410 | chicken | 1412718  | 218263   |
| 17 | 17q23    | 59468673 | 17q24   | 60193977 | chicken | 725304   | 4181837  |
| 17 | 17q24    | 64375814 | 17q25   | 69567432 | chicken | 5191618  | 1546054  |
| 17 | 17q25    | 71113486 | 17q25   | 73615159 | chicken | 2501673  | 3870366  |
| 17 | 17q25    | 77485525 | 17q25   | 78451936 | chicken | 966411   |          |
| 18 | 18p11.32 | 106808   | 18p11.2 | 8396947  | chicken | 8290139  | 1585721  |
| 18 | 18p11.2  | 9982668  | 18p11.2 | 13880099 | chicken | 3897431  | 2903695  |
| 18 | 18q11.2  | 16783794 | 18q12.2 | 31002282 | chicken | 14218488 | 300149   |
| 18 | 18q12.2  | 31302431 | 18q12.2 | 32623593 | chicken | 1321162  | 1099712  |
| 18 | 18q12.2  | 33723305 | 12q12.2 | 35195192 | chicken | 1471887  | 4115861  |
| 18 | 18q12.3  | 39311053 | 18q21.1 | 43136264 | chicken | 3825211  | 477378   |
| 18 | 18q21.1  | 43613642 | 18q21.1 | 44010145 | chicken | 396503   | 12496724 |
| 18 | 18q21.3  | 56506869 | 18q22   | 59805496 | chicken | 3298627  | 60238    |
| 18 | 18q21.3  | 59865734 | 18q23   | 72873406 | chicken | 13007672 | 779134   |
| 18 | 18q23    | 73652540 | 18q23   | 75997696 | chicken | 2345156  |          |
| 19 | 19p13.3  | 258125   | 19p13.3 | 2259575  | chicken | 2001450  | 2343251  |
| 19 | 19p13.3  | 4602826  | 19p13.2 | 8669945  | chicken | 4067119  | 7369104  |
| 19 | 19p13.1  | 16039049 | 19p13.1 | 19477919 | chicken | 3438870  | 3008084  |
| 19 | 19p12    | 22486003 | 19p12   | 22589748 | chicken | 103745   | 11647335 |
| 19 | 19q12    | 34237083 | 19q13.1 | 39684108 | chicken | 5447025  | 3951242  |
| 19 | 19q13.2  | 43635350 | 19q13.2 | 43769906 | chicken | 134556   |          |
| 20 | 20p13    | 2915386  | 20p13   | 4178097  | chicken | 1262711  | 534339   |
| 20 | 20p13    | 4712436  | 20p12   | 5126548  | chicken | 414112   | 0        |
| 20 | 20p12    | 5126548  | 20p12   | 13746140 | chicken | 8619592  | 325824   |
| 20 | 20p12    | 14071964 | 20p12   | 16679764 | chicken | 2607800  | 3285075  |
| 20 | 20p11.2  | 19964839 | 20p11.2 | 22497809 | chicken | 2532970  | 2254333  |
| 20 | 20p11.2  | 24752142 | 20p11.2 | 25079253 | chicken | 327111   | 4454498  |
| 20 | 20q11.2  | 29533751 | 20q11.2 | 30901944 | chicken | 1368193  | 695381   |
| 20 | 20q11.2  | 31597325 | 20q11.2 | 34605332 | chicken | 3008007  | 1083835  |
| 20 | 20q11.2  | 35689167 | 20q11.2 | 36223597 | chicken | 534430   | 461761   |
| 20 | 20q11.2  | 36685358 | 20q12   | 39429119 | chicken | 2743761  | 5174543  |
| 20 | 20q13.1  | 44603662 | 20q13.1 | 47532990 | chicken | 2929328  | 149851   |
| 20 | 20q13.1  | 47682841 | 20q13.3 | 57203103 | chicken | 9520262  | 4447644  |
| 20 | 20q13.3  | 61650747 | 20q13.3 | 62375657 | chicken | 724910   |          |
| 21 | 21q11.2  | 14459219 | 21q22.3 | 44000557 | chicken | 29541338 | 2136985  |
| 21 | 21q22.3  | 46137542 | 21q22.3 | 46849606 | chicken | 712064   |          |
| 22 | 22q11.2  | 15953171 | 22q11.2 | 16988468 | chicken | 1035297  | 704316   |

|    |         |           |         |           |         |          |          |
|----|---------|-----------|---------|-----------|---------|----------|----------|
| 22 | 22q11.2 | 17692784  | 22q11.2 | 20654768  | chicken | 2961984  | 1107184  |
| 22 | 22q11.2 | 21761952  | 22q12.1 | 27778011  | chicken | 6016059  | 214578   |
| 22 | 22q12.2 | 27992589  | 22q12.3 | 30830867  | chicken | 2838278  | 277625   |
| 22 | 22q12.3 | 31108492  | 22q13.2 | 41335900  | chicken | 10227408 | 4375     |
| 22 | 22q13.2 | 41340275  | 22q13.3 | 44687806  | chicken | 3347531  | 821095   |
| 22 | 22q13.3 | 45508901  | 22q13.3 | 47541745  | chicken | 2032844  | 222886   |
| 22 | 22q13.3 | 47764631  | 22q13.3 | 48628371  | chicken | 863740   |          |
| X  | Xp22.33 | 147302    | Xp11.3  | 45492563  | chicken | 45345261 | 729748   |
| X  | Xp11.3  | 46222311  | Xp11.3  | 46708676  | chicken | 486365   | 7282092  |
| X  | Xq11.2  | 53990768  | Xq11.2  | 54220775  | chicken | 230007   | 8417082  |
| X  | Xq11.2  | 62637857  | Xq11.2  | 62895349  | chicken | 257492   | 6111894  |
| X  | Xq13.1  | 69007243  | Xq13.1  | 70577663  | chicken | 1570420  | 2946159  |
| X  | Xq13.2  | 73523822  | Xq21.1  | 77188027  | chicken | 3664205  | 621222   |
| X  | Xq21.1  | 77809249  | Xq21.1  | 78851521  | chicken | 1042272  | 1286855  |
| X  | Xq21.1  | 80138376  | Xq22.1  | 99990589  | chicken | 19852213 | 3226615  |
| X  | Xq22.2  | 103217204 | Xq22.3  | 105923657 | chicken | 2706453  | 3129071  |
| X  | Xq23    | 109052728 | Xq23    | 111469562 | chicken | 2416834  | 6424531  |
| X  | Xq24    | 117894093 | Xq25    | 128378662 | chicken | 10484569 | 2535504  |
| X  | Xq26.2  | 130914166 | Xq26.3  | 137667500 | chicken | 6753334  | 1223458  |
| X  | Xq27.1  | 138890958 | Xq27.2  | 140619971 | chicken | 1729013  | 6088592  |
| X  | Xq27.3  | 146708563 | Xq28    | 149826349 | chicken | 3117786  |          |
| 1  | 1p36.33 | 885422    | 1p36.22 | 10382321  | dog     | 9496899  | 11278    |
| 1  | 1p36.22 | 10393599  | 1p35.1  | 33641688  | dog     | 23248089 | 6656     |
| 1  | 1p35.1  | 33648344  | 1p34.2  | 43218471  | dog     | 9570127  | 60369    |
| 1  | 1p34.2  | 43278840  | 1p32.3  | 53002763  | dog     | 9723923  | 870      |
| 1  | 1p32.3  | 53003633  | 1p31.2  | 67643657  | dog     | 14640024 | 1        |
| 1  | 1p31.2  | 67643658  | 1p13.2  | 111718814 | dog     | 44075156 | 3899     |
| 1  | 1p13.2  | 111722713 | 1p13.2  | 113947730 | dog     | 2225017  | 855      |
| 1  | 1p13.2  | 113948585 | 1p11.2  | 120409185 | dog     | 6460600  | 23386096 |
| 1  | 1q21.1  | 143795281 | 1q21.3  | 150079679 | dog     | 6284398  | 58459    |
| 1  | 1q21.3  | 150138138 | 1q23.1  | 154730542 | dog     | 4592404  | 8797840  |
| 1  | 1q24.1  | 163528382 | 1q25.2  | 176541386 | dog     | 13013004 | 17135974 |
| 1  | 1q31.3  | 193677360 | 1q32.1  | 199920606 | dog     | 6243246  | 12048    |
| 1  | 1q32.1  | 199932654 | 1q32.1  | 203176244 | dog     | 3243590  | 18428    |
| 1  | 1q32.1  | 203194672 | 1q41    | 212088558 | dog     | 8893886  | 24449519 |
| 1  | 1q43    | 236538077 | 1q44    | 243460072 | dog     | 6921995  | 313942   |
| 1  | 1q44    | 243774014 | 1q44    | 244065183 | dog     | 291169   | 262817   |
| 1  | 1q44    | 244328000 | 1q44    | 245065271 | dog     | 737271   | 241224   |
| 1  | 1q44    | 245306495 | 1q44    | 245422849 | dog     | 116354   |          |
| 2  | 2p25.3  | 3575      | 2p21    | 42896353  | dog     | 42892778 | 2658     |
| 2  | 2p21    | 42899011  | 2p13.3  | 71199984  | dog     | 28300973 | 1        |
| 2  | 2p13.3  | 71199985  | 2p11.2  | 89446527  | dog     | 18246542 | 5617505  |
| 2  | 2q11.2  | 95064032  | 2q11.2  | 96656378  | dog     | 1592346  | 22967    |
| 2  | 2q11.2  | 96679345  | 2q13    | 109821753 | dog     | 13142408 | 356240   |
| 2  | 2q13    | 110177993 | 2q13    | 113855973 | dog     | 3677980  | 28159    |
| 2  | 2q13    | 113884132 | 2q14.1  | 114038202 | dog     | 154070   | 107764   |
| 2  | 2q14.1  | 114145966 | 2q21.1  | 130390523 | dog     | 16244557 | 921035   |
| 2  | 2q21.1  | 131311558 | 2q21.1  | 131747793 | dog     | 436235   | 690920   |
| 2  | 2q21.2  | 132438713 | 2q21.2  | 132599047 | dog     | 160334   | 373060   |
| 2  | 2q21.2  | 132972107 | 2q23.3  | 153457546 | dog     | 20485439 | 204019   |
| 2  | 2q23.3  | 153661565 | 2q32.2  | 190041649 | dog     | 36380084 | 90013    |
| 2  | 2q32.2  | 190131662 | 2q36.2  | 225096837 | dog     | 34965175 | 521      |
| 2  | 2q36.2  | 225097358 | 2q37.3  | 242478402 | dog     | 17381044 |          |
| 3  | 3p26    | 35001     | 3p25.2  | 12872767  | dog     | 12837766 | 36806    |
| 3  | 3p25.2  | 12909573  | 3p25.1  | 15138279  | dog     | 2228706  | 24660    |
| 3  | 3p25.1  | 15162939  | 3p23    | 32673929  | dog     | 17510990 | 1415     |
| 3  | 3p23    | 32675344  | 3p21.3  | 44600317  | dog     | 11924973 | 119075   |
| 3  | 3p21.3  | 44719392  | 3p12.3  | 75411831  | dog     | 30692439 | 0        |

|    |         |           |         |           |     |          |          |
|----|---------|-----------|---------|-----------|-----|----------|----------|
| 3  | 3p12.3  | 75411831  | 3p12.3  | 75722985  | dog | 311154   | 221937   |
| 3  | 3p12.3  | 75944922  | 3p12.2  | 80346955  | dog | 4402033  | 51067370 |
| 3  | 3q21.3  | 131414325 | 3q25.32 | 159979299 | dog | 28564974 | 12       |
| 3  | 3q25.32 | 159979311 | 3q26.32 | 180198708 | dog | 20219397 | 15698    |
| 3  | 3q26.32 | 180214406 | 3q29    | 194780147 | dog | 14565741 | 180      |
| 3  | 3q29    | 194780327 | 3q29    | 195495418 | dog | 715091   | 43511    |
| 3  | 3q29    | 195538929 | 3q29    | 199260422 | dog | 3721493  |          |
| 4  | 4p16.3  | 482856    | 4p16.3  | 1231195   | dog | 748339   | 41492    |
| 4  | 4p16.3  | 1272687   | 4p16.3  | 3919912   | dog | 2647225  | 135125   |
| 4  | 4p16.3  | 4055037   | 4p16.3  | 4238573   | dog | 183536   | 63676    |
| 4  | 4p16.3  | 4302249   | 4p16.1  | 6333095   | dog | 2030846  | 106714   |
| 4  | 4p16.1  | 6439809   | 4p16.1  | 8850821   | dog | 2411012  | 348513   |
| 4  | 4p16.1  | 9199334   | 4p16.1  | 9388939   | dog | 189605   | 52072    |
| 4  | 4p16.1  | 9441011   | 4p15.3  | 17436502  | dog | 7995491  | 1        |
| 4  | 4p15.3  | 17436503  | 4p13    | 41164479  | dog | 23727976 | 1940     |
| 4  | 4p13    | 41166419  | 4p12    | 48924940  | dog | 7758521  | 3604885  |
| 4  | 4q12    | 52529825  | 4q13.3  | 75714013  | dog | 23184188 | 269563   |
| 4  | 4q13.3  | 75983576  | 4q21.1  | 76653750  | dog | 670174   | 98145    |
| 4  | 4q21.1  | 76751895  | 4q27    | 121350309 | dog | 44598414 | 324      |
| 4  | 4q27    | 121350633 | 4q31.21 | 144761733 | dog | 23411100 | 24382    |
| 4  | 4q31.21 | 144786115 | 4q32.3  | 169618366 | dog | 24832251 | 105297   |
| 4  | 4q32.3  | 169723663 | 4q34.2  | 176804918 | dog | 7081255  | 12029    |
| 4  | 4q34.2  | 176816947 | 4q35.2  | 191268547 | dog | 14451600 |          |
| 5  | 5p15.3  | 134661    | 15p15.2 | 14749628  | dog | 14614967 | 199695   |
| 5  | 15p15.2 | 14949323  | 5p12    | 45939847  | dog | 30990524 | 3665710  |
| 5  | 5q11.2  | 49605557  | 5q11.2  | 54374852  | dog | 4769295  | 93251539 |
| 5  | 5q32    | 147626391 | 5q35.3  | 176931766 | dog | 29305375 | 491250   |
| 5  | 5q35.3  | 177423016 | 5q35.3  | 180031037 | dog | 2608021  |          |
| 6  | 6p25.3  | 126289    | 6p22.1  | 29757150  | dog | 29630861 | 372371   |
| 6  | 6p21.33 | 30129521  | 6p21.33 | 30289669  | dog | 160148   | 110234   |
| 6  | 6p21.33 | 30399903  | 6p11.2  | 58195618  | dog | 27795715 | 3829438  |
| 6  | 6q12    | 62025056  | 6q22.3  | 116717761 | dog | 54692705 | 850      |
| 6  | 6q22.3  | 116718611 | 6q23.2  | 131729655 | dog | 15011044 | 166104   |
| 6  | 6q23.2  | 131895759 | 6q23.2  | 132113394 | dog | 217635   | 1        |
| 6  | 6q23.2  | 132113395 | 6q23.2  | 132280804 | dog | 167409   | 4831     |
| 6  | 6q23.2  | 132285635 | 6q27    | 169912904 | dog | 37627269 | 7215     |
| 6  | 6q27    | 169920119 | 6q27    | 170811514 | dog | 891395   |          |
| 7  | 7p22    | 1122707   | 7p22    | 6520044   | dog | 5397337  | 293054   |
| 7  | 7p22    | 6813098   | 7p14.3  | 37558287  | dog | 30745189 | 70216477 |
| 7  | 7q31.1  | 107774764 | 7q31.32 | 122749795 | dog | 14975031 | 20421    |
| 7  | 7q31.32 | 122770216 | 7q33    | 133750212 | dog | 10979996 | 7535     |
| 7  | 7q33    | 133757747 | 7q34    | 137385080 | dog | 3627333  | 183249   |
| 7  | 7q34    | 137568329 | 7q36.1  | 148170205 | dog | 10601876 | 27876    |
| 7  | 7q36.1  | 148198081 | 7q36.3  | 158618905 | dog | 10420824 |          |
| 8  | 8p23.3  | 171204    | 8p23.3  | 458855    | dog | 287651   | 13919    |
| 8  | 8p23.3  | 472774    | 8p23.3  | 1736205   | dog | 1263431  | 368003   |
| 8  | 8p23.3  | 2104208   | 8p23.1  | 7404055   | dog | 5299847  | 736722   |
| 8  | 8p23.1  | 8140777   | 8p23.1  | 9690212   | dog | 1549435  | 19552028 |
| 8  | 8p12    | 29242240  | 8p11.2  | 43178734  | dog | 13936494 | 5154974  |
| 8  | 8q11.2  | 48333708  | 8q11.2  | 48819182  | dog | 485474   | 27873    |
| 8  | 8q11.2  | 48847055  | 8q22.1  | 98817981  | dog | 49970926 | 13954    |
| 8  | 8q22.1  | 98831935  | 8q24.3  | 146199185 | dog | 47367250 |          |
| 9  | 9p24    | 41356     | 9p24    | 5843772   | dog | 5802416  | 33936    |
| 9  | 9p24    | 5877708   | 9p13    | 38462144  | dog | 32584436 | 58655001 |
| 9  | 9q22.3  | 97117145  | 9q33.2  | 121295766 | dog | 24178621 | 2        |
| 9  | 9q33.2  | 121295768 | 9q34.3  | 138294946 | dog | 16999178 |          |
| 10 | 10p15   | 12916     | 10p12.3 | 19023073  | dog | 19010157 | 8411949  |
| 10 | 10p12.1 | 27435022  | 10p12.1 | 27658010  | dog | 222988   | 2118475  |

|    |          |           |          |           |     |          |          |
|----|----------|-----------|----------|-----------|-----|----------|----------|
| 10 | 10p11.23 | 29776485  | 10p11.21 | 37137798  | dog | 7361313  | 91974    |
| 10 | 10p11.21 | 37229772  | 10p11.21 | 37442197  | dog | 212425   | 12634    |
| 10 | 10p11.21 | 37454831  | 10p11.21 | 37575497  | dog | 120666   | 574616   |
| 10 | 10p11.21 | 38150113  | 10p11.21 | 38450766  | dog | 300653   | 109704   |
| 10 | 10p11.21 | 38560470  | 10p11.21 | 38677520  | dog | 117050   | 3906045  |
| 10 | 10q11.21 | 42583565  | 10q11.22 | 46102264  | dog | 3518699  | 181255   |
| 10 | 10q11.22 | 46283519  | 10q11.22 | 46594244  | dog | 310725   | 1343586  |
| 10 | 10q11.22 | 47937830  | 10q11.22 | 48232895  | dog | 295065   | 107062   |
| 10 | 10q11.22 | 48339957  | 10q11.23 | 50801571  | dog | 2461614  | 40320253 |
| 10 | 10q23.3  | 91121824  | 10q26.3  | 132784264 | dog | 41662440 |          |
| 11 | 11p15.5  | 182148    | 11p15.5  | 783824    | dog | 601676   | 3330     |
| 11 | 11p15.5  | 787154    | 11p15.4  | 3226658   | dog | 2439504  | 152670   |
| 11 | 11p15.4  | 3379328   | 11p15.4  | 3569927   | dog | 190599   | 12165    |
| 11 | 11p15.4  | 3582092   | 11p14    | 30237414  | dog | 26655322 | 10245    |
| 11 | 11p14    | 30247659  | 11p11.2  | 44035700  | dog | 13788041 | 712      |
| 11 | 11p11.2  | 44036412  | 11p11.2  | 48505093  | dog | 4468681  | 6621097  |
| 11 | 11q12.1  | 55126190  | 11q12.1  | 59275943  | dog | 4149753  | 15378    |
| 11 | 11q12.1  | 59291321  | 11q12.2  | 60003192  | dog | 711871   | 33477    |
| 11 | 11q12.2  | 60036669  | 11q13.4  | 70893857  | dog | 10857188 | 123395   |
| 11 | 11q13.4  | 71017252  | 11q13.4  | 71193468  | dog | 176216   | 110823   |
| 11 | 11q13.4  | 71304291  | 11q22.1  | 100814003 | dog | 29509712 | 13811    |
| 11 | 11q22.1  | 100827814 | 11q25    | 134394148 | dog | 33566334 |          |
| 12 | 12p13.3  | 17706     | 12p13.3  | 2723684   | dog | 2705978  | 6696     |
| 12 | 12p13.3  | 2730380   | 12q13.2  | 54012775  | dog | 51282395 | 274988   |
| 12 | 12q13.2  | 54287763  | 12q21.1  | 74177243  | dog | 19889480 | 1        |
| 12 | 12q21.1  | 74177244  | 12q23.3  | 103086679 | dog | 28909435 | 16244    |
| 12 | 12q23.3  | 103102923 | 12q23.3  | 106684856 | dog | 3581933  | 129231   |
| 12 | 12q23.3  | 106814087 | 12q24.11 | 108949566 | dog | 2135479  | 1925     |
| 12 | 12q24.11 | 108951491 | 12q24.33 | 132389811 | dog | 23438320 |          |
| 13 | 13q12.11 | 18820724  | 13q14.11 | 40332943  | dog | 21512219 | 32300    |
| 13 | 13q14.11 | 40365243  | 13q14.3  | 51584594  | dog | 11219351 | 84623    |
| 13 | 13q14.3  | 51669217  | 13q14.3  | 52111818  | dog | 442601   | 1486     |
| 13 | 13q14.3  | 52113304  | 13q34    | 114112545 | dog | 61999241 |          |
| 14 | 14q11.2  | 19712896  | 14q11.2  | 21253497  | dog | 1540601  | 142421   |
| 14 | 14q11.2  | 21395918  | 14q32.3  | 105451370 | dog | 84055452 |          |
| 15 | 15q11.2  | 19763721  | 15q11.2  | 19915888  | dog | 152167   | 468909   |
| 15 | 15q11.2  | 20384797  | 15q11.2  | 20945083  | dog | 560286   | 400571   |
| 15 | 15q11.2  | 21345654  | 15q13.1  | 26256384  | dog | 4910730  | 361826   |
| 15 | 15q11.2  | 26618210  | 15q13.1  | 26726450  | dog | 108240   | 270299   |
| 15 | 15q13.1  | 26996749  | 15q13.3  | 30410087  | dog | 3413338  | 279638   |
| 15 | 15q13.1  | 30689725  | 15q24.2  | 73815789  | dog | 43126064 | 97551    |
| 15 | 15q13.3  | 73913340  | 15q24.3  | 75985591  | dog | 2072251  | 64226    |
| 15 | 15q24.2  | 76049817  | 15q25.1  | 76479556  | dog | 429739   | 34035    |
| 15 | 15q24.3  | 76513591  | 15q25.1  | 76788398  | dog | 274807   | 42384    |
| 15 | 15q25.1  | 76830782  | 15q25.2  | 80366675  | dog | 3535893  | 8293631  |
| 15 | 15q25.1  | 88660306  | 15q26.1  | 89369223  | dog | 708917   | 23782    |
| 15 | 15q26.1  | 89393005  | 15q26.3  | 100084049 | dog | 10691044 | 74743    |
| 15 | 15q26.1  | 100158792 | 15q26.3  | 100307935 | dog | 149143   |          |
| 16 | 16p13.3  | 15856     | 16p11.2  | 28521388  | dog | 28505532 | 100020   |
| 16 | 16p11.2  | 28621408  | 16p11.2  | 28953950  | dog | 332542   | 73013    |
| 16 | 16p11.2  | 29026963  | 16p11.2  | 29252547  | dog | 225584   | 308793   |
| 16 | 16p11.2  | 29561340  | 16p11.2  | 31448482  | dog | 1887142  | 13721306 |
| 16 | 16q11.2  | 45169788  | 16q12.1  | 45539453  | dog | 369665   | 4553     |
| 16 | 16q12.1  | 45544006  | 16q21    | 57366106  | dog | 11822100 | 40545    |
| 16 | 16q21    | 57406651  | 16q22.1  | 68534470  | dog | 11127819 | 4401401  |
| 16 | 16q22.1  | 72935871  | 16q24.3  | 88663224  | dog | 15727353 |          |
| 17 | 17p13.3  | 2         | 17p13.3  | 1184941   | dog | 1184939  | 6181     |
| 17 | 17p13.3  | 1191122   | 17p13.2  | 3767755   | dog | 2576633  | 85992    |

|    |          |           |          |           |       |           |          |
|----|----------|-----------|----------|-----------|-------|-----------|----------|
| 17 | 17p13.2  | 3853747   | 17p12    | 15568027  | dog   | 11714280  | 5243527  |
| 17 | 17p11.2  | 20811554  | 17p11.2  | 21281418  | dog   | 469864    | 1268298  |
| 17 | 17q11.2  | 22549716  | 17q12    | 31512484  | dog   | 8962768   | 2092523  |
| 17 | 17q12    | 33605007  | 17q21.32 | 42484284  | dog   | 8879277   | 15246327 |
| 17 | 17q23.3  | 57730611  | 17q24.1  | 60190842  | dog   | 2460231   | 3536159  |
| 17 | 17q24.2  | 63727001  | 17q24.3  | 65862760  | dog   | 2135759   | 23233    |
| 17 | 17q24.3  | 65885993  | 17q25.3  | 77869187  | dog   | 11983194  |          |
| 18 | 18p11.32 | 102544    | 18p11.21 | 13122946  | dog   | 13020402  | 30951    |
| 18 | 18p11.21 | 13153897  | 18p11.21 | 14020900  | dog   | 867003    | 986316   |
| 18 | 18p11.21 | 15007216  | 18p11.21 | 15152965  | dog   | 145749    | 1621374  |
| 18 | 18q11.2  | 16774339  | 18q21.1  | 43823147  | dog   | 27048808  | 1        |
| 18 | 18q21.1  | 43823148  | 18q21.1  | 46143061  | dog   | 2319913   | 417467   |
| 18 | 18q21.1  | 46560528  | 18q23    | 76109129  | dog   | 29548601  |          |
| 19 | 19p13.3  | 228639    | 19p13.11 | 19638900  | dog   | 19410261  | 13707199 |
| 19 | 19q12    | 33346099  | 19q13.43 | 63788597  | dog   | 30442498  |          |
| 20 | 20p13    | 15908     | 20p11.2  | 23470914  | dog   | 23455006  | 408077   |
| 20 | 20p11.2  | 23878991  | 20p11.2  | 25553589  | dog   | 1674598   | 3743412  |
| 20 | 20q11.2  | 29297001  | 20q13.3  | 62378111  | dog   | 33081110  |          |
| 21 | 21q11.2  | 13449523  | 21q11.2  | 13636377  | dog   | 186854    | 764242   |
| 21 | 21q11.2  | 14400619  | 21q22.3  | 45632833  | dog   | 31232214  |          |
| 22 | 22q11.21 | 15920299  | 22q11.21 | 17035708  | dog   | 1115409   | 349053   |
| 22 | 22q11.21 | 17384761  | 22q11.21 | 18719485  | dog   | 1334724   | 3536368  |
| 22 | 22q11.21 | 22255853  | 22q11.21 | 23363676  | dog   | 1107823   | 180810   |
| 22 | 22q11.21 | 23544486  | 22q12.3  | 30977686  | dog   | 7433200   | 130187   |
| 22 | 22q12.3  | 31107873  | 22q13.33 | 49510847  | dog   | 18402974  |          |
| X  | Xp22.33  | 368307    | Xp11.22  | 56727470  | dog   | 56359163  | 5827587  |
| X  | Xq11.2   | 62555057  | Xq11.2   | 63440737  | dog   | 885680    | 475973   |
| X  | Xq11.2   | 63916710  | Xq21.3   | 86731882  | dog   | 22815172  | 3579966  |
| X  | Xq21.3   | 90311848  | Xq28     | 154807256 | dog   | 64495408  |          |
| 1  | 1p36.2   | 10068551  | 1p35     | 32572749  | horse | 22504198  | 53890126 |
| 1  | 1p22     | 86462875  | 1q21     | 152049085 | horse | 65586210  | 18404729 |
| 1  | 1q25     | 170453814 | 1q31     | 183169411 | horse | 12715597  | 20414952 |
| 1  | 1q32     | 203584363 | 1q32     | 203589226 | horse | 4863      | 11533901 |
| 1  | 1q41     | 215123127 | 1q41     | 215219029 | horse | 95902     | 25999442 |
| 1  | 1q44     | 241218471 | 1q44     | 241229338 | horse | 10867     |          |
| 2  | 2p25.1   | 10585428  | 2q24.2   | 119512573 | horse | 108927145 | 8568380  |
| 2  | 2q14.3   | 128080953 | 2q33     | 204564411 | horse | 76483458  | 5844014  |
| 2  | 2q34     | 210408425 | 2q37.1   | 233374445 | horse | 22966020  |          |
| 3  | 3p24     | 25318809  | 3p21.2   | 52452269  | horse | 27133460  | 50197251 |
| 3  | 3q12     | 102649520 | 3q12     | 102677146 | horse | 27626     | 23053739 |
| 3  | 3q21     | 125730885 | 3q23     | 143000800 | horse | 17269915  | 7172192  |
| 3  | 3q24     | 150172992 | 3q25     | 153458727 | horse | 3285735   | 17627898 |
| 3  | 3q26.2   | 171086625 | 3q26.2   | 171114157 | horse | 27532     | 16723161 |
| 3  | 3q27     | 187837318 | 3q27     | 188790133 | horse | 952815    |          |
| 4  | 4p14     | 41108850  | 4q23     | 100666682 | horse | 59557832  | 23099442 |
| 4  | 4q27     | 123766124 | 4q31.2   | 144940754 | horse | 21174630  | 11050720 |
| 4  | 4q31.3   | 155991474 | 4q31.3   | 155999990 | horse | 8516      | 31771867 |
| 4  | 4q35     | 187771857 | 4q35     | 187794384 | horse | 22527     |          |
| 5  | 5p15.1   | 17250628  | 5q12     | 64853897  | horse | 47603269  | 9165843  |
| 5  | 5q13.3   | 74019740  | 5q35     | 179222232 | horse | 105202492 |          |
| 6  | 6p25     | 6134315   | 6p24     | 12359335  | horse | 6225020   | 20251584 |
| 6  | 6p21.3   | 32610919  | 6q13     | 70962931  | horse | 38352012  | 12908481 |
| 6  | 6q14     | 83871412  | 6q15     | 90534306  | horse | 6662894   | 20661883 |
| 6  | 6q21     | 111196189 | 6q23.3   | 137170189 | horse | 25974000  | 12855833 |
| 6  | 6q25.1   | 150026022 | 6q26     | 161007766 | horse | 10981744  |          |
| 7  | 7p14     | 37906259  | 7p13     | 43935802  | horse | 6029543   | 20887689 |
| 7  | 7q11.21  | 64823491  | 7q11.23  | 72881325  | horse | 8057834   | 3883768  |
| 7  | 7q11.23  | 76765093  | 7q21.1   | 80146916  | horse | 3381823   | 13506426 |



|    |          |           |          |           |       |           |          |
|----|----------|-----------|----------|-----------|-------|-----------|----------|
| 7  | 7q21.3   | 93653342  | 7q36     | 154560138 | horse | 60906796  |          |
| 8  | 8p21     | 19606081  | 8p21     | 23361090  | horse | 3755009   | 3914964  |
| 8  | 8p21     | 27276054  | 8p21     | 27292752  | horse | 16698     | 74587198 |
| 8  | 8q22.2   | 101879950 | 8q24.2   | 133818041 | horse | 31938091  |          |
| 9  | 9p24     | 2612134   | 9p23     | 12700257  | horse | 10088123  | 8366848  |
| 9  | 9p21     | 21067105  | 9p13     | 34627730  | horse | 13560625  | 34457977 |
| 9  | 9q21.1   | 69085707  | 9q21.2   | 75910531  | horse | 6824824   | 8685950  |
| 9  | 9q21.3   | 84596481  | 9q21.3   | 84645218  | horse | 48737     | 21818531 |
| 9  | 9q31     | 106463749 | 9q33     | 127083179 | horse | 20619430  |          |
| 10 | 10p15    | 5236818   | 10p15    | 5250109   | horse | 13291     | 12171427 |
| 10 | 10p12.3  | 17421536  | 10p12.3  | 17429831  | horse | 8295      | 10204553 |
| 10 | 10p12.1  | 27634384  | 10p12.1  | 27657250  | horse | 22866     | 15713960 |
| 10 | 10q11.2  | 43371210  | 10q22.2  | 75569689  | horse | 32198479  | 56294597 |
| 10 | 10q26.3  | 131864286 | 10q26.3  | 131912390 | horse | 48104     |          |
| 11 | 11p15.5  | 2113209   | 11p15.5  | 2119251   | horse | 6042      | 3086512  |
| 11 | 11p15.4  | 5205763   | 11p13    | 31871919  | horse | 26666156  | 28235152 |
| 11 | 11q12    | 60107071  | 11q13.2  | 67303886  | horse | 7196815   | 33640038 |
| 11 | 11q22.1  | 100943924 | 11q23    | 119327766 | horse | 18383842  |          |
| 12 | 12p13.3  | 5937407   | 12q13.1  | 48256634  | horse | 42319227  | 7808001  |
| 12 | 12q13.3  | 56064635  | 12q15    | 68270233  | horse | 12205598  | 20553311 |
| 12 | 12q21.3  | 88823544  | 12q23    | 102807288 | horse | 13983744  | 6042015  |
| 12 | 12q24.1  | 108849303 | 12q24.31 | 122819896 | horse | 13970593  | 10662282 |
| 12 | 12q24.33 | 133482178 | 12q24.33 | 133514783 | horse | 32605     |          |
| 13 | 13q12.1  | 19462922  | 13q14.1  | 39302438  | horse | 19839516  | 1269894  |
| 13 | 13q14.1  | 40572332  | 13q14.3  | 51961371  | horse | 11389039  | 5181209  |
| 13 | 13q21.1  | 57142580  | 13q34    | 114059928 | horse | 56917348  |          |
| 14 | 14q11.2  | 18927692  | 14q11.2  | 22967584  | horse | 4039892   | 37184951 |
| 14 | 14q23    | 60152535  | 14q32.1  | 92844981  | horse | 32692446  |          |
| 15 | 15q13    | 27572439  | 15q13    | 27694790  | horse | 122351    | 22489657 |
| 15 | 15q21.1  | 50184447  | 15q24    | 72624862  | horse | 22440415  | 16374255 |
| 15 | 15q26.1  | 88999117  | 15q26.3  | 97094240  | horse | 8095123   |          |
| 16 | 16p13.3  | 166984    | 16p13.1  | 11341617  | horse | 11174633  | 35893932 |
| 16 | 16q12.1  | 47235549  | 16q24    | 89688683  | horse | 42453134  |          |
| 17 | 17p13    | 854103    | 17p13    | 9751740   | horse | 8897637   | 19520520 |
| 17 | 17q12    | 29272260  | 17q12    | 30546178  | horse | 1273918   | 15082665 |
| 17 | 17q21.3  | 45628843  | 17q21.3  | 45643124  | horse | 14281     | 14721779 |
| 17 | 17q24    | 60364903  | 17q24    | 62391090  | horse | 2026187   | 522189   |
| 17 | 17q24    | 62913279  | 17q25    | 80590141  | horse | 17676862  |          |
| 18 | 18p11.32 | 647622    | 18p11.2  | 9944825   | horse | 9297203   | 11212935 |
| 18 | 18q11.2  | 21157760  | 18q12.1  | 28569959  | horse | 7412199   | 15999449 |
| 18 | 18q21.1  | 44569408  | 18q21.3  | 55074637  | horse | 10505229  | 19650849 |
| 18 | 18q23    | 74725486  | 18q23    | 74743843  | horse | 18357     |          |
| 19 | 19p13.3  | 6617877   | 19p13.2  | 11088048  | horse | 4470171   | 27287570 |
| 19 | 19q13.1  | 38375618  | 19q13.3  | 50502183  | horse | 12126565  |          |
| 20 | 20p13    | 1297622   | 20p11.2  | 23350093  | horse | 22052471  | 9314345  |
| 20 | 20q11.2  | 32664438  | 20q13.3  | 62172325  | horse | 29507887  |          |
| 21 | 21q22.1  | 31105460  | 21q22.3  | 43486924  | horse | 12381464  |          |
| 22 | 22q11.2  | 20246572  | 22q12.2  | 30000274  | horse | 9753702   | 1579608  |
| 22 | 22q12.3  | 31579882  | 22q13.3  | 49198966  | horse | 17619084  |          |
| X  | Xp22.33  | 1291158   | Xq23     | 113607456 | horse | 112316298 | 1399757  |
| X  | Xq23     | 115007213 | Xq24     | 117578597 | horse | 2571384   | 2691761  |
| X  | Xq24     | 120270358 | Xq28     | 152547026 | horse | 32276668  |          |
| 1  | 1p36.3   | 1008947   | 1p32     | 58369551  | mouse | 57360604  | 108508   |
| 1  | 1p32     | 58478059  | 1p31.2   | 66969862  | mouse | 8491803   | 978120   |
| 1  | 1p31.2   | 67947982  | 1p22     | 89101147  | mouse | 21153165  | 200      |
| 1  | 1p22     | 89101347  | 1p22     | 93175140  | mouse | 4073793   | 87730    |
| 1  | 1p22     | 93262870  | 1q23     | 154874654 | mouse | 61611784  | 425434   |
| 1  | 1q23     | 155300088 | 1q32     | 204164021 | mouse | 48863933  | 55557    |

|   |        |           |        |           |       |          |         |
|---|--------|-----------|--------|-----------|-------|----------|---------|
| 1 | 1q32   | 204219578 | 1q42   | 220829162 | mouse | 16609584 | 200     |
| 1 | 1q42   | 220829362 | 1q42   | 222368518 | mouse | 1539156  | 49188   |
| 1 | 1q42   | 222417706 | 1q42   | 224030267 | mouse | 1612561  | 1205385 |
| 1 | 1q42   | 225235652 | 1q42   | 231615019 | mouse | 6379367  | 20039   |
| 1 | 1q42   | 231635058 | 1q43   | 236366875 | mouse | 4731817  | 151015  |
| 1 | 1q43   | 236517890 | 1q44   | 243221610 | mouse | 6703720  |         |
| 2 | 2p25.3 | 23769     | 2p25.3 | 1581123   | mouse | 1557354  | 144319  |
| 2 | 2p25.3 | 1725442   | 2p25.3 | 3119186   | mouse | 1393744  | 115846  |
| 2 | 2p25.3 | 3235032   | 2p23   | 26308539  | mouse | 23073507 | 45255   |
| 2 | 2p23   | 26353794  | 2p23   | 28962129  | mouse | 2608335  | 31802   |
| 2 | 2p23   | 28993931  | 2p16   | 53300424  | mouse | 24306493 | 545354  |
| 2 | 2p16   | 53845778  | 2p13   | 68650089  | mouse | 14804311 | 2450    |
| 2 | 2p13   | 68652539  | 2p13   | 70975429  | mouse | 2322890  | 14735   |
| 2 | 2p13   | 70990164  | 2p13   | 74026347  | mouse | 3036183  | 200     |
| 2 | 2p13   | 74026547  | 2p11.2 | 87042812  | mouse | 13016265 | 9589141 |
| 2 | 2q11.2 | 96631953  | 2q12   | 106560466 | mouse | 9928513  | 428319  |
| 2 | 2q12   | 106988785 | 2q12   | 108672097 | mouse | 1683312  | 1747870 |
| 2 | 2q13   | 110419967 | 2q13   | 113554679 | mouse | 3134712  | 790503  |
| 2 | 2q14.1 | 114345182 | 2q14.3 | 122483460 | mouse | 8138278  | 1393544 |
| 2 | 2q14.3 | 123877004 | 2q14.3 | 124910919 | mouse | 1033915  | 2210776 |
| 2 | 2q14.3 | 127121695 | 2q14.3 | 128690762 | mouse | 1569067  | 35308   |
| 2 | 2q14.3 | 128726070 | 2q21.1 | 131913009 | mouse | 3186939  | 1248115 |
| 2 | 2q21.2 | 133161124 | 2q22   | 138624340 | mouse | 5463216  | 1330995 |
| 2 | 2q22   | 139955335 | 2q32.1 | 188356222 | mouse | 48400887 | 189960  |
| 2 | 2q32.1 | 188546182 | 2q32.2 | 190478738 | mouse | 1932556  | 200     |
| 2 | 2q32.2 | 190478938 | 2q32.3 | 196737493 | mouse | 6258555  | 470     |
| 2 | 2q32.3 | 196737963 | 2q37.3 | 242764207 | mouse | 46026244 |         |
| 3 | 3p26   | 78258     | 3p25   | 12864927  | mouse | 12786669 | 70612   |
| 3 | 3p25   | 12935539  | 3p25   | 15135116  | mouse | 2199577  | 1166897 |
| 3 | 3p25   | 16302013  | 3p24   | 20077784  | mouse | 3775771  | 2919228 |
| 3 | 3p24   | 22997012  | 3p24   | 27550695  | mouse | 4553683  | 54777   |
| 3 | 3p24   | 27605472  | 3p22   | 37067985  | mouse | 9462513  | 14968   |
| 3 | 3p22   | 37082953  | 3p21.3 | 46264937  | mouse | 9181984  | 5941232 |
| 3 | 3p21.2 | 52206169  | 3p14.3 | 57784230  | mouse | 5578061  | 16285   |
| 3 | 3p14.3 | 57800515  | 3p14.1 | 63864162  | mouse | 6063647  | 8531    |
| 3 | 3p14.1 | 63872693  | 3p12   | 75092934  | mouse | 11220241 | 640629  |
| 3 | 3p12   | 75733563  | 3q21   | 126621496 | mouse | 50887933 | 394445  |
| 3 | 3q21   | 127015941 | 3q21   | 130317226 | mouse | 3301285  | 896037  |
| 3 | 3q21   | 131213263 | 3q24   | 149369030 | mouse | 18155767 | 986607  |
| 3 | 3q24   | 150355637 | 3q26.1 | 169224070 | mouse | 18868433 | 74746   |
| 3 | 3q26.2 | 169298816 | 3q26.2 | 171956943 | mouse | 2658127  | 200     |
| 3 | 3q26.2 | 171957143 | 3q26.3 | 179505847 | mouse | 7548704  | 4206    |
| 3 | 3q26.3 | 179510053 | 3q27   | 184220160 | mouse | 4710107  | 23408   |
| 3 | 3q26.3 | 184243568 | 3q29   | 196687900 | mouse | 12444332 | 148996  |
| 3 | 3q29   | 196836896 | 3q29   | 198725190 | mouse | 1888294  |         |
| 4 | 4p16   | 1151072   | 4p16   | 3792758   | mouse | 2641686  | 405599  |
| 4 | 4p16   | 4198357   | 4p16   | 8859586   | mouse | 4661229  | 615355  |
| 4 | 4p16   | 9474941   | 4q22   | 89368712  | mouse | 79893771 | 200     |
| 4 | 4q22   | 89368912  | 4q22   | 95665419  | mouse | 6296507  | 21066   |
| 4 | 4q22   | 95686485  | 4q26   | 121086919 | mouse | 25400434 | 245410  |
| 4 | 4q27   | 121332329 | 4q27   | 122734117 | mouse | 1401788  | 200     |
| 4 | 4q27   | 122734317 | 4q31.1 | 141656124 | mouse | 18921807 | 65613   |
| 4 | 4q31.1 | 141721737 | 4q31.2 | 151341774 | mouse | 9620037  | 90922   |
| 4 | 4q31.2 | 151432696 | 4q32   | 163691876 | mouse | 12259180 | 279671  |
| 4 | 4q32   | 163971547 | 4q35   | 191462724 | mouse | 27491177 |         |
| 5 | 5p15.3 | 224239    | 5p15.3 | 8302649   | mouse | 8078410  | 200     |
| 5 | 5p15.3 | 8302849   | 5p12   | 42875358  | mouse | 34572509 | 611682  |
| 5 | 5p12   | 43487040  | 5q15   | 96161775  | mouse | 52674735 | 71680   |

|   |          |           |          |           |       |          |          |
|---|----------|-----------|----------|-----------|-------|----------|----------|
| 5 | 5q15     | 96233455  | 5q21     | 98428174  | mouse | 2194719  | 200      |
| 5 | 5q21     | 98428374  | 5q21     | 101907132 | mouse | 3478758  | 883494   |
| 5 | 5q21     | 102790626 | 5q22     | 110093254 | mouse | 7302628  | 236320   |
| 5 | 5q22     | 110329574 | 5q22     | 112320424 | mouse | 1990850  | 200      |
| 5 | 5q22     | 112320624 | 5q23.3   | 130393506 | mouse | 18072882 | 121559   |
| 5 | 5q23.3   | 130515065 | 5q31.1   | 134084748 | mouse | 3569683  | 20422    |
| 5 | 5q31.1   | 134105170 | 5q31.1   | 137121370 | mouse | 3016200  | 135591   |
| 5 | 5q31.1   | 137256961 | 5q32     | 147606363 | mouse | 10349402 | 24949    |
| 5 | 5q32     | 147631312 | 5q33.1   | 150267493 | mouse | 2636181  | 101395   |
| 5 | 5q33.1   | 150368888 | 5q33.2   | 154303864 | mouse | 3934976  | 6205     |
| 5 | 5q33.2   | 154310069 | 5q35     | 171867674 | mouse | 17557605 | 1830752  |
| 5 | 5q35     | 173698426 | 5q35     | 177106680 | mouse | 3408254  | 377237   |
| 5 | 5q35     | 177483917 | 5q35     | 180744042 | mouse | 3260125  |          |
| 6 | 6p25     | 171287    | 6p22.3   | 20123166  | mouse | 19951879 | 4996     |
| 6 | 6p22.3   | 20128162  | 6p22.1   | 29077605  | mouse | 8949443  | 63303    |
| 6 | 6p22.1   | 29140908  | 6p21.3   | 33298631  | mouse | 4157723  | 62324    |
| 6 | 6p21.3   | 33360955  | 6p21.2   | 39059211  | mouse | 5698256  | 220851   |
| 6 | 6p21.2   | 39280062  | 6p12     | 49700593  | mouse | 10420531 | 103832   |
| 6 | 6p12     | 49804425  | 6p12     | 52714965  | mouse | 2910540  | 10282    |
| 6 | 6p12     | 52725247  | 6p12     | 55784269  | mouse | 3059022  | 441631   |
| 6 | 6p12     | 56225900  | 6q13     | 73858776  | mouse | 17632876 | 154406   |
| 6 | 6q13     | 74013182  | 6q14     | 86338899  | mouse | 12325717 | 1406474  |
| 6 | 6q14     | 87745373  | 6q16.3   | 100244557 | mouse | 12499184 | 290710   |
| 6 | 6q16.3   | 100535267 | 6q22.1   | 116988488 | mouse | 16453221 | 60550    |
| 6 | 6q22.1   | 117049038 | 6q22.3   | 123084295 | mouse | 6035257  | 50712    |
| 6 | 6q22.3   | 123135007 | 6q25.1   | 150140235 | mouse | 27005228 | 61007    |
| 6 | 6q25.1   | 150201242 | 6q25.2   | 154942085 | mouse | 4740843  | 67467    |
| 6 | 6q25.2   | 155009552 | 6q25.3   | 158794650 | mouse | 3785098  | 1142933  |
| 6 | 6q25.3   | 159937583 | 6q27     | 167369970 | mouse | 7432387  | 391160   |
| 6 | 6q27     | 167761130 | 6q27     | 170547318 | mouse | 2786188  |          |
| 7 | 7p22     | 176757    | 7p22     | 640366    | mouse | 463609   | 6113567  |
| 7 | 7p22     | 6753933   | 7p21     | 12241969  | mouse | 5488036  | 30502    |
| 7 | 7p21     | 12272471  | 7p21     | 19456148  | mouse | 7183677  | 7609     |
| 7 | 7p21     | 19463757  | 7p15.3   | 22236982  | mouse | 2773225  | 726976   |
| 7 | 7p15.3   | 22963958  | 7p14     | 32800883  | mouse | 9836925  | 77263    |
| 7 | 7p14     | 32878146  | 7p14     | 36045970  | mouse | 3167824  | 185192   |
| 7 | 7p14     | 36231162  | 7p13     | 43312709  | mouse | 7081547  | 308729   |
| 7 | 7p13     | 43621438  | 7p11.2   | 55012415  | mouse | 11390977 | 11193852 |
| 7 | 7q11.2.1 | 66206267  | 7q11.2.3 | 71582029  | mouse | 5375762  | 546803   |
| 7 | 7q11.2.3 | 72128832  | 7q11.2.3 | 73887786  | mouse | 1758954  | 2420521  |
| 7 | 7q11.2.3 | 76308307  | 7q21.1   | 84871677  | mouse | 8563370  | 60858    |
| 7 | 7q21.1   | 84932535  | 7q21.3   | 92243945  | mouse | 7311410  | 90100    |
| 7 | 7q21.2   | 92334045  | 7q21.3   | 97098638  | mouse | 4764593  | 106262   |
| 7 | 7q21.3   | 97204900  | 7q22     | 98816819  | mouse | 1611919  | 306844   |
| 7 | 7q22     | 99123663  | 7q22     | 101660815 | mouse | 2537152  | 218131   |
| 7 | 7q22     | 101878946 | 7q22     | 104742436 | mouse | 2863490  | 12403    |
| 7 | 7q22     | 104754839 | 7q31.1   | 107320074 | mouse | 2565235  | 3227     |
| 7 | 7q31.1   | 107323301 | 7q31.1   | 111682409 | mouse | 4359108  | 3780     |
| 7 | 7q31.1   | 111686189 | 7q36     | 149864544 | mouse | 38178355 | 38834    |
| 7 | 7q36     | 149903378 | 7q36     | 156511361 | mouse | 6607983  | 20564    |
| 7 | 7q36     | 156531925 | 7q36     | 158238121 | mouse | 1706196  |          |
| 8 | 8p23.3   | 553737    | 8p23.1   | 7056332   | mouse | 6502595  | 925656   |
| 8 | 8p23.1   | 7981988   | 8p23.1   | 9510886   | mouse | 1528898  | 68406    |
| 8 | 8p23.1   | 9579292   | 8p23.1   | 11711299  | mouse | 2132007  | 642961   |
| 8 | 8p23.1   | 12354260  | 8p22     | 17763961  | mouse | 5409701  | 38349    |
| 8 | 8p22     | 17802310  | 8p21     | 19985868  | mouse | 2183558  | 22416    |
| 8 | 8p21     | 20008284  | 8p12     | 28970491  | mouse | 8962207  | 40586    |
| 8 | 8p12     | 29011077  | 8p12     | 36514720  | mouse | 7503643  | 200      |

|    |         |           |         |           |       |          |          |
|----|---------|-----------|---------|-----------|-------|----------|----------|
| 8  | 8p12    | 36514920  | 8p12    | 37697674  | mouse | 1182754  | 6312     |
| 8  | 8p12    | 37703986  | 8p11.2  | 42246576  | mouse | 4542590  | 5669032  |
| 8  | 8q11.2  | 47915608  | 8q11.2  | 49588255  | mouse | 1672647  | 809064   |
| 8  | 8q11.2  | 50397319  | 8q12    | 56285211  | mouse | 5887892  | 101410   |
| 8  | 8q12    | 56386621  | 8q12    | 62430547  | mouse | 6043926  | 200      |
| 8  | 8q12    | 62430747  | 8q12    | 63737128  | mouse | 1306381  | 62124    |
| 8  | 8q12    | 63799252  | 8q13    | 67059557  | mouse | 3260305  | 15017    |
| 8  | 8q13    | 67074574  | 8q21.1  | 75849464  | mouse | 8774890  | 72224    |
| 8  | 8q21.1  | 75921688  | 8q21.2  | 86722830  | mouse | 10801142 | 2352     |
| 8  | 8q21.2  | 86725182  | 8q22.1  | 96908031  | mouse | 10182849 | 174801   |
| 8  | 8q22.1  | 97082832  | 8q24.3  | 145883574 | mouse | 48800742 |          |
| 9  | 9p24    | 100687    | 9p24    | 6655150   | mouse | 6554463  | 77984    |
| 9  | 9p24    | 6733134   | 9p21    | 27287159  | mouse | 20554025 | 28023    |
| 9  | 9p21    | 27315182  | 9p13    | 38461949  | mouse | 11146767 | 25095711 |
| 9  | 9q13    | 63557660  | 9q21.2  | 76348435  | mouse | 12790775 | 217695   |
| 9  | 9q21.2  | 76566130  | 9q21.3  | 79707435  | mouse | 3141305  | 80230    |
| 9  | 9q21.3  | 79787665  | 9q21.3  | 83878430  | mouse | 4090765  | 455066   |
| 9  | 9q21.3  | 84333496  | 9q22.1  | 88142795  | mouse | 3809299  | 184093   |
| 9  | 9q22.1  | 88326888  | 9q22.2  | 90365482  | mouse | 2038594  | 290090   |
| 9  | 9q22.2  | 90655572  | 9q22.3  | 93266234  | mouse | 2610662  | 230054   |
| 9  | 9q22.3  | 93496288  | 9q33    | 116942209 | mouse | 23445921 | 51576    |
| 9  | 9q33    | 116993785 | 9q33    | 121409752 | mouse | 4415967  | 200      |
| 9  | 9q33    | 121409952 | 9q33    | 124499927 | mouse | 3089975  | 200      |
| 9  | 9q33    | 124500127 | 9q34.1  | 127752163 | mouse | 3252036  | 23693    |
| 9  | 9q34.1  | 127775856 | 9q34.1  | 129390603 | mouse | 1614747  | 95857    |
| 9  | 9q34.1  | 129486460 | 9q34.1  | 131919071 | mouse | 2432611  | 22363    |
| 9  | 9q34.1  | 131941434 | 9q34.2  | 134321460 | mouse | 2380026  |          |
| 10 | 10p15   | 128739    | 10p15   | 6009060   | mouse | 5880321  | 56761    |
| 10 | 10p15   | 6065821   | 10p13   | 15603605  | mouse | 9537784  | 21514    |
| 10 | 10p13   | 15625119  | 10p12.1 | 27681482  | mouse | 12056363 | 19708    |
| 10 | 10p12.1 | 27701190  | 10p12.1 | 29062204  | mouse | 1361014  | 38912    |
| 10 | 10p12.1 | 29101116  | 10p11.2 | 33217351  | mouse | 4116235  | 200      |
| 10 | 10p11.2 | 33217551  | 10p11.2 | 35326646  | mouse | 2109095  | 449121   |
| 10 | 10p11.2 | 35775767  | 10p11.2 | 37242075  | mouse | 1466308  | 5826923  |
| 10 | 10q11.2 | 43068998  | 10q11.2 | 45932301  | mouse | 2863303  | 871195   |
| 10 | 10q11.2 | 46803496  | 10q11.2 | 51487686  | mouse | 4684190  | 407430   |
| 10 | 10q11.2 | 51895116  | 10q21.1 | 54461632  | mouse | 2566516  | 589271   |
| 10 | 10q21.1 | 55050903  | 10q22.2 | 74749467  | mouse | 19698564 | 13121    |
| 10 | 10q22.2 | 74762588  | 10q22.3 | 81955250  | mouse | 7192662  | 200      |
| 10 | 10q22.3 | 81955450  | 10q23.2 | 89096592  | mouse | 7141142  | 294790   |
| 10 | 10q23.3 | 89391382  | 10q26.1 | 121315237 | mouse | 31923855 | 200      |
| 10 | 10q26.1 | 121315437 | 10q26.3 | 135288586 | mouse | 13973149 |          |
| 11 | 11p15.5 | 1206762   | 11p15.5 | 3213050   | mouse | 2006288  | 377291   |
| 11 | 11p15.4 | 3590341   | 11p15.1 | 17495811  | mouse | 13905470 | 200      |
| 11 | 11p15.1 | 17496011  | 11p14   | 25978536  | mouse | 8482525  | 270987   |
| 11 | 11p14   | 26249523  | 11q12   | 58001448  | mouse | 31751925 | 443508   |
| 11 | 11q12   | 58444956  | 11q13.3 | 63137398  | mouse | 4692442  | 1311577  |
| 11 | 11q13.1 | 64448975  | 11q13.3 | 68957204  | mouse | 4508229  | 62693    |
| 11 | 11q13.3 | 69019897  | 11q13.4 | 71432282  | mouse | 2412385  | 417529   |
| 11 | 11q13.4 | 71849811  | 11q14.3 | 89511911  | mouse | 17662100 | 535522   |
| 11 | 11q14.3 | 90047433  | 11q22.3 | 107468989 | mouse | 17421556 | 17954    |
| 11 | 11q22.3 | 107486943 | 11q25   | 134965945 | mouse | 27479002 |          |
| 12 | 12p13.3 | 61014     | 12p13.3 | 2682266   | mouse | 2621252  | 102138   |
| 12 | 12p13.3 | 2784404   | 12p13.3 | 9184429   | mouse | 6400025  | 96939    |
| 12 | 12p13.3 | 9281368   | 12p11.2 | 32437652  | mouse | 23156284 | 5891021  |
| 12 | 12p12   | 38328673  | 12q13.2 | 54789653  | mouse | 16460980 | 283668   |
| 12 | 12q13.3 | 55073321  | 12q23   | 104257973 | mouse | 49184652 | 34416    |
| 12 | 12q23   | 104292389 | 12q24.1 | 108109684 | mouse | 3817295  | 148753   |

|    |          |           |          |           |       |          |          |
|----|----------|-----------|----------|-----------|-------|----------|----------|
| 12 | 12q24.1  | 108258437 | 12q24.1  | 110367340 | mouse | 2108903  | 20755    |
| 12 | 12q24.1  | 110388095 | 12q24.31 | 121280245 | mouse | 10892150 | 60116    |
| 12 | 12q24.31 | 121340361 | 12q24.33 | 132216098 | mouse | 10875737 |          |
| 13 | 13q12.1  | 18871102  | 13q12.1  | 22293650  | mouse | 3422548  | 3421521  |
| 13 | 13q12.1  | 25715171  | 13q13    | 33271776  | mouse | 7556605  | 152978   |
| 13 | 13q13    | 33424754  | 13q14.1  | 40183356  | mouse | 6758602  | 259477   |
| 13 | 13q14.1  | 40442833  | 13q14.2  | 48735681  | mouse | 8292848  | 405181   |
| 13 | 13q14.2  | 49140862  | 13q14.3  | 51291453  | mouse | 2150591  | 391933   |
| 13 | 13q14.3  | 51683386  | 13q33    | 101982034 | mouse | 50298648 | 391134   |
| 13 | 13q33    | 102373168 | 13q34    | 114114558 | mouse | 11741390 |          |
| 14 | 14q11.2  | 18231817  | 14q11.2  | 23133159  | mouse | 4901342  | 15235    |
| 14 | 14q11.2  | 23148394  | 14q22    | 50233231  | mouse | 27084837 | 445779   |
| 14 | 14q21    | 50679010  | 14q22    | 56613453  | mouse | 5934443  | 43508    |
| 14 | 14q22    | 56656961  | 14q32.3  | 104347485 | mouse | 47690524 |          |
| 15 | 15q11.2  | 22618175  | 15q13    | 25992349  | mouse | 3374174  | 835400   |
| 15 | 15q13    | 26827749  | 15q13    | 27946389  | mouse | 1118640  | 830458   |
| 15 | 15q13    | 28776847  | 15q13    | 30021254  | mouse | 1244407  | 491963   |
| 15 | 15q13    | 30513217  | 15q14    | 32238453  | mouse | 1725236  | 17305510 |
| 15 | 15q21.1  | 49543963  | 15q24    | 73595971  | mouse | 24052008 | 82158    |
| 15 | 15q24    | 73678129  | 15q24    | 75746357  | mouse | 2068228  | 122429   |
| 15 | 15q24    | 75868786  | 15q25    | 77705431  | mouse | 1836645  | 140861   |
| 15 | 15q25    | 77846292  | 15q25    | 80141631  | mouse | 2295339  | 657967   |
| 15 | 15q25    | 80799598  | 15q25    | 82356077  | mouse | 1556479  | 1090247  |
| 15 | 15q25    | 83446324  | 15q25    | 89148393  | mouse | 5702069  | 43304    |
| 15 | 15q26.1  | 89191697  | 15q26.3  | 99857344  | mouse | 10665647 |          |
| 16 | 16p13.3  | 179003    | 16p13.3  | 3238113   | mouse | 3059110  | 46692    |
| 16 | 16p13.3  | 3284805   | 16p12    | 16153065  | mouse | 12868260 | 505005   |
| 16 | 16p13.1  | 16658070  | 16p12    | 18128289  | mouse | 1470219  | 523976   |
| 16 | 16p12    | 18652265  | 16p11.2  | 31516640  | mouse | 12864375 | 14917245 |
| 16 | 16q12.1  | 46433885  | 16q22    | 69711086  | mouse | 23277201 | 211619   |
| 16 | 16q22    | 69922705  | 16q23    | 74093638  | mouse | 4170933  | 131890   |
| 16 | 16q23    | 74225528  | 16q24    | 89810999  | mouse | 15585471 |          |
| 17 | 17p13    | 18172     | 17p13    | 4482673   | mouse | 4464501  | 42820    |
| 17 | 17p13    | 4525493   | 17p13    | 6691646   | mouse | 2166153  | 101837   |
| 17 | 17p13    | 6793483   | 17p11.2  | 16499527  | mouse | 9706044  | 368084   |
| 17 | 17p11.2  | 16867611  | 17p11.2  | 20762124  | mouse | 3894513  | 4653638  |
| 17 | 17q11.2  | 25415762  | 17q11.2  | 28705665  | mouse | 3289903  | 205653   |
| 17 | 17q12    | 28911318  | 17q12    | 34312844  | mouse | 5401526  | 256392   |
| 17 | 17q12    | 34569236  | 17q21.2  | 35922531  | mouse | 1353295  | 399409   |
| 17 | 17q21.2  | 36321940  | 17q21.3  | 45860244  | mouse | 9538304  | 155516   |
| 17 | 17q21.3  | 46015760  | 17q23    | 58383936  | mouse | 12368176 | 164268   |
| 17 | 17q23    | 58548204  | 17q24    | 60630038  | mouse | 2081834  | 88265    |
| 17 | 17q24    | 60718303  | 17q24    | 63138272  | mouse | 2419969  | 233143   |
| 17 | 17q24    | 63371415  | 17q24    | 66677334  | mouse | 3305919  | 21152    |
| 17 | 17q24    | 66698486  | 17q25    | 81588123  | mouse | 14889637 |          |
| 18 | 18p11.32 | 856048    | 18p11.32 | 2458344   | mouse | 1602296  | 74994    |
| 18 | 18p11.32 | 2533338   | 18p11.2  | 9962250   | mouse | 7428912  | 1619242  |
| 18 | 18p11.2  | 11581492  | 18p11.2  | 13926692  | mouse | 2345200  | 4501844  |
| 18 | 18q11.2  | 18428536  | 18q12.3  | 40945714  | mouse | 22517178 | 299289   |
| 18 | 18q12.3  | 41245003  | 18q21.3  | 54027458  | mouse | 12782455 | 26311    |
| 18 | 18q21.3  | 54053769  | 18q21.3  | 58048268  | mouse | 3994499  | 72662    |
| 18 | 18q21.3  | 58120930  | 18q22    | 65726427  | mouse | 7605497  | 401440   |
| 18 | 18q22    | 66127867  | 18q23    | 77740271  | mouse | 11612404 |          |
| 19 | 19p13.3  | 221385    | 19p13.3  | 4164504   | mouse | 3943119  | 6694     |
| 19 | 19p13.3  | 4171198   | 19p13.2  | 7004895   | mouse | 2833697  | 47367    |
| 19 | 19p13.2  | 7052262   | 19p13.2  | 8217865   | mouse | 1165603  | 546352   |
| 19 | 19p13.2  | 8764217   | 19p13.2  | 12423093  | mouse | 3658876  | 179562   |
| 19 | 19p13.2  | 12602655  | 19p13.1  | 14516393  | mouse | 1913738  | 2498424  |

|    |         |           |         |           |       |           |          |
|----|---------|-----------|---------|-----------|-------|-----------|----------|
| 19 | 19p13.1 | 17014817  | 19p13.1 | 19619771  | mouse | 2604954   | 13646311 |
| 19 | 19q12   | 33266082  | 19q12   | 34763281  | mouse | 1497199   | 12244    |
| 19 | 19q12   | 34775525  | 19q13.3 | 53019374  | mouse | 18243849  | 456871   |
| 19 | 19q13.3 | 53476245  | 19q13.4 | 56776884  | mouse | 3300639   | 2476303  |
| 19 | 19q13.4 | 59253187  | 19q13.4 | 60885084  | mouse | 1631897   |          |
| 20 | 20p13   | 16324     | 20p13   | 1390878   | mouse | 1374554   | 304604   |
| 20 | 20p13   | 1695482   | 20p11.2 | 24665495  | mouse | 22970013  | 5877883  |
| 20 | 20q11.2 | 30543378  | 20q13.3 | 63578987  | mouse | 33035609  |          |
| 21 | 21q11.2 | 14438806  | 21q22.3 | 42332141  | mouse | 27893335  | 53407    |
| 21 | 21q22.3 | 42385548  | 21q22.3 | 44025134  | mouse | 1639586   | 200      |
| 21 | 21q22.3 | 44025334  | 21q22.3 | 46940887  | mouse | 2915553   |          |
| 22 | 22q11.2 | 17713396  | 22q11.2 | 20662815  | mouse | 2949419   | 502162   |
| 22 | 22q11.2 | 21164977  | 22q11.2 | 23328753  | mouse | 2163776   | 198190   |
| 22 | 22q11.2 | 23526943  | 22q12.1 | 27480781  | mouse | 3953838   | 12363    |
| 22 | 22q12.1 | 27493144  | 22q12.2 | 30335430  | mouse | 2842286   | 1655212  |
| 22 | 22q12.3 | 31990642  | 22q12.3 | 34221854  | mouse | 2231212   | 18148    |
| 22 | 22q12.3 | 34240002  | 22q13.3 | 49316371  | mouse | 15076369  |          |
| X  | Xp22.2  | 9762041   | Xp22.11 | 23051645  | mouse | 13289604  | 998      |
| X  | Xp22.11 | 23052643  | Xp21.1  | 36457204  | mouse | 13404561  | 200      |
| X  | Xp21.1  | 36457404  | Xp11.3  | 46711758  | mouse | 10254354  | 67110    |
| X  | Xp11.3  | 46778868  | Xp11.23 | 48895270  | mouse | 2116402   | 137      |
| X  | Xp11.23 | 48895407  | Xp11.22 | 50082060  | mouse | 1186653   | 1677593  |
| X  | Xp11.22 | 51759653  | Xp11.22 | 53792537  | mouse | 2032884   | 7007648  |
| X  | Xq11.2  | 60800185  | Xq21.1  | 81290506  | mouse | 20490321  | 35817    |
| X  | Xq21.1  | 81326323  | Xq21.31 | 91417469  | mouse | 10091146  | 372303   |
| X  | Xq21.31 | 91789772  | Xq23    | 112595429 | mouse | 20805657  | 539446   |
| X  | Xq23    | 113134875 | Xq28    | 152009549 | mouse | 38874674  |          |
| 1  | 1p36.3  | 2916481   | 1p34.2  | 40197771  | pig   | 37281290  | 1506067  |
| 1  | 1p34.2  | 41703838  | 1p31.1  | 83798949  | pig   | 42095111  | 1450819  |
| 1  | 1p22    | 85249768  | 1q24    | 167431107 | pig   | 82181339  | 1443766  |
| 1  | 1q24    | 168874873 | 1q25    | 181731277 | pig   | 12856404  | 2917436  |
| 1  | 1q31    | 184648713 | 1q31    | 190994647 | pig   | 6345934   | 2875682  |
| 1  | 1q31    | 193870329 | 1q32    | 198449609 | pig   | 4579280   | 2303801  |
| 1  | 1q32    | 200753410 | 1q32    | 202039491 | pig   | 1286081   | 2962346  |
| 1  | 1q32    | 205001837 | 1q32    | 210456462 | pig   | 5454625   | 1920166  |
| 1  | 1q41    | 212376628 | 1q41    | 219283155 | pig   | 6906527   | 1176861  |
| 1  | 1q42    | 220460016 | 1q42    | 220752892 | pig   | 292876    | 653633   |
| 1  | 1q42    | 221406525 | 1q42    | 223968729 | pig   | 2562204   | 7043506  |
| 1  | 1q42    | 231012235 | 1q43    | 236369159 | pig   | 5356924   | 1596786  |
| 1  | 1q43    | 237965945 | 1q43    | 238022215 | pig   | 56270     | 1568421  |
| 1  | 1q43    | 239590636 | 1q44    | 242033847 | pig   | 2443211   |          |
| 2  | 2p25.3  | 1564865   | 2q13    | 112349922 | pig   | 110785057 | 2867465  |
| 2  | 2q14.1  | 115217387 | 2q14.2  | 119249570 | pig   | 4032183   | 1015362  |
| 2  | 2q14.2  | 120264932 | 2q14.3  | 126294676 | pig   | 6029744   | 3066395  |
| 2  | 2q14.3  | 129361071 | 2q21.1  | 129726694 | pig   | 365623    | 3818018  |
| 2  | 2q21.2  | 133544712 | 2q23    | 150240956 | pig   | 16696244  | 3294920  |
| 2  | 2q23    | 153535876 | 2q37.3  | 238743000 | pig   | 85207124  |          |
| 3  | 3p26    | 140869    | 3p25    | 14703453  | pig   | 14562584  | 997772   |
| 3  | 3p25    | 15701225  | 3p12    | 75044362  | pig   | 59343137  | 863964   |
| 3  | 3p12    | 75908326  | 3q21    | 126435252 | pig   | 50526926  | 1969389  |
| 3  | 3q21    | 128404641 | 3q21    | 129808134 | pig   | 1403493   | 1444709  |
| 3  | 3q21    | 131252843 | 3q22    | 133084059 | pig   | 1831216   | 410493   |
| 3  | 3q22    | 133494552 | 3q29    | 198464213 | pig   | 64969661  |          |
| 4  | 4p16    | 541248    | 4p16    | 3429821   | pig   | 2888573   | 1091496  |
| 4  | 4p16    | 4521317   | 4p16    | 8358037   | pig   | 3836720   | 1407306  |
| 4  | 4p16    | 9765343   | 4q12    | 56080333  | pig   | 46314990  | 457143   |
| 4  | 4q12    | 56537476  | 4q21.1  | 78265810  | pig   | 21728334  | 3477274  |
| 4  | 4q21.2  | 81743084  | 4q32    | 156602424 | pig   | 74859340  | 139828   |

|    |         |           |         |           |     |          |          |
|----|---------|-----------|---------|-----------|-----|----------|----------|
| 4  | 4q32    | 156742252 | 4q32    | 156762371 | pig | 20119    | 346999   |
| 4  | 4q32    | 157109370 | 4q32    | 165895860 | pig | 8786490  | 621639   |
| 4  | 4q32    | 166517499 | 4q32    | 167376267 | pig | 858768   | 862724   |
| 4  | 4q32    | 168238991 | 4q34    | 176027692 | pig | 7788701  | 1111775  |
| 4  | 4q34    | 177139467 | 4q35    | 187764074 | pig | 10624607 | 275218   |
| 4  | 4q35    | 188039292 | 4q35    | 191457896 | pig | 3418604  |          |
| 5  | 5p15.3  | 2463071   | 5p15.3  | 9816235   | pig | 7353164  | 1668480  |
| 5  | 5p15.2  | 11484715  | 5p15.1  | 15881962  | pig | 4397247  | 1551910  |
| 5  | 5p15.1  | 17433872  | 5q12    | 63253626  | pig | 45819754 | 1277934  |
| 5  | 5q13.1  | 64531560  | 5q13.2  | 71841995  | pig | 7310435  | 1657066  |
| 5  | 5q13.3  | 73499061  | 5q33.1  | 150116348 | pig | 76617287 | 1691586  |
| 5  | 5q33.1  | 151807934 | 5q35    | 172328339 | pig | 20520405 |          |
| 6  | 6p25    | 706219    | 6p21.3  | 33972374  | pig | 33266155 | 3850373  |
| 6  | 6p21.2  | 37822747  | 6p12    | 51972043  | pig | 14149296 | 1912919  |
| 6  | 6p12    | 53884962  | 6p12    | 63665829  | pig | 9780867  | 1203697  |
| 6  | 6q12    | 64869526  | 6q13    | 73338720  | pig | 8469194  | 1124283  |
| 6  | 6q13    | 74463003  | 6q14    | 83886431  | pig | 9423428  | 1295429  |
| 6  | 6q14    | 85181860  | 6q22.1  | 116138228 | pig | 30956368 | 828782   |
| 6  | 6q22.1  | 116967010 | 6q27    | 168734515 | pig | 51767505 |          |
| 7  | 7p22    | 654100    | 7p22    | 6441062   | pig | 5786962  | 1186185  |
| 7  | 7p21    | 7627247   | 7p15.3  | 23255428  | pig | 15628181 | 277956   |
| 7  | 7p15.3  | 23533384  | 7p14    | 37089533  | pig | 13556149 | 1270328  |
| 7  | 7p14    | 38359861  | 7p14    | 38359955  | pig | 94       | 2951429  |
| 7  | 7p14    | 41311384  | 7p12    | 47724972  | pig | 6413588  | 1336412  |
| 7  | 7p12    | 49061384  | 7p11.2  | 54932101  | pig | 5870717  | 255251   |
| 7  | 7p11.2  | 55187352  | 7p11.2  | 55187528  | pig | 176      | 662497   |
| 7  | 7p11.2  | 55850025  | 7q11.22 | 66101340  | pig | 10251315 | 1427104  |
| 7  | 7q11.22 | 67528444  | 7q11.23 | 71047205  | pig | 3518761  | 1200457  |
| 7  | 7q11.23 | 72247662  | 7q11.23 | 75109793  | pig | 2862131  | 1314085  |
| 7  | 7q11.23 | 76423878  | 7q21.1  | 86671814  | pig | 10247936 | 1486627  |
| 7  | 7q21.1  | 88158441  | 7q21.3  | 96965209  | pig | 8806768  | 662500   |
| 7  | 7q21.3  | 97627709  | 7q22    | 101774951 | pig | 4147242  | 1038977  |
| 7  | 7q22    | 102813928 | 7q31.1  | 107467978 | pig | 4654050  | 1447211  |
| 7  | 7q31.1  | 108915189 | 7q34    | 142089425 | pig | 33174236 | 1384967  |
| 7  | 7q35    | 143474392 | 7q36    | 148209911 | pig | 4735519  | 1764176  |
| 7  | 7q36    | 149974087 | 7q36    | 156351125 | pig | 6377038  |          |
| 8  | 8p23.3  | 554441    | 8p23.1  | 6230255   | pig | 5675814  | 2421403  |
| 8  | 8p23.1  | 8651658   | 8p23.1  | 8651735   | pig | 77       | 1201301  |
| 8  | 8p23.1  | 9853036   | 8p23.1  | 11567139  | pig | 1714103  | 1323644  |
| 8  | 8p22    | 12890783  | 8p22    | 16731148  | pig | 3840365  | 963288   |
| 8  | 8p22    | 17694436  | 8p22    | 17694591  | pig | 155      | 652308   |
| 8  | 8p22    | 18346899  | 8p22    | 18347274  | pig | 375      | 1258970  |
| 8  | 8p21    | 19606244  | 8p21    | 28742821  | pig | 9136577  | 688660   |
| 8  | 8p12    | 29431481  | 8p12    | 38581060  | pig | 9149579  | 1461214  |
| 8  | 8p11.2  | 40042274  | 8p11.2  | 42598262  | pig | 2555988  | 5892674  |
| 8  | 8q11.2  | 48490936  | 8q24.3  | 144879682 | pig | 96388746 |          |
| 9  | 9p24    | 234824    | 9p21    | 26715212  | pig | 26480388 | 932222   |
| 9  | 9p21    | 27647434  | 9p13    | 34121663  | pig | 6474229  | 1414657  |
| 9  | 9p13    | 35536320  | 9p13    | 37851756  | pig | 2315436  | 27042867 |
| 9  | 9q13    | 64894623  | 9q21.3  | 78377606  | pig | 13482983 | 1317748  |
| 9  | 9q21.3  | 79695354  | 9q21.3  | 82892439  | pig | 3197085  | 2355600  |
| 9  | 9q21.3  | 85248039  | 9q22.1  | 87692667  | pig | 2444628  | 646602   |
| 9  | 9q22.1  | 88339269  | 9q22.3  | 92303697  | pig | 3964428  | 1397135  |
| 9  | 9q22.3  | 93700832  | 9q34.1  | 131074882 | pig | 37374050 |          |
| 10 | 10p15   | 1837378   | 10p14   | 10877661  | pig | 9040283  | 2389374  |
| 10 | 10p13   | 13267035  | 10p12.3 | 18876007  | pig | 5608972  | 920909   |
| 10 | 10p12.3 | 19796916  | 10p12.1 | 26608481  | pig | 6811565  | 1574560  |
| 10 | 10p12.1 | 28183041  | 10p11.2 | 32263726  | pig | 4080685  | 1259874  |

|    |          |           |          |           |     |           |          |
|----|----------|-----------|----------|-----------|-----|-----------|----------|
| 10 | 10p11.2  | 33523600  | 10p11.2  | 36515040  | pig | 2991440   | 8081607  |
| 10 | 10q11.2  | 44596647  | 10q11.2  | 50573505  | pig | 5976858   | 1366073  |
| 10 | 10q11.2  | 51939578  | 10q21.1  | 59933761  | pig | 7994183   | 24554789 |
| 10 | 10q23.1  | 84488550  | 10q23.2  | 88326768  | pig | 3838218   | 1143768  |
| 10 | 10q23.3  | 89470536  | 10q26.3  | 135267504 | pig | 45796968  |          |
| 11 | 11p15.5  | 979822    | 11p15.5  | 3009963   | pig | 2030141   | 2479580  |
| 11 | 11p15.4  | 5489543   | 11p15.4  | 8973254   | pig | 3483711   | 1394336  |
| 11 | 11p15.4  | 10367590  | 11q13.3  | 70729241  | pig | 60361651  | 1425367  |
| 11 | 11q13.4  | 72154608  | 11q25    | 134342530 | pig | 62187922  |          |
| 12 | 12p13.3  | 447518    | 12p11.2  | 33716713  | pig | 33269195  | 5463711  |
| 12 | 12p12    | 39180424  | 12q13.1  | 47699745  | pig | 8519321   | 1357736  |
| 12 | 12q13.1  | 49057481  | 12q21.2  | 76569350  | pig | 27511869  | 673241   |
| 12 | 12q21.2  | 77242591  | 12q23    | 105469295 | pig | 28226704  | 1198075  |
| 12 | 12q23    | 106667370 | 12q23    | 107089525 | pig | 422155    | 1469929  |
| 12 | 12q24.1  | 108559454 | 12q24.33 | 133008803 | pig | 24449349  |          |
| 13 | 13q12.1  | 20644761  | 13q14.1  | 40176697  | pig | 19531936  | 921654   |
| 13 | 13q14.1  | 41098351  | 13q14.3  | 51972222  | pig | 10873871  | 658977   |
| 13 | 13q14.3  | 52631199  | 13q34    | 112986189 | pig | 60354990  |          |
| 14 | 14q11.2  | 18460413  | 14q13    | 36324614  | pig | 17864201  | 1427185  |
| 14 | 14q21    | 37751799  | 14q23    | 61777163  | pig | 24025364  | 1153857  |
| 14 | 14q23    | 62931020  | 14q32.3  | 104256064 | pig | 41325044  |          |
| 15 | 15q11.2  | 21326601  | 15q13    | 29402166  | pig | 8075565   | 1341827  |
| 15 | 15q13    | 30743993  | 15q22.3  | 62718616  | pig | 31974623  | 5033393  |
| 15 | 15q23    | 67752009  | 15q23    | 69197530  | pig | 1445521   | 1746717  |
| 15 | 15q24    | 70944247  | 15q24    | 74986799  | pig | 4042552   | 1469771  |
| 15 | 15q25    | 76456570  | 15q25    | 83207550  | pig | 6750980   | 1463933  |
| 15 | 15q25    | 84671483  | 15q25    | 86128267  | pig | 1456784   | 1623626  |
| 15 | 15q26.1  | 87751893  | 15q25    | 87751992  | pig | 99        | 1735910  |
| 15 | 15q26.1  | 89487902  | 15q26.3  | 96367453  | pig | 6879551   | 1210366  |
| 15 | 15q26.3  | 97577819  | 15q26.3  | 99198739  | pig | 1620920   |          |
| 16 | 16p13.3  | 189059    | 16p11.2  | 31368021  | pig | 31178962  | 15727089 |
| 16 | 16q12.1  | 47095110  | 16q12.2  | 54868307  | pig | 7773197   | 1658646  |
| 16 | 16q13    | 56526953  | 16q22    | 68066139  | pig | 11539186  | 1216807  |
| 16 | 16q22    | 69282946  | 16q24    | 89488396  | pig | 20205450  |          |
| 17 | 17p13    | 299201    | 17p11.2  | 17657721  | pig | 17358520  | 2892053  |
| 17 | 17p11.2  | 20549774  | 17p11.2  | 20549847  | pig | 73        | 4860204  |
| 17 | 17q11.2  | 25410051  | 17q21.1  | 35262313  | pig | 9852262   | 1129722  |
| 17 | 17q21.2  | 36392035  | 17q21.3  | 45255531  | pig | 8863496   | 1510831  |
| 17 | 17q21.3  | 46766362  | 17q24    | 60291685  | pig | 13525323  | 1395594  |
| 17 | 17q24    | 61687279  | 17q25    | 79768530  | pig | 18081251  |          |
| 18 | 18p11.32 | 609209    | 18p11.2  | 13750204  | pig | 13140995  | 4828048  |
| 18 | 18q11.2  | 18578252  | 18q12.3  | 40509868  | pig | 21931616  | 1915618  |
| 18 | 18q21.1  | 42425486  | 18q21.3  | 54938704  | pig | 12513218  | 1332720  |
| 18 | 18q21.3  | 56271424  | 18q23    | 76537891  | pig | 20266467  |          |
| 19 | 19p13.3  | 1698869   | 19p13.1  | 19521121  | pig | 17822252  | 13800964 |
| 19 | 19q12    | 33322085  | 19q13.4  | 61741374  | pig | 28419289  |          |
| 20 | 20p13    | 473725    | 20p13    | 2630616   | pig | 2156891   | 2157301  |
| 20 | 20p13    | 4787917   | 20p11.2  | 25209754  | pig | 20421837  | 5731785  |
| 20 | 20q11.2  | 30941539  | 20q13.3  | 59813043  | pig | 28871504  |          |
| 21 | 21q11.2  | 14747772  | 21q22.3  | 46764840  | pig | 32017068  |          |
| 22 | 22q11.2  | 15004087  | 22q11.2  | 16689189  | pig | 1685102   | 737785   |
| 22 | 22q11.2  | 17426974  | 22q11.2  | 22450228  | pig | 5023254   | 1259918  |
| 22 | 22q11.2  | 23710146  | 22q12.2  | 29660438  | pig | 5950292   | 1861764  |
| 22 | 22q12.3  | 31522202  | 22q13.3  | 42802580  | pig | 11280378  |          |
| X  | Xp22.33  | 6363408   | Xq28     | 151250564 | pig | 144887156 |          |
| 1  | 1p36.3   | 1008921   | 1p36.1   | 26032778  | rat | 25023857  | 91489    |
| 1  | 1p36.1   | 26124267  | 1p36.1   | 27828854  | rat | 1704587   | 686355   |
| 1  | 1p35     | 28515209  | 1p32     | 58369437  | rat | 29854228  | 110134   |



|   |        |           |        |           |     |          |         |
|---|--------|-----------|--------|-----------|-----|----------|---------|
| 1 | 1p32   | 58479571  | 1p31.2 | 66969868  | rat | 8490297  | 978114  |
| 1 | 1p31.2 | 67947982  | 1p22   | 89073417  | rat | 21125435 | 113453  |
| 1 | 1p22   | 89186870  | 1p22   | 93175146  | rat | 3988276  | 83037   |
| 1 | 1p22   | 93258183  | 1q23   | 154930185 | rat | 61672002 | 377653  |
| 1 | 1q23   | 155307838 | 1q32   | 204176920 | rat | 48869082 | 70329   |
| 1 | 1q32   | 204247249 | 1q42   | 220819436 | rat | 16572187 | 3116    |
| 1 | 1q42   | 220822552 | 1q42   | 222372946 | rat | 1550394  | 44741   |
| 1 | 1q42   | 222417687 | 1q42   | 224015581 | rat | 1597894  | 1307467 |
| 1 | 1q42   | 225323048 | 1q42   | 231579499 | rat | 6256451  | 680683  |
| 1 | 1q42   | 232260182 | 1q43   | 236371426 | rat | 4111244  | 146508  |
| 1 | 1q43   | 236517934 | 1q44   | 243221431 | rat | 6703497  |         |
| 2 | 2p25.3 | 1725528   | 2p25.3 | 3119186   | rat | 1393658  | 115846  |
| 2 | 2p25.3 | 3235032   | 2p22   | 35636081  | rat | 32401049 | 130407  |
| 2 | 2p22   | 35766488  | 2p16   | 52670599  | rat | 16904111 | 1176978 |
| 2 | 2p16   | 53847577  | 2p13   | 68650881  | rat | 14803304 | 1285    |
| 2 | 2p13   | 68652166  | 2p13   | 70975429  | rat | 2323263  | 29857   |
| 2 | 2p13   | 71005286  | 2p13   | 73965750  | rat | 2960464  | 48036   |
| 2 | 2p13   | 74013786  | 2p11.2 | 87050678  | rat | 13036892 | 9581163 |
| 2 | 2q11.2 | 96631841  | 2q12   | 106315238 | rat | 9683397  | 4092030 |
| 2 | 2q13   | 110407268 | 2q13   | 113552965 | rat | 3145697  | 790600  |
| 2 | 2q14.1 | 114343565 | 2q14.3 | 122430979 | rat | 8087414  | 1050505 |
| 2 | 2q14.3 | 123481484 | 2q14.3 | 124108818 | rat | 627334   | 200     |
| 2 | 2q14.3 | 124109018 | 2q14.3 | 124817492 | rat | 708474   | 386490  |
| 2 | 2q14.3 | 125203982 | 2q14.3 | 127021977 | rat | 1817995  | 69720   |
| 2 | 2q14.3 | 127091697 | 2q14.3 | 128691458 | rat | 1599761  | 34612   |
| 2 | 2q14.3 | 128726070 | 2q21.1 | 131934198 | rat | 3208128  | 1227241 |
| 2 | 2q21.2 | 133161439 | 2q22   | 138624341 | rat | 5462902  | 1331023 |
| 2 | 2q22   | 139955364 | 2q32.1 | 188356222 | rat | 48400858 | 347825  |
| 2 | 2q32.1 | 188704047 | 2q37.3 | 242775335 | rat | 54071288 |         |
| 3 | 3p26   | 96736     | 3p25   | 12864965  | rat | 12768229 | 132443  |
| 3 | 3p25   | 12997408  | 3p25   | 15135116  | rat | 2137708  | 1722155 |
| 3 | 3p24   | 16857271  | 3p24   | 20077802  | rat | 3220531  | 1106596 |
| 3 | 3p24   | 21184398  | 3p24   | 27569115  | rat | 6384717  | 36357   |
| 3 | 3p24   | 27605472  | 3p22   | 37074253  | rat | 9468781  | 8697    |
| 3 | 3p22   | 37082950  | 3p21.3 | 46267172  | rat | 9184222  | 200     |
| 3 | 3p21.3 | 46267372  | 3p21.2 | 52076095  | rat | 5808723  | 131703  |
| 3 | 3p21.2 | 52207798  | 3p14.3 | 57767106  | rat | 5559308  | 32811   |
| 3 | 3p14.3 | 57799917  | 3p14.1 | 63864176  | rat | 6064259  | 8480    |
| 3 | 3p14.1 | 63872656  | 3p12   | 75103631  | rat | 11230975 | 577389  |
| 3 | 3p12   | 75681020  | 3p12   | 90029395  | rat | 14348375 | 5035097 |
| 3 | 3q11.2 | 95064492  | 3q21   | 126603810 | rat | 31539318 | 656424  |
| 3 | 3q21   | 127260234 | 3q21   | 130317226 | rat | 3056992  | 896011  |
| 3 | 3q21   | 131213237 | 3q24   | 149369030 | rat | 18155793 | 970250  |
| 3 | 3q24   | 150339280 | 3q26.1 | 169224071 | rat | 18884791 | 80829   |
| 3 | 3q26.2 | 169304900 | 3q26.2 | 170409406 | rat | 1104506  | 62224   |
| 3 | 3q26.2 | 170471630 | 3q26.3 | 173034682 | rat | 2563052  | 161919  |
| 3 | 3q26.3 | 173196601 | 3q26.3 | 179507657 | rat | 6311056  | 17682   |
| 3 | 3q26.3 | 179525339 | 3q27   | 184219239 | rat | 4693900  | 36278   |
| 3 | 3q26.3 | 184255517 | 3q29   | 196679158 | rat | 12423641 | 157537  |
| 3 | 3q29   | 196836695 | 3q29   | 198739716 | rat | 1903021  |         |
| 4 | 4p16   | 1151685   | 4p16   | 3792758   | rat | 2641073  | 407714  |
| 4 | 4p16   | 4200472   | 4p16   | 8859586   | rat | 4659114  | 643131  |
| 4 | 4p16   | 9502717   | 4q22   | 89376336  | rat | 79873619 | 200     |
| 4 | 4q22   | 89376536  | 4q22   | 95664969  | rat | 6288433  | 19765   |
| 4 | 4q22   | 95684734  | 4q26   | 121086934 | rat | 25402200 | 245552  |
| 4 | 4q27   | 121332486 | 4q27   | 122837455 | rat | 1504969  | 200     |
| 4 | 4q27   | 122837655 | 4q31.1 | 141655864 | rat | 18818209 | 61932   |
| 4 | 4q31.1 | 141717796 | 4q31.2 | 151353028 | rat | 9635232  | 79895   |

|   |          |           |          |           |     |          |          |
|---|----------|-----------|----------|-----------|-----|----------|----------|
| 4 | 4q31.2   | 151432923 | 4q32     | 163624597 | rat | 12191674 | 353105   |
| 4 | 4q32     | 163977702 | 4q35     | 191375700 | rat | 27397998 |          |
| 5 | 5p15.3   | 1780926   | 5p15.3   | 7932916   | rat | 6151990  | 31041    |
| 5 | 5p15.3   | 7963957   | 5q15     | 96161776  | rat | 88197819 | 53687    |
| 5 | 5q15     | 96215463  | 5q21     | 98424895  | rat | 2209432  | 200      |
| 5 | 5q21     | 98425095  | 5q22     | 110087815 | rat | 11662720 | 242441   |
| 5 | 5q22     | 110330256 | 5q22     | 112325253 | rat | 1994997  | 14451    |
| 5 | 5q22     | 112339704 | 5q23.3   | 130393520 | rat | 18053816 | 121545   |
| 5 | 5q23.3   | 130515065 | 5q31.1   | 134075456 | rat | 3560391  | 29714    |
| 5 | 5q31.1   | 134105170 | 5q31.1   | 137121696 | rat | 3016526  | 135251   |
| 5 | 5q31.1   | 137256947 | 5q32     | 147607546 | rat | 10350599 | 23817    |
| 5 | 5q32     | 147631363 | 5q33.1   | 150210048 | rat | 2578685  | 157741   |
| 5 | 5q33.1   | 150367789 | 5q33.2   | 154317378 | rat | 3949589  | 200      |
| 5 | 5q33.2   | 154317578 | 5q35     | 173646386 | rat | 19328808 | 52040    |
| 5 | 5q35     | 173698426 | 5q35     | 177105027 | rat | 3406601  | 385429   |
| 5 | 5q35     | 177490456 | 5q35     | 180737497 | rat | 3247041  |          |
| 6 | 6p25     | 171329    | 6p22.3   | 20093794  | rat | 19922465 | 33967    |
| 6 | 6p22.3   | 20127761  | 6p22.1   | 29101707  | rat | 8973946  | 39193    |
| 6 | 6p22.1   | 29140900  | 6p21.2   | 39059211  | rat | 9918311  | 270329   |
| 6 | 6p21.2   | 39329540  | 6p12     | 52755093  | rat | 13425553 | 19653    |
| 6 | 6p12     | 52774746  | 6p12     | 55784286  | rat | 3009540  | 442177   |
| 6 | 6p12     | 56226463  | 6q13     | 73859514  | rat | 17633051 | 153949   |
| 6 | 6q13     | 74013463  | 6q14     | 86415489  | rat | 12402026 | 1330106  |
| 6 | 6q14     | 87745595  | 6q16.3   | 100244557 | rat | 12498962 | 383869   |
| 6 | 6q16.3   | 100628426 | 6q22.1   | 116674806 | rat | 16046380 | 262895   |
| 6 | 6q22.1   | 116937701 | 6q22.3   | 123081845 | rat | 6144144  | 35626    |
| 6 | 6q22.3   | 123117471 | 6q22.3   | 127848358 | rat | 4730887  | 100538   |
| 6 | 6q22.3   | 127948896 | 6q23.2   | 135138941 | rat | 7190045  | 18172    |
| 6 | 6q23.2   | 135157113 | 6q25.1   | 150165506 | rat | 15008393 | 1129     |
| 6 | 6q25.1   | 150166635 | 6q27     | 170557912 | rat | 20391277 |          |
| 7 | 7p22     | 150540    | 7p22     | 5502967   | rat | 5352427  | 1298498  |
| 7 | 7p22     | 6801465   | 7p21     | 12240731  | rat | 5439266  | 34202    |
| 7 | 7p21     | 12274933  | 7p21     | 19459102  | rat | 7184169  | 4658     |
| 7 | 7p21     | 19463760  | 7p15.3   | 22306265  | rat | 2842505  | 657862   |
| 7 | 7p15.3   | 22964127  | 7p14     | 32734941  | rat | 9770814  | 200      |
| 7 | 7p14     | 32735141  | 7p14     | 36046504  | rat | 3311363  | 184634   |
| 7 | 7p14     | 36231138  | 7p13     | 43312412  | rat | 7081274  | 310633   |
| 7 | 7p13     | 43623045  | 7p11.2   | 55012427  | rat | 11389382 | 11193798 |
| 7 | 7q11.2.1 | 66206225  | 7q11.2.3 | 71402623  | rat | 5196398  | 722214   |
| 7 | 7q11.2.3 | 72124837  | 7q11.2.3 | 73887786  | rat | 1762949  | 2528151  |
| 7 | 7q11.2.3 | 76415937  | 7q21.3   | 97029493  | rat | 20613556 | 236256   |
| 7 | 7q21.3   | 97265749  | 7q22     | 99027359  | rat | 1761610  | 2935930  |
| 7 | 7q22     | 101963289 | 7q22     | 104742436 | rat | 2779147  | 13043    |
| 7 | 7q22     | 104755479 | 7q31.1   | 107320004 | rat | 2564525  | 2856     |
| 7 | 7q31.1   | 107322860 | 7q31.1   | 111678926 | rat | 4356066  | 7417     |
| 7 | 7q31.1   | 111686343 | 7q36     | 149864544 | rat | 38178201 | 38834    |
| 7 | 7q36     | 149903378 | 7q36     | 156529297 | rat | 6625919  | 24065    |
| 7 | 7q36     | 156553362 | 7q36     | 158237917 | rat | 1684555  |          |
| 8 | 8p23.3   | 510046    | 8p23.1   | 7500178   | rat | 6990132  | 481710   |
| 8 | 8p23.1   | 7981888   | 8p23.1   | 9510886   | rat | 1528998  | 68406    |
| 8 | 8p23.1   | 9579292   | 8p23.1   | 11711648  | rat | 2132356  | 643897   |
| 8 | 8p23.1   | 12355545  | 8p22     | 17763927  | rat | 5408382  | 38383    |
| 8 | 8p22     | 17802310  | 8p21     | 19985979  | rat | 2183669  | 22305    |
| 8 | 8p21     | 20008284  | 8p12     | 28970543  | rat | 8962259  | 40514    |
| 8 | 8p12     | 29011057  | 8p12     | 36492063  | rat | 7481006  | 4200     |
| 8 | 8p12     | 36496263  | 8p12     | 37734651  | rat | 1238388  | 200      |
| 8 | 8p12     | 37734851  | 8p11.2   | 42229687  | rat | 4494836  | 8160578  |
| 8 | 8q11.2   | 50390265  | 8q12     | 62410873  | rat | 12020608 | 6557     |

|    |          |           |          |           |     |          |          |
|----|----------|-----------|----------|-----------|-----|----------|----------|
| 8  | 8q12     | 62417430  | 8q12     | 63721790  | rat | 1304360  | 84653    |
| 8  | 8q12     | 63806443  | 8q13     | 67053743  | rat | 3247300  | 200      |
| 8  | 8q13     | 67053943  | 8q21.1   | 75892926  | rat | 8838983  | 28363    |
| 8  | 8q21.1   | 75921289  | 8q21.2   | 86714895  | rat | 10793606 | 7629     |
| 8  | 8q21.2   | 86722524  | 8q22.1   | 96911668  | rat | 10189144 | 4856     |
| 8  | 8q22.1   | 96916524  | 8q24.3   | 145731624 | rat | 48815100 |          |
| 9  | 9p24     | 195689    | 9p24     | 6655150   | rat | 6459461  | 77984    |
| 9  | 9p24     | 6733134   | 9p21     | 27287159  | rat | 20554025 | 27931    |
| 9  | 9p21     | 27315090  | 9p13     | 38461949  | rat | 11146859 | 25821090 |
| 9  | 9q13     | 64283039  | 9q21.2   | 76347373  | rat | 12064334 | 216375   |
| 9  | 9q21.2   | 76563748  | 9q21.3   | 79693982  | rat | 3130234  | 99125    |
| 9  | 9q21.3   | 79793107  | 9q21.3   | 83878609  | rat | 4085502  | 247191   |
| 9  | 9q21.3   | 84125800  | 9q22.2   | 88142780  | rat | 4016980  | 159455   |
| 9  | 9q22.1   | 88302235  | 9q22.2   | 90365402  | rat | 2063167  | 283313   |
| 9  | 9q22.2   | 90648715  | 9q22.3   | 93280543  | rat | 2631828  | 215751   |
| 9  | 9q22.3   | 93496294  | 9q33     | 116942049 | rat | 23445755 | 52881    |
| 9  | 9q33     | 116994930 | 9q33     | 121405175 | rat | 4410245  | 562      |
| 9  | 9q33     | 121405737 | 9q33     | 124512769 | rat | 3107032  | 20241    |
| 9  | 9q33     | 124533010 | 9q34.1   | 127758645 | rat | 3225635  | 89421    |
| 9  | 9q34.1   | 127848066 | 9q34.1   | 129385133 | rat | 1537067  | 69066    |
| 9  | 9q34.1   | 129454199 | 9q34.1   | 131919050 | rat | 2464851  | 42997    |
| 9  | 9q34.1   | 131962047 | 9q34.2   | 134317723 | rat | 2355676  |          |
| 10 | 10p15    | 128903    | 10p12.1  | 27676319  | rat | 27547416 | 61196    |
| 10 | 10p12.1  | 27737515  | 10p12.1  | 29062258  | rat | 1324743  | 844647   |
| 10 | 10p11.2  | 29906905  | 10p11.2  | 31026991  | rat | 1120086  | 76616    |
| 10 | 10p11.2  | 31103607  | 10p11.2  | 32605919  | rat | 1502312  | 289294   |
| 10 | 10p11.2  | 32895213  | 10p11.2  | 35324029  | rat | 2428816  | 446576   |
| 10 | 10p11.2  | 35770605  | 10p11.2  | 37244664  | rat | 1474059  | 5823396  |
| 10 | 10q11.2  | 43068060  | 10q11.2  | 46002988  | rat | 2934928  | 479655   |
| 10 | 10q11.2  | 46482643  | 10q11.2  | 51472743  | rat | 4990100  | 422617   |
| 10 | 10q11.2  | 51895360  | 10q21.1  | 54432491  | rat | 2537131  | 617385   |
| 10 | 10q21.1  | 55049876  | 10q21.3  | 68040493  | rat | 12990617 | 104644   |
| 10 | 10q21.3  | 68145137  | 10q22.1  | 70347467  | rat | 2202330  | 25729    |
| 10 | 10q21.3  | 70373196  | 10q22.1  | 74077294  | rat | 3704098  | 685639   |
| 10 | 10q22.2  | 74762933  | 10q22.3  | 79620307  | rat | 4857374  | 13098    |
| 10 | 10q22.3  | 79633405  | 10q22.3  | 81955638  | rat | 2322233  | 200      |
| 10 | 10q22.3  | 81955838  | 10q23.2  | 89041450  | rat | 7085612  | 350358   |
| 10 | 10q23.3  | 89391808  | 10q24.1  | 99061758  | rat | 9669950  | 362247   |
| 10 | 10q24.2  | 99424005  | 10q24.2  | 101662335 | rat | 2238330  | 101556   |
| 10 | 10q24.2  | 101763891 | 10q26.1  | 121313866 | rat | 19549975 | 200      |
| 10 | 10q26.1  | 121314066 | 10q26.3  | 135319316 | rat | 14005250 |          |
| 11 | 11p15.5  | 1206762   | 11p15.5  | 3213050   | rat | 2006288  | 377291   |
| 11 | 11p15.4  | 3590341   | 11p15.1  | 17406125  | rat | 13815784 | 11208    |
| 11 | 11p15.1  | 17417333  | 11p14    | 25987264  | rat | 8569931  | 259985   |
| 11 | 11p14    | 26247249  | 11q12    | 58011814  | rat | 31764565 | 53955    |
| 11 | 11q12    | 58065769  | 11q13.3  | 71432282  | rat | 13366513 | 417499   |
| 11 | 11q13.4  | 71849781  | 11q14.3  | 89523970  | rat | 17674189 | 521121   |
| 11 | 11q14.3  | 90045091  | 11q22.3  | 106828099 | rat | 16783008 | 658845   |
| 11 | 11q22.3  | 107486944 | 11q25    | 134934771 | rat | 27447827 |          |
| 12 | 12p13.3  | 61065     | 12p13.3  | 2682525   | rat | 2621460  | 100974   |
| 12 | 12p13.3  | 2783499   | 12p13.3  | 9174615   | rat | 6391116  | 107601   |
| 12 | 12p13.3  | 9282216   | 12p11.2  | 30652860  | rat | 21370644 | 7786188  |
| 12 | 12p12    | 38439048  | 12q13.2  | 54965452  | rat | 16526404 | 475826   |
| 12 | 12q13.3  | 55441278  | 12q14    | 56862885  | rat | 1421607  | 86023    |
| 12 | 12q14    | 56948908  | 12q24.1  | 108109650 | rat | 51160742 | 148796   |
| 12 | 12q24.1  | 108258446 | 12q24.1  | 110355800 | rat | 2097354  | 54625    |
| 12 | 12q24.1  | 110410425 | 12q24.31 | 121274782 | rat | 10864357 | 100922   |
| 12 | 12q24.31 | 121375704 | 12q24.33 | 132216098 | rat | 10840394 |          |

|    |          |           |         |           |     |          |          |
|----|----------|-----------|---------|-----------|-----|----------|----------|
| 13 | 13q12.1  | 18706513  | 13q12.1 | 22757233  | rat | 4050720  | 2967160  |
| 13 | 13q12.1  | 25724393  | 13q13   | 33345993  | rat | 7621600  | 55990    |
| 13 | 13q13    | 33401983  | 13q14.1 | 40188271  | rat | 6786288  | 238254   |
| 13 | 13q14.1  | 40426525  | 13q14.2 | 48715417  | rat | 8288892  | 415495   |
| 13 | 13q14.2  | 49130912  | 13q14.3 | 51291706  | rat | 2160794  | 883008   |
| 13 | 13q14.3  | 52174714  | 13q33   | 101917852 | rat | 49743138 | 458672   |
| 13 | 13q33    | 102376524 | 13q34   | 114114599 | rat | 11738075 |          |
| 14 | 14q11.2  | 18307555  | 14q11.2 | 23137497  | rat | 4829942  | 4469     |
| 14 | 14q11.2  | 23141966  | 14q22   | 50241915  | rat | 27099949 | 444943   |
| 14 | 14q21    | 50686858  | 14q22   | 56619173  | rat | 5932315  | 38762    |
| 14 | 14q22    | 56657935  | 14q32.3 | 104300259 | rat | 47642324 |          |
| 15 | 15q11.2  | 22618175  | 15q13   | 26033210  | rat | 3415035  | 774134   |
| 15 | 15q13    | 26807344  | 15q13   | 27946401  | rat | 1139057  | 606694   |
| 15 | 15q13    | 28553095  | 15q13   | 29997953  | rat | 1444858  | 506623   |
| 15 | 15q13    | 30504576  | 15q14   | 32238453  | rat | 1733877  | 277705   |
| 15 | 15q14    | 32516158  | 15q21.1 | 48877128  | rat | 16360970 | 666798   |
| 15 | 15q21.1  | 49543926  | 15q24   | 73600262  | rat | 24056336 | 83677    |
| 15 | 15q24    | 73683939  | 15q24   | 75763740  | rat | 2079801  | 106132   |
| 15 | 15q24    | 75869872  | 15q25   | 77858828  | rat | 1988956  | 17064    |
| 15 | 15q25    | 77875892  | 15q25   | 80152765  | rat | 2276873  | 646833   |
| 15 | 15q25    | 80799598  | 15q25   | 82374406  | rat | 1574808  | 1059203  |
| 15 | 15q25    | 83433609  | 15q25   | 89153038  | rat | 5719429  | 36437    |
| 15 | 15q26.1  | 89189475  | 15q26.3 | 99857350  | rat | 10667875 |          |
| 16 | 16p13.3  | 43893     | 16p13.1 | 15528691  | rat | 15484798 | 1099940  |
| 16 | 16p13.1  | 16628631  | 16p12   | 18203373  | rat | 1574742  | 534908   |
| 16 | 16p12    | 18738281  | 16p11.2 | 31536969  | rat | 12798688 | 14898959 |
| 16 | 16q12.1  | 46435928  | 16q13   | 55602137  | rat | 9166209  | 12562    |
| 16 | 16q13    | 55614699  | 16q22   | 66704022  | rat | 11089323 | 26641    |
| 16 | 16q22    | 66730663  | 16q22   | 69711086  | rat | 2980423  | 152492   |
| 16 | 16q22    | 69863578  | 16q23   | 74093662  | rat | 4230084  | 75779    |
| 16 | 16q23    | 74169441  | 16q24   | 89810196  | rat | 15640755 |          |
| 17 | 17p13    | 1199805   | 17p13   | 4482673   | rat | 3282868  | 42818    |
| 17 | 17p13    | 4525491   | 17p13   | 6691571   | rat | 2166080  | 56816    |
| 17 | 17p13    | 6748387   | 17p11.2 | 21227769  | rat | 14479382 | 4160586  |
| 17 | 17q11.2  | 25388355  | 17q11.2 | 27510680  | rat | 2122325  | 2802602  |
| 17 | 17q12    | 30313282  | 17q12   | 34303780  | rat | 3990498  | 269683   |
| 17 | 17q12    | 34573463  | 17q21.2 | 35922531  | rat | 1349068  | 397358   |
| 17 | 17q21.2  | 36319889  | 17q21.3 | 44302688  | rat | 7982799  | 1608697  |
| 17 | 17q21.3  | 45911385  | 17q23   | 58283088  | rat | 12371703 | 265116   |
| 17 | 17q23    | 58548204  | 17q24   | 60629869  | rat | 2081665  | 88415    |
| 17 | 17q24    | 60718284  | 17q24   | 63138270  | rat | 2419986  | 242548   |
| 17 | 17q24    | 63380818  | 17q24   | 66449451  | rat | 3068633  | 283836   |
| 17 | 17q24    | 66733287  | 17q25   | 81293587  | rat | 14560300 |          |
| 18 | 18p11.32 | 605216    | 18p11.2 | 9962013   | rat | 9356797  | 1696502  |
| 18 | 18p11.2  | 11658515  | 18p11.2 | 13912027  | rat | 2253512  | 4519440  |
| 18 | 18q11.2  | 18431467  | 18q12.3 | 40945714  | rat | 22514247 | 299289   |
| 18 | 18q12.3  | 41245003  | 18q21.3 | 53943062  | rat | 12698059 | 110405   |
| 18 | 18q21.3  | 54053467  | 18q21.3 | 58048268  | rat | 3994801  | 70800    |
| 18 | 18q21.3  | 58119068  | 18q22   | 65639416  | rat | 7520348  | 803808   |
| 18 | 18q22    | 66443224  | 18q23   | 77744767  | rat | 11301543 |          |
| 19 | 19p13.3  | 221430    | 19p13.3 | 4164193   | rat | 3942763  | 2890282  |
| 19 | 19p13.2  | 7054475   | 19p13.2 | 8217968   | rat | 1163493  | 1019786  |
| 19 | 19p13.2  | 9237754   | 19p13.2 | 11509875  | rat | 2272121  | 1092782  |
| 19 | 19p13.2  | 12602657  | 19p13.1 | 14528147  | rat | 1925490  | 263191   |
| 19 | 19p13.1  | 14791338  | 19p13.1 | 15948062  | rat | 1156724  | 79772    |
| 19 | 19p13.1  | 16027834  | 19p13.1 | 19620024  | rat | 3592190  | 13553296 |
| 19 | 19q12    | 33173320  | 19q12   | 34786782  | rat | 1613462  | 200      |
| 19 | 19q12    | 34786982  | 19q13.3 | 53042981  | rat | 18255999 | 434289   |

|    |         |           |         |           |     |          |         |
|----|---------|-----------|---------|-----------|-----|----------|---------|
| 19 | 19q13.3 | 53477270  | 19q13.4 | 56776887  | rat | 3299617  | 2621348 |
| 19 | 19q13.4 | 59398235  | 19q13.4 | 60932972  | rat | 1534737  |         |
| 20 | 20p13   | 16192     | 20p13   | 1390268   | rat | 1374076  | 305615  |
| 20 | 20p13   | 1695883   | 20p11.2 | 23584193  | rat | 21888310 | 6959182 |
| 20 | 20q11.2 | 30543375  | 20q13.3 | 63584301  | rat | 33040926 |         |
| 21 | 21q11.2 | 14421381  | 21q22.3 | 42332141  | rat | 27910760 | 53363   |
| 21 | 21q22.3 | 42385504  | 21q22.3 | 46940182  | rat | 4554678  |         |
| 22 | 22q11.2 | 17931957  | 22q11.2 | 20654635  | rat | 2722678  | 5060167 |
| 22 | 22q12.1 | 25714802  | 22q12.1 | 27480724  | rat | 1765922  | 12420   |
| 22 | 22q12.1 | 27493144  | 22q12.3 | 30824528  | rat | 3331384  | 1168058 |
| 22 | 22q12.3 | 31992586  | 22q12.3 | 34221854  | rat | 2229268  | 19440   |
| 22 | 22q12.3 | 34241294  | 22q13.3 | 49309226  | rat | 15067932 |         |
| X  | Xp22.2  | 9318225   | Xp22.11 | 23022644  | rat | 13704419 | 30269   |
| X  | Xp22.11 | 23052913  | Xp21.1  | 36161279  | rat | 13108366 | 53642   |
| X  | Xp21.1  | 36214921  | Xp11.3  | 46346466  | rat | 10131545 | 553547  |
| X  | Xp11.3  | 46900013  | Xp11.23 | 48894439  | rat | 1994426  | 2864587 |
| X  | Xp11.22 | 51759026  | Xp11.21 | 55750419  | rat | 3991393  | 5049672 |
| X  | Xq11.2  | 60800091  | Xq22.3  | 105353823 | rat | 44553732 | 82426   |
| X  | Xq22.3  | 105436249 | Xq23    | 113262020 | rat | 7825771  | 151359  |
| X  | Xq23    | 113413379 | Xq25    | 123820873 | rat | 10407494 | 219917  |
| X  | Xq25    | 124040790 | Xq28    | 151414871 | rat | 27374081 |         |
