# Supplementary material for: Is mammalian chromosomal evolution driven by regions of genome fragility?
Source: PubMed Central journal article supplement (PMC1794428; doi:10.1186/gb-2006-7-12-r115), 2006-12-08
Supplement: gb-2006-7-12-r115-S5.pdf [file gb-2006-7-12-r115-S5.pdf]

**Table S2:** List representing the evolutionary breakpoint regions (EBR) less than 4Mb and their chromosomal position in the human genome.

| Human chr | from (band) | from (bp) | to (band) | to (bp)   | species | EBR's size |
|-----------|-------------|-----------|-----------|-----------|---------|------------|
| 1         | 1q23        | 161580755 | 1q24      | 164095901 | cat     | 2515146    |
| 1         | 1q31        | 182950099 | 1q31      | 186338948 | cat     | 3388849    |
| 1         | 1q42        | 224722192 | 1q42      | 225692983 | cat     | 970791     |
| 2         | 2p22        | 35873540  | 2p22      | 39066275  | cat     | 3192735    |
| 3         | 3p24        | 17806005  | 3p24      | 19362170  | cat     | 1556165    |
| 3         | 3p21.2      | 51753995  | 3p21.2    | 53050080  | cat     | 1296085    |
| 5         | 5q11.2      | 52508337  | 5q11.2    | 54691047  | cat     | 2182710    |
| 5         | 5q13.2      | 70405708  | 5q13.3    | 74019724  | cat     | 3614016    |
| 5         | 5q32        | 145444492 | 5q32      | 148190997 | cat     | 2746505    |
| 6         | 6p22.1      | 28564483  | 6p22.1    | 29926866  | cat     | 1362383    |
| 6         | 6q15        | 88825718  | 6q16.1    | 92138810  | cat     | 3313092    |
| 7         | 7q22        | 101473628 | 7q22      | 103882428 | cat     | 2408800    |
| 10        | 10p12.3     | 17429831  | 10p12.3   | 18579845  | cat     | 1150014    |
| 10        | 10q24.3     | 102403107 | 10q24.3   | 104718952 | cat     | 2315845    |
| 10        | 10q24.3     | 106017367 | 10q25.1   | 108657106 | cat     | 2639739    |
| 11        | 11p15.5     | 2829324   | 11p15.4   | 5205733   | cat     | 2376409    |
| 11        | 11p13       | 32496231  | 11p13     | 32890555  | cat     | 394324     |
| 11        | 11q13.3     | 68958076  | 11q13.4   | 72389623  | cat     | 3431547    |
| 11        | 11q22.1     | 101035333 | 11q22.2   | 102425313 | cat     | 1389980    |
| 15        | 15q13       | 27070326  | 15q13     | 27572440  | cat     | 502114     |
| 15        | 15q24       | 74939446  | 15q24     | 76132408  | cat     | 1192962    |
| 15        | 15q25       | 81314475  | 15q25     | 84268789  | cat     | 2954314    |
| 17        | 17q21.3     | 41186169  | 17q21.3   | 42293302  | cat     | 1107133    |
| 17        | 17q23       | 59679495  | 17q24     | 62335374  | cat     | 2655879    |
| 19        | 19p13.1     | 19314097  | 19p12     | 22153700  | cat     | 2839603    |
| 19        | 19q13.3     | 55108809  | 19q13.4   | 59061575  | cat     | 3952766    |
| 22        | 22q12.3     | 30831199  | 22q12.3   | 32688487  | cat     | 1857288    |
| 22        | 22q13.1     | 37884099  | 22q13.2   | 40724570  | cat     | 2840471    |
| 1         | 1p36.3      | 657101    | 1p36.3    | 659326    | cattle  | 2225       |
| 1         | 1p36.3      | 659491    | 1p36.3    | 1185659   | cattle  | 526168     |
| 1         | 1p36.2      | 15066499  | 1p36.1    | 15996102  | cattle  | 929603     |
| 1         | 1p35        | 32178408  | 1p35      | 32828690  | cattle  | 650282     |
| 1         | 1p35        | 32856534  | 1p34.3    | 35070436  | cattle  | 2213902    |
| 1         | 1p34.3      | 36041724  | 1p34.3    | 38920455  | cattle  | 2878731    |
| 1         | 1q24        | 164602310 | 1q24      | 166355840 | cattle  | 1753530    |
| 1         | 1q24        | 166559098 | 1q24      | 168061951 | cattle  | 1502853    |
| 1         | 1q24        | 168143429 | 1q25      | 170027236 | cattle  | 1883807    |
| 1         | 1q25        | 180080269 | 1q31      | 182785859 | cattle  | 2705590    |
| 1         | 1q31        | 189622181 | 1q31      | 193593332 | cattle  | 3971151    |
| 1         | 1q32        | 198313571 | 1q32      | 199519571 | cattle  | 1206000    |
| 1         | 1q32        | 203961724 | 1q32      | 204701027 | cattle  | 739303     |
| 1         | 1q42        | 223312565 | 1q42      | 224655903 | cattle  | 1343338    |
| 1         | 1q42        | 224672451 | 1q42      | 224713326 | cattle  | 40875      |
| 1         | 1q42        | 224980083 | 1q42      | 226676144 | cattle  | 1696061    |
| 1         | 1q43        | 236369146 | 1q43      | 237235402 | cattle  | 866256     |
| 1         | 1q43        | 237817065 | 1q43      | 238368064 | cattle  | 550999     |
| 1         | 1q44        | 241073844 | 1q44      | 245030235 | cattle  | 3956391    |
| 2         | 2p23        | 31448970  | 2p23      | 31515982  | cattle  | 67012      |
| 2         | 2p22        | 33582120  | 2p22      | 37386420  | cattle  | 3804300    |
| 2         | 2p16        | 51217330  | 2p16      | 54711216  | cattle  | 3493886    |
| 2         | 2p16        | 58344712  | 2p15      | 61372309  | cattle  | 3027597    |
| 2         | 2p14        | 67595383  | 2p13      | 69926836  | cattle  | 2331453    |

|   |         |           |        |           |        |         |
|---|---------|-----------|--------|-----------|--------|---------|
| 2 | 2p13    | 70274004  | 2p13   | 70465664  | cattle | 191660  |
| 2 | 2p13    | 70466012  | 2p13   | 71516603  | cattle | 1050591 |
| 2 | 2p13    | 74400121  | 2p13   | 74643151  | cattle | 243030  |
| 2 | 2p13    | 74714596  | 2p12   | 75677152  | cattle | 962556  |
| 2 | 2p12    | 75816416  | 2p12   | 79341841  | cattle | 3525425 |
| 2 | 2p11.2  | 85513118  | 2p11.2 | 85733916  | cattle | 220798  |
| 2 | 2q13    | 111831391 | 2q13   | 113438308 | cattle | 1606917 |
| 2 | 2q13    | 113867305 | 2q14.1 | 114554351 | cattle | 687046  |
| 2 | 2q21.1  | 131827274 | 2q21.3 | 135235659 | cattle | 3408385 |
| 2 | 2q32.2  | 188294465 | 2q32.2 | 191033384 | cattle | 2738919 |
| 2 | 2q32.2  | 191148604 | 2q32.2 | 191172219 | cattle | 23615   |
| 2 | 2q32.2  | 191200413 | 2q32.2 | 191265044 | cattle | 64631   |
| 2 | 2q32.2  | 191337954 | 2q32.2 | 191797784 | cattle | 459830  |
| 2 | 2q36    | 224431140 | 2q36   | 228300887 | cattle | 3869747 |
| 2 | 2q37.1  | 232637976 | 2q37.1 | 234232819 | cattle | 1594843 |
| 2 | 2q37.3  | 242142249 | 2q37.3 | 242637815 | cattle | 495566  |
| 2 | 2q37.3  | 242639521 | 2q37.3 | 243071390 | cattle | 431869  |
| 3 | 3p25    | 10160699  | 3p25   | 11286246  | cattle | 1125547 |
| 3 | 3p25    | 11296261  | 3p25   | 15288218  | cattle | 3991957 |
| 3 | 3p22    | 40167131  | 3p22   | 42442574  | cattle | 2275443 |
| 3 | 3p22    | 42528308  | 3p21.3 | 45550087  | cattle | 3021779 |
| 3 | 3q21    | 126014321 | 3q21   | 128598894 | cattle | 2584573 |
| 3 | 3q21    | 130535798 | 3q21   | 131700576 | cattle | 1164778 |
| 3 | 3q21    | 131701180 | 3q21   | 131894446 | cattle | 193266  |
| 3 | 3q22    | 137949578 | 3q22   | 139944679 | cattle | 1995101 |
| 4 | 4p16    | 657757    | 4p16   | 4262159   | cattle | 3604402 |
| 4 | 4p16    | 5815903   | 4p16   | 6710544   | cattle | 894641  |
| 4 | 4p15.3  | 17202205  | 4p15.3 | 19943231  | cattle | 2741026 |
| 4 | 4q22    | 88978287  | 4q22   | 89113522  | cattle | 135235  |
| 4 | 4q26    | 120943179 | 4q27   | 123569220 | cattle | 2626041 |
| 4 | 4q32    | 156604414 | 4q32   | 157100884 | cattle | 496470  |
| 5 | 5q14    | 80647195  | 5q14   | 80664539  | cattle | 17344   |
| 5 | 5q23.3  | 132144366 | 5q23.3 | 132242576 | cattle | 98210   |
| 5 | 5q32    | 146444172 | 5q32   | 149764362 | cattle | 3320190 |
| 5 | 5q34    | 161261955 | 5q34   | 162800120 | cattle | 1538165 |
| 5 | 5q35    | 176658350 | 5q35   | 176747058 | cattle | 88708   |
| 6 | 6p21.3  | 32560586  | 6p21.3 | 32604636  | cattle | 2485960 |
| 6 | 6q22.1  | 116447426 | 6q22.1 | 117882140 | cattle | 1434714 |
| 6 | 6q22.3  | 127599865 | 6q22.3 | 129139472 | cattle | 1539607 |
| 7 | 7p15.3  | 23274348  | 7p15.2 | 26039787  | cattle | 2765439 |
| 7 | 7p11.2  | 55488695  | 7p11.2 | 55740033  | cattle | 251338  |
| 7 | 7q11.23 | 75845912  | 7q21.1 | 79362390  | cattle | 3516478 |
| 7 | 7q21.3  | 96967711  | 7q22   | 97844204  | cattle | 876493  |
| 7 | 7q22    | 100328878 | 7q22   | 103313520 | cattle | 2984642 |
| 8 | 8p23.1  | 11567741  | 8p22   | 12716064  | cattle | 1148323 |
| 8 | 8p22    | 12909249  | 8p22   | 15740582  | cattle | 2831333 |
| 8 | 8p22    | 17751798  | 8p22   | 19070977  | cattle | 1319179 |
| 8 | 8p21    | 19269574  | 8p21   | 19606071  | cattle | 336497  |
| 8 | 8p21    | 28021411  | 8p12   | 30856388  | cattle | 2834977 |
| 8 | 8q11.2  | 52071773  | 8q11.2 | 53258203  | cattle | 1186430 |
| 8 | 8q12    | 59218602  | 8q12   | 59441162  | cattle | 222560  |
| 8 | 8q21.1  | 82118658  | 8q21.1 | 82293375  | cattle | 174717  |
| 8 | 8q22.3  | 103242039 | 8q22.3 | 104079660 | cattle | 837621  |
| 8 | 8q23    | 117447292 | 8q24.1 | 118201750 | cattle | 754458  |
| 8 | 8q24.1  | 120105393 | 8q24.1 | 120411813 | cattle | 306420  |
| 8 | 8q24.1  | 120513872 | 8q24.1 | 122294338 | cattle | 1780466 |
| 9 | 9p21    | 32563350  | 9p21   | 33094081  | cattle | 530731  |
| 9 | 9q21.3  | 79831533  | 9q21.3 | 81194075  | cattle | 1362542 |

|    |         |           |         |           |         |         |
|----|---------|-----------|---------|-----------|---------|---------|
| 9  | 9q21.3  | 81194393  | 9q21.3  | 84136387  | cattle  | 2941994 |
| 10 | 10p11.2 | 30174969  | 10p11.2 | 33189173  | cattle  | 3014204 |
| 10 | 10p11.2 | 33189252  | 10p11.2 | 33857582  | cattle  | 668330  |
| 10 | 10p11.2 | 36080601  | 10q11.2 | 38496809  | cattle  | 2416208 |
| 10 | 10q11.2 | 43537563  | 10q11.2 | 44640810  | cattle  | 1103247 |
| 10 | 10q11.2 | 51023128  | 10q11.2 | 51958757  | cattle  | 935629  |
| 10 | 10q11.2 | 51959007  | 10q21.1 | 53349423  | cattle  | 1390416 |
| 10 | 10q21.1 | 58013421  | 10q21.2 | 61680561  | cattle  | 3667140 |
| 11 | 11p15.5 | 2972880   | 11p15.4 | 3606922   | cattle  | 634042  |
| 11 | 11p15.1 | 18086368  | 11p15.1 | 18339499  | cattle  | 253131  |
| 11 | 11p14   | 23516713  | 11p14   | 26370088  | cattle  | 2853375 |
| 11 | 11q12   | 59884931  | 11q12   | 60909075  | cattle  | 1024144 |
| 11 | 11q13.3 | 68708644  | 11q13.4 | 71865223  | cattle  | 3156579 |
| 11 | 11q13.5 | 76385891  | 11q14.1 | 77443084  | cattle  | 1057193 |
| 11 | 11q14.1 | 79558251  | 11q14.1 | 80850130  | cattle  | 1291879 |
| 11 | 11q14.1 | 82834337  | 11q14.1 | 83392819  | cattle  | 558482  |
| 11 | 11q22.3 | 104299321 | 11q22.3 | 107647966 | cattle  | 3348645 |
| 11 | 11q24   | 122966757 | 11q24   | 124671025 | cattle  | 1704268 |
| 12 | 12q13.2 | 54689770  | 12q13.3 | 55795103  | cattle  | 1105333 |
| 12 | 12q22   | 93768986  | 12q23   | 96596135  | cattle  | 2827149 |
| 13 | 13q12.1 | 20824838  | 13q12.1 | 20858048  | cattle  | 33210   |
| 14 | 14q21   | 48573670  | 14q22   | 51010044  | cattle  | 2436374 |
| 14 | 14q22   | 51093480  | 14q22   | 51314031  | cattle  | 220551  |
| 15 | 15q13   | 26034151  | 15q13   | 27140673  | cattle  | 1106522 |
| 15 | 15q15   | 41092619  | 15q15   | 41244346  | cattle  | 151727  |
| 15 | 15q15   | 41673925  | 15q15   | 42582853  | cattle  | 908928  |
| 15 | 15q22.3 | 62574353  | 15q22.3 | 63482603  | cattle  | 908250  |
| 15 | 15q23   | 70139318  | 15q24   | 72711998  | cattle  | 2572680 |
| 15 | 15q25   | 80399292  | 15q25   | 83879506  | cattle  | 3480214 |
| 16 | 16q22   | 69496123  | 16q22   | 69883602  | cattle  | 387479  |
| 16 | 16q23   | 70570481  | 16q22   | 71660730  | cattle  | 1090249 |
| 16 | 16q23   | 72828038  | 16q23   | 74224531  | cattle  | 1396493 |
| 17 | 17q11.2 | 26647099  | 17q11.2 | 27236434  | cattle  | 589335  |
| 17 | 17q21.3 | 40823819  | 17q21.3 | 43206153  | cattle  | 2382334 |
| 17 | 17q21.3 | 43206254  | 17q21.3 | 45950561  | cattle  | 2744307 |
| 17 | 17q23   | 59812060  | 17q24   | 62245622  | cattle  | 2433562 |
| 17 | 17q24   | 62956701  | 17q24   | 64625694  | cattle  | 1668993 |
| 18 | 18q21.1 | 28824451  | 18q12.2 | 32803951  | cattle  | 3979500 |
| 18 | 18q12.3 | 40737968  | 18q21.1 | 44278910  | cattle  | 3540942 |
| 18 | 18q22   | 60432639  | 18q22   | 61339916  | cattle  | 907277  |
| 19 | 19p13.3 | 752327    | 19p13.3 | 765097    | cattle  | 12770   |
| 19 | 19p13.3 | 1921309   | 19p13.3 | 2209523   | cattle  | 288214  |
| 19 | 19p13.3 | 5093605   | 19p13.2 | 7879606   | cattle  | 2786001 |
| 19 | 19p13.1 | 12837529  | 19p13.1 | 13109089  | cattle  | 271560  |
| 19 | 19q12   | 34380163  | 19q12   | 34773239  | cattle  | 393076  |
| 20 | 20p13   | 367193    | 20p13   | 2587041   | cattle  | 2219848 |
| 20 | 20p12   | 5854003   | 20p12   | 8061296   | cattle  | 2207293 |
| 20 | 20p12   | 16670419  | 20p12   | 17422551  | cattle  | 752132  |
| 21 | 21q22.1 | 34224306  | 21q22.1 | 36362691  | cattle  | 2138385 |
| 22 | 22q11.2 | 16685103  | 22q11.2 | 17274763  | cattle  | 589660  |
| 22 | 22q11.2 | 22451056  | 22q11.2 | 23920379  | cattle  | 1469323 |
| 22 | 22q12.2 | 30013052  | 22q12.3 | 31522195  | cattle  | 1509143 |
| 22 | 22q12.3 | 35668902  | 22q13.1 | 36413032  | cattle  | 744130  |
| 22 | 22q13.1 | 36413528  | 22q13.1 | 36929737  | cattle  | 516209  |
| X  | Xq23    | 112920937 | Xq23    | 115836971 | cattle  | 2916034 |
| 1  | 1p36.2  | 8014674   | 1p36.2  | 8346713   | chicken | 332039  |
| 1  | 1p36.1  | 19966204  | 1p36.1  | 22150205  | chicken | 2184001 |
| 1  | 1p36.1  | 23037279  | 1p36.1  | 23091673  | chicken | 54394   |

|   |        |           |        |           |         |         |
|---|--------|-----------|--------|-----------|---------|---------|
| 1 | 1p36.1 | 26808478  | 1p36.1 | 26837169  | chicken | 28691   |
| 1 | 1p35   | 31511526  | 1p35   | 31758146  | chicken | 246620  |
| 1 | 1p34.3 | 39001878  | 1p34.3 | 39215721  | chicken | 213843  |
| 1 | 1p34.2 | 40232231  | 1p34.2 | 40993243  | chicken | 761012  |
| 1 | 1p34.2 | 42132810  | 1p34.2 | 43282699  | chicken | 1149889 |
| 1 | 1p31.2 | 66552275  | 1p31.1 | 69937886  | chicken | 3385611 |
| 1 | 1p31.1 | 75478444  | 1p31.1 | 76252436  | chicken | 773992  |
| 1 | 1p21   | 103834130 | 1p21   | 103943595 | chicken | 109465  |
| 1 | 1p13   | 109278244 | 1p13   | 110261632 | chicken | 983388  |
| 1 | 1p13   | 110944090 | 1p13   | 111697982 | chicken | 753892  |
| 1 | 1p13   | 115305369 | 1p13   | 115905892 | chicken | 600523  |
| 1 | 1q23   | 158771765 | 1q23   | 160128230 | chicken | 1356465 |
| 1 | 1q32   | 197561509 | 1q32   | 197836333 | chicken | 274824  |
| 1 | 1q32   | 199875897 | 1q32   | 200006028 | chicken | 130131  |
| 1 | 1q32   | 200444937 | 1q32   | 200809296 | chicken | 364359  |
| 1 | 1q32   | 206363172 | 1q32   | 206391780 | chicken | 28608   |
| 1 | 1q42   | 222902670 | 1q42   | 223126024 | chicken | 223354  |
| 1 | 1q42   | 223813187 | 1q42   | 224413065 | chicken | 599878  |
| 1 | 1q42   | 224873215 | 1q42   | 225713607 | chicken | 840392  |
| 2 | 2p23   | 24462884  | 2p23   | 25686209  | chicken | 1223325 |
| 2 | 2p23   | 27784720  | 2p23   | 27787939  | chicken | 3219    |
| 2 | 2p23   | 28551956  | 2p23   | 28950505  | chicken | 398549  |
| 2 | 2p23   | 31402964  | 2p22   | 32414612  | chicken | 1011648 |
| 2 | 2p22   | 38353401  | 2p22   | 38353401  | chicken | 0       |
| 2 | 2p22   | 40844899  | 2p21   | 42015962  | chicken | 1171063 |
| 2 | 2p21   | 47378320  | 2p16   | 47921948  | chicken | 543628  |
| 2 | 2p16   | 53253989  | 2p16   | 53839013  | chicken | 585024  |
| 2 | 2p15   | 61677308  | 2p15   | 62627954  | chicken | 950646  |
| 2 | 2p13   | 68716960  | 2p13   | 68913541  | chicken | 196581  |
| 2 | 2p13   | 69695825  | 2p13   | 71737158  | chicken | 2041333 |
| 2 | 2p13   | 73432621  | 2p12   | 76250211  | chicken | 2817590 |
| 2 | 2p12   | 77699659  | 2p12   | 79996688  | chicken | 2297029 |
| 2 | 2q13   | 109734101 | 2q13   | 112246145 | chicken | 2512044 |
| 2 | 2q13   | 112807186 | 2q14.1 | 114187516 | chicken | 1380330 |
| 2 | 2q14.2 | 120089519 | 2q14.2 | 120283518 | chicken | 193999  |
| 2 | 2q14.3 | 127356291 | 2q14.3 | 127892208 | chicken | 535917  |
| 2 | 2q21.1 | 131738252 | 2q21.2 | 133004690 | chicken | 1266438 |
| 2 | 2q24.2 | 160450291 | 2q24.2 | 160487086 | chicken | 36795   |
| 2 | 2q33   | 208730414 | 2q34   | 210269529 | chicken | 1539115 |
| 2 | 2q35   | 216408870 | 2q35   | 216786189 | chicken | 377319  |
| 2 | 2q35   | 220332157 | 2q35   | 220370817 | chicken | 38660   |
| 2 | 2q36   | 230759214 | 2q37.1 | 231747104 | chicken | 987890  |
| 2 | 2q37.1 | 233271732 | 2q37.1 | 233323309 | chicken | 51577   |
| 2 | 2q37.1 | 234162762 | 2q37.2 | 236302959 | chicken | 2140197 |
| 2 | 2q37.3 | 239853848 | 2q37.3 | 241376637 | chicken | 1522789 |
| 3 | 3p25   | 9401361   | 3p25   | 9439480   | chicken | 38119   |
| 3 | 3p25   | 9968818   | 3p25   | 10342507  | chicken | 373689  |
| 3 | 3p25   | 13896319  | 3p25   | 13896319  | chicken | 0       |
| 3 | 3p25   | 15112644  | 3p25   | 15467794  | chicken | 355150  |
| 3 | 3p23   | 32805550  | 3p23   | 32969907  | chicken | 164357  |
| 3 | 3p22   | 37067234  | 3p22   | 37069490  | chicken | 2256    |
| 3 | 3p22   | 37840031  | 3p22   | 37952849  | chicken | 112818  |
| 3 | 3p22   | 39170169  | 3p22   | 40886019  | chicken | 1715850 |
| 3 | 3p22   | 42280144  | 3p22   | 42547254  | chicken | 769103  |
| 3 | 3p22   | 42892325  | 3p22   | 43049247  | chicken | 156922  |
| 3 | 3p21.3 | 46425544  | 3p21.3 | 46920035  | chicken | 1774797 |
| 3 | 3p21.3 | 48200341  | 3p21.3 | 48200341  | chicken | 0       |
| 3 | 3p21.3 | 49188285  | 3p21.3 | 49522833  | chicken | 334548  |

|   |         |           |         |           |         |         |
|---|---------|-----------|---------|-----------|---------|---------|
| 3 | 3p21.2  | 52454845  | 3p21.2  | 53234673  | chicken | 779828  |
| 3 | 3p12    | 75384120  | 3p12    | 75956823  | chicken | 572703  |
| 3 | 3p12    | 87417864  | 3q11.2  | 88187166  | chicken | 769302  |
| 3 | 3q11.2  | 98986611  | 3q12    | 100557426 | chicken | 1570815 |
| 3 | 3q13.2  | 113163762 | 3q13.2  | 113733923 | chicken | 570161  |
| 3 | 3q13.3  | 122746458 | 3q21    | 123455464 | chicken | 709006  |
| 3 | 3q21    | 123668981 | 3q21    | 123941865 | chicken | 272884  |
| 3 | 3q21    | 126784631 | 3q21    | 127934594 | chicken | 1149963 |
| 3 | 3q21    | 130016373 | 3q21    | 130086108 | chicken | 69735   |
| 3 | 3q21    | 130373357 | 3q21    | 130582775 | chicken | 209418  |
| 3 | 3q21    | 131030058 | 3q21    | 131577718 | chicken | 547660  |
| 3 | 3q22    | 134860720 | 3q22    | 135007407 | chicken | 146687  |
| 3 | 3q22    | 137100488 | 3q22    | 137202915 | chicken | 102427  |
| 3 | 3q22    | 137832526 | 3q22    | 138240587 | chicken | 408061  |
| 3 | 3q23    | 142267635 | 3q23    | 142586595 | chicken | 318960  |
| 3 | 3q24    | 146396455 | 3q24    | 147641798 | chicken | 1245343 |
| 3 | 3q24    | 149667183 | 3q24    | 150194528 | chicken | 527345  |
| 3 | 3q27    | 184542346 | 3q27    | 188427232 | chicken | 3884886 |
| 3 | 3q29    | 195890199 | 3q29    | 197538979 | chicken | 1648780 |
| 4 | 4p16    | 951495    | 4p16    | 1137188   | chicken | 185693  |
| 4 | 4q12    | 57166633  | 4q12    | 58433224  | chicken | 1266591 |
| 4 | 4q21.1  | 78344753  | 4q21.2  | 79491790  | chicken | 1147037 |
| 4 | 4q21.2  | 79819632  | 4q21.2  | 79930793  | chicken | 111161  |
| 4 | 4q21.2  | 86138934  | 4q22    | 89661448  | chicken | 3522514 |
| 4 | 4q22    | 95596429  | 4q22    | 95801442  | chicken | 205013  |
| 4 | 4q28    | 128763245 | 4q28    | 128921862 | chicken | 158617  |
| 4 | 4q28    | 130154003 | 4q28    | 130459253 | chicken | 305250  |
| 4 | 4q31.3  | 153767367 | 4q31.3  | 154430962 | chicken | 663595  |
| 4 | 4q33    | 171049735 | 4q34    | 172309677 | chicken | 1259942 |
| 4 | 4q35    | 186718890 | 4q35    | 186725597 | chicken | 6707    |
| 5 | 5p15.3  | 1147393   | 5p15.3  | 1254573   | chicken | 107180  |
| 5 | 5p15.3  | 4902020   | 5p15.3  | 6425621   | chicken | 1523601 |
| 5 | 5q11.2  | 53553691  | 5q11.2  | 54587880  | chicken | 1034189 |
| 5 | 5q13.2  | 68600910  | 5q13.2  | 71465693  | chicken | 2864783 |
| 5 | 5q13.3  | 76313068  | 5q14    | 78609427  | chicken | 2296359 |
| 5 | 5q14    | 79534645  | 5q14    | 79734295  | chicken | 199650  |
| 5 | 5q14    | 86265663  | 5q14    | 88112736  | chicken | 1847073 |
| 5 | 5q15    | 95873089  | 5q15    | 96339834  | chicken | 466745  |
| 5 | 5q23.3  | 128192279 | 5q23.3  | 130787504 | chicken | 2595225 |
| 5 | 5q33.3  | 158645657 | 5q33.3  | 159275973 | chicken | 630316  |
| 6 | 6p22.2  | 24704874  | 6p22.3  | 24758995  | chicken | 54121   |
| 6 | 6p22.2  | 25809635  | 6p22.2  | 25834111  | chicken | 24476   |
| 6 | 6p21.3  | 35546505  | 6p21.3  | 35549360  | chicken | 2855    |
| 6 | 6p21.3  | 36308562  | 6p21.2  | 37429617  | chicken | 1121055 |
| 6 | 6p21.1  | 41039056  | 6p21.1  | 41447825  | chicken | 408769  |
| 6 | 6p21.1  | 42153061  | 6p21.1  | 42557986  | chicken | 404925  |
| 6 | 6p21.1  | 42944344  | 6p21.1  | 43082229  | chicken | 137885  |
| 6 | 6p21.1  | 43300164  | 6p21.1  | 43411718  | chicken | 111554  |
| 6 | 6p21.1  | 44388292  | 6p21.1  | 44463388  | chicken | 75096   |
| 6 | 6p12    | 52489510  | 6p12    | 52712355  | chicken | 222845  |
| 6 | 6q24    | 144336485 | 6q24    | 144810356 | chicken | 473871  |
| 6 | 6q25.3  | 159167979 | 6q25.3  | 160073718 | chicken | 905739  |
| 7 | 7p22    | 5573946   | 7p22    | 5982904   | chicken | 408958  |
| 7 | 7p22    | 6297062   | 7p21    | 7046962   | chicken | 749900  |
| 7 | 7p13    | 43453589  | 7p13    | 45387484  | chicken | 1933895 |
| 7 | 7p12    | 47252589  | 7p12    | 47907912  | chicken | 655323  |
| 7 | 7p11.2  | 54457923  | 7p11.2  | 54984120  | chicken | 526197  |
| 7 | 7q11.23 | 75788139  | 7q11.23 | 76791807  | chicken | 1003668 |

|    |         |           |         |           |         |         |
|----|---------|-----------|---------|-----------|---------|---------|
| 7  | 7q21.1  | 83000325  | 7q21.1  | 83206853  | chicken | 206528  |
| 7  | 7q21.1  | 86473042  | 7q21.1  | 86623012  | chicken | 149970  |
| 7  | 7q21.3  | 96391869  | 7q21.3  | 97242963  | chicken | 851094  |
| 7  | 7q21.3  | 97594284  | 7q22    | 98269689  | chicken | 675405  |
| 7  | 7q22    | 98701555  | 7q22    | 100551849 | chicken | 1850294 |
| 7  | 7q22    | 101802475 | 7q22    | 101802475 | chicken | 0       |
| 7  | 7q31.1  | 107357576 | 7q31.1  | 107381925 | chicken | 24349   |
| 7  | 7q32    | 126771269 | 7q32    | 128437335 | chicken | 1666066 |
| 7  | 7q32    | 129759213 | 7q32    | 130868489 | chicken | 1109276 |
| 7  | 7q33    | 132174783 | 7q33    | 132394899 | chicken | 220116  |
| 7  | 7q33    | 133525046 | 7q33    | 133803407 | chicken | 278361  |
| 7  | 7q33    | 134112641 | 7q33    | 134158751 | chicken | 46110   |
| 7  | 7q33    | 134790746 | 7q33    | 134816079 | chicken | 25333   |
| 7  | 7q34    | 140903503 | 7q34    | 141913675 | chicken | 1010172 |
| 7  | 7q34    | 142725902 | 7q35    | 143863863 | chicken | 1137961 |
| 7  | 7q36    | 148163633 | 7q36    | 150480038 | chicken | 2316405 |
| 8  | 8p23.1  | 6643537   | 8p23.1  | 9475005   | chicken | 2831468 |
| 8  | 8p23.1  | 9677262   | 8p23.1  | 10039998  | chicken | 362736  |
| 8  | 8p23.1  | 11748385  | 8p22    | 12907973  | chicken | 1159588 |
| 8  | 8p21    | 25961234  | 8p21    | 28013240  | chicken | 2052006 |
| 8  | 8p12    | 29104530  | 8p12    | 32286668  | chicken | 3182138 |
| 8  | 8q24.1  | 120187610 | 8q24.1  | 120621793 | chicken | 434183  |
| 9  | 9p24    | 8643415   | 9p23    | 12493211  | chicken | 3849796 |
| 9  | 9p23    | 12841201  | 9p13    | 15442998  | chicken | 2601797 |
| 9  | 9p21    | 21049498  | 9p21    | 23265977  | chicken | 2216479 |
| 9  | 9q22.3  | 91715989  | 9q22.3  | 92070817  | chicken | 354828  |
| 9  | 9q22.3  | 92494637  | 9q22.3  | 93070679  | chicken | 576042  |
| 9  | 9q22.3  | 98419936  | 9q22.3  | 98827383  | chicken | 407447  |
| 9  | 9q22.3  | 98995468  | 9q22.3  | 99018500  | chicken | 23032   |
| 9  | 9q31    | 100292759 | 9q31    | 101111333 | chicken | 818574  |
| 9  | 9q31    | 101539322 | 9q31    | 105036171 | chicken | 3496849 |
| 9  | 9q31    | 106891529 | 9q31    | 107976560 | chicken | 1085031 |
| 9  | 9q31    | 108258424 | 9q31    | 108875137 | chicken | 616713  |
| 9  | 9q31    | 109310005 | 9q31    | 109575581 | chicken | 265576  |
| 9  | 9q32    | 112732207 | 9q32    | 113098930 | chicken | 366723  |
| 9  | 9q32    | 113898629 | 9q32    | 113960102 | chicken | 61473   |
| 9  | 9q33    | 120464612 | 9q33    | 120640275 | chicken | 175663  |
| 9  | 9q33    | 127235485 | 9q34.1  | 127559023 | chicken | 323538  |
| 9  | 9q34.3  | 136897210 | 9q34.3  | 136926626 | chicken | 29416   |
| 10 | 10p15   | 4812889   | 10p15   | 5405648   | chicken | 592759  |
| 10 | 10p15   | 5971424   | 10p14   | 7602652   | chicken | 1631228 |
| 10 | 10p13   | 14323662  | 10p13   | 15592159  | chicken | 1268497 |
| 10 | 10q11.2 | 43021605  | 10q11.2 | 45189616  | chicken | 2168011 |
| 10 | 10q11.2 | 45479311  | 10q11.2 | 49056087  | chicken | 3576776 |
| 10 | 10q11.2 | 50449782  | 10q11.2 | 50489298  | chicken | 39516   |
| 10 | 10q11.2 | 50758433  | 10q21.1 | 53648790  | chicken | 2890357 |
| 10 | 10q21.1 | 54051981  | 10q21.1 | 55235946  | chicken | 1183965 |
| 10 | 10q21.1 | 56015683  | 10q21.1 | 59868172  | chicken | 3852489 |
| 10 | 10q21.1 | 60261224  | 10q21.2 | 61082266  | chicken | 821042  |
| 10 | 10q21.3 | 68715724  | 10q21.3 | 69348091  | chicken | 632367  |
| 10 | 10q22.1 | 74576201  | 10q22.2 | 74866374  | chicken | 290173  |
| 10 | 10q22.3 | 80875574  | 10q22.3 | 82254395  | chicken | 1378821 |
| 10 | 10q22.3 | 82396943  | 10q23.1 | 85891216  | chicken | 3494273 |
| 10 | 10q23.2 | 88940694  | 10q23.3 | 89255042  | chicken | 314348  |
| 10 | 10q23.3 | 89872817  | 10q23.3 | 90953099  | chicken | 1080282 |
| 10 | 10q23.3 | 96285673  | 10q23.3 | 96819149  | chicken | 533476  |
| 10 | 10q24.1 | 97286106  | 10q24.1 | 97794125  | chicken | 508019  |
| 10 | 10q24.1 | 98085815  | 10q24.1 | 98114363  | chicken | 28548   |

|    |          |           |          |           |         |         |
|----|----------|-----------|----------|-----------|---------|---------|
| 10 | 10q24.1  | 98459744  | 10q24.1  | 98654194  | chicken | 194450  |
| 10 | 10q24.2  | 101825872 | 10q24.3  | 102025130 | chicken | 199258  |
| 10 | 10q24.3  | 102632157 | 10q24.3  | 102665596 | chicken | 33439   |
| 10 | 10q24.3  | 103900153 | 10q24.3  | 103901997 | chicken | 1844    |
| 10 | 10q24.3  | 104174942 | 10q24.3  | 104218789 | chicken | 43847   |
| 10 | 10q26.1  | 125796126 | 10q26.2  | 129729097 | chicken | 3932971 |
| 11 | 11p15.5  | 480528    | 11p15.5  | 949416    | chicken | 468888  |
| 11 | 11p15.5  | 3108914   | 11p15.4  | 4345175   | chicken | 1236261 |
| 11 | 11p15.4  | 6619322   | 11p15.4  | 7280828   | chicken | 661506  |
| 11 | 11p15.4  | 7682866   | 11p15.4  | 8074792   | chicken | 391926  |
| 11 | 11p15.2  | 13723547  | 11p15.2  | 13853783  | chicken | 130236  |
| 11 | 11p15.2  | 14246001  | 11p15.2  | 14255922  | chicken | 9921    |
| 11 | 11p15.1  | 18722630  | 11p15.1  | 19690704  | chicken | 968074  |
| 11 | 11p13    | 33662373  | 11p13    | 34458185  | chicken | 795812  |
| 11 | 11p11.12 | 47568862  | 11p11.12 | 49124884  | chicken | 1556022 |
| 11 | 11q13.4  | 70536070  | 11q13.4  | 72225425  | chicken | 1689355 |
| 11 | 11q13.5  | 74955638  | 11q13.5  | 77317025  | chicken | 2361387 |
| 11 | 11q22.3  | 109984997 | 11q23    | 111205069 | chicken | 1220072 |
| 12 | 12p11.2  | 27072760  | 12p11.2  | 27760447  | chicken | 687687  |
| 12 | 12p11.2  | 29012215  | 12p11.2  | 29508691  | chicken | 496476  |
| 12 | 12q23    | 100302277 | 12q23    | 100371450 | chicken | 69173   |
| 12 | 12q23    | 106679140 | 12q23    | 106793205 | chicken | 114065  |
| 12 | 12q24.1  | 111444658 | 12q24.1  | 112091631 | chicken | 646973  |
| 12 | 12q24.31 | 119917101 | 12q24.31 | 121762436 | chicken | 1845335 |
| 13 | 13q31    | 79413807  | 13q31    | 79473307  | chicken | 59500   |
| 13 | 13q33    | 107431655 | 13q33    | 107913407 | chicken | 481752  |
| 14 | 14q32.3  | 104706611 | 14q32.3  | 104706611 | chicken | 0       |
| 15 | 15q11.2  | 20613794  | 15q12    | 23475285  | chicken | 2861491 |
| 15 | 15q13    | 26255370  | 15q13    | 27779573  | chicken | 1524203 |
| 15 | 15q13    | 29156503  | 15q13    | 30699461  | chicken | 1542958 |
| 15 | 15q15    | 38172249  | 15q15    | 38248753  | chicken | 76504   |
| 15 | 15q15    | 38858827  | 15q15    | 38924102  | chicken | 65275   |
| 15 | 15q15    | 41264077  | 15q15    | 41450296  | chicken | 186219  |
| 15 | 15q21.1  | 42740113  | 15q21.1  | 43119875  | chicken | 379762  |
| 15 | 15q21.1  | 43354999  | 15q21.1  | 43813810  | chicken | 458811  |
| 15 | 15q22.3  | 62063017  | 15q22.3  | 62191815  | chicken | 128798  |
| 15 | 15q22.3  | 62842540  | 15q22.3  | 63275573  | chicken | 433033  |
| 15 | 15q23    | 68779125  | 15q23    | 68911302  | chicken | 132177  |
| 15 | 15q23    | 69862655  | 15q23    | 69885929  | chicken | 23274   |
| 15 | 15q24    | 72881488  | 15q24    | 73933776  | chicken | 1052288 |
| 15 | 15q25    | 76714973  | 15q25    | 77891736  | chicken | 1176763 |
| 15 | 15q25    | 82586947  | 15q25    | 82586947  | chicken | 0       |
| 15 | 15q25    | 83289442  | 15q25    | 83877721  | chicken | 588279  |
| 15 | 15q25    | 88047379  | 15q26.1  | 89096018  | chicken | 1048639 |
| 15 | 15q26.1  | 89297551  | 15q26.1  | 89567887  | chicken | 270336  |
| 16 | 16p13.3  | 367902    | 16p13.3  | 388620    | chicken | 20718   |
| 16 | 16p13.3  | 713176    | 16p13.3  | 713176    | chicken | 0       |
| 16 | 16p13.3  | 1211786   | 16p13.3  | 1492344   | chicken | 280558  |
| 16 | 16p13.3  | 1690111   | 16p13.3  | 1797731   | chicken | 107620  |
| 16 | 16p13.3  | 2227488   | 16p13.3  | 3459326   | chicken | 1231838 |
| 16 | 16p13.3  | 4464150   | 16p13.3  | 4837821   | chicken | 373671  |
| 16 | 16p13.3  | 5087800   | 16p13.3  | 6126760   | chicken | 1038960 |
| 16 | 16p13.1  | 11256892  | 16p13.1  | 12479033  | chicken | 1222141 |
| 16 | 16p13.1  | 14691984  | 16p13.1  | 15582543  | chicken | 890559  |
| 16 | 16p12    | 18845522  | 16p12    | 21915152  | chicken | 3069630 |
| 16 | 16p12    | 27145727  | 16p11.2  | 29031647  | chicken | 1885920 |
| 16 | 16q21    | 57104792  | 16q21    | 57408214  | chicken | 303422  |
| 16 | 16q22    | 65534181  | 16q22    | 65624066  | chicken | 89885   |

|    |         |           |         |           |         |         |
|----|---------|-----------|---------|-----------|---------|---------|
| 16 | 16q22   | 66963693  | 16q22   | 68972224  | chicken | 2008531 |
| 16 | 16q22   | 69877357  | 16q22   | 72923956  | chicken | 3046599 |
| 16 | 16q23   | 73911511  | 16q23   | 75873885  | chicken | 1962374 |
| 17 | 17p13   | 2186447   | 17p13   | 2211664   | chicken | 25217   |
| 17 | 17p13   | 3582554   | 17p13   | 3712283   | chicken | 129729  |
| 17 | 17p13   | 4157201   | 17p13   | 5457386   | chicken | 1300185 |
| 17 | 17p13   | 6237594   | 17p13   | 8236729   | chicken | 1999135 |
| 17 | 17p12   | 15175628  | 17p12   | 15818939  | chicken | 643311  |
| 17 | 17p11.2 | 16277751  | 17p11.2 | 16277751  | chicken | 0       |
| 17 | 17p11.2 | 21267116  | 17q11.2 | 22645479  | chicken | 1378363 |
| 17 | 17q11.2 | 23695741  | 17q11.2 | 23699031  | chicken | 3290    |
| 17 | 17q21.3 | 44844292  | 17q21.3 | 47061154  | chicken | 2216862 |
| 17 | 17q23   | 52438820  | 17q23   | 52537644  | chicken | 98824   |
| 17 | 17q23   | 57679550  | 17q23   | 57837692  | chicken | 158142  |
| 17 | 17q23   | 59250410  | 17q23   | 59468673  | chicken | 218263  |
| 17 | 17q25   | 69567432  | 17q25   | 71113486  | chicken | 1546054 |
| 17 | 17q25   | 73615159  | 17q25   | 77485525  | chicken | 3870366 |
| 18 | 18p11.2 | 8396947   | 18p11.2 | 9982668   | chicken | 1585721 |
| 18 | 18p11.2 | 13880099  | 18q11.2 | 16783794  | chicken | 2903695 |
| 18 | 18q12.2 | 31002282  | 18q12.2 | 31302431  | chicken | 300149  |
| 18 | 18q12.2 | 32623593  | 18q12.2 | 33723305  | chicken | 1099712 |
| 18 | 18q21.1 | 43136264  | 18q21.1 | 43613642  | chicken | 477378  |
| 18 | 18q22   | 59805496  | 18q21.3 | 59865734  | chicken | 60238   |
| 18 | 18q23   | 72873406  | 18q23   | 73652540  | chicken | 779134  |
| 19 | 19p13.3 | 2259575   | 19p13.3 | 4602826   | chicken | 2343251 |
| 19 | 19p13.2 | 8669945   | 19p13.1 | 16039049  | chicken | 7369104 |
| 19 | 19p13.1 | 19477919  | 19p12   | 22486003  | chicken | 3008084 |
| 19 | 19q13.1 | 39684108  | 19q13.2 | 43635350  | chicken | 3951242 |
| 20 | 20p13   | 4178097   | 20p13   | 4712436   | chicken | 534339  |
| 20 | 20p12   | 5126548   | 20p12   | 5126548   | chicken | 0       |
| 20 | 20p12   | 13746140  | 20p12   | 14071964  | chicken | 325824  |
| 20 | 20p12   | 16679764  | 20p11.2 | 19964839  | chicken | 3285075 |
| 20 | 20p11.2 | 22497809  | 20p11.2 | 24752142  | chicken | 2254333 |
| 20 | 20q11.2 | 30901944  | 20q11.2 | 31597325  | chicken | 695381  |
| 20 | 20q11.2 | 34605332  | 20q11.2 | 35689167  | chicken | 1083835 |
| 20 | 20q11.2 | 36223597  | 20q11.2 | 36685358  | chicken | 461761  |
| 20 | 20q13.1 | 47532990  | 20q13.1 | 47682841  | chicken | 149851  |
| 21 | 21q22.3 | 44000557  | 21q22.3 | 46137542  | chicken | 2136985 |
| 22 | 22q11.2 | 16988468  | 22q11.2 | 17692784  | chicken | 704316  |
| 22 | 22q11.2 | 20654768  | 22q11.2 | 21761952  | chicken | 1107184 |
| 22 | 22q12.1 | 27778011  | 22q12.2 | 27992589  | chicken | 214578  |
| 22 | 22q12.3 | 30830867  | 22q12.3 | 31108492  | chicken | 277625  |
| 22 | 22q13.2 | 41335900  | 22q13.2 | 41340275  | chicken | 4375    |
| 22 | 22q13.3 | 44687806  | 22q13.3 | 45508901  | chicken | 821095  |
| 22 | 22q13.3 | 47541745  | 22q13.3 | 47764631  | chicken | 222886  |
| X  | Xp11.3  | 45492563  | Xp11.3  | 46222311  | chicken | 729748  |
| X  | Xq13.1  | 70577663  | Xq13.2  | 73523822  | chicken | 2946159 |
| X  | Xq21.1  | 77188027  | Xq21.1  | 77809249  | chicken | 621222  |
| X  | Xq21.1  | 78851521  | Xq21.1  | 80138376  | chicken | 1286855 |
| X  | Xq22.1  | 99990589  | Xq22.2  | 103217204 | chicken | 3226615 |
| X  | Xq22.3  | 105923657 | Xq23    | 109052728 | chicken | 3129071 |
| X  | Xq25    | 128378662 | Xq26.2  | 130914166 | chicken | 2535504 |
| X  | Xq26.3  | 137667500 | Xq27.1  | 138890958 | chicken | 1223458 |
| 1  | 1p36.22 | 10382321  | 1p36.22 | 10393599  | dog     | 11278   |
| 1  | 1p35.1  | 33641688  | 1p35.1  | 33648344  | dog     | 6656    |
| 1  | 1p34.2  | 43218471  | 1p34.2  | 43278840  | dog     | 60369   |
| 1  | 1p32.3  | 53002763  | 1p32.3  | 53003633  | dog     | 870     |
| 1  | 1p31.2  | 67643657  | 1p31.2  | 67643658  | dog     | 1       |



|   |         |           |         |           |     |         |
|---|---------|-----------|---------|-----------|-----|---------|
| 1 | 1p13.2  | 111718814 | 1p13.2  | 111722713 | dog | 3899    |
| 1 | 1p13.2  | 113947730 | 1p13.2  | 113948585 | dog | 855     |
| 1 | 1q21.3  | 150079679 | 1q21.3  | 150138138 | dog | 58459   |
| 1 | 1q32.1  | 199920606 | 1q32.1  | 199932654 | dog | 12048   |
| 1 | 1q32.1  | 203176244 | 1q32.1  | 203194672 | dog | 18428   |
| 1 | 1q44    | 243460072 | 1q44    | 243774014 | dog | 313942  |
| 1 | 1q44    | 244065183 | 1q44    | 244328000 | dog | 262817  |
| 1 | 1q44    | 245065271 | 1q44    | 245306495 | dog | 241224  |
| 2 | 2p21    | 42896353  | 2p21    | 42899011  | dog | 2658    |
| 2 | 2p13.3  | 71199984  | 2p13.3  | 71199985  | dog | 1       |
| 2 | 2q11.2  | 96656378  | 2q11.2  | 96679345  | dog | 22967   |
| 2 | 2q13    | 109821753 | 2q13    | 110177993 | dog | 356240  |
| 2 | 2q13    | 113855973 | 2q13    | 113884132 | dog | 28159   |
| 2 | 2q14.1  | 114038202 | 2q14.1  | 114145966 | dog | 107764  |
| 2 | 2q21.1  | 130390523 | 2q21.1  | 131311558 | dog | 921035  |
| 2 | 2q21.1  | 131747793 | 2q21.2  | 132438713 | dog | 690920  |
| 2 | 2q21.2  | 132599047 | 2q21.2  | 132972107 | dog | 373060  |
| 2 | 2q23.3  | 153457546 | 2q23.3  | 153661565 | dog | 204019  |
| 2 | 2q32.2  | 190041649 | 2q32.2  | 190131662 | dog | 90013   |
| 2 | 2q36.2  | 225096837 | 2q36.2  | 225097358 | dog | 521     |
| 3 | 3p25.2  | 12872767  | 3p25.2  | 12909573  | dog | 36806   |
| 3 | 3p25.1  | 15138279  | 3p25.1  | 15162939  | dog | 24660   |
| 3 | 3p23    | 32673929  | 3p23    | 32675344  | dog | 1415    |
| 3 | 3p21.3  | 44600317  | 3p21.3  | 44719392  | dog | 119075  |
| 3 | 3p12.3  | 75411831  | 3p12.3  | 75411831  | dog | 0       |
| 3 | 3p12.3  | 75722985  | 3p12.3  | 75944922  | dog | 221937  |
| 3 | 3q25.32 | 159979299 | 3q25.32 | 159979311 | dog | 12      |
| 3 | 3q26.32 | 180198708 | 3q26.32 | 180214406 | dog | 15698   |
| 3 | 3q29    | 194780147 | 3q29    | 194780327 | dog | 180     |
| 3 | 3q29    | 195495418 | 3q29    | 195538929 | dog | 43511   |
| 4 | 4p16.3  | 1231195   | 4p16.3  | 1272687   | dog | 41492   |
| 4 | 4p16.3  | 3919912   | 4p16.3  | 4055037   | dog | 135125  |
| 4 | 4p16.3  | 4238573   | 4p16.3  | 4302249   | dog | 63676   |
| 4 | 4p16.1  | 6333095   | 4p16.1  | 6439809   | dog | 106714  |
| 4 | 4p16.1  | 8850821   | 4p16.1  | 9199334   | dog | 348513  |
| 4 | 4p16.1  | 9388939   | 4p16.1  | 9441011   | dog | 52072   |
| 4 | 4p15.3  | 17436502  | 4p15.3  | 17436503  | dog | 1       |
| 4 | 4p13    | 41164479  | 4p13    | 41166419  | dog | 1940    |
| 4 | 4p12    | 48924940  | 4q12    | 52529825  | dog | 3604885 |
| 4 | 4q13.3  | 75714013  | 4q13.3  | 75983576  | dog | 269563  |
| 4 | 4q21.1  | 76653750  | 4q21.1  | 76751895  | dog | 98145   |
| 4 | 4q27    | 121350309 | 4q27    | 121350633 | dog | 324     |
| 4 | 4q31.21 | 144761733 | 4q31.21 | 144786115 | dog | 24382   |
| 4 | 4q32.3  | 169618366 | 4q32.3  | 169723663 | dog | 105297  |
| 4 | 4q34.2  | 176804918 | 4q34.2  | 176816947 | dog | 12029   |
| 5 | 5p15.2  | 14749628  | 5p15.2  | 14949323  | dog | 199695  |
| 5 | 5p12    | 45939847  | 5q11.2  | 49605557  | dog | 3665710 |
| 5 | 5q35.3  | 176931766 | 5q35.3  | 177423016 | dog | 491250  |
| 6 | 6p22.1  | 29757150  | 6p21.33 | 30129521  | dog | 372371  |
| 6 | 6p21.33 | 30289669  | 6p21.33 | 30399903  | dog | 110234  |
| 6 | 6p11.2  | 58195618  | 6q12    | 62025056  | dog | 3829438 |
| 6 | 6q22.3  | 116717761 | 6q22.3  | 116718611 | dog | 850     |
| 6 | 6q23.2  | 131729655 | 6q23.2  | 131895759 | dog | 166104  |
| 6 | 6q23.2  | 132113394 | 6q23.2  | 132113395 | dog | 1       |
| 6 | 6q23.2  | 132280804 | 6q23.2  | 132285635 | dog | 4831    |
| 6 | 6q27    | 169912904 | 6q27    | 169920119 | dog | 7215    |
| 7 | 7p22    | 6520044   | 7p22    | 6813098   | dog | 293054  |
| 7 | 7q31.32 | 122749795 | 7q31.32 | 122770216 | dog | 20421   |

|    |          |           |          |           |     |         |
|----|----------|-----------|----------|-----------|-----|---------|
| 7  | 7q33     | 133750212 | 7q33     | 133757747 | dog | 7535    |
| 7  | 7q34     | 137385080 | 7q34     | 137568329 | dog | 183249  |
| 7  | 7q36.1   | 148170205 | 7q36.1   | 148198081 | dog | 27876   |
| 8  | 8p23.3   | 458855    | 8p23.3   | 472774    | dog | 13919   |
| 8  | 8p23.3   | 1736205   | 8p23.3   | 2104208   | dog | 368003  |
| 8  | 8p23.1   | 7404055   | 8p23.1   | 8140777   | dog | 736722  |
| 8  | 8q11.2   | 48819182  | 8q11.2   | 48847055  | dog | 27873   |
| 8  | 8q22.1   | 98817981  | 8q22.1   | 98831935  | dog | 13954   |
| 9  | 9p24     | 5843772   | 9p24     | 5877708   | dog | 33936   |
| 9  | 9q33.2   | 121295766 | 9q33.2   | 121295768 | dog | 2       |
| 10 | 10p12.1  | 27658010  | 10p11.23 | 29776485  | dog | 2118475 |
| 10 | 10p11.21 | 37137798  | 10p11.21 | 37229772  | dog | 91974   |
| 10 | 10p11.21 | 37442197  | 10p11.21 | 37454831  | dog | 12634   |
| 10 | 10p11.21 | 37575497  | 10p11.21 | 38150113  | dog | 574616  |
| 10 | 10p11.21 | 38450766  | 10p11.21 | 38560470  | dog | 109704  |
| 10 | 10p11.21 | 38677520  | 10q11.21 | 42583565  | dog | 3906045 |
| 10 | 10q11.22 | 46102264  | 10q11.22 | 46283519  | dog | 181255  |
| 10 | 10q11.22 | 46594244  | 10q11.22 | 47937830  | dog | 1343586 |
| 10 | 10q11.22 | 48232895  | 10q11.22 | 48339957  | dog | 107062  |
| 11 | 11p15.5  | 783824    | 11p15.5  | 787154    | dog | 3330    |
| 11 | 11p15.4  | 3226658   | 11p15.4  | 3379328   | dog | 152670  |
| 11 | 11p15.4  | 3569927   | 11p15.4  | 3582092   | dog | 12165   |
| 11 | 11p14    | 30237414  | 11p14    | 30247659  | dog | 10245   |
| 11 | 11p11.2  | 44035700  | 11p11.2  | 44036412  | dog | 712     |
| 11 | 11q12.1  | 59275943  | 11q12.1  | 59291321  | dog | 15378   |
| 11 | 11q12.2  | 60003192  | 11q12.2  | 60036669  | dog | 33477   |
| 11 | 11q13.4  | 70893857  | 11q13.4  | 71017252  | dog | 123395  |
| 11 | 11q13.4  | 71193468  | 11q13.4  | 71304291  | dog | 110823  |
| 11 | 11q22.1  | 100814003 | 11q22.1  | 100827814 | dog | 13811   |
| 12 | 12p13.3  | 2723684   | 12p13.3  | 2730380   | dog | 6696    |
| 12 | 12q13.2  | 54012775  | 12q13.2  | 54287763  | dog | 274988  |
| 12 | 12q21.1  | 74177243  | 12q21.1  | 74177244  | dog | 1       |
| 12 | 12q23.3  | 103086679 | 12q23.3  | 103102923 | dog | 16244   |
| 12 | 12q23.3  | 106684856 | 12q23.3  | 106814087 | dog | 129231  |
| 12 | 12q24.11 | 108949566 | 12q24.11 | 108951491 | dog | 1925    |
| 13 | 13q14.11 | 40332943  | 13q14.11 | 40365243  | dog | 32300   |
| 13 | 13q14.3  | 51584594  | 13q14.3  | 51669217  | dog | 84623   |
| 13 | 13q14.3  | 52111818  | 13q14.3  | 52113304  | dog | 1486    |
| 14 | 14q11.2  | 21253497  | 14q11.2  | 21395918  | dog | 142421  |
| 15 | 15q11.2  | 19915888  | 15q11.2  | 20384797  | dog | 468909  |
| 15 | 15q11.2  | 20945083  | 15q11.2  | 21345654  | dog | 400571  |
| 15 | 15q13.1  | 26256384  | 15q11.2  | 26618210  | dog | 361826  |
| 15 | 15q13.1  | 26726450  | 15q13.1  | 26996749  | dog | 270299  |
| 15 | 15q13.3  | 30410087  | 15q13.1  | 30689725  | dog | 279638  |
| 15 | 15q24.2  | 73815789  | 15q13.3  | 73913340  | dog | 97551   |
| 15 | 15q24.3  | 75985591  | 15q24.2  | 76049817  | dog | 64226   |
| 15 | 15q25.1  | 76479556  | 15q24.3  | 76513591  | dog | 34035   |
| 15 | 15q25.1  | 76788398  | 15q25.1  | 76830782  | dog | 42384   |
| 15 | 15q26.1  | 89369223  | 15q26.1  | 89393005  | dog | 23782   |
| 15 | 15q26.3  | 100084049 | 15q26.1  | 100158792 | dog | 74743   |
| 16 | 16p11.2  | 28521388  | 16p11.2  | 28621408  | dog | 100020  |
| 16 | 16p11.2  | 28953950  | 16p11.2  | 29026963  | dog | 73013   |
| 16 | 16p11.2  | 29252547  | 16p11.2  | 29561340  | dog | 308793  |
| 16 | 16q12.1  | 45539453  | 16q12.1  | 45544006  | dog | 4553    |
| 16 | 16q21    | 57366106  | 16q21    | 57406651  | dog | 40545   |
| 17 | 17p13.3  | 1184941   | 17p13.3  | 1191122   | dog | 6181    |
| 17 | 17p13.2  | 3767755   | 17p13.2  | 3853747   | dog | 85992   |
| 17 | 17p11.2  | 21281418  | 17q11.2  | 22549716  | dog | 1268298 |

|    |          |           |          |           |       |         |
|----|----------|-----------|----------|-----------|-------|---------|
| 17 | 17q12    | 31512484  | 17q12    | 33605007  | dog   | 2092523 |
| 17 | 17q24.1  | 60190842  | 17q24.2  | 63727001  | dog   | 3536159 |
| 17 | 17q24.3  | 65862760  | 17q24.3  | 65885993  | dog   | 23233   |
| 18 | 18p11.21 | 13122946  | 18p11.21 | 13153897  | dog   | 30951   |
| 18 | 18p11.21 | 14020900  | 18p11.21 | 15007216  | dog   | 986316  |
| 18 | 18p11.21 | 15152965  | 18q11.2  | 16774339  | dog   | 1621374 |
| 18 | 18q21.1  | 43823147  | 18q21.1  | 43823148  | dog   | 1       |
| 18 | 18q21.1  | 46143061  | 18q21.1  | 46560528  | dog   | 417467  |
| 20 | 20p11.2  | 23470914  | 20p11.2  | 23878991  | dog   | 408077  |
| 20 | 20p11.2  | 25553589  | 20q11.2  | 29297001  | dog   | 3743412 |
| 21 | 21q11.2  | 13636377  | 21q11.2  | 14400619  | dog   | 764242  |
| 22 | 22q11.21 | 17035708  | 22q11.21 | 17384761  | dog   | 349053  |
| 22 | 22q11.21 | 18719485  | 22q11.21 | 22255853  | dog   | 3536368 |
| 22 | 22q11.21 | 23363676  | 22q11.21 | 23544486  | dog   | 180810  |
| 22 | 22q12.3  | 30977686  | 22q12.3  | 31107873  | dog   | 130187  |
| X  | Xq11.2   | 63440737  | Xq11.2   | 63916710  | dog   | 475973  |
| X  | Xq21.3   | 86731882  | Xq21.3   | 90311848  | dog   | 3579966 |
| 7  | 7q11.23  | 72881325  | 7q11.23  | 76765093  | horse | 3883768 |
| 8  | 8p21     | 23361090  | 8p21     | 27276054  | horse | 3914964 |
| 11 | 11p15.5  | 2119251   | 11p15.4  | 5205763   | horse | 3086512 |
| 13 | 13q14.1  | 39302438  | 13q14.1  | 40572332  | horse | 1269894 |
| 17 | 17q24    | 62391090  | 17q24    | 62913279  | horse | 522189  |
| 22 | 22q12.2  | 30000274  | 22q12.3  | 31579882  | horse | 1579608 |
| X  | Xq23     | 113607456 | Xq23     | 115007213 | horse | 1399757 |
| X  | Xq24     | 117578597 | Xq24     | 120270358 | horse | 2691761 |
| 1  | 1p32     | 58369551  | 1p32     | 58478059  | mouse | 108508  |
| 1  | 1p31.2   | 66969862  | 1p31.2   | 67947982  | mouse | 978120  |
| 1  | 1p22     | 89101147  | 1p22     | 89101347  | mouse | 200     |
| 1  | 1p22     | 93175140  | 1p22     | 93262870  | mouse | 87730   |
| 1  | 1q23     | 154874654 | 1q23     | 155300088 | mouse | 425434  |
| 1  | 1q32     | 204164021 | 1q32     | 204219578 | mouse | 55557   |
| 1  | 1q42     | 220829162 | 1q42     | 220829362 | mouse | 200     |
| 1  | 1q42     | 222368518 | 1q42     | 222417706 | mouse | 49188   |
| 1  | 1q42     | 224030267 | 1q42     | 225235652 | mouse | 1205385 |
| 1  | 1q42     | 231615019 | 1q42     | 231635058 | mouse | 20039   |
| 1  | 1q43     | 236366875 | 1q43     | 236517890 | mouse | 151015  |
| 2  | 2p25.3   | 1581123   | 2p25.3   | 1725442   | mouse | 144319  |
| 2  | 2p25.3   | 3119186   | 2p25.3   | 3235032   | mouse | 115846  |
| 2  | 2p23     | 26308539  | 2p23     | 26353794  | mouse | 45255   |
| 2  | 2p23     | 28962129  | 2p23     | 28993931  | mouse | 31802   |
| 2  | 2p16     | 53300424  | 2p16     | 53845778  | mouse | 545354  |
| 2  | 2p13     | 68650089  | 2p13     | 68652539  | mouse | 2450    |
| 2  | 2p13     | 70975429  | 2p13     | 70990164  | mouse | 14735   |
| 2  | 2p13     | 74026347  | 2p13     | 74026547  | mouse | 200     |
| 2  | 2q12     | 106560466 | 2q12     | 106988785 | mouse | 428319  |
| 2  | 2q12     | 108672097 | 2q13     | 110419967 | mouse | 1747870 |
| 2  | 2q13     | 113554679 | 2q14.1   | 114345182 | mouse | 790503  |
| 2  | 2q14.3   | 122483460 | 2q14.3   | 123877004 | mouse | 1393544 |
| 2  | 2q14.3   | 124910919 | 2q14.3   | 127121695 | mouse | 2210776 |
| 2  | 2q14.3   | 128690762 | 2q14.3   | 128726070 | mouse | 35308   |
| 2  | 2q21.1   | 131913009 | 2q21.2   | 133161124 | mouse | 1248115 |
| 2  | 2q22     | 138624340 | 2q22     | 139955335 | mouse | 1330995 |
| 2  | 2q32.1   | 188356222 | 2q32.1   | 188546182 | mouse | 189960  |
| 2  | 2q32.2   | 190478738 | 2q32.2   | 190478938 | mouse | 200     |
| 2  | 2q32.3   | 196737493 | 2q32.3   | 196737963 | mouse | 470     |
| 3  | 3p25     | 12864927  | 3p25     | 12935539  | mouse | 70612   |
| 3  | 3p25     | 15135116  | 3p25     | 16302013  | mouse | 1166897 |
| 3  | 3p24     | 20077784  | 3p24     | 22997012  | mouse | 2919228 |

|   |        |           |        |           |       |         |
|---|--------|-----------|--------|-----------|-------|---------|
| 3 | 3p24   | 27550695  | 3p24   | 27605472  | mouse | 54777   |
| 3 | 3p22   | 37067985  | 3p22   | 37082953  | mouse | 14968   |
| 3 | 3p14.3 | 57784230  | 3p14.3 | 57800515  | mouse | 16285   |
| 3 | 3p14.1 | 63864162  | 3p14.1 | 63872693  | mouse | 8531    |
| 3 | 3p12   | 75092934  | 3p12   | 75733563  | mouse | 640629  |
| 3 | 3q21   | 126621496 | 3q21   | 127015941 | mouse | 394445  |
| 3 | 3q21   | 130317226 | 3q21   | 131213263 | mouse | 896037  |
| 3 | 3q24   | 149369030 | 3q24   | 150355637 | mouse | 986607  |
| 3 | 3q26.1 | 169224070 | 3q26.2 | 169298816 | mouse | 74746   |
| 3 | 3q26.2 | 171956943 | 3q26.2 | 171957143 | mouse | 200     |
| 3 | 3q26.3 | 179505847 | 3q26.3 | 179510053 | mouse | 4206    |
| 3 | 3q27   | 184220160 | 3q26.3 | 184243568 | mouse | 23408   |
| 3 | 3q29   | 196687900 | 3q29   | 196836896 | mouse | 148996  |
| 4 | 4p16   | 3792758   | 4p16   | 4198357   | mouse | 405599  |
| 4 | 4p16   | 8859586   | 4p16   | 9474941   | mouse | 615355  |
| 4 | 4q22   | 89368712  | 4q22   | 89368912  | mouse | 200     |
| 4 | 4q22   | 95665419  | 4q22   | 95686485  | mouse | 21066   |
| 4 | 4q26   | 121086919 | 4q27   | 121332329 | mouse | 245410  |
| 4 | 4q27   | 122734117 | 4q27   | 122734317 | mouse | 200     |
| 4 | 4q31.1 | 141656124 | 4q31.1 | 141721737 | mouse | 65613   |
| 4 | 4q31.2 | 151341774 | 4q31.2 | 151432696 | mouse | 90922   |
| 4 | 4q32   | 163691876 | 4q32   | 163971547 | mouse | 279671  |
| 5 | 5p15.3 | 8302649   | 5p15.3 | 8302849   | mouse | 200     |
| 5 | 5p12   | 42875358  | 5p12   | 43487040  | mouse | 611682  |
| 5 | 5q15   | 96161775  | 5q15   | 96233455  | mouse | 71680   |
| 5 | 5q21   | 98428174  | 5q21   | 98428374  | mouse | 200     |
| 5 | 5q21   | 101907132 | 5q21   | 102790626 | mouse | 883494  |
| 5 | 5q22   | 110093254 | 5q22   | 110329574 | mouse | 236320  |
| 5 | 5q22   | 112320424 | 5q22   | 112320624 | mouse | 200     |
| 5 | 5q23.3 | 130393506 | 5q23.3 | 130515065 | mouse | 121559  |
| 5 | 5q31.1 | 134084748 | 5q31.1 | 134105170 | mouse | 20422   |
| 5 | 5q31.1 | 137121370 | 5q31.1 | 137256961 | mouse | 135591  |
| 5 | 5q32   | 147606363 | 5q32   | 147631312 | mouse | 24949   |
| 5 | 5q33.1 | 150267493 | 5q33.1 | 150368888 | mouse | 101395  |
| 5 | 5q33.2 | 154303864 | 5q33.2 | 154310069 | mouse | 6205    |
| 5 | 5q35   | 171867674 | 5q35   | 173698426 | mouse | 1830752 |
| 5 | 5q35   | 177106680 | 5q35   | 177483917 | mouse | 377237  |
| 6 | 6p22.3 | 20123166  | 6p22.3 | 20128162  | mouse | 4996    |
| 6 | 6p22.1 | 29077605  | 6p22.1 | 29140908  | mouse | 63303   |
| 6 | 6p21.3 | 33298631  | 6p21.3 | 33360955  | mouse | 62324   |
| 6 | 6p21.2 | 39059211  | 6p21.2 | 39280062  | mouse | 220851  |
| 6 | 6p12   | 49700593  | 6p12   | 49804425  | mouse | 103832  |
| 6 | 6p12   | 52714965  | 6p12   | 52725247  | mouse | 10282   |
| 6 | 6p12   | 55784269  | 6p12   | 56225900  | mouse | 441631  |
| 6 | 6q13   | 73858776  | 6q13   | 74013182  | mouse | 154406  |
| 6 | 6q14   | 86338899  | 6q14   | 87745373  | mouse | 1406474 |
| 6 | 6q16.3 | 100244557 | 6q16.3 | 100535267 | mouse | 290710  |
| 6 | 6q22.1 | 116988488 | 6q22.1 | 117049038 | mouse | 60550   |
| 6 | 6q22.3 | 123084295 | 6q22.3 | 123135007 | mouse | 50712   |
| 6 | 6q25.1 | 150140235 | 6q25.1 | 150201242 | mouse | 61007   |
| 6 | 6q25.2 | 154942085 | 6q25.2 | 155009552 | mouse | 67467   |
| 6 | 6q25.3 | 158794650 | 6q25.3 | 159937583 | mouse | 1142933 |
| 6 | 6q27   | 167369970 | 6q27   | 167761130 | mouse | 391160  |
| 7 | 7p21   | 12241969  | 7p21   | 12272471  | mouse | 30502   |
| 7 | 7p21   | 19456148  | 7p21   | 19463757  | mouse | 7609    |
| 7 | 7p15.3 | 22236982  | 7p15.3 | 22963958  | mouse | 726976  |
| 7 | 7p14   | 32800883  | 7p14   | 32878146  | mouse | 77263   |
| 7 | 7p14   | 36045970  | 7p14   | 36231162  | mouse | 185192  |

|    |         |           |         |           |       |         |
|----|---------|-----------|---------|-----------|-------|---------|
| 7  | 7p13    | 43312709  | 7p13    | 43621438  | mouse | 308729  |
| 7  | 7q11.23 | 71582029  | 7q11.23 | 72128832  | mouse | 546803  |
| 7  | 7q11.23 | 73887786  | 7q11.23 | 76308307  | mouse | 2420521 |
| 7  | 7q21.1  | 84871677  | 7q21.1  | 84932535  | mouse | 60858   |
| 7  | 7q21.3  | 92243945  | 7q21.2  | 92334045  | mouse | 90100   |
| 7  | 7q21.3  | 97098638  | 7q21.3  | 97204900  | mouse | 106262  |
| 7  | 7q22    | 98816819  | 7q22    | 99123663  | mouse | 306844  |
| 7  | 7q22    | 101660815 | 7q22    | 101878946 | mouse | 218131  |
| 7  | 7q22    | 104742436 | 7q22    | 104754839 | mouse | 12403   |
| 7  | 7q31.1  | 107320074 | 7q31.1  | 107323301 | mouse | 3227    |
| 7  | 7q31.1  | 111682409 | 7q31.1  | 111686189 | mouse | 3780    |
| 7  | 7q36    | 149864544 | 7q36    | 149903378 | mouse | 38834   |
| 7  | 7q36    | 156511361 | 7q36    | 156531925 | mouse | 20564   |
| 8  | 8p23.1  | 7056332   | 8p23.1  | 7981988   | mouse | 925656  |
| 8  | 8p23.1  | 9510886   | 8p23.1  | 9579292   | mouse | 68406   |
| 8  | 8p23.1  | 11711299  | 8p23.1  | 12354260  | mouse | 642961  |
| 8  | 8p22    | 17763961  | 8p22    | 17802310  | mouse | 38349   |
| 8  | 8p21    | 19985868  | 8p21    | 20008284  | mouse | 22416   |
| 8  | 8p12    | 28970491  | 8p12    | 29011077  | mouse | 40586   |
| 8  | 8p12    | 36514720  | 8p12    | 36514920  | mouse | 200     |
| 8  | 8p12    | 37697674  | 8p12    | 37703986  | mouse | 6312    |
| 8  | 8q11.2  | 49588255  | 8q11.2  | 50397319  | mouse | 809064  |
| 8  | 8q12    | 56285211  | 8q12    | 56386621  | mouse | 101410  |
| 8  | 8q12    | 62430547  | 8q12    | 62430747  | mouse | 200     |
| 8  | 8q12    | 63737128  | 8q12    | 63799252  | mouse | 62124   |
| 8  | 8q13    | 67059557  | 8q13    | 67074574  | mouse | 15017   |
| 8  | 8q21.1  | 75849464  | 8q21.1  | 75921688  | mouse | 72224   |
| 8  | 8q21.2  | 86722830  | 8q21.2  | 86725182  | mouse | 2352    |
| 8  | 8q22.1  | 96908031  | 8q22.1  | 97082832  | mouse | 174801  |
| 9  | 9p24    | 6655150   | 9p24    | 6733134   | mouse | 77984   |
| 9  | 9p21    | 27287159  | 9p21    | 27315182  | mouse | 28023   |
| 9  | 9q21.2  | 76348435  | 9q21.2  | 76566130  | mouse | 217695  |
| 9  | 9q21.3  | 79707435  | 9q21.3  | 79787665  | mouse | 80230   |
| 9  | 9q21.3  | 83878430  | 9q21.3  | 84333496  | mouse | 455066  |
| 9  | 9q22.1  | 88142795  | 9q22.1  | 88326888  | mouse | 184093  |
| 9  | 9q22.2  | 90365482  | 9q22.2  | 90655572  | mouse | 290090  |
| 9  | 9q22.3  | 93266234  | 9q22.3  | 93496288  | mouse | 230054  |
| 9  | 9q33    | 116942209 | 9q33    | 116993785 | mouse | 51576   |
| 9  | 9q33    | 121409752 | 9q33    | 121409952 | mouse | 200     |
| 9  | 9q33    | 124499927 | 9q33    | 124500127 | mouse | 200     |
| 9  | 9q34.1  | 127752163 | 9q34.1  | 127775856 | mouse | 23693   |
| 9  | 9q34.1  | 129390603 | 9q34.1  | 129486460 | mouse | 95857   |
| 9  | 9q34.1  | 131919071 | 9q34.1  | 131941434 | mouse | 22363   |
| 10 | 10p15   | 6009060   | 10p15   | 6065821   | mouse | 56761   |
| 10 | 10p13   | 15603605  | 10p13   | 15625119  | mouse | 21514   |
| 10 | 10p12.1 | 27681482  | 10p12.1 | 27701190  | mouse | 19708   |
| 10 | 10p12.1 | 29062204  | 10p12.1 | 29101116  | mouse | 38912   |
| 10 | 10p11.2 | 33217351  | 10p11.2 | 33217551  | mouse | 200     |
| 10 | 10p11.2 | 35326646  | 10p11.2 | 35775767  | mouse | 449121  |
| 10 | 10q11.2 | 45932301  | 10q11.2 | 46803496  | mouse | 871195  |
| 10 | 10q11.2 | 51487686  | 10q11.2 | 51895116  | mouse | 407430  |
| 10 | 10q21.1 | 54461632  | 10q21.1 | 55050903  | mouse | 589271  |
| 10 | 10q22.2 | 74749467  | 10q22.2 | 74762588  | mouse | 13121   |
| 10 | 10q22.3 | 81955250  | 10q22.3 | 81955450  | mouse | 200     |
| 10 | 10q23.2 | 89096592  | 10q23.3 | 89391382  | mouse | 294790  |
| 10 | 10q26.1 | 121315237 | 10q26.1 | 121315437 | mouse | 200     |
| 11 | 11p15.5 | 3213050   | 11p15.4 | 3590341   | mouse | 377291  |
| 11 | 11p15.1 | 17495811  | 11p15.1 | 17496011  | mouse | 200     |

|    |          |           |          |           |       |         |
|----|----------|-----------|----------|-----------|-------|---------|
| 11 | 11p14    | 25978536  | 11p14    | 26249523  | mouse | 270987  |
| 11 | 11q12    | 58001448  | 11q12    | 58444956  | mouse | 443508  |
| 11 | 11q13.3  | 63137398  | 11q13.1  | 64448975  | mouse | 1311577 |
| 11 | 11q13.3  | 68957204  | 11q13.3  | 69019897  | mouse | 62693   |
| 11 | 11q13.4  | 71432282  | 11q13.4  | 71849811  | mouse | 417529  |
| 11 | 11q14.3  | 89511911  | 11q14.3  | 90047433  | mouse | 535522  |
| 11 | 11q22.3  | 107468989 | 11q22.3  | 107486943 | mouse | 17954   |
| 12 | 12p13.3  | 2682266   | 12p13.3  | 2784404   | mouse | 102138  |
| 12 | 12p13.3  | 9184429   | 12p13.3  | 9281368   | mouse | 96939   |
| 12 | 12q13.2  | 54789653  | 12q13.3  | 55073321  | mouse | 283668  |
| 12 | 12q23    | 104257973 | 12q23    | 104292389 | mouse | 34416   |
| 12 | 12q24.1  | 108109684 | 12q24.1  | 108258437 | mouse | 148753  |
| 12 | 12q24.1  | 110367340 | 12q24.1  | 110388095 | mouse | 20755   |
| 12 | 12q24.31 | 121280245 | 12q24.31 | 121340361 | mouse | 60116   |
| 13 | 13q12.1  | 22293650  | 13q12.1  | 25715171  | mouse | 3421521 |
| 13 | 13q13    | 33271776  | 13q13    | 33424754  | mouse | 152978  |
| 13 | 13q14.1  | 40183356  | 13q14.1  | 40442833  | mouse | 259477  |
| 13 | 13q14.2  | 48735681  | 13q14.2  | 49140862  | mouse | 405181  |
| 13 | 13q14.3  | 51291453  | 13q14.3  | 51683386  | mouse | 391933  |
| 13 | 13q33    | 101982034 | 13q33    | 102373168 | mouse | 391134  |
| 14 | 14q11.2  | 23133159  | 14q11.2  | 23148394  | mouse | 15235   |
| 14 | 14q22    | 50233231  | 14q21    | 50679010  | mouse | 445779  |
| 14 | 14q22    | 56613453  | 14q22    | 56656961  | mouse | 43508   |
| 15 | 15q13    | 25992349  | 15q13    | 26827749  | mouse | 835400  |
| 15 | 15q13    | 27946389  | 15q13    | 28776847  | mouse | 830458  |
| 15 | 15q13    | 30021254  | 15q13    | 30513217  | mouse | 491963  |
| 15 | 15q24    | 73595971  | 15q24    | 73678129  | mouse | 82158   |
| 15 | 15q24    | 75746357  | 15q24    | 75868786  | mouse | 122429  |
| 15 | 15q25    | 77705431  | 15q25    | 77846292  | mouse | 140861  |
| 15 | 15q25    | 80141631  | 15q25    | 80799598  | mouse | 657967  |
| 15 | 15q25    | 82356077  | 15q25    | 83446324  | mouse | 1090247 |
| 15 | 15q25    | 89148393  | 15q26.1  | 89191697  | mouse | 43304   |
| 16 | 16p13.3  | 3238113   | 16p13.3  | 3284805   | mouse | 46692   |
| 16 | 16p12    | 16153065  | 16p13.1  | 16658070  | mouse | 505005  |
| 16 | 16p12    | 18128289  | 16p12    | 18652265  | mouse | 523976  |
| 16 | 16q22    | 69711086  | 16q22    | 69922705  | mouse | 211619  |
| 16 | 16q23    | 74093638  | 16q23    | 74225528  | mouse | 131890  |
| 17 | 17p13    | 4482673   | 17p13    | 4525493   | mouse | 42820   |
| 17 | 17p13    | 6691646   | 17p13    | 6793483   | mouse | 101837  |
| 17 | 17p11.2  | 16499527  | 17p11.2  | 16867611  | mouse | 368084  |
| 17 | 17q11.2  | 28705665  | 17q12    | 28911318  | mouse | 205653  |
| 17 | 17q12    | 34312844  | 17q12    | 34569236  | mouse | 256392  |
| 17 | 17q21.2  | 35922531  | 17q21.2  | 36321940  | mouse | 399409  |
| 17 | 17q21.3  | 45860244  | 17q21.3  | 46015760  | mouse | 155516  |
| 17 | 17q23    | 58383936  | 17q23    | 58548204  | mouse | 164268  |
| 17 | 17q24    | 60630038  | 17q24    | 60718303  | mouse | 88265   |
| 17 | 17q24    | 63138272  | 17q24    | 63371415  | mouse | 233143  |
| 17 | 17q24    | 66677334  | 17q24    | 66698486  | mouse | 21152   |
| 18 | 18p11.32 | 2458344   | 18p11.32 | 2533338   | mouse | 74994   |
| 18 | 18p11.2  | 9962250   | 18p11.2  | 11581492  | mouse | 1619242 |
| 18 | 18q12.3  | 40945714  | 18q12.3  | 41245003  | mouse | 299289  |
| 18 | 18q21.3  | 54027458  | 18q21.3  | 54053769  | mouse | 26311   |
| 18 | 18q21.3  | 58048268  | 18q21.3  | 58120930  | mouse | 72662   |
| 18 | 18q22    | 65726427  | 18q22    | 66127867  | mouse | 401440  |
| 19 | 19p13.3  | 4164504   | 19p13.3  | 4171198   | mouse | 6694    |
| 19 | 19p13.2  | 7004895   | 19p13.2  | 7052262   | mouse | 47367   |
| 19 | 19p13.2  | 8217865   | 19p13.2  | 8764217   | mouse | 546352  |
| 19 | 19p13.2  | 12423093  | 19p13.2  | 12602655  | mouse | 179562  |

|    |         |           |         |           |       |         |
|----|---------|-----------|---------|-----------|-------|---------|
| 19 | 19p13.1 | 14516393  | 19p13.1 | 17014817  | mouse | 2498424 |
| 19 | 19q12   | 34763281  | 19q12   | 34775525  | mouse | 12244   |
| 19 | 19q13.3 | 53019374  | 19q13.3 | 53476245  | mouse | 456871  |
| 19 | 19q13.4 | 56776884  | 19q13.4 | 59253187  | mouse | 2476303 |
| 20 | 20p13   | 1390878   | 20p13   | 1695482   | mouse | 304604  |
| 21 | 21q22.3 | 42332141  | 21q22.3 | 42385548  | mouse | 53407   |
| 21 | 21q22.3 | 44025134  | 21q22.3 | 44025334  | mouse | 200     |
| 22 | 22q11.2 | 20662815  | 22q11.2 | 21164977  | mouse | 502162  |
| 22 | 22q11.2 | 23328753  | 22q11.2 | 23526943  | mouse | 198190  |
| 22 | 22q12.1 | 27480781  | 22q12.1 | 27493144  | mouse | 12363   |
| 22 | 22q12.2 | 30335430  | 22q12.3 | 31990642  | mouse | 1655212 |
| 22 | 22q12.3 | 34221854  | 22q12.3 | 34240002  | mouse | 18148   |
| X  | Xp22.11 | 23051645  | Xp22.11 | 23052643  | mouse | 998     |
| X  | Xp21.1  | 36457204  | Xp21.1  | 36457404  | mouse | 200     |
| X  | Xp11.3  | 46711758  | Xp11.3  | 46778868  | mouse | 67110   |
| X  | Xp11.23 | 48895270  | Xp11.23 | 48895407  | mouse | 137     |
| X  | Xp11.22 | 50082060  | Xp11.22 | 51759653  | mouse | 1677593 |
| X  | Xq21.1  | 81290506  | Xq21.1  | 81326323  | mouse | 35817   |
| X  | Xq21.31 | 91417469  | Xq21.31 | 91789772  | mouse | 372303  |
| X  | Xq23    | 112595429 | Xq23    | 113134875 | mouse | 539446  |
| 1  | 1p34.2  | 40197771  | 1p34.2  | 41703838  | pig   | 1506067 |
| 1  | 1p31.1  | 83798949  | 1p22    | 85249768  | pig   | 1450819 |
| 1  | 1q24    | 167431107 | 1q24    | 168874873 | pig   | 1443766 |
| 1  | 1q25    | 181731277 | 1q31    | 184648713 | pig   | 2917436 |
| 1  | 1q31    | 190994647 | 1q31    | 193870329 | pig   | 2875682 |
| 1  | 1q32    | 198449609 | 1q32    | 200753410 | pig   | 2303801 |
| 1  | 1q32    | 202039491 | 1q32    | 205001837 | pig   | 2962346 |
| 1  | 1q32    | 210456462 | 1q41    | 212376628 | pig   | 1920166 |
| 1  | 1q41    | 219283155 | 1q42    | 220460016 | pig   | 1176861 |
| 1  | 1q42    | 220752892 | 1q42    | 221406525 | pig   | 653633  |
| 1  | 1q43    | 236369159 | 1q43    | 237965945 | pig   | 1596786 |
| 1  | 1q43    | 238022215 | 1q43    | 239590636 | pig   | 1568421 |
| 2  | 2q13    | 112349922 | 2q14.1  | 115217387 | pig   | 2867465 |
| 2  | 2q14.2  | 119249570 | 2q14.2  | 120264932 | pig   | 1015362 |
| 2  | 2q14.3  | 126294676 | 2q14.3  | 129361071 | pig   | 3066395 |
| 2  | 2q21.1  | 129726694 | 2q21.2  | 133544712 | pig   | 3818018 |
| 2  | 2q23    | 150240956 | 2q23    | 153535876 | pig   | 3294920 |
| 3  | 3p25    | 14703453  | 3p25    | 15701225  | pig   | 997772  |
| 3  | 3p12    | 75044362  | 3p12    | 75908326  | pig   | 863964  |
| 3  | 3q21    | 126435252 | 3q21    | 128404641 | pig   | 1969389 |
| 3  | 3q21    | 129808134 | 3q21    | 131252843 | pig   | 1444709 |
| 3  | 3q22    | 133084059 | 3q22    | 133494552 | pig   | 410493  |
| 4  | 4p16    | 3429821   | 4p16    | 4521317   | pig   | 1091496 |
| 4  | 4p16    | 8358037   | 4p16    | 9765343   | pig   | 1407306 |
| 4  | 4q12    | 56080333  | 4q12    | 56537476  | pig   | 457143  |
| 4  | 4q21.1  | 78265810  | 4q21.2  | 81743084  | pig   | 3477274 |
| 4  | 4q32    | 156602424 | 4q32    | 156742252 | pig   | 139828  |
| 4  | 4q32    | 156762371 | 4q32    | 157109370 | pig   | 346999  |
| 4  | 4q32    | 165895860 | 4q32    | 166517499 | pig   | 621639  |
| 4  | 4q32    | 167376267 | 4q32    | 168238991 | pig   | 862724  |
| 4  | 4q34    | 176027692 | 4q34    | 177139467 | pig   | 1111775 |
| 4  | 4q35    | 187764074 | 4q35    | 188039292 | pig   | 275218  |
| 5  | 5p15.3  | 9816235   | 5p15.2  | 11484715  | pig   | 1668480 |
| 5  | 5p15.1  | 15881962  | 5p15.1  | 17433872  | pig   | 1551910 |
| 5  | 5q12    | 63253626  | 5q13.1  | 64531560  | pig   | 1277934 |
| 5  | 5q13.2  | 71841995  | 5q13.3  | 73499061  | pig   | 1657066 |
| 5  | 5q33.1  | 150116348 | 5q33.1  | 151807934 | pig   | 1691586 |
| 6  | 6p21.3  | 33972374  | 6p21.2  | 37822747  | pig   | 3850373 |

|    |         |           |         |           |     |         |
|----|---------|-----------|---------|-----------|-----|---------|
| 6  | 6p12    | 51972043  | 6p12    | 53884962  | pig | 1912919 |
| 6  | 6p12    | 63665829  | 6q12    | 64869526  | pig | 1203697 |
| 6  | 6q13    | 73338720  | 6q13    | 74463003  | pig | 1124283 |
| 6  | 6q14    | 83886431  | 6q14    | 85181860  | pig | 1295429 |
| 6  | 6q22.1  | 116138228 | 6q22.1  | 116967010 | pig | 828782  |
| 7  | 7p22    | 6441062   | 7p21    | 7627247   | pig | 1186185 |
| 7  | 7p15.3  | 23255428  | 7p15.3  | 23533384  | pig | 277956  |
| 7  | 7p14    | 37089533  | 7p14    | 38359861  | pig | 1270328 |
| 7  | 7p14    | 38359955  | 7p14    | 41311384  | pig | 2951429 |
| 7  | 7p12    | 47724972  | 7p12    | 49061384  | pig | 1336412 |
| 7  | 7p11.2  | 54932101  | 7p11.2  | 55187352  | pig | 255251  |
| 7  | 7p11.2  | 55187528  | 7p11.2  | 55850025  | pig | 662497  |
| 7  | 7q11.22 | 66101340  | 7q11.22 | 67528444  | pig | 1427104 |
| 7  | 7q11.23 | 71047205  | 7q11.23 | 72247662  | pig | 1200457 |
| 7  | 7q11.23 | 75109793  | 7q11.23 | 76423878  | pig | 1314085 |
| 7  | 7q21.1  | 86671814  | 7q21.1  | 88158441  | pig | 1486627 |
| 7  | 7q21.3  | 96965209  | 7q21.3  | 97627709  | pig | 662500  |
| 7  | 7q22    | 101774951 | 7q22    | 102813928 | pig | 1038977 |
| 7  | 7q31.1  | 107467978 | 7q31.1  | 108915189 | pig | 1447211 |
| 7  | 7q34    | 142089425 | 7q35    | 143474392 | pig | 1384967 |
| 7  | 7q36    | 148209911 | 7q36    | 149974087 | pig | 1764176 |
| 8  | 8p23.1  | 6230255   | 8p23.1  | 8651658   | pig | 2421403 |
| 8  | 8p23.1  | 8651735   | 8p23.1  | 9853036   | pig | 1201301 |
| 8  | 8p23.1  | 11567139  | 8p22    | 12890783  | pig | 1323644 |
| 8  | 8p22    | 16731148  | 8p22    | 17694436  | pig | 963288  |
| 8  | 8p22    | 17694591  | 8p22    | 18346899  | pig | 652308  |
| 8  | 8p22    | 18347274  | 8p21    | 19606244  | pig | 1258970 |
| 8  | 8p21    | 28742821  | 8p12    | 29431481  | pig | 688660  |
| 8  | 8p12    | 38581060  | 8p11.2  | 40042274  | pig | 1461214 |
| 9  | 9p21    | 26715212  | 9p21    | 27647434  | pig | 932222  |
| 9  | 9p13    | 34121663  | 9p13    | 35536320  | pig | 1414657 |
| 9  | 9q21.3  | 78377606  | 9q21.3  | 79695354  | pig | 1317748 |
| 9  | 9q21.3  | 82892439  | 9q21.3  | 85248039  | pig | 2355600 |
| 9  | 9q22.1  | 87692667  | 9q22.1  | 88339269  | pig | 646602  |
| 9  | 9q22.3  | 92303697  | 9q22.3  | 93700832  | pig | 1397135 |
| 10 | 10p14   | 10877661  | 10p13   | 13267035  | pig | 2389374 |
| 10 | 10p12.3 | 18876007  | 10p12.3 | 19796916  | pig | 920909  |
| 10 | 10p12.1 | 26608481  | 10p12.1 | 28183041  | pig | 1574560 |
| 10 | 10p11.2 | 32263726  | 10p11.2 | 33523600  | pig | 1259874 |
| 10 | 10q11.2 | 50573505  | 10q11.2 | 51939578  | pig | 1366073 |
| 10 | 10q23.2 | 88326768  | 10q23.3 | 89470536  | pig | 1143768 |
| 11 | 11p15.5 | 3009963   | 11p15.4 | 5489543   | pig | 2479580 |
| 11 | 11p15.4 | 8973254   | 11p15.4 | 10367590  | pig | 1394336 |
| 11 | 11q13.3 | 70729241  | 11q13.4 | 72154608  | pig | 1425367 |
| 12 | 12q13.1 | 47699745  | 12q13.1 | 49057481  | pig | 1357736 |
| 12 | 12q21.2 | 76569350  | 12q21.2 | 77242591  | pig | 673241  |
| 12 | 12q23   | 105469295 | 12q23   | 106667370 | pig | 1198075 |
| 12 | 12q23   | 107089525 | 12q24.1 | 108559454 | pig | 1469929 |
| 13 | 13q14.1 | 40176697  | 13q14.1 | 41098351  | pig | 921654  |
| 13 | 13q14.3 | 51972222  | 13q14.3 | 52631199  | pig | 658977  |
| 14 | 14q13   | 36324614  | 14q21   | 37751799  | pig | 1427185 |
| 14 | 14q23   | 61777163  | 14q23   | 62931020  | pig | 1153857 |
| 15 | 15q13   | 29402166  | 15q13   | 30743993  | pig | 1341827 |
| 15 | 15q23   | 69197530  | 15q24   | 70944247  | pig | 1746717 |
| 15 | 15q24   | 74986799  | 15q25   | 76456570  | pig | 1469771 |
| 15 | 15q25   | 83207550  | 15q25   | 84671483  | pig | 1463933 |
| 15 | 15q25   | 86128267  | 15q26.1 | 87751893  | pig | 1623626 |
| 15 | 15q25   | 87751992  | 15q26.1 | 89487902  | pig | 1735910 |



|    |         |           |         |           |     |         |
|----|---------|-----------|---------|-----------|-----|---------|
| 15 | 15q26.3 | 96367453  | 15q26.3 | 97577819  | pig | 1210366 |
| 16 | 16q12.2 | 54868307  | 16q13   | 56526953  | pig | 1658646 |
| 16 | 16q22   | 68066139  | 16q22   | 69282946  | pig | 1216807 |
| 17 | 17p11.2 | 17657721  | 17p11.2 | 20549774  | pig | 2892053 |
| 17 | 17q21.1 | 35262313  | 17q21.2 | 36392035  | pig | 1129722 |
| 17 | 17q21.3 | 45255531  | 17q21.3 | 46766362  | pig | 1510831 |
| 17 | 17q24   | 60291685  | 17q24   | 61687279  | pig | 1395594 |
| 18 | 18q12.3 | 40509868  | 18q21.1 | 42425486  | pig | 1915618 |
| 18 | 18q21.3 | 54938704  | 18q21.3 | 56271424  | pig | 1332720 |
| 20 | 20p13   | 2630616   | 20p13   | 4787917   | pig | 2157301 |
| 22 | 22q11.2 | 16689189  | 22q11.2 | 17426974  | pig | 737785  |
| 22 | 22q11.2 | 22450228  | 22q11.2 | 23710146  | pig | 1259918 |
| 22 | 22q12.2 | 29660438  | 22q12.3 | 31522202  | pig | 1861764 |
| 1  | 1p36.1  | 26032778  | 1p36.1  | 26124267  | rat | 91489   |
| 1  | 1p36.1  | 27828854  | 1p35    | 28515209  | rat | 686355  |
| 1  | 1p32    | 58369437  | 1p32    | 58479571  | rat | 110134  |
| 1  | 1p31.2  | 66969868  | 1p31.2  | 67947982  | rat | 978114  |
| 1  | 1p22    | 89073417  | 1p22    | 89186870  | rat | 113453  |
| 1  | 1p22    | 93175146  | 1p22    | 93258183  | rat | 83037   |
| 1  | 1q23    | 154930185 | 1q23    | 155307838 | rat | 377653  |
| 1  | 1q32    | 204176920 | 1q32    | 204247249 | rat | 70329   |
| 1  | 1q42    | 220819436 | 1q42    | 220822552 | rat | 3116    |
| 1  | 1q42    | 222372946 | 1q42    | 222417687 | rat | 44741   |
| 1  | 1q42    | 224015581 | 1q42    | 225323048 | rat | 1307467 |
| 1  | 1q42    | 231579499 | 1q42    | 232260182 | rat | 680683  |
| 1  | 1q43    | 236371426 | 1q43    | 236517934 | rat | 146508  |
| 2  | 2p25.3  | 3119186   | 2p25.3  | 3235032   | rat | 115846  |
| 2  | 2p22    | 35636081  | 2p22    | 35766488  | rat | 130407  |
| 2  | 2p13    | 68650881  | 2p13    | 68652166  | rat | 1285    |
| 2  | 2p13    | 70975429  | 2p13    | 71005286  | rat | 29857   |
| 2  | 2p13    | 73965750  | 2p13    | 74013786  | rat | 48036   |
| 2  | 2q13    | 113552965 | 2q14.1  | 114343565 | rat | 790600  |
| 2  | 2q14.3  | 122430979 | 2q14.3  | 123481484 | rat | 1050505 |
| 2  | 2q14.3  | 124108818 | 2q14.3  | 124109018 | rat | 200     |
| 2  | 2q14.3  | 124817492 | 2q14.3  | 125203982 | rat | 386490  |
| 2  | 2q14.3  | 127021977 | 2q14.3  | 127091697 | rat | 69720   |
| 2  | 2q14.3  | 128691458 | 2q14.3  | 128726070 | rat | 34612   |
| 2  | 2q21.1  | 131934198 | 2q21.2  | 133161439 | rat | 1227241 |
| 2  | 2q22    | 138624341 | 2q22    | 139955364 | rat | 1331023 |
| 2  | 2q32.1  | 188356222 | 2q32.1  | 188704047 | rat | 347825  |
| 3  | 3p25    | 12864965  | 3p25    | 12997408  | rat | 132443  |
| 3  | 3p25    | 15135116  | 3p24    | 16857271  | rat | 1722155 |
| 3  | 3p24    | 20077802  | 3p24    | 21184398  | rat | 1106596 |
| 3  | 3p24    | 27569115  | 3p24    | 27605472  | rat | 36357   |
| 3  | 3p22    | 37074253  | 3p22    | 37082950  | rat | 8697    |
| 3  | 3p21.3  | 46267172  | 3p21.3  | 46267372  | rat | 200     |
| 3  | 3p21.2  | 52076095  | 3p21.2  | 52207798  | rat | 131703  |
| 3  | 3p14.3  | 57767106  | 3p14.3  | 57799917  | rat | 32811   |
| 3  | 3p14.1  | 63864176  | 3p14.1  | 63872656  | rat | 8480    |
| 3  | 3p12    | 75103631  | 3p12    | 75681020  | rat | 577389  |
| 3  | 3q21    | 126603810 | 3q21    | 127260234 | rat | 656424  |
| 3  | 3q21    | 130317226 | 3q21    | 131213237 | rat | 896011  |
| 3  | 3q24    | 149369030 | 3q24    | 150339280 | rat | 970250  |
| 3  | 3q26.1  | 169224071 | 3q26.2  | 169304900 | rat | 80829   |
| 3  | 3q26.2  | 170409406 | 3q26.2  | 170471630 | rat | 62224   |
| 3  | 3q26.3  | 173034682 | 3q26.3  | 173196601 | rat | 161919  |
| 3  | 3q26.3  | 179507657 | 3q26.3  | 179525339 | rat | 17682   |
| 3  | 3q27    | 184219239 | 3q26.3  | 184255517 | rat | 36278   |

|   |         |           |         |           |     |         |
|---|---------|-----------|---------|-----------|-----|---------|
| 3 | 3q29    | 196679158 | 3q29    | 196836695 | rat | 157537  |
| 4 | 4p16    | 3792758   | 4p16    | 4200472   | rat | 407714  |
| 4 | 4p16    | 8859586   | 4p16    | 9502717   | rat | 643131  |
| 4 | 4q22    | 89376336  | 4q22    | 89376536  | rat | 200     |
| 4 | 4q22    | 95664969  | 4q22    | 95684734  | rat | 19765   |
| 4 | 4q26    | 121086934 | 4q27    | 121332486 | rat | 245552  |
| 4 | 4q27    | 122837455 | 4q27    | 122837655 | rat | 200     |
| 4 | 4q31.1  | 141655864 | 4q31.1  | 141717796 | rat | 61932   |
| 4 | 4q31.2  | 151353028 | 4q31.2  | 151432923 | rat | 79895   |
| 4 | 4q32    | 163624597 | 4q32    | 163977702 | rat | 353105  |
| 5 | 5p15.3  | 7932916   | 5p15.3  | 7963957   | rat | 31041   |
| 5 | 5q15    | 96161776  | 5q15    | 96215463  | rat | 53687   |
| 5 | 5q21    | 98424895  | 5q21    | 98425095  | rat | 200     |
| 5 | 5q22    | 110087815 | 5q22    | 110330256 | rat | 242441  |
| 5 | 5q22    | 112325253 | 5q22    | 112339704 | rat | 14451   |
| 5 | 5q23.3  | 130393520 | 5q23.3  | 130515065 | rat | 121545  |
| 5 | 5q31.1  | 134075456 | 5q31.1  | 134105170 | rat | 29714   |
| 5 | 5q31.1  | 137121696 | 5q31.1  | 137256947 | rat | 135251  |
| 5 | 5q32    | 147607546 | 5q32    | 147631363 | rat | 23817   |
| 5 | 5q33.1  | 150210048 | 5q33.1  | 150367789 | rat | 157741  |
| 5 | 5q33.2  | 154317378 | 5q33.2  | 154317578 | rat | 200     |
| 5 | 5q35    | 173646386 | 5q35    | 173698426 | rat | 52040   |
| 5 | 5q35    | 177105027 | 5q35    | 177490456 | rat | 385429  |
| 6 | 6p22.3  | 20093794  | 6p22.3  | 20127761  | rat | 33967   |
| 6 | 6p22.1  | 29101707  | 6p22.1  | 29140900  | rat | 39193   |
| 6 | 6p21.2  | 39059211  | 6p21.2  | 39329540  | rat | 270329  |
| 6 | 6p12    | 52755093  | 6p12    | 52774746  | rat | 19653   |
| 6 | 6p12    | 55784286  | 6p12    | 56226463  | rat | 442177  |
| 6 | 6q13    | 73859514  | 6q13    | 74013463  | rat | 153949  |
| 6 | 6q14    | 86415489  | 6q14    | 87745595  | rat | 1330106 |
| 6 | 6q16.3  | 100244557 | 6q16.3  | 100628426 | rat | 383869  |
| 6 | 6q22.1  | 116674806 | 6q22.1  | 116937701 | rat | 262895  |
| 6 | 6q22.3  | 123081845 | 6q22.3  | 123117471 | rat | 35626   |
| 6 | 6q22.3  | 127848358 | 6q22.3  | 127948896 | rat | 100538  |
| 6 | 6q23.2  | 135138941 | 6q23.2  | 135157113 | rat | 18172   |
| 6 | 6q25.1  | 150165506 | 6q25.1  | 150166635 | rat | 1129    |
| 7 | 7p22    | 5502967   | 7p22    | 6801465   | rat | 1298498 |
| 7 | 7p21    | 12240731  | 7p21    | 12274933  | rat | 34202   |
| 7 | 7p21    | 19459102  | 7p21    | 19463760  | rat | 4658    |
| 7 | 7p15.3  | 22306265  | 7p15.3  | 22964127  | rat | 657862  |
| 7 | 7p14    | 32734941  | 7p14    | 32735141  | rat | 200     |
| 7 | 7p14    | 36046504  | 7p14    | 36231138  | rat | 184634  |
| 7 | 7p13    | 43312412  | 7p13    | 43623045  | rat | 310633  |
| 7 | 7q11.23 | 71402623  | 7q11.23 | 72124837  | rat | 722214  |
| 7 | 7q11.23 | 73887786  | 7q11.23 | 76415937  | rat | 2528151 |
| 7 | 7q21.3  | 97029493  | 7q21.3  | 97265749  | rat | 236256  |
| 7 | 7q22    | 99027359  | 7q22    | 101963289 | rat | 2935930 |
| 7 | 7q22    | 104742436 | 7q22    | 104755479 | rat | 13043   |
| 7 | 7q31.1  | 107320004 | 7q31.1  | 107322860 | rat | 2856    |
| 7 | 7q31.1  | 111678926 | 7q31.1  | 111686343 | rat | 7417    |
| 7 | 7q36    | 149864544 | 7q36    | 149903378 | rat | 38834   |
| 7 | 7q36    | 156529297 | 7q36    | 156553362 | rat | 24065   |
| 8 | 8p23.1  | 7500178   | 8p23.1  | 7981888   | rat | 481710  |
| 8 | 8p23.1  | 9510886   | 8p23.1  | 9579292   | rat | 68406   |
| 8 | 8p23.1  | 11711648  | 8p23.1  | 12355545  | rat | 643897  |
| 8 | 8p22    | 17763927  | 8p22    | 17802310  | rat | 38383   |
| 8 | 8p21    | 19985979  | 8p21    | 20008284  | rat | 22305   |
| 8 | 8p12    | 28970543  | 8p12    | 29011057  | rat | 40514   |

|    |          |           |          |           |     |         |
|----|----------|-----------|----------|-----------|-----|---------|
| 8  | 8p12     | 36492063  | 8p12     | 36496263  | rat | 4200    |
| 8  | 8p12     | 37734651  | 8p12     | 37734851  | rat | 200     |
| 8  | 8q12     | 62410873  | 8q12     | 62417430  | rat | 6557    |
| 8  | 8q12     | 63721790  | 8q12     | 63806443  | rat | 84653   |
| 8  | 8q13     | 67053743  | 8q13     | 67053943  | rat | 200     |
| 8  | 8q21.1   | 75892926  | 8q21.1   | 75921289  | rat | 28363   |
| 8  | 8q21.2   | 86714895  | 8q21.2   | 86722524  | rat | 7629    |
| 8  | 8q22.1   | 96911668  | 8q22.1   | 96916524  | rat | 4856    |
| 9  | 9p24     | 6655150   | 9p24     | 6733134   | rat | 77984   |
| 9  | 9p21     | 27287159  | 9p21     | 27315090  | rat | 27931   |
| 9  | 9q21.2   | 76347373  | 9q21.2   | 76563748  | rat | 216375  |
| 9  | 9q21.3   | 79693982  | 9q21.3   | 79793107  | rat | 99125   |
| 9  | 9q21.3   | 83878609  | 9q21.3   | 84125800  | rat | 247191  |
| 9  | 9q22.2   | 88142780  | 9q22.1   | 88302235  | rat | 159455  |
| 9  | 9q22.2   | 90365402  | 9q22.2   | 90648715  | rat | 283313  |
| 9  | 9q22.3   | 93280543  | 9q22.3   | 93496294  | rat | 215751  |
| 9  | 9q33     | 116942049 | 9q33     | 116994930 | rat | 52881   |
| 9  | 9q33     | 121405175 | 9q33     | 121405737 | rat | 562     |
| 9  | 9q33     | 124512769 | 9q33     | 124533010 | rat | 20241   |
| 9  | 9q34.1   | 127758645 | 9q34.1   | 127848066 | rat | 89421   |
| 9  | 9q34.1   | 129385133 | 9q34.1   | 129454199 | rat | 69066   |
| 9  | 9q34.1   | 131919050 | 9q34.1   | 131962047 | rat | 42997   |
| 10 | 10p12.1  | 27676319  | 10p12.1  | 27737515  | rat | 61196   |
| 10 | 10p12.1  | 29062258  | 10p11.2  | 29906905  | rat | 844647  |
| 10 | 10p11.2  | 31026991  | 10p11.2  | 31103607  | rat | 76616   |
| 10 | 10p11.2  | 32605919  | 10p11.2  | 32895213  | rat | 289294  |
| 10 | 10p11.2  | 35324029  | 10p11.2  | 35770605  | rat | 446576  |
| 10 | 10q11.2  | 46002988  | 10q11.2  | 46482643  | rat | 479655  |
| 10 | 10q11.2  | 51472743  | 10q11.2  | 51895360  | rat | 422617  |
| 10 | 10q21.1  | 54432491  | 10q21.1  | 55049876  | rat | 617385  |
| 10 | 10q21.3  | 68040493  | 10q21.3  | 68145137  | rat | 104644  |
| 10 | 10q22.1  | 70347467  | 10q21.3  | 70373196  | rat | 25729   |
| 10 | 10q22.1  | 74077294  | 10q22.2  | 74762933  | rat | 685639  |
| 10 | 10q22.3  | 79620307  | 10q22.3  | 79633405  | rat | 13098   |
| 10 | 10q22.3  | 81955638  | 10q22.3  | 81955838  | rat | 200     |
| 10 | 10q23.2  | 89041450  | 10q23.3  | 89391808  | rat | 350358  |
| 10 | 10q24.1  | 99061758  | 10q24.2  | 99424005  | rat | 362247  |
| 10 | 10q24.2  | 101662335 | 10q24.2  | 101763891 | rat | 101556  |
| 10 | 10q26.1  | 121313866 | 10q26.1  | 121314066 | rat | 200     |
| 11 | 11p15.5  | 3213050   | 11p15.4  | 3590341   | rat | 377291  |
| 11 | 11p15.1  | 17406125  | 11p15.1  | 17417333  | rat | 11208   |
| 11 | 11p14    | 25987264  | 11p14    | 26247249  | rat | 259985  |
| 11 | 11q12    | 58011814  | 11q12    | 58065769  | rat | 53955   |
| 11 | 11q13.3  | 71432282  | 11q13.4  | 71849781  | rat | 417499  |
| 11 | 11q14.3  | 89523970  | 11q14.3  | 90045091  | rat | 521121  |
| 11 | 11q22.3  | 106828099 | 11q22.3  | 107486944 | rat | 658845  |
| 12 | 12p13.3  | 2682525   | 12p13.3  | 2783499   | rat | 100974  |
| 12 | 12p13.3  | 9174615   | 12p13.3  | 9282216   | rat | 107601  |
| 12 | 12q13.2  | 54965452  | 12q13.3  | 55441278  | rat | 475826  |
| 12 | 12q14    | 56862885  | 12q14    | 56948908  | rat | 86023   |
| 12 | 12q24.1  | 108109650 | 12q24.1  | 108258446 | rat | 148796  |
| 12 | 12q24.1  | 110355800 | 12q24.1  | 110410425 | rat | 54625   |
| 12 | 12q24.31 | 121274782 | 12q24.31 | 121375704 | rat | 100922  |
| 13 | 13q12.1  | 22757233  | 13q12.1  | 25724393  | rat | 2967160 |
| 13 | 13q13    | 33345993  | 13q13    | 33401983  | rat | 55990   |
| 13 | 13q14.1  | 40188271  | 13q14.1  | 40426525  | rat | 238254  |
| 13 | 13q14.2  | 48715417  | 13q14.2  | 49130912  | rat | 415495  |
| 13 | 13q14.3  | 51291706  | 13q14.3  | 52174714  | rat | 883008  |

|    |         |           |         |           |     |         |
|----|---------|-----------|---------|-----------|-----|---------|
| 13 | 13q33   | 101917852 | 13q33   | 102376524 | rat | 458672  |
| 14 | 14q11.2 | 23137497  | 14q11.2 | 23141966  | rat | 4469    |
| 14 | 14q22   | 50241915  | 14q21   | 50686858  | rat | 444943  |
| 14 | 14q22   | 56619173  | 14q22   | 56657935  | rat | 38762   |
| 15 | 15q13   | 26033210  | 15q13   | 26807344  | rat | 774134  |
| 15 | 15q13   | 27946401  | 15q13   | 28553095  | rat | 606694  |
| 15 | 15q13   | 29997953  | 15q13   | 30504576  | rat | 506623  |
| 15 | 15q14   | 32238453  | 15q14   | 32516158  | rat | 277705  |
| 15 | 15q21.1 | 48877128  | 15q21.1 | 49543926  | rat | 666798  |
| 15 | 15q24   | 73600262  | 15q24   | 73683939  | rat | 83677   |
| 15 | 15q24   | 75763740  | 15q24   | 75869872  | rat | 106132  |
| 15 | 15q25   | 77858828  | 15q25   | 77875892  | rat | 17064   |
| 15 | 15q25   | 80152765  | 15q25   | 80799598  | rat | 646833  |
| 15 | 15q25   | 82374406  | 15q25   | 83433609  | rat | 1059203 |
| 15 | 15q25   | 89153038  | 15q26.1 | 89189475  | rat | 36437   |
| 16 | 16p13.1 | 15528691  | 16p13.1 | 16628631  | rat | 1099940 |
| 16 | 16p12   | 18203373  | 16p12   | 18738281  | rat | 534908  |
| 16 | 16q13   | 55602137  | 16q13   | 55614699  | rat | 12562   |
| 16 | 16q22   | 66704022  | 16q22   | 66730663  | rat | 26641   |
| 16 | 16q22   | 69711086  | 16q22   | 69863578  | rat | 152492  |
| 16 | 16q23   | 74093662  | 16q23   | 74169441  | rat | 75779   |
| 17 | 17p13   | 4482673   | 17p13   | 4525491   | rat | 42818   |
| 17 | 17p13   | 6691571   | 17p13   | 6748387   | rat | 56816   |
| 17 | 17q11.2 | 27510680  | 17q12   | 30313282  | rat | 2802602 |
| 17 | 17q12   | 34303780  | 17q12   | 34573463  | rat | 269683  |
| 17 | 17q21.2 | 35922531  | 17q21.2 | 36319889  | rat | 397358  |
| 17 | 17q21.3 | 44302688  | 17q21.3 | 45911385  | rat | 1608697 |
| 17 | 17q23   | 58283088  | 17q23   | 58548204  | rat | 265116  |
| 17 | 17q24   | 60629869  | 17q24   | 60718284  | rat | 88415   |
| 17 | 17q24   | 63138270  | 17q24   | 63380818  | rat | 242548  |
| 17 | 17q24   | 66449451  | 17q24   | 66733287  | rat | 283836  |
| 18 | 18p11.2 | 9962013   | 18p11.2 | 11658515  | rat | 1696502 |
| 18 | 18q12.3 | 40945714  | 18q12.3 | 41245003  | rat | 299289  |
| 18 | 18q21.3 | 53943062  | 18q21.3 | 54053467  | rat | 110405  |
| 18 | 18q21.3 | 58048268  | 18q21.3 | 58119068  | rat | 70800   |
| 18 | 18q22   | 65639416  | 18q22   | 66443224  | rat | 803808  |
| 19 | 19p13.3 | 4164193   | 19p13.2 | 7054475   | rat | 2890282 |
| 19 | 19p13.2 | 8217968   | 19p13.2 | 9237754   | rat | 1019786 |
| 19 | 19p13.2 | 11509875  | 19p13.2 | 12602657  | rat | 1092782 |
| 19 | 19p13.1 | 14528147  | 19p13.1 | 14791338  | rat | 263191  |
| 19 | 19p13.1 | 15948062  | 19p13.1 | 16027834  | rat | 79772   |
| 19 | 19q12   | 34786782  | 19q12   | 34786982  | rat | 200     |
| 19 | 19q13.3 | 53042981  | 19q13.3 | 53477270  | rat | 434289  |
| 19 | 19q13.4 | 56776887  | 19q13.4 | 59398235  | rat | 2621348 |
| 20 | 20p13   | 1390268   | 20p13   | 1695883   | rat | 305615  |
| 21 | 21q22.3 | 42332141  | 21q22.3 | 42385504  | rat | 53363   |
| 22 | 22q12.1 | 27480724  | 22q12.1 | 27493144  | rat | 12420   |
| 22 | 22q12.3 | 30824528  | 22q12.3 | 31992586  | rat | 1168058 |
| 22 | 22q12.3 | 34221854  | 22q12.3 | 34241294  | rat | 19440   |
| X  | Xp22.11 | 23022644  | Xp22.11 | 23052913  | rat | 30269   |
| X  | Xp21.1  | 36161279  | Xp21.1  | 36214921  | rat | 53642   |
| X  | Xp11.3  | 46346466  | Xp11.3  | 46900013  | rat | 553547  |
| X  | Xp11.23 | 48894439  | Xp11.22 | 51759026  | rat | 2864587 |
| X  | Xq22.3  | 105353823 | Xq22.3  | 105436249 | rat | 82426   |
| X  | Xq23    | 113262020 | Xq23    | 113413379 | rat | 151359  |
| X  | Xq25    | 123820873 | Xq25    | 124040790 | rat | 219917  |
