# Supplementary material for: Is mammalian chromosomal evolution driven by regions of genome fragility?
Source: PubMed Central journal article supplement (PMC1794428; doi:10.1186/gb-2006-7-12-r115), 2006-12-08
Supplement: gb-2006-7-12-r115-S6.pdf [file gb-2006-7-12-r115-S6.pdf]

**Table S3:** Evolutionary chromosomal bands detected.

| Evolutionary chromosomal band | from        | to          | n° evolutionary breakpoints | species                                      | fs/no fs     | type fs     |
|-------------------------------|-------------|-------------|-----------------------------|----------------------------------------------|--------------|-------------|
| 10p11.2                       | 29,401,000  | 38,801,000  | 28                          | cattle mouse pig rat dog                     | no fs        |             |
| 10p12.1                       | 24,599,001  | 29,401,000  | 10                          | dog mouse pig rat                            | no fs        |             |
| 10p12.3                       | 17,301,000  | 22,601,000  | 4                           | cat pig                                      | no fs        |             |
| 10p13                         | 12,301,000  | 17,301,000  | 5                           | mouse pig + chicken                          | no fs        |             |
| 10p14                         | 6,699,001   | 12,301,000  | 2                           | pig + chicken                                | no fs        |             |
| 10p15                         | 1           | 6,701,000   | 5                           | mouse + chicken                              | no fs        |             |
| 10q11.2                       | 41,899,001  | 52,601,000  | 30                          | cattle mouse pig rat dog + chicken           | fs           | common      |
| 10q21.1                       | 52,599,001  | 60,801,000  | 12                          | cattle mouse rat + chicken                   | fs           | common      |
| 10q21.2                       | 60,801,000  | 64,201,000  | 2                           | cattle + chicken                             | fs           | common      |
| 10q21.3                       | 64,201,000  | 70,301,000  | 5                           | rat + chicken                                | fs           | common      |
| 10q22.1                       | 70,301,000  | 74,601,000  | 3                           | rat + chicken                                | fs           | common      |
| 10q22.2                       | 74,601,000  | 77,699,001  | 4                           | mouse rat + chicken                          | no fs        |             |
| 10q22.3                       | 77,699,001  | 82,901,000  | 9                           | mouse rat + chicken                          | no fs        |             |
| 10q23.1                       | 82,901,000  | 86,799,001  | 1                           | chicken                                      | no fs        |             |
| 10q23.2                       | 86,799,001  | 89,101,000  | 4                           | mouse pig rat + chicken                      | no fs        |             |
| 10q23.3                       | 89,101,000  | 96,999,001  | 8                           | mouse pig rat + chicken                      | no fs        |             |
| 10q24.1                       | 96,999,001  | 99,299,001  | 7                           | rat + chicken                                | fs           | rare        |
| 10q24.2                       | 99,299,001  | 101,901,000 | 4                           | rat + chicken                                | no fs        |             |
| 10q24.3                       | 101,901,000 | 105,699,001 | 10                          | cat + chicken                                | no fs        |             |
| 10q25.1                       | 105,699,001 | 111,801,000 | 1                           | cat                                          | no fs        |             |
| 10q26.1                       | 118,699,001 | 127,401,000 | 5                           | mouse rat + chicken                          | fs           | common      |
| 10q26.2                       | 127,401,000 | 130,501,000 | 1                           | chicken                                      | no fs        |             |
| 11p11.12                      | 48,801,000  | 51,500,000  | 2                           | chicken                                      | no fs        |             |
| 11p11.2                       | 43,399,001  | 48,801,000  | 2                           | dog                                          | no fs        |             |
| 11p13                         | 31,001,000  | 36,401,000  | 4                           | cat + chicken                                | fs           | common      |
| 11p14                         | 21,601,000  | 31,001,000  | 8                           | cattle mouse rat dog                         | fs (11p14.2) | common      |
| 11p15.1                       | 16,101,000  | 21,601,000  | 8                           | mouse rat cattle + chicken                   | fs           | common/rare |
| 11p15.2                       | 12,601,000  | 16,101,000  | 4                           | chicken                                      | no fs        |             |
| 11p15.4                       | 2,799,001   | 10,701,000  | 17                          | dog pig cat cattle horse mouse rat + chicken | no fs        |             |

|          |             |             |    |                                              |       |             |
|----------|-------------|-------------|----|----------------------------------------------|-------|-------------|
| 11p15.5  | 1           | 2,799,001   | 11 | dog pig cat cattle horse mouse rat + chicken | no fs |             |
| 11q12    | 56,699,001  | 63,101,000  | 10 | cattle mouse rat dog                         | no fs |             |
| 11q13.1  | 65,601,000  | 65,601,000  | 1  | mouse                                        | fs    | common      |
| 11q13.3  | 68,299,001  | 70,001,000  | 7  | cat cattle mouse pig rat                     | fs    | common/rare |
| 11q13.4  | 70,001,000  | 74,899,001  | 12 | cat cattle mouse pig rat dog + chicken       | fs    | common      |
| 11q13.5  | 74,899,001  | 77,401,000  | 3  | cattle + chicken                             | fs    | common      |
| 11q14.1  | 77,401,000  | 85,301,000  | 5  | cattle                                       | no fs |             |
| 11q14.3  | 87,799,001  | 92,101,000  | 4  | mouse rat                                    | no fs |             |
| 11q22.1  | 96,399,001  | 101,201,000 | 3  | cat dog                                      | no fs |             |
| 11q22.2  | 101,201,000 | 102,399,001 | 1  | cat                                          | no fs |             |
| 11q22.3  | 102,399,001 | 110,001,000 | 7  | cattle mouse rat + chicken                   | no fs |             |
| 11q23.1  | 110,001,000 | 112,701,000 | 1  | chicken                                      | no fs |             |
| 11q24    | 121,199,001 | 130,301,000 | 2  | cattle                                       | no fs |             |
| 12p11.2  | 26,399,001  | 33,201,000  | 4  | chicken                                      | no fs |             |
| 12p13.3  | 1           | 10,101,000  | 10 | dog mouse rat                                | no fs |             |
| 12q13.1  | 44,599,001  | 53,101,000  | 2  | pig                                          | fs    | rare        |
| 12q13.2  | 53,101,000  | 54,899,001  | 5  | cattle dog mouse rat                         | no fs |             |
| 12q13.3  | 54,899,001  | 56,301,000  | 3  | cattle mouse rat                             | no fs |             |
| 12q14    | 56,301,000  | 66,101,000  | 2  | rat                                          | no fs |             |
| 12q21.1  | 70,099,001  | 74,301,000  | 2  | dog                                          | no fs |             |
| 12q21.2  | 74,301,000  | 78,901,000  | 2  | pig                                          | no fs |             |
| 12q22    | 91,199,001  | 94,701,000  | 1  | cattle                                       | no fs |             |
| 12q23    | 94,701,000  | 107,501,000 | 14 | mouse pig cattle dog + chicken               | no fs |             |
| 12q24.1  | 107,501,000 | 112,801,000 | 13 | mouse rat pig dog + chicken                  | fs    | common/rare |
| 12q24.31 | 119,299,001 | 125,401,000 | 6  | mouse rat + chicken                          | fs    | common      |
| 13q12.1  | 18,399,001  | 26,601,000  | 6  | cattle mouse rat                             | no fs |             |
| 13q13    | 31,099,001  | 39,001,000  | 4  | mouse rat                                    | fs    | common      |
| 13q14.1  | 39,001,000  | 46,199,001  | 10 | horse mouse pig rat dog                      | no fs |             |
| 13q14.2  | 46,199,001  | 49,801,000  | 4  | mouse rat                                    | no fs |             |
| 13q14.3  | 49,801,000  | 54,201,000  | 10 | dog mouse pig rat                            | no fs |             |
| 13q31    | 77,899,001  | 93,801,000  | 2  | chicken                                      | no fs |             |
| 13q33    | 100,499,001 | 109,101,000 | 6  | mouse rat + chicken                          | no fs |             |
| 14q11.2  | 18,999,001  | 24,301,000  | 6  | dog mouse rat                                | no fs |             |
| 14q13    | 32,399,001  | 36,901,000  | 1  | pig                                          | no fs |             |

|         |             |             |    |                                        |              |             |
|---------|-------------|-------------|----|----------------------------------------|--------------|-------------|
| 14q21   | 36,901,000  | 50,099,001  | 4  | cattle mouse pig rat                   | no fs        |             |
| 14q22   | 50,099,001  | 57,201,000  | 9  | cattle mouse rat                       | no fs        |             |
| 14q23   | 57,201,000  | 67,001,000  | 2  | pig                                    | fs           | common      |
| 14q32.3 | 100,399,001 | 106,368,585 | 2  | chicken                                | no fs        |             |
| 15q11.2 | 18,299,001  | 23,201,000  | 6  | dog + chicken                          | no fs        |             |
| 15q12   | 23,201,000  | 25,701,000  | 1  | chicken                                | no fs        |             |
| 15q13   | 25,701,000  | 31,399,001  | 28 | cat cattle mouse pig rat dog + chicken | no fs        |             |
| 15q14   | 31,399,001  | 37,901,000  | 2  | rat                                    | no fs        |             |
| 15q15   | 37,901,000  | 42,601,000  | 10 | cattle + chicken                       | no fs        |             |
| 15q21.1 | 42,601,000  | 47,501,000  | 6  | rat + chicken                          | no fs        |             |
| 15q22.3 | 61,499,001  | 65,301,000  | 6  | cattle + chicken                       | fs           | common      |
| 15q23   | 65,301,000  | 70,399,001  | 6  | cattle pig + chicken                   | no fs        |             |
| 15q24   | 70,399,001  | 76,101,000  | 19 | cattle pig rat dog + chicken           | no fs        |             |
| 15q25   | 76,101,000  | 86,899,001  | 33 | cat mouse pig rat dog + chicken        | no fs        |             |
| 15q26.1 | 86,899,001  | 92,101,000  | 10 | cat cattle mouse pig rat dog + chicken | no fs        |             |
| 15q26.3 | 96,299,001  | 100,338,915 | 3  | dog mouse pig rat + chicken            | no fs        |             |
| 16p11.2 | 27,601,000  | 34,401,000  | 7  | dog pig                                | no fs        |             |
| 16p12   | 16,701,000  | 27,601,000  | 7  | dog + chicken                          | no fs        |             |
| 16p13.1 | 10,299,001  | 16,701,000  | 8  | mouse rat + chicken                    | fs (16p12.1) | rare        |
| 16p13.3 | 1           | 6,301,000   | 16 | mouse rat + chicken                    | fs           | rare        |
| 16q12.1 | 45,499,001  | 51,201,000  | 2  | mouse + chicken                        | no fs        |             |
| 16q12.2 | 51,201,000  | 55,301,000  | 1  | dog                                    | no fs        |             |
| 16q13   | 55,301,000  | 56,701,000  | 3  | pig                                    | no fs        |             |
| 16q21   | 56,701,000  | 63,899,001  | 4  | rat pig                                | no fs        |             |
| 16q22   | 63,899,001  | 73,801,000  | 17 | dog + chicken                          | no fs        |             |
| 16q23   | 73,801,000  | 82,701,000  | 9  | cattle mouse pig rat + chicken         | fs (16q22.1) | common/rare |
| 17p11.2 | 15,899,001  | 22,101,000  | 8  | cattle mouse rat + chicken             | no fs        |             |
| 17p12   | 10,699,001  | 15,899,001  | 2  | dog mouse pig + chicken                | no fs        |             |
| 17p13   | 1           | 10,699,001  | 20 | chicken                                | fs           | rare        |
| 17q11.2 | 22,799,001  | 28,801,000  | 8  | mouse rat dog + chicken                | no fs        |             |
| 17q12   | 28,799,001  | 35,201,000  | 8  | cattle mouse rat dog + chicken         | no fs        |             |
| 17q21.1 | 35,201,000  | 35,599,001  | 1  | dog mouse rat                          | no fs        |             |
| 17q21.2 | 35,599,001  | 38,201,000  | 5  | pig                                    | no fs        |             |
| 17q21.3 | 38,201,000  | 47,501,000  | 14 | mouse rat pig                          | no fs        |             |
|         |             |             |    | cat cattle mouse pig rat + chicken     | no fs        |             |

|          |             |             |    |        |         |         |         |         |         |     |              |        |
|----------|-------------|-------------|----|--------|---------|---------|---------|---------|---------|-----|--------------|--------|
| 17q23    | 59,899,001  | 59,899,001  | 12 | cat    | cat     | cat     | mouse   | mouse   | rat     | +   | chicken      | common |
| 17q24    | 59,899,001  | 68,401,000  | 24 | cattle | horse   | mouse   | rat     | cat     | dog     | pig | fs (17q23.1) | no fs  |
| 17q25    | 68,401,000  | 78,774,742  | 4  |        |         |         | chicken |         |         |     | no fs        |        |
| 18p11.2  | 7,199,001   | 15,401,000  | 12 | mouse  | rat     | dog     | +       | chicken |         |     | no fs        |        |
| 18p11.32 | 1           | 2,901,000   | 2  |        |         |         | mouse   |         |         |     | no fs        |        |
| 18q11.2  | 17,299,001  | 23,301,000  | 2  | dog    | +       | chicken |         |         |         |     | no fs        |        |
| 18q12.2  | 30,999,001  | 35,501,000  | 5  | cattle | +       | chicken |         |         |         |     | fs           | common |
| 18q12.3  | 35,501,000  | 41,801,000  | 6  | cattle | mouse   | pig     | rat     |         |         |     | no fs        |        |
| 18q21.1  | 41,801,000  | 48,501,000  | 9  | cattle | dog     | pig     | +       | chicken |         |     | no fs        |        |
| 18q21.3  | 52,499,001  | 59,801,000  | 11 | mouse  | pig     | rat     | +       | chicken |         |     | fs           | common |
| 18q22    | 59,801,000  | 71,299,001  | 7  | cattle | mouse   | rat     | +       | chicken |         |     | fs (18q22.1) | rare   |
| 18q23    | 71,299,001  | 76,117,153  | 2  |        |         |         | chicken |         |         |     | no fs        |        |
| 19p12    | 19,801,000  | 26,701,000  | 2  | cat    | +       | chicken |         |         |         |     | no fs        |        |
| 19p13.1  | 12,599,001  | 19,801,000  | 11 | cat    | cattle  | mouse   | rat     | +       | chicken |     | fs           | rare   |
| 19p13.2  | 6,901,000   | 12,599,001  | 13 | mouse  | rat     | cattle  | +       | chicken |         |     | fs           | rare   |
| 19p13.3  | 1           | 6,901,000   | 10 | cattle | mouse   | rat     | +       | chicken |         |     | fs           | rare   |
| 19q12    | 30,199,001  | 37,101,000  | 6  | cattle | mouse   | rat     |         |         |         |     | no fs        |        |
| 19q13.1  | 37,101,000  | 43,399,001  | 1  |        |         |         | chicken |         |         |     | fs           | common |
| 19q13.2  | 43,399,001  | 48,101,000  | 1  |        |         |         | chicken |         |         |     | fs           | common |
| 19q13.3  | 48,101,000  | 55,999,001  | 5  | cat    | mouse   | rat     |         |         |         |     | fs           | common |
| 19q13.4  | 55,999,001  | 63,811,651  | 5  | mouse  | rat     | cat     |         |         |         |     | fs           | common |
| 1p13.1   | 114,899,001 | 117,501,000 | 1  |        |         |         | chicken |         |         |     | no fs        |        |
| 1p13.2   | 111,501,000 | 114,899,001 | 6  | dog    | +       | chicken |         |         |         |     | no fs        |        |
| 1p13.3   | 106,899,001 | 111,501,000 | 3  |        |         |         | chicken |         |         |     | no fs        |        |
| 1p21.1   | 101,999,001 | 106,899,001 | 2  |        |         |         | chicken |         |         |     | no fs        |        |
| 1p22.1   | 91,699,001  | 94,501,000  | 4  | mouse  | rat     |         |         |         |         |     | fs           | common |
| 1p22.2   | 88,101,000  | 91,699,001  | 4  | mouse  | rat     |         |         |         |         |     | fs           | common |
| 1p22.3   | 84,599,001  | 88,101,000  | 1  |        |         |         | pig     |         |         |     | fs           | common |
| 1p31.1   | 69,499,001  | 84,599,001  | 4  | pig    | +       | chicken |         |         |         |     | fs           | common |
| 1p31.2   | 65,499,001  | 69,499,001  | 7  | dog    | mouse   | rat     | +       | chicken |         |     | fs           | common |
| 1p32.3   | 50,399,001  | 55,801,000  | 2  |        |         |         | dog     |         |         |     | fs           | common |
| 1p32.2   | 55,801,000  | 58,701,000  | 4  | mouse  | rat     |         |         |         |         |     | fs           | common |
| 1p34.2   | 39,799,001  | 43,801,000  | 8  | dog    | pig     | +       | chicken |         |         |     | no fs        |        |
| 1p34.3   | 34,299,001  | 39,799,001  | 5  | cattle | chicken |         |         |         |         |     | no fs        |        |

|         |             |             |    |                                          |               |        |
|---------|-------------|-------------|----|------------------------------------------|---------------|--------|
| 1p35    | 27,699,001  | 34,299,001  | 8  | cattle rat dog + chicken                 | no fs         | common |
| 1p36.1  | 15,599,001  | 27,699,001  | 10 | rat cattle + chicken                     | fs            | common |
| 1p36.2  | 7,101,000   | 15,599,001  | 5  | cattle dog + chicken                     | fs            | common |
| 1p36.3  | 1           | 7,101,000   | 4  | cattle                                   | fs            | common |
| 1q21.3  | 148,099,001 | 151,401,000 | 2  | dog                                      | fs            | common |
| 1q23    | 153,399,001 | 162,301,000 | 7  | mouse rat cat + chicken                  | no fs         |        |
| 1q24    | 162,301,000 | 169,699,001 | 8  | cattle pig cat                           | no fs         |        |
| 1q25    | 169,699,001 | 182,501,000 | 3  | cattle pig                               | fs (1q25.1)   | common |
| 1q31    | 182,501,000 | 196,001,000 | 8  | cattle pig cat                           | fs            | common |
| 1q32.1  | 195,999,001 | 203,601,000 | 14 | cattle pig dog + chicken                 | no fs         |        |
| 1q32.2  | 203,601,000 | 207,799,001 | 10 | cattle pig dog mouse rat + chicken       | no fs         |        |
| 1q32.3  | 207,799,001 | 210,501,000 | 1  | pig                                      | no fs         |        |
| 1q41    | 210,501,000 | 219,799,001 | 2  | pig                                      | no fs         |        |
| 1q42.1  | 219,799,001 | 227,001,000 | 28 | cat cattle mouse pig rat + chicken       | fs            | common |
| 1q42.3  | 230,999,001 | 232,901,000 | 5  | mouse rat cattle                         | fs            | common |
| 1q43    | 232,899,001 | 239,501,000 | 12 | cattle mouse pig rat                     | no fs         |        |
| 1q44    | 239,501,000 | 245,522,847 | 8  | cattle dog                               | fs            | common |
| 20p11.2 | 17,799,001  | 25,701,000  | 5  | dog + chicken                            | fs (20p11.23) | rare   |
| 20p12   | 4,999,001   | 17,799,001  | 10 | cattle + chicken                         | fs (20p12.2)  | common |
| 20p13   | 1           | 4,999,001   | 10 | cattle mouse pig rat + chicken           | no fs         |        |
| 20q11.2 | 28,399,001  | 37,101,000  | 6  | dog + chicken                            | no fs         |        |
| 20q13.1 | 41,099,001  | 49,201,000  | 2  | chicken                                  | no fs         |        |
| 21q11   | 12,299,001  | 15,301,000  | 2  | dog                                      | no fs         |        |
| 21q22.1 | 30,499,001  | 38,601,000  | 2  | cattle                                   | no fs         |        |
| 21q22.3 | 41,399,001  | 46,944,323  | 8  | mouse rat + chicken                      | no fs         |        |
| 22q11.2 | 16,299,001  | 24,301,000  | 22 | cattle mouse pig dog + chicken           | no fs         |        |
| 22q12.1 | 24,301,000  | 27,901,000  | 5  | mouse rat + chicken                      | no fs         |        |
| 22q12.2 | 27,901,000  | 30,499,001  | 5  | cattle horse mouse pig + chicken         | fs            | common |
| 22q12.3 | 30,499,001  | 35,801,000  | 17 | cattle horse mouse rat cat dog + chicken | no fs         |        |
| 22q13.1 | 35,801,000  | 39,299,001  | 4  | cat cattle                               | fs            | common |
| 22q13.2 | 39,299,001  | 42,601,000  | 3  | cat + chicken                            | fs            | common |
| 22q13.3 | 42,601,000  | 49,554,710  | 4  | chicken                                  | fs            | common |
| 2p11.2  | 83,299,001  | 91,001,000  | 2  | cattle                                   | fs            | rare   |
| 2p12    | 74,999,001  | 83,301,000  | 6  | cattle + chicken                         | no fs         |        |

|        |             |             |    |                                    |             |        |
|--------|-------------|-------------|----|------------------------------------|-------------|--------|
| 2p13   | 68,501,000  | 74,999,001  | 27 | cattle mouse rat dog + chicken     | fs          | common |
| 2p14   | 63,999,001  | 68,501,000  | 1  | cattle                             | no fs       |        |
| 2p15   | 61,201,000  | 63,999,001  | 3  | cattle + chicken                   | no fs       |        |
| 2p16   | 47,699,001  | 61,201,000  | 8  | cattle mouse + chicken             | fs (2p16.2) | common |
| 2p21   | 41,701,000  | 47,699,001  | 4  | dog + chicken                      | no fs       |        |
| 2p22   | 31,999,001  | 41,701,000  | 10 | cat cattle rat + chicken           | no fs       |        |
| 2p23   | 23,999,001  | 31,999,001  | 13 | cattle mouse + chicken             | no fs       |        |
| 2p25.3 | 1           | 3,801,000   | 6  | mouse + chicken                    | no fs       |        |
| 2q11.2 | 95,799,001  | 102,601,000 | 2  | dog                                | fs          | rare   |
| 2q12   | 102,601,000 | 108,701,000 | 3  | mouse                              | no fs       |        |
| 2q13   | 108,701,000 | 113,901,000 | 14 | cattle dog mouse pig rat + chicken | fs          | rare   |
| 2q14.1 | 113,901,000 | 118,601,000 | 7  | cattle dog mouse pig rat + chicken | no fs       |        |
| 2q14.2 | 118,601,000 | 122,099,001 | 4  | pig + chicken                      | no fs       |        |
| 2q14.3 | 122,099,001 | 129,601,000 | 20 | mouse pig rat mouse + chicken      | no fs       |        |
| 2q21.1 | 129,599,001 | 132,301,000 | 8  | cattle dog mouse pig rat + chicken | no fs       |        |
| 2q21.2 | 132,301,000 | 134,899,001 | 7  | dog mouse pig rat + chicken        | no fs       |        |
| 2q21.3 | 134,899,001 | 137,401,000 | 1  | cattle                             | fs          | common |
| 2q22   | 137,401,000 | 148,501,000 | 4  | mouse rat                          | fs (2q22.3) | rare   |
| 2q23   | 148,501,000 | 154,701,000 | 4  | pig dog                            | no fs       |        |
| 2q24.2 | 159,699,001 | 163,601,000 | 2  | chicken                            | no fs       |        |
| 2q32.1 | 182,799,001 | 189,201,000 | 4  | mouse rat                          | fs          | common |
| 2q32.2 | 189,201,000 | 191,799,001 | 12 | cattle dog mouse                   | no fs       |        |
| 2q32.3 | 191,799,001 | 197,301,000 | 2  | mouse                              | no fs       |        |
| 2q33   | 197,301,000 | 208,901,000 | 1  | chicken                            | fs          | common |
| 2q34   | 208,901,000 | 215,199,001 | 1  | chicken                            | no fs       |        |
| 2q35   | 215,199,001 | 221,401,000 | 4  | chicken                            | no fs       |        |
| 2q36   | 221,401,000 | 230,799,001 | 5  | cattle dog + chicken               | no fs       |        |
| 2q37.1 | 230,799,001 | 235,401,000 | 6  | cattle + chicken                   | no fs       |        |
| 2q37.2 | 235,401,000 | 237,099,001 | 1  | chicken                            | no fs       |        |
| 2q37.3 | 237,099,001 | 243,018,229 | 6  | cattle + chicken                   | fs          | common |
| 3p12   | 74,199,001  | 87,201,000  | 13 | mouse pig rat dog + chicken        | no fs       |        |
| 3p14.1 | 63,699,001  | 69,901,000  | 4  | mouse rat                          | no fs       |        |
| 3p14.3 | 54,399,001  | 58,501,000  | 4  | mouse rat                          | no fs       |        |
| 3p21.2 | 51,399,001  | 52,301,000  | 6  | cat rat + chicken                  | no fs       |        |

|        |             |             |    |                                    |             |        |
|--------|-------------|-------------|----|------------------------------------|-------------|--------|
| 3p21.3 | 43,599,001  | 51,401,000  | 11 | cattle rat dog + chicken           | no fs       |        |
| 3p22   | 34,999,001  | 43,599,001  | 17 | cattle mouse rat + chicken         | no fs       |        |
| 3p23   | 32,199,001  | 34,999,001  | 4  | dog + chicken                      | no fs       |        |
| 3p24   | 16,399,001  | 32,199,001  | 11 | mouse rat cat                      | fs (3p24.2) | common |
| 3p25   | 1           | 16,399,001  | 25 | cattle dog mouse pig rat + chicken | no fs       |        |
| 3q11.2 | 93,199,001  | 99,201,000  | 2  | chicken                            | no fs       |        |
| 3q12   | 99,201,000  | 104,301,000 | 1  | chicken                            | no fs       |        |
| 3q13.2 | 112,799,001 | 115,001,000 | 2  | chicken                            | no fs       |        |
| 3q13.3 | 115,001,000 | 123,301,000 | 1  | chicken                            | no fs       |        |
| 3q21   | 123,301,000 | 132,701,000 | 29 | cattle chicken mouse pig rat       | no fs       |        |
| 3q22   | 132,701,000 | 140,399,001 | 10 | cattle pig + chicken               | no fs       |        |
| 3q23   | 140,399,001 | 144,401,000 | 2  | chicken                            | no fs       |        |
| 3q24   | 144,401,000 | 150,401,000 | 8  | mouse rat + chicken                | no fs       |        |
| 3q25.3 | 156,499,001 | 162,201,000 | 2  | dog                                | fs          | common |
| 3q26.1 | 162,201,000 | 169,301,000 | 3  | mouse rat                          | no fs       |        |
| 3q26.2 | 169,301,000 | 172,799,001 | 6  | mouse rat                          | no fs       |        |
| 3q26.3 | 172,799,001 | 184,201,000 | 10 | mouse rat dog                      | no fs       |        |
| 3q27   | 184,201,000 | 189,501,000 | 4  | mouse rat + chicken                | fs          | common |
| 3q29   | 193,999,001 | 199,505,740 | 10 | mouse rat dog + chicken            | no fs       |        |
| 4p12   | 45,799,001  | 48,901,000  | 1  | dog                                | no fs       |        |
| 4p13   | 41,099,001  | 45,801,000  | 2  | dog                                | no fs       |        |
| 4p15.3 | 10,999,001  | 22,701,000  | 4  | cattle dog                         | fs          | common |
| 4p16   | 1           | 10,999,001  | 30 | cattle mouse pig rat dog + chicken | fs (4p16.1) | common |
| 4q12   | 53,199,001  | 59,701,000  | 5  | pig dog + chicken                  | fs          | common |
| 4q13.3 | 70,599,001  | 76,601,000  | 2  | dog                                | no fs       |        |
| 4q21.1 | 76,601,000  | 79,201,000  | 4  | dog pig + chicken                  | no fs       |        |
| 4q21.2 | 79,201,000  | 87,301,000  | 5  | pig + chicken                      | no fs       |        |
| 4q22   | 88,399,001  | 99,201,000  | 13 | cattle mouse rat + chicken         | fs          | common |
| 4q26   | 114,399,001 | 121,101,000 | 3  | cattle mouse rat                   | no fs       |        |
| 4q27   | 121,101,000 | 124,299,001 | 9  | dog mouse rat cattle               | no fs       |        |
| 4q28   | 124,299,001 | 139,801,000 | 4  | chicken                            | no fs       |        |
| 4q31.1 | 139,801,000 | 141,801,000 | 4  | mouse rat                          | fs          | common |
| 4q31.2 | 141,801,000 | 151,999,001 | 6  | mouse rat dog                      | no fs       |        |
| 4q31.3 | 151,999,001 | 155,901,000 | 2  | chicken                            | no fs       |        |

|        |             |             |    |                                |       |        |
|--------|-------------|-------------|----|--------------------------------|-------|--------|
| 4q32   | 155,901,000 | 170,499,001 | 16 | cattle mouse pig rat dog       | no fs |        |
| 4q33   | 170,499,001 | 172,301,000 | 1  | chicken                        | no fs |        |
| 4q34   | 172,301,000 | 183,599,001 | 5  | pig dog + chicken              | no fs |        |
| 4q35   | 183,599,001 | 191,411,218 | 4  | pig + chicken                  | no fs |        |
| 5p12   | 42,399,001  | 45,801,000  | 3  | dog mouse                      | no fs |        |
| 5p15.1 | 15,099,001  | 18,501,000  | 2  | pig                            | no fs |        |
| 5p15.2 | 9,899,001   | 15,099,001  | 3  | dog pig                        | no fs |        |
| 5p15.3 | 1           | 9,899,001   | 9  | mouse pig rat + chicken        | no fs |        |
| 5q11.2 | 50,499,001  | 58,901,000  | 5  | cat dog + chicken              | no fs |        |
| 5q12   | 58,901,000  | 66,701,000  | 1  | pig                            | no fs |        |
| 5q13.1 | 66,701,000  | 68,401,000  | 1  | pig                            | no fs |        |
| 5q13.2 | 68,401,000  | 73,299,001  | 4  | cat pig + chicken              | no fs |        |
| 5q13.3 | 73,299,001  | 76,901,000  | 3  | cat pig + chicken              | no fs |        |
| 5q14   | 76,901,000  | 91,901,000  | 7  | cattle + chicken               | no fs |        |
| 5q15   | 91,901,000  | 97,301,000  | 6  | mouse rat + chicken            | fs    | common |
| 5q21   | 97,301,000  | 109,599,001 | 6  | mouse rat                      | fs    | common |
| 5q22   | 109,599,001 | 115,201,000 | 8  | mouse rat                      | no fs |        |
| 5q23.3 | 127,899,001 | 132,201,000 | 8  | cattle mouse rat + chicken     | no fs |        |
| 5q31.1 | 132,201,000 | 137,201,000 | 8  | mouse rat                      | fs    | common |
| 5q32   | 144,499,001 | 149,801,000 | 8  | cat cattle mouse rat           | no fs |        |
| 5q33.1 | 149,801,000 | 152,701,000 | 6  | mouse pig rat                  | no fs |        |
| 5q33.2 | 152,701,000 | 155,599,001 | 4  | mouse rat                      | no fs |        |
| 5q33.3 | 155,599,001 | 159,901,000 | 2  | chicken                        | no fs |        |
| 5q34   | 159,901,000 | 168,399,001 | 2  | cattle                         | no fs |        |
| 5q35.1 | 168,399,001 | 172,701,000 | 1  | mouse                          | fs    | rare   |
| 5q35.2 | 172,701,000 | 176,499,001 | 3  | rat mouse                      | fs    | rare   |
| 5q35.3 | 176,499,001 | 180,857,866 | 7  | mouse rat cattle dog           | fs    | rare   |
| 6p11.2 | 57,499,001  | 58,801,000  | 2  | dog + chicken                  | no fs |        |
| 6p12   | 46,299,001  | 57,499,001  | 15 | mouse pig rat + chicken        | no fs |        |
| 6p21.1 | 40,601,000  | 46,299,001  | 10 | chicken                        | no fs |        |
| 6p21.2 | 36,799,001  | 40,601,000  | 6  | mouse pig rat + chicken        | no fs |        |
| 6p21.3 | 29,999,001  | 36,799,001  | 11 | mouse pig cattle dog + chicken | no fs |        |
| 6p22.1 | 26,401,000  | 29,999,001  | 7  | cat dog mouse rat              | no fs |        |
| 6p22.2 | 24,099,001  | 26,401,000  | 3  | chicken                        | fs    | common |



|         |             |             |    |                                      |             |        |
|---------|-------------|-------------|----|--------------------------------------|-------------|--------|
| 6p22.3  | 15,299,001  | 24,099,001  | 5  | mouse rat + chicken                  | no fs       |        |
| 6q12    | 63,499,001  | 70,001,000  | 2  | dog pig                              | no fs       |        |
| 6q13    | 70,001,000  | 75,899,001  | 6  | mouse pig rat                        | fs          | common |
| 6q14    | 75,899,001  | 87,501,000  | 6  | mouse pig rat                        | no fs       |        |
| 6q15    | 87,501,000  | 92,099,001  | 1  | cat                                  | fs          | common |
| 6q16.1  | 92,099,001  | 98,701,000  | 1  | cat                                  | no fs       |        |
| 6q16.3  | 99,999,001  | 105,101,000 | 4  | mouse rat                            | no fs       |        |
| 6q22.1  | 114,499,001 | 118,401,000 | 8  | cattle mouse pig rat                 | no fs       |        |
| 6q22.3  | 118,599,001 | 130,401,000 | 10 | cattle dog mouse rat                 | no fs       |        |
| 6q23.2  | 131,399,001 | 135,201,000 | 8  | dog rat                              | no fs       |        |
| 6q24    | 139,099,001 | 149,101,000 | 2  | chicken                              | no fs       |        |
| 6q25.1  | 149,101,000 | 152,601,000 | 4  | mouse rat                            | no fs       |        |
| 6q25.2  | 152,601,000 | 155,599,001 | 2  | mouse                                | no fs       |        |
| 6q25.3  | 155,599,001 | 161,001,000 | 4  | mouse + chicken                      | no fs       |        |
| 6q27    | 164,499,001 | 170,975,699 | 4  | dog mouse                            | no fs       |        |
| 7p11.2  | 53,599,001  | 56,901,000  | 8  | cattle pig + chicken                 | fs          | rare   |
| 7p12    | 47,099,001  | 53,599,001  | 4  | mouse + chicken                      | no fs       |        |
| 7p13    | 43,101,000  | 47,099,001  | 6  | dog mouse                            | fs          | common |
| 7p14    | 30,299,001  | 43,101,000  | 12 | mouse rat + chicken                  | fs (7p14.2) | common |
| 7p15.2  | 25,299,001  | 27,701,000  | 1  | cattle                               | no fs       |        |
| 7p15.3  | 20,699,001  | 25,299,001  | 7  | mouse pig rat                        | no fs       |        |
| 7p21    | 6,999,001   | 20,701,000  | 10 | cattle mouse pig rat                 | no fs       |        |
| 7p22    | 1           | 6,999,001   | 8  | mouse pig rat + chicken              | fs          | common |
| 7q11.22 | 66,499,001  | 71,601,000  | 2  | dog pig rat + chicken                | fs          | common |
| 7q11.23 | 71,601,000  | 77,201,000  | 17 | pig                                  | fs          | common |
| 7q21.1  | 77,201,000  | 90,701,000  | 9  | cattle horse mouse pig rat + chicken | no fs       |        |
| 7q21.2  | 90,701,000  | 92,399,001  | 1  | mouse pig cattle + chicken           | fs          | common |
| 7q21.3  | 92,399,001  | 97,601,000  | 11 | mouse                                | no fs       |        |
| 7q22    | 97,601,000  | 106,901,000 | 22 | cattle mouse pig rat + chicken       | no fs       |        |
| 7q31.1  | 106,901,000 | 114,201,000 | 12 | cat cattle mouse pig rat + chicken   | fs          | common |
| 7q31.3  | 116,999,001 | 125,901,000 | 2  | mouse pig rat + chicken              | no fs       |        |
| 7q32    | 125,901,000 | 132,001,000 | 4  | dog                                  | no fs       |        |
| 7q33    | 132,001,000 | 137,099,001 | 10 | chicken                              | fs (7q32.3) | common |
| 7q34    | 137,099,001 | 143,001,000 | 6  | dog + chicken                        | no fs       |        |
|         |             |             |    | dog pig + chicken                    | no fs       |        |

|         |             |             |    |                                |       |             |
|---------|-------------|-------------|----|--------------------------------|-------|-------------|
| 7q35    | 143,001,000 | 147,299,001 | 2  | pig + chicken                  | no fs | common      |
| 7q36    | 147,299,001 | 158,628,139 | 14 | mouse pig rat dog + chicken    | fs    |             |
| 8p11.2  | 38,499,001  | 43,201,000  | 1  | pig                            | no fs |             |
| 8p12    | 38,499,001  | 38,499,001  | 17 | mouse pig rat cattle + chicken | no fs |             |
| 8p21.1  | 27,399,001  | 28,899,001  | 3  | cattle pig + chicken           | no fs |             |
| 8p21.2  | 23,401,000  | 27,399,001  | 2  | horse + chicken                | no fs |             |
| 8p21.3  | 19,099,001  | 23,401,000  | 8  | cattle mouse rat horse pig     | no fs |             |
| 8p22    | 12,699,001  | 19,099,001  | 16 | cattle mouse pig rat + chicken | no fs |             |
| 8p23.1  | 6,199,001   | 12,699,001  | 25 | dog mouse rat pig + chicken    | no fs |             |
| 8p23.3  | 1           | 2,201,000   | 3  | dog                            | no fs |             |
| 8q11.21 | 48,099,001  | 52,401,000  | 5  | cattle dog mouse               | no fs |             |
| 8q11.23 | 52,799,001  | 55,701,000  | 1  | cattle                         | no fs |             |
| 8q12    | 55,701,000  | 66,101,000  | 12 | cattle mouse rat               | no fs |             |
| 8q13    | 66,101,000  | 74,201,000  | 4  | mouse rat                      | no fs |             |
| 8q21.1  | 74,201,000  | 84,801,000  | 6  | cattle mouse rat               | no fs |             |
| 8q21.2  | 84,801,000  | 87,001,000  | 4  | mouse rat                      | no fs |             |
| 8q22.1  | 93,399,001  | 99,101,000  | 6  | mouse rat dog                  | fs    | common      |
| 8q22.3  | 101,599,001 | 106,201,000 | 2  | cattle                         | fs    | rare        |
| 8q23    | 106,201,000 | 117,701,000 | 1  | cattle                         | no fs |             |
| 8q24.1  | 117,701,000 | 127,301,000 | 7  | cattle + chicken               | fs    | common/rare |
| 9p13    | 33,199,001  | 41,401,000  | 3  | pig + chicken                  | no fs |             |
| 9p21    | 19,899,001  | 33,201,000  | 10 | cattle mouse pig rat + chicken | fs    | common/rare |
| 9p23    | 8,999,001   | 14,101,000  | 2  | chicken                        | no fs |             |
| 9p24    | 1           | 9,001,000   | 7  | mouse rat dog + chicken        | no fs |             |
| 9q21.2  | 76,399,001  | 78,301,000  | 4  | mouse rat                      | no fs |             |
| 9q21.3  | 78,301,000  | 87,601,000  | 16 | cattle mouse pig rat           | no fs |             |
| 9q22.1  | 87,601,000  | 89,001,000  | 5  | mouse pig rat                  | fs    | common      |
| 9q22.2  | 89,001,000  | 90,999,001  | 5  | mouse rat                      | no fs |             |
| 9q22.3  | 90,999,001  | 99,601,000  | 14 | mouse pig rat + chicken        | no fs |             |
| 9q31    | 99,601,000  | 112,001,000 | 10 | chicken                        | no fs |             |
| 9q32    | 112,001,000 | 114,801,000 | 4  | chicken                        | fs    | common/rare |
| 9q33    | 114,801,000 | 127,301,000 | 17 | mouse rat dog + chicken        | no fs |             |
| 9q34.1  | 127,301,000 | 133,001,000 | 13 | mouse rat + chicken            | no fs |             |
| 9q34.3  | 134,699,001 | 138,429,268 | 2  | chicken                        | no fs |             |

|         |             |             |   |                                  |       |
|---------|-------------|-------------|---|----------------------------------|-------|
| Xp11.22 | 49,499,001  | 54,501,000  | 3 | mouse rat                        | no fs |
| Xp11.23 | 47,199,001  | 49,499,001  | 3 | mouse rat                        | no fs |
| Xp11.3  | 42,099,001  | 47,199,001  | 6 | mouse rat + chicken              | no fs |
| Xp21.1  | 31,299,001  | 37,401,000  | 4 | mouse rat                        | no fs |
| Xp22.1  | 17,199,001  | 24,701,000  | 4 | mouse rat                        | no fs |
| Xq11    | 59,399,001  | 64,001,000  | 2 | dog                              | no fs |
| Xq13    | 67,499,001  | 75,801,000  | 2 | chicken                          | no fs |
| Xq21.1  | 75,801,000  | 84,401,000  | 7 | mouse + chicken                  | no fs |
| Xq21.3  | 86,099,001  | 98,201,000  | 4 | dog mouse                        | no fs |
| Xq22.1  | 98,201,000  | 102,401,000 | 1 | chicken                          | fs    |
| Xq22.2  | 102,401,000 | 103,499,001 | 1 | chicken                          | no fs |
| Xq22.3  | 103,499,001 | 108,501,000 | 3 | rat + chicken                    | no fs |
| Xq23    | 108,501,000 | 116,301,000 | 9 | cattle mouse horse rat + chicken | no fs |
| Xq24    | 116,301,000 | 120,599,001 | 2 | horse                            | no fs |
| Xq25    | 120,599,001 | 129,701,000 | 3 | rat + chicken                    | no fs |
| Xq26    | 129,701,000 | 137,699,001 | 2 | rat + chicken                    | no fs |
| Xq27    | 137,699,001 | 146,801,000 | 1 | chicken                          | fs    |

common/rare

common
