# Supplementary material for: Is mammalian chromosomal evolution driven by regions of genome fragility?
Source: PubMed Central journal article supplement (PMC1794428; doi:10.1186/gb-2006-7-12-r115), 2006-12-08
Supplement: gb-2006-7-12-r115-S7.pdf [file gb-2006-7-12-r115-S7.pdf]

**Table S4. Distribution of human fragile sites (classification based on [39]).**

The position of each chromosomal band in Mb based on the Ensemble data base [74] has been plotted to the human ideogram. The species in which the evolutionary breakpoints were identified are presented. An asterisk indicates fragile sites situated in bands comprising  $\geq 6000$ bp of tandem repeats in windows of 0.250 Mb. Two asterisks denote fragile sites in bands with  $\geq 10000$ bp of tandem repeats in windows of 0.250 Mb.

| Chromosomal band | Position (from) | Position (to) | Fragile site | Type   | Species                              |
|------------------|-----------------|---------------|--------------|--------|--------------------------------------|
| 10q11.2*         | 41.9Mb          | 52.6Mb        | FRA10G       | common | cattle mouse pig rat dog chicken     |
| 10q21*           | 52.6Mb          | 70.3Mb        | FRA10C       | common | cattle mouse rat chicken             |
| 10q22.1*         | 70.3Mb          | 74.6Mb        | FRA10D       | common | rat chicken                          |
| 10q23.3*         | 89.1Mb          | 97Mb          | FRA10A       | rare   | mouse pig rat chicken                |
| 10q25.2          | 111.8Mb         | 114.9Mb       | FRA10E       | common |                                      |
| 10q25.2          | 111.8Mb         | 114.9Mb       | FRA10B       | rare   |                                      |
| 10q26.1*         | 118.7Mb         | 127.4Mb       | FRA10F       | common | mouse rat chicken                    |
| 11p13            | 31Mb            | 36.4Mb        | FRA11E       | common | cat chicken                          |
| 11p14.2          | 26Mb            | 27.2Mb        | FRA11D       | common | cattle mouse rat                     |
| 11p15.1**        | 16.1Mb          | 21.6Mb        | FRA11C       | common | cattle mouse rat chicken             |
| 11p15.1**        | 16.1Mb          | 21.6Mb        | FRA11I       | rare   | cattle mouse rat chicken             |
| 11q13**          | 63.1Mb          | 77.4Mb        | FRA11H       | common | mouse cat cattle pig rat dog chicken |
| 11q13.3**        | 68.3Mb          | 70Mb          | FRA11A       | rare   | mouse cat cattle pig rat dog chicken |
| 11q14.2*         | 85.3Mb          | 87.8Mb        | FRA11F       | common |                                      |
| 11q23.3*         | 114.4Mb         | 121.2Mb       | FRA11G       | common |                                      |
| 11q23.3*         | 114.4Mb         | 121.2Mb       | FRA11B       | rare   |                                      |
| 12q13.1*         | 44.6Mb          | 53.1Mb        | FRA12A       | rare   | pig                                  |
| 12q21.3*         | 78.9Mb          | 91.2Mb        | FRA12B       | common |                                      |
| 12q24**          | 107.5Mb         | 132.5Mb       | FRA12E       | common | mouse rat pig dog chicken            |
| 12q24.13*        | 110.8Mb         | 112.8Mb       | FRA12D       | rare   | chicken                              |
| 12q24.2*         | 112.8Mb         | 119.3Mb       | FRA12C       | rare   |                                      |
| 13q13.2          | 32.9Mb          | 34.5Mb        | FRA13A       | common | mouse rat                            |
| 13q21**          | 54.2Mb          | 72.1Mb        | FRA13B       | common |                                      |
| 13q21.2*         | 58.5Mb          | 61.2Mb        | FRA13C       | common |                                      |
| 13q32            | 93.8Mb          | 100.5Mb       | FRA13D       | common |                                      |
| 14q23*           | 57.2Mb          | 67Mb          | FRA14B       | common | pig                                  |
| 14q24.1          | 67Mb            | 69.3Mb        | FRA14C       | common |                                      |
| 15q22*           | 57Mb            | 65.3Mb        | FRA15A       | common | cattle chicken                       |
| 16p12.1*         | 21.7Mb          | 27.6Mb        | FRA16E       | rare   | chicken                              |
| 16p13.11**       | 14.7Mb          | 16.7Mb        | FRA16A       | rare   | mouse rat chicken                    |
| 16q22.1*         | 63.9Mb          | 69.4Mb        | FRA16C       | common | cattle mouse pig rat chicken         |
| 16q22.1*         | 63.9Mb          | 69.4Mb        | FRA16B       | rare   | cattle mouse pig rat chicken         |
| 16q23.2*         | 78.5Mb          | 80.6Mb        | FRA16D       | common |                                      |
| 17p12            | 10.7Mb          | 15.9Mb        | FRA17A       | rare   | chicken                              |
| 17q23.1          | 50.9Mb          | 51.2Mb        | FRA17B       | common |                                      |
| 18q12.2          | 31Mb            | 35.5Mb        | FRA18A       | common | cattle chicken                       |
| 18q21.3*         | 52.5Mb          | 59.8Mb        | FRA18B       | common | mouse rat pig chicken                |
| 18q22.1          | 59.8Mb          | 64.9Mb        | FRA18C       | rare   | cattle chicken                       |
| 19p13**          | 1Mb             | 19.8Mb        | FRA19B       | rare   | cat cattle mouse rat chicken         |
| 19q13            | 37.1Mb          | 63.8Mb        | FRA19A       | common | mouse rat cat chicken                |
| 1p21.2           | 99.5Mb          | 102Mb         | FRA1E        | common |                                      |
| 1p21.3           | 94.49Mb         | 99.5Mb        | FRA1M        | rare   |                                      |
| 1p22             | 84.6Mb          | 94.5Mb        | FRA1D        | common | mouse rat pig                        |
| 1p31             | 60.1Mb          | 84.6Mb        | FRA1L        | common | pig dog mouse rat chicken            |

|          |           |           |        |        |                                    |
|----------|-----------|-----------|--------|--------|------------------------------------|
| 1p31.2   | 65.5Mb    | 69.5Mb    | FRA1C  | common | dog mouse rat chicken              |
| 1p32**   | 50.4Mb    | 60.1Mb    | FRA1B  | common | mouse rat dog                      |
| 1p36**   | 7.1Mb     | 27.7Mb    | FRA1A  | common | cattle rat dog chicken             |
| 1q12     | heterochr | heterochr | FRA1J  | common |                                    |
| 1q21**   | 141.6Mb   | 151.4Mb   | FRA1F  | common | dog                                |
| 1q25.1   | 169.7Mb   | 172.8Mb   | FRA1G  | common | cattle                             |
| 1q31     | 182.5Mb   | 196Mb     | FRA1K  | common | cattle pig cat                     |
| 1q42**   | 219.8Mb   | 233Mb     | FRA1H  | common | cat cattle mouse pig rat chicken   |
| 1q44**   | 239.5Mb   | 245.5Mb   | FRA1I  | common | cattle dog                         |
| 20p11.23 | 17.8Mb    | 21.2Mb    | FRA20A | rare   | chicken                            |
| 20p12.2  | 9Mb       | 11.9Mb    | FRA20B | common |                                    |
| 22q12.2* | 27.9Mb    | 30.5Mb    | FRA22B | common | cattle horse mouse pig chicken     |
| 22q13**  | 35.8Mb    | 49.5Mb    | FRA22A | rare   | cat cattle chicken                 |
| 2p11.2** | 83.3Mb    | 91Mb      | FRA2L  | rare   | cattle                             |
| 2p13**   | 68.5Mb    | 75Mb      | FRA2E  | common | cattle mouse rat dog chicken       |
| 2p16.2   | 52.8Mb    | 54.9Mb    | FRA2D  | common | cattle mouse chicken               |
| 2p24.2   | 16.7Mb    | 19.2Mb    | FRA2C  | common |                                    |
| 2q11.2*  | 95.8Mb    | 102.6Mb   | FRA2A  | rare   | dog                                |
| 2q13*    | 108.7Mb   | 113.9Mb   | FRA2B  | rare   | cattle mouse pig rat dog chicken   |
| 2q21.3   | 134.9Mb   | 137.4Mb   | FRA2F  | common | cattle                             |
| 2q22.3   | 144Mb     | 148.5Mb   | FRA2K  | rare   |                                    |
| 2q31*    | 169.6Mb   | 182.8Mb   | FRA2G  | common |                                    |
| 2q32.1*  | 182.8Mb   | 189.2Mb   | FRA2H  | common | mouse rat                          |
| 2q33*    | 197.3Mb   | 208.9Mb   | FRA2I  | common | chicken                            |
| 2q37.3** | 237.1Mb   | 243Mb     | FRA2J  | common | cattle chicken                     |
| 3p14.2   | 58.5Mb    | 63.7Mb    | FRA3B  | common |                                    |
| 3p24.2   | 23.8Mb    | 27.1Mb    | FRA3A  | common | mouse rat                          |
| 3q25     | 150.4Mb   | 162.2Mb   | FRA3D  | common | dog                                |
| 3q27*    | 184.2Mb   | 189.5Mb   | FRA3C  | common | mouse rat chicken                  |
| 4p15**   | 11Mb      | 35.6Mb    | FRA4D  | common | cattle dog                         |
| 4p16.1** | 5.9Mb     | 11Mb      | FRA4A  | common | cattle mouse pig rat dog           |
| 4q12     | 53.2Mb    | 59.7Mb    | FRA4B  | common | pig dog chicken                    |
| 4q22     | 88.4Mb    | 99.2Mb    | FRA4F  | common | cattle mouse rat chicken           |
| 4q31.1   | 139.8Mb   | 141.8Mb   | FRA4C  | common | mouse rat                          |
| 5p13*    | 29.3Mb    | 42.4Mb    | FRA5A  | common |                                    |
| 5p14**   | 18.5Mb    | 29.3Mb    | FRA5E  | common |                                    |
| 5q15     | 91.9Mb    | 97.3Mb    | FRA5D  | common | mouse rat chicken                  |
| 5q15     | 91.9Mb    | 97.3Mb    | FRA5B  | common | mouse rat chicken                  |
| 5q21**   | 97.3Mb    | 109.6Mb   | FRA5F  | common | mouse rat                          |
| 5q31.1** | 132.2Mb   | 137.2Mb   | FRA5C  | common | mouse rat                          |
| 5q35**   | 169.4Mb   | 180.9Mb   | FRA5G  | rare   | mouse rat cattle dog               |
| 6p22.2   | 24.1Mb    | 26.4Mb    | FRA6C  | common | chicken                            |
| 6p23*    | 13.5Mb    | 15.3Mb    | FRA6A  | rare   |                                    |
| 6p25.1*  | 4.1Mb     | 7Mb       | FRA6B  | common |                                    |
| 6q13*    | 70Mb      | 75.9Mb    | FRA6D  | common | mouse pig rat                      |
| 6q15     | 87.5Mb    | 92.1Mb    | FRA6G  | common | cat                                |
| 6q21*    | 105.1Mb   | 114.5Mb   | FRA6F  | common |                                    |
| 6q26**   | 161Mb     | 164.5Mb   | FRA6E  | common |                                    |
| 7p11.2*  | 53.6Mb    | 56.9Mb    | FRA7A  | rare   | cattle pig chicken                 |
| 7p13*    | 43.1Mb    | 47.1Mb    | FRA7D  | common | mouse rat chicken                  |
| 7p14.2   | 34.7Mb    | 37Mb      | FRA7C  | common | mouse pig rat                      |
| 7p22**   | 1Mb       | 7Mb       | FRA7B  | common | dog pig rat chicken                |
| 7q11**   | 58.9Mb    | 77.2Mb    | FRA7J  | common | cattle horse mouse pig rat chicken |
| 7q21.2   | 90.7Mb    | 92.4Mb    | FRA7E  | common | mouse                              |

|          |           |           |       |        |                                  |
|----------|-----------|-----------|-------|--------|----------------------------------|
| 7q22**   | 97.6Mb    | 106.9Mb   | FRA7F | common | cattle cat mouse pig rat chicken |
| 7q31.2   | 114.2Mb   | 117Mb     | FRA7G | common |                                  |
| 7q32.3   | 129.9Mb   | 132Mb     | FRA7H | common | chicken                          |
| 7q36**   | 147.3Mb   | 158.6Mb   | FRA7I | common | mouse rat pig dog chicken        |
| 8q22.1*  | 93.4Mb    | 99.1Mb    | FRA8B | common | mouse rat dog                    |
| 8q22.3   | 101.6Mb   | 106.2Mb   | FRA8A | rare   | cattle                           |
| 8q24.1   | 117.7Mb   | 127.3Mb   | FRA8C | common | cattle chicken                   |
| 8q24.1   | 117.7Mb   | 127.3Mb   | FRA8E | rare   | cattle chicken                   |
| 8q24.3** | 140Mb     | 146.3Mb   | FRA8D | common |                                  |
| 9p21     | 19.9Mb    | 33.2Mb    | FRA9C | common | cattle mouse pig rat chicken     |
| 9p21     | 19.9Mb    | 33.2Mb    | FRA9A | rare   | cattle mouse pig rat chicken     |
| 9q12**   | heterochr | heterochr | FRA9F | common |                                  |
| 9q22.1   | 87.6Mb    | 89Mb      | FRA9D | common | mouse pig rat                    |
| 9q32*    | 112Mb     | 114.8Mb   | FRA9E | common | chicken                          |
| 9q32*    | 112Mb     | 114.8Mb   | FRA9B | rare   | chicken                          |
| Xp22.31  | 5.8Mb     | 9.3Mb     | FRAXB | common |                                  |
| Xq22.1   | 98.2Mb    | 102.4Mb   | FRAXC | common | chicken                          |
| Xq27.2   | 140Mb     | 141.8Mb   | FRAXD | common |                                  |
| Xq27.3   | 141.8Mb   | 146.8Mb   | FRAXA | rare   |                                  |
| Xq28     | 146.8Mb   | 154.8Mb   | FRAXE | rare   |                                  |
| Xq28     | 146.8Mb   | 154.8Mb   | FRAXF | rare   |                                  |
