# Supplementary material for: Is mammalian chromosomal evolution driven by regions of genome fragility?
Source: PubMed Central journal article supplement (PMC1794428; doi:10.1186/gb-2006-7-12-r115), 2006-12-08
Supplement: gb-2006-7-12-r115-S8.pdf [file gb-2006-7-12-r115-S8.pdf]

**Table S5:** List of common human fragile sites analysed at the molecular level, indicating their position defined by markers or BAC clones and their content of evolutionary breakpoints (EB).

| human cFS | clones or markers  | reference               | spanning region (Mb) | spanning EB | surrounding EB (Mb) | species                     |
|-----------|--------------------|-------------------------|----------------------|-------------|---------------------|-----------------------------|
| FRA 1E    | 526F14-145D11      | Hormozian et al. 2006   | 97,6-98,1            | no          |                     |                             |
| FRA 2G    | 285F23-724O16      | Limongi et al. 2003     | 169,3-170,3          | no          |                     |                             |
| FRA 3B    | SHGC84349-RH16786  | Wilke et al. 1996       | 59,6-63,8            | no          | yes (1Mb)           | rat, mouse                  |
| FRA 4F    | 549C16-145G20      | Rozier et al. 2004      | 90,56-97,6           | yes         |                     |                             |
| FRA 6E    | D6S1581-D6S1719    | Denison et al. 2003     | 160-165,9            | yes         |                     | cattle, mouse, rat, chicken |
| FRA 6F    | RH124087-SHGC82095 | Morelli et al. 2002     | 111,5-112,6          | no          |                     | mouse, chicken              |
| FRA 9E    | D9S1832-D9S177     | Callahan et al. 2003    | 106-115,5            | yes         |                     | chicken                     |
| FRA 7E    | D7S2443-D7S524     | Zlotorynski et al. 2003 | 79-84,5              | yes         |                     | chicken                     |
| FRA 7H    | D7S788-D7S649      | Mishmar et al. 1998     | 129,86-130,3         | yes         |                     | chicken                     |
| FRA 7G    | AC003080-AC002465  | Hellman et al. 2002     | 110,2-116,7          | yes         |                     | rat, mouse, dog             |
| FRA 13A   | RP1166B8-RP1198D3  | Savelyeva et al. 2006   | 34,4-35,2            | no          |                     |                             |
| FRA 16D   | D16S518-D16S3029   | Krummel et al. 2000     | 76,7-77,5            | no          | yes (1Mb)           | chicken                     |
| FRA XB    | n.a.               | Arlt et al. 2002        | n.a.                 | n.a.        | n.a.                | n.a.                        |
