# Supplementary material for: Is mammalian chromosomal evolution driven by regions of genome fragility?
Source: PubMed Central journal article supplement (PMC1794428; doi:10.1186/gb-2006-7-12-r115), 2006-12-08
Supplement: gb-2006-7-12-r115-S9.pdf [file gb-2006-7-12-r115-S9.pdf]

**Table S6:** The human genome divided into windows of 0.250Mb.

| chr   | band type | chromosomal band | n° species with EB | position (nt) | n° bases repeated | fs | type of fs |
|-------|-----------|------------------|--------------------|---------------|-------------------|----|------------|
| chr01 | T         | 1p36.3           | 1                  | 125000        | 6204              | fs | fs common  |
| chr01 | T         | 1p36.3           | 1                  | 375000        | 8902              | fs | fs common  |
| chr01 | T         | 1p36.3           | 1                  | 625000        | 8829              | fs | fs common  |
| chr01 | T         | 1p36.3           | 1                  | 875000        | 22007             | fs | fs common  |
| chr01 | T         | 1p36.3           | 1                  | 1125000       | 27027             | fs | fs common  |
| chr01 | T         | 1p36.3           | 1                  | 1375000       | 13386             | fs | fs common  |
| chr01 | T         | 1p36.3           | 1                  | 1625000       | 7267              | fs | fs common  |
| chr01 | T         | 1p36.3           | 1                  | 1875000       | 12515             | fs | fs common  |
| chr01 | T         | 1p36.3           | 1                  | 2125000       | 17014             | fs | fs common  |
| chr01 | T         | 1p36.3           | 1                  | 2375000       | 9450              | fs | fs common  |
| chr01 | T         | 1p36.3           | 1                  | 2625000       | 59087             | fs | fs common  |
| chr01 | T         | 1p36.3           | 1                  | 2875000       | 18004             | fs | fs common  |
| chr01 | T         | 1p36.3           | 1                  | 3125000       | 15241             | fs | fs common  |
| chr01 | E         | 1p36.3           | 1                  | 3375000       | 12208             | fs | fs common  |
| chr01 | E         | 1p36.3           | 1                  | 3625000       | 17202             | fs | fs common  |
| chr01 | E         | 1p36.3           | 1                  | 3875000       | 9935              | fs | fs common  |
| chr01 | E         | 1p36.3           | 1                  | 4125000       | 10145             | fs | fs common  |
| chr01 | E         | 1p36.3           | 1                  | 4375000       | 9834              | fs | fs common  |
| chr01 | E         | 1p36.3           | 1                  | 4625000       | 8246              | fs | fs common  |
| chr01 | E         | 1p36.3           | 1                  | 4875000       | 3199              | fs | fs common  |
| chr01 | E         | 1p36.3           | 1                  | 5125000       | 5209              | fs | fs common  |
| chr01 | E         | 1p36.3           | 1                  | 5375000       | 7123              | fs | fs common  |
| chr01 | E         | 1p36.3           | 1                  | 5625000       | 9219              | fs | fs common  |
| chr01 | E         | 1p36.3           | 1                  | 5875000       | 11121             | fs | fs common  |
| chr01 | E         | 1p36.3           | 1                  | 6125000       | 12661             | fs | fs common  |
| chr01 | E         | 1p36.3           | 1                  | 6375000       | 8817              | fs | fs common  |
| chr01 | E         | 1p36.3           | 1                  | 6625000       | 6396              | fs | fs common  |
| chr01 | E         | 1p36.3           | 1                  | 6875000       | 4412              | fs | fs common  |
| chr01 | E         | 1p36.3           | 1                  | 7125000       | 5791              | fs | fs common  |
| chr01 | E         | 1p36.2           | 3                  | 7375000       | 8160              | fs | fs common  |
| chr01 | E         | 1p36.2           | 3                  | 7625000       | 9930              | fs | fs common  |

|       |   |        |   |          |      |    |           |
|-------|---|--------|---|----------|------|----|-----------|
| chr01 | E | 1p36.2 | 3 | 7875000  | 5794 | fs | fs common |
| chr01 | E | 1p36.2 | 3 | 8125000  | 4496 | fs | fs common |
| chr01 | E | 1p36.2 | 3 | 8375000  | 6843 | fs | fs common |
| chr01 | E | 1p36.2 | 3 | 8625000  | 3666 | fs | fs common |
| chr01 | E | 1p36.2 | 3 | 8875000  | 4215 | fs | fs common |
| chr01 | E | 1p36.2 | 3 | 9125000  | 7485 | fs | fs common |
| chr01 | E | 1p36.2 | 3 | 9375000  | 6006 | fs | fs common |
| chr01 | E | 1p36.2 | 3 | 9625000  | 4530 | fs | fs common |
| chr01 | E | 1p36.2 | 3 | 9875000  | 6711 | fs | fs common |
| chr01 | E | 1p36.2 | 3 | 10125000 | 8368 | fs | fs common |
| chr01 | E | 1p36.2 | 3 | 10375000 | 3266 | fs | fs common |
| chr01 | E | 1p36.2 | 3 | 10625000 | 5174 | fs | fs common |
| chr01 | E | 1p36.2 | 3 | 10875000 | 4759 | fs | fs common |
| chr01 | E | 1p36.2 | 3 | 11125000 | 5921 | fs | fs common |
| chr01 | E | 1p36.2 | 3 | 11375000 | 6994 | fs | fs common |
| chr01 | E | 1p36.2 | 3 | 11625000 | 4419 | fs | fs common |
| chr01 | E | 1p36.2 | 3 | 11875000 | 4724 | fs | fs common |
| chr01 | E | 1p36.2 | 3 | 12125000 | 7581 | fs | fs common |
| chr01 | E | 1p36.2 | 3 | 12375000 | 3245 | fs | fs common |
| chr01 | E | 1p36.2 | 3 | 12625000 | 4805 | fs | fs common |
| chr01 | E | 1p36.2 | 3 | 12875000 | 3887 | fs | fs common |
| chr01 | E | 1p36.2 | 3 | 13125000 | 5139 | fs | fs common |
| chr01 | E | 1p36.2 | 3 | 13375000 | 5607 | fs | fs common |
| chr01 | E | 1p36.2 | 3 | 13625000 | 5822 | fs | fs common |
| chr01 | E | 1p36.2 | 3 | 13875000 | 957  | fs | fs common |
| chr01 | E | 1p36.2 | 3 | 14125000 | 2817 | fs | fs common |
| chr01 | E | 1p36.2 | 3 | 14375000 | 2196 | fs | fs common |
| chr01 | E | 1p36.2 | 3 | 14625000 | 3281 | fs | fs common |
| chr01 | E | 1p36.2 | 3 | 14875000 | 3988 | fs | fs common |
| chr01 | E | 1p36.2 | 3 | 15125000 | 4815 | fs | fs common |
| chr01 | E | 1p36.2 | 3 | 15375000 | 3289 | fs | fs common |
| chr01 | E | 1p36.2 | 3 | 15625000 | 4928 | fs | fs common |
| chr01 | E | 1p36.1 | 3 | 15875000 | 4948 | fs | fs common |
| chr01 | E | 1p36.1 | 3 | 16125000 | 4264 | fs | fs common |
| chr01 | E | 1p36.1 | 3 | 16375000 | 4675 | fs | fs common |
| chr01 | E | 1p36.1 | 3 | 16625000 | 2918 | fs | fs common |

|       |   |        |   |          |      |    |           |
|-------|---|--------|---|----------|------|----|-----------|
| chr01 | E | 1p36.1 | 3 | 16875000 | 2245 | fs | fs common |
| chr01 | E | 1p36.1 | 3 | 17125000 | 2858 | fs | fs common |
| chr01 | E | 1p36.1 | 3 | 17375000 | 4708 | fs | fs common |
| chr01 | E | 1p36.1 | 3 | 17625000 | 5944 | fs | fs common |
| chr01 | E | 1p36.1 | 3 | 17875000 | 4264 | fs | fs common |
| chr01 | E | 1p36.1 | 3 | 18125000 | 5601 | fs | fs common |
| chr01 | E | 1p36.1 | 3 | 18375000 | 4924 | fs | fs common |
| chr01 | E | 1p36.1 | 3 | 18625000 | 4427 | fs | fs common |
| chr01 | E | 1p36.1 | 3 | 18875000 | 5177 | fs | fs common |
| chr01 | E | 1p36.1 | 3 | 19125000 | 3904 | fs | fs common |
| chr01 | E | 1p36.1 | 3 | 19375000 | 1938 | fs | fs common |
| chr01 | E | 1p36.1 | 3 | 19625000 | 2861 | fs | fs common |
| chr01 | E | 1p36.1 | 3 | 19875000 | 3575 | fs | fs common |
| chr01 | E | 1p36.1 | 3 | 20125000 | 2431 | fs | fs common |
| chr01 | E | 1p36.1 | 3 | 20375000 | 3619 | fs | fs common |
| chr01 | E | 1p36.1 | 3 | 20625000 | 3953 | fs | fs common |
| chr01 | E | 1p36.1 | 3 | 20875000 | 5773 | fs | fs common |
| chr01 | E | 1p36.1 | 3 | 21125000 | 4104 | fs | fs common |
| chr01 | E | 1p36.1 | 3 | 21375000 | 6183 | fs | fs common |
| chr01 | E | 1p36.1 | 3 | 21625000 | 4339 | fs | fs common |
| chr01 | E | 1p36.1 | 3 | 21875000 | 3341 | fs | fs common |
| chr01 | E | 1p36.1 | 3 | 22125000 | 2797 | fs | fs common |
| chr01 | E | 1p36.1 | 3 | 22375000 | 7077 | fs | fs common |
| chr01 | E | 1p36.1 | 3 | 22625000 | 6944 | fs | fs common |
| chr01 | E | 1p36.1 | 3 | 22875000 | 4289 | fs | fs common |
| chr01 | E | 1p36.1 | 3 | 23125000 | 2641 | fs | fs common |
| chr01 | E | 1p36.1 | 3 | 23375000 | 5069 | fs | fs common |
| chr01 | E | 1p36.1 | 3 | 23625000 | 5171 | fs | fs common |
| chr01 | E | 1p36.1 | 3 | 23875000 | 8283 | fs | fs common |
| chr01 | E | 1p36.1 | 3 | 24125000 | 6605 | fs | fs common |
| chr01 | E | 1p36.1 | 3 | 24375000 | 4117 | fs | fs common |
| chr01 | E | 1p36.1 | 3 | 24625000 | 4432 | fs | fs common |
| chr01 | E | 1p36.1 | 3 | 24875000 | 7963 | fs | fs common |
| chr01 | E | 1p36.1 | 3 | 25125000 | 5305 | fs | fs common |
| chr01 | E | 1p36.1 | 3 | 25375000 | 3045 | fs | fs common |
| chr01 | E | 1p36.1 | 3 | 25625000 | 3190 | fs | fs common |

|       |   |        |   |          |      |      |           |
|-------|---|--------|---|----------|------|------|-----------|
| chr01 | E | 1p36.1 | 3 | 25875000 | 4911 | fs   | fs common |
| chr01 | E | 1p36.1 | 3 | 26125000 | 2983 | fs   | fs common |
| chr01 | E | 1p36.1 | 3 | 26375000 | 4873 | fs   | fs common |
| chr01 | E | 1p36.1 | 3 | 26625000 | 6812 | fs   | fs common |
| chr01 | E | 1p36.1 | 3 | 26875000 | 6189 | fs   | fs common |
| chr01 | E | 1p36.1 | 3 | 27125000 | 6924 | fs   | fs common |
| chr01 | E | 1p36.1 | 3 | 27375000 | 6175 | fs   | fs common |
| chr01 | E | 1p36.1 | 3 | 27625000 | 5512 | fs   | fs common |
| chr01 | E | 1p35   | 4 | 27875000 | 6345 | nofs | nofs      |
| chr01 | E | 1p35   | 4 | 28125000 | 3150 | nofs | nofs      |
| chr01 | E | 1p35   | 4 | 28375000 | 3994 | nofs | nofs      |
| chr01 | E | 1p35   | 4 | 28625000 | 3642 | nofs | nofs      |
| chr01 | E | 1p35   | 4 | 28875000 | 5686 | nofs | nofs      |
| chr01 | E | 1p35   | 4 | 29125000 | 3485 | nofs | nofs      |
| chr01 | E | 1p35   | 4 | 29375000 | 4903 | nofs | nofs      |
| chr01 | E | 1p35   | 4 | 29625000 | 2379 | nofs | nofs      |
| chr01 | E | 1p35   | 4 | 29875000 | 6708 | nofs | nofs      |
| chr01 | E | 1p35   | 4 | 30125000 | 4414 | nofs | nofs      |
| chr01 | E | 1p35   | 4 | 30375000 | 4132 | nofs | nofs      |
| chr01 | E | 1p35   | 4 | 30625000 | 7122 | nofs | nofs      |
| chr01 | E | 1p35   | 4 | 30875000 | 6415 | nofs | nofs      |
| chr01 | E | 1p35   | 4 | 31125000 | 4374 | nofs | nofs      |
| chr01 | E | 1p35   | 4 | 31375000 | 6225 | nofs | nofs      |
| chr01 | E | 1p35   | 4 | 31625000 | 6720 | nofs | nofs      |
| chr01 | E | 1p35   | 4 | 31875000 | 1847 | nofs | nofs      |
| chr01 | E | 1p35   | 4 | 32125000 | 4067 | nofs | nofs      |
| chr01 | E | 1p35   | 4 | 32375000 | 6031 | nofs | nofs      |
| chr01 | E | 1p35   | 4 | 32625000 | 3724 | nofs | nofs      |
| chr01 | E | 1p35   | 4 | 32875000 | 4978 | nofs | nofs      |
| chr01 | E | 1p35   | 4 | 33125000 | 6884 | nofs | nofs      |
| chr01 | E | 1p35   | 4 | 33375000 | 3830 | nofs | nofs      |
| chr01 | E | 1p35   | 4 | 33625000 | 2673 | nofs | nofs      |
| chr01 | E | 1p35   | 4 | 33875000 | 2142 | nofs | nofs      |
| chr01 | E | 1p35   | 4 | 34125000 | 3811 | nofs | nofs      |
| chr01 | E | 1p35   | 4 | 34375000 | 3376 | nofs | nofs      |
| chr01 | E | 1p34.3 | 2 | 34625000 | 2021 | nofs | nofs      |

|       |   |        |   |          |      |      |      |
|-------|---|--------|---|----------|------|------|------|
| chr01 | E | 1p34.3 | 2 | 34875000 | 2613 | nofs | nofs |
| chr01 | E | 1p34.3 | 2 | 35125000 | 4513 | nofs | nofs |
| chr01 | E | 1p34.3 | 2 | 35375000 | 5718 | nofs | nofs |
| chr01 | E | 1p34.3 | 2 | 35625000 | 2675 | nofs | nofs |
| chr01 | E | 1p34.3 | 2 | 35875000 | 4857 | nofs | nofs |
| chr01 | E | 1p34.3 | 2 | 36125000 | 2995 | nofs | nofs |
| chr01 | E | 1p34.3 | 2 | 36375000 | 5573 | nofs | nofs |
| chr01 | E | 1p34.3 | 2 | 36625000 | 6770 | nofs | nofs |
| chr01 | E | 1p34.3 | 2 | 36875000 | 4143 | nofs | nofs |
| chr01 | E | 1p34.3 | 2 | 37125000 | 6751 | nofs | nofs |
| chr01 | E | 1p34.3 | 2 | 37375000 | 2981 | nofs | nofs |
| chr01 | E | 1p34.3 | 2 | 37625000 | 4905 | nofs | nofs |
| chr01 | E | 1p34.3 | 2 | 37875000 | 2108 | nofs | nofs |
| chr01 | E | 1p34.3 | 2 | 38125000 | 6061 | nofs | nofs |
| chr01 | E | 1p34.3 | 2 | 38375000 | 2566 | nofs | nofs |
| chr01 | E | 1p34.3 | 2 | 38625000 | 2729 | nofs | nofs |
| chr01 | E | 1p34.3 | 2 | 38875000 | 2623 | nofs | nofs |
| chr01 | E | 1p34.3 | 2 | 39125000 | 5945 | nofs | nofs |
| chr01 | E | 1p34.3 | 2 | 39375000 | 5183 | nofs | nofs |
| chr01 | E | 1p34.3 | 2 | 39625000 | 4249 | nofs | nofs |
| chr01 | E | 1p34.3 | 2 | 39875000 | 2704 | nofs | nofs |
| chr01 | E | 1p34.2 | 3 | 40125000 | 4683 | nofs | nofs |
| chr01 | E | 1p34.2 | 3 | 40375000 | 3133 | nofs | nofs |
| chr01 | E | 1p34.2 | 3 | 40625000 | 4500 | nofs | nofs |
| chr01 | E | 1p34.2 | 3 | 40875000 | 1668 | nofs | nofs |
| chr01 | E | 1p34.2 | 3 | 41125000 | 2117 | nofs | nofs |
| chr01 | E | 1p34.2 | 3 | 41375000 | 2364 | nofs | nofs |
| chr01 | E | 1p34.2 | 3 | 41625000 | 6952 | nofs | nofs |
| chr01 | E | 1p34.2 | 3 | 41875000 | 2425 | nofs | nofs |
| chr01 | E | 1p34.2 | 3 | 42125000 | 2204 | nofs | nofs |
| chr01 | E | 1p34.2 | 3 | 42375000 | 3900 | nofs | nofs |
| chr01 | E | 1p34.2 | 3 | 42625000 | 3226 | nofs | nofs |
| chr01 | E | 1p34.2 | 3 | 42875000 | 3046 | nofs | nofs |
| chr01 | E | 1p34.2 | 3 | 43125000 | 3392 | nofs | nofs |
| chr01 | E | 1p34.2 | 3 | 43375000 | 2523 | nofs | nofs |
| chr01 | E | 1p34.2 | 3 | 43625000 | 2770 | nofs | nofs |

|       |   |        |   |          |      |      |           |
|-------|---|--------|---|----------|------|------|-----------|
| chr01 | E | 1p34.2 | 3 | 43875000 | 3681 | nofs | nofs      |
| chr01 | B | 1p34.1 | . | 44125000 | 5433 | nofs | nofs      |
| chr01 | B | 1p34.1 | . | 44375000 | 4576 | nofs | nofs      |
| chr01 | B | 1p34.1 | . | 44625000 | 4213 | nofs | nofs      |
| chr01 | B | 1p34.1 | . | 44875000 | 7630 | nofs | nofs      |
| chr01 | B | 1p34.1 | . | 45125000 | 6542 | nofs | nofs      |
| chr01 | B | 1p34.1 | . | 45375000 | 5308 | nofs | nofs      |
| chr01 | B | 1p34.1 | . | 45625000 | 6289 | nofs | nofs      |
| chr01 | B | 1p34.1 | . | 45875000 | 5454 | nofs | nofs      |
| chr01 | B | 1p34.1 | . | 46125000 | 2500 | nofs | nofs      |
| chr01 | B | 1p34.1 | . | 46375000 | 3726 | nofs | nofs      |
| chr01 | B | 1p34.1 | . | 46625000 | 3556 | nofs | nofs      |
| chr01 | B | 1p33   | . | 46875000 | 2567 | nofs | nofs      |
| chr01 | B | 1p33   | . | 47125000 | 1374 | nofs | nofs      |
| chr01 | B | 1p33   | . | 47375000 | 3279 | nofs | nofs      |
| chr01 | B | 1p33   | . | 47625000 | 3009 | nofs | nofs      |
| chr01 | B | 1p33   | . | 47875000 | 2845 | nofs | nofs      |
| chr01 | B | 1p33   | . | 48125000 | 2945 | nofs | nofs      |
| chr01 | B | 1p33   | . | 48375000 | 3517 | nofs | nofs      |
| chr01 | B | 1p33   | . | 48625000 | 5547 | nofs | nofs      |
| chr01 | B | 1p33   | . | 48875000 | 2103 | nofs | nofs      |
| chr01 | B | 1p33   | . | 49125000 | 1687 | nofs | nofs      |
| chr01 | B | 1p33   | . | 49375000 | 2127 | nofs | nofs      |
| chr01 | B | 1p33   | . | 49625000 | 3041 | nofs | nofs      |
| chr01 | B | 1p33   | . | 49875000 | 1476 | nofs | nofs      |
| chr01 | B | 1p33   | . | 50125000 | 2878 | nofs | nofs      |
| chr01 | E | 1p32.3 | 1 | 50375000 | 2597 | fs   | fs common |
| chr01 | E | 1p32.3 | 1 | 50625000 | 3776 | fs   | fs common |
| chr01 | E | 1p32.3 | 1 | 50875000 | 2868 | fs   | fs common |
| chr01 | E | 1p32.3 | 1 | 51125000 | 4276 | fs   | fs common |
| chr01 | E | 1p32.3 | 1 | 51375000 | 2248 | fs   | fs common |
| chr01 | E | 1p32.3 | 1 | 51625000 | 2774 | fs   | fs common |
| chr01 | E | 1p32.3 | 1 | 51875000 | 3944 | fs   | fs common |
| chr01 | E | 1p32.3 | 1 | 52125000 | 2661 | fs   | fs common |
| chr01 | E | 1p32.3 | 1 | 52375000 | 3721 | fs   | fs common |
| chr01 | E | 1p32.3 | 1 | 52625000 | 3611 | fs   | fs common |

|       |   |        |   |          |       |    |           |
|-------|---|--------|---|----------|-------|----|-----------|
| chr01 | E | 1p32.3 | 1 | 52875000 | 6137  | fs | fs common |
| chr01 | E | 1p32.3 | 1 | 53125000 | 3880  | fs | fs common |
| chr01 | E | 1p32.3 | 1 | 53375000 | 10284 | fs | fs common |
| chr01 | E | 1p32.3 | 1 | 53625000 | 5201  | fs | fs common |
| chr01 | E | 1p32.3 | 1 | 53875000 | 3721  | fs | fs common |
| chr01 | E | 1p32.3 | 1 | 54125000 | 2251  | fs | fs common |
| chr01 | E | 1p32.3 | 1 | 54375000 | 3391  | fs | fs common |
| chr01 | E | 1p32.3 | 1 | 54625000 | 6437  | fs | fs common |
| chr01 | E | 1p32.3 | 1 | 54875000 | 3196  | fs | fs common |
| chr01 | E | 1p32.3 | 1 | 55125000 | 2825  | fs | fs common |
| chr01 | E | 1p32.3 | 1 | 55375000 | 1603  | fs | fs common |
| chr01 | E | 1p32.3 | 1 | 55625000 | 1907  | fs | fs common |
| chr01 | E | 1p32.3 | 1 | 55875000 | 6625  | fs | fs common |
| chr01 | E | 1p32.3 | 1 | 56125000 | 1381  | fs | fs common |
| chr01 | E | 1p32.2 | 2 | 56375000 | 1746  | fs | fs common |
| chr01 | E | 1p32.2 | 2 | 56625000 | 2505  | fs | fs common |
| chr01 | E | 1p32.2 | 2 | 56875000 | 2692  | fs | fs common |
| chr01 | E | 1p32.2 | 2 | 57125000 | 1940  | fs | fs common |
| chr01 | E | 1p32.2 | 2 | 57375000 | 2499  | fs | fs common |
| chr01 | E | 1p32.2 | 2 | 57625000 | 2602  | fs | fs common |
| chr01 | E | 1p32.2 | 2 | 57875000 | 3451  | fs | fs common |
| chr01 | E | 1p32.2 | 2 | 58125000 | 1883  | fs | fs common |
| chr01 | E | 1p32.2 | 2 | 58375000 | 2976  | fs | fs common |
| chr01 | E | 1p32.2 | 2 | 58625000 | 1774  | fs | fs common |
| chr01 | B | 1p32.1 | . | 58875000 | 3961  | fs | fs common |
| chr01 | B | 1p32.1 | . | 59125000 | 2314  | fs | fs common |
| chr01 | B | 1p32.1 | . | 59375000 | 2245  | fs | fs common |
| chr01 | B | 1p32.1 | . | 59625000 | 2132  | fs | fs common |
| chr01 | B | 1p32.1 | . | 59875000 | 1372  | fs | fs common |
| chr01 | B | 1p32.1 | . | 60125000 | 3242  | fs | fs common |
| chr01 | B | 1p31.3 | . | 60375000 | 3072  | fs | fs common |
| chr01 | B | 1p31.3 | . | 60625000 | 1576  | fs | fs common |
| chr01 | B | 1p31.3 | . | 60875000 | 2207  | fs | fs common |
| chr01 | B | 1p31.3 | . | 61125000 | 2233  | fs | fs common |
| chr01 | B | 1p31.3 | . | 61375000 | 1833  | fs | fs common |
| chr01 | B | 1p31.3 | . | 61625000 | 3014  | fs | fs common |

|       |   |        |   |          |      |    |           |
|-------|---|--------|---|----------|------|----|-----------|
| chr01 | B | 1p31.3 | . | 61875000 | 3495 | fs | fs common |
| chr01 | B | 1p31.3 | . | 62125000 | 1875 | fs | fs common |
| chr01 | B | 1p31.3 | . | 62375000 | 4450 | fs | fs common |
| chr01 | B | 1p31.3 | . | 62625000 | 4198 | fs | fs common |
| chr01 | B | 1p31.3 | . | 62875000 | 3190 | fs | fs common |
| chr01 | B | 1p31.3 | . | 63125000 | 2109 | fs | fs common |
| chr01 | B | 1p31.3 | . | 63375000 | 1934 | fs | fs common |
| chr01 | B | 1p31.3 | . | 63625000 | 5483 | fs | fs common |
| chr01 | B | 1p31.3 | . | 63875000 | 2701 | fs | fs common |
| chr01 | B | 1p31.3 | . | 64125000 | 1248 | fs | fs common |
| chr01 | B | 1p31.3 | . | 64375000 | 2525 | fs | fs common |
| chr01 | B | 1p31.3 | . | 64625000 | 5392 | fs | fs common |
| chr01 | B | 1p31.3 | . | 64875000 | 2850 | fs | fs common |
| chr01 | B | 1p31.3 | . | 65125000 | 4026 | fs | fs common |
| chr01 | B | 1p31.3 | . | 65375000 | 2619 | fs | fs common |
| chr01 | E | 1p31.2 | 4 | 65625000 | 2704 | fs | fs common |
| chr01 | E | 1p31.2 | 4 | 65875000 | 2440 | fs | fs common |
| chr01 | E | 1p31.2 | 4 | 66125000 | 1983 | fs | fs common |
| chr01 | E | 1p31.2 | 4 | 66375000 | 2027 | fs | fs common |
| chr01 | E | 1p31.2 | 4 | 66625000 | 2454 | fs | fs common |
| chr01 | E | 1p31.2 | 4 | 66875000 | 3199 | fs | fs common |
| chr01 | E | 1p31.2 | 4 | 67125000 | 3183 | fs | fs common |
| chr01 | E | 1p31.2 | 4 | 67375000 | 1919 | fs | fs common |
| chr01 | E | 1p31.2 | 4 | 67625000 | 3157 | fs | fs common |
| chr01 | E | 1p31.2 | 4 | 67875000 | 2807 | fs | fs common |
| chr01 | E | 1p31.2 | 4 | 68125000 | 2070 | fs | fs common |
| chr01 | E | 1p31.2 | 4 | 68375000 | 2168 | fs | fs common |
| chr01 | E | 1p31.2 | 4 | 68625000 | 2357 | fs | fs common |
| chr01 | E | 1p31.2 | 4 | 68875000 | 2306 | fs | fs common |
| chr01 | E | 1p31.2 | 4 | 69125000 | 1941 | fs | fs common |
| chr01 | E | 1p31.2 | 4 | 69375000 | 2017 | fs | fs common |
| chr01 | E | 1p31.2 | 4 | 69625000 | 1533 | fs | fs common |
| chr01 | E | 1p31.1 | 2 | 69875000 | 2383 | fs | fs common |
| chr01 | E | 1p31.1 | 2 | 70125000 | 1824 | fs | fs common |
| chr01 | E | 1p31.1 | 2 | 70375000 | 2357 | fs | fs common |
| chr01 | E | 1p31.1 | 2 | 70625000 | 2931 | fs | fs common |



|       |   |        |   |          |      |    |           |
|-------|---|--------|---|----------|------|----|-----------|
| chr01 | E | 1p31.1 | 2 | 70875000 | 4367 | fs | fs common |
| chr01 | E | 1p31.1 | 2 | 71125000 | 2578 | fs | fs common |
| chr01 | E | 1p31.1 | 2 | 71375000 | 1775 | fs | fs common |
| chr01 | E | 1p31.1 | 2 | 71625000 | 2313 | fs | fs common |
| chr01 | E | 1p31.1 | 2 | 71875000 | 2061 | fs | fs common |
| chr01 | E | 1p31.1 | 2 | 72125000 | 3116 | fs | fs common |
| chr01 | E | 1p31.1 | 2 | 72375000 | 2394 | fs | fs common |
| chr01 | E | 1p31.1 | 2 | 72625000 | 1843 | fs | fs common |
| chr01 | E | 1p31.1 | 2 | 72875000 | 1615 | fs | fs common |
| chr01 | E | 1p31.1 | 2 | 73125000 | 2374 | fs | fs common |
| chr01 | E | 1p31.1 | 2 | 73375000 | 2681 | fs | fs common |
| chr01 | E | 1p31.1 | 2 | 73625000 | 2309 | fs | fs common |
| chr01 | E | 1p31.1 | 2 | 73875000 | 1454 | fs | fs common |
| chr01 | E | 1p31.1 | 2 | 74125000 | 3507 | fs | fs common |
| chr01 | E | 1p31.1 | 2 | 74375000 | 1198 | fs | fs common |
| chr01 | E | 1p31.1 | 2 | 74625000 | 1468 | fs | fs common |
| chr01 | E | 1p31.1 | 2 | 74875000 | 3062 | fs | fs common |
| chr01 | E | 1p31.1 | 2 | 75125000 | 1797 | fs | fs common |
| chr01 | E | 1p31.1 | 2 | 75375000 | 1688 | fs | fs common |
| chr01 | E | 1p31.1 | 2 | 75625000 | 1631 | fs | fs common |
| chr01 | E | 1p31.1 | 2 | 75875000 | 1988 | fs | fs common |
| chr01 | E | 1p31.1 | 2 | 76125000 | 3272 | fs | fs common |
| chr01 | E | 1p31.1 | 2 | 76375000 | 2381 | fs | fs common |
| chr01 | E | 1p31.1 | 2 | 76625000 | 1676 | fs | fs common |
| chr01 | E | 1p31.1 | 2 | 76875000 | 1840 | fs | fs common |
| chr01 | E | 1p31.1 | 2 | 77125000 | 1729 | fs | fs common |
| chr01 | E | 1p31.1 | 2 | 77375000 | 1737 | fs | fs common |
| chr01 | E | 1p31.1 | 2 | 77625000 | 4505 | fs | fs common |
| chr01 | E | 1p31.1 | 2 | 77875000 | 2774 | fs | fs common |
| chr01 | E | 1p31.1 | 2 | 78125000 | 4565 | fs | fs common |
| chr01 | E | 1p31.1 | 2 | 78375000 | 2437 | fs | fs common |
| chr01 | E | 1p31.1 | 2 | 78625000 | 2547 | fs | fs common |
| chr01 | E | 1p31.1 | 2 | 78875000 | 1917 | fs | fs common |
| chr01 | E | 1p31.1 | 2 | 79125000 | 1927 | fs | fs common |
| chr01 | E | 1p31.1 | 2 | 79375000 | 3615 | fs | fs common |
| chr01 | E | 1p31.1 | 2 | 79625000 | 3488 | fs | fs common |

|       |   |        |   |          |      |    |           |
|-------|---|--------|---|----------|------|----|-----------|
| chr01 | E | 1p31.1 | 2 | 79875000 | 3551 | fs | fs common |
| chr01 | E | 1p31.1 | 2 | 80125000 | 2727 | fs | fs common |
| chr01 | E | 1p31.1 | 2 | 80375000 | 1925 | fs | fs common |
| chr01 | E | 1p31.1 | 2 | 80625000 | 4172 | fs | fs common |
| chr01 | E | 1p31.1 | 2 | 80875000 | 2207 | fs | fs common |
| chr01 | E | 1p31.1 | 2 | 81125000 | 1786 | fs | fs common |
| chr01 | E | 1p31.1 | 2 | 81375000 | 1719 | fs | fs common |
| chr01 | E | 1p31.1 | 2 | 81625000 | 2394 | fs | fs common |
| chr01 | E | 1p31.1 | 2 | 81875000 | 2038 | fs | fs common |
| chr01 | E | 1p31.1 | 2 | 82125000 | 2906 | fs | fs common |
| chr01 | E | 1p31.1 | 2 | 82375000 | 1373 | fs | fs common |
| chr01 | E | 1p31.1 | 2 | 82625000 | 2362 | fs | fs common |
| chr01 | E | 1p31.1 | 2 | 82875000 | 2159 | fs | fs common |
| chr01 | E | 1p31.1 | 2 | 83125000 | 3117 | fs | fs common |
| chr01 | E | 1p31.1 | 2 | 83375000 | 2499 | fs | fs common |
| chr01 | E | 1p31.1 | 2 | 83625000 | 1260 | fs | fs common |
| chr01 | E | 1p31.1 | 2 | 83875000 | 1624 | fs | fs common |
| chr01 | E | 1p31.1 | 2 | 84125000 | 3160 | fs | fs common |
| chr01 | E | 1p31.1 | 2 | 84375000 | 1585 | fs | fs common |
| chr01 | E | 1p22.3 | 1 | 84625000 | 1533 | fs | fs common |
| chr01 | E | 1p22.3 | 1 | 84875000 | 2100 | fs | fs common |
| chr01 | E | 1p22.3 | 1 | 85125000 | 3210 | fs | fs common |
| chr01 | E | 1p22.3 | 1 | 85375000 | 2462 | fs | fs common |
| chr01 | E | 1p22.3 | 1 | 85625000 | 1754 | fs | fs common |
| chr01 | E | 1p22.3 | 1 | 85875000 | 2127 | fs | fs common |
| chr01 | E | 1p22.3 | 1 | 86125000 | 1438 | fs | fs common |
| chr01 | E | 1p22.3 | 1 | 86375000 | 3334 | fs | fs common |
| chr01 | E | 1p22.3 | 1 | 86625000 | 1665 | fs | fs common |
| chr01 | E | 1p22.3 | 1 | 86875000 | 4362 | fs | fs common |
| chr01 | E | 1p22.3 | 1 | 87125000 | 3346 | fs | fs common |
| chr01 | E | 1p22.3 | 1 | 87375000 | 1520 | fs | fs common |
| chr01 | E | 1p22.3 | 1 | 87625000 | 1209 | fs | fs common |
| chr01 | E | 1p22.3 | 1 | 87875000 | 1880 | fs | fs common |
| chr01 | E | 1p22.3 | 1 | 88125000 | 2141 | fs | fs common |
| chr01 | E | 1p22.2 | 2 | 88375000 | 1616 | fs | fs common |
| chr01 | E | 1p22.2 | 2 | 88625000 | 3357 | fs | fs common |

|       |   |        |   |          |      |    |                    |
|-------|---|--------|---|----------|------|----|--------------------|
| chr01 | E | 1p22.2 | 2 | 88875000 | 2238 | fs | fs common          |
| chr01 | E | 1p22.2 | 2 | 89125000 | 3103 | fs | fs common          |
| chr01 | E | 1p22.2 | 2 | 89375000 | 2176 | fs | fs common          |
| chr01 | E | 1p22.2 | 2 | 89625000 | 1351 | fs | fs common          |
| chr01 | E | 1p22.2 | 2 | 89875000 | 2202 | fs | fs common          |
| chr01 | E | 1p22.2 | 2 | 90125000 | 1680 | fs | fs common          |
| chr01 | E | 1p22.2 | 2 | 90375000 | 2243 | fs | fs common          |
| chr01 | E | 1p22.2 | 2 | 90625000 | 3167 | fs | fs common          |
| chr01 | E | 1p22.2 | 2 | 90875000 | 2012 | fs | fs common          |
| chr01 | E | 1p22.2 | 2 | 91125000 | 1627 | fs | fs common          |
| chr01 | E | 1p22.2 | 2 | 91375000 | 5087 | fs | fs common          |
| chr01 | E | 1p22.2 | 2 | 91625000 | 3445 | fs | fs common          |
| chr01 | E | 1p22.1 | 2 | 91875000 | 3217 | fs | fs common          |
| chr01 | E | 1p22.1 | 2 | 92125000 | 3706 | fs | fs common          |
| chr01 | E | 1p22.1 | 2 | 92375000 | 2028 | fs | fs common          |
| chr01 | E | 1p22.1 | 2 | 92625000 | 2369 | fs | fs common          |
| chr01 | E | 1p22.1 | 2 | 92875000 | 3002 | fs | fs common          |
| chr01 | E | 1p22.1 | 2 | 93125000 | 1548 | fs | fs common          |
| chr01 | E | 1p22.1 | 2 | 93375000 | 2424 | fs | fs common          |
| chr01 | E | 1p22.1 | 2 | 93625000 | 2853 | fs | fs common          |
| chr01 | E | 1p22.1 | 2 | 93875000 | 1740 | fs | fs common          |
| chr01 | E | 1p22.1 | 2 | 94125000 | 2083 | fs | fs common          |
| chr01 | E | 1p22.1 | 2 | 94375000 | 1677 | fs | fs common          |
| chr01 | B | 1p21.3 | . | 94625000 | 2174 | fs | fs common and rare |
| chr01 | B | 1p21.3 | . | 94875000 | 2810 | fs | fs common and rare |
| chr01 | B | 1p21.3 | . | 95125000 | 1844 | fs | fs common and rare |
| chr01 | B | 1p21.3 | . | 95375000 | 2651 | fs | fs common and rare |
| chr01 | B | 1p21.3 | . | 95625000 | 2351 | fs | fs common and rare |
| chr01 | B | 1p21.3 | . | 95875000 | 2312 | fs | fs common and rare |
| chr01 | B | 1p21.3 | . | 96125000 | 1922 | fs | fs common and rare |
| chr01 | B | 1p21.3 | . | 96375000 | 3230 | fs | fs common and rare |
| chr01 | B | 1p21.3 | . | 96625000 | 2030 | fs | fs common and rare |
| chr01 | B | 1p21.3 | . | 96875000 | 3005 | fs | fs common and rare |
| chr01 | B | 1p21.3 | . | 97125000 | 1990 | fs | fs common and rare |
| chr01 | B | 1p21.3 | . | 97375000 | 2653 | fs | fs common and rare |
| chr01 | B | 1p21.3 | . | 97625000 | 2539 | fs | fs common and rare |

|       |   |        |   |           |       |      |                    |
|-------|---|--------|---|-----------|-------|------|--------------------|
| chr01 | B | 1p21.3 | . | 97875000  | 1736  | fs   | fs common and rare |
| chr01 | B | 1p21.3 | . | 98125000  | 1512  | fs   | fs common and rare |
| chr01 | B | 1p21.3 | . | 98375000  | 2110  | fs   | fs common and rare |
| chr01 | B | 1p21.3 | . | 98625000  | 2698  | fs   | fs common and rare |
| chr01 | B | 1p21.3 | . | 98875000  | 1795  | fs   | fs common and rare |
| chr01 | B | 1p21.3 | . | 99125000  | 1783  | fs   | fs common and rare |
| chr01 | B | 1p21.3 | . | 99375000  | 2727  | fs   | fs common and rare |
| chr01 | B | 1p21.3 | . | 99625000  | 2803  | fs   | fs common and rare |
| chr01 | B | 1p21.2 | . | 99875000  | 3049  | fs   | fs common and rare |
| chr01 | B | 1p21.2 | . | 100000000 | 4337  | fs   | fs common and rare |
| chr01 | B | 1p21.2 | . | 100000000 | 2176  | fs   | fs common and rare |
| chr01 | B | 1p21.2 | . | 101000000 | 2847  | fs   | fs common and rare |
| chr01 | B | 1p21.2 | . | 101000000 | 1808  | fs   | fs common and rare |
| chr01 | B | 1p21.2 | . | 101000000 | 1669  | fs   | fs common and rare |
| chr01 | B | 1p21.2 | . | 101000000 | 3065  | fs   | fs common and rare |
| chr01 | B | 1p21.2 | . | 102000000 | 3848  | fs   | fs common and rare |
| chr01 | B | 1p21.2 | . | 102000000 | 1320  | fs   | fs common and rare |
| chr01 | E | 1p21.1 | 1 | 102000000 | 1687  | nofs | nofs               |
| chr01 | E | 1p21.1 | 1 | 102000000 | 2915  | nofs | nofs               |
| chr01 | E | 1p21.1 | 1 | 103000000 | 2128  | nofs | nofs               |
| chr01 | E | 1p21.1 | 1 | 103000000 | 3736  | nofs | nofs               |
| chr01 | E | 1p21.1 | 1 | 103000000 | 2336  | nofs | nofs               |
| chr01 | E | 1p21.1 | 1 | 103000000 | 3504  | nofs | nofs               |
| chr01 | E | 1p21.1 | 1 | 104000000 | 1249  | nofs | nofs               |
| chr01 | E | 1p21.1 | 1 | 104000000 | 1846  | nofs | nofs               |
| chr01 | E | 1p21.1 | 1 | 104000000 | 15167 | nofs | nofs               |
| chr01 | E | 1p21.1 | 1 | 104000000 | 3601  | nofs | nofs               |
| chr01 | E | 1p21.1 | 1 | 105000000 | 1746  | nofs | nofs               |
| chr01 | E | 1p21.1 | 1 | 105000000 | 2695  | nofs | nofs               |
| chr01 | E | 1p21.1 | 1 | 105000000 | 4477  | nofs | nofs               |
| chr01 | E | 1p21.1 | 1 | 105000000 | 3078  | nofs | nofs               |
| chr01 | E | 1p21.1 | 1 | 106000000 | 2507  | nofs | nofs               |
| chr01 | E | 1p21.1 | 1 | 106000000 | 2763  | nofs | nofs               |
| chr01 | E | 1p21.1 | 1 | 106000000 | 3590  | nofs | nofs               |
| chr01 | E | 1p21.1 | 1 | 106000000 | 2379  | nofs | nofs               |
| chr01 | E | 1p21.1 | 1 | 107000000 | 2999  | nofs | nofs               |

|       |   |        |   |           |      |      |      |
|-------|---|--------|---|-----------|------|------|------|
| chr01 | E | 1p21.1 | 1 | 107000000 | 1964 | nofs | nofs |
| chr01 | E | 1p13.3 | 1 | 107000000 | 2500 | nofs | nofs |
| chr01 | E | 1p13.3 | 1 | 107000000 | 2360 | nofs | nofs |
| chr01 | E | 1p13.3 | 1 | 108000000 | 1854 | nofs | nofs |
| chr01 | E | 1p13.3 | 1 | 108000000 | 1258 | nofs | nofs |
| chr01 | E | 1p13.3 | 1 | 108000000 | 1485 | nofs | nofs |
| chr01 | E | 1p13.3 | 1 | 108000000 | 3192 | nofs | nofs |
| chr01 | E | 1p13.3 | 1 | 109000000 | 4952 | nofs | nofs |
| chr01 | E | 1p13.3 | 1 | 109000000 | 4453 | nofs | nofs |
| chr01 | E | 1p13.3 | 1 | 109000000 | 3222 | nofs | nofs |
| chr01 | E | 1p13.3 | 1 | 109000000 | 4318 | nofs | nofs |
| chr01 | E | 1p13.3 | 1 | 110000000 | 2009 | nofs | nofs |
| chr01 | E | 1p13.3 | 1 | 110000000 | 2047 | nofs | nofs |
| chr01 | E | 1p13.3 | 1 | 110000000 | 1869 | nofs | nofs |
| chr01 | E | 1p13.3 | 1 | 110000000 | 2520 | nofs | nofs |
| chr01 | E | 1p13.3 | 1 | 111000000 | 1914 | nofs | nofs |
| chr01 | E | 1p13.3 | 1 | 111000000 | 2399 | nofs | nofs |
| chr01 | E | 1p13.3 | 1 | 111000000 | 1355 | nofs | nofs |
| chr01 | E | 1p13.3 | 1 | 111000000 | 1430 | nofs | nofs |
| chr01 | E | 1p13.3 | 1 | 112000000 | 1532 | nofs | nofs |
| chr01 | E | 1p13.2 | 2 | 112000000 | 4042 | nofs | nofs |
| chr01 | E | 1p13.2 | 2 | 112000000 | 1442 | nofs | nofs |
| chr01 | E | 1p13.2 | 2 | 112000000 | 3428 | nofs | nofs |
| chr01 | E | 1p13.2 | 2 | 113000000 | 4475 | nofs | nofs |
| chr01 | E | 1p13.2 | 2 | 113000000 | 3266 | nofs | nofs |
| chr01 | E | 1p13.2 | 2 | 113000000 | 7497 | nofs | nofs |
| chr01 | E | 1p13.2 | 2 | 113000000 | 5132 | nofs | nofs |
| chr01 | E | 1p13.2 | 2 | 114000000 | 2432 | nofs | nofs |
| chr01 | E | 1p13.2 | 2 | 114000000 | 2160 | nofs | nofs |
| chr01 | E | 1p13.2 | 2 | 114000000 | 2213 | nofs | nofs |
| chr01 | E | 1p13.2 | 2 | 114000000 | 2947 | nofs | nofs |
| chr01 | E | 1p13.2 | 2 | 115000000 | 3728 | nofs | nofs |
| chr01 | E | 1p13.2 | 2 | 115000000 | 2533 | nofs | nofs |
| chr01 | E | 1p13.1 | 1 | 115000000 | 2797 | nofs | nofs |
| chr01 | E | 1p13.1 | 1 | 115000000 | 1379 | nofs | nofs |
| chr01 | E | 1p13.1 | 1 | 116000000 | 3562 | nofs | nofs |

|       |   |        |   |           |       |      |      |
|-------|---|--------|---|-----------|-------|------|------|
| chr01 | E | 1p13.1 | 1 | 116000000 | 1844  | nofs | nofs |
| chr01 | E | 1p13.1 | 1 | 116000000 | 2378  | nofs | nofs |
| chr01 | E | 1p13.1 | 1 | 116000000 | 2597  | nofs | nofs |
| chr01 | E | 1p13.1 | 1 | 117000000 | 2439  | nofs | nofs |
| chr01 | E | 1p13.1 | 1 | 117000000 | 1998  | nofs | nofs |
| chr01 | E | 1p13.1 | 1 | 117000000 | 2011  | nofs | nofs |
| chr01 | E | 1p13.1 | 1 | 117000000 | 2309  | nofs | nofs |
| chr01 | B | 1p12   | . | 118000000 | 3930  | nofs | nofs |
| chr01 | B | 1p12   | . | 118000000 | 2249  | nofs | nofs |
| chr01 | C | 1p12   | . | 118000000 | 1183  | nofs | nofs |
| chr01 | C | 1p12   | . | 118000000 | 3021  | nofs | nofs |
| chr01 | C | 1p12   | . | 119000000 | 3729  | nofs | nofs |
| chr01 | C | 1p12   | . | 119000000 | 2383  | nofs | nofs |
| chr01 | C | 1p12   | . | 119000000 | 1967  | nofs | nofs |
| chr01 | C | 1p12   | . | 119000000 | 2904  | nofs | nofs |
| chr01 | C | 1p12   | . | 120000000 | 3251  | nofs | nofs |
| chr01 | C | 1p11   | . | 120000000 | 2010  | nofs | nofs |
| chr01 | C | 1p11   | . | 120000000 | 2034  | nofs | nofs |
| chr01 | C | 1p11   | . | 120000000 | 1283  | nofs | nofs |
| chr01 | C | 1p11   | . | 121000000 | 1253  | nofs | nofs |
| chr01 | C | 1p11   | . | 121000000 | 40583 | nofs | nofs |
| chr01 | C | 1p11   | . | 121000000 | 95145 | nofs | nofs |
| chr01 | C |        | . | 121000000 | 0     | nofs | nofs |
| chr01 | C |        | . | 122000000 | 0     | nofs | nofs |
| chr01 | C |        | . | 122000000 | 0     | nofs | nofs |
| chr01 | C |        | . | 122000000 | 0     | nofs | nofs |
| chr01 | C |        | . | 122000000 | 0     | nofs | nofs |
| chr01 | C |        | . | 123000000 | 0     | nofs | nofs |
| chr01 | C |        | . | 123000000 | 0     | nofs | nofs |
| chr01 | C |        | . | 123000000 | 0     | nofs | nofs |
| chr01 | C |        | . | 123000000 | 0     | nofs | nofs |
| chr01 | C |        | . | 124000000 | 0     | nofs | nofs |
| chr01 | C |        | . | 124000000 | 0     | nofs | nofs |
| chr01 | C |        | . | 124000000 | 0     | nofs | nofs |
| chr01 | C |        | . | 124000000 | 0     | nofs | nofs |
| chr01 | C |        | . | 125000000 | 0     | nofs | nofs |

|       |   |   |           |   |      |      |
|-------|---|---|-----------|---|------|------|
| chr01 | C | . | 125000000 | 0 | nofs | nofs |
| chr01 | C | . | 125000000 | 0 | nofs | nofs |
| chr01 | C | . | 125000000 | 0 | nofs | nofs |
| chr01 | C | . | 126000000 | 0 | nofs | nofs |
| chr01 | C | . | 126000000 | 0 | nofs | nofs |
| chr01 | C | . | 126000000 | 0 | nofs | nofs |
| chr01 | C | . | 126000000 | 0 | nofs | nofs |
| chr01 | C | . | 127000000 | 0 | nofs | nofs |
| chr01 | C | . | 127000000 | 0 | nofs | nofs |
| chr01 | C | . | 127000000 | 0 | nofs | nofs |
| chr01 | C | . | 127000000 | 0 | nofs | nofs |
| chr01 | C | . | 128000000 | 0 | nofs | nofs |
| chr01 | C | . | 128000000 | 0 | nofs | nofs |
| chr01 | C | . | 128000000 | 0 | nofs | nofs |
| chr01 | C | . | 128000000 | 0 | nofs | nofs |
| chr01 | C | . | 129000000 | 0 | nofs | nofs |
| chr01 | C | . | 129000000 | 0 | nofs | nofs |
| chr01 | C | . | 129000000 | 0 | nofs | nofs |
| chr01 | C | . | 129000000 | 0 | nofs | nofs |
| chr01 | C | . | 130000000 | 0 | nofs | nofs |
| chr01 | C | . | 130000000 | 0 | nofs | nofs |
| chr01 | C | . | 130000000 | 0 | nofs | nofs |
| chr01 | C | . | 130000000 | 0 | nofs | nofs |
| chr01 | C | . | 131000000 | 0 | nofs | nofs |
| chr01 | C | . | 131000000 | 0 | nofs | nofs |
| chr01 | C | . | 131000000 | 0 | nofs | nofs |
| chr01 | C | . | 131000000 | 0 | nofs | nofs |
| chr01 | C | . | 132000000 | 0 | nofs | nofs |
| chr01 | C | . | 132000000 | 0 | nofs | nofs |
| chr01 | C | . | 132000000 | 0 | nofs | nofs |
| chr01 | C | . | 132000000 | 0 | nofs | nofs |
| chr01 | C | . | 133000000 | 0 | nofs | nofs |
| chr01 | C | . | 133000000 | 0 | nofs | nofs |
| chr01 | C | . | 133000000 | 0 | nofs | nofs |
| chr01 | C | . | 133000000 | 0 | nofs | nofs |
| chr01 | C | . | 134000000 | 0 | nofs | nofs |

|       |   |   |           |      |           |           |
|-------|---|---|-----------|------|-----------|-----------|
| chr01 | C | . | 134000000 | 0    | nofs      | nofs      |
| chr01 | C | . | 134000000 | 0    | nofs      | nofs      |
| chr01 | C | . | 134000000 | 0    | nofs      | nofs      |
| chr01 | C | . | 135000000 | 0    | nofs      | nofs      |
| chr01 | C | . | 135000000 | 0    | nofs      | nofs      |
| chr01 | C | . | 135000000 | 0    | nofs      | nofs      |
| chr01 | C | . | 135000000 | 0    | nofs      | nofs      |
| chr01 | C | . | 136000000 | 0    | nofs      | nofs      |
| chr01 | C | . | 136000000 | 0    | nofs      | nofs      |
| chr01 | C | . | 136000000 | 0    | nofs      | nofs      |
| chr01 | C | . | 136000000 | 0    | nofs      | nofs      |
| chr01 | C | . | 137000000 | 0    | nofs      | nofs      |
| chr01 | C | . | 137000000 | 0    | nofs      | nofs      |
| chr01 | C | . | 137000000 | 0    | nofs      | nofs      |
| chr01 | C | . | 137000000 | 0    | nofs      | nofs      |
| chr01 | C | . | 138000000 | 0    | nofs      | nofs      |
| chr01 | C | . | 138000000 | 0    | nofs      | nofs      |
| chr01 | C | . | 138000000 | 0    | nofs      | nofs      |
| chr01 | C | . | 138000000 | 0    | nofs      | nofs      |
| chr01 | C | . | 139000000 | 0    | nofs      | nofs      |
| chr01 | C | . | 139000000 | 0    | nofs      | nofs      |
| chr01 | C | . | 139000000 | 0    | nofs      | nofs      |
| chr01 | C | . | 139000000 | 0    | nofs      | nofs      |
| chr01 | C | . | 140000000 | 0    | nofs      | nofs      |
| chr01 | C | . | 140000000 | 0    | nofs      | nofs      |
| chr01 | C | . | 140000000 | 0    | nofs      | nofs      |
| chr01 | C | . | 140000000 | 0    | nofs      | nofs      |
| chr01 | C | . | 141000000 | 0    | nofs      | nofs      |
| chr01 | C | . | 141000000 | 0    | nofs      | nofs      |
| chr01 | C | . | 141000000 | 0    | nofs      | nofs      |
| chr01 | C | . | 141000000 | 0    | nofs      | nofs      |
| chr01 | C | . | 141000000 | 1306 | nofs      | nofs      |
| chr01 | C | . | 142000000 | 934  | fs common | fs common |
| chr01 | C | . | 142000000 | 1007 | fs        | fs common |
| chr01 | C | . | 142000000 | 948  | fs        | fs common |
| chr01 | C | . | 142000000 | 948  | fs        | fs common |
| chr01 | C | . | 142000000 | 1462 | fs        | fs common |
| chr01 | C | . | 1q12      |      |           |           |
| chr01 | C | . | 1q12      |      |           |           |
| chr01 | C | . | 1q12      |      |           |           |
| chr01 | C | . | 1q12      |      |           |           |
| chr01 | C | . | 1q12      |      |           |           |



|       |   |        |   |           |       |    |           |
|-------|---|--------|---|-----------|-------|----|-----------|
| chr01 | C | 1q21.1 | . | 143000000 | 1946  | fs | fs common |
| chr01 | C | 1q21.1 | . | 143000000 | 3714  | fs | fs common |
| chr01 | C | 1q21.1 | . | 143000000 | 3995  | fs | fs common |
| chr01 | C | 1q21.1 | . | 143000000 | 2034  | fs | fs common |
| chr01 | C | 1q21.1 | . | 144000000 | 1750  | fs | fs common |
| chr01 | C | 1q21.1 | . | 144000000 | 2705  | fs | fs common |
| chr01 | C | 1q21.1 | . | 144000000 | 2002  | fs | fs common |
| chr01 | C | 1q21.1 | . | 144000000 | 2267  | fs | fs common |
| chr01 | B | 1q21.1 | . | 145000000 | 4231  | fs | fs common |
| chr01 | B | 1q21.1 | . | 145000000 | 3464  | fs | fs common |
| chr01 | B | 1q21.1 | . | 145000000 | 1328  | fs | fs common |
| chr01 | B | 1q21.1 | . | 145000000 | 2314  | fs | fs common |
| chr01 | B | 1q21.1 | . | 146000000 | 5995  | fs | fs common |
| chr01 | B | 1q21.1 | . | 146000000 | 7754  | fs | fs common |
| chr01 | B | 1q21.1 | . | 146000000 | 1165  | fs | fs common |
| chr01 | B | 1q21.1 | . | 146000000 | 1471  | fs | fs common |
| chr01 | B | 1q21.1 | . | 147000000 | 2947  | fs | fs common |
| chr01 | B | 1q21.2 | . | 147000000 | 2736  | fs | fs common |
| chr01 | B | 1q21.2 | . | 147000000 | 4470  | fs | fs common |
| chr01 | B | 1q21.2 | . | 147000000 | 6229  | fs | fs common |
| chr01 | B | 1q21.2 | . | 148000000 | 6335  | fs | fs common |
| chr01 | B | 1q21.2 | . | 148000000 | 6691  | fs | fs common |
| chr01 | E | 1q21.3 | 1 | 148000000 | 4274  | fs | fs common |
| chr01 | E | 1q21.3 | 1 | 148000000 | 4984  | fs | fs common |
| chr01 | E | 1q21.3 | 1 | 149000000 | 2491  | fs | fs common |
| chr01 | E | 1q21.3 | 1 | 149000000 | 9532  | fs | fs common |
| chr01 | E | 1q21.3 | 1 | 149000000 | 10338 | fs | fs common |
| chr01 | E | 1q21.3 | 1 | 149000000 | 4174  | fs | fs common |
| chr01 | E | 1q21.3 | 1 | 150000000 | 4347  | fs | fs common |
| chr01 | E | 1q21.3 | 1 | 150000000 | 2147  | fs | fs common |
| chr01 | E | 1q21.3 | 1 | 150000000 | 4256  | fs | fs common |
| chr01 | E | 1q21.3 | 1 | 150000000 | 5316  | fs | fs common |
| chr01 | E | 1q21.3 | 1 | 151000000 | 4392  | fs | fs common |
| chr01 | E | 1q21.3 | 1 | 151000000 | 5428  | fs | fs common |
| chr01 | E | 1q21.3 | 1 | 151000000 | 3734  | fs | fs common |
| chr01 | E | 1q21.3 | 1 | 151000000 | 3390  | fs | fs common |

|       |   |      |   |           |      |      |      |
|-------|---|------|---|-----------|------|------|------|
| chr01 | B | 1q22 | . | 152000000 | 3027 | nofs | nofs |
| chr01 | B | 1q22 | . | 152000000 | 4673 | nofs | nofs |
| chr01 | B | 1q22 | . | 152000000 | 6803 | nofs | nofs |
| chr01 | B | 1q22 | . | 152000000 | 4692 | nofs | nofs |
| chr01 | B | 1q22 | . | 153000000 | 5598 | nofs | nofs |
| chr01 | B | 1q22 | . | 153000000 | 3483 | nofs | nofs |
| chr01 | B | 1q22 | . | 153000000 | 6095 | nofs | nofs |
| chr01 | B | 1q22 | . | 153000000 | 4308 | nofs | nofs |
| chr01 | E | 1q23 | 4 | 154000000 | 3268 | nofs | nofs |
| chr01 | E | 1q23 | 4 | 154000000 | 2283 | nofs | nofs |
| chr01 | E | 1q23 | 4 | 154000000 | 3367 | nofs | nofs |
| chr01 | E | 1q23 | 4 | 154000000 | 2105 | nofs | nofs |
| chr01 | E | 1q23 | 4 | 155000000 | 1669 | nofs | nofs |
| chr01 | E | 1q23 | 4 | 155000000 | 1722 | nofs | nofs |
| chr01 | E | 1q23 | 4 | 155000000 | 1741 | nofs | nofs |
| chr01 | E | 1q23 | 4 | 155000000 | 2344 | nofs | nofs |
| chr01 | E | 1q23 | 4 | 156000000 | 1991 | nofs | nofs |
| chr01 | E | 1q23 | 4 | 156000000 | 2248 | nofs | nofs |
| chr01 | E | 1q23 | 4 | 156000000 | 1756 | nofs | nofs |
| chr01 | E | 1q23 | 4 | 156000000 | 2186 | nofs | nofs |
| chr01 | E | 1q23 | 4 | 157000000 | 1941 | nofs | nofs |
| chr01 | E | 1q23 | 4 | 157000000 | 2874 | nofs | nofs |
| chr01 | E | 1q23 | 4 | 157000000 | 2263 | nofs | nofs |
| chr01 | E | 1q23 | 4 | 157000000 | 3701 | nofs | nofs |
| chr01 | E | 1q23 | 4 | 158000000 | 3629 | nofs | nofs |
| chr01 | E | 1q23 | 4 | 158000000 | 7018 | nofs | nofs |
| chr01 | E | 1q23 | 4 | 158000000 | 5522 | nofs | nofs |
| chr01 | E | 1q23 | 4 | 158000000 | 2566 | nofs | nofs |
| chr01 | E | 1q23 | 4 | 159000000 | 2490 | nofs | nofs |
| chr01 | E | 1q23 | 4 | 159000000 | 3117 | nofs | nofs |
| chr01 | E | 1q23 | 4 | 159000000 | 3075 | nofs | nofs |
| chr01 | E | 1q23 | 4 | 159000000 | 3197 | nofs | nofs |
| chr01 | E | 1q23 | 4 | 160000000 | 2251 | nofs | nofs |
| chr01 | E | 1q23 | 4 | 160000000 | 2345 | nofs | nofs |
| chr01 | E | 1q23 | 4 | 160000000 | 3501 | nofs | nofs |
| chr01 | E | 1q23 | 4 | 160000000 | 3158 | nofs | nofs |

|       |   |      |   |           |      |      |      |
|-------|---|------|---|-----------|------|------|------|
| chr01 | E | 1q23 | 4 | 161000000 | 1249 | nofs | nofs |
| chr01 | E | 1q23 | 4 | 161000000 | 1690 | nofs | nofs |
| chr01 | E | 1q23 | 4 | 161000000 | 3021 | nofs | nofs |
| chr01 | E | 1q23 | 4 | 161000000 | 2066 | nofs | nofs |
| chr01 | E | 1q23 | 4 | 162000000 | 1694 | nofs | nofs |
| chr01 | E | 1q23 | 4 | 162000000 | 1894 | nofs | nofs |
| chr01 | E | 1q23 | 4 | 162000000 | 1905 | nofs | nofs |
| chr01 | E | 1q24 | 3 | 162000000 | 3165 | nofs | nofs |
| chr01 | E | 1q24 | 3 | 163000000 | 4098 | nofs | nofs |
| chr01 | E | 1q24 | 3 | 163000000 | 2998 | nofs | nofs |
| chr01 | E | 1q24 | 3 | 163000000 | 2531 | nofs | nofs |
| chr01 | E | 1q24 | 3 | 163000000 | 2364 | nofs | nofs |
| chr01 | E | 1q24 | 3 | 164000000 | 1963 | nofs | nofs |
| chr01 | E | 1q24 | 3 | 164000000 | 3483 | nofs | nofs |
| chr01 | E | 1q24 | 3 | 164000000 | 2174 | nofs | nofs |
| chr01 | E | 1q24 | 3 | 164000000 | 2869 | nofs | nofs |
| chr01 | E | 1q24 | 3 | 165000000 | 2818 | nofs | nofs |
| chr01 | E | 1q24 | 3 | 165000000 | 4739 | nofs | nofs |
| chr01 | E | 1q24 | 3 | 165000000 | 3074 | nofs | nofs |
| chr01 | E | 1q24 | 3 | 165000000 | 2337 | nofs | nofs |
| chr01 | E | 1q24 | 3 | 166000000 | 4490 | nofs | nofs |
| chr01 | E | 1q24 | 3 | 166000000 | 2426 | nofs | nofs |
| chr01 | E | 1q24 | 3 | 166000000 | 3795 | nofs | nofs |
| chr01 | E | 1q24 | 3 | 166000000 | 4151 | nofs | nofs |
| chr01 | E | 1q24 | 3 | 167000000 | 1878 | nofs | nofs |
| chr01 | E | 1q24 | 3 | 167000000 | 2327 | nofs | nofs |
| chr01 | E | 1q24 | 3 | 167000000 | 2224 | nofs | nofs |
| chr01 | E | 1q24 | 3 | 167000000 | 2227 | nofs | nofs |
| chr01 | E | 1q24 | 3 | 168000000 | 2394 | nofs | nofs |
| chr01 | E | 1q24 | 3 | 168000000 | 2994 | nofs | nofs |
| chr01 | E | 1q24 | 3 | 168000000 | 3189 | nofs | nofs |
| chr01 | E | 1q24 | 3 | 168000000 | 3399 | nofs | nofs |
| chr01 | E | 1q24 | 3 | 169000000 | 2583 | nofs | nofs |
| chr01 | E | 1q24 | 3 | 169000000 | 1722 | nofs | nofs |
| chr01 | E | 1q24 | 3 | 169000000 | 2378 | nofs | nofs |
| chr01 | E | 1q24 | 3 | 169000000 | 3254 | nofs | nofs |

|       |   |      |   |           |      |      |           |
|-------|---|------|---|-----------|------|------|-----------|
| chr01 | E | 1q24 | 3 | 170000000 | 2421 | nofs | nofs      |
| chr01 | E | 1q25 | 2 | 170000000 | 1824 | nofs | nofs      |
| chr01 | E | 1q25 | 2 | 170000000 | 2673 | fs   | fs common |
| chr01 | E | 1q25 | 2 | 170000000 | 3278 | fs   | fs common |
| chr01 | E | 1q25 | 2 | 171000000 | 2529 | fs   | fs common |
| chr01 | E | 1q25 | 2 | 171000000 | 3840 | fs   | fs common |
| chr01 | E | 1q25 | 2 | 171000000 | 3983 | fs   | fs common |
| chr01 | E | 1q25 | 2 | 171000000 | 4066 | fs   | fs common |
| chr01 | E | 1q25 | 2 | 172000000 | 3302 | fs   | fs common |
| chr01 | E | 1q25 | 2 | 172000000 | 5783 | fs   | fs common |
| chr01 | E | 1q25 | 2 | 172000000 | 2553 | fs   | fs common |
| chr01 | E | 1q25 | 2 | 172000000 | 2495 | fs   | fs common |
| chr01 | E | 1q25 | 2 | 173000000 | 1267 | fs   | fs common |
| chr01 | E | 1q25 | 2 | 173000000 | 3544 | fs   | fs common |
| chr01 | E | 1q25 | 2 | 173000000 | 3387 | nofs | nofs      |
| chr01 | E | 1q25 | 2 | 173000000 | 3360 | nofs | nofs      |
| chr01 | E | 1q25 | 2 | 174000000 | 2232 | nofs | nofs      |
| chr01 | E | 1q25 | 2 | 174000000 | 1922 | nofs | nofs      |
| chr01 | E | 1q25 | 2 | 174000000 | 2608 | nofs | nofs      |
| chr01 | E | 1q25 | 2 | 174000000 | 1266 | nofs | nofs      |
| chr01 | E | 1q25 | 2 | 175000000 | 2525 | nofs | nofs      |
| chr01 | E | 1q25 | 2 | 175000000 | 3057 | nofs | nofs      |
| chr01 | E | 1q25 | 2 | 175000000 | 1767 | nofs | nofs      |
| chr01 | E | 1q25 | 2 | 175000000 | 2979 | nofs | nofs      |
| chr01 | E | 1q25 | 2 | 176000000 | 2826 | nofs | nofs      |
| chr01 | E | 1q25 | 2 | 176000000 | 3306 | nofs | nofs      |
| chr01 | E | 1q25 | 2 | 176000000 | 2900 | nofs | nofs      |
| chr01 | E | 1q25 | 2 | 176000000 | 1200 | nofs | nofs      |
| chr01 | E | 1q25 | 2 | 177000000 | 2299 | nofs | nofs      |
| chr01 | E | 1q25 | 2 | 177000000 | 2488 | nofs | nofs      |
| chr01 | E | 1q25 | 2 | 177000000 | 1610 | nofs | nofs      |
| chr01 | E | 1q25 | 2 | 177000000 | 3285 | nofs | nofs      |
| chr01 | E | 1q25 | 2 | 178000000 | 2415 | nofs | nofs      |
| chr01 | E | 1q25 | 2 | 178000000 | 2770 | nofs | nofs      |
| chr01 | E | 1q25 | 2 | 178000000 | 3692 | nofs | nofs      |
| chr01 | E | 1q25 | 2 | 178000000 | 2295 | nofs | nofs      |

|       |   |      |   |           |      |      |           |
|-------|---|------|---|-----------|------|------|-----------|
| chr01 | E | 1q25 | 2 | 179000000 | 2032 | nofs | nofs      |
| chr01 | E | 1q25 | 2 | 179000000 | 1846 | nofs | nofs      |
| chr01 | E | 1q25 | 2 | 179000000 | 4666 | nofs | nofs      |
| chr01 | E | 1q25 | 2 | 179000000 | 3572 | nofs | nofs      |
| chr01 | E | 1q25 | 2 | 180000000 | 3013 | nofs | nofs      |
| chr01 | E | 1q25 | 2 | 180000000 | 2810 | nofs | nofs      |
| chr01 | E | 1q25 | 2 | 180000000 | 2753 | nofs | nofs      |
| chr01 | E | 1q25 | 2 | 180000000 | 2031 | nofs | nofs      |
| chr01 | E | 1q25 | 2 | 181000000 | 1737 | nofs | nofs      |
| chr01 | E | 1q25 | 2 | 181000000 | 1843 | nofs | nofs      |
| chr01 | E | 1q25 | 2 | 181000000 | 2639 | nofs | nofs      |
| chr01 | E | 1q25 | 2 | 181000000 | 1978 | nofs | nofs      |
| chr01 | E | 1q25 | 2 | 182000000 | 2242 | nofs | nofs      |
| chr01 | E | 1q25 | 2 | 182000000 | 1590 | nofs | nofs      |
| chr01 | E | 1q25 | 2 | 182000000 | 3180 | nofs | nofs      |
| chr01 | E | 1q25 | 2 | 182000000 | 2728 | nofs | nofs      |
| chr01 | E | 1q25 | 2 | 183000000 | 2289 | nofs | nofs      |
| chr01 | E | 1q31 | 3 | 183000000 | 1929 | fs   | fs common |
| chr01 | E | 1q31 | 3 | 183000000 | 3794 | fs   | fs common |
| chr01 | E | 1q31 | 3 | 183000000 | 2972 | fs   | fs common |
| chr01 | E | 1q31 | 3 | 184000000 | 3573 | fs   | fs common |
| chr01 | E | 1q31 | 3 | 184000000 | 2489 | fs   | fs common |
| chr01 | E | 1q31 | 3 | 184000000 | 1834 | fs   | fs common |
| chr01 | E | 1q31 | 3 | 184000000 | 4884 | fs   | fs common |
| chr01 | E | 1q31 | 3 | 185000000 | 1991 | fs   | fs common |
| chr01 | E | 1q31 | 3 | 185000000 | 2989 | fs   | fs common |
| chr01 | E | 1q31 | 3 | 185000000 | 2565 | fs   | fs common |
| chr01 | E | 1q31 | 3 | 185000000 | 2525 | fs   | fs common |
| chr01 | E | 1q31 | 3 | 186000000 | 4107 | fs   | fs common |
| chr01 | E | 1q31 | 3 | 186000000 | 3654 | fs   | fs common |
| chr01 | E | 1q31 | 3 | 186000000 | 2587 | fs   | fs common |
| chr01 | E | 1q31 | 3 | 186000000 | 4091 | fs   | fs common |
| chr01 | E | 1q31 | 3 | 187000000 | 2747 | fs   | fs common |
| chr01 | E | 1q31 | 3 | 187000000 | 2219 | fs   | fs common |
| chr01 | E | 1q31 | 3 | 187000000 | 3047 | fs   | fs common |
| chr01 | E | 1q31 | 3 | 187000000 | 1995 | fs   | fs common |

|       |   |        |   |           |      |      |           |
|-------|---|--------|---|-----------|------|------|-----------|
| chr01 | E | 1q31   | 3 | 188000000 | 3005 | fs   | fs common |
| chr01 | E | 1q31   | 3 | 188000000 | 2836 | fs   | fs common |
| chr01 | E | 1q31   | 3 | 188000000 | 1891 | fs   | fs common |
| chr01 | E | 1q31   | 3 | 188000000 | 2650 | fs   | fs common |
| chr01 | E | 1q31   | 3 | 189000000 | 3082 | fs   | fs common |
| chr01 | E | 1q31   | 3 | 189000000 | 2295 | fs   | fs common |
| chr01 | E | 1q31   | 3 | 189000000 | 2648 | fs   | fs common |
| chr01 | E | 1q31   | 3 | 189000000 | 3354 | fs   | fs common |
| chr01 | E | 1q31   | 3 | 190000000 | 3127 | fs   | fs common |
| chr01 | E | 1q31   | 3 | 190000000 | 3181 | fs   | fs common |
| chr01 | E | 1q31   | 3 | 190000000 | 2627 | fs   | fs common |
| chr01 | E | 1q31   | 3 | 190000000 | 2440 | fs   | fs common |
| chr01 | E | 1q31   | 3 | 191000000 | 2576 | fs   | fs common |
| chr01 | E | 1q31   | 3 | 191000000 | 2278 | fs   | fs common |
| chr01 | E | 1q31   | 3 | 191000000 | 3982 | fs   | fs common |
| chr01 | E | 1q31   | 3 | 191000000 | 3155 | fs   | fs common |
| chr01 | E | 1q31   | 3 | 192000000 | 2140 | fs   | fs common |
| chr01 | E | 1q31   | 3 | 192000000 | 3314 | fs   | fs common |
| chr01 | E | 1q31   | 3 | 192000000 | 2346 | fs   | fs common |
| chr01 | E | 1q31   | 3 | 192000000 | 2916 | fs   | fs common |
| chr01 | E | 1q31   | 3 | 193000000 | 2662 | fs   | fs common |
| chr01 | E | 1q31   | 3 | 193000000 | 2335 | fs   | fs common |
| chr01 | E | 1q31   | 3 | 193000000 | 2675 | fs   | fs common |
| chr01 | E | 1q31   | 3 | 193000000 | 2762 | fs   | fs common |
| chr01 | E | 1q31   | 3 | 194000000 | 4181 | fs   | fs common |
| chr01 | E | 1q31   | 3 | 194000000 | 1782 | fs   | fs common |
| chr01 | E | 1q31   | 3 | 194000000 | 3547 | fs   | fs common |
| chr01 | E | 1q31   | 3 | 194000000 | 2474 | fs   | fs common |
| chr01 | E | 1q31   | 3 | 195000000 | 2771 | fs   | fs common |
| chr01 | E | 1q31   | 3 | 195000000 | 1460 | fs   | fs common |
| chr01 | E | 1q31   | 3 | 195000000 | 3199 | fs   | fs common |
| chr01 | E | 1q31   | 3 | 195000000 | 2528 | fs   | fs common |
| chr01 | E | 1q31   | 3 | 196000000 | 1648 | fs   | fs common |
| chr01 | E | 1q31   | 3 | 196000000 | 2731 | fs   | fs common |
| chr01 | E | 1q32.1 | 4 | 196000000 | 2006 | nofs | fs common |
| chr01 | E | 1q32.1 | 4 | 196000000 | 2633 | nofs | nofs      |

|       |   |        |   |           |       |      |      |
|-------|---|--------|---|-----------|-------|------|------|
| chr01 | E | 1q32.1 | 4 | 197000000 | 3879  | nofs | nofs |
| chr01 | E | 1q32.1 | 4 | 197000000 | 3750  | nofs | nofs |
| chr01 | E | 1q32.1 | 4 | 197000000 | 4854  | nofs | nofs |
| chr01 | E | 1q32.1 | 4 | 197000000 | 3460  | nofs | nofs |
| chr01 | E | 1q32.1 | 4 | 198000000 | 3992  | nofs | nofs |
| chr01 | E | 1q32.1 | 4 | 198000000 | 7758  | nofs | nofs |
| chr01 | E | 1q32.1 | 4 | 198000000 | 2548  | nofs | nofs |
| chr01 | E | 1q32.1 | 4 | 198000000 | 3795  | nofs | nofs |
| chr01 | E | 1q32.1 | 4 | 199000000 | 4402  | nofs | nofs |
| chr01 | E | 1q32.1 | 4 | 199000000 | 10305 | nofs | nofs |
| chr01 | E | 1q32.1 | 4 | 199000000 | 3382  | nofs | nofs |
| chr01 | E | 1q32.1 | 4 | 199000000 | 3291  | nofs | nofs |
| chr01 | E | 1q32.1 | 4 | 200000000 | 2927  | nofs | nofs |
| chr01 | E | 1q32.1 | 4 | 200000000 | 1976  | nofs | nofs |
| chr01 | E | 1q32.1 | 4 | 200000000 | 3884  | nofs | nofs |
| chr01 | E | 1q32.1 | 4 | 200000000 | 4737  | nofs | nofs |
| chr01 | E | 1q32.1 | 4 | 201000000 | 5293  | nofs | nofs |
| chr01 | E | 1q32.1 | 4 | 201000000 | 4458  | nofs | nofs |
| chr01 | E | 1q32.1 | 4 | 201000000 | 2407  | nofs | nofs |
| chr01 | E | 1q32.1 | 4 | 201000000 | 3083  | nofs | nofs |
| chr01 | E | 1q32.1 | 4 | 202000000 | 1983  | nofs | nofs |
| chr01 | E | 1q32.1 | 4 | 202000000 | 3281  | nofs | nofs |
| chr01 | E | 1q32.1 | 4 | 202000000 | 2500  | nofs | nofs |
| chr01 | E | 1q32.1 | 4 | 202000000 | 2850  | nofs | nofs |
| chr01 | E | 1q32.1 | 4 | 203000000 | 2565  | nofs | nofs |
| chr01 | E | 1q32.1 | 4 | 203000000 | 3062  | nofs | nofs |
| chr01 | E | 1q32.1 | 4 | 203000000 | 5193  | nofs | nofs |
| chr01 | E | 1q32.1 | 4 | 203000000 | 3787  | nofs | nofs |
| chr01 | E | 1q32.1 | 4 | 204000000 | 2553  | nofs | nofs |
| chr01 | E | 1q32.2 | 6 | 204000000 | 3595  | nofs | nofs |
| chr01 | E | 1q32.2 | 6 | 204000000 | 2797  | nofs | nofs |
| chr01 | E | 1q32.2 | 6 | 204000000 | 1487  | nofs | nofs |
| chr01 | E | 1q32.2 | 6 | 205000000 | 1777  | nofs | nofs |
| chr01 | E | 1q32.2 | 6 | 205000000 | 2174  | nofs | nofs |
| chr01 | E | 1q32.2 | 6 | 205000000 | 2478  | nofs | nofs |
| chr01 | E | 1q32.2 | 6 | 205000000 | 3302  | nofs | nofs |

|       |   |        |   |           |      |      |      |
|-------|---|--------|---|-----------|------|------|------|
| chr01 | E | 1q32.2 | 6 | 206000000 | 2848 | nofs | nofs |
| chr01 | E | 1q32.2 | 6 | 206000000 | 1944 | nofs | nofs |
| chr01 | E | 1q32.2 | 6 | 206000000 | 2204 | nofs | nofs |
| chr01 | E | 1q32.2 | 6 | 206000000 | 3791 | nofs | nofs |
| chr01 | E | 1q32.2 | 6 | 207000000 | 1718 | nofs | nofs |
| chr01 | E | 1q32.2 | 6 | 207000000 | 2412 | nofs | nofs |
| chr01 | E | 1q32.2 | 6 | 207000000 | 1800 | nofs | nofs |
| chr01 | E | 1q32.2 | 6 | 207000000 | 2412 | nofs | nofs |
| chr01 | E | 1q32.2 | 6 | 208000000 | 3687 | nofs | nofs |
| chr01 | E | 1q32.2 | 6 | 208000000 | 3223 | nofs | nofs |
| chr01 | E | 1q32.3 | 1 | 208000000 | 4210 | nofs | nofs |
| chr01 | E | 1q32.3 | 1 | 208000000 | 4494 | nofs | nofs |
| chr01 | E | 1q32.3 | 1 | 209000000 | 2766 | nofs | nofs |
| chr01 | E | 1q32.3 | 1 | 209000000 | 5226 | nofs | nofs |
| chr01 | E | 1q32.3 | 1 | 209000000 | 2344 | nofs | nofs |
| chr01 | E | 1q32.3 | 1 | 209000000 | 5937 | nofs | nofs |
| chr01 | E | 1q32.3 | 1 | 210000000 | 4288 | nofs | nofs |
| chr01 | E | 1q32.3 | 1 | 210000000 | 1883 | nofs | nofs |
| chr01 | E | 1q32.3 | 1 | 210000000 | 1209 | nofs | nofs |
| chr01 | E | 1q32.3 | 1 | 210000000 | 2103 | nofs | nofs |
| chr01 | E | 1q32.3 | 1 | 211000000 | 2588 | nofs | nofs |
| chr01 | E | 1q32.3 | 1 | 211000000 | 1876 | nofs | nofs |
| chr01 | E | 1q41   | 1 | 211000000 | 3317 | nofs | nofs |
| chr01 | E | 1q41   | 1 | 211000000 | 3817 | nofs | nofs |
| chr01 | E | 1q41   | 1 | 212000000 | 2186 | nofs | nofs |
| chr01 | E | 1q41   | 1 | 212000000 | 3803 | nofs | nofs |
| chr01 | E | 1q41   | 1 | 212000000 | 2097 | nofs | nofs |
| chr01 | E | 1q41   | 1 | 212000000 | 1965 | nofs | nofs |
| chr01 | E | 1q41   | 1 | 213000000 | 2633 | nofs | nofs |
| chr01 | E | 1q41   | 1 | 213000000 | 1690 | nofs | nofs |
| chr01 | E | 1q41   | 1 | 213000000 | 1550 | nofs | nofs |
| chr01 | E | 1q41   | 1 | 213000000 | 2613 | nofs | nofs |
| chr01 | E | 1q41   | 1 | 214000000 | 1994 | nofs | nofs |
| chr01 | E | 1q41   | 1 | 214000000 | 1346 | nofs | nofs |
| chr01 | E | 1q41   | 1 | 214000000 | 2290 | nofs | nofs |
| chr01 | E | 1q41   | 1 | 214000000 | 2072 | nofs | nofs |



|       |   |        |   |           |       |      |           |
|-------|---|--------|---|-----------|-------|------|-----------|
| chr01 | E | 1q41   | 1 | 215000000 | 1364  | nofs | nofs      |
| chr01 | E | 1q41   | 1 | 215000000 | 2173  | nofs | nofs      |
| chr01 | E | 1q41   | 1 | 215000000 | 2935  | nofs | nofs      |
| chr01 | E | 1q41   | 1 | 215000000 | 2616  | nofs | nofs      |
| chr01 | E | 1q41   | 1 | 216000000 | 1614  | nofs | nofs      |
| chr01 | E | 1q41   | 1 | 216000000 | 1889  | nofs | nofs      |
| chr01 | E | 1q41   | 1 | 216000000 | 3166  | nofs | nofs      |
| chr01 | E | 1q41   | 1 | 216000000 | 2384  | nofs | nofs      |
| chr01 | E | 1q41   | 1 | 217000000 | 3403  | nofs | nofs      |
| chr01 | E | 1q41   | 1 | 217000000 | 1997  | nofs | nofs      |
| chr01 | E | 1q41   | 1 | 217000000 | 3801  | nofs | nofs      |
| chr01 | E | 1q41   | 1 | 217000000 | 1682  | nofs | nofs      |
| chr01 | E | 1q41   | 1 | 218000000 | 3672  | nofs | nofs      |
| chr01 | E | 1q41   | 1 | 218000000 | 2116  | nofs | nofs      |
| chr01 | E | 1q41   | 1 | 218000000 | 2571  | nofs | nofs      |
| chr01 | E | 1q41   | 1 | 218000000 | 2597  | nofs | nofs      |
| chr01 | E | 1q41   | 1 | 219000000 | 4126  | nofs | nofs      |
| chr01 | E | 1q41   | 1 | 219000000 | 1665  | nofs | nofs      |
| chr01 | E | 1q41   | 1 | 219000000 | 4391  | nofs | nofs      |
| chr01 | E | 1q41   | 1 | 219000000 | 2107  | nofs | nofs      |
| chr01 | E | 1q41   | 1 | 220000000 | 3201  | nofs | nofs      |
| chr01 | E | 1q42.1 | 6 | 220000000 | 2519  | fs   | fs common |
| chr01 | E | 1q42.1 | 6 | 220000000 | 3348  | fs   | fs common |
| chr01 | E | 1q42.1 | 6 | 220000000 | 4060  | fs   | fs common |
| chr01 | E | 1q42.1 | 6 | 221000000 | 10431 | fs   | fs common |
| chr01 | E | 1q42.1 | 6 | 221000000 | 4009  | fs   | fs common |
| chr01 | E | 1q42.1 | 6 | 221000000 | 5236  | fs   | fs common |
| chr01 | E | 1q42.1 | 6 | 221000000 | 1787  | fs   | fs common |
| chr01 | E | 1q42.1 | 6 | 222000000 | 1603  | fs   | fs common |
| chr01 | E | 1q42.1 | 6 | 222000000 | 3402  | fs   | fs common |
| chr01 | E | 1q42.1 | 6 | 222000000 | 3295  | fs   | fs common |
| chr01 | E | 1q42.1 | 6 | 222000000 | 4890  | fs   | fs common |
| chr01 | E | 1q42.1 | 6 | 223000000 | 3544  | fs   | fs common |
| chr01 | E | 1q42.1 | 6 | 223000000 | 2225  | fs   | fs common |
| chr01 | E | 1q42.1 | 6 | 223000000 | 2881  | fs   | fs common |
| chr01 | E | 1q42.1 | 6 | 223000000 | 6392  | fs   | fs common |

|       |   |        |   |           |       |    |           |
|-------|---|--------|---|-----------|-------|----|-----------|
| chr01 | E | 1q42.1 | 6 | 224000000 | 2821  | fs | fs common |
| chr01 | E | 1q42.1 | 6 | 224000000 | 3336  | fs | fs common |
| chr01 | E | 1q42.1 | 6 | 224000000 | 5426  | fs | fs common |
| chr01 | E | 1q42.1 | 6 | 224000000 | 8934  | fs | fs common |
| chr01 | E | 1q42.1 | 6 | 225000000 | 9229  | fs | fs common |
| chr01 | E | 1q42.1 | 6 | 225000000 | 6092  | fs | fs common |
| chr01 | E | 1q42.1 | 6 | 225000000 | 26869 | fs | fs common |
| chr01 | E | 1q42.1 | 6 | 225000000 | 2595  | fs | fs common |
| chr01 | E | 1q42.1 | 6 | 226000000 | 4185  | fs | fs common |
| chr01 | E | 1q42.1 | 6 | 226000000 | 2323  | fs | fs common |
| chr01 | E | 1q42.1 | 6 | 226000000 | 4256  | fs | fs common |
| chr01 | E | 1q42.1 | 6 | 226000000 | 3683  | fs | fs common |
| chr01 | E | 1q42.1 | 6 | 227000000 | 4348  | fs | fs common |
| chr01 | E | 1q42.1 | 6 | 227000000 | 5341  | fs | fs common |
| chr01 | B | 1q42.2 | . | 227000000 | 3785  | fs | fs common |
| chr01 | B | 1q42.2 | . | 227000000 | 4308  | fs | fs common |
| chr01 | B | 1q42.2 | . | 228000000 | 3959  | fs | fs common |
| chr01 | B | 1q42.2 | . | 228000000 | 2452  | fs | fs common |
| chr01 | B | 1q42.2 | . | 228000000 | 3181  | fs | fs common |
| chr01 | B | 1q42.2 | . | 228000000 | 2741  | fs | fs common |
| chr01 | B | 1q42.2 | . | 229000000 | 3013  | fs | fs common |
| chr01 | B | 1q42.2 | . | 229000000 | 3802  | fs | fs common |
| chr01 | B | 1q42.2 | . | 229000000 | 9335  | fs | fs common |
| chr01 | B | 1q42.2 | . | 229000000 | 2308  | fs | fs common |
| chr01 | B | 1q42.2 | . | 230000000 | 2930  | fs | fs common |
| chr01 | B | 1q42.2 | . | 230000000 | 2190  | fs | fs common |
| chr01 | B | 1q42.2 | . | 230000000 | 3723  | fs | fs common |
| chr01 | B | 1q42.2 | . | 230000000 | 2748  | fs | fs common |
| chr01 | B | 1q42.2 | . | 231000000 | 6939  | fs | fs common |
| chr01 | B | 1q42.2 | . | 231000000 | 4156  | fs | fs common |
| chr01 | E | 1q42.3 | 3 | 231000000 | 3551  | fs | fs common |
| chr01 | E | 1q42.3 | 3 | 231000000 | 3952  | fs | fs common |
| chr01 | E | 1q42.3 | 3 | 232000000 | 3863  | fs | fs common |
| chr01 | E | 1q42.3 | 3 | 232000000 | 6018  | fs | fs common |
| chr01 | E | 1q42.3 | 3 | 232000000 | 2949  | fs | fs common |
| chr01 | E | 1q42.3 | 3 | 232000000 | 3491  | fs | fs common |

|       |   |        |   |           |      |      |           |
|-------|---|--------|---|-----------|------|------|-----------|
| chr01 | E | 1q42.3 | 3 | 233000000 | 5605 | fs   | fs common |
| chr01 | E | 1q42.3 | 3 | 233000000 | 4382 | fs   | fs common |
| chr01 | E | 1q43   | 4 | 233000000 | 6499 | nofs | nofs      |
| chr01 | E | 1q43   | 4 | 233000000 | 2958 | nofs | nofs      |
| chr01 | E | 1q43   | 4 | 234000000 | 4658 | nofs | nofs      |
| chr01 | E | 1q43   | 4 | 234000000 | 3673 | nofs | nofs      |
| chr01 | E | 1q43   | 4 | 234000000 | 3941 | nofs | nofs      |
| chr01 | E | 1q43   | 4 | 234000000 | 2881 | nofs | nofs      |
| chr01 | E | 1q43   | 4 | 235000000 | 2347 | nofs | nofs      |
| chr01 | E | 1q43   | 4 | 235000000 | 4282 | nofs | nofs      |
| chr01 | E | 1q43   | 4 | 235000000 | 3861 | nofs | nofs      |
| chr01 | E | 1q43   | 4 | 235000000 | 3011 | nofs | nofs      |
| chr01 | E | 1q43   | 4 | 236000000 | 3027 | nofs | nofs      |
| chr01 | E | 1q43   | 4 | 236000000 | 2501 | nofs | nofs      |
| chr01 | E | 1q43   | 4 | 236000000 | 4647 | nofs | nofs      |
| chr01 | E | 1q43   | 4 | 236000000 | 3761 | nofs | nofs      |
| chr01 | E | 1q43   | 4 | 237000000 | 3851 | nofs | nofs      |
| chr01 | E | 1q43   | 4 | 237000000 | 2493 | nofs | nofs      |
| chr01 | E | 1q43   | 4 | 237000000 | 3267 | nofs | nofs      |
| chr01 | E | 1q43   | 4 | 237000000 | 3621 | nofs | nofs      |
| chr01 | E | 1q43   | 4 | 238000000 | 3775 | nofs | nofs      |
| chr01 | E | 1q43   | 4 | 238000000 | 2364 | nofs | nofs      |
| chr01 | E | 1q43   | 4 | 238000000 | 3267 | nofs | nofs      |
| chr01 | E | 1q43   | 4 | 238000000 | 3615 | nofs | nofs      |
| chr01 | E | 1q43   | 4 | 239000000 | 3738 | nofs | nofs      |
| chr01 | E | 1q43   | 4 | 239000000 | 3578 | nofs | nofs      |
| chr01 | E | 1q43   | 4 | 239000000 | 3638 | nofs | nofs      |
| chr01 | E | 1q43   | 4 | 239000000 | 2914 | nofs | nofs      |
| chr01 | E | 1q43   | 4 | 240000000 | 4127 | nofs | nofs      |
| chr01 | E | 1q44   | 2 | 240000000 | 4085 | fs   | fs common |
| chr01 | E | 1q44   | 2 | 240000000 | 1808 | fs   | fs common |
| chr01 | E | 1q44   | 2 | 240000000 | 2978 | fs   | fs common |
| chr01 | E | 1q44   | 2 | 241000000 | 2795 | fs   | fs common |
| chr01 | E | 1q44   | 2 | 241000000 | 5423 | fs   | fs common |
| chr01 | E | 1q44   | 2 | 241000000 | 2717 | fs   | fs common |
| chr01 | E | 1q44   | 2 | 241000000 | 4257 | fs   | fs common |

|       |   |        |   |           |       |      |           |
|-------|---|--------|---|-----------|-------|------|-----------|
| chr01 | E | 1q44   | 2 | 242000000 | 3797  | fs   | fs common |
| chr01 | E | 1q44   | 2 | 242000000 | 8131  | fs   | fs common |
| chr01 | T | 1q44   | 2 | 242000000 | 7025  | fs   | fs common |
| chr01 | T | 1q44   | 2 | 242000000 | 7554  | fs   | fs common |
| chr01 | T | 1q44   | 2 | 243000000 | 8620  | fs   | fs common |
| chr01 | T | 1q44   | 2 | 243000000 | 12492 | fs   | fs common |
| chr01 | T | 1q44   | 2 | 243000000 | 7988  | fs   | fs common |
| chr01 | T | 1q44   | 2 | 243000000 | 7957  | fs   | fs common |
| chr01 | T | 1q44   | 2 | 244000000 | 10157 | fs   | fs common |
| chr01 | T | 1q44   | 2 | 244000000 | 7995  | fs   | fs common |
| chr01 | T | 1q44   | 2 | 244000000 | 3753  | fs   | fs common |
| chr01 | T | 1q44   | 2 | 244000000 | 4474  | fs   | fs common |
| chr01 | T | 1q44   | 2 | 245000000 | 4306  | fs   | fs common |
| chr01 | T | 1q44   | 2 | 245000000 | 5529  | fs   | fs common |
| chr01 | T | 1q44   | 2 | 245000000 | 5455  | fs   | fs common |
| chr02 | T | 2p25.3 | 2 | 125000    | 10555 | nofs | nofs      |
| chr02 | T | 2p25.3 | 2 | 375000    | 23974 | nofs | nofs      |
| chr02 | T | 2p25.3 | 2 | 625000    | 16623 | nofs | nofs      |
| chr02 | T | 2p25.3 | 2 | 875000    | 25693 | nofs | nofs      |
| chr02 | T | 2p25.3 | 2 | 1125000   | 23321 | nofs | nofs      |
| chr02 | T | 2p25.3 | 2 | 1375000   | 28119 | nofs | nofs      |
| chr02 | T | 2p25.3 | 2 | 1625000   | 37144 | nofs | nofs      |
| chr02 | T | 2p25.3 | 2 | 1875000   | 15891 | nofs | nofs      |
| chr02 | T | 2p25.3 | 2 | 2125000   | 14222 | nofs | nofs      |
| chr02 | T | 2p25.3 | 2 | 2375000   | 6696  | nofs | nofs      |
| chr02 | T | 2p25.3 | 2 | 2625000   | 15286 | nofs | nofs      |
| chr02 | T | 2p25.3 | 2 | 2875000   | 14254 | nofs | nofs      |
| chr02 | T | 2p25.3 | 2 | 3125000   | 11598 | nofs | nofs      |
| chr02 | E | 2p25.3 | 2 | 3375000   | 6600  | nofs | nofs      |
| chr02 | E | 2p25.3 | 2 | 3625000   | 4640  | nofs | nofs      |
| chr02 | E | 2p25.3 | 2 | 3875000   | 5609  | nofs | nofs      |
| chr02 | B | 2p25.2 | . | 4125000   | 3574  | nofs | nofs      |
| chr02 | B | 2p25.2 | . | 4375000   | 2590  | nofs | nofs      |
| chr02 | B | 2p25.2 | . | 4625000   | 9026  | nofs | nofs      |
| chr02 | B | 2p25.2 | . | 4875000   | 25059 | nofs | nofs      |
| chr02 | B | 2p25.2 | . | 5125000   | 4708  | nofs | nofs      |

|       |   |        |   |          |      |      |      |
|-------|---|--------|---|----------|------|------|------|
| chr02 | B | 2p25.2 | . | 5375000  | 4755 | nofs | nofs |
| chr02 | B | 2p25.2 | . | 5625000  | 4340 | nofs | nofs |
| chr02 | B | 2p25.2 | . | 5875000  | 4671 | nofs | nofs |
| chr02 | B | 2p25.2 | . | 6125000  | 2929 | nofs | nofs |
| chr02 | B | 2p25.2 | . | 6375000  | 4601 | nofs | nofs |
| chr02 | B | 2p25.2 | . | 6625000  | 3778 | nofs | nofs |
| chr02 | B | 2p25.2 | . | 6875000  | 3949 | nofs | nofs |
| chr02 | B | 2p25.2 | . | 7125000  | 5841 | nofs | nofs |
| chr02 | B | 2p25.1 | . | 7375000  | 4411 | nofs | nofs |
| chr02 | B | 2p25.1 | . | 7625000  | 4099 | nofs | nofs |
| chr02 | B | 2p25.1 | . | 7875000  | 4155 | nofs | nofs |
| chr02 | B | 2p25.1 | . | 8125000  | 3315 | nofs | nofs |
| chr02 | B | 2p25.1 | . | 8375000  | 3370 | nofs | nofs |
| chr02 | B | 2p25.1 | . | 8625000  | 4072 | nofs | nofs |
| chr02 | B | 2p25.1 | . | 8875000  | 3986 | nofs | nofs |
| chr02 | B | 2p25.1 | . | 9125000  | 3843 | nofs | nofs |
| chr02 | B | 2p25.1 | . | 9375000  | 4176 | nofs | nofs |
| chr02 | B | 2p25.1 | . | 9625000  | 3167 | nofs | nofs |
| chr02 | B | 2p25.1 | . | 9875000  | 3387 | nofs | nofs |
| chr02 | B | 2p25.1 | . | 10125000 | 8257 | nofs | nofs |
| chr02 | B | 2p25.1 | . | 10375000 | 7542 | nofs | nofs |
| chr02 | B | 2p25.1 | . | 10625000 | 7895 | nofs | nofs |
| chr02 | B | 2p25.1 | . | 10875000 | 4915 | nofs | nofs |
| chr02 | B | 2p25.1 | . | 11125000 | 7634 | nofs | nofs |
| chr02 | B | 2p25.1 | . | 11375000 | 4184 | nofs | nofs |
| chr02 | B | 2p25.1 | . | 11625000 | 3612 | nofs | nofs |
| chr02 | B | 2p25.1 | . | 11875000 | 3866 | nofs | nofs |
| chr02 | B | 2p25.1 | . | 12125000 | 3792 | nofs | nofs |
| chr02 | B | 2p24.3 | . | 12375000 | 2207 | nofs | nofs |
| chr02 | B | 2p24.3 | . | 12625000 | 3713 | nofs | nofs |
| chr02 | B | 2p24.3 | . | 12875000 | 3253 | nofs | nofs |
| chr02 | B | 2p24.3 | . | 13125000 | 2671 | nofs | nofs |
| chr02 | B | 2p24.3 | . | 13375000 | 4509 | nofs | nofs |
| chr02 | B | 2p24.3 | . | 13625000 | 3071 | nofs | nofs |
| chr02 | B | 2p24.3 | . | 13875000 | 2088 | nofs | nofs |
| chr02 | B | 2p24.3 | . | 14125000 | 4201 | nofs | nofs |

|       |   |        |   |          |      |           |           |
|-------|---|--------|---|----------|------|-----------|-----------|
| chr02 | B | 2p24.3 | . | 14375000 | 2640 | nofs      | nofs      |
| chr02 | B | 2p24.3 | . | 14625000 | 1740 | nofs      | nofs      |
| chr02 | B | 2p24.3 | . | 14875000 | 2169 | nofs      | nofs      |
| chr02 | B | 2p24.3 | . | 15125000 | 3257 | nofs      | nofs      |
| chr02 | B | 2p24.3 | . | 15375000 | 2184 | nofs      | nofs      |
| chr02 | B | 2p24.3 | . | 15625000 | 3682 | nofs      | nofs      |
| chr02 | B | 2p24.3 | . | 15875000 | 3230 | nofs      | nofs      |
| chr02 | B | 2p24.3 | . | 16125000 | 5678 | nofs      | nofs      |
| chr02 | B | 2p24.3 | . | 16375000 | 3026 | nofs      | nofs      |
| chr02 | B | 2p24.3 | . | 16625000 | 1107 | nofs      | nofs      |
| chr02 | B | 2p24.2 | . | 16875000 | 2388 | fs common | fs common |
| chr02 | B | 2p24.2 | . | 17125000 | 1785 | fs common | fs common |
| chr02 | B | 2p24.2 | . | 17375000 | 2367 | fs common | fs common |
| chr02 | B | 2p24.2 | . | 17625000 | 2025 | fs common | fs common |
| chr02 | B | 2p24.2 | . | 17875000 | 2993 | fs common | fs common |
| chr02 | B | 2p24.2 | . | 18125000 | 2914 | fs common | fs common |
| chr02 | B | 2p24.2 | . | 18375000 | 4381 | fs common | fs common |
| chr02 | B | 2p24.2 | . | 18625000 | 1714 | fs common | fs common |
| chr02 | B | 2p24.2 | . | 18875000 | 3558 | fs common | fs common |
| chr02 | B | 2p24.2 | . | 19125000 | 2370 | fs common | fs common |
| chr02 | B | 2p24.2 | . | 19375000 | 1979 | fs common | fs common |
| chr02 | B | 2p24.1 | . | 19625000 | 2650 | nofs      | nofs      |
| chr02 | B | 2p24.1 | . | 19875000 | 2466 | nofs      | nofs      |
| chr02 | B | 2p24.1 | . | 20125000 | 3066 | nofs      | nofs      |
| chr02 | B | 2p24.1 | . | 20375000 | 4037 | nofs      | nofs      |
| chr02 | B | 2p24.1 | . | 20625000 | 2420 | nofs      | nofs      |
| chr02 | B | 2p24.1 | . | 20875000 | 2110 | nofs      | nofs      |
| chr02 | B | 2p24.1 | . | 21125000 | 2673 | nofs      | nofs      |
| chr02 | B | 2p24.1 | . | 21375000 | 2746 | nofs      | nofs      |
| chr02 | B | 2p24.1 | . | 21625000 | 2630 | nofs      | nofs      |
| chr02 | B | 2p24.1 | . | 21875000 | 1219 | nofs      | nofs      |
| chr02 | B | 2p24.1 | . | 22125000 | 2725 | nofs      | nofs      |
| chr02 | B | 2p24.1 | . | 22375000 | 2242 | nofs      | nofs      |
| chr02 | B | 2p24.1 | . | 22625000 | 2160 | nofs      | nofs      |
| chr02 | B | 2p24.1 | . | 22875000 | 2237 | nofs      | nofs      |
| chr02 | B | 2p24.1 | . | 23125000 | 2072 | nofs      | nofs      |

|       |   |        |   |          |      |      |      |
|-------|---|--------|---|----------|------|------|------|
| chr02 | B | 2p24.1 | . | 23375000 | 2516 | nofs | nofs |
| chr02 | B | 2p24.1 | . | 23625000 | 3565 | nofs | nofs |
| chr02 | E | 2p23   | 3 | 23875000 | 2898 | nofs | nofs |
| chr02 | E | 2p23   | 3 | 24125000 | 3264 | nofs | nofs |
| chr02 | E | 2p23   | 3 | 24375000 | 4028 | nofs | nofs |
| chr02 | E | 2p23   | 3 | 24625000 | 2842 | nofs | nofs |
| chr02 | E | 2p23   | 3 | 24875000 | 2498 | nofs | nofs |
| chr02 | E | 2p23   | 3 | 25125000 | 2494 | nofs | nofs |
| chr02 | E | 2p23   | 3 | 25375000 | 3704 | nofs | nofs |
| chr02 | E | 2p23   | 3 | 25625000 | 4476 | nofs | nofs |
| chr02 | E | 2p23   | 3 | 25875000 | 4905 | nofs | nofs |
| chr02 | E | 2p23   | 3 | 26125000 | 6651 | nofs | nofs |
| chr02 | E | 2p23   | 3 | 26375000 | 1899 | nofs | nofs |
| chr02 | E | 2p23   | 3 | 26625000 | 5450 | nofs | nofs |
| chr02 | E | 2p23   | 3 | 26875000 | 3009 | nofs | nofs |
| chr02 | E | 2p23   | 3 | 27125000 | 2393 | nofs | nofs |
| chr02 | E | 2p23   | 3 | 27375000 | 2572 | nofs | nofs |
| chr02 | E | 2p23   | 3 | 27625000 | 8147 | nofs | nofs |
| chr02 | E | 2p23   | 3 | 27875000 | 3573 | nofs | nofs |
| chr02 | E | 2p23   | 3 | 28125000 | 2525 | nofs | nofs |
| chr02 | E | 2p23   | 3 | 28375000 | 1976 | nofs | nofs |
| chr02 | E | 2p23   | 3 | 28625000 | 4258 | nofs | nofs |
| chr02 | E | 2p23   | 3 | 28875000 | 1940 | nofs | nofs |
| chr02 | E | 2p23   | 3 | 29125000 | 4371 | nofs | nofs |
| chr02 | E | 2p23   | 3 | 29375000 | 4097 | nofs | nofs |
| chr02 | E | 2p23   | 3 | 29625000 | 1353 | nofs | nofs |
| chr02 | E | 2p23   | 3 | 29875000 | 2935 | nofs | nofs |
| chr02 | E | 2p23   | 3 | 30125000 | 3075 | nofs | nofs |
| chr02 | E | 2p23   | 3 | 30375000 | 3020 | nofs | nofs |
| chr02 | E | 2p23   | 3 | 30625000 | 2954 | nofs | nofs |
| chr02 | E | 2p23   | 3 | 30875000 | 1815 | nofs | nofs |
| chr02 | E | 2p23   | 3 | 31125000 | 2532 | nofs | nofs |
| chr02 | E | 2p23   | 3 | 31375000 | 2584 | nofs | nofs |
| chr02 | E | 2p23   | 3 | 31625000 | 2055 | nofs | nofs |
| chr02 | E | 2p23   | 3 | 31875000 | 3477 | nofs | nofs |
| chr02 | E | 2p22   | 4 | 32125000 | 6459 | nofs | nofs |

|       |   |      |   |          |      |      |      |
|-------|---|------|---|----------|------|------|------|
| chr02 | E | 2p22 | 4 | 32375000 | 5596 | nofs | nofs |
| chr02 | E | 2p22 | 4 | 32625000 | 3418 | nofs | nofs |
| chr02 | E | 2p22 | 4 | 32875000 | 2935 | nofs | nofs |
| chr02 | E | 2p22 | 4 | 33125000 | 6063 | nofs | nofs |
| chr02 | E | 2p22 | 4 | 33375000 | 2181 | nofs | nofs |
| chr02 | E | 2p22 | 4 | 33625000 | 1829 | nofs | nofs |
| chr02 | E | 2p22 | 4 | 33875000 | 4468 | nofs | nofs |
| chr02 | E | 2p22 | 4 | 34125000 | 3848 | nofs | nofs |
| chr02 | E | 2p22 | 4 | 34375000 | 3030 | nofs | nofs |
| chr02 | E | 2p22 | 4 | 34625000 | 2875 | nofs | nofs |
| chr02 | E | 2p22 | 4 | 34875000 | 4952 | nofs | nofs |
| chr02 | E | 2p22 | 4 | 35125000 | 2487 | nofs | nofs |
| chr02 | E | 2p22 | 4 | 35375000 | 1046 | nofs | nofs |
| chr02 | E | 2p22 | 4 | 35625000 | 2392 | nofs | nofs |
| chr02 | E | 2p22 | 4 | 35875000 | 3287 | nofs | nofs |
| chr02 | E | 2p22 | 4 | 36125000 | 5370 | nofs | nofs |
| chr02 | E | 2p22 | 4 | 36375000 | 5807 | nofs | nofs |
| chr02 | E | 2p22 | 4 | 36625000 | 2151 | nofs | nofs |
| chr02 | E | 2p22 | 4 | 36875000 | 2219 | nofs | nofs |
| chr02 | E | 2p22 | 4 | 37125000 | 2066 | nofs | nofs |
| chr02 | E | 2p22 | 4 | 37375000 | 2617 | nofs | nofs |
| chr02 | E | 2p22 | 4 | 37625000 | 3338 | nofs | nofs |
| chr02 | E | 2p22 | 4 | 37875000 | 1555 | nofs | nofs |
| chr02 | E | 2p22 | 4 | 38125000 | 3650 | nofs | nofs |
| chr02 | E | 2p22 | 4 | 38375000 | 2399 | nofs | nofs |
| chr02 | E | 2p22 | 4 | 38625000 | 3539 | nofs | nofs |
| chr02 | E | 2p22 | 4 | 38875000 | 5365 | nofs | nofs |
| chr02 | E | 2p22 | 4 | 39125000 | 1845 | nofs | nofs |
| chr02 | E | 2p22 | 4 | 39375000 | 3430 | nofs | nofs |
| chr02 | E | 2p22 | 4 | 39625000 | 2098 | nofs | nofs |
| chr02 | E | 2p22 | 4 | 39875000 | 2723 | nofs | nofs |
| chr02 | E | 2p22 | 4 | 40125000 | 1981 | nofs | nofs |
| chr02 | E | 2p22 | 4 | 40375000 | 2314 | nofs | nofs |
| chr02 | E | 2p22 | 4 | 40625000 | 2139 | nofs | nofs |
| chr02 | E | 2p22 | 4 | 40875000 | 2857 | nofs | nofs |
| chr02 | E | 2p22 | 4 | 41125000 | 1745 | nofs | nofs |



|       |   |      |   |          |       |      |      |
|-------|---|------|---|----------|-------|------|------|
| chr02 | E | 2p22 | 4 | 41375000 | 1696  | nofs | nofs |
| chr02 | E | 2p22 | 4 | 41625000 | 1481  | nofs | nofs |
| chr02 | E | 2p22 | 4 | 41875000 | 4317  | nofs | nofs |
| chr02 | E | 2p21 | 2 | 42125000 | 4563  | nofs | nofs |
| chr02 | E | 2p21 | 2 | 42375000 | 2285  | nofs | nofs |
| chr02 | E | 2p21 | 2 | 42625000 | 6684  | nofs | nofs |
| chr02 | E | 2p21 | 2 | 42875000 | 2339  | nofs | nofs |
| chr02 | E | 2p21 | 2 | 43125000 | 3245  | nofs | nofs |
| chr02 | E | 2p21 | 2 | 43375000 | 4462  | nofs | nofs |
| chr02 | E | 2p21 | 2 | 43625000 | 3292  | nofs | nofs |
| chr02 | E | 2p21 | 2 | 43875000 | 8980  | nofs | nofs |
| chr02 | E | 2p21 | 2 | 44125000 | 13350 | nofs | nofs |
| chr02 | E | 2p21 | 2 | 44375000 | 3100  | nofs | nofs |
| chr02 | E | 2p21 | 2 | 44625000 | 3129  | nofs | nofs |
| chr02 | E | 2p21 | 2 | 44875000 | 1130  | nofs | nofs |
| chr02 | E | 2p21 | 2 | 45125000 | 2682  | nofs | nofs |
| chr02 | E | 2p21 | 2 | 45375000 | 4432  | nofs | nofs |
| chr02 | E | 2p21 | 2 | 45625000 | 3449  | nofs | nofs |
| chr02 | E | 2p21 | 2 | 45875000 | 2251  | nofs | nofs |
| chr02 | E | 2p21 | 2 | 46125000 | 2247  | nofs | nofs |
| chr02 | E | 2p21 | 2 | 46375000 | 2889  | nofs | nofs |
| chr02 | E | 2p21 | 2 | 46625000 | 1955  | nofs | nofs |
| chr02 | E | 2p21 | 2 | 46875000 | 2178  | nofs | nofs |
| chr02 | E | 2p21 | 2 | 47125000 | 5045  | nofs | nofs |
| chr02 | E | 2p21 | 2 | 47375000 | 3576  | nofs | nofs |
| chr02 | E | 2p21 | 2 | 47625000 | 5353  | nofs | nofs |
| chr02 | E | 2p16 | 3 | 47875000 | 2414  | nofs | nofs |
| chr02 | E | 2p16 | 3 | 48125000 | 3920  | nofs | nofs |
| chr02 | E | 2p16 | 3 | 48375000 | 2170  | nofs | nofs |
| chr02 | E | 2p16 | 3 | 48625000 | 5295  | nofs | nofs |
| chr02 | E | 2p16 | 3 | 48875000 | 2593  | nofs | nofs |
| chr02 | E | 2p16 | 3 | 49125000 | 2440  | nofs | nofs |
| chr02 | E | 2p16 | 3 | 49375000 | 2060  | nofs | nofs |
| chr02 | E | 2p16 | 3 | 49625000 | 1780  | nofs | nofs |
| chr02 | E | 2p16 | 3 | 49875000 | 1708  | nofs | nofs |
| chr02 | E | 2p16 | 3 | 50125000 | 2593  | nofs | nofs |

|       |   |      |   |          |      |      |           |
|-------|---|------|---|----------|------|------|-----------|
| chr02 | E | 2p16 | 3 | 50375000 | 2282 | nofs | nofs      |
| chr02 | E | 2p16 | 3 | 50625000 | 3331 | nofs | nofs      |
| chr02 | E | 2p16 | 3 | 50875000 | 2344 | nofs | nofs      |
| chr02 | E | 2p16 | 3 | 51125000 | 1461 | nofs | nofs      |
| chr02 | E | 2p16 | 3 | 51375000 | 3101 | nofs | nofs      |
| chr02 | E | 2p16 | 3 | 51625000 | 3822 | nofs | nofs      |
| chr02 | E | 2p16 | 3 | 51875000 | 2999 | nofs | nofs      |
| chr02 | E | 2p16 | 3 | 52125000 | 1531 | nofs | nofs      |
| chr02 | E | 2p16 | 3 | 52375000 | 1694 | nofs | nofs      |
| chr02 | E | 2p16 | 3 | 52625000 | 1835 | nofs | nofs      |
| chr02 | E | 2p16 | 3 | 52875000 | 1980 | fs   | fs common |
| chr02 | E | 2p16 | 3 | 53125000 | 3729 | fs   | fs common |
| chr02 | E | 2p16 | 3 | 53375000 | 2722 | fs   | fs common |
| chr02 | E | 2p16 | 3 | 53625000 | 2175 | fs   | fs common |
| chr02 | E | 2p16 | 3 | 53875000 | 2272 | fs   | fs common |
| chr02 | E | 2p16 | 3 | 54125000 | 5282 | fs   | fs common |
| chr02 | E | 2p16 | 3 | 54375000 | 2420 | fs   | fs common |
| chr02 | E | 2p16 | 3 | 54625000 | 2518 | fs   | fs common |
| chr02 | E | 2p16 | 3 | 54875000 | 2141 | fs   | fs common |
| chr02 | E | 2p16 | 3 | 55125000 | 1973 | nofs | nofs      |
| chr02 | E | 2p16 | 3 | 55375000 | 2728 | nofs | nofs      |
| chr02 | E | 2p16 | 3 | 55625000 | 2130 | nofs | nofs      |
| chr02 | E | 2p16 | 3 | 55875000 | 4244 | nofs | nofs      |
| chr02 | E | 2p16 | 3 | 56125000 | 1076 | nofs | nofs      |
| chr02 | E | 2p16 | 3 | 56375000 | 1619 | nofs | nofs      |
| chr02 | E | 2p16 | 3 | 56625000 | 1406 | nofs | nofs      |
| chr02 | E | 2p16 | 3 | 56875000 | 1979 | nofs | nofs      |
| chr02 | E | 2p16 | 3 | 57125000 | 2183 | nofs | nofs      |
| chr02 | E | 2p16 | 3 | 57375000 | 5140 | nofs | nofs      |
| chr02 | E | 2p16 | 3 | 57625000 | 2806 | nofs | nofs      |
| chr02 | E | 2p16 | 3 | 57875000 | 1871 | nofs | nofs      |
| chr02 | E | 2p16 | 3 | 58125000 | 1626 | nofs | nofs      |
| chr02 | E | 2p16 | 3 | 58375000 | 2523 | nofs | nofs      |
| chr02 | E | 2p16 | 3 | 58625000 | 2284 | nofs | nofs      |
| chr02 | E | 2p16 | 3 | 58875000 | 1296 | nofs | nofs      |
| chr02 | E | 2p16 | 3 | 59125000 | 1516 | nofs | nofs      |

|       |   |      |   |          |      |      |      |
|-------|---|------|---|----------|------|------|------|
| chr02 | E | 2p16 | 3 | 59375000 | 3033 | nofs | nofs |
| chr02 | E | 2p16 | 3 | 59625000 | 2547 | nofs | nofs |
| chr02 | E | 2p16 | 3 | 59875000 | 2477 | nofs | nofs |
| chr02 | E | 2p16 | 3 | 60125000 | 2042 | nofs | nofs |
| chr02 | E | 2p16 | 3 | 60375000 | 2161 | nofs | nofs |
| chr02 | E | 2p16 | 3 | 60625000 | 4281 | nofs | nofs |
| chr02 | E | 2p16 | 3 | 60875000 | 2793 | nofs | nofs |
| chr02 | E | 2p16 | 3 | 61125000 | 2649 | nofs | nofs |
| chr02 | E | 2p16 | 3 | 61375000 | 3986 | nofs | nofs |
| chr02 | E | 2p15 | 2 | 61625000 | 5240 | nofs | nofs |
| chr02 | E | 2p15 | 2 | 61875000 | 3788 | nofs | nofs |
| chr02 | E | 2p15 | 2 | 62125000 | 2604 | nofs | nofs |
| chr02 | E | 2p15 | 2 | 62375000 | 2789 | nofs | nofs |
| chr02 | E | 2p15 | 2 | 62625000 | 1840 | nofs | nofs |
| chr02 | E | 2p15 | 2 | 62875000 | 3290 | nofs | nofs |
| chr02 | E | 2p15 | 2 | 63125000 | 2393 | nofs | nofs |
| chr02 | E | 2p15 | 2 | 63375000 | 2398 | nofs | nofs |
| chr02 | E | 2p15 | 2 | 63625000 | 2122 | nofs | nofs |
| chr02 | E | 2p15 | 2 | 63875000 | 3742 | nofs | nofs |
| chr02 | E | 2p14 | 1 | 64125000 | 2594 | nofs | nofs |
| chr02 | E | 2p14 | 1 | 64375000 | 2460 | nofs | nofs |
| chr02 | E | 2p14 | 1 | 64625000 | 3865 | nofs | nofs |
| chr02 | E | 2p14 | 1 | 64875000 | 3076 | nofs | nofs |
| chr02 | E | 2p14 | 1 | 65125000 | 2058 | nofs | nofs |
| chr02 | E | 2p14 | 1 | 65375000 | 4261 | nofs | nofs |
| chr02 | E | 2p14 | 1 | 65625000 | 3973 | nofs | nofs |
| chr02 | E | 2p14 | 1 | 65875000 | 2126 | nofs | nofs |
| chr02 | E | 2p14 | 1 | 66125000 | 2095 | nofs | nofs |
| chr02 | E | 2p14 | 1 | 66375000 | 1785 | nofs | nofs |
| chr02 | E | 2p14 | 1 | 66625000 | 1363 | nofs | nofs |
| chr02 | E | 2p14 | 1 | 66875000 | 2818 | nofs | nofs |
| chr02 | E | 2p14 | 1 | 67125000 | 1963 | nofs | nofs |
| chr02 | E | 2p14 | 1 | 67375000 | 2981 | nofs | nofs |
| chr02 | E | 2p14 | 1 | 67625000 | 1600 | nofs | nofs |
| chr02 | E | 2p14 | 1 | 67875000 | 2951 | nofs | nofs |
| chr02 | E | 2p14 | 1 | 68125000 | 2510 | nofs | nofs |

|       |   |      |   |          |       |      |           |
|-------|---|------|---|----------|-------|------|-----------|
| chr02 | E | 2p14 | 1 | 68375000 | 2732  | nofs | nofs      |
| chr02 | E | 2p13 | 5 | 68625000 | 7763  | fs   | fs common |
| chr02 | E | 2p13 | 5 | 68875000 | 1725  | fs   | fs common |
| chr02 | E | 2p13 | 5 | 69125000 | 2021  | fs   | fs common |
| chr02 | E | 2p13 | 5 | 69375000 | 1183  | fs   | fs common |
| chr02 | E | 2p13 | 5 | 69625000 | 3595  | fs   | fs common |
| chr02 | E | 2p13 | 5 | 69875000 | 2841  | fs   | fs common |
| chr02 | E | 2p13 | 5 | 70125000 | 4055  | fs   | fs common |
| chr02 | E | 2p13 | 5 | 70375000 | 3981  | fs   | fs common |
| chr02 | E | 2p13 | 5 | 70625000 | 4012  | fs   | fs common |
| chr02 | E | 2p13 | 5 | 70875000 | 2971  | fs   | fs common |
| chr02 | E | 2p13 | 5 | 71125000 | 12738 | fs   | fs common |
| chr02 | E | 2p13 | 5 | 71375000 | 3314  | fs   | fs common |
| chr02 | E | 2p13 | 5 | 71625000 | 3344  | fs   | fs common |
| chr02 | E | 2p13 | 5 | 71875000 | 5718  | fs   | fs common |
| chr02 | E | 2p13 | 5 | 72125000 | 2900  | fs   | fs common |
| chr02 | E | 2p13 | 5 | 72375000 | 1930  | fs   | fs common |
| chr02 | E | 2p13 | 5 | 72625000 | 1982  | fs   | fs common |
| chr02 | E | 2p13 | 5 | 72875000 | 2911  | fs   | fs common |
| chr02 | E | 2p13 | 5 | 73125000 | 1802  | fs   | fs common |
| chr02 | E | 2p13 | 5 | 73375000 | 3844  | fs   | fs common |
| chr02 | E | 2p13 | 5 | 73625000 | 5741  | fs   | fs common |
| chr02 | E | 2p13 | 5 | 73875000 | 2579  | fs   | fs common |
| chr02 | E | 2p13 | 5 | 74125000 | 3176  | fs   | fs common |
| chr02 | E | 2p13 | 5 | 74375000 | 4790  | fs   | fs common |
| chr02 | E | 2p13 | 5 | 74625000 | 3230  | fs   | fs common |
| chr02 | E | 2p13 | 5 | 74875000 | 2627  | fs   | fs common |
| chr02 | E | 2p13 | 5 | 75125000 | 2188  | fs   | fs common |
| chr02 | E | 2p12 | 2 | 75375000 | 1775  | nofs | nofs      |
| chr02 | E | 2p12 | 2 | 75625000 | 1584  | nofs | nofs      |
| chr02 | E | 2p12 | 2 | 75875000 | 3978  | nofs | nofs      |
| chr02 | E | 2p12 | 2 | 76125000 | 3053  | nofs | nofs      |
| chr02 | E | 2p12 | 2 | 76375000 | 1917  | nofs | nofs      |
| chr02 | E | 2p12 | 2 | 76625000 | 2033  | nofs | nofs      |
| chr02 | E | 2p12 | 2 | 76875000 | 1922  | nofs | nofs      |
| chr02 | E | 2p12 | 2 | 77125000 | 1967  | nofs | nofs      |

|       |   |        |   |          |      |         |         |
|-------|---|--------|---|----------|------|---------|---------|
| chr02 | E | 2p12   | 2 | 77375000 | 3689 | nofs    | nofs    |
| chr02 | E | 2p12   | 2 | 77625000 | 3074 | nofs    | nofs    |
| chr02 | E | 2p12   | 2 | 77875000 | 3850 | nofs    | nofs    |
| chr02 | E | 2p12   | 2 | 78125000 | 3009 | nofs    | nofs    |
| chr02 | E | 2p12   | 2 | 78375000 | 2959 | nofs    | nofs    |
| chr02 | E | 2p12   | 2 | 78625000 | 2735 | nofs    | nofs    |
| chr02 | E | 2p12   | 2 | 78875000 | 2511 | nofs    | nofs    |
| chr02 | E | 2p12   | 2 | 79125000 | 1477 | nofs    | nofs    |
| chr02 | E | 2p12   | 2 | 79375000 | 2404 | nofs    | nofs    |
| chr02 | E | 2p12   | 2 | 79625000 | 1524 | nofs    | nofs    |
| chr02 | E | 2p12   | 2 | 79875000 | 1852 | nofs    | nofs    |
| chr02 | E | 2p12   | 2 | 80125000 | 2908 | nofs    | nofs    |
| chr02 | E | 2p12   | 2 | 80375000 | 2579 | nofs    | nofs    |
| chr02 | E | 2p12   | 2 | 80625000 | 1718 | nofs    | nofs    |
| chr02 | E | 2p12   | 2 | 80875000 | 2174 | nofs    | nofs    |
| chr02 | E | 2p12   | 2 | 81125000 | 4200 | nofs    | nofs    |
| chr02 | E | 2p12   | 2 | 81375000 | 1658 | nofs    | nofs    |
| chr02 | E | 2p12   | 2 | 81625000 | 2721 | nofs    | nofs    |
| chr02 | E | 2p12   | 2 | 81875000 | 1430 | nofs    | nofs    |
| chr02 | E | 2p12   | 2 | 82125000 | 2343 | nofs    | nofs    |
| chr02 | E | 2p12   | 2 | 82375000 | 4221 | nofs    | nofs    |
| chr02 | E | 2p12   | 2 | 82625000 | 4198 | nofs    | nofs    |
| chr02 | E | 2p12   | 2 | 82875000 | 2627 | nofs    | nofs    |
| chr02 | E | 2p12   | 2 | 83125000 | 4550 | nofs    | nofs    |
| chr02 | E | 2p11.2 | 1 | 83375000 | 5958 | fs rare | fs rare |
| chr02 | E | 2p11.2 | 1 | 83625000 | 3327 | fs rare | fs rare |
| chr02 | E | 2p11.2 | 1 | 83875000 | 2677 | fs rare | fs rare |
| chr02 | E | 2p11.2 | 1 | 84125000 | 2641 | fs rare | fs rare |
| chr02 | E | 2p11.2 | 1 | 84375000 | 2771 | fs rare | fs rare |
| chr02 | E | 2p11.2 | 1 | 84625000 | 2088 | fs rare | fs rare |
| chr02 | E | 2p11.2 | 1 | 84875000 | 2578 | fs rare | fs rare |
| chr02 | E | 2p11.2 | 1 | 85125000 | 5224 | fs rare | fs rare |
| chr02 | E | 2p11.2 | 1 | 85375000 | 3196 | fs rare | fs rare |
| chr02 | E | 2p11.2 | 1 | 85625000 | 3710 | fs rare | fs rare |
| chr02 | E | 2p11.2 | 1 | 85875000 | 3011 | fs rare | fs rare |
| chr02 | E | 2p11.2 | 1 | 86125000 | 2416 | fs rare | fs rare |

|       |   |        |   |          |       |      |         |
|-------|---|--------|---|----------|-------|------|---------|
| chr02 | E | 2p11.2 | 1 | 86375000 | 1704  | fs   | fs rare |
| chr02 | E | 2p11.2 | 1 | 86625000 | 5115  | fs   | fs rare |
| chr02 | E | 2p11.2 | 1 | 86875000 | 2679  | fs   | fs rare |
| chr02 | E | 2p11.2 | 1 | 87125000 | 4004  | fs   | fs rare |
| chr02 | E | 2p11.2 | 1 | 87375000 | 6789  | fs   | fs rare |
| chr02 | E | 2p11.2 | 1 | 87625000 | 44012 | fs   | fs rare |
| chr02 | E | 2p11.2 | 1 | 87875000 | 2274  | fs   | fs rare |
| chr02 | E | 2p11.2 | 1 | 88125000 | 3221  | fs   | fs rare |
| chr02 | E | 2p11.2 | 1 | 88375000 | 3560  | fs   | fs rare |
| chr02 | E | 2p11.2 | 1 | 88625000 | 4160  | fs   | fs rare |
| chr02 | C | 2p11.2 | 1 | 88875000 | 1240  | fs   | fs rare |
| chr02 | C | 2p11.2 | 1 | 89125000 | 4704  | fs   | fs rare |
| chr02 | C | 2p11.2 | 1 | 89375000 | 3101  | fs   | fs rare |
| chr02 | C | 2p11.2 | 1 | 89625000 | 1771  | fs   | fs rare |
| chr02 | C | 2p11.2 | 1 | 89875000 | 8132  | fs   | fs rare |
| chr02 | C | 2p11.2 | 1 | 90125000 | 1566  | fs   | fs rare |
| chr02 | C | 2p11.1 | . | 90375000 | 0     | nofs | nofs    |
| chr02 | C | 2p11.1 | . | 90625000 | 0     | nofs | nofs    |
| chr02 | C | 2p11.1 | . | 90875000 | 0     | nofs | nofs    |
| chr02 | C | 2p11.1 | . | 90875000 | 0     | nofs | nofs    |
| chr02 | C | 2p11.1 | . | 91125000 | 41837 | nofs | nofs    |
| chr02 | C | 2p11.1 | . | 91375000 | 3807  | nofs | nofs    |
| chr02 | C | 2p11.1 | . | 91625000 | 65194 | nofs | nofs    |
| chr02 | C | 2p11.1 | . | 91875000 | 0     | nofs | nofs    |
| chr02 | C | 2p11.1 | . | 92125000 | 0     | nofs | nofs    |
| chr02 | C | 2p11.1 | . | 92375000 | 0     | nofs | nofs    |
| chr02 | C | 2p11.1 | . | 92625000 | 0     | nofs | nofs    |
| chr02 | C | 2p11.1 | . | 92875000 | 0     | nofs | nofs    |
| chr02 | C | 2p11.1 | . | 93125000 | 0     | nofs | nofs    |
| chr02 | C | 2p11.1 | . | 93375000 | 0     | nofs | nofs    |
| chr02 | C | 2p11.1 | . | 93625000 | 0     | nofs | nofs    |
| chr02 | C | 2p11.1 | . | 93875000 | 0     | nofs | nofs    |
| chr02 | C | 2p11.1 | . | 94125000 | 0     | nofs | nofs    |
| chr02 | C | 2p11.1 | . | 94375000 | 0     | nofs | nofs    |
| chr02 | C | 2p11.1 | . | 94625000 | 0     | nofs | nofs    |
| chr02 | C | 2q11.1 | . | 94875000 | 4643  | nofs | nofs    |

|       |   |        |   |          |      |         |         |
|-------|---|--------|---|----------|------|---------|---------|
| chr02 | C | 2q11.1 | . | 95125000 | 7180 | nofs    | nofs    |
| chr02 | C | 2q11.1 | . | 95375000 | 4818 | nofs    | nofs    |
| chr02 | C | 2q11.1 | . | 95625000 | 4345 | nofs    | nofs    |
| chr02 | C | 2q11.1 | . | 95875000 | 5664 | fs rare | fs rare |
| chr02 | C | 2q11.1 | . | 96125000 | 2868 | fs rare | fs rare |
| chr02 | C | 2q11.2 | 1 | 96375000 | 2775 | fs rare | fs rare |
| chr02 | C | 2q11.2 | 1 | 96625000 | 4639 | fs rare | fs rare |
| chr02 | C | 2q11.2 | 1 | 96875000 | 5322 | fs rare | fs rare |
| chr02 | C | 2q11.2 | 1 | 97125000 | 3486 | fs rare | fs rare |
| chr02 | C | 2q11.2 | 1 | 97375000 | 2952 | fs rare | fs rare |
| chr02 | C | 2q11.2 | 1 | 97625000 | 7275 | fs rare | fs rare |
| chr02 | C | 2q11.2 | 1 | 97875000 | 2482 | fs rare | fs rare |
| chr02 | E | 2q11.2 | 1 | 98125000 | 4293 | fs rare | fs rare |
| chr02 | E | 2q11.2 | 1 | 98375000 | 2292 | fs rare | fs rare |
| chr02 | E | 2q11.2 | 1 | 98625000 | 2512 | fs rare | fs rare |
| chr02 | E | 2q11.2 | 1 | 98875000 | 2861 | fs rare | fs rare |
| chr02 | E | 2q11.2 | 1 | 99125000 | 4042 | fs rare | fs rare |
| chr02 | E | 2q11.2 | 1 | 99375000 | 2911 | fs rare | fs rare |
| chr02 | E | 2q11.2 | 1 | 99625000 | 2420 | fs rare | fs rare |
| chr02 | E | 2q11.2 | 1 | 99875000 | 1457 | fs rare | fs rare |
| chr02 | E | 2q11.2 | 1 | 10000000 | 3140 | fs rare | fs rare |
| chr02 | E | 2q11.2 | 1 | 10000000 | 1509 | fs rare | fs rare |
| chr02 | E | 2q11.2 | 1 | 10100000 | 3052 | fs rare | fs rare |
| chr02 | E | 2q11.2 | 1 | 10100000 | 1436 | fs rare | fs rare |
| chr02 | E | 2q11.2 | 1 | 10100000 | 3033 | fs rare | fs rare |
| chr02 | E | 2q11.2 | 1 | 10100000 | 3058 | fs rare | fs rare |
| chr02 | E | 2q11.2 | 1 | 10200000 | 4963 | fs rare | fs rare |
| chr02 | E | 2q11.2 | 1 | 10200000 | 2199 | fs rare | fs rare |
| chr02 | E | 2q11.2 | 1 | 10200000 | 4897 | fs rare | fs rare |
| chr02 | E | 2q11.2 | 1 | 10200000 | 3624 | fs rare | fs rare |
| chr02 | E | 2q11.2 | 1 | 10300000 | 2150 | fs rare | fs rare |
| chr02 | E | 2q12   | 1 | 10300000 | 2383 | nofs    | nofs    |
| chr02 | E | 2q12   | 1 | 10300000 | 2245 | nofs    | nofs    |
| chr02 | E | 2q12   | 1 | 10300000 | 3044 | nofs    | nofs    |
| chr02 | E | 2q12   | 1 | 10400000 | 3750 | nofs    | nofs    |
| chr02 | E | 2q12   | 1 | 10400000 | 2398 | nofs    | nofs    |

|       |   |      |   |           |      |         |         |
|-------|---|------|---|-----------|------|---------|---------|
| chr02 | E | 2q12 | 1 | 104000000 | 3120 | nofs    | nofs    |
| chr02 | E | 2q12 | 1 | 104000000 | 2380 | nofs    | nofs    |
| chr02 | E | 2q12 | 1 | 105000000 | 2269 | nofs    | nofs    |
| chr02 | E | 2q12 | 1 | 105000000 | 2896 | nofs    | nofs    |
| chr02 | E | 2q12 | 1 | 105000000 | 3805 | nofs    | nofs    |
| chr02 | E | 2q12 | 1 | 105000000 | 4445 | nofs    | nofs    |
| chr02 | E | 2q12 | 1 | 106000000 | 2620 | nofs    | nofs    |
| chr02 | E | 2q12 | 1 | 106000000 | 2370 | nofs    | nofs    |
| chr02 | E | 2q12 | 1 | 106000000 | 3783 | nofs    | nofs    |
| chr02 | E | 2q12 | 1 | 106000000 | 3290 | nofs    | nofs    |
| chr02 | E | 2q12 | 1 | 107000000 | 5039 | nofs    | nofs    |
| chr02 | E | 2q12 | 1 | 107000000 | 1924 | nofs    | nofs    |
| chr02 | E | 2q12 | 1 | 107000000 | 2207 | nofs    | nofs    |
| chr02 | E | 2q12 | 1 | 107000000 | 2431 | nofs    | nofs    |
| chr02 | E | 2q12 | 1 | 108000000 | 4218 | nofs    | nofs    |
| chr02 | E | 2q12 | 1 | 108000000 | 6087 | nofs    | nofs    |
| chr02 | E | 2q12 | 1 | 108000000 | 2381 | nofs    | nofs    |
| chr02 | E | 2q12 | 1 | 108000000 | 3402 | nofs    | nofs    |
| chr02 | E | 2q12 | 1 | 109000000 | 2995 | nofs    | nofs    |
| chr02 | E | 2q13 | 6 | 109000000 | 4611 | fs rare | fs rare |
| chr02 | E | 2q13 | 6 | 109000000 | 3136 | fs rare | fs rare |
| chr02 | E | 2q13 | 6 | 109000000 | 3388 | fs rare | fs rare |
| chr02 | E | 2q13 | 6 | 110000000 | 2431 | fs rare | fs rare |
| chr02 | E | 2q13 | 6 | 110000000 | 1694 | fs rare | fs rare |
| chr02 | E | 2q13 | 6 | 110000000 | 3879 | fs rare | fs rare |
| chr02 | E | 2q13 | 6 | 110000000 | 1850 | fs rare | fs rare |
| chr02 | E | 2q13 | 6 | 111000000 | 3505 | fs rare | fs rare |
| chr02 | E | 2q13 | 6 | 111000000 | 1024 | fs rare | fs rare |
| chr02 | E | 2q13 | 6 | 111000000 | 2595 | fs rare | fs rare |
| chr02 | E | 2q13 | 6 | 111000000 | 2834 | fs rare | fs rare |
| chr02 | E | 2q13 | 6 | 112000000 | 4060 | fs rare | fs rare |
| chr02 | E | 2q13 | 6 | 112000000 | 2029 | fs rare | fs rare |
| chr02 | E | 2q13 | 6 | 112000000 | 4503 | fs rare | fs rare |
| chr02 | E | 2q13 | 6 | 112000000 | 1949 | fs rare | fs rare |
| chr02 | E | 2q13 | 6 | 113000000 | 7434 | fs rare | fs rare |
| chr02 | E | 2q13 | 6 | 113000000 | 3634 | fs rare | fs rare |



|       |   |        |   |           |      |      |         |
|-------|---|--------|---|-----------|------|------|---------|
| chr02 | E | 2q13   | 6 | 113000000 | 3318 | fs   | fs rare |
| chr02 | E | 2q13   | 6 | 113000000 | 3332 | fs   | fs rare |
| chr02 | E | 2q13   | 6 | 114000000 | 5070 | fs   | fs rare |
| chr02 | E | 2q13   | 6 | 114000000 | 5104 | fs   | fs rare |
| chr02 | E | 2q14.1 | 6 | 114000000 | 8497 | nofs | nofs    |
| chr02 | E | 2q14.1 | 6 | 114000000 | 3701 | nofs | nofs    |
| chr02 | E | 2q14.1 | 6 | 115000000 | 3273 | nofs | nofs    |
| chr02 | E | 2q14.1 | 6 | 115000000 | 5563 | nofs | nofs    |
| chr02 | E | 2q14.1 | 6 | 115000000 | 2652 | nofs | nofs    |
| chr02 | E | 2q14.1 | 6 | 115000000 | 3158 | nofs | nofs    |
| chr02 | E | 2q14.1 | 6 | 116000000 | 2295 | nofs | nofs    |
| chr02 | E | 2q14.1 | 6 | 116000000 | 3715 | nofs | nofs    |
| chr02 | E | 2q14.1 | 6 | 116000000 | 2147 | nofs | nofs    |
| chr02 | E | 2q14.1 | 6 | 116000000 | 2238 | nofs | nofs    |
| chr02 | E | 2q14.1 | 6 | 117000000 | 1936 | nofs | nofs    |
| chr02 | E | 2q14.1 | 6 | 117000000 | 2150 | nofs | nofs    |
| chr02 | E | 2q14.1 | 6 | 117000000 | 2225 | nofs | nofs    |
| chr02 | E | 2q14.1 | 6 | 117000000 | 5109 | nofs | nofs    |
| chr02 | E | 2q14.1 | 6 | 118000000 | 8119 | nofs | nofs    |
| chr02 | E | 2q14.1 | 6 | 118000000 | 3197 | nofs | nofs    |
| chr02 | E | 2q14.1 | 6 | 118000000 | 2339 | nofs | nofs    |
| chr02 | E | 2q14.1 | 6 | 118000000 | 2412 | nofs | nofs    |
| chr02 | E | 2q14.1 | 6 | 119000000 | 3612 | nofs | nofs    |
| chr02 | E | 2q14.2 | 2 | 119000000 | 3902 | nofs | nofs    |
| chr02 | E | 2q14.2 | 2 | 119000000 | 2610 | nofs | nofs    |
| chr02 | E | 2q14.2 | 2 | 119000000 | 3338 | nofs | nofs    |
| chr02 | E | 2q14.2 | 2 | 120000000 | 4112 | nofs | nofs    |
| chr02 | E | 2q14.2 | 2 | 120000000 | 3262 | nofs | nofs    |
| chr02 | E | 2q14.2 | 2 | 120000000 | 3338 | nofs | nofs    |
| chr02 | E | 2q14.2 | 2 | 120000000 | 2991 | nofs | nofs    |
| chr02 | E | 2q14.2 | 2 | 121000000 | 3232 | nofs | nofs    |
| chr02 | E | 2q14.2 | 2 | 121000000 | 3788 | nofs | nofs    |
| chr02 | E | 2q14.2 | 2 | 121000000 | 2529 | nofs | nofs    |
| chr02 | E | 2q14.2 | 2 | 121000000 | 5233 | nofs | nofs    |
| chr02 | E | 2q14.2 | 2 | 122000000 | 4444 | nofs | nofs    |
| chr02 | E | 2q14.2 | 2 | 122000000 | 2810 | nofs | nofs    |

|       |   |        |   |           |      |      |      |
|-------|---|--------|---|-----------|------|------|------|
| chr02 | E | 2q14.2 | 2 | 122000000 | 6152 | nofs | nofs |
| chr02 | E | 2q14.3 | 5 | 122000000 | 3156 | nofs | nofs |
| chr02 | E | 2q14.3 | 5 | 123000000 | 5296 | nofs | nofs |
| chr02 | E | 2q14.3 | 5 | 123000000 | 2142 | nofs | nofs |
| chr02 | E | 2q14.3 | 5 | 123000000 | 2907 | nofs | nofs |
| chr02 | E | 2q14.3 | 5 | 123000000 | 2088 | nofs | nofs |
| chr02 | E | 2q14.3 | 5 | 124000000 | 2506 | nofs | nofs |
| chr02 | E | 2q14.3 | 5 | 124000000 | 3588 | nofs | nofs |
| chr02 | E | 2q14.3 | 5 | 124000000 | 3627 | nofs | nofs |
| chr02 | E | 2q14.3 | 5 | 124000000 | 2389 | nofs | nofs |
| chr02 | E | 2q14.3 | 5 | 125000000 | 1923 | nofs | nofs |
| chr02 | E | 2q14.3 | 5 | 125000000 | 3468 | nofs | nofs |
| chr02 | E | 2q14.3 | 5 | 125000000 | 5613 | nofs | nofs |
| chr02 | E | 2q14.3 | 5 | 125000000 | 3129 | nofs | nofs |
| chr02 | E | 2q14.3 | 5 | 126000000 | 3167 | nofs | nofs |
| chr02 | E | 2q14.3 | 5 | 126000000 | 2790 | nofs | nofs |
| chr02 | E | 2q14.3 | 5 | 126000000 | 3245 | nofs | nofs |
| chr02 | E | 2q14.3 | 5 | 126000000 | 6128 | nofs | nofs |
| chr02 | E | 2q14.3 | 5 | 127000000 | 2055 | nofs | nofs |
| chr02 | E | 2q14.3 | 5 | 127000000 | 1434 | nofs | nofs |
| chr02 | E | 2q14.3 | 5 | 127000000 | 2898 | nofs | nofs |
| chr02 | E | 2q14.3 | 5 | 127000000 | 2795 | nofs | nofs |
| chr02 | E | 2q14.3 | 5 | 128000000 | 5054 | nofs | nofs |
| chr02 | E | 2q14.3 | 5 | 128000000 | 2189 | nofs | nofs |
| chr02 | E | 2q14.3 | 5 | 128000000 | 4728 | nofs | nofs |
| chr02 | E | 2q14.3 | 5 | 128000000 | 5566 | nofs | nofs |
| chr02 | E | 2q14.3 | 5 | 129000000 | 5926 | nofs | nofs |
| chr02 | E | 2q14.3 | 5 | 129000000 | 5718 | nofs | nofs |
| chr02 | E | 2q14.3 | 5 | 129000000 | 5651 | nofs | nofs |
| chr02 | E | 2q14.3 | 5 | 129000000 | 5302 | nofs | nofs |
| chr02 | E | 2q14.3 | 5 | 130000000 | 3383 | nofs | nofs |
| chr02 | E | 2q21.1 | 6 | 130000000 | 1392 | nofs | nofs |
| chr02 | E | 2q21.1 | 6 | 130000000 | 4854 | nofs | nofs |
| chr02 | E | 2q21.1 | 6 | 130000000 | 4685 | nofs | nofs |
| chr02 | E | 2q21.1 | 6 | 131000000 | 3496 | nofs | nofs |
| chr02 | E | 2q21.1 | 6 | 131000000 | 3083 | nofs | nofs |

|       |   |        |   |           |       |      |           |
|-------|---|--------|---|-----------|-------|------|-----------|
| chr02 | E | 2q21.1 | 6 | 131000000 | 1488  | nofs | nofs      |
| chr02 | E | 2q21.1 | 6 | 131000000 | 4173  | nofs | nofs      |
| chr02 | E | 2q21.1 | 6 | 132000000 | 2752  | nofs | nofs      |
| chr02 | E | 2q21.1 | 6 | 132000000 | 2635  | nofs | nofs      |
| chr02 | E | 2q21.1 | 6 | 132000000 | 2760  | nofs | nofs      |
| chr02 | E | 2q21.1 | 6 | 132000000 | 8677  | nofs | nofs      |
| chr02 | E | 2q21.2 | 5 | 133000000 | 16328 | nofs | nofs      |
| chr02 | E | 2q21.2 | 5 | 133000000 | 42957 | nofs | nofs      |
| chr02 | E | 2q21.2 | 5 | 133000000 | 2944  | nofs | nofs      |
| chr02 | E | 2q21.2 | 5 | 133000000 | 1460  | nofs | nofs      |
| chr02 | E | 2q21.2 | 5 | 134000000 | 2226  | nofs | nofs      |
| chr02 | E | 2q21.2 | 5 | 134000000 | 1404  | nofs | nofs      |
| chr02 | E | 2q21.2 | 5 | 134000000 | 2441  | nofs | nofs      |
| chr02 | E | 2q21.2 | 5 | 134000000 | 2793  | nofs | nofs      |
| chr02 | E | 2q21.2 | 5 | 135000000 | 5160  | nofs | nofs      |
| chr02 | E | 2q21.3 | 1 | 135000000 | 2584  | fs   | fs common |
| chr02 | E | 2q21.3 | 1 | 135000000 | 4859  | fs   | fs common |
| chr02 | E | 2q21.3 | 1 | 135000000 | 3674  | fs   | fs common |
| chr02 | E | 2q21.3 | 1 | 136000000 | 4404  | fs   | fs common |
| chr02 | E | 2q21.3 | 1 | 136000000 | 2380  | fs   | fs common |
| chr02 | E | 2q21.3 | 1 | 136000000 | 2696  | fs   | fs common |
| chr02 | E | 2q21.3 | 1 | 136000000 | 2415  | fs   | fs common |
| chr02 | E | 2q21.3 | 1 | 137000000 | 2143  | fs   | fs common |
| chr02 | E | 2q21.3 | 1 | 137000000 | 4486  | fs   | fs common |
| chr02 | E | 2q21.3 | 1 | 137000000 | 2336  | fs   | fs common |
| chr02 | E | 2q21.3 | 1 | 137000000 | 3159  | fs   | fs common |
| chr02 | E | 2q22   | 2 | 138000000 | 1872  | nofs | nofs      |
| chr02 | E | 2q22   | 2 | 138000000 | 2202  | nofs | nofs      |
| chr02 | E | 2q22   | 2 | 138000000 | 2424  | nofs | nofs      |
| chr02 | E | 2q22   | 2 | 138000000 | 2739  | nofs | nofs      |
| chr02 | E | 2q22   | 2 | 139000000 | 2907  | nofs | nofs      |
| chr02 | E | 2q22   | 2 | 139000000 | 2300  | nofs | nofs      |
| chr02 | E | 2q22   | 2 | 139000000 | 2171  | nofs | nofs      |
| chr02 | E | 2q22   | 2 | 139000000 | 1967  | nofs | nofs      |
| chr02 | E | 2q22   | 2 | 140000000 | 1874  | nofs | nofs      |
| chr02 | E | 2q22   | 2 | 140000000 | 2878  | nofs | nofs      |

|       |   |      |   |           |      |      |         |
|-------|---|------|---|-----------|------|------|---------|
| chr02 | E | 2q22 | 2 | 140000000 | 1887 | nofs | nofs    |
| chr02 | E | 2q22 | 2 | 140000000 | 2938 | nofs | nofs    |
| chr02 | E | 2q22 | 2 | 141000000 | 3290 | nofs | nofs    |
| chr02 | E | 2q22 | 2 | 141000000 | 3390 | nofs | nofs    |
| chr02 | E | 2q22 | 2 | 141000000 | 2267 | nofs | nofs    |
| chr02 | E | 2q22 | 2 | 141000000 | 3409 | nofs | nofs    |
| chr02 | E | 2q22 | 2 | 142000000 | 2179 | nofs | nofs    |
| chr02 | E | 2q22 | 2 | 142000000 | 2707 | nofs | nofs    |
| chr02 | E | 2q22 | 2 | 142000000 | 3576 | nofs | nofs    |
| chr02 | E | 2q22 | 2 | 142000000 | 2067 | nofs | nofs    |
| chr02 | E | 2q22 | 2 | 143000000 | 2322 | nofs | nofs    |
| chr02 | E | 2q22 | 2 | 143000000 | 2048 | nofs | nofs    |
| chr02 | E | 2q22 | 2 | 143000000 | 2533 | nofs | nofs    |
| chr02 | E | 2q22 | 2 | 143000000 | 2553 | nofs | nofs    |
| chr02 | E | 2q22 | 2 | 144000000 | 2146 | nofs | nofs    |
| chr02 | E | 2q22 | 2 | 144000000 | 1830 | nofs | nofs    |
| chr02 | E | 2q22 | 2 | 144000000 | 2017 | fs   | fs rare |
| chr02 | E | 2q22 | 2 | 144000000 | 2511 | fs   | fs rare |
| chr02 | E | 2q22 | 2 | 145000000 | 3282 | fs   | fs rare |
| chr02 | E | 2q22 | 2 | 145000000 | 2832 | fs   | fs rare |
| chr02 | E | 2q22 | 2 | 145000000 | 2344 | fs   | fs rare |
| chr02 | E | 2q22 | 2 | 145000000 | 1538 | fs   | fs rare |
| chr02 | E | 2q22 | 2 | 146000000 | 2544 | fs   | fs rare |
| chr02 | E | 2q22 | 2 | 146000000 | 1526 | fs   | fs rare |
| chr02 | E | 2q22 | 2 | 146000000 | 2519 | fs   | fs rare |
| chr02 | E | 2q22 | 2 | 146000000 | 3460 | fs   | fs rare |
| chr02 | E | 2q22 | 2 | 147000000 | 2721 | fs   | fs rare |
| chr02 | E | 2q22 | 2 | 147000000 | 2802 | fs   | fs rare |
| chr02 | E | 2q22 | 2 | 147000000 | 1990 | fs   | fs rare |
| chr02 | E | 2q22 | 2 | 147000000 | 1983 | fs   | fs rare |
| chr02 | E | 2q22 | 2 | 148000000 | 2835 | fs   | fs rare |
| chr02 | E | 2q22 | 2 | 148000000 | 1666 | fs   | fs rare |
| chr02 | E | 2q22 | 2 | 148000000 | 2303 | fs   | fs rare |
| chr02 | E | 2q22 | 2 | 148000000 | 2948 | fs   | fs rare |
| chr02 | E | 2q22 | 2 | 149000000 | 2902 | fs   | fs rare |
| chr02 | E | 2q23 | 2 | 149000000 | 2231 | nofs | nofs    |

|       |   |        |   |           |      |      |      |
|-------|---|--------|---|-----------|------|------|------|
| chr02 | E | 2q23   | 2 | 149000000 | 2042 | nofs | nofs |
| chr02 | E | 2q23   | 2 | 149000000 | 3148 | nofs | nofs |
| chr02 | E | 2q23   | 2 | 150000000 | 1002 | nofs | nofs |
| chr02 | E | 2q23   | 2 | 150000000 | 1921 | nofs | nofs |
| chr02 | E | 2q23   | 2 | 150000000 | 1377 | nofs | nofs |
| chr02 | E | 2q23   | 2 | 150000000 | 1966 | nofs | nofs |
| chr02 | E | 2q23   | 2 | 151000000 | 3838 | nofs | nofs |
| chr02 | E | 2q23   | 2 | 151000000 | 2515 | nofs | nofs |
| chr02 | E | 2q23   | 2 | 151000000 | 2300 | nofs | nofs |
| chr02 | E | 2q23   | 2 | 151000000 | 2141 | nofs | nofs |
| chr02 | E | 2q23   | 2 | 152000000 | 2604 | nofs | nofs |
| chr02 | E | 2q23   | 2 | 152000000 | 2851 | nofs | nofs |
| chr02 | E | 2q23   | 2 | 152000000 | 2318 | nofs | nofs |
| chr02 | E | 2q23   | 2 | 152000000 | 1598 | nofs | nofs |
| chr02 | E | 2q23   | 2 | 153000000 | 2264 | nofs | nofs |
| chr02 | E | 2q23   | 2 | 153000000 | 3633 | nofs | nofs |
| chr02 | E | 2q23   | 2 | 153000000 | 2262 | nofs | nofs |
| chr02 | E | 2q23   | 2 | 153000000 | 2025 | nofs | nofs |
| chr02 | E | 2q23   | 2 | 154000000 | 3157 | nofs | nofs |
| chr02 | E | 2q23   | 2 | 154000000 | 1344 | nofs | nofs |
| chr02 | E | 2q23   | 2 | 154000000 | 1814 | nofs | nofs |
| chr02 | E | 2q23   | 2 | 154000000 | 1552 | nofs | nofs |
| chr02 | E | 2q23   | 2 | 155000000 | 2024 | nofs | nofs |
| chr02 | E | 2q23   | 2 | 155000000 | 3360 | nofs | nofs |
| chr02 | B | 2q24.1 | . | 155000000 | 1643 | nofs | nofs |
| chr02 | B | 2q24.1 | . | 155000000 | 2305 | nofs | nofs |
| chr02 | B | 2q24.1 | . | 155000000 | 3424 | nofs | nofs |
| chr02 | B | 2q24.1 | . | 156000000 | 2066 | nofs | nofs |
| chr02 | B | 2q24.1 | . | 156000000 | 2625 | nofs | nofs |
| chr02 | B | 2q24.1 | . | 156000000 | 1634 | nofs | nofs |
| chr02 | B | 2q24.1 | . | 157000000 | 1807 | nofs | nofs |
| chr02 | B | 2q24.1 | . | 157000000 | 2211 | nofs | nofs |
| chr02 | B | 2q24.1 | . | 157000000 | 4271 | nofs | nofs |
| chr02 | B | 2q24.1 | . | 157000000 | 1734 | nofs | nofs |
| chr02 | B | 2q24.1 | . | 158000000 | 1791 | nofs | nofs |
| chr02 | B | 2q24.1 | . | 158000000 | 1606 | nofs | nofs |

|       |   |        |   |           |      |      |      |
|-------|---|--------|---|-----------|------|------|------|
| chr02 | B | 2q24.1 | . | 158000000 | 2413 | nofs | nofs |
| chr02 | B | 2q24.1 | . | 158000000 | 1822 | nofs | nofs |
| chr02 | B | 2q24.1 | . | 159000000 | 2647 | nofs | nofs |
| chr02 | B | 2q24.1 | . | 159000000 | 2204 | nofs | nofs |
| chr02 | B | 2q24.1 | . | 159000000 | 732  | nofs | nofs |
| chr02 | B | 2q24.1 | . | 159000000 | 1797 | nofs | nofs |
| chr02 | E | 2q24.2 | 1 | 160000000 | 8013 | nofs | nofs |
| chr02 | E | 2q24.2 | 1 | 160000000 | 1613 | nofs | nofs |
| chr02 | E | 2q24.2 | 1 | 160000000 | 1561 | nofs | nofs |
| chr02 | E | 2q24.2 | 1 | 160000000 | 2775 | nofs | nofs |
| chr02 | E | 2q24.2 | 1 | 161000000 | 3131 | nofs | nofs |
| chr02 | E | 2q24.2 | 1 | 161000000 | 1704 | nofs | nofs |
| chr02 | E | 2q24.2 | 1 | 161000000 | 3407 | nofs | nofs |
| chr02 | E | 2q24.2 | 1 | 161000000 | 1834 | nofs | nofs |
| chr02 | E | 2q24.2 | 1 | 162000000 | 1455 | nofs | nofs |
| chr02 | E | 2q24.2 | 1 | 162000000 | 1085 | nofs | nofs |
| chr02 | E | 2q24.2 | 1 | 162000000 | 1281 | nofs | nofs |
| chr02 | E | 2q24.2 | 1 | 162000000 | 3151 | nofs | nofs |
| chr02 | E | 2q24.2 | 1 | 163000000 | 2386 | nofs | nofs |
| chr02 | E | 2q24.2 | 1 | 163000000 | 1879 | nofs | nofs |
| chr02 | E | 2q24.2 | 1 | 163000000 | 2443 | nofs | nofs |
| chr02 | E | 2q24.2 | 1 | 163000000 | 1847 | nofs | nofs |
| chr02 | E | 2q24.2 | 1 | 164000000 | 2440 | nofs | nofs |
| chr02 | B | 2q24.3 | . | 164000000 | 2023 | nofs | nofs |
| chr02 | B | 2q24.3 | . | 164000000 | 2292 | nofs | nofs |
| chr02 | B | 2q24.3 | . | 164000000 | 2215 | nofs | nofs |
| chr02 | B | 2q24.3 | . | 165000000 | 1927 | nofs | nofs |
| chr02 | B | 2q24.3 | . | 165000000 | 2832 | nofs | nofs |
| chr02 | B | 2q24.3 | . | 165000000 | 2200 | nofs | nofs |
| chr02 | B | 2q24.3 | . | 165000000 | 1792 | nofs | nofs |
| chr02 | B | 2q24.3 | . | 166000000 | 2332 | nofs | nofs |
| chr02 | B | 2q24.3 | . | 166000000 | 2876 | nofs | nofs |
| chr02 | B | 2q24.3 | . | 166000000 | 1998 | nofs | nofs |
| chr02 | B | 2q24.3 | . | 166000000 | 3570 | nofs | nofs |
| chr02 | B | 2q24.3 | . | 167000000 | 2312 | nofs | nofs |
| chr02 | B | 2q24.3 | . | 167000000 | 3815 | nofs | nofs |

|       |   |        |   |           |      |      |           |
|-------|---|--------|---|-----------|------|------|-----------|
| chr02 | B | 2q24.3 | . | 167000000 | 2553 | nofs | nofs      |
| chr02 | B | 2q24.3 | . | 167000000 | 6406 | nofs | nofs      |
| chr02 | B | 2q24.3 | . | 168000000 | 3186 | nofs | nofs      |
| chr02 | B | 2q24.3 | . | 168000000 | 2013 | nofs | nofs      |
| chr02 | B | 2q24.3 | . | 168000000 | 2889 | nofs | nofs      |
| chr02 | B | 2q24.3 | . | 168000000 | 1718 | nofs | nofs      |
| chr02 | B | 2q24.3 | . | 169000000 | 2325 | nofs | nofs      |
| chr02 | B | 2q24.3 | . | 169000000 | 1735 | nofs | nofs      |
| chr02 | B | 2q24.3 | . | 169000000 | 2143 | nofs | nofs      |
| chr02 | B | 2q24.3 | . | 169000000 | 2660 | nofs | nofs      |
| chr02 | B | 2q31   | . | 170000000 | 2677 | fs   | fs common |
| chr02 | B | 2q31   | . | 170000000 | 2005 | fs   | fs common |
| chr02 | B | 2q31   | . | 170000000 | 8680 | fs   | fs common |
| chr02 | B | 2q31   | . | 170000000 | 4308 | fs   | fs common |
| chr02 | B | 2q31   | . | 171000000 | 4356 | fs   | fs common |
| chr02 | B | 2q31   | . | 171000000 | 2800 | fs   | fs common |
| chr02 | B | 2q31   | . | 171000000 | 2449 | fs   | fs common |
| chr02 | B | 2q31   | . | 171000000 | 3330 | fs   | fs common |
| chr02 | B | 2q31   | . | 172000000 | 4042 | fs   | fs common |
| chr02 | B | 2q31   | . | 172000000 | 2432 | fs   | fs common |
| chr02 | B | 2q31   | . | 172000000 | 3511 | fs   | fs common |
| chr02 | B | 2q31   | . | 172000000 | 2621 | fs   | fs common |
| chr02 | B | 2q31   | . | 173000000 | 5615 | fs   | fs common |
| chr02 | B | 2q31   | . | 173000000 | 1809 | fs   | fs common |
| chr02 | B | 2q31   | . | 173000000 | 3492 | fs   | fs common |
| chr02 | B | 2q31   | . | 173000000 | 4646 | fs   | fs common |
| chr02 | B | 2q31   | . | 174000000 | 1736 | fs   | fs common |
| chr02 | B | 2q31   | . | 174000000 | 2286 | fs   | fs common |
| chr02 | B | 2q31   | . | 174000000 | 2436 | fs   | fs common |
| chr02 | B | 2q31   | . | 174000000 | 4446 | fs   | fs common |
| chr02 | B | 2q31   | . | 175000000 | 1755 | fs   | fs common |
| chr02 | B | 2q31   | . | 175000000 | 2641 | fs   | fs common |
| chr02 | B | 2q31   | . | 175000000 | 3140 | fs   | fs common |
| chr02 | B | 2q31   | . | 175000000 | 4575 | fs   | fs common |
| chr02 | B | 2q31   | . | 176000000 | 1906 | fs   | fs common |
| chr02 | B | 2q31   | . | 176000000 | 2872 | fs   | fs common |

|       |   |        |   |           |      |    |           |
|-------|---|--------|---|-----------|------|----|-----------|
| chr02 | B | 2q31   | . | 176000000 | 2035 | fs | fs common |
| chr02 | B | 2q31   | . | 176000000 | 1931 | fs | fs common |
| chr02 | B | 2q31   | . | 177000000 | 1283 | fs | fs common |
| chr02 | B | 2q31   | . | 177000000 | 1650 | fs | fs common |
| chr02 | B | 2q31   | . | 177000000 | 2100 | fs | fs common |
| chr02 | B | 2q31   | . | 177000000 | 1529 | fs | fs common |
| chr02 | B | 2q31   | . | 178000000 | 1565 | fs | fs common |
| chr02 | B | 2q31   | . | 178000000 | 3223 | fs | fs common |
| chr02 | B | 2q31   | . | 178000000 | 3458 | fs | fs common |
| chr02 | B | 2q31   | . | 178000000 | 1815 | fs | fs common |
| chr02 | B | 2q31   | . | 179000000 | 5371 | fs | fs common |
| chr02 | B | 2q31   | . | 179000000 | 2148 | fs | fs common |
| chr02 | B | 2q31   | . | 179000000 | 1843 | fs | fs common |
| chr02 | B | 2q31   | . | 179000000 | 4805 | fs | fs common |
| chr02 | B | 2q31   | . | 180000000 | 2483 | fs | fs common |
| chr02 | B | 2q31   | . | 180000000 | 1992 | fs | fs common |
| chr02 | B | 2q31   | . | 180000000 | 4021 | fs | fs common |
| chr02 | B | 2q31   | . | 180000000 | 1545 | fs | fs common |
| chr02 | B | 2q31   | . | 181000000 | 4355 | fs | fs common |
| chr02 | B | 2q31   | . | 181000000 | 1178 | fs | fs common |
| chr02 | B | 2q31   | . | 181000000 | 1877 | fs | fs common |
| chr02 | B | 2q31   | . | 181000000 | 3057 | fs | fs common |
| chr02 | B | 2q31   | . | 182000000 | 1239 | fs | fs common |
| chr02 | B | 2q31   | . | 182000000 | 2691 | fs | fs common |
| chr02 | B | 2q31   | . | 182000000 | 1467 | fs | fs common |
| chr02 | B | 2q31   | . | 182000000 | 1578 | fs | fs common |
| chr02 | B | 2q31   | . | 183000000 | 1735 | fs | fs common |
| chr02 | B | 2q31   | . | 183000000 | 1819 | fs | fs common |
| chr02 | E | 2q32.1 | 2 | 183000000 | 2646 | fs | fs common |
| chr02 | E | 2q32.1 | 2 | 183000000 | 3536 | fs | fs common |
| chr02 | E | 2q32.1 | 2 | 184000000 | 1674 | fs | fs common |
| chr02 | E | 2q32.1 | 2 | 184000000 | 2468 | fs | fs common |
| chr02 | E | 2q32.1 | 2 | 184000000 | 2865 | fs | fs common |
| chr02 | E | 2q32.1 | 2 | 184000000 | 2505 | fs | fs common |
| chr02 | E | 2q32.1 | 2 | 185000000 | 1568 | fs | fs common |
| chr02 | E | 2q32.1 | 2 | 185000000 | 2245 | fs | fs common |



|       |   |        |   |           |      |      |           |
|-------|---|--------|---|-----------|------|------|-----------|
| chr02 | E | 2q32.1 | 2 | 185000000 | 2408 | fs   | fs common |
| chr02 | E | 2q32.1 | 2 | 185000000 | 1864 | fs   | fs common |
| chr02 | E | 2q32.1 | 2 | 186000000 | 2214 | fs   | fs common |
| chr02 | E | 2q32.1 | 2 | 186000000 | 2943 | fs   | fs common |
| chr02 | E | 2q32.1 | 2 | 186000000 | 2726 | fs   | fs common |
| chr02 | E | 2q32.1 | 2 | 186000000 | 1430 | fs   | fs common |
| chr02 | E | 2q32.1 | 2 | 187000000 | 3389 | fs   | fs common |
| chr02 | E | 2q32.1 | 2 | 187000000 | 3053 | fs   | fs common |
| chr02 | E | 2q32.1 | 2 | 187000000 | 2487 | fs   | fs common |
| chr02 | E | 2q32.1 | 2 | 187000000 | 2253 | fs   | fs common |
| chr02 | E | 2q32.1 | 2 | 188000000 | 2296 | fs   | fs common |
| chr02 | E | 2q32.1 | 2 | 188000000 | 2288 | fs   | fs common |
| chr02 | E | 2q32.1 | 2 | 188000000 | 3160 | fs   | fs common |
| chr02 | E | 2q32.1 | 2 | 188000000 | 3020 | fs   | fs common |
| chr02 | E | 2q32.1 | 2 | 189000000 | 6163 | fs   | fs common |
| chr02 | E | 2q32.1 | 2 | 189000000 | 2148 | fs   | fs common |
| chr02 | E | 2q32.1 | 2 | 189000000 | 1479 | fs   | fs common |
| chr02 | E | 2q32.2 | 3 | 189000000 | 2301 | nofs | nofs      |
| chr02 | E | 2q32.2 | 3 | 190000000 | 2531 | nofs | nofs      |
| chr02 | E | 2q32.2 | 3 | 190000000 | 985  | nofs | nofs      |
| chr02 | E | 2q32.2 | 3 | 190000000 | 2304 | nofs | nofs      |
| chr02 | E | 2q32.2 | 3 | 190000000 | 3033 | nofs | nofs      |
| chr02 | E | 2q32.2 | 3 | 191000000 | 2240 | nofs | nofs      |
| chr02 | E | 2q32.2 | 3 | 191000000 | 1854 | nofs | nofs      |
| chr02 | E | 2q32.2 | 3 | 191000000 | 3831 | nofs | nofs      |
| chr02 | E | 2q32.2 | 3 | 191000000 | 2098 | nofs | nofs      |
| chr02 | E | 2q32.2 | 3 | 192000000 | 2399 | nofs | nofs      |
| chr02 | E | 2q32.2 | 3 | 192000000 | 1847 | nofs | nofs      |
| chr02 | E | 2q32.3 | 1 | 192000000 | 3438 | nofs | nofs      |
| chr02 | E | 2q32.3 | 1 | 192000000 | 4139 | nofs | nofs      |
| chr02 | E | 2q32.3 | 1 | 193000000 | 2302 | nofs | nofs      |
| chr02 | E | 2q32.3 | 1 | 193000000 | 2330 | nofs | nofs      |
| chr02 | E | 2q32.3 | 1 | 193000000 | 2914 | nofs | nofs      |
| chr02 | E | 2q32.3 | 1 | 193000000 | 4791 | nofs | nofs      |
| chr02 | E | 2q32.3 | 1 | 194000000 | 3022 | nofs | nofs      |
| chr02 | E | 2q32.3 | 1 | 194000000 | 2041 | nofs | nofs      |

|       |   |        |   |           |      |      |           |
|-------|---|--------|---|-----------|------|------|-----------|
| chr02 | E | 2q32.3 | 1 | 194000000 | 3169 | nofs | nofs      |
| chr02 | E | 2q32.3 | 1 | 194000000 | 2695 | nofs | nofs      |
| chr02 | E | 2q32.3 | 1 | 195000000 | 4941 | nofs | nofs      |
| chr02 | E | 2q32.3 | 1 | 195000000 | 2641 | nofs | nofs      |
| chr02 | E | 2q32.3 | 1 | 195000000 | 4597 | nofs | nofs      |
| chr02 | E | 2q32.3 | 1 | 195000000 | 3828 | nofs | nofs      |
| chr02 | E | 2q32.3 | 1 | 196000000 | 1492 | nofs | nofs      |
| chr02 | E | 2q32.3 | 1 | 196000000 | 1353 | nofs | nofs      |
| chr02 | E | 2q32.3 | 1 | 196000000 | 2689 | nofs | nofs      |
| chr02 | E | 2q32.3 | 1 | 196000000 | 2893 | nofs | nofs      |
| chr02 | E | 2q32.3 | 1 | 197000000 | 2186 | nofs | nofs      |
| chr02 | E | 2q32.3 | 1 | 197000000 | 1754 | nofs | nofs      |
| chr02 | E | 2q32.3 | 1 | 197000000 | 1319 | nofs | nofs      |
| chr02 | E | 2q32.3 | 1 | 197000000 | 2316 | nofs | nofs      |
| chr02 | E | 2q33   | 1 | 198000000 | 2322 | fs   | fs common |
| chr02 | E | 2q33   | 1 | 198000000 | 1947 | fs   | fs common |
| chr02 | E | 2q33   | 1 | 198000000 | 3106 | fs   | fs common |
| chr02 | E | 2q33   | 1 | 198000000 | 3916 | fs   | fs common |
| chr02 | E | 2q33   | 1 | 199000000 | 3453 | fs   | fs common |
| chr02 | E | 2q33   | 1 | 199000000 | 2123 | fs   | fs common |
| chr02 | E | 2q33   | 1 | 199000000 | 2791 | fs   | fs common |
| chr02 | E | 2q33   | 1 | 199000000 | 1520 | fs   | fs common |
| chr02 | E | 2q33   | 1 | 200000000 | 3941 | fs   | fs common |
| chr02 | E | 2q33   | 1 | 200000000 | 1929 | fs   | fs common |
| chr02 | E | 2q33   | 1 | 200000000 | 1942 | fs   | fs common |
| chr02 | E | 2q33   | 1 | 200000000 | 1906 | fs   | fs common |
| chr02 | E | 2q33   | 1 | 201000000 | 1599 | fs   | fs common |
| chr02 | E | 2q33   | 1 | 201000000 | 2836 | fs   | fs common |
| chr02 | E | 2q33   | 1 | 201000000 | 1518 | fs   | fs common |
| chr02 | E | 2q33   | 1 | 201000000 | 3538 | fs   | fs common |
| chr02 | E | 2q33   | 1 | 202000000 | 2644 | fs   | fs common |
| chr02 | E | 2q33   | 1 | 202000000 | 4359 | fs   | fs common |
| chr02 | E | 2q33   | 1 | 202000000 | 2492 | fs   | fs common |
| chr02 | E | 2q33   | 1 | 202000000 | 2789 | fs   | fs common |
| chr02 | E | 2q33   | 1 | 203000000 | 3119 | fs   | fs common |
| chr02 | E | 2q33   | 1 | 203000000 | 4266 | fs   | fs common |

|       |   |      |   |           |      |      |           |
|-------|---|------|---|-----------|------|------|-----------|
| chr02 | E | 2q33 | 1 | 203000000 | 6079 | fs   | fs common |
| chr02 | E | 2q33 | 1 | 203000000 | 5034 | fs   | fs common |
| chr02 | E | 2q33 | 1 | 204000000 | 2870 | fs   | fs common |
| chr02 | E | 2q33 | 1 | 204000000 | 5423 | fs   | fs common |
| chr02 | E | 2q33 | 1 | 204000000 | 4039 | fs   | fs common |
| chr02 | E | 2q33 | 1 | 204000000 | 3198 | fs   | fs common |
| chr02 | E | 2q33 | 1 | 205000000 | 2393 | fs   | fs common |
| chr02 | E | 2q33 | 1 | 205000000 | 1746 | fs   | fs common |
| chr02 | E | 2q33 | 1 | 205000000 | 2224 | fs   | fs common |
| chr02 | E | 2q33 | 1 | 205000000 | 2597 | fs   | fs common |
| chr02 | E | 2q33 | 1 | 206000000 | 3894 | fs   | fs common |
| chr02 | E | 2q33 | 1 | 206000000 | 2332 | fs   | fs common |
| chr02 | E | 2q33 | 1 | 206000000 | 3055 | fs   | fs common |
| chr02 | E | 2q33 | 1 | 206000000 | 1379 | fs   | fs common |
| chr02 | E | 2q33 | 1 | 207000000 | 2818 | fs   | fs common |
| chr02 | E | 2q33 | 1 | 207000000 | 5727 | fs   | fs common |
| chr02 | E | 2q33 | 1 | 207000000 | 5521 | fs   | fs common |
| chr02 | E | 2q33 | 1 | 207000000 | 1136 | fs   | fs common |
| chr02 | E | 2q33 | 1 | 208000000 | 1750 | fs   | fs common |
| chr02 | E | 2q33 | 1 | 208000000 | 1305 | fs   | fs common |
| chr02 | E | 2q33 | 1 | 208000000 | 2178 | fs   | fs common |
| chr02 | E | 2q33 | 1 | 208000000 | 4870 | fs   | fs common |
| chr02 | E | 2q33 | 1 | 209000000 | 3723 | fs   | fs common |
| chr02 | E | 2q33 | 1 | 209000000 | 3031 | fs   | fs common |
| chr02 | E | 2q34 | 1 | 209000000 | 2253 | nofs | nofs      |
| chr02 | E | 2q34 | 1 | 209000000 | 2254 | nofs | nofs      |
| chr02 | E | 2q34 | 1 | 210000000 | 1314 | nofs | nofs      |
| chr02 | E | 2q34 | 1 | 210000000 | 1913 | nofs | nofs      |
| chr02 | E | 2q34 | 1 | 210000000 | 2499 | nofs | nofs      |
| chr02 | E | 2q34 | 1 | 210000000 | 1968 | nofs | nofs      |
| chr02 | E | 2q34 | 1 | 211000000 | 2501 | nofs | nofs      |
| chr02 | E | 2q34 | 1 | 211000000 | 1945 | nofs | nofs      |
| chr02 | E | 2q34 | 1 | 211000000 | 2026 | nofs | nofs      |
| chr02 | E | 2q34 | 1 | 211000000 | 1596 | nofs | nofs      |
| chr02 | E | 2q34 | 1 | 212000000 | 3009 | nofs | nofs      |
| chr02 | E | 2q34 | 1 | 212000000 | 3141 | nofs | nofs      |

|       |   |      |   |           |      |      |      |
|-------|---|------|---|-----------|------|------|------|
| chr02 | E | 2q34 | 1 | 212000000 | 2547 | nofs | nofs |
| chr02 | E | 2q34 | 1 | 212000000 | 2473 | nofs | nofs |
| chr02 | E | 2q34 | 1 | 213000000 | 2679 | nofs | nofs |
| chr02 | E | 2q34 | 1 | 213000000 | 2148 | nofs | nofs |
| chr02 | E | 2q34 | 1 | 213000000 | 2263 | nofs | nofs |
| chr02 | E | 2q34 | 1 | 213000000 | 2525 | nofs | nofs |
| chr02 | E | 2q34 | 1 | 214000000 | 1497 | nofs | nofs |
| chr02 | E | 2q34 | 1 | 214000000 | 1633 | nofs | nofs |
| chr02 | E | 2q34 | 1 | 214000000 | 2470 | nofs | nofs |
| chr02 | E | 2q34 | 1 | 214000000 | 3228 | nofs | nofs |
| chr02 | E | 2q34 | 1 | 215000000 | 3117 | nofs | nofs |
| chr02 | E | 2q34 | 1 | 215000000 | 2282 | nofs | nofs |
| chr02 | E | 2q34 | 1 | 215000000 | 1695 | nofs | nofs |
| chr02 | E | 2q35 | 1 | 215000000 | 2177 | nofs | nofs |
| chr02 | E | 2q35 | 1 | 216000000 | 2637 | nofs | nofs |
| chr02 | E | 2q35 | 1 | 216000000 | 4752 | nofs | nofs |
| chr02 | E | 2q35 | 1 | 216000000 | 2553 | nofs | nofs |
| chr02 | E | 2q35 | 1 | 216000000 | 3247 | nofs | nofs |
| chr02 | E | 2q35 | 1 | 217000000 | 4276 | nofs | nofs |
| chr02 | E | 2q35 | 1 | 217000000 | 4216 | nofs | nofs |
| chr02 | E | 2q35 | 1 | 217000000 | 2354 | nofs | nofs |
| chr02 | E | 2q35 | 1 | 217000000 | 4205 | nofs | nofs |
| chr02 | E | 2q35 | 1 | 218000000 | 2013 | nofs | nofs |
| chr02 | E | 2q35 | 1 | 218000000 | 3669 | nofs | nofs |
| chr02 | E | 2q35 | 1 | 218000000 | 2560 | nofs | nofs |
| chr02 | E | 2q35 | 1 | 218000000 | 4749 | nofs | nofs |
| chr02 | E | 2q35 | 1 | 219000000 | 4012 | nofs | nofs |
| chr02 | E | 2q35 | 1 | 219000000 | 3254 | nofs | nofs |
| chr02 | E | 2q35 | 1 | 219000000 | 1787 | nofs | nofs |
| chr02 | E | 2q35 | 1 | 219000000 | 3234 | nofs | nofs |
| chr02 | E | 2q35 | 1 | 220000000 | 5082 | nofs | nofs |
| chr02 | E | 2q35 | 1 | 220000000 | 2191 | nofs | nofs |
| chr02 | E | 2q35 | 1 | 220000000 | 2574 | nofs | nofs |
| chr02 | E | 2q35 | 1 | 220000000 | 2753 | nofs | nofs |
| chr02 | E | 2q35 | 1 | 221000000 | 1846 | nofs | nofs |
| chr02 | E | 2q35 | 1 | 221000000 | 2875 | nofs | nofs |

|       |   |      |   |           |      |      |      |
|-------|---|------|---|-----------|------|------|------|
| chr02 | E | 2q35 | 1 | 221000000 | 2711 | nofs | nofs |
| chr02 | E | 2q35 | 1 | 221000000 | 2598 | nofs | nofs |
| chr02 | E | 2q36 | 3 | 222000000 | 3070 | nofs | nofs |
| chr02 | E | 2q36 | 3 | 222000000 | 1760 | nofs | nofs |
| chr02 | E | 2q36 | 3 | 222000000 | 6485 | nofs | nofs |
| chr02 | E | 2q36 | 3 | 222000000 | 3110 | nofs | nofs |
| chr02 | E | 2q36 | 3 | 223000000 | 2660 | nofs | nofs |
| chr02 | E | 2q36 | 3 | 223000000 | 2944 | nofs | nofs |
| chr02 | E | 2q36 | 3 | 223000000 | 3793 | nofs | nofs |
| chr02 | E | 2q36 | 3 | 223000000 | 2729 | nofs | nofs |
| chr02 | E | 2q36 | 3 | 224000000 | 5111 | nofs | nofs |
| chr02 | E | 2q36 | 3 | 224000000 | 2785 | nofs | nofs |
| chr02 | E | 2q36 | 3 | 224000000 | 1964 | nofs | nofs |
| chr02 | E | 2q36 | 3 | 224000000 | 3010 | nofs | nofs |
| chr02 | E | 2q36 | 3 | 225000000 | 3185 | nofs | nofs |
| chr02 | E | 2q36 | 3 | 225000000 | 2463 | nofs | nofs |
| chr02 | E | 2q36 | 3 | 225000000 | 1989 | nofs | nofs |
| chr02 | E | 2q36 | 3 | 225000000 | 4761 | nofs | nofs |
| chr02 | E | 2q36 | 3 | 226000000 | 4124 | nofs | nofs |
| chr02 | E | 2q36 | 3 | 226000000 | 3711 | nofs | nofs |
| chr02 | E | 2q36 | 3 | 226000000 | 2683 | nofs | nofs |
| chr02 | E | 2q36 | 3 | 226000000 | 4138 | nofs | nofs |
| chr02 | E | 2q36 | 3 | 227000000 | 2964 | nofs | nofs |
| chr02 | E | 2q36 | 3 | 227000000 | 2820 | nofs | nofs |
| chr02 | E | 2q36 | 3 | 227000000 | 5062 | nofs | nofs |
| chr02 | E | 2q36 | 3 | 227000000 | 3033 | nofs | nofs |
| chr02 | E | 2q36 | 3 | 228000000 | 1951 | nofs | nofs |
| chr02 | E | 2q36 | 3 | 228000000 | 3103 | nofs | nofs |
| chr02 | E | 2q36 | 3 | 228000000 | 3101 | nofs | nofs |
| chr02 | E | 2q36 | 3 | 228000000 | 4099 | nofs | nofs |
| chr02 | E | 2q36 | 3 | 229000000 | 2897 | nofs | nofs |
| chr02 | E | 2q36 | 3 | 229000000 | 4990 | nofs | nofs |
| chr02 | E | 2q36 | 3 | 229000000 | 3255 | nofs | nofs |
| chr02 | E | 2q36 | 3 | 229000000 | 2880 | nofs | nofs |
| chr02 | E | 2q36 | 3 | 230000000 | 2111 | nofs | nofs |
| chr02 | E | 2q36 | 3 | 230000000 | 3224 | nofs | nofs |

|       |   |        |   |           |       |      |           |
|-------|---|--------|---|-----------|-------|------|-----------|
| chr02 | E | 2q36   | 3 | 230000000 | 3109  | nofs | nofs      |
| chr02 | E | 2q36   | 3 | 230000000 | 5749  | nofs | nofs      |
| chr02 | E | 2q36   | 3 | 231000000 | 2546  | nofs | nofs      |
| chr02 | E | 2q36   | 3 | 231000000 | 3464  | nofs | nofs      |
| chr02 | E | 2q37.1 | 2 | 231000000 | 2234  | nofs | nofs      |
| chr02 | E | 2q37.1 | 2 | 231000000 | 2924  | nofs | nofs      |
| chr02 | E | 2q37.1 | 2 | 232000000 | 4574  | nofs | nofs      |
| chr02 | E | 2q37.1 | 2 | 232000000 | 3298  | nofs | nofs      |
| chr02 | E | 2q37.1 | 2 | 232000000 | 5101  | nofs | nofs      |
| chr02 | E | 2q37.1 | 2 | 232000000 | 4655  | nofs | nofs      |
| chr02 | E | 2q37.1 | 2 | 233000000 | 30263 | nofs | nofs      |
| chr02 | E | 2q37.1 | 2 | 233000000 | 2232  | nofs | nofs      |
| chr02 | E | 2q37.1 | 2 | 233000000 | 2855  | nofs | nofs      |
| chr02 | E | 2q37.1 | 2 | 233000000 | 3669  | nofs | nofs      |
| chr02 | E | 2q37.1 | 2 | 234000000 | 9237  | nofs | nofs      |
| chr02 | E | 2q37.1 | 2 | 234000000 | 5154  | nofs | nofs      |
| chr02 | E | 2q37.1 | 2 | 234000000 | 3804  | nofs | nofs      |
| chr02 | E | 2q37.1 | 2 | 234000000 | 4577  | nofs | nofs      |
| chr02 | E | 2q37.1 | 2 | 235000000 | 3926  | nofs | nofs      |
| chr02 | E | 2q37.1 | 2 | 235000000 | 5183  | nofs | nofs      |
| chr02 | E | 2q37.1 | 2 | 235000000 | 4958  | nofs | nofs      |
| chr02 | E | 2q37.1 | 2 | 235000000 | 8393  | nofs | nofs      |
| chr02 | E | 2q37.2 | 1 | 236000000 | 5960  | nofs | nofs      |
| chr02 | E | 2q37.2 | 1 | 236000000 | 5264  | nofs | nofs      |
| chr02 | E | 2q37.2 | 1 | 236000000 | 5594  | nofs | nofs      |
| chr02 | E | 2q37.2 | 1 | 236000000 | 6957  | nofs | nofs      |
| chr02 | E | 2q37.2 | 1 | 237000000 | 3338  | nofs | nofs      |
| chr02 | E | 2q37.2 | 1 | 237000000 | 3930  | nofs | nofs      |
| chr02 | E | 2q37.3 | 2 | 237000000 | 6639  | fs   | fs common |
| chr02 | E | 2q37.3 | 2 | 237000000 | 6716  | fs   | fs common |
| chr02 | E | 2q37.3 | 2 | 238000000 | 5232  | fs   | fs common |
| chr02 | E | 2q37.3 | 2 | 238000000 | 3372  | fs   | fs common |
| chr02 | E | 2q37.3 | 2 | 238000000 | 9473  | fs   | fs common |
| chr02 | E | 2q37.3 | 2 | 238000000 | 3980  | fs   | fs common |
| chr02 | E | 2q37.3 | 2 | 239000000 | 3713  | fs   | fs common |
| chr02 | E | 2q37.3 | 2 | 239000000 | 7971  | fs   | fs common |

|       |   |        |   |           |       |      |           |
|-------|---|--------|---|-----------|-------|------|-----------|
| chr02 | E | 2q37.3 | 2 | 239000000 | 25292 | fs   | fs common |
| chr02 | E | 2q37.3 | 2 | 239000000 | 9196  | fs   | fs common |
| chr02 | T | 2q37.3 | 2 | 240000000 | 9041  | fs   | fs common |
| chr02 | T | 2q37.3 | 2 | 240000000 | 11546 | fs   | fs common |
| chr02 | T | 2q37.3 | 2 | 240000000 | 10364 | fs   | fs common |
| chr02 | T | 2q37.3 | 2 | 240000000 | 17035 | fs   | fs common |
| chr02 | T | 2q37.3 | 2 | 241000000 | 10827 | fs   | fs common |
| chr02 | T | 2q37.3 | 2 | 241000000 | 15570 | fs   | fs common |
| chr02 | T | 2q37.3 | 2 | 241000000 | 9747  | fs   | fs common |
| chr02 | T | 2q37.3 | 2 | 241000000 | 12805 | fs   | fs common |
| chr02 | T | 2q37.3 | 2 | 242000000 | 19057 | fs   | fs common |
| chr02 | T | 2q37.3 | 2 | 242000000 | 8236  | fs   | fs common |
| chr02 | T | 2q37.3 | 2 | 242000000 | 10882 | fs   | fs common |
| chr02 | T | 2q37.3 | 2 | 242000000 | 20804 | fs   | fs common |
| chr02 | T | 2q37.3 | 2 | 243000000 | 23063 | fs   | fs common |
| chr03 | T | 3p25   | 6 | 125000    | 2999  | nofs | nofs      |
| chr03 | T | 3p25   | 6 | 375000    | 3788  | nofs | nofs      |
| chr03 | T | 3p25   | 6 | 625000    | 2641  | nofs | nofs      |
| chr03 | T | 3p25   | 6 | 875000    | 5923  | nofs | nofs      |
| chr03 | T | 3p25   | 6 | 1125000   | 3671  | nofs | nofs      |
| chr03 | T | 3p25   | 6 | 1375000   | 3151  | nofs | nofs      |
| chr03 | T | 3p25   | 6 | 1625000   | 4699  | nofs | nofs      |
| chr03 | T | 3p25   | 6 | 1875000   | 2243  | nofs | nofs      |
| chr03 | T | 3p25   | 6 | 2125000   | 2427  | nofs | nofs      |
| chr03 | T | 3p25   | 6 | 2375000   | 2948  | nofs | nofs      |
| chr03 | T | 3p25   | 6 | 2625000   | 2293  | nofs | nofs      |
| chr03 | T | 3p25   | 6 | 2875000   | 1784  | nofs | nofs      |
| chr03 | T | 3p25   | 6 | 3125000   | 1671  | nofs | nofs      |
| chr03 | E | 3p25   | 6 | 3375000   | 2497  | nofs | nofs      |
| chr03 | E | 3p25   | 6 | 3625000   | 1474  | nofs | nofs      |
| chr03 | E | 3p25   | 6 | 3875000   | 2352  | nofs | nofs      |
| chr03 | E | 3p25   | 6 | 4125000   | 2063  | nofs | nofs      |
| chr03 | E | 3p25   | 6 | 4375000   | 2656  | nofs | nofs      |
| chr03 | E | 3p25   | 6 | 4625000   | 1920  | nofs | nofs      |
| chr03 | E | 3p25   | 6 | 4875000   | 2607  | nofs | nofs      |
| chr03 | E | 3p25   | 6 | 5125000   | 4067  | nofs | nofs      |

|       |   |      |   |          |       |      |      |
|-------|---|------|---|----------|-------|------|------|
| chr03 | E | 3p25 | 6 | 5375000  | 2546  | nofs | nofs |
| chr03 | E | 3p25 | 6 | 5625000  | 2581  | nofs | nofs |
| chr03 | E | 3p25 | 6 | 5875000  | 1971  | nofs | nofs |
| chr03 | E | 3p25 | 6 | 6125000  | 2956  | nofs | nofs |
| chr03 | E | 3p25 | 6 | 6375000  | 2853  | nofs | nofs |
| chr03 | E | 3p25 | 6 | 6625000  | 3332  | nofs | nofs |
| chr03 | E | 3p25 | 6 | 6875000  | 1735  | nofs | nofs |
| chr03 | E | 3p25 | 6 | 7125000  | 2623  | nofs | nofs |
| chr03 | E | 3p25 | 6 | 7375000  | 3140  | nofs | nofs |
| chr03 | E | 3p25 | 6 | 7625000  | 1916  | nofs | nofs |
| chr03 | E | 3p25 | 6 | 7875000  | 1764  | nofs | nofs |
| chr03 | E | 3p25 | 6 | 8125000  | 3723  | nofs | nofs |
| chr03 | E | 3p25 | 6 | 8375000  | 5161  | nofs | nofs |
| chr03 | E | 3p25 | 6 | 8625000  | 10799 | nofs | nofs |
| chr03 | E | 3p25 | 6 | 8875000  | 3068  | nofs | nofs |
| chr03 | E | 3p25 | 6 | 9125000  | 1723  | nofs | nofs |
| chr03 | E | 3p25 | 6 | 9375000  | 1873  | nofs | nofs |
| chr03 | E | 3p25 | 6 | 9625000  | 5062  | nofs | nofs |
| chr03 | E | 3p25 | 6 | 9875000  | 4516  | nofs | nofs |
| chr03 | E | 3p25 | 6 | 10125000 | 4487  | nofs | nofs |
| chr03 | E | 3p25 | 6 | 10375000 | 3434  | nofs | nofs |
| chr03 | E | 3p25 | 6 | 10625000 | 3572  | nofs | nofs |
| chr03 | E | 3p25 | 6 | 10875000 | 2794  | nofs | nofs |
| chr03 | E | 3p25 | 6 | 11125000 | 5532  | nofs | nofs |
| chr03 | E | 3p25 | 6 | 11375000 | 3340  | nofs | nofs |
| chr03 | E | 3p25 | 6 | 11625000 | 4394  | nofs | nofs |
| chr03 | E | 3p25 | 6 | 11875000 | 6053  | nofs | nofs |
| chr03 | E | 3p25 | 6 | 12125000 | 1085  | nofs | nofs |
| chr03 | E | 3p25 | 6 | 12375000 | 2925  | nofs | nofs |
| chr03 | E | 3p25 | 6 | 12625000 | 2433  | nofs | nofs |
| chr03 | E | 3p25 | 6 | 12875000 | 3977  | nofs | nofs |
| chr03 | E | 3p25 | 6 | 13125000 | 3123  | nofs | nofs |
| chr03 | E | 3p25 | 6 | 13375000 | 2582  | nofs | nofs |
| chr03 | E | 3p25 | 6 | 13625000 | 8047  | nofs | nofs |
| chr03 | E | 3p25 | 6 | 13875000 | 4426  | nofs | nofs |
| chr03 | E | 3p25 | 6 | 14125000 | 4277  | nofs | nofs |



|       |   |      |   |          |      |      |      |
|-------|---|------|---|----------|------|------|------|
| chr03 | E | 3p25 | 6 | 14375000 | 3285 | nofs | nofs |
| chr03 | E | 3p25 | 6 | 14625000 | 1929 | nofs | nofs |
| chr03 | E | 3p25 | 6 | 14875000 | 2899 | nofs | nofs |
| chr03 | E | 3p25 | 6 | 15125000 | 3969 | nofs | nofs |
| chr03 | E | 3p25 | 6 | 15375000 | 2367 | nofs | nofs |
| chr03 | E | 3p25 | 6 | 15625000 | 3114 | nofs | nofs |
| chr03 | E | 3p25 | 6 | 15875000 | 2945 | nofs | nofs |
| chr03 | E | 3p25 | 6 | 16125000 | 2387 | nofs | nofs |
| chr03 | E | 3p25 | 6 | 16375000 | 2851 | nofs | nofs |
| chr03 | E | 3p24 | 2 | 16625000 | 2921 | nofs | nofs |
| chr03 | E | 3p24 | 2 | 16875000 | 2201 | nofs | nofs |
| chr03 | E | 3p24 | 2 | 17125000 | 1495 | nofs | nofs |
| chr03 | E | 3p24 | 2 | 17375000 | 2343 | nofs | nofs |
| chr03 | E | 3p24 | 2 | 17625000 | 3102 | nofs | nofs |
| chr03 | E | 3p24 | 2 | 17875000 | 3459 | nofs | nofs |
| chr03 | E | 3p24 | 2 | 18125000 | 1363 | nofs | nofs |
| chr03 | E | 3p24 | 2 | 18375000 | 1662 | nofs | nofs |
| chr03 | E | 3p24 | 2 | 18625000 | 2132 | nofs | nofs |
| chr03 | E | 3p24 | 2 | 18875000 | 4069 | nofs | nofs |
| chr03 | E | 3p24 | 2 | 19125000 | 1960 | nofs | nofs |
| chr03 | E | 3p24 | 2 | 19375000 | 2366 | nofs | nofs |
| chr03 | E | 3p24 | 2 | 19625000 | 1615 | nofs | nofs |
| chr03 | E | 3p24 | 2 | 19875000 | 3280 | nofs | nofs |
| chr03 | E | 3p24 | 2 | 20125000 | 4010 | nofs | nofs |
| chr03 | E | 3p24 | 2 | 20375000 | 2327 | nofs | nofs |
| chr03 | E | 3p24 | 2 | 20625000 | 1410 | nofs | nofs |
| chr03 | E | 3p24 | 2 | 20875000 | 3919 | nofs | nofs |
| chr03 | E | 3p24 | 2 | 21125000 | 2306 | nofs | nofs |
| chr03 | E | 3p24 | 2 | 21375000 | 2831 | nofs | nofs |
| chr03 | E | 3p24 | 2 | 21625000 | 2072 | nofs | nofs |
| chr03 | E | 3p24 | 2 | 21875000 | 1744 | nofs | nofs |
| chr03 | E | 3p24 | 2 | 22125000 | 1403 | nofs | nofs |
| chr03 | E | 3p24 | 2 | 22375000 | 2396 | nofs | nofs |
| chr03 | E | 3p24 | 2 | 22625000 | 1784 | nofs | nofs |
| chr03 | E | 3p24 | 2 | 22875000 | 2621 | nofs | nofs |
| chr03 | E | 3p24 | 2 | 23125000 | 2127 | nofs | nofs |

|       |   |      |   |          |      |      |           |
|-------|---|------|---|----------|------|------|-----------|
| chr03 | E | 3p24 | 2 | 23375000 | 1516 | nofs | nofs      |
| chr03 | E | 3p24 | 2 | 23625000 | 2779 | nofs | nofs      |
| chr03 | E | 3p24 | 2 | 23875000 | 2701 | fs   | fs common |
| chr03 | E | 3p24 | 2 | 24125000 | 1880 | fs   | fs common |
| chr03 | E | 3p24 | 2 | 24375000 | 1947 | fs   | fs common |
| chr03 | E | 3p24 | 2 | 24625000 | 1944 | fs   | fs common |
| chr03 | E | 3p24 | 2 | 24875000 | 1615 | fs   | fs common |
| chr03 | E | 3p24 | 2 | 25125000 | 1468 | fs   | fs common |
| chr03 | E | 3p24 | 2 | 25375000 | 1129 | fs   | fs common |
| chr03 | E | 3p24 | 2 | 25625000 | 1835 | fs   | fs common |
| chr03 | E | 3p24 | 2 | 25875000 | 2309 | fs   | fs common |
| chr03 | E | 3p24 | 2 | 26125000 | 2326 | fs   | fs common |
| chr03 | E | 3p24 | 2 | 26375000 | 1258 | fs   | fs common |
| chr03 | E | 3p24 | 2 | 26625000 | 1679 | fs   | fs common |
| chr03 | E | 3p24 | 2 | 26875000 | 1653 | fs   | fs common |
| chr03 | E | 3p24 | 2 | 27125000 | 1906 | fs   | fs common |
| chr03 | E | 3p24 | 2 | 27375000 | 2602 | fs   | fs common |
| chr03 | E | 3p24 | 2 | 27625000 | 3075 | nofs | nofs      |
| chr03 | E | 3p24 | 2 | 27875000 | 3273 | nofs | nofs      |
| chr03 | E | 3p24 | 2 | 28125000 | 2133 | nofs | nofs      |
| chr03 | E | 3p24 | 2 | 28375000 | 2232 | nofs | nofs      |
| chr03 | E | 3p24 | 2 | 28625000 | 2657 | nofs | nofs      |
| chr03 | E | 3p24 | 2 | 28875000 | 2790 | nofs | nofs      |
| chr03 | E | 3p24 | 2 | 29125000 | 1571 | nofs | nofs      |
| chr03 | E | 3p24 | 2 | 29375000 | 2744 | nofs | nofs      |
| chr03 | E | 3p24 | 2 | 29625000 | 2292 | nofs | nofs      |
| chr03 | E | 3p24 | 2 | 29875000 | 2565 | nofs | nofs      |
| chr03 | E | 3p24 | 2 | 30125000 | 3779 | nofs | nofs      |
| chr03 | E | 3p24 | 2 | 30375000 | 1740 | nofs | nofs      |
| chr03 | E | 3p24 | 2 | 30625000 | 2735 | nofs | nofs      |
| chr03 | E | 3p24 | 2 | 30875000 | 1428 | nofs | nofs      |
| chr03 | E | 3p24 | 2 | 31125000 | 1368 | nofs | nofs      |
| chr03 | E | 3p24 | 2 | 31375000 | 2521 | nofs | nofs      |
| chr03 | E | 3p24 | 2 | 31625000 | 1794 | nofs | nofs      |
| chr03 | E | 3p24 | 2 | 31875000 | 3385 | nofs | nofs      |
| chr03 | E | 3p24 | 2 | 32125000 | 4122 | nofs | nofs      |

|       |   |      |   |          |      |      |      |
|-------|---|------|---|----------|------|------|------|
| chr03 | E | 3p24 | 2 | 32375000 | 2314 | nofs | nofs |
| chr03 | E | 3p23 | 2 | 32625000 | 4468 | nofs | nofs |
| chr03 | E | 3p23 | 2 | 32875000 | 4626 | nofs | nofs |
| chr03 | E | 3p23 | 2 | 33125000 | 4070 | nofs | nofs |
| chr03 | E | 3p23 | 2 | 33375000 | 3688 | nofs | nofs |
| chr03 | E | 3p23 | 2 | 33625000 | 2009 | nofs | nofs |
| chr03 | E | 3p23 | 2 | 33875000 | 3820 | nofs | nofs |
| chr03 | E | 3p23 | 2 | 34125000 | 1522 | nofs | nofs |
| chr03 | E | 3p23 | 2 | 34375000 | 2563 | nofs | nofs |
| chr03 | E | 3p23 | 2 | 34625000 | 4667 | nofs | nofs |
| chr03 | E | 3p23 | 2 | 34875000 | 1688 | nofs | nofs |
| chr03 | E | 3p22 | 4 | 35125000 | 3179 | nofs | nofs |
| chr03 | E | 3p22 | 4 | 35375000 | 2260 | nofs | nofs |
| chr03 | E | 3p22 | 4 | 35625000 | 2957 | nofs | nofs |
| chr03 | E | 3p22 | 4 | 35875000 | 2223 | nofs | nofs |
| chr03 | E | 3p22 | 4 | 36125000 | 2197 | nofs | nofs |
| chr03 | E | 3p22 | 4 | 36375000 | 3148 | nofs | nofs |
| chr03 | E | 3p22 | 4 | 36625000 | 1596 | nofs | nofs |
| chr03 | E | 3p22 | 4 | 36875000 | 3741 | nofs | nofs |
| chr03 | E | 3p22 | 4 | 37125000 | 3354 | nofs | nofs |
| chr03 | E | 3p22 | 4 | 37375000 | 2296 | nofs | nofs |
| chr03 | E | 3p22 | 4 | 37625000 | 1721 | nofs | nofs |
| chr03 | E | 3p22 | 4 | 37875000 | 1839 | nofs | nofs |
| chr03 | E | 3p22 | 4 | 38125000 | 7391 | nofs | nofs |
| chr03 | E | 3p22 | 4 | 38375000 | 2596 | nofs | nofs |
| chr03 | E | 3p22 | 4 | 38625000 | 1639 | nofs | nofs |
| chr03 | E | 3p22 | 4 | 38875000 | 2850 | nofs | nofs |
| chr03 | E | 3p22 | 4 | 39125000 | 3027 | nofs | nofs |
| chr03 | E | 3p22 | 4 | 39375000 | 3123 | nofs | nofs |
| chr03 | E | 3p22 | 4 | 39625000 | 4576 | nofs | nofs |
| chr03 | E | 3p22 | 4 | 39875000 | 1506 | nofs | nofs |
| chr03 | E | 3p22 | 4 | 40125000 | 3812 | nofs | nofs |
| chr03 | E | 3p22 | 4 | 40375000 | 2297 | nofs | nofs |
| chr03 | E | 3p22 | 4 | 40625000 | 2210 | nofs | nofs |
| chr03 | E | 3p22 | 4 | 40875000 | 2065 | nofs | nofs |
| chr03 | E | 3p22 | 4 | 41125000 | 1517 | nofs | nofs |

|       |   |        |   |          |       |      |      |
|-------|---|--------|---|----------|-------|------|------|
| chr03 | E | 3p22   | 4 | 41375000 | 2696  | nofs | nofs |
| chr03 | E | 3p22   | 4 | 41625000 | 1614  | nofs | nofs |
| chr03 | E | 3p22   | 4 | 41875000 | 3561  | nofs | nofs |
| chr03 | E | 3p22   | 4 | 42125000 | 2500  | nofs | nofs |
| chr03 | E | 3p22   | 4 | 42375000 | 2683  | nofs | nofs |
| chr03 | E | 3p22   | 4 | 42625000 | 2330  | nofs | nofs |
| chr03 | E | 3p22   | 4 | 42875000 | 5072  | nofs | nofs |
| chr03 | E | 3p22   | 4 | 43125000 | 8180  | nofs | nofs |
| chr03 | E | 3p22   | 4 | 43375000 | 1887  | nofs | nofs |
| chr03 | E | 3p22   | 4 | 43625000 | 2385  | nofs | nofs |
| chr03 | E | 3p21.3 | 4 | 43875000 | 2163  | nofs | nofs |
| chr03 | E | 3p21.3 | 4 | 44125000 | 1964  | nofs | nofs |
| chr03 | E | 3p21.3 | 4 | 44375000 | 1733  | nofs | nofs |
| chr03 | E | 3p21.3 | 4 | 44625000 | 5611  | nofs | nofs |
| chr03 | E | 3p21.3 | 4 | 44875000 | 3299  | nofs | nofs |
| chr03 | E | 3p21.3 | 4 | 45125000 | 2394  | nofs | nofs |
| chr03 | E | 3p21.3 | 4 | 45375000 | 2328  | nofs | nofs |
| chr03 | E | 3p21.3 | 4 | 45625000 | 1509  | nofs | nofs |
| chr03 | E | 3p21.3 | 4 | 45875000 | 1378  | nofs | nofs |
| chr03 | E | 3p21.3 | 4 | 46125000 | 1963  | nofs | nofs |
| chr03 | E | 3p21.3 | 4 | 46375000 | 2689  | nofs | nofs |
| chr03 | E | 3p21.3 | 4 | 46625000 | 4140  | nofs | nofs |
| chr03 | E | 3p21.3 | 4 | 46875000 | 2911  | nofs | nofs |
| chr03 | E | 3p21.3 | 4 | 47125000 | 2086  | nofs | nofs |
| chr03 | E | 3p21.3 | 4 | 47375000 | 3597  | nofs | nofs |
| chr03 | E | 3p21.3 | 4 | 47625000 | 3419  | nofs | nofs |
| chr03 | E | 3p21.3 | 4 | 47875000 | 5574  | nofs | nofs |
| chr03 | E | 3p21.3 | 4 | 48125000 | 7428  | nofs | nofs |
| chr03 | E | 3p21.3 | 4 | 48375000 | 2307  | nofs | nofs |
| chr03 | E | 3p21.3 | 4 | 48625000 | 5432  | nofs | nofs |
| chr03 | E | 3p21.3 | 4 | 48875000 | 8156  | nofs | nofs |
| chr03 | E | 3p21.3 | 4 | 49125000 | 6395  | nofs | nofs |
| chr03 | E | 3p21.3 | 4 | 49375000 | 12084 | nofs | nofs |
| chr03 | E | 3p21.3 | 4 | 49625000 | 4996  | nofs | nofs |
| chr03 | E | 3p21.3 | 4 | 49875000 | 5840  | nofs | nofs |
| chr03 | E | 3p21.3 | 4 | 50125000 | 3621  | nofs | nofs |

|       |   |        |   |          |      |      |           |
|-------|---|--------|---|----------|------|------|-----------|
| chr03 | E | 3p21.3 | 4 | 50375000 | 3278 | nofs | nofs      |
| chr03 | E | 3p21.3 | 4 | 50625000 | 1367 | nofs | nofs      |
| chr03 | E | 3p21.3 | 4 | 50875000 | 3229 | nofs | nofs      |
| chr03 | E | 3p21.3 | 4 | 51125000 | 2601 | nofs | nofs      |
| chr03 | E | 3p21.3 | 4 | 51375000 | 3595 | nofs | nofs      |
| chr03 | E | 3p21.2 | 3 | 51625000 | 4863 | nofs | nofs      |
| chr03 | E | 3p21.2 | 3 | 51875000 | 4206 | nofs | nofs      |
| chr03 | E | 3p21.2 | 3 | 52125000 | 4564 | nofs | nofs      |
| chr03 | E | 3p21.2 | 3 | 52375000 | 3172 | nofs | nofs      |
| chr03 | B | 3p21.1 | . | 52625000 | 3408 | nofs | nofs      |
| chr03 | B | 3p21.1 | . | 52875000 | 3718 | nofs | nofs      |
| chr03 | B | 3p21.1 | . | 53125000 | 3755 | nofs | nofs      |
| chr03 | B | 3p21.1 | . | 53375000 | 2098 | nofs | nofs      |
| chr03 | B | 3p21.1 | . | 53625000 | 1812 | nofs | nofs      |
| chr03 | B | 3p21.1 | . | 53875000 | 3163 | nofs | nofs      |
| chr03 | B | 3p21.1 | . | 54125000 | 2480 | nofs | nofs      |
| chr03 | B | 3p21.1 | . | 54375000 | 2469 | nofs | nofs      |
| chr03 | E | 3p14.3 | 2 | 54625000 | 2663 | nofs | nofs      |
| chr03 | E | 3p14.3 | 2 | 54875000 | 2334 | nofs | nofs      |
| chr03 | E | 3p14.3 | 2 | 55125000 | 1779 | nofs | nofs      |
| chr03 | E | 3p14.3 | 2 | 55375000 | 1470 | nofs | nofs      |
| chr03 | E | 3p14.3 | 2 | 55625000 | 2222 | nofs | nofs      |
| chr03 | E | 3p14.3 | 2 | 55875000 | 2558 | nofs | nofs      |
| chr03 | E | 3p14.3 | 2 | 56125000 | 2131 | nofs | nofs      |
| chr03 | E | 3p14.3 | 2 | 56375000 | 2830 | nofs | nofs      |
| chr03 | E | 3p14.3 | 2 | 56625000 | 6508 | nofs | nofs      |
| chr03 | E | 3p14.3 | 2 | 56875000 | 3930 | nofs | nofs      |
| chr03 | E | 3p14.3 | 2 | 57125000 | 3527 | nofs | nofs      |
| chr03 | E | 3p14.3 | 2 | 57375000 | 3280 | nofs | nofs      |
| chr03 | E | 3p14.3 | 2 | 57625000 | 4989 | nofs | nofs      |
| chr03 | E | 3p14.3 | 2 | 57875000 | 4848 | nofs | nofs      |
| chr03 | E | 3p14.3 | 2 | 58125000 | 3422 | nofs | nofs      |
| chr03 | E | 3p14.3 | 2 | 58375000 | 3036 | nofs | nofs      |
| chr03 | E | 3p14.3 | 2 | 58625000 | 4264 | fs   | fs common |
| chr03 | B | 3p14.2 | . | 58875000 | 3722 | fs   | fs common |
| chr03 | B | 3p14.2 | . | 59125000 | 2129 | fs   | fs common |

|       |   |        |   |          |      |      |           |
|-------|---|--------|---|----------|------|------|-----------|
| chr03 | B | 3p14.2 | . | 59375000 | 2344 | fs   | fs common |
| chr03 | B | 3p14.2 | . | 59625000 | 1968 | fs   | fs common |
| chr03 | B | 3p14.2 | . | 59875000 | 1737 | fs   | fs common |
| chr03 | B | 3p14.2 | . | 60125000 | 1725 | fs   | fs common |
| chr03 | B | 3p14.2 | . | 60375000 | 1264 | fs   | fs common |
| chr03 | B | 3p14.2 | . | 60625000 | 1663 | fs   | fs common |
| chr03 | B | 3p14.2 | . | 60875000 | 3450 | fs   | fs common |
| chr03 | B | 3p14.2 | . | 61125000 | 1565 | fs   | fs common |
| chr03 | B | 3p14.2 | . | 61375000 | 4569 | fs   | fs common |
| chr03 | B | 3p14.2 | . | 61625000 | 2061 | fs   | fs common |
| chr03 | B | 3p14.2 | . | 61875000 | 2578 | fs   | fs common |
| chr03 | B | 3p14.2 | . | 62125000 | 2039 | fs   | fs common |
| chr03 | B | 3p14.2 | . | 62375000 | 2146 | fs   | fs common |
| chr03 | B | 3p14.2 | . | 62625000 | 2003 | fs   | fs common |
| chr03 | B | 3p14.2 | . | 62875000 | 1636 | fs   | fs common |
| chr03 | B | 3p14.2 | . | 63125000 | 3910 | fs   | fs common |
| chr03 | B | 3p14.2 | . | 63375000 | 2673 | fs   | fs common |
| chr03 | B | 3p14.2 | . | 63625000 | 3008 | fs   | fs common |
| chr03 | E | 3p14.1 | 2 | 63875000 | 1656 | nofs | nofs      |
| chr03 | E | 3p14.1 | 2 | 64125000 | 2803 | nofs | nofs      |
| chr03 | E | 3p14.1 | 2 | 64375000 | 1997 | nofs | nofs      |
| chr03 | E | 3p14.1 | 2 | 64625000 | 1947 | nofs | nofs      |
| chr03 | E | 3p14.1 | 2 | 64875000 | 1630 | nofs | nofs      |
| chr03 | E | 3p14.1 | 2 | 65125000 | 3032 | nofs | nofs      |
| chr03 | E | 3p14.1 | 2 | 65375000 | 2903 | nofs | nofs      |
| chr03 | E | 3p14.1 | 2 | 65625000 | 2727 | nofs | nofs      |
| chr03 | E | 3p14.1 | 2 | 65875000 | 2397 | nofs | nofs      |
| chr03 | E | 3p14.1 | 2 | 66125000 | 1521 | nofs | nofs      |
| chr03 | E | 3p14.1 | 2 | 66375000 | 936  | nofs | nofs      |
| chr03 | E | 3p14.1 | 2 | 66625000 | 2696 | nofs | nofs      |
| chr03 | E | 3p14.1 | 2 | 66875000 | 3926 | nofs | nofs      |
| chr03 | E | 3p14.1 | 2 | 67125000 | 3144 | nofs | nofs      |
| chr03 | E | 3p14.1 | 2 | 67375000 | 1641 | nofs | nofs      |
| chr03 | E | 3p14.1 | 2 | 67625000 | 2809 | nofs | nofs      |
| chr03 | E | 3p14.1 | 2 | 67875000 | 1840 | nofs | nofs      |
| chr03 | E | 3p14.1 | 2 | 68125000 | 1913 | nofs | nofs      |

|       |   |        |   |          |       |      |      |
|-------|---|--------|---|----------|-------|------|------|
| chr03 | E | 3p14.1 | 2 | 68375000 | 2087  | nofs | nofs |
| chr03 | E | 3p14.1 | 2 | 68625000 | 1795  | nofs | nofs |
| chr03 | E | 3p14.1 | 2 | 68875000 | 2004  | nofs | nofs |
| chr03 | E | 3p14.1 | 2 | 69125000 | 2594  | nofs | nofs |
| chr03 | E | 3p14.1 | 2 | 69375000 | 3341  | nofs | nofs |
| chr03 | E | 3p14.1 | 2 | 69625000 | 3291  | nofs | nofs |
| chr03 | E | 3p14.1 | 2 | 69875000 | 3929  | nofs | nofs |
| chr03 | B | 3p13   | . | 70125000 | 1964  | nofs | nofs |
| chr03 | B | 3p13   | . | 70375000 | 2619  | nofs | nofs |
| chr03 | B | 3p13   | . | 70625000 | 1585  | nofs | nofs |
| chr03 | B | 3p13   | . | 70875000 | 1828  | nofs | nofs |
| chr03 | B | 3p13   | . | 71125000 | 1913  | nofs | nofs |
| chr03 | B | 3p13   | . | 71375000 | 2004  | nofs | nofs |
| chr03 | B | 3p13   | . | 71625000 | 2714  | nofs | nofs |
| chr03 | B | 3p13   | . | 71875000 | 1701  | nofs | nofs |
| chr03 | B | 3p13   | . | 72125000 | 3331  | nofs | nofs |
| chr03 | B | 3p13   | . | 72375000 | 2855  | nofs | nofs |
| chr03 | B | 3p13   | . | 72625000 | 2059  | nofs | nofs |
| chr03 | B | 3p13   | . | 72875000 | 3778  | nofs | nofs |
| chr03 | B | 3p13   | . | 73125000 | 3505  | nofs | nofs |
| chr03 | B | 3p13   | . | 73375000 | 3981  | nofs | nofs |
| chr03 | B | 3p13   | . | 73625000 | 1432  | nofs | nofs |
| chr03 | B | 3p13   | . | 73875000 | 1968  | nofs | nofs |
| chr03 | B | 3p13   | . | 74125000 | 1000  | nofs | nofs |
| chr03 | E | 3p12   | 5 | 74375000 | 1793  | nofs | nofs |
| chr03 | E | 3p12   | 5 | 74625000 | 1702  | nofs | nofs |
| chr03 | E | 3p12   | 5 | 74875000 | 3067  | nofs | nofs |
| chr03 | E | 3p12   | 5 | 75125000 | 3148  | nofs | nofs |
| chr03 | E | 3p12   | 5 | 75375000 | 4386  | nofs | nofs |
| chr03 | E | 3p12   | 5 | 75625000 | 8102  | nofs | nofs |
| chr03 | E | 3p12   | 5 | 75875000 | 15252 | nofs | nofs |
| chr03 | E | 3p12   | 5 | 76125000 | 7389  | nofs | nofs |
| chr03 | E | 3p12   | 5 | 76375000 | 6416  | nofs | nofs |
| chr03 | E | 3p12   | 5 | 76625000 | 3069  | nofs | nofs |
| chr03 | E | 3p12   | 5 | 76875000 | 4788  | nofs | nofs |
| chr03 | E | 3p12   | 5 | 77125000 | 3433  | nofs | nofs |

|       |   |      |   |          |       |      |      |
|-------|---|------|---|----------|-------|------|------|
| chr03 | E | 3p12 | 5 | 77375000 | 11097 | nofs | nofs |
| chr03 | E | 3p12 | 5 | 77625000 | 2644  | nofs | nofs |
| chr03 | E | 3p12 | 5 | 77875000 | 2008  | nofs | nofs |
| chr03 | E | 3p12 | 5 | 78125000 | 2442  | nofs | nofs |
| chr03 | E | 3p12 | 5 | 78375000 | 3911  | nofs | nofs |
| chr03 | E | 3p12 | 5 | 78625000 | 3641  | nofs | nofs |
| chr03 | E | 3p12 | 5 | 78875000 | 3259  | nofs | nofs |
| chr03 | E | 3p12 | 5 | 79125000 | 2696  | nofs | nofs |
| chr03 | E | 3p12 | 5 | 79375000 | 1416  | nofs | nofs |
| chr03 | E | 3p12 | 5 | 79625000 | 3362  | nofs | nofs |
| chr03 | E | 3p12 | 5 | 79875000 | 2989  | nofs | nofs |
| chr03 | E | 3p12 | 5 | 80125000 | 4383  | nofs | nofs |
| chr03 | E | 3p12 | 5 | 80375000 | 2672  | nofs | nofs |
| chr03 | E | 3p12 | 5 | 80625000 | 2821  | nofs | nofs |
| chr03 | E | 3p12 | 5 | 80875000 | 3161  | nofs | nofs |
| chr03 | E | 3p12 | 5 | 81125000 | 21051 | nofs | nofs |
| chr03 | E | 3p12 | 5 | 81375000 | 3896  | nofs | nofs |
| chr03 | E | 3p12 | 5 | 81625000 | 2098  | nofs | nofs |
| chr03 | E | 3p12 | 5 | 81875000 | 2888  | nofs | nofs |
| chr03 | E | 3p12 | 5 | 82125000 | 1848  | nofs | nofs |
| chr03 | E | 3p12 | 5 | 82375000 | 2166  | nofs | nofs |
| chr03 | E | 3p12 | 5 | 82625000 | 4660  | nofs | nofs |
| chr03 | E | 3p12 | 5 | 82875000 | 2683  | nofs | nofs |
| chr03 | E | 3p12 | 5 | 83125000 | 5269  | nofs | nofs |
| chr03 | E | 3p12 | 5 | 83375000 | 2214  | nofs | nofs |
| chr03 | E | 3p12 | 5 | 83625000 | 2679  | nofs | nofs |
| chr03 | E | 3p12 | 5 | 83875000 | 3407  | nofs | nofs |
| chr03 | E | 3p12 | 5 | 84125000 | 2695  | nofs | nofs |
| chr03 | E | 3p12 | 5 | 84375000 | 3186  | nofs | nofs |
| chr03 | E | 3p12 | 5 | 84625000 | 3121  | nofs | nofs |
| chr03 | E | 3p12 | 5 | 84875000 | 2417  | nofs | nofs |
| chr03 | E | 3p12 | 5 | 85125000 | 3498  | nofs | nofs |
| chr03 | E | 3p12 | 5 | 85375000 | 2749  | nofs | nofs |
| chr03 | E | 3p12 | 5 | 85625000 | 3002  | nofs | nofs |
| chr03 | E | 3p12 | 5 | 85875000 | 4090  | nofs | nofs |
| chr03 | E | 3p12 | 5 | 86125000 | 2700  | nofs | nofs |



|       |   |        |   |          |       |      |      |
|-------|---|--------|---|----------|-------|------|------|
| chr03 | E | 3p12   | 5 | 86375000 | 3451  | nofs | nofs |
| chr03 | E | 3p12   | 5 | 86625000 | 3086  | nofs | nofs |
| chr03 | E | 3p12   | 5 | 86875000 | 5117  | nofs | nofs |
| chr03 | E | 3p12   | 5 | 87125000 | 2173  | nofs | nofs |
| chr03 | E | 3p12   | 5 | 87375000 | 1671  | nofs | nofs |
| chr03 | C | 3p11   | . | 87625000 | 2011  | nofs | nofs |
| chr03 | C | 3p11   | . | 87875000 | 2531  | nofs | nofs |
| chr03 | C | 3p11   | . | 88125000 | 2949  | nofs | nofs |
| chr03 | C | 3p11   | . | 88375000 | 2395  | nofs | nofs |
| chr03 | C | 3p11   | . | 88625000 | 2724  | nofs | nofs |
| chr03 | C | 3p11   | . | 88875000 | 2415  | nofs | nofs |
| chr03 | C | 3p11   | . | 89125000 | 2645  | nofs | nofs |
| chr03 | C | 3p11   | . | 89375000 | 2623  | nofs | nofs |
| chr03 | C | 3p11   | . | 89625000 | 4053  | nofs | nofs |
| chr03 | C | 3p11   | . | 89875000 | 2776  | nofs | nofs |
| chr03 | C | 3p11   | . | 90125000 | 2421  | nofs | nofs |
| chr03 | C | 3p11   | . | 90375000 | 84389 | nofs | nofs |
| chr03 | C | 3p11   | . | 90625000 | 67775 | nofs | nofs |
| chr03 | C |        | . | 90875000 | 0     | nofs | nofs |
| chr03 | C |        | . | 91125000 | 0     | nofs | nofs |
| chr03 | C |        | . | 91375000 | 0     | nofs | nofs |
| chr03 | C |        | . | 91625000 | 0     | nofs | nofs |
| chr03 | C |        | . | 91875000 | 0     | nofs | nofs |
| chr03 | C |        | . | 92125000 | 0     | nofs | nofs |
| chr03 | C |        | . | 92375000 | 0     | nofs | nofs |
| chr03 | C |        | . | 92625000 | 0     | nofs | nofs |
| chr03 | C |        | . | 92875000 | 0     | nofs | nofs |
| chr03 | C |        | . | 93125000 | 0     | nofs | nofs |
| chr03 | C |        | . | 93375000 | 0     | nofs | nofs |
| chr03 | C |        | . | 93625000 | 0     | nofs | nofs |
| chr03 | C |        | . | 93875000 | 0     | nofs | nofs |
| chr03 | C |        | . | 94125000 | 0     | nofs | nofs |
| chr03 | C |        | . | 94375000 | 0     | nofs | nofs |
| chr03 | C |        | . | 94625000 | 0     | nofs | nofs |
| chr03 | C | 3q11.1 | . | 94875000 | 10086 | nofs | nofs |
| chr03 | C | 3q11.1 | . | 95125000 | 4803  | nofs | nofs |

|       |   |        |   |          |      |      |      |
|-------|---|--------|---|----------|------|------|------|
| chr03 | C | 3q11.1 | . | 95375000 | 1305 | nofs | nofs |
| chr03 | C | 3q11.1 | . | 95625000 | 1695 | nofs | nofs |
| chr03 | C | 3q11.1 | . | 95875000 | 2366 | nofs | nofs |
| chr03 | C | 3q11.1 | . | 96125000 | 2840 | nofs | nofs |
| chr03 | C | 3q11.2 | 1 | 96375000 | 1528 | nofs | nofs |
| chr03 | C | 3q11.2 | 1 | 96625000 | 3066 | nofs | nofs |
| chr03 | C | 3q11.2 | 1 | 96875000 | 3769 | nofs | nofs |
| chr03 | C | 3q11.2 | 1 | 97125000 | 2906 | nofs | nofs |
| chr03 | C | 3q11.2 | 1 | 97375000 | 3004 | nofs | nofs |
| chr03 | C | 3q11.2 | 1 | 97625000 | 2579 | nofs | nofs |
| chr03 | C | 3q11.2 | 1 | 97875000 | 4313 | nofs | nofs |
| chr03 | E | 3q11.2 | 1 | 98125000 | 1426 | nofs | nofs |
| chr03 | E | 3q11.2 | 1 | 98375000 | 2905 | nofs | nofs |
| chr03 | E | 3q11.2 | 1 | 98625000 | 1784 | nofs | nofs |
| chr03 | E | 3q11.2 | 1 | 98875000 | 1301 | nofs | nofs |
| chr03 | E | 3q11.2 | 1 | 99125000 | 3139 | nofs | nofs |
| chr03 | E | 3q12   | 1 | 99375000 | 2464 | nofs | nofs |
| chr03 | E | 3q12   | 1 | 99625000 | 1607 | nofs | nofs |
| chr03 | E | 3q12   | 1 | 99875000 | 4780 | nofs | nofs |
| chr03 | E | 3q12   | 1 | 10000000 | 3999 | nofs | nofs |
| chr03 | E | 3q12   | 1 | 10000000 | 2314 | nofs | nofs |
| chr03 | E | 3q12   | 1 | 10100000 | 1267 | nofs | nofs |
| chr03 | E | 3q12   | 1 | 10100000 | 1554 | nofs | nofs |
| chr03 | E | 3q12   | 1 | 10100000 | 1788 | nofs | nofs |
| chr03 | E | 3q12   | 1 | 10100000 | 1841 | nofs | nofs |
| chr03 | E | 3q12   | 1 | 10200000 | 3582 | nofs | nofs |
| chr03 | E | 3q12   | 1 | 10200000 | 1744 | nofs | nofs |
| chr03 | E | 3q12   | 1 | 10200000 | 1461 | nofs | nofs |
| chr03 | E | 3q12   | 1 | 10200000 | 1517 | nofs | nofs |
| chr03 | E | 3q12   | 1 | 10300000 | 3443 | nofs | nofs |
| chr03 | E | 3q12   | 1 | 10300000 | 4367 | nofs | nofs |
| chr03 | E | 3q12   | 1 | 10300000 | 2980 | nofs | nofs |
| chr03 | E | 3q12   | 1 | 10300000 | 1091 | nofs | nofs |
| chr03 | E | 3q12   | 1 | 10400000 | 2304 | nofs | nofs |
| chr03 | E | 3q12   | 1 | 10400000 | 1509 | nofs | nofs |
| chr03 | E | 3q12   | 1 | 10400000 | 2743 | nofs | nofs |

|       |   |        |   |           |      |      |      |
|-------|---|--------|---|-----------|------|------|------|
| chr03 | E | 3q12   | 1 | 104000000 | 3226 | nofs | nofs |
| chr03 | B | 3q13.1 | . | 105000000 | 3024 | nofs | nofs |
| chr03 | B | 3q13.1 | . | 105000000 | 3056 | nofs | nofs |
| chr03 | B | 3q13.1 | . | 105000000 | 2613 | nofs | nofs |
| chr03 | B | 3q13.1 | . | 105000000 | 1617 | nofs | nofs |
| chr03 | B | 3q13.1 | . | 106000000 | 1836 | nofs | nofs |
| chr03 | B | 3q13.1 | . | 106000000 | 1855 | nofs | nofs |
| chr03 | B | 3q13.1 | . | 106000000 | 2283 | nofs | nofs |
| chr03 | B | 3q13.1 | . | 106000000 | 2213 | nofs | nofs |
| chr03 | B | 3q13.1 | . | 107000000 | 1802 | nofs | nofs |
| chr03 | B | 3q13.1 | . | 107000000 | 2466 | nofs | nofs |
| chr03 | B | 3q13.1 | . | 107000000 | 1688 | nofs | nofs |
| chr03 | B | 3q13.1 | . | 107000000 | 6172 | nofs | nofs |
| chr03 | B | 3q13.1 | . | 108000000 | 4357 | nofs | nofs |
| chr03 | B | 3q13.1 | . | 108000000 | 2296 | nofs | nofs |
| chr03 | B | 3q13.1 | . | 108000000 | 2416 | nofs | nofs |
| chr03 | B | 3q13.1 | . | 108000000 | 1537 | nofs | nofs |
| chr03 | B | 3q13.1 | . | 109000000 | 1582 | nofs | nofs |
| chr03 | B | 3q13.1 | . | 109000000 | 1732 | nofs | nofs |
| chr03 | B | 3q13.1 | . | 109000000 | 1931 | nofs | nofs |
| chr03 | B | 3q13.1 | . | 109000000 | 1795 | nofs | nofs |
| chr03 | B | 3q13.1 | . | 110000000 | 1384 | nofs | nofs |
| chr03 | B | 3q13.1 | . | 110000000 | 2970 | nofs | nofs |
| chr03 | B | 3q13.1 | . | 110000000 | 2387 | nofs | nofs |
| chr03 | B | 3q13.1 | . | 110000000 | 2949 | nofs | nofs |
| chr03 | B | 3q13.1 | . | 111000000 | 2991 | nofs | nofs |
| chr03 | B | 3q13.1 | . | 111000000 | 1646 | nofs | nofs |
| chr03 | B | 3q13.1 | . | 111000000 | 2599 | nofs | nofs |
| chr03 | B | 3q13.1 | . | 111000000 | 2639 | nofs | nofs |
| chr03 | B | 3q13.1 | . | 112000000 | 1340 | nofs | nofs |
| chr03 | B | 3q13.1 | . | 112000000 | 1604 | nofs | nofs |
| chr03 | B | 3q13.1 | . | 112000000 | 3339 | nofs | nofs |
| chr03 | B | 3q13.1 | . | 112000000 | 1915 | nofs | nofs |
| chr03 | B | 3q13.1 | . | 113000000 | 1485 | nofs | nofs |
| chr03 | B | 3q13.1 | . | 113000000 | 1738 | nofs | nofs |
| chr03 | E | 3q13.2 | 1 | 113000000 | 3484 | nofs | nofs |

|       |   |        |   |           |      |      |      |
|-------|---|--------|---|-----------|------|------|------|
| chr03 | E | 3q13.2 | 1 | 113000000 | 2184 | nofs | nofs |
| chr03 | E | 3q13.2 | 1 | 114000000 | 5288 | nofs | nofs |
| chr03 | E | 3q13.2 | 1 | 114000000 | 1790 | nofs | nofs |
| chr03 | E | 3q13.2 | 1 | 114000000 | 2062 | nofs | nofs |
| chr03 | E | 3q13.2 | 1 | 114000000 | 2921 | nofs | nofs |
| chr03 | E | 3q13.2 | 1 | 115000000 | 3391 | nofs | nofs |
| chr03 | E | 3q13.2 | 1 | 115000000 | 4074 | nofs | nofs |
| chr03 | E | 3q13.2 | 1 | 115000000 | 2113 | nofs | nofs |
| chr03 | E | 3q13.3 | 1 | 115000000 | 3335 | nofs | nofs |
| chr03 | E | 3q13.3 | 1 | 116000000 | 1854 | nofs | nofs |
| chr03 | E | 3q13.3 | 1 | 116000000 | 2505 | nofs | nofs |
| chr03 | E | 3q13.3 | 1 | 116000000 | 2624 | nofs | nofs |
| chr03 | E | 3q13.3 | 1 | 116000000 | 1958 | nofs | nofs |
| chr03 | E | 3q13.3 | 1 | 117000000 | 2506 | nofs | nofs |
| chr03 | E | 3q13.3 | 1 | 117000000 | 2230 | nofs | nofs |
| chr03 | E | 3q13.3 | 1 | 117000000 | 2151 | nofs | nofs |
| chr03 | E | 3q13.3 | 1 | 117000000 | 2282 | nofs | nofs |
| chr03 | E | 3q13.3 | 1 | 118000000 | 2634 | nofs | nofs |
| chr03 | E | 3q13.3 | 1 | 118000000 | 2126 | nofs | nofs |
| chr03 | E | 3q13.3 | 1 | 118000000 | 1694 | nofs | nofs |
| chr03 | E | 3q13.3 | 1 | 118000000 | 3206 | nofs | nofs |
| chr03 | E | 3q13.3 | 1 | 119000000 | 2082 | nofs | nofs |
| chr03 | E | 3q13.3 | 1 | 119000000 | 2396 | nofs | nofs |
| chr03 | E | 3q13.3 | 1 | 119000000 | 2935 | nofs | nofs |
| chr03 | E | 3q13.3 | 1 | 119000000 | 2206 | nofs | nofs |
| chr03 | E | 3q13.3 | 1 | 120000000 | 1453 | nofs | nofs |
| chr03 | E | 3q13.3 | 1 | 120000000 | 2623 | nofs | nofs |
| chr03 | E | 3q13.3 | 1 | 120000000 | 1757 | nofs | nofs |
| chr03 | E | 3q13.3 | 1 | 120000000 | 3187 | nofs | nofs |
| chr03 | E | 3q13.3 | 1 | 121000000 | 2046 | nofs | nofs |
| chr03 | E | 3q13.3 | 1 | 121000000 | 2431 | nofs | nofs |
| chr03 | E | 3q13.3 | 1 | 121000000 | 2938 | nofs | nofs |
| chr03 | E | 3q13.3 | 1 | 121000000 | 2349 | nofs | nofs |
| chr03 | E | 3q13.3 | 1 | 122000000 | 2052 | nofs | nofs |
| chr03 | E | 3q13.3 | 1 | 122000000 | 2641 | nofs | nofs |
| chr03 | E | 3q13.3 | 1 | 122000000 | 1617 | nofs | nofs |

|       |   |        |   |           |       |      |      |
|-------|---|--------|---|-----------|-------|------|------|
| chr03 | E | 3q13.3 | 1 | 122000000 | 3713  | nofs | nofs |
| chr03 | E | 3q13.3 | 1 | 123000000 | 3488  | nofs | nofs |
| chr03 | E | 3q13.3 | 1 | 123000000 | 5758  | nofs | nofs |
| chr03 | E | 3q13.3 | 1 | 123000000 | 1645  | nofs | nofs |
| chr03 | E | 3q13.3 | 1 | 123000000 | 3566  | nofs | nofs |
| chr03 | E | 3q21   | 5 | 124000000 | 2984  | nofs | nofs |
| chr03 | E | 3q21   | 5 | 124000000 | 4185  | nofs | nofs |
| chr03 | E | 3q21   | 5 | 124000000 | 2271  | nofs | nofs |
| chr03 | E | 3q21   | 5 | 124000000 | 2328  | nofs | nofs |
| chr03 | E | 3q21   | 5 | 125000000 | 3022  | nofs | nofs |
| chr03 | E | 3q21   | 5 | 125000000 | 3137  | nofs | nofs |
| chr03 | E | 3q21   | 5 | 125000000 | 2114  | nofs | nofs |
| chr03 | E | 3q21   | 5 | 125000000 | 2787  | nofs | nofs |
| chr03 | E | 3q21   | 5 | 126000000 | 4499  | nofs | nofs |
| chr03 | E | 3q21   | 5 | 126000000 | 5445  | nofs | nofs |
| chr03 | E | 3q21   | 5 | 126000000 | 3693  | nofs | nofs |
| chr03 | E | 3q21   | 5 | 126000000 | 1433  | nofs | nofs |
| chr03 | E | 3q21   | 5 | 127000000 | 1984  | nofs | nofs |
| chr03 | E | 3q21   | 5 | 127000000 | 17036 | nofs | nofs |
| chr03 | E | 3q21   | 5 | 127000000 | 2734  | nofs | nofs |
| chr03 | E | 3q21   | 5 | 127000000 | 3779  | nofs | nofs |
| chr03 | E | 3q21   | 5 | 128000000 | 6123  | nofs | nofs |
| chr03 | E | 3q21   | 5 | 128000000 | 2443  | nofs | nofs |
| chr03 | E | 3q21   | 5 | 128000000 | 5804  | nofs | nofs |
| chr03 | E | 3q21   | 5 | 128000000 | 7453  | nofs | nofs |
| chr03 | E | 3q21   | 5 | 129000000 | 5321  | nofs | nofs |
| chr03 | E | 3q21   | 5 | 129000000 | 5810  | nofs | nofs |
| chr03 | E | 3q21   | 5 | 129000000 | 2597  | nofs | nofs |
| chr03 | E | 3q21   | 5 | 129000000 | 2429  | nofs | nofs |
| chr03 | E | 3q21   | 5 | 130000000 | 4810  | nofs | nofs |
| chr03 | E | 3q21   | 5 | 130000000 | 5148  | nofs | nofs |
| chr03 | E | 3q21   | 5 | 130000000 | 4430  | nofs | nofs |
| chr03 | E | 3q21   | 5 | 130000000 | 4267  | nofs | nofs |
| chr03 | E | 3q21   | 5 | 131000000 | 8692  | nofs | nofs |
| chr03 | E | 3q21   | 5 | 131000000 | 2387  | nofs | nofs |
| chr03 | E | 3q21   | 5 | 131000000 | 5765  | nofs | nofs |

|       |   |      |   |           |      |      |      |
|-------|---|------|---|-----------|------|------|------|
| chr03 | E | 3q21 | 5 | 131000000 | 3178 | nofs | nofs |
| chr03 | E | 3q21 | 5 | 132000000 | 2444 | nofs | nofs |
| chr03 | E | 3q21 | 5 | 132000000 | 2244 | nofs | nofs |
| chr03 | E | 3q21 | 5 | 132000000 | 3230 | nofs | nofs |
| chr03 | E | 3q21 | 5 | 132000000 | 2105 | nofs | nofs |
| chr03 | E | 3q21 | 5 | 133000000 | 2456 | nofs | nofs |
| chr03 | E | 3q22 | 3 | 133000000 | 1822 | nofs | nofs |
| chr03 | E | 3q22 | 3 | 133000000 | 3875 | nofs | nofs |
| chr03 | E | 3q22 | 3 | 133000000 | 3075 | nofs | nofs |
| chr03 | E | 3q22 | 3 | 134000000 | 3692 | nofs | nofs |
| chr03 | E | 3q22 | 3 | 134000000 | 1788 | nofs | nofs |
| chr03 | E | 3q22 | 3 | 134000000 | 2758 | nofs | nofs |
| chr03 | E | 3q22 | 3 | 134000000 | 1604 | nofs | nofs |
| chr03 | E | 3q22 | 3 | 135000000 | 6714 | nofs | nofs |
| chr03 | E | 3q22 | 3 | 135000000 | 1973 | nofs | nofs |
| chr03 | E | 3q22 | 3 | 135000000 | 2898 | nofs | nofs |
| chr03 | E | 3q22 | 3 | 135000000 | 3197 | nofs | nofs |
| chr03 | E | 3q22 | 3 | 136000000 | 2910 | nofs | nofs |
| chr03 | E | 3q22 | 3 | 136000000 | 2959 | nofs | nofs |
| chr03 | E | 3q22 | 3 | 136000000 | 2774 | nofs | nofs |
| chr03 | E | 3q22 | 3 | 136000000 | 1859 | nofs | nofs |
| chr03 | E | 3q22 | 3 | 137000000 | 1173 | nofs | nofs |
| chr03 | E | 3q22 | 3 | 137000000 | 1407 | nofs | nofs |
| chr03 | E | 3q22 | 3 | 137000000 | 2520 | nofs | nofs |
| chr03 | E | 3q22 | 3 | 137000000 | 2257 | nofs | nofs |
| chr03 | E | 3q22 | 3 | 138000000 | 2772 | nofs | nofs |
| chr03 | E | 3q22 | 3 | 138000000 | 5348 | nofs | nofs |
| chr03 | E | 3q22 | 3 | 138000000 | 2552 | nofs | nofs |
| chr03 | E | 3q22 | 3 | 138000000 | 2941 | nofs | nofs |
| chr03 | E | 3q22 | 3 | 139000000 | 1458 | nofs | nofs |
| chr03 | E | 3q22 | 3 | 139000000 | 2332 | nofs | nofs |
| chr03 | E | 3q22 | 3 | 139000000 | 2523 | nofs | nofs |
| chr03 | E | 3q22 | 3 | 139000000 | 3164 | nofs | nofs |
| chr03 | E | 3q22 | 3 | 140000000 | 2768 | nofs | nofs |
| chr03 | E | 3q22 | 3 | 140000000 | 5702 | nofs | nofs |
| chr03 | E | 3q22 | 3 | 140000000 | 4637 | nofs | nofs |

|       |   |      |   |           |      |      |      |
|-------|---|------|---|-----------|------|------|------|
| chr03 | E | 3q22 | 3 | 140000000 | 3748 | nofs | nofs |
| chr03 | E | 3q23 | 1 | 141000000 | 1420 | nofs | nofs |
| chr03 | E | 3q23 | 1 | 141000000 | 2111 | nofs | nofs |
| chr03 | E | 3q23 | 1 | 141000000 | 1556 | nofs | nofs |
| chr03 | E | 3q23 | 1 | 141000000 | 2281 | nofs | nofs |
| chr03 | E | 3q23 | 1 | 142000000 | 2038 | nofs | nofs |
| chr03 | E | 3q23 | 1 | 142000000 | 2927 | nofs | nofs |
| chr03 | E | 3q23 | 1 | 142000000 | 3428 | nofs | nofs |
| chr03 | E | 3q23 | 1 | 142000000 | 2447 | nofs | nofs |
| chr03 | E | 3q23 | 1 | 143000000 | 2067 | nofs | nofs |
| chr03 | E | 3q23 | 1 | 143000000 | 3064 | nofs | nofs |
| chr03 | E | 3q23 | 1 | 143000000 | 7581 | nofs | nofs |
| chr03 | E | 3q23 | 1 | 143000000 | 3555 | nofs | nofs |
| chr03 | E | 3q23 | 1 | 144000000 | 3013 | nofs | nofs |
| chr03 | E | 3q23 | 1 | 144000000 | 2525 | nofs | nofs |
| chr03 | E | 3q23 | 1 | 144000000 | 3031 | nofs | nofs |
| chr03 | E | 3q23 | 1 | 144000000 | 2186 | nofs | nofs |
| chr03 | E | 3q24 | 3 | 145000000 | 2986 | nofs | nofs |
| chr03 | E | 3q24 | 3 | 145000000 | 1325 | nofs | nofs |
| chr03 | E | 3q24 | 3 | 145000000 | 2246 | nofs | nofs |
| chr03 | E | 3q24 | 3 | 145000000 | 2815 | nofs | nofs |
| chr03 | E | 3q24 | 3 | 146000000 | 2630 | nofs | nofs |
| chr03 | E | 3q24 | 3 | 146000000 | 2834 | nofs | nofs |
| chr03 | E | 3q24 | 3 | 146000000 | 3824 | nofs | nofs |
| chr03 | E | 3q24 | 3 | 146000000 | 2381 | nofs | nofs |
| chr03 | E | 3q24 | 3 | 147000000 | 1731 | nofs | nofs |
| chr03 | E | 3q24 | 3 | 147000000 | 3563 | nofs | nofs |
| chr03 | E | 3q24 | 3 | 147000000 | 1887 | nofs | nofs |
| chr03 | E | 3q24 | 3 | 147000000 | 2935 | nofs | nofs |
| chr03 | E | 3q24 | 3 | 148000000 | 1625 | nofs | nofs |
| chr03 | E | 3q24 | 3 | 148000000 | 3044 | nofs | nofs |
| chr03 | E | 3q24 | 3 | 148000000 | 1852 | nofs | nofs |
| chr03 | E | 3q24 | 3 | 148000000 | 3263 | nofs | nofs |
| chr03 | E | 3q24 | 3 | 149000000 | 1972 | nofs | nofs |
| chr03 | E | 3q24 | 3 | 149000000 | 1945 | nofs | nofs |
| chr03 | E | 3q24 | 3 | 149000000 | 2646 | nofs | nofs |

|       |   |        |   |           |      |      |           |
|-------|---|--------|---|-----------|------|------|-----------|
| chr03 | E | 3q24   | 3 | 149000000 | 2784 | nofs | nofs      |
| chr03 | E | 3q24   | 3 | 150000000 | 3046 | nofs | nofs      |
| chr03 | E | 3q24   | 3 | 150000000 | 2850 | nofs | nofs      |
| chr03 | E | 3q24   | 3 | 150000000 | 1620 | nofs | nofs      |
| chr03 | E | 3q24   | 3 | 150000000 | 2329 | nofs | nofs      |
| chr03 | B | 3q25.1 | . | 151000000 | 3947 | fs   | fs common |
| chr03 | B | 3q25.1 | . | 151000000 | 2555 | fs   | fs common |
| chr03 | B | 3q25.1 | . | 151000000 | 2385 | fs   | fs common |
| chr03 | B | 3q25.1 | . | 151000000 | 1914 | fs   | fs common |
| chr03 | B | 3q25.1 | . | 152000000 | 1746 | fs   | fs common |
| chr03 | B | 3q25.1 | . | 152000000 | 2178 | fs   | fs common |
| chr03 | B | 3q25.1 | . | 152000000 | 4722 | fs   | fs common |
| chr03 | B | 3q25.1 | . | 152000000 | 1921 | fs   | fs common |
| chr03 | B | 3q25.1 | . | 153000000 | 1590 | fs   | fs common |
| chr03 | B | 3q25.1 | . | 153000000 | 3138 | fs   | fs common |
| chr03 | B | 3q25.1 | . | 153000000 | 3696 | fs   | fs common |
| chr03 | B | 3q25.1 | . | 153000000 | 3063 | fs   | fs common |
| chr03 | B | 3q25.1 | . | 154000000 | 2292 | fs   | fs common |
| chr03 | B | 3q25.2 | . | 154000000 | 3610 | fs   | fs common |
| chr03 | B | 3q25.2 | . | 154000000 | 3095 | fs   | fs common |
| chr03 | B | 3q25.2 | . | 154000000 | 3449 | fs   | fs common |
| chr03 | B | 3q25.2 | . | 155000000 | 3437 | fs   | fs common |
| chr03 | B | 3q25.2 | . | 155000000 | 2458 | fs   | fs common |
| chr03 | B | 3q25.2 | . | 155000000 | 3182 | fs   | fs common |
| chr03 | B | 3q25.2 | . | 155000000 | 1694 | fs   | fs common |
| chr03 | B | 3q25.2 | . | 156000000 | 2239 | fs   | fs common |
| chr03 | B | 3q25.2 | . | 156000000 | 2378 | fs   | fs common |
| chr03 | B | 3q25.2 | . | 156000000 | 1971 | fs   | fs common |
| chr03 | B | 3q25.2 | . | 156000000 | 2590 | fs   | fs common |
| chr03 | E | 3q25.3 | 1 | 157000000 | 2558 | fs   | fs common |
| chr03 | E | 3q25.3 | 1 | 157000000 | 5140 | fs   | fs common |
| chr03 | E | 3q25.3 | 1 | 157000000 | 4600 | fs   | fs common |
| chr03 | E | 3q25.3 | 1 | 157000000 | 2842 | fs   | fs common |
| chr03 | E | 3q25.3 | 1 | 158000000 | 1588 | fs   | fs common |
| chr03 | E | 3q25.3 | 1 | 158000000 | 2201 | fs   | fs common |
| chr03 | E | 3q25.3 | 1 | 158000000 | 2337 | fs   | fs common |



|       |   |        |   |           |      |      |           |
|-------|---|--------|---|-----------|------|------|-----------|
| chr03 | E | 3q25.3 | 1 | 158000000 | 4205 | fs   | fs common |
| chr03 | E | 3q25.3 | 1 | 159000000 | 2240 | fs   | fs common |
| chr03 | E | 3q25.3 | 1 | 159000000 | 1617 | fs   | fs common |
| chr03 | E | 3q25.3 | 1 | 159000000 | 1694 | fs   | fs common |
| chr03 | E | 3q25.3 | 1 | 159000000 | 2207 | fs   | fs common |
| chr03 | E | 3q25.3 | 1 | 160000000 | 2216 | fs   | fs common |
| chr03 | E | 3q25.3 | 1 | 160000000 | 3267 | fs   | fs common |
| chr03 | E | 3q25.3 | 1 | 160000000 | 1382 | fs   | fs common |
| chr03 | E | 3q25.3 | 1 | 160000000 | 1581 | fs   | fs common |
| chr03 | E | 3q25.3 | 1 | 161000000 | 1274 | fs   | fs common |
| chr03 | E | 3q25.3 | 1 | 161000000 | 2653 | fs   | fs common |
| chr03 | E | 3q25.3 | 1 | 161000000 | 2822 | fs   | fs common |
| chr03 | E | 3q25.3 | 1 | 161000000 | 3557 | fs   | fs common |
| chr03 | E | 3q25.3 | 1 | 162000000 | 1847 | fs   | fs common |
| chr03 | E | 3q25.3 | 1 | 162000000 | 2044 | fs   | fs common |
| chr03 | E | 3q25.3 | 1 | 162000000 | 3500 | fs   | fs common |
| chr03 | E | 3q26.1 | 2 | 162000000 | 1565 | nofs | nofs      |
| chr03 | E | 3q26.1 | 2 | 163000000 | 8393 | nofs | nofs      |
| chr03 | E | 3q26.1 | 2 | 163000000 | 3109 | nofs | nofs      |
| chr03 | E | 3q26.1 | 2 | 163000000 | 2540 | nofs | nofs      |
| chr03 | E | 3q26.1 | 2 | 163000000 | 2950 | nofs | nofs      |
| chr03 | E | 3q26.1 | 2 | 164000000 | 3481 | nofs | nofs      |
| chr03 | E | 3q26.1 | 2 | 164000000 | 4494 | nofs | nofs      |
| chr03 | E | 3q26.1 | 2 | 164000000 | 2189 | nofs | nofs      |
| chr03 | E | 3q26.1 | 2 | 164000000 | 2609 | nofs | nofs      |
| chr03 | E | 3q26.1 | 2 | 165000000 | 3486 | nofs | nofs      |
| chr03 | E | 3q26.1 | 2 | 165000000 | 2574 | nofs | nofs      |
| chr03 | E | 3q26.1 | 2 | 165000000 | 2434 | nofs | nofs      |
| chr03 | E | 3q26.1 | 2 | 165000000 | 1561 | nofs | nofs      |
| chr03 | E | 3q26.1 | 2 | 166000000 | 3197 | nofs | nofs      |
| chr03 | E | 3q26.1 | 2 | 166000000 | 2578 | nofs | nofs      |
| chr03 | E | 3q26.1 | 2 | 166000000 | 2880 | nofs | nofs      |
| chr03 | E | 3q26.1 | 2 | 166000000 | 3288 | nofs | nofs      |
| chr03 | E | 3q26.1 | 2 | 167000000 | 2781 | nofs | nofs      |
| chr03 | E | 3q26.1 | 2 | 167000000 | 2458 | nofs | nofs      |
| chr03 | E | 3q26.1 | 2 | 167000000 | 1713 | nofs | nofs      |

|       |   |        |   |           |      |      |      |
|-------|---|--------|---|-----------|------|------|------|
| chr03 | E | 3q26.1 | 2 | 167000000 | 2676 | nofs | nofs |
| chr03 | E | 3q26.1 | 2 | 168000000 | 2454 | nofs | nofs |
| chr03 | E | 3q26.1 | 2 | 168000000 | 2311 | nofs | nofs |
| chr03 | E | 3q26.1 | 2 | 168000000 | 3824 | nofs | nofs |
| chr03 | E | 3q26.1 | 2 | 168000000 | 1785 | nofs | nofs |
| chr03 | E | 3q26.1 | 2 | 169000000 | 2344 | nofs | nofs |
| chr03 | E | 3q26.1 | 2 | 169000000 | 2679 | nofs | nofs |
| chr03 | E | 3q26.1 | 2 | 169000000 | 2749 | nofs | nofs |
| chr03 | E | 3q26.1 | 2 | 169000000 | 7434 | nofs | nofs |
| chr03 | E | 3q26.2 | 2 | 170000000 | 1434 | nofs | nofs |
| chr03 | E | 3q26.2 | 2 | 170000000 | 2014 | nofs | nofs |
| chr03 | E | 3q26.2 | 2 | 170000000 | 4539 | nofs | nofs |
| chr03 | E | 3q26.2 | 2 | 170000000 | 1943 | nofs | nofs |
| chr03 | E | 3q26.2 | 2 | 171000000 | 2569 | nofs | nofs |
| chr03 | E | 3q26.2 | 2 | 171000000 | 2759 | nofs | nofs |
| chr03 | E | 3q26.2 | 2 | 171000000 | 1947 | nofs | nofs |
| chr03 | E | 3q26.2 | 2 | 171000000 | 2528 | nofs | nofs |
| chr03 | E | 3q26.2 | 2 | 172000000 | 2907 | nofs | nofs |
| chr03 | E | 3q26.2 | 2 | 172000000 | 2231 | nofs | nofs |
| chr03 | E | 3q26.2 | 2 | 172000000 | 3114 | nofs | nofs |
| chr03 | E | 3q26.2 | 2 | 172000000 | 1174 | nofs | nofs |
| chr03 | E | 3q26.2 | 2 | 173000000 | 2730 | nofs | nofs |
| chr03 | E | 3q26.2 | 2 | 173000000 | 4619 | nofs | nofs |
| chr03 | E | 3q26.3 | 3 | 173000000 | 3847 | nofs | nofs |
| chr03 | E | 3q26.3 | 3 | 173000000 | 2347 | nofs | nofs |
| chr03 | E | 3q26.3 | 3 | 174000000 | 2488 | nofs | nofs |
| chr03 | E | 3q26.3 | 3 | 174000000 | 2562 | nofs | nofs |
| chr03 | E | 3q26.3 | 3 | 174000000 | 2078 | nofs | nofs |
| chr03 | E | 3q26.3 | 3 | 174000000 | 1926 | nofs | nofs |
| chr03 | E | 3q26.3 | 3 | 175000000 | 2517 | nofs | nofs |
| chr03 | E | 3q26.3 | 3 | 175000000 | 2271 | nofs | nofs |
| chr03 | E | 3q26.3 | 3 | 175000000 | 3406 | nofs | nofs |
| chr03 | E | 3q26.3 | 3 | 175000000 | 3433 | nofs | nofs |
| chr03 | E | 3q26.3 | 3 | 176000000 | 3884 | nofs | nofs |
| chr03 | E | 3q26.3 | 3 | 176000000 | 1641 | nofs | nofs |
| chr03 | E | 3q26.3 | 3 | 176000000 | 3774 | nofs | nofs |

|       |   |        |   |           |      |      |           |
|-------|---|--------|---|-----------|------|------|-----------|
| chr03 | E | 3q26.3 | 3 | 176000000 | 3273 | nofs | nofs      |
| chr03 | E | 3q26.3 | 3 | 177000000 | 2883 | nofs | nofs      |
| chr03 | E | 3q26.3 | 3 | 177000000 | 4398 | nofs | nofs      |
| chr03 | E | 3q26.3 | 3 | 177000000 | 2918 | nofs | nofs      |
| chr03 | E | 3q26.3 | 3 | 177000000 | 4993 | nofs | nofs      |
| chr03 | E | 3q26.3 | 3 | 178000000 | 2462 | nofs | nofs      |
| chr03 | E | 3q26.3 | 3 | 178000000 | 3609 | nofs | nofs      |
| chr03 | E | 3q26.3 | 3 | 178000000 | 2465 | nofs | nofs      |
| chr03 | E | 3q26.3 | 3 | 178000000 | 4365 | nofs | nofs      |
| chr03 | E | 3q26.3 | 3 | 179000000 | 4122 | nofs | nofs      |
| chr03 | E | 3q26.3 | 3 | 179000000 | 2408 | nofs | nofs      |
| chr03 | E | 3q26.3 | 3 | 179000000 | 3267 | nofs | nofs      |
| chr03 | E | 3q26.3 | 3 | 179000000 | 3305 | nofs | nofs      |
| chr03 | E | 3q26.3 | 3 | 180000000 | 1897 | nofs | nofs      |
| chr03 | E | 3q26.3 | 3 | 180000000 | 4771 | nofs | nofs      |
| chr03 | E | 3q26.3 | 3 | 180000000 | 3572 | nofs | nofs      |
| chr03 | E | 3q26.3 | 3 | 180000000 | 4256 | nofs | nofs      |
| chr03 | E | 3q26.3 | 3 | 181000000 | 2191 | nofs | nofs      |
| chr03 | E | 3q26.3 | 3 | 181000000 | 3380 | nofs | nofs      |
| chr03 | E | 3q26.3 | 3 | 181000000 | 2313 | nofs | nofs      |
| chr03 | E | 3q26.3 | 3 | 181000000 | 2726 | nofs | nofs      |
| chr03 | E | 3q26.3 | 3 | 182000000 | 1518 | nofs | nofs      |
| chr03 | E | 3q26.3 | 3 | 182000000 | 3067 | nofs | nofs      |
| chr03 | E | 3q26.3 | 3 | 182000000 | 2398 | nofs | nofs      |
| chr03 | E | 3q26.3 | 3 | 182000000 | 5043 | nofs | nofs      |
| chr03 | E | 3q26.3 | 3 | 183000000 | 4139 | nofs | nofs      |
| chr03 | E | 3q26.3 | 3 | 183000000 | 2623 | nofs | nofs      |
| chr03 | E | 3q26.3 | 3 | 183000000 | 5132 | nofs | nofs      |
| chr03 | E | 3q26.3 | 3 | 183000000 | 2516 | nofs | nofs      |
| chr03 | E | 3q26.3 | 3 | 184000000 | 1824 | nofs | nofs      |
| chr03 | E | 3q26.3 | 3 | 184000000 | 3412 | nofs | nofs      |
| chr03 | E | 3q26.3 | 3 | 184000000 | 3808 | nofs | nofs      |
| chr03 | E | 3q27   | 3 | 184000000 | 3884 | fs   | fs common |
| chr03 | E | 3q27   | 3 | 185000000 | 2584 | fs   | fs common |
| chr03 | E | 3q27   | 3 | 185000000 | 5352 | fs   | fs common |
| chr03 | E | 3q27   | 3 | 185000000 | 4980 | fs   | fs common |

|       |   |      |   |           |      |      |           |
|-------|---|------|---|-----------|------|------|-----------|
| chr03 | E | 3q27 | 3 | 185000000 | 5763 | fs   | fs common |
| chr03 | E | 3q27 | 3 | 186000000 | 5859 | fs   | fs common |
| chr03 | E | 3q27 | 3 | 186000000 | 7409 | fs   | fs common |
| chr03 | E | 3q27 | 3 | 186000000 | 1962 | fs   | fs common |
| chr03 | E | 3q27 | 3 | 186000000 | 3719 | fs   | fs common |
| chr03 | E | 3q27 | 3 | 187000000 | 5581 | fs   | fs common |
| chr03 | E | 3q27 | 3 | 187000000 | 4036 | fs   | fs common |
| chr03 | E | 3q27 | 3 | 187000000 | 4480 | fs   | fs common |
| chr03 | E | 3q27 | 3 | 187000000 | 2776 | fs   | fs common |
| chr03 | E | 3q27 | 3 | 188000000 | 2876 | fs   | fs common |
| chr03 | E | 3q27 | 3 | 188000000 | 3456 | fs   | fs common |
| chr03 | E | 3q27 | 3 | 188000000 | 6410 | fs   | fs common |
| chr03 | E | 3q27 | 3 | 188000000 | 2315 | fs   | fs common |
| chr03 | E | 3q27 | 3 | 189000000 | 3714 | fs   | fs common |
| chr03 | E | 3q27 | 3 | 189000000 | 3751 | fs   | fs common |
| chr03 | E | 3q27 | 3 | 189000000 | 1457 | fs   | fs common |
| chr03 | E | 3q27 | 3 | 189000000 | 3737 | fs   | fs common |
| chr03 | E | 3q27 | 3 | 190000000 | 3365 | fs   | fs common |
| chr03 | B | 3q28 | . | 190000000 | 4097 | nofs | nofs      |
| chr03 | B | 3q28 | . | 190000000 | 1690 | nofs | nofs      |
| chr03 | B | 3q28 | . | 190000000 | 2807 | nofs | nofs      |
| chr03 | B | 3q28 | . | 191000000 | 3358 | nofs | nofs      |
| chr03 | B | 3q28 | . | 191000000 | 3044 | nofs | nofs      |
| chr03 | B | 3q28 | . | 191000000 | 3246 | nofs | nofs      |
| chr03 | B | 3q28 | . | 191000000 | 3622 | nofs | nofs      |
| chr03 | B | 3q28 | . | 192000000 | 2771 | nofs | nofs      |
| chr03 | B | 3q28 | . | 192000000 | 2250 | nofs | nofs      |
| chr03 | B | 3q28 | . | 192000000 | 3209 | nofs | nofs      |
| chr03 | B | 3q28 | . | 192000000 | 3710 | nofs | nofs      |
| chr03 | B | 3q28 | . | 193000000 | 1957 | nofs | nofs      |
| chr03 | B | 3q28 | . | 193000000 | 2355 | nofs | nofs      |
| chr03 | B | 3q28 | . | 193000000 | 2679 | nofs | nofs      |
| chr03 | B | 3q28 | . | 193000000 | 2464 | nofs | nofs      |
| chr03 | B | 3q28 | . | 194000000 | 1259 | nofs | nofs      |
| chr03 | B | 3q28 | . | 194000000 | 2462 | nofs | nofs      |
| chr03 | E | 3q29 | 4 | 194000000 | 4375 | nofs | nofs      |

|       |   |      |   |           |       |      |      |
|-------|---|------|---|-----------|-------|------|------|
| chr03 | E | 3q29 | 4 | 194000000 | 1845  | nofs | nofs |
| chr03 | E | 3q29 | 4 | 195000000 | 2767  | nofs | nofs |
| chr03 | E | 3q29 | 4 | 195000000 | 2837  | nofs | nofs |
| chr03 | E | 3q29 | 4 | 195000000 | 2506  | nofs | nofs |
| chr03 | E | 3q29 | 4 | 195000000 | 4433  | nofs | nofs |
| chr03 | E | 3q29 | 4 | 196000000 | 4658  | nofs | nofs |
| chr03 | E | 3q29 | 4 | 196000000 | 5952  | nofs | nofs |
| chr03 | T | 3q29 | 4 | 196000000 | 5893  | nofs | nofs |
| chr03 | T | 3q29 | 4 | 196000000 | 6911  | nofs | nofs |
| chr03 | T | 3q29 | 4 | 197000000 | 36942 | nofs | nofs |
| chr03 | T | 3q29 | 4 | 197000000 | 20737 | nofs | nofs |
| chr03 | T | 3q29 | 4 | 197000000 | 32198 | nofs | nofs |
| chr03 | T | 3q29 | 4 | 197000000 | 12721 | nofs | nofs |
| chr03 | T | 3q29 | 4 | 198000000 | 10147 | nofs | nofs |
| chr03 | T | 3q29 | 4 | 198000000 | 6134  | nofs | nofs |
| chr03 | T | 3q29 | 4 | 198000000 | 7759  | nofs | nofs |
| chr03 | T | 3q29 | 4 | 198000000 | 2821  | nofs | nofs |
| chr03 | T | 3q29 | 4 | 199000000 | 18041 | nofs | nofs |
| chr03 | T | 3q29 | 4 | 199000000 | 21931 | nofs | nofs |
| chr03 | T | 3q29 | 4 | 199000000 | 17899 | nofs | nofs |
| chr04 | T | 4p16 | 6 | 125000    | 7096  | nofs | nofs |
| chr04 | T | 4p16 | 6 | 375000    | 9702  | nofs | nofs |
| chr04 | T | 4p16 | 6 | 625000    | 32439 | nofs | nofs |
| chr04 | T | 4p16 | 6 | 875000    | 21068 | nofs | nofs |
| chr04 | T | 4p16 | 6 | 1125000   | 21385 | nofs | nofs |
| chr04 | T | 4p16 | 6 | 1375000   | 27743 | nofs | nofs |
| chr04 | T | 4p16 | 6 | 1625000   | 18083 | nofs | nofs |
| chr04 | T | 4p16 | 6 | 1875000   | 4056  | nofs | nofs |
| chr04 | T | 4p16 | 6 | 2125000   | 2886  | nofs | nofs |
| chr04 | T | 4p16 | 6 | 2375000   | 11314 | nofs | nofs |
| chr04 | T | 4p16 | 6 | 2625000   | 1378  | nofs | nofs |
| chr04 | T | 4p16 | 6 | 2875000   | 5849  | nofs | nofs |
| chr04 | T | 4p16 | 6 | 3125000   | 3588  | nofs | nofs |
| chr04 | E | 4p16 | 6 | 3375000   | 8923  | nofs | nofs |
| chr04 | E | 4p16 | 6 | 3625000   | 24231 | nofs | nofs |
| chr04 | E | 4p16 | 6 | 3875000   | 10590 | nofs | nofs |

|       |   |        |   |          |       |      |           |
|-------|---|--------|---|----------|-------|------|-----------|
| chr04 | E | 4p16   | 6 | 4125000  | 5684  | nofs | nofs      |
| chr04 | E | 4p16   | 6 | 4375000  | 3823  | nofs | nofs      |
| chr04 | E | 4p16   | 6 | 4625000  | 2380  | nofs | nofs      |
| chr04 | E | 4p16   | 6 | 4875000  | 3754  | nofs | nofs      |
| chr04 | E | 4p16   | 6 | 5125000  | 3793  | nofs | nofs      |
| chr04 | E | 4p16   | 6 | 5375000  | 4670  | nofs | nofs      |
| chr04 | E | 4p16   | 6 | 5625000  | 2369  | nofs | nofs      |
| chr04 | E | 4p16   | 6 | 5875000  | 6071  | nofs | nofs      |
| chr04 | E | 4p16   | 6 | 6125000  | 7739  | fs   | fs common |
| chr04 | E | 4p16   | 6 | 6375000  | 6569  | fs   | fs common |
| chr04 | E | 4p16   | 6 | 6625000  | 6426  | fs   | fs common |
| chr04 | E | 4p16   | 6 | 6875000  | 4603  | fs   | fs common |
| chr04 | E | 4p16   | 6 | 7125000  | 7007  | fs   | fs common |
| chr04 | E | 4p16   | 6 | 7375000  | 10220 | fs   | fs common |
| chr04 | E | 4p16   | 6 | 7625000  | 19569 | fs   | fs common |
| chr04 | E | 4p16   | 6 | 7875000  | 14115 | fs   | fs common |
| chr04 | E | 4p16   | 6 | 8125000  | 8958  | fs   | fs common |
| chr04 | E | 4p16   | 6 | 8375000  | 11027 | fs   | fs common |
| chr04 | E | 4p16   | 6 | 8625000  | 7215  | fs   | fs common |
| chr04 | E | 4p16   | 6 | 8875000  | 2927  | fs   | fs common |
| chr04 | E | 4p16   | 6 | 9125000  | 6056  | fs   | fs common |
| chr04 | E | 4p16   | 6 | 9375000  | 4535  | fs   | fs common |
| chr04 | E | 4p16   | 6 | 9625000  | 3357  | fs   | fs common |
| chr04 | E | 4p16   | 6 | 9875000  | 1708  | fs   | fs common |
| chr04 | E | 4p16   | 6 | 10125000 | 3105  | fs   | fs common |
| chr04 | E | 4p16   | 6 | 10375000 | 2396  | fs   | fs common |
| chr04 | E | 4p16   | 6 | 10625000 | 3616  | fs   | fs common |
| chr04 | E | 4p16   | 6 | 10875000 | 4195  | fs   | fs common |
| chr04 | E | 4p15.3 | 2 | 11125000 | 2098  | fs   | fs common |
| chr04 | E | 4p15.3 | 2 | 11375000 | 2477  | fs   | fs common |
| chr04 | E | 4p15.3 | 2 | 11625000 | 2750  | fs   | fs common |
| chr04 | E | 4p15.3 | 2 | 11875000 | 15645 | fs   | fs common |
| chr04 | E | 4p15.3 | 2 | 12125000 | 2888  | fs   | fs common |
| chr04 | E | 4p15.3 | 2 | 12375000 | 7040  | fs   | fs common |
| chr04 | E | 4p15.3 | 2 | 12625000 | 2883  | fs   | fs common |
| chr04 | E | 4p15.3 | 2 | 12875000 | 2591  | fs   | fs common |

|       |   |        |   |          |      |    |           |
|-------|---|--------|---|----------|------|----|-----------|
| chr04 | E | 4p15.3 | 2 | 13125000 | 1454 | fs | fs common |
| chr04 | E | 4p15.3 | 2 | 13375000 | 2927 | fs | fs common |
| chr04 | E | 4p15.3 | 2 | 13625000 | 2031 | fs | fs common |
| chr04 | E | 4p15.3 | 2 | 13875000 | 2621 | fs | fs common |
| chr04 | E | 4p15.3 | 2 | 14125000 | 2228 | fs | fs common |
| chr04 | E | 4p15.3 | 2 | 14375000 | 2940 | fs | fs common |
| chr04 | E | 4p15.3 | 2 | 14625000 | 5721 | fs | fs common |
| chr04 | E | 4p15.3 | 2 | 14875000 | 2165 | fs | fs common |
| chr04 | E | 4p15.3 | 2 | 15125000 | 1974 | fs | fs common |
| chr04 | E | 4p15.3 | 2 | 15375000 | 4825 | fs | fs common |
| chr04 | E | 4p15.3 | 2 | 15625000 | 2772 | fs | fs common |
| chr04 | E | 4p15.3 | 2 | 15875000 | 2577 | fs | fs common |
| chr04 | E | 4p15.3 | 2 | 16125000 | 3121 | fs | fs common |
| chr04 | E | 4p15.3 | 2 | 16375000 | 2495 | fs | fs common |
| chr04 | E | 4p15.3 | 2 | 16625000 | 2821 | fs | fs common |
| chr04 | E | 4p15.3 | 2 | 16875000 | 1486 | fs | fs common |
| chr04 | E | 4p15.3 | 2 | 17125000 | 4436 | fs | fs common |
| chr04 | E | 4p15.3 | 2 | 17375000 | 3033 | fs | fs common |
| chr04 | E | 4p15.3 | 2 | 17625000 | 1792 | fs | fs common |
| chr04 | E | 4p15.3 | 2 | 17875000 | 1679 | fs | fs common |
| chr04 | E | 4p15.3 | 2 | 18125000 | 3114 | fs | fs common |
| chr04 | E | 4p15.3 | 2 | 18375000 | 5105 | fs | fs common |
| chr04 | E | 4p15.3 | 2 | 18625000 | 1833 | fs | fs common |
| chr04 | E | 4p15.3 | 2 | 18875000 | 3438 | fs | fs common |
| chr04 | E | 4p15.3 | 2 | 19125000 | 2937 | fs | fs common |
| chr04 | E | 4p15.3 | 2 | 19375000 | 2542 | fs | fs common |
| chr04 | E | 4p15.3 | 2 | 19625000 | 2013 | fs | fs common |
| chr04 | E | 4p15.3 | 2 | 19875000 | 4069 | fs | fs common |
| chr04 | E | 4p15.3 | 2 | 20125000 | 2231 | fs | fs common |
| chr04 | E | 4p15.3 | 2 | 20375000 | 2392 | fs | fs common |
| chr04 | E | 4p15.3 | 2 | 20625000 | 3018 | fs | fs common |
| chr04 | E | 4p15.3 | 2 | 20875000 | 4006 | fs | fs common |
| chr04 | E | 4p15.3 | 2 | 21125000 | 3464 | fs | fs common |
| chr04 | E | 4p15.3 | 2 | 21375000 | 3562 | fs | fs common |
| chr04 | E | 4p15.3 | 2 | 21625000 | 2704 | fs | fs common |
| chr04 | E | 4p15.3 | 2 | 21875000 | 1879 | fs | fs common |

|       |   |        |   |          |      |    |           |
|-------|---|--------|---|----------|------|----|-----------|
| chr04 | E | 4p15.3 | 2 | 22125000 | 1897 | fs | fs common |
| chr04 | E | 4p15.3 | 2 | 22375000 | 4337 | fs | fs common |
| chr04 | E | 4p15.3 | 2 | 22625000 | 1770 | fs | fs common |
| chr04 | E | 4p15.3 | 2 | 22875000 | 2838 | fs | fs common |
| chr04 | B | 4p15.2 | . | 23125000 | 1922 | fs | fs common |
| chr04 | B | 4p15.2 | . | 23375000 | 2243 | fs | fs common |
| chr04 | B | 4p15.2 | . | 23625000 | 2965 | fs | fs common |
| chr04 | B | 4p15.2 | . | 23875000 | 3069 | fs | fs common |
| chr04 | B | 4p15.2 | . | 24125000 | 3360 | fs | fs common |
| chr04 | B | 4p15.2 | . | 24375000 | 3203 | fs | fs common |
| chr04 | B | 4p15.2 | . | 24625000 | 3010 | fs | fs common |
| chr04 | B | 4p15.2 | . | 24875000 | 3169 | fs | fs common |
| chr04 | B | 4p15.2 | . | 25125000 | 3043 | fs | fs common |
| chr04 | B | 4p15.2 | . | 25375000 | 3754 | fs | fs common |
| chr04 | B | 4p15.2 | . | 25625000 | 3000 | fs | fs common |
| chr04 | B | 4p15.2 | . | 25875000 | 5131 | fs | fs common |
| chr04 | B | 4p15.2 | . | 26125000 | 3415 | fs | fs common |
| chr04 | B | 4p15.2 | . | 26375000 | 1774 | fs | fs common |
| chr04 | B | 4p15.2 | . | 26625000 | 2186 | fs | fs common |
| chr04 | B | 4p15.2 | . | 26875000 | 2231 | fs | fs common |
| chr04 | B | 4p15.2 | . | 27125000 | 2349 | fs | fs common |
| chr04 | B | 4p15.2 | . | 27375000 | 2276 | fs | fs common |
| chr04 | B | 4p15.2 | . | 27625000 | 2340 | fs | fs common |
| chr04 | B | 4p15.2 | . | 27875000 | 4354 | fs | fs common |
| chr04 | B | 4p15.1 | . | 28125000 | 3160 | fs | fs common |
| chr04 | B | 4p15.1 | . | 28375000 | 2512 | fs | fs common |
| chr04 | B | 4p15.1 | . | 28625000 | 3865 | fs | fs common |
| chr04 | B | 4p15.1 | . | 28875000 | 3369 | fs | fs common |
| chr04 | B | 4p15.1 | . | 29125000 | 2852 | fs | fs common |
| chr04 | B | 4p15.1 | . | 29375000 | 2218 | fs | fs common |
| chr04 | B | 4p15.1 | . | 29625000 | 2661 | fs | fs common |
| chr04 | B | 4p15.1 | . | 29875000 | 3372 | fs | fs common |
| chr04 | B | 4p15.1 | . | 30125000 | 3031 | fs | fs common |
| chr04 | B | 4p15.1 | . | 30375000 | 1653 | fs | fs common |
| chr04 | B | 4p15.1 | . | 30625000 | 2876 | fs | fs common |
| chr04 | B | 4p15.1 | . | 30875000 | 2964 | fs | fs common |



|       |   |        |   |          |      |      |           |
|-------|---|--------|---|----------|------|------|-----------|
| chr04 | B | 4p15.1 | . | 31125000 | 2227 | fs   | fs common |
| chr04 | B | 4p15.1 | . | 31375000 | 3108 | fs   | fs common |
| chr04 | B | 4p15.1 | . | 31625000 | 1859 | fs   | fs common |
| chr04 | B | 4p15.1 | . | 31875000 | 3334 | fs   | fs common |
| chr04 | B | 4p15.1 | . | 32125000 | 3064 | fs   | fs common |
| chr04 | B | 4p15.1 | . | 32375000 | 1955 | fs   | fs common |
| chr04 | B | 4p15.1 | . | 32625000 | 2280 | fs   | fs common |
| chr04 | B | 4p15.1 | . | 32875000 | 4961 | fs   | fs common |
| chr04 | B | 4p15.1 | . | 33125000 | 2918 | fs   | fs common |
| chr04 | B | 4p15.1 | . | 33375000 | 1914 | fs   | fs common |
| chr04 | B | 4p15.1 | . | 33625000 | 2385 | fs   | fs common |
| chr04 | B | 4p15.1 | . | 33875000 | 1594 | fs   | fs common |
| chr04 | B | 4p15.1 | . | 34125000 | 2349 | fs   | fs common |
| chr04 | B | 4p15.1 | . | 34375000 | 2762 | fs   | fs common |
| chr04 | B | 4p15.1 | . | 34625000 | 2335 | fs   | fs common |
| chr04 | B | 4p15.1 | . | 34875000 | 2591 | fs   | fs common |
| chr04 | B | 4p15.1 | . | 35125000 | 3937 | fs   | fs common |
| chr04 | B | 4p15.1 | . | 35375000 | 2382 | fs   | fs common |
| chr04 | B | 4p14   | . | 35625000 | 2423 | nofs | nofs      |
| chr04 | B | 4p14   | . | 35875000 | 1897 | nofs | nofs      |
| chr04 | B | 4p14   | . | 36125000 | 1940 | nofs | nofs      |
| chr04 | B | 4p14   | . | 36375000 | 2089 | nofs | nofs      |
| chr04 | B | 4p14   | . | 36625000 | 2133 | nofs | nofs      |
| chr04 | B | 4p14   | . | 36875000 | 3483 | nofs | nofs      |
| chr04 | B | 4p14   | . | 37125000 | 3169 | nofs | nofs      |
| chr04 | B | 4p14   | . | 37375000 | 4317 | nofs | nofs      |
| chr04 | B | 4p14   | . | 37625000 | 4143 | nofs | nofs      |
| chr04 | B | 4p14   | . | 37875000 | 1827 | nofs | nofs      |
| chr04 | B | 4p14   | . | 38125000 | 3895 | nofs | nofs      |
| chr04 | B | 4p14   | . | 38375000 | 2105 | nofs | nofs      |
| chr04 | B | 4p14   | . | 38625000 | 5583 | nofs | nofs      |
| chr04 | B | 4p14   | . | 38875000 | 2795 | nofs | nofs      |
| chr04 | B | 4p14   | . | 39125000 | 2451 | nofs | nofs      |
| chr04 | B | 4p14   | . | 39375000 | 4761 | nofs | nofs      |
| chr04 | B | 4p14   | . | 39625000 | 5816 | nofs | nofs      |
| chr04 | B | 4p14   | . | 39875000 | 6383 | nofs | nofs      |

|       |   |      |   |          |       |      |      |
|-------|---|------|---|----------|-------|------|------|
| chr04 | B | 4p14 | . | 40125000 | 3193  | nofs | nofs |
| chr04 | B | 4p14 | . | 40375000 | 4484  | nofs | nofs |
| chr04 | B | 4p14 | . | 40625000 | 3292  | nofs | nofs |
| chr04 | B | 4p14 | . | 40875000 | 3337  | nofs | nofs |
| chr04 | E | 4p13 | 1 | 41125000 | 2411  | nofs | nofs |
| chr04 | E | 4p13 | 1 | 41375000 | 4279  | nofs | nofs |
| chr04 | E | 4p13 | 1 | 41625000 | 1700  | nofs | nofs |
| chr04 | E | 4p13 | 1 | 41875000 | 1846  | nofs | nofs |
| chr04 | E | 4p13 | 1 | 42125000 | 5423  | nofs | nofs |
| chr04 | E | 4p13 | 1 | 42375000 | 1764  | nofs | nofs |
| chr04 | E | 4p13 | 1 | 42625000 | 2265  | nofs | nofs |
| chr04 | E | 4p13 | 1 | 42875000 | 1247  | nofs | nofs |
| chr04 | E | 4p13 | 1 | 43125000 | 2929  | nofs | nofs |
| chr04 | E | 4p13 | 1 | 43375000 | 4698  | nofs | nofs |
| chr04 | E | 4p13 | 1 | 43625000 | 3406  | nofs | nofs |
| chr04 | E | 4p13 | 1 | 43875000 | 3027  | nofs | nofs |
| chr04 | E | 4p13 | 1 | 44125000 | 3300  | nofs | nofs |
| chr04 | E | 4p13 | 1 | 44375000 | 1507  | nofs | nofs |
| chr04 | E | 4p13 | 1 | 44625000 | 1504  | nofs | nofs |
| chr04 | E | 4p13 | 1 | 44875000 | 5117  | nofs | nofs |
| chr04 | E | 4p13 | 1 | 45125000 | 3942  | nofs | nofs |
| chr04 | E | 4p13 | 1 | 45375000 | 3012  | nofs | nofs |
| chr04 | E | 4p13 | 1 | 45625000 | 2537  | nofs | nofs |
| chr04 | E | 4p13 | 1 | 45875000 | 3487  | nofs | nofs |
| chr04 | E | 4p12 | 1 | 46125000 | 3141  | nofs | nofs |
| chr04 | C | 4p12 | 1 | 46375000 | 1490  | nofs | nofs |
| chr04 | C | 4p12 | 1 | 46625000 | 3696  | nofs | nofs |
| chr04 | C | 4p12 | 1 | 46875000 | 3277  | nofs | nofs |
| chr04 | C | 4p12 | 1 | 47125000 | 3170  | nofs | nofs |
| chr04 | C | 4p12 | 1 | 47375000 | 1830  | nofs | nofs |
| chr04 | C | 4p12 | 1 | 47625000 | 2690  | nofs | nofs |
| chr04 | C | 4p12 | 1 | 47875000 | 3464  | nofs | nofs |
| chr04 | C | 4p12 | 1 | 48125000 | 4439  | nofs | nofs |
| chr04 | C | 4p11 | . | 48375000 | 3655  | nofs | nofs |
| chr04 | C | 4p11 | . | 48625000 | 3524  | nofs | nofs |
| chr04 | C | 4p11 | . | 48875000 | 72719 | nofs | nofs |

|       |   |      |   |          |       |      |           |
|-------|---|------|---|----------|-------|------|-----------|
| chr04 | C | 4p11 | . | 49125000 | 24652 | nofs | nofs      |
| chr04 | C | 4p11 | . | 49375000 | 38786 | nofs | nofs      |
| chr04 | C |      | . | 49625000 | 1013  | nofs | nofs      |
| chr04 | C |      | . | 49875000 | 0     | nofs | nofs      |
| chr04 | C |      | . | 50125000 | 0     | nofs | nofs      |
| chr04 | C |      | . | 50375000 | 0     | nofs | nofs      |
| chr04 | C |      | . | 50625000 | 0     | nofs | nofs      |
| chr04 | C |      | . | 50875000 | 0     | nofs | nofs      |
| chr04 | C |      | . | 51125000 | 0     | nofs | nofs      |
| chr04 | C |      | . | 51375000 | 0     | nofs | nofs      |
| chr04 | C |      | . | 51625000 | 0     | nofs | nofs      |
| chr04 | C |      | . | 51875000 | 0     | nofs | nofs      |
| chr04 | C |      | . | 52125000 | 0     | nofs | nofs      |
| chr04 | C |      | . | 52375000 | 0     | nofs | nofs      |
| chr04 | C | 4q11 | . | 52625000 | 27949 | nofs | nofs      |
| chr04 | C | 4q11 | . | 52875000 | 2236  | nofs | nofs      |
| chr04 | C | 4q11 | . | 53125000 | 4690  | nofs | nofs      |
| chr04 | C | 4q11 | . | 53375000 | 3029  | nofs | nofs      |
| chr04 | C | 4q11 | . | 53625000 | 2286  | fs   | fs common |
| chr04 | C | 4q11 | . | 53875000 | 4608  | fs   | fs common |
| chr04 | C | 4q12 | 3 | 54125000 | 2376  | fs   | fs common |
| chr04 | C | 4q12 | 3 | 54375000 | 1572  | fs   | fs common |
| chr04 | C | 4q12 | 3 | 54625000 | 2852  | fs   | fs common |
| chr04 | C | 4q12 | 3 | 54875000 | 4408  | fs   | fs common |
| chr04 | C | 4q12 | 3 | 55125000 | 3184  | fs   | fs common |
| chr04 | C | 4q12 | 3 | 55375000 | 2102  | fs   | fs common |
| chr04 | C | 4q12 | 3 | 55625000 | 1942  | fs   | fs common |
| chr04 | E | 4q12 | 3 | 55875000 | 2380  | fs   | fs common |
| chr04 | E | 4q12 | 3 | 56125000 | 1957  | fs   | fs common |
| chr04 | E | 4q12 | 3 | 56375000 | 3355  | fs   | fs common |
| chr04 | E | 4q12 | 3 | 56625000 | 3014  | fs   | fs common |
| chr04 | E | 4q12 | 3 | 56875000 | 3151  | fs   | fs common |
| chr04 | E | 4q12 | 3 | 57125000 | 1504  | fs   | fs common |
| chr04 | E | 4q12 | 3 | 57375000 | 4023  | fs   | fs common |
| chr04 | E | 4q12 | 3 | 57625000 | 4272  | fs   | fs common |
| chr04 | E | 4q12 | 3 | 57875000 | 2028  | fs   | fs common |

|       |   |        |   |          |       |      |           |
|-------|---|--------|---|----------|-------|------|-----------|
| chr04 | E | 4q12   | 3 | 58125000 | 2904  | fs   | fs common |
| chr04 | E | 4q12   | 3 | 58375000 | 2177  | fs   | fs common |
| chr04 | E | 4q12   | 3 | 58625000 | 5854  | fs   | fs common |
| chr04 | E | 4q12   | 3 | 58875000 | 2694  | fs   | fs common |
| chr04 | E | 4q12   | 3 | 59125000 | 3024  | fs   | fs common |
| chr04 | E | 4q12   | 3 | 59375000 | 3146  | fs   | fs common |
| chr04 | E | 4q12   | 3 | 59625000 | 2309  | fs   | fs common |
| chr04 | B | 4q13.1 | . | 59875000 | 2698  | nofs | nofs      |
| chr04 | B | 4q13.1 | . | 60125000 | 3118  | nofs | nofs      |
| chr04 | B | 4q13.1 | . | 60375000 | 1881  | nofs | nofs      |
| chr04 | B | 4q13.1 | . | 60625000 | 3135  | nofs | nofs      |
| chr04 | B | 4q13.1 | . | 60875000 | 3729  | nofs | nofs      |
| chr04 | B | 4q13.1 | . | 61125000 | 2824  | nofs | nofs      |
| chr04 | B | 4q13.1 | . | 61375000 | 3151  | nofs | nofs      |
| chr04 | B | 4q13.1 | . | 61625000 | 2338  | nofs | nofs      |
| chr04 | B | 4q13.1 | . | 61875000 | 1994  | nofs | nofs      |
| chr04 | B | 4q13.1 | . | 62125000 | 2741  | nofs | nofs      |
| chr04 | B | 4q13.1 | . | 62375000 | 3369  | nofs | nofs      |
| chr04 | B | 4q13.1 | . | 62625000 | 3346  | nofs | nofs      |
| chr04 | B | 4q13.1 | . | 62875000 | 2018  | nofs | nofs      |
| chr04 | B | 4q13.1 | . | 63125000 | 2260  | nofs | nofs      |
| chr04 | B | 4q13.1 | . | 63375000 | 4162  | nofs | nofs      |
| chr04 | B | 4q13.1 | . | 63625000 | 3085  | nofs | nofs      |
| chr04 | B | 4q13.1 | . | 63875000 | 5321  | nofs | nofs      |
| chr04 | B | 4q13.1 | . | 64125000 | 15196 | nofs | nofs      |
| chr04 | B | 4q13.1 | . | 64375000 | 1748  | nofs | nofs      |
| chr04 | B | 4q13.1 | . | 64625000 | 4645  | nofs | nofs      |
| chr04 | B | 4q13.1 | . | 64875000 | 2260  | nofs | nofs      |
| chr04 | B | 4q13.1 | . | 65125000 | 1678  | nofs | nofs      |
| chr04 | B | 4q13.1 | . | 65375000 | 2153  | nofs | nofs      |
| chr04 | B | 4q13.1 | . | 65625000 | 3450  | nofs | nofs      |
| chr04 | B | 4q13.1 | . | 65875000 | 2651  | nofs | nofs      |
| chr04 | B | 4q13.1 | . | 66125000 | 2986  | nofs | nofs      |
| chr04 | B | 4q13.1 | . | 66375000 | 2231  | nofs | nofs      |
| chr04 | B | 4q13.1 | . | 66625000 | 1614  | nofs | nofs      |
| chr04 | B | 4q13.1 | . | 66875000 | 1791  | nofs | nofs      |

|       |   |        |   |          |      |      |      |
|-------|---|--------|---|----------|------|------|------|
| chr04 | B | 4q13.2 | . | 67125000 | 2109 | nofs | nofs |
| chr04 | B | 4q13.2 | . | 67375000 | 3124 | nofs | nofs |
| chr04 | B | 4q13.2 | . | 67625000 | 2933 | nofs | nofs |
| chr04 | B | 4q13.2 | . | 67875000 | 3198 | nofs | nofs |
| chr04 | B | 4q13.2 | . | 68125000 | 6077 | nofs | nofs |
| chr04 | B | 4q13.2 | . | 68375000 | 2780 | nofs | nofs |
| chr04 | B | 4q13.2 | . | 68625000 | 1483 | nofs | nofs |
| chr04 | B | 4q13.2 | . | 68875000 | 1936 | nofs | nofs |
| chr04 | B | 4q13.2 | . | 69125000 | 1660 | nofs | nofs |
| chr04 | B | 4q13.2 | . | 69375000 | 2123 | nofs | nofs |
| chr04 | B | 4q13.2 | . | 69625000 | 1769 | nofs | nofs |
| chr04 | B | 4q13.2 | . | 69875000 | 2228 | nofs | nofs |
| chr04 | B | 4q13.2 | . | 70125000 | 1788 | nofs | nofs |
| chr04 | E | 4q13.3 | 1 | 70375000 | 2009 | nofs | nofs |
| chr04 | E | 4q13.3 | 1 | 70625000 | 3630 | nofs | nofs |
| chr04 | E | 4q13.3 | 1 | 70875000 | 2739 | nofs | nofs |
| chr04 | E | 4q13.3 | 1 | 71125000 | 3172 | nofs | nofs |
| chr04 | E | 4q13.3 | 1 | 71375000 | 1814 | nofs | nofs |
| chr04 | E | 4q13.3 | 1 | 71625000 | 5831 | nofs | nofs |
| chr04 | E | 4q13.3 | 1 | 71875000 | 1814 | nofs | nofs |
| chr04 | E | 4q13.3 | 1 | 72125000 | 2249 | nofs | nofs |
| chr04 | E | 4q13.3 | 1 | 72375000 | 2900 | nofs | nofs |
| chr04 | E | 4q13.3 | 1 | 72625000 | 1512 | nofs | nofs |
| chr04 | E | 4q13.3 | 1 | 72875000 | 1737 | nofs | nofs |
| chr04 | E | 4q13.3 | 1 | 73125000 | 2611 | nofs | nofs |
| chr04 | E | 4q13.3 | 1 | 73375000 | 1804 | nofs | nofs |
| chr04 | E | 4q13.3 | 1 | 73625000 | 3636 | nofs | nofs |
| chr04 | E | 4q13.3 | 1 | 73875000 | 2852 | nofs | nofs |
| chr04 | E | 4q13.3 | 1 | 74125000 | 1594 | nofs | nofs |
| chr04 | E | 4q13.3 | 1 | 74375000 | 2171 | nofs | nofs |
| chr04 | E | 4q13.3 | 1 | 74625000 | 2849 | nofs | nofs |
| chr04 | E | 4q13.3 | 1 | 74875000 | 3145 | nofs | nofs |
| chr04 | E | 4q13.3 | 1 | 75125000 | 1935 | nofs | nofs |
| chr04 | E | 4q13.3 | 1 | 75375000 | 2021 | nofs | nofs |
| chr04 | E | 4q13.3 | 1 | 75625000 | 2506 | nofs | nofs |
| chr04 | E | 4q13.3 | 1 | 75875000 | 1407 | nofs | nofs |

|       |   |        |   |          |      |      |      |
|-------|---|--------|---|----------|------|------|------|
| chr04 | E | 4q13.3 | 1 | 76125000 | 1471 | nofs | nofs |
| chr04 | E | 4q13.3 | 1 | 76375000 | 2251 | nofs | nofs |
| chr04 | E | 4q13.3 | 1 | 76625000 | 1252 | nofs | nofs |
| chr04 | E | 4q21.1 | 3 | 76875000 | 2113 | nofs | nofs |
| chr04 | E | 4q21.1 | 3 | 77125000 | 3119 | nofs | nofs |
| chr04 | E | 4q21.1 | 3 | 77375000 | 3768 | nofs | nofs |
| chr04 | E | 4q21.1 | 3 | 77625000 | 1864 | nofs | nofs |
| chr04 | E | 4q21.1 | 3 | 77875000 | 1936 | nofs | nofs |
| chr04 | E | 4q21.1 | 3 | 78125000 | 3490 | nofs | nofs |
| chr04 | E | 4q21.1 | 3 | 78375000 | 2297 | nofs | nofs |
| chr04 | E | 4q21.1 | 3 | 78625000 | 1485 | nofs | nofs |
| chr04 | E | 4q21.1 | 3 | 78875000 | 1978 | nofs | nofs |
| chr04 | E | 4q21.1 | 3 | 79125000 | 2483 | nofs | nofs |
| chr04 | E | 4q21.2 | 2 | 79375000 | 3327 | nofs | nofs |
| chr04 | E | 4q21.2 | 2 | 79625000 | 1462 | nofs | nofs |
| chr04 | E | 4q21.2 | 2 | 79875000 | 2953 | nofs | nofs |
| chr04 | E | 4q21.2 | 2 | 80125000 | 2602 | nofs | nofs |
| chr04 | E | 4q21.2 | 2 | 80375000 | 1929 | nofs | nofs |
| chr04 | E | 4q21.2 | 2 | 80625000 | 4415 | nofs | nofs |
| chr04 | E | 4q21.2 | 2 | 80875000 | 2166 | nofs | nofs |
| chr04 | E | 4q21.2 | 2 | 81125000 | 1957 | nofs | nofs |
| chr04 | E | 4q21.2 | 2 | 81375000 | 2612 | nofs | nofs |
| chr04 | E | 4q21.2 | 2 | 81625000 | 2458 | nofs | nofs |
| chr04 | E | 4q21.2 | 2 | 81875000 | 1717 | nofs | nofs |
| chr04 | E | 4q21.2 | 2 | 82125000 | 4113 | nofs | nofs |
| chr04 | E | 4q21.2 | 2 | 82375000 | 1512 | nofs | nofs |
| chr04 | E | 4q21.2 | 2 | 82625000 | 1952 | nofs | nofs |
| chr04 | E | 4q21.2 | 2 | 82875000 | 3155 | nofs | nofs |
| chr04 | E | 4q21.2 | 2 | 83125000 | 2775 | nofs | nofs |
| chr04 | E | 4q21.2 | 2 | 83375000 | 2212 | nofs | nofs |
| chr04 | E | 4q21.2 | 2 | 83625000 | 4206 | nofs | nofs |
| chr04 | E | 4q21.2 | 2 | 83875000 | 3247 | nofs | nofs |
| chr04 | E | 4q21.2 | 2 | 84125000 | 2517 | nofs | nofs |
| chr04 | E | 4q21.2 | 2 | 84375000 | 5667 | nofs | nofs |
| chr04 | E | 4q21.2 | 2 | 84625000 | 2082 | nofs | nofs |
| chr04 | E | 4q21.2 | 2 | 84875000 | 5364 | nofs | nofs |

|       |   |        |   |          |      |      |           |
|-------|---|--------|---|----------|------|------|-----------|
| chr04 | E | 4q21.2 | 2 | 85125000 | 3056 | nofs | nofs      |
| chr04 | E | 4q21.2 | 2 | 85375000 | 1108 | nofs | nofs      |
| chr04 | E | 4q21.2 | 2 | 85625000 | 1046 | nofs | nofs      |
| chr04 | E | 4q21.2 | 2 | 85875000 | 2286 | nofs | nofs      |
| chr04 | E | 4q21.2 | 2 | 86125000 | 1776 | nofs | nofs      |
| chr04 | E | 4q21.2 | 2 | 86375000 | 1971 | nofs | nofs      |
| chr04 | E | 4q21.2 | 2 | 86625000 | 1999 | nofs | nofs      |
| chr04 | E | 4q21.2 | 2 | 86875000 | 3650 | nofs | nofs      |
| chr04 | E | 4q21.2 | 2 | 87125000 | 3196 | nofs | nofs      |
| chr04 | E | 4q21.2 | 2 | 87375000 | 1681 | nofs | nofs      |
| chr04 | B | 4q21.3 | . | 87625000 | 2674 | nofs | nofs      |
| chr04 | B | 4q21.3 | . | 87875000 | 2672 | nofs | nofs      |
| chr04 | B | 4q21.3 | . | 88125000 | 2898 | nofs | nofs      |
| chr04 | B | 4q21.3 | . | 88375000 | 3107 | nofs | nofs      |
| chr04 | E | 4q22   | 4 | 88625000 | 2824 | fs   | fs common |
| chr04 | E | 4q22   | 4 | 88875000 | 5277 | fs   | fs common |
| chr04 | E | 4q22   | 4 | 89125000 | 2277 | fs   | fs common |
| chr04 | E | 4q22   | 4 | 89375000 | 2742 | fs   | fs common |
| chr04 | E | 4q22   | 4 | 89625000 | 5143 | fs   | fs common |
| chr04 | E | 4q22   | 4 | 89875000 | 2695 | fs   | fs common |
| chr04 | E | 4q22   | 4 | 90125000 | 2417 | fs   | fs common |
| chr04 | E | 4q22   | 4 | 90375000 | 2628 | fs   | fs common |
| chr04 | E | 4q22   | 4 | 90625000 | 1560 | fs   | fs common |
| chr04 | E | 4q22   | 4 | 90875000 | 2788 | fs   | fs common |
| chr04 | E | 4q22   | 4 | 91125000 | 1516 | fs   | fs common |
| chr04 | E | 4q22   | 4 | 91375000 | 1351 | fs   | fs common |
| chr04 | E | 4q22   | 4 | 91625000 | 2443 | fs   | fs common |
| chr04 | E | 4q22   | 4 | 91875000 | 1828 | fs   | fs common |
| chr04 | E | 4q22   | 4 | 92125000 | 3023 | fs   | fs common |
| chr04 | E | 4q22   | 4 | 92375000 | 2462 | fs   | fs common |
| chr04 | E | 4q22   | 4 | 92625000 | 1640 | fs   | fs common |
| chr04 | E | 4q22   | 4 | 92875000 | 2867 | fs   | fs common |
| chr04 | E | 4q22   | 4 | 93125000 | 2541 | fs   | fs common |
| chr04 | E | 4q22   | 4 | 93375000 | 2655 | fs   | fs common |
| chr04 | E | 4q22   | 4 | 93625000 | 2878 | fs   | fs common |
| chr04 | E | 4q22   | 4 | 93875000 | 2671 | fs   | fs common |

|       |   |      |   |           |      |      |           |
|-------|---|------|---|-----------|------|------|-----------|
| chr04 | E | 4q22 | 4 | 94125000  | 1319 | fs   | fs common |
| chr04 | E | 4q22 | 4 | 94375000  | 2387 | fs   | fs common |
| chr04 | E | 4q22 | 4 | 94625000  | 3282 | fs   | fs common |
| chr04 | E | 4q22 | 4 | 94875000  | 1282 | fs   | fs common |
| chr04 | E | 4q22 | 4 | 95125000  | 2609 | fs   | fs common |
| chr04 | E | 4q22 | 4 | 95375000  | 3170 | fs   | fs common |
| chr04 | E | 4q22 | 4 | 95625000  | 2222 | fs   | fs common |
| chr04 | E | 4q22 | 4 | 95875000  | 2192 | fs   | fs common |
| chr04 | E | 4q22 | 4 | 96125000  | 1864 | fs   | fs common |
| chr04 | E | 4q22 | 4 | 96375000  | 4507 | fs   | fs common |
| chr04 | E | 4q22 | 4 | 96625000  | 1216 | fs   | fs common |
| chr04 | E | 4q22 | 4 | 96875000  | 1338 | fs   | fs common |
| chr04 | E | 4q22 | 4 | 97125000  | 1663 | fs   | fs common |
| chr04 | E | 4q22 | 4 | 97375000  | 2238 | fs   | fs common |
| chr04 | E | 4q22 | 4 | 97625000  | 2027 | fs   | fs common |
| chr04 | E | 4q22 | 4 | 97875000  | 2534 | fs   | fs common |
| chr04 | E | 4q22 | 4 | 98125000  | 2310 | fs   | fs common |
| chr04 | E | 4q22 | 4 | 98375000  | 2102 | fs   | fs common |
| chr04 | E | 4q22 | 4 | 98625000  | 3274 | fs   | fs common |
| chr04 | E | 4q22 | 4 | 98875000  | 2432 | fs   | fs common |
| chr04 | E | 4q22 | 4 | 99125000  | 2304 | fs   | fs common |
| chr04 | E | 4q22 | 4 | 99375000  | 2266 | fs   | fs common |
| chr04 | B | 4q23 | . | 99625000  | 2593 | nofs | nofs      |
| chr04 | B | 4q23 | . | 99875000  | 1053 | nofs | nofs      |
| chr04 | B | 4q23 | . | 100000000 | 2761 | nofs | nofs      |
| chr04 | B | 4q23 | . | 100000000 | 2631 | nofs | nofs      |
| chr04 | B | 4q23 | . | 101000000 | 3130 | nofs | nofs      |
| chr04 | B | 4q23 | . | 101000000 | 1894 | nofs | nofs      |
| chr04 | B | 4q23 | . | 101000000 | 2335 | nofs | nofs      |
| chr04 | B | 4q23 | . | 101000000 | 3340 | nofs | nofs      |
| chr04 | B | 4q24 | . | 102000000 | 2067 | nofs | nofs      |
| chr04 | B | 4q24 | . | 102000000 | 3176 | nofs | nofs      |
| chr04 | B | 4q24 | . | 102000000 | 2423 | nofs | nofs      |
| chr04 | B | 4q24 | . | 102000000 | 2807 | nofs | nofs      |
| chr04 | B | 4q24 | . | 103000000 | 2845 | nofs | nofs      |
| chr04 | B | 4q24 | . | 103000000 | 1914 | nofs | nofs      |



|       |   |      |   |           |      |      |      |
|-------|---|------|---|-----------|------|------|------|
| chr04 | B | 4q24 | . | 103000000 | 3315 | nofs | nofs |
| chr04 | B | 4q24 | . | 103000000 | 4053 | nofs | nofs |
| chr04 | B | 4q24 | . | 104000000 | 6337 | nofs | nofs |
| chr04 | B | 4q24 | . | 104000000 | 2814 | nofs | nofs |
| chr04 | B | 4q24 | . | 104000000 | 1744 | nofs | nofs |
| chr04 | B | 4q24 | . | 104000000 | 2605 | nofs | nofs |
| chr04 | B | 4q24 | . | 105000000 | 2389 | nofs | nofs |
| chr04 | B | 4q24 | . | 105000000 | 2914 | nofs | nofs |
| chr04 | B | 4q24 | . | 105000000 | 4146 | nofs | nofs |
| chr04 | B | 4q24 | . | 105000000 | 2419 | nofs | nofs |
| chr04 | B | 4q24 | . | 106000000 | 1592 | nofs | nofs |
| chr04 | B | 4q24 | . | 106000000 | 2282 | nofs | nofs |
| chr04 | B | 4q24 | . | 106000000 | 2022 | nofs | nofs |
| chr04 | B | 4q24 | . | 106000000 | 1897 | nofs | nofs |
| chr04 | B | 4q24 | . | 107000000 | 2100 | nofs | nofs |
| chr04 | B | 4q24 | . | 107000000 | 1945 | nofs | nofs |
| chr04 | B | 4q24 | . | 107000000 | 1822 | nofs | nofs |
| chr04 | B | 4q24 | . | 107000000 | 2421 | nofs | nofs |
| chr04 | B | 4q24 | . | 108000000 | 2637 | nofs | nofs |
| chr04 | B | 4q24 | . | 108000000 | 2213 | nofs | nofs |
| chr04 | B | 4q24 | . | 108000000 | 1948 | nofs | nofs |
| chr04 | B | 4q25 | . | 108000000 | 2521 | nofs | nofs |
| chr04 | B | 4q25 | . | 109000000 | 3682 | nofs | nofs |
| chr04 | B | 4q25 | . | 109000000 | 1914 | nofs | nofs |
| chr04 | B | 4q25 | . | 109000000 | 1805 | nofs | nofs |
| chr04 | B | 4q25 | . | 109000000 | 2636 | nofs | nofs |
| chr04 | B | 4q25 | . | 110000000 | 3121 | nofs | nofs |
| chr04 | B | 4q25 | . | 110000000 | 3271 | nofs | nofs |
| chr04 | B | 4q25 | . | 110000000 | 3851 | nofs | nofs |
| chr04 | B | 4q25 | . | 110000000 | 2748 | nofs | nofs |
| chr04 | B | 4q25 | . | 111000000 | 2128 | nofs | nofs |
| chr04 | B | 4q25 | . | 111000000 | 4239 | nofs | nofs |
| chr04 | B | 4q25 | . | 111000000 | 3958 | nofs | nofs |
| chr04 | B | 4q25 | . | 111000000 | 2530 | nofs | nofs |
| chr04 | B | 4q25 | . | 112000000 | 3868 | nofs | nofs |
| chr04 | B | 4q25 | . | 112000000 | 1535 | nofs | nofs |

|       |   |      |   |           |      |      |      |
|-------|---|------|---|-----------|------|------|------|
| chr04 | B | 4q25 | . | 112000000 | 2847 | nofs | nofs |
| chr04 | B | 4q25 | . | 112000000 | 2291 | nofs | nofs |
| chr04 | B | 4q25 | . | 113000000 | 1703 | nofs | nofs |
| chr04 | B | 4q25 | . | 113000000 | 2291 | nofs | nofs |
| chr04 | B | 4q25 | . | 113000000 | 2739 | nofs | nofs |
| chr04 | B | 4q25 | . | 113000000 | 1998 | nofs | nofs |
| chr04 | B | 4q25 | . | 114000000 | 1678 | nofs | nofs |
| chr04 | B | 4q25 | . | 114000000 | 2895 | nofs | nofs |
| chr04 | B | 4q25 | . | 114000000 | 3356 | nofs | nofs |
| chr04 | B | 4q25 | . | 114000000 | 2326 | nofs | nofs |
| chr04 | B | 4q26 | 3 | 115000000 | 2709 | nofs | nofs |
| chr04 | E | 4q26 | 3 | 115000000 | 1643 | nofs | nofs |
| chr04 | E | 4q26 | 3 | 115000000 | 2014 | nofs | nofs |
| chr04 | E | 4q26 | 3 | 115000000 | 3209 | nofs | nofs |
| chr04 | E | 4q26 | 3 | 116000000 | 2549 | nofs | nofs |
| chr04 | E | 4q26 | 3 | 116000000 | 3836 | nofs | nofs |
| chr04 | E | 4q26 | 3 | 116000000 | 2433 | nofs | nofs |
| chr04 | E | 4q26 | 3 | 116000000 | 3158 | nofs | nofs |
| chr04 | E | 4q26 | 3 | 117000000 | 2423 | nofs | nofs |
| chr04 | E | 4q26 | 3 | 117000000 | 2502 | nofs | nofs |
| chr04 | E | 4q26 | 3 | 117000000 | 3117 | nofs | nofs |
| chr04 | E | 4q26 | 3 | 117000000 | 2067 | nofs | nofs |
| chr04 | E | 4q26 | 3 | 118000000 | 2072 | nofs | nofs |
| chr04 | E | 4q26 | 3 | 118000000 | 2543 | nofs | nofs |
| chr04 | E | 4q26 | 3 | 118000000 | 2017 | nofs | nofs |
| chr04 | E | 4q26 | 3 | 118000000 | 2979 | nofs | nofs |
| chr04 | E | 4q26 | 3 | 119000000 | 2307 | nofs | nofs |
| chr04 | E | 4q26 | 3 | 119000000 | 2024 | nofs | nofs |
| chr04 | E | 4q26 | 3 | 119000000 | 2674 | nofs | nofs |
| chr04 | E | 4q26 | 3 | 119000000 | 2508 | nofs | nofs |
| chr04 | E | 4q26 | 3 | 120000000 | 2574 | nofs | nofs |
| chr04 | E | 4q26 | 3 | 120000000 | 3633 | nofs | nofs |
| chr04 | E | 4q26 | 3 | 120000000 | 2624 | nofs | nofs |
| chr04 | E | 4q26 | 3 | 120000000 | 2317 | nofs | nofs |
| chr04 | E | 4q26 | 3 | 121000000 | 2507 | nofs | nofs |
| chr04 | E | 4q26 | 3 | 121000000 | 1236 | nofs | nofs |

|       |   |      |   |           |      |      |      |
|-------|---|------|---|-----------|------|------|------|
| chr04 | E | 4q26 | 3 | 121000000 | 1578 | nofs | nofs |
| chr04 | E | 4q27 | 4 | 121000000 | 3040 | nofs | nofs |
| chr04 | E | 4q27 | 4 | 122000000 | 2178 | nofs | nofs |
| chr04 | E | 4q27 | 4 | 122000000 | 2076 | nofs | nofs |
| chr04 | E | 4q27 | 4 | 122000000 | 1959 | nofs | nofs |
| chr04 | E | 4q27 | 4 | 122000000 | 2214 | nofs | nofs |
| chr04 | E | 4q27 | 4 | 123000000 | 2902 | nofs | nofs |
| chr04 | E | 4q27 | 4 | 123000000 | 3187 | nofs | nofs |
| chr04 | E | 4q27 | 4 | 123000000 | 1723 | nofs | nofs |
| chr04 | E | 4q27 | 4 | 123000000 | 1626 | nofs | nofs |
| chr04 | E | 4q27 | 4 | 124000000 | 1796 | nofs | nofs |
| chr04 | E | 4q27 | 4 | 124000000 | 1976 | nofs | nofs |
| chr04 | E | 4q27 | 4 | 124000000 | 4083 | nofs | nofs |
| chr04 | E | 4q27 | 4 | 124000000 | 4416 | nofs | nofs |
| chr04 | E | 4q28 | 1 | 125000000 | 2077 | nofs | nofs |
| chr04 | E | 4q28 | 1 | 125000000 | 4038 | nofs | nofs |
| chr04 | E | 4q28 | 1 | 125000000 | 1586 | nofs | nofs |
| chr04 | E | 4q28 | 1 | 125000000 | 1356 | nofs | nofs |
| chr04 | E | 4q28 | 1 | 126000000 | 2041 | nofs | nofs |
| chr04 | E | 4q28 | 1 | 126000000 | 1983 | nofs | nofs |
| chr04 | E | 4q28 | 1 | 126000000 | 3023 | nofs | nofs |
| chr04 | E | 4q28 | 1 | 126000000 | 3239 | nofs | nofs |
| chr04 | E | 4q28 | 1 | 127000000 | 2183 | nofs | nofs |
| chr04 | E | 4q28 | 1 | 127000000 | 2266 | nofs | nofs |
| chr04 | E | 4q28 | 1 | 127000000 | 3120 | nofs | nofs |
| chr04 | E | 4q28 | 1 | 127000000 | 2354 | nofs | nofs |
| chr04 | E | 4q28 | 1 | 128000000 | 2250 | nofs | nofs |
| chr04 | E | 4q28 | 1 | 128000000 | 2488 | nofs | nofs |
| chr04 | E | 4q28 | 1 | 128000000 | 4682 | nofs | nofs |
| chr04 | E | 4q28 | 1 | 128000000 | 1814 | nofs | nofs |
| chr04 | E | 4q28 | 1 | 129000000 | 2883 | nofs | nofs |
| chr04 | E | 4q28 | 1 | 129000000 | 1881 | nofs | nofs |
| chr04 | E | 4q28 | 1 | 129000000 | 3160 | nofs | nofs |
| chr04 | E | 4q28 | 1 | 129000000 | 3713 | nofs | nofs |
| chr04 | E | 4q28 | 1 | 130000000 | 1778 | nofs | nofs |
| chr04 | E | 4q28 | 1 | 130000000 | 3115 | nofs | nofs |

|       |   |      |   |           |      |      |      |
|-------|---|------|---|-----------|------|------|------|
| chr04 | E | 4q28 | 1 | 130000000 | 2868 | nofs | nofs |
| chr04 | E | 4q28 | 1 | 130000000 | 1526 | nofs | nofs |
| chr04 | E | 4q28 | 1 | 131000000 | 2051 | nofs | nofs |
| chr04 | E | 4q28 | 1 | 131000000 | 1783 | nofs | nofs |
| chr04 | E | 4q28 | 1 | 131000000 | 1579 | nofs | nofs |
| chr04 | E | 4q28 | 1 | 131000000 | 3110 | nofs | nofs |
| chr04 | E | 4q28 | 1 | 132000000 | 1707 | nofs | nofs |
| chr04 | E | 4q28 | 1 | 132000000 | 2219 | nofs | nofs |
| chr04 | E | 4q28 | 1 | 132000000 | 2693 | nofs | nofs |
| chr04 | E | 4q28 | 1 | 132000000 | 3157 | nofs | nofs |
| chr04 | E | 4q28 | 1 | 133000000 | 2708 | nofs | nofs |
| chr04 | E | 4q28 | 1 | 133000000 | 1679 | nofs | nofs |
| chr04 | E | 4q28 | 1 | 133000000 | 2633 | nofs | nofs |
| chr04 | E | 4q28 | 1 | 133000000 | 2546 | nofs | nofs |
| chr04 | E | 4q28 | 1 | 134000000 | 3469 | nofs | nofs |
| chr04 | E | 4q28 | 1 | 134000000 | 2031 | nofs | nofs |
| chr04 | E | 4q28 | 1 | 134000000 | 1682 | nofs | nofs |
| chr04 | E | 4q28 | 1 | 134000000 | 2035 | nofs | nofs |
| chr04 | E | 4q28 | 1 | 135000000 | 2447 | nofs | nofs |
| chr04 | E | 4q28 | 1 | 135000000 | 2391 | nofs | nofs |
| chr04 | E | 4q28 | 1 | 135000000 | 2562 | nofs | nofs |
| chr04 | E | 4q28 | 1 | 135000000 | 1836 | nofs | nofs |
| chr04 | E | 4q28 | 1 | 136000000 | 1559 | nofs | nofs |
| chr04 | E | 4q28 | 1 | 136000000 | 5125 | nofs | nofs |
| chr04 | E | 4q28 | 1 | 136000000 | 2760 | nofs | nofs |
| chr04 | E | 4q28 | 1 | 136000000 | 3330 | nofs | nofs |
| chr04 | E | 4q28 | 1 | 137000000 | 2060 | nofs | nofs |
| chr04 | E | 4q28 | 1 | 137000000 | 2948 | nofs | nofs |
| chr04 | E | 4q28 | 1 | 137000000 | 1764 | nofs | nofs |
| chr04 | E | 4q28 | 1 | 137000000 | 2235 | nofs | nofs |
| chr04 | E | 4q28 | 1 | 138000000 | 3535 | nofs | nofs |
| chr04 | E | 4q28 | 1 | 138000000 | 2437 | nofs | nofs |
| chr04 | E | 4q28 | 1 | 138000000 | 1810 | nofs | nofs |
| chr04 | E | 4q28 | 1 | 138000000 | 3814 | nofs | nofs |
| chr04 | E | 4q28 | 1 | 139000000 | 1547 | nofs | nofs |
| chr04 | E | 4q28 | 1 | 139000000 | 1939 | nofs | nofs |

|       |   |        |   |           |      |      |           |
|-------|---|--------|---|-----------|------|------|-----------|
| chr04 | E | 4q28   | 1 | 139000000 | 3117 | nofs | nofs      |
| chr04 | E | 4q28   | 1 | 139000000 | 2632 | nofs | nofs      |
| chr04 | E | 4q28   | 1 | 140000000 | 1675 | nofs | nofs      |
| chr04 | E | 4q28   | 1 | 140000000 | 2206 | nofs | nofs      |
| chr04 | E | 4q31.1 | 2 | 140000000 | 3703 | fs   | fs common |
| chr04 | E | 4q31.1 | 2 | 140000000 | 3660 | fs   | fs common |
| chr04 | E | 4q31.1 | 2 | 141000000 | 3147 | fs   | fs common |
| chr04 | E | 4q31.1 | 2 | 141000000 | 2547 | fs   | fs common |
| chr04 | E | 4q31.1 | 2 | 141000000 | 2386 | fs   | fs common |
| chr04 | E | 4q31.1 | 2 | 141000000 | 2623 | fs   | fs common |
| chr04 | E | 4q31.1 | 2 | 142000000 | 2394 | fs   | fs common |
| chr04 | E | 4q31.1 | 2 | 142000000 | 1532 | fs   | fs common |
| chr04 | E | 4q31.1 | 2 | 142000000 | 4385 | nofs | nofs      |
| chr04 | E | 4q31.2 | 3 | 142000000 | 3560 | nofs | nofs      |
| chr04 | E | 4q31.2 | 3 | 142000000 | 1970 | nofs | nofs      |
| chr04 | E | 4q31.2 | 3 | 143000000 | 3427 | nofs | nofs      |
| chr04 | E | 4q31.2 | 3 | 143000000 | 1965 | nofs | nofs      |
| chr04 | E | 4q31.2 | 3 | 143000000 | 1436 | nofs | nofs      |
| chr04 | E | 4q31.2 | 3 | 144000000 | 1957 | nofs | nofs      |
| chr04 | E | 4q31.2 | 3 | 144000000 | 2426 | nofs | nofs      |
| chr04 | E | 4q31.2 | 3 | 144000000 | 2393 | nofs | nofs      |
| chr04 | E | 4q31.2 | 3 | 144000000 | 1774 | nofs | nofs      |
| chr04 | E | 4q31.2 | 3 | 145000000 | 2191 | nofs | nofs      |
| chr04 | E | 4q31.2 | 3 | 145000000 | 1086 | nofs | nofs      |
| chr04 | E | 4q31.2 | 3 | 145000000 | 2788 | nofs | nofs      |
| chr04 | E | 4q31.2 | 3 | 145000000 | 1824 | nofs | nofs      |
| chr04 | E | 4q31.2 | 3 | 146000000 | 2780 | nofs | nofs      |
| chr04 | E | 4q31.2 | 3 | 146000000 | 1327 | nofs | nofs      |
| chr04 | E | 4q31.2 | 3 | 146000000 | 1983 | nofs | nofs      |
| chr04 | E | 4q31.2 | 3 | 146000000 | 3738 | nofs | nofs      |
| chr04 | E | 4q31.2 | 3 | 147000000 | 2122 | nofs | nofs      |
| chr04 | E | 4q31.2 | 3 | 147000000 | 2902 | nofs | nofs      |
| chr04 | E | 4q31.2 | 3 | 147000000 | 3773 | nofs | nofs      |
| chr04 | E | 4q31.2 | 3 | 147000000 | 2967 | nofs | nofs      |
| chr04 | E | 4q31.2 | 3 | 148000000 | 2703 | nofs | nofs      |
| chr04 | E | 4q31.2 | 3 | 148000000 | 2465 | nofs | nofs      |

|       |   |        |   |           |      |      |      |
|-------|---|--------|---|-----------|------|------|------|
| chr04 | E | 4q31.2 | 3 | 148000000 | 1866 | nofs | nofs |
| chr04 | E | 4q31.2 | 3 | 148000000 | 2568 | nofs | nofs |
| chr04 | E | 4q31.2 | 3 | 149000000 | 3344 | nofs | nofs |
| chr04 | E | 4q31.2 | 3 | 149000000 | 3582 | nofs | nofs |
| chr04 | E | 4q31.2 | 3 | 149000000 | 3937 | nofs | nofs |
| chr04 | E | 4q31.2 | 3 | 149000000 | 1172 | nofs | nofs |
| chr04 | E | 4q31.2 | 3 | 150000000 | 2041 | nofs | nofs |
| chr04 | E | 4q31.2 | 3 | 150000000 | 5725 | nofs | nofs |
| chr04 | E | 4q31.2 | 3 | 150000000 | 2943 | nofs | nofs |
| chr04 | E | 4q31.2 | 3 | 150000000 | 1979 | nofs | nofs |
| chr04 | E | 4q31.2 | 3 | 151000000 | 3002 | nofs | nofs |
| chr04 | E | 4q31.2 | 3 | 151000000 | 1171 | nofs | nofs |
| chr04 | E | 4q31.2 | 3 | 151000000 | 2519 | nofs | nofs |
| chr04 | E | 4q31.2 | 3 | 151000000 | 2776 | nofs | nofs |
| chr04 | E | 4q31.2 | 3 | 152000000 | 3699 | nofs | nofs |
| chr04 | E | 4q31.2 | 3 | 152000000 | 4046 | nofs | nofs |
| chr04 | E | 4q31.3 | 1 | 152000000 | 4986 | nofs | nofs |
| chr04 | E | 4q31.3 | 1 | 152000000 | 4363 | nofs | nofs |
| chr04 | E | 4q31.3 | 1 | 153000000 | 4237 | nofs | nofs |
| chr04 | E | 4q31.3 | 1 | 153000000 | 2244 | nofs | nofs |
| chr04 | E | 4q31.3 | 1 | 153000000 | 1832 | nofs | nofs |
| chr04 | E | 4q31.3 | 1 | 153000000 | 3041 | nofs | nofs |
| chr04 | E | 4q31.3 | 1 | 154000000 | 1165 | nofs | nofs |
| chr04 | E | 4q31.3 | 1 | 154000000 | 3690 | nofs | nofs |
| chr04 | E | 4q31.3 | 1 | 154000000 | 5928 | nofs | nofs |
| chr04 | E | 4q31.3 | 1 | 154000000 | 5599 | nofs | nofs |
| chr04 | E | 4q31.3 | 1 | 155000000 | 2944 | nofs | nofs |
| chr04 | E | 4q31.3 | 1 | 155000000 | 3486 | nofs | nofs |
| chr04 | E | 4q31.3 | 1 | 155000000 | 2625 | nofs | nofs |
| chr04 | E | 4q31.3 | 1 | 155000000 | 2301 | nofs | nofs |
| chr04 | E | 4q31.3 | 1 | 156000000 | 1983 | nofs | nofs |
| chr04 | E | 4q31.3 | 1 | 156000000 | 2178 | nofs | nofs |
| chr04 | E | 4q32   | 5 | 156000000 | 1712 | nofs | nofs |
| chr04 | E | 4q32   | 5 | 156000000 | 2433 | nofs | nofs |
| chr04 | E | 4q32   | 5 | 157000000 | 2598 | nofs | nofs |
| chr04 | E | 4q32   | 5 | 157000000 | 3616 | nofs | nofs |

|       |   |      |   |           |      |      |      |
|-------|---|------|---|-----------|------|------|------|
| chr04 | E | 4q32 | 5 | 157000000 | 2292 | nofs | nofs |
| chr04 | E | 4q32 | 5 | 157000000 | 2614 | nofs | nofs |
| chr04 | E | 4q32 | 5 | 158000000 | 1905 | nofs | nofs |
| chr04 | E | 4q32 | 5 | 158000000 | 1941 | nofs | nofs |
| chr04 | E | 4q32 | 5 | 158000000 | 3574 | nofs | nofs |
| chr04 | E | 4q32 | 5 | 158000000 | 1878 | nofs | nofs |
| chr04 | E | 4q32 | 5 | 159000000 | 3262 | nofs | nofs |
| chr04 | E | 4q32 | 5 | 159000000 | 2577 | nofs | nofs |
| chr04 | E | 4q32 | 5 | 159000000 | 2284 | nofs | nofs |
| chr04 | E | 4q32 | 5 | 159000000 | 4444 | nofs | nofs |
| chr04 | E | 4q32 | 5 | 160000000 | 2126 | nofs | nofs |
| chr04 | E | 4q32 | 5 | 160000000 | 3015 | nofs | nofs |
| chr04 | E | 4q32 | 5 | 160000000 | 4026 | nofs | nofs |
| chr04 | E | 4q32 | 5 | 160000000 | 2279 | nofs | nofs |
| chr04 | E | 4q32 | 5 | 161000000 | 4462 | nofs | nofs |
| chr04 | E | 4q32 | 5 | 161000000 | 2772 | nofs | nofs |
| chr04 | E | 4q32 | 5 | 161000000 | 3635 | nofs | nofs |
| chr04 | E | 4q32 | 5 | 161000000 | 3094 | nofs | nofs |
| chr04 | E | 4q32 | 5 | 162000000 | 3267 | nofs | nofs |
| chr04 | E | 4q32 | 5 | 162000000 | 3334 | nofs | nofs |
| chr04 | E | 4q32 | 5 | 162000000 | 3243 | nofs | nofs |
| chr04 | E | 4q32 | 5 | 162000000 | 2089 | nofs | nofs |
| chr04 | E | 4q32 | 5 | 163000000 | 1992 | nofs | nofs |
| chr04 | E | 4q32 | 5 | 163000000 | 2942 | nofs | nofs |
| chr04 | E | 4q32 | 5 | 163000000 | 2983 | nofs | nofs |
| chr04 | E | 4q32 | 5 | 163000000 | 2808 | nofs | nofs |
| chr04 | E | 4q32 | 5 | 164000000 | 5392 | nofs | nofs |
| chr04 | E | 4q32 | 5 | 164000000 | 3807 | nofs | nofs |
| chr04 | E | 4q32 | 5 | 164000000 | 4121 | nofs | nofs |
| chr04 | E | 4q32 | 5 | 164000000 | 3276 | nofs | nofs |
| chr04 | E | 4q32 | 5 | 165000000 | 1995 | nofs | nofs |
| chr04 | E | 4q32 | 5 | 165000000 | 1748 | nofs | nofs |
| chr04 | E | 4q32 | 5 | 165000000 | 2955 | nofs | nofs |
| chr04 | E | 4q32 | 5 | 165000000 | 3281 | nofs | nofs |
| chr04 | E | 4q32 | 5 | 166000000 | 2373 | nofs | nofs |
| chr04 | E | 4q32 | 5 | 166000000 | 1482 | nofs | nofs |

|       |   |      |   |           |       |           |      |      |
|-------|---|------|---|-----------|-------|-----------|------|------|
| chr04 | E | 4q32 | 5 | 166000000 | 4969  | 166000000 | nofs | nofs |
| chr04 | E | 4q32 | 5 | 166000000 | 4286  | 166000000 | nofs | nofs |
| chr04 | E | 4q32 | 5 | 167000000 | 1993  | 167000000 | nofs | nofs |
| chr04 | E | 4q32 | 5 | 167000000 | 2373  | 167000000 | nofs | nofs |
| chr04 | E | 4q32 | 5 | 167000000 | 2158  | 167000000 | nofs | nofs |
| chr04 | E | 4q32 | 5 | 167000000 | 1288  | 167000000 | nofs | nofs |
| chr04 | E | 4q32 | 5 | 168000000 | 2242  | 168000000 | nofs | nofs |
| chr04 | E | 4q32 | 5 | 168000000 | 2053  | 168000000 | nofs | nofs |
| chr04 | E | 4q32 | 5 | 168000000 | 2518  | 168000000 | nofs | nofs |
| chr04 | E | 4q32 | 5 | 168000000 | 2842  | 168000000 | nofs | nofs |
| chr04 | E | 4q32 | 5 | 169000000 | 6196  | 169000000 | nofs | nofs |
| chr04 | E | 4q32 | 5 | 169000000 | 2331  | 169000000 | nofs | nofs |
| chr04 | E | 4q32 | 5 | 169000000 | 3176  | 169000000 | nofs | nofs |
| chr04 | E | 4q32 | 5 | 169000000 | 2968  | 169000000 | nofs | nofs |
| chr04 | E | 4q32 | 5 | 170000000 | 3361  | 170000000 | nofs | nofs |
| chr04 | E | 4q32 | 5 | 170000000 | 3211  | 170000000 | nofs | nofs |
| chr04 | E | 4q32 | 5 | 170000000 | 2618  | 170000000 | nofs | nofs |
| chr04 | E | 4q32 | 5 | 170000000 | 3744  | 170000000 | nofs | nofs |
| chr04 | E | 4q32 | 5 | 171000000 | 2092  | 171000000 | nofs | nofs |
| chr04 | E | 4q33 | 1 | 171000000 | 3337  | 171000000 | nofs | nofs |
| chr04 | E | 4q33 | 1 | 171000000 | 12281 | 171000000 | nofs | nofs |
| chr04 | E | 4q33 | 1 | 171000000 | 3513  | 171000000 | nofs | nofs |
| chr04 | E | 4q33 | 1 | 172000000 | 2307  | 172000000 | nofs | nofs |
| chr04 | E | 4q33 | 1 | 172000000 | 2909  | 172000000 | nofs | nofs |
| chr04 | E | 4q33 | 1 | 172000000 | 2449  | 172000000 | nofs | nofs |
| chr04 | E | 4q33 | 1 | 172000000 | 2455  | 172000000 | nofs | nofs |
| chr04 | E | 4q34 | 3 | 173000000 | 3092  | 173000000 | nofs | nofs |
| chr04 | E | 4q34 | 3 | 173000000 | 3114  | 173000000 | nofs | nofs |
| chr04 | E | 4q34 | 3 | 173000000 | 1954  | 173000000 | nofs | nofs |
| chr04 | E | 4q34 | 3 | 173000000 | 2305  | 173000000 | nofs | nofs |
| chr04 | E | 4q34 | 3 | 174000000 | 2762  | 174000000 | nofs | nofs |
| chr04 | E | 4q34 | 3 | 174000000 | 2433  | 174000000 | nofs | nofs |
| chr04 | E | 4q34 | 3 | 174000000 | 2118  | 174000000 | nofs | nofs |
| chr04 | E | 4q34 | 3 | 174000000 | 3859  | 174000000 | nofs | nofs |
| chr04 | E | 4q34 | 3 | 175000000 | 3119  | 175000000 | nofs | nofs |
| chr04 | E | 4q34 | 3 | 175000000 | 4163  | 175000000 | nofs | nofs |



|       |   |      |   |           |      |      |      |
|-------|---|------|---|-----------|------|------|------|
| chr04 | E | 4q34 | 3 | 175000000 | 2976 | nofs | nofs |
| chr04 | E | 4q34 | 3 | 175000000 | 1455 | nofs | nofs |
| chr04 | E | 4q34 | 3 | 176000000 | 4132 | nofs | nofs |
| chr04 | E | 4q34 | 3 | 176000000 | 2897 | nofs | nofs |
| chr04 | E | 4q34 | 3 | 176000000 | 1925 | nofs | nofs |
| chr04 | E | 4q34 | 3 | 176000000 | 3171 | nofs | nofs |
| chr04 | E | 4q34 | 3 | 177000000 | 2889 | nofs | nofs |
| chr04 | E | 4q34 | 3 | 177000000 | 3313 | nofs | nofs |
| chr04 | E | 4q34 | 3 | 177000000 | 2951 | nofs | nofs |
| chr04 | E | 4q34 | 3 | 177000000 | 2303 | nofs | nofs |
| chr04 | E | 4q34 | 3 | 178000000 | 3000 | nofs | nofs |
| chr04 | E | 4q34 | 3 | 178000000 | 2500 | nofs | nofs |
| chr04 | E | 4q34 | 3 | 178000000 | 3576 | nofs | nofs |
| chr04 | E | 4q34 | 3 | 178000000 | 3471 | nofs | nofs |
| chr04 | E | 4q34 | 3 | 179000000 | 3074 | nofs | nofs |
| chr04 | E | 4q34 | 3 | 179000000 | 2841 | nofs | nofs |
| chr04 | E | 4q34 | 3 | 179000000 | 1980 | nofs | nofs |
| chr04 | E | 4q34 | 3 | 179000000 | 2276 | nofs | nofs |
| chr04 | E | 4q34 | 3 | 180000000 | 2359 | nofs | nofs |
| chr04 | E | 4q34 | 3 | 180000000 | 2717 | nofs | nofs |
| chr04 | E | 4q34 | 3 | 180000000 | 2437 | nofs | nofs |
| chr04 | E | 4q34 | 3 | 180000000 | 2922 | nofs | nofs |
| chr04 | E | 4q34 | 3 | 181000000 | 2851 | nofs | nofs |
| chr04 | E | 4q34 | 3 | 181000000 | 3117 | nofs | nofs |
| chr04 | E | 4q34 | 3 | 181000000 | 3394 | nofs | nofs |
| chr04 | E | 4q34 | 3 | 181000000 | 1720 | nofs | nofs |
| chr04 | E | 4q34 | 3 | 182000000 | 3963 | nofs | nofs |
| chr04 | E | 4q34 | 3 | 182000000 | 3341 | nofs | nofs |
| chr04 | E | 4q34 | 3 | 182000000 | 2944 | nofs | nofs |
| chr04 | E | 4q34 | 3 | 182000000 | 3440 | nofs | nofs |
| chr04 | E | 4q34 | 3 | 183000000 | 4387 | nofs | nofs |
| chr04 | E | 4q34 | 3 | 183000000 | 2857 | nofs | nofs |
| chr04 | E | 4q34 | 3 | 183000000 | 2820 | nofs | nofs |
| chr04 | E | 4q34 | 3 | 183000000 | 3666 | nofs | nofs |
| chr04 | E | 4q34 | 3 | 184000000 | 2010 | nofs | nofs |
| chr04 | E | 4q35 | 2 | 184000000 | 1990 | nofs | nofs |

|       |   |        |   |           |       |      |      |
|-------|---|--------|---|-----------|-------|------|------|
| chr04 | E | 4q35   | 2 | 184000000 | 6573  | nofs | nofs |
| chr04 | E | 4q35   | 2 | 184000000 | 4223  | nofs | nofs |
| chr04 | E | 4q35   | 2 | 185000000 | 3570  | nofs | nofs |
| chr04 | E | 4q35   | 2 | 185000000 | 4580  | nofs | nofs |
| chr04 | E | 4q35   | 2 | 185000000 | 8555  | nofs | nofs |
| chr04 | E | 4q35   | 2 | 185000000 | 2971  | nofs | nofs |
| chr04 | E | 4q35   | 2 | 186000000 | 5318  | nofs | nofs |
| chr04 | E | 4q35   | 2 | 186000000 | 5063  | nofs | nofs |
| chr04 | E | 4q35   | 2 | 186000000 | 4154  | nofs | nofs |
| chr04 | E | 4q35   | 2 | 186000000 | 5003  | nofs | nofs |
| chr04 | E | 4q35   | 2 | 187000000 | 4148  | nofs | nofs |
| chr04 | E | 4q35   | 2 | 187000000 | 2690  | nofs | nofs |
| chr04 | E | 4q35   | 2 | 187000000 | 4569  | nofs | nofs |
| chr04 | E | 4q35   | 2 | 187000000 | 8070  | nofs | nofs |
| chr04 | E | 4q35   | 2 | 188000000 | 13467 | nofs | nofs |
| chr04 | E | 4q35   | 2 | 188000000 | 10880 | nofs | nofs |
| chr04 | T | 4q35   | 2 | 188000000 | 4097  | nofs | nofs |
| chr04 | T | 4q35   | 2 | 188000000 | 18775 | nofs | nofs |
| chr04 | T | 4q35   | 2 | 189000000 | 4158  | nofs | nofs |
| chr04 | T | 4q35   | 2 | 189000000 | 3738  | nofs | nofs |
| chr04 | T | 4q35   | 2 | 189000000 | 5181  | nofs | nofs |
| chr04 | T | 4q35   | 2 | 189000000 | 11023 | nofs | nofs |
| chr04 | T | 4q35   | 2 | 190000000 | 12245 | nofs | nofs |
| chr04 | T | 4q35   | 2 | 190000000 | 10751 | nofs | nofs |
| chr04 | T | 4q35   | 2 | 190000000 | 8610  | nofs | nofs |
| chr04 | T | 4q35   | 2 | 190000000 | 12838 | nofs | nofs |
| chr04 | T | 4q35   | 2 | 191000000 | 14902 | nofs | nofs |
| chr04 | T | 4q35   | 2 | 191000000 | 22504 | nofs | nofs |
| chr04 | T | 4q35   | 2 | 191000000 | 16288 | nofs | nofs |
| chr05 | T | 5p15.3 | 4 | 125000    | 21633 | nofs | nofs |
| chr05 | T | 5p15.3 | 4 | 375000    | 37325 | nofs | nofs |
| chr05 | T | 5p15.3 | 4 | 625000    | 40906 | nofs | nofs |
| chr05 | T | 5p15.3 | 4 | 875000    | 20455 | nofs | nofs |
| chr05 | T | 5p15.3 | 4 | 1125000   | 36401 | nofs | nofs |
| chr05 | T | 5p15.3 | 4 | 1375000   | 31019 | nofs | nofs |
| chr05 | T | 5p15.3 | 4 | 1625000   | 27330 | nofs | nofs |

|       |   |        |   |          |       |      |      |
|-------|---|--------|---|----------|-------|------|------|
| chr05 | T | 5p15.3 | 4 | 1875000  | 11839 | nofs | nofs |
| chr05 | T | 5p15.3 | 4 | 2125000  | 14552 | nofs | nofs |
| chr05 | T | 5p15.3 | 4 | 2375000  | 12665 | nofs | nofs |
| chr05 | T | 5p15.3 | 4 | 2625000  | 10960 | nofs | nofs |
| chr05 | T | 5p15.3 | 4 | 2875000  | 8435  | nofs | nofs |
| chr05 | T | 5p15.3 | 4 | 3125000  | 5960  | nofs | nofs |
| chr05 | E | 5p15.3 | 4 | 3375000  | 10463 | nofs | nofs |
| chr05 | E | 5p15.3 | 4 | 3625000  | 9147  | nofs | nofs |
| chr05 | E | 5p15.3 | 4 | 3875000  | 8412  | nofs | nofs |
| chr05 | E | 5p15.3 | 4 | 4125000  | 6945  | nofs | nofs |
| chr05 | E | 5p15.3 | 4 | 4375000  | 3406  | nofs | nofs |
| chr05 | E | 5p15.3 | 4 | 4625000  | 4850  | nofs | nofs |
| chr05 | E | 5p15.3 | 4 | 4875000  | 5914  | nofs | nofs |
| chr05 | E | 5p15.3 | 4 | 5125000  | 3169  | nofs | nofs |
| chr05 | E | 5p15.3 | 4 | 5375000  | 3837  | nofs | nofs |
| chr05 | E | 5p15.3 | 4 | 5625000  | 3520  | nofs | nofs |
| chr05 | E | 5p15.3 | 4 | 5875000  | 4443  | nofs | nofs |
| chr05 | E | 5p15.3 | 4 | 6125000  | 5895  | nofs | nofs |
| chr05 | E | 5p15.3 | 4 | 6375000  | 6178  | nofs | nofs |
| chr05 | E | 5p15.3 | 4 | 6625000  | 6723  | nofs | nofs |
| chr05 | E | 5p15.3 | 4 | 6875000  | 3385  | nofs | nofs |
| chr05 | E | 5p15.3 | 4 | 7125000  | 3035  | nofs | nofs |
| chr05 | E | 5p15.3 | 4 | 7375000  | 6856  | nofs | nofs |
| chr05 | E | 5p15.3 | 4 | 7625000  | 2245  | nofs | nofs |
| chr05 | E | 5p15.3 | 4 | 7875000  | 3106  | nofs | nofs |
| chr05 | E | 5p15.3 | 4 | 8125000  | 3695  | nofs | nofs |
| chr05 | E | 5p15.3 | 4 | 8375000  | 2321  | nofs | nofs |
| chr05 | E | 5p15.3 | 4 | 8625000  | 3095  | nofs | nofs |
| chr05 | E | 5p15.3 | 4 | 8875000  | 3793  | nofs | nofs |
| chr05 | E | 5p15.3 | 4 | 9125000  | 2489  | nofs | nofs |
| chr05 | E | 5p15.3 | 4 | 9375000  | 3634  | nofs | nofs |
| chr05 | E | 5p15.3 | 4 | 9625000  | 2014  | nofs | nofs |
| chr05 | E | 5p15.3 | 4 | 9875000  | 3133  | nofs | nofs |
| chr05 | E | 5p15.2 | 2 | 10125000 | 2570  | nofs | nofs |
| chr05 | E | 5p15.2 | 2 | 10375000 | 4903  | nofs | nofs |
| chr05 | E | 5p15.2 | 2 | 10625000 | 7701  | nofs | nofs |

|       |   |        |   |          |      |      |           |
|-------|---|--------|---|----------|------|------|-----------|
| chr05 | E | 5p15.2 | 2 | 10875000 | 3539 | nofs | nofs      |
| chr05 | E | 5p15.2 | 2 | 11125000 | 4137 | nofs | nofs      |
| chr05 | E | 5p15.2 | 2 | 11375000 | 4103 | nofs | nofs      |
| chr05 | E | 5p15.2 | 2 | 11625000 | 3002 | nofs | nofs      |
| chr05 | E | 5p15.2 | 2 | 11875000 | 3801 | nofs | nofs      |
| chr05 | E | 5p15.2 | 2 | 12125000 | 4053 | nofs | nofs      |
| chr05 | E | 5p15.2 | 2 | 12375000 | 2563 | nofs | nofs      |
| chr05 | E | 5p15.2 | 2 | 12625000 | 2898 | nofs | nofs      |
| chr05 | E | 5p15.2 | 2 | 12875000 | 2672 | nofs | nofs      |
| chr05 | E | 5p15.2 | 2 | 13125000 | 2711 | nofs | nofs      |
| chr05 | E | 5p15.2 | 2 | 13375000 | 4565 | nofs | nofs      |
| chr05 | E | 5p15.2 | 2 | 13625000 | 2415 | nofs | nofs      |
| chr05 | E | 5p15.2 | 2 | 13875000 | 2432 | nofs | nofs      |
| chr05 | E | 5p15.2 | 2 | 14125000 | 3102 | nofs | nofs      |
| chr05 | E | 5p15.2 | 2 | 14375000 | 6260 | nofs | nofs      |
| chr05 | E | 5p15.2 | 2 | 14625000 | 4616 | nofs | nofs      |
| chr05 | E | 5p15.2 | 2 | 14875000 | 2119 | nofs | nofs      |
| chr05 | E | 5p15.2 | 2 | 15125000 | 3156 | nofs | nofs      |
| chr05 | E | 5p15.1 | 1 | 15375000 | 2864 | nofs | nofs      |
| chr05 | E | 5p15.1 | 1 | 15625000 | 2441 | nofs | nofs      |
| chr05 | E | 5p15.1 | 1 | 15875000 | 2132 | nofs | nofs      |
| chr05 | E | 5p15.1 | 1 | 16125000 | 1593 | nofs | nofs      |
| chr05 | E | 5p15.1 | 1 | 16375000 | 2312 | nofs | nofs      |
| chr05 | E | 5p15.1 | 1 | 16625000 | 3122 | nofs | nofs      |
| chr05 | E | 5p15.1 | 1 | 16875000 | 3071 | nofs | nofs      |
| chr05 | E | 5p15.1 | 1 | 17125000 | 6920 | nofs | nofs      |
| chr05 | E | 5p15.1 | 1 | 17375000 | 3846 | nofs | nofs      |
| chr05 | E | 5p15.1 | 1 | 17625000 | 1561 | nofs | nofs      |
| chr05 | E | 5p15.1 | 1 | 17875000 | 3329 | nofs | nofs      |
| chr05 | E | 5p15.1 | 1 | 18125000 | 2002 | nofs | nofs      |
| chr05 | E | 5p15.1 | 1 | 18375000 | 3631 | nofs | nofs      |
| chr05 | E | 5p15.1 | 1 | 18625000 | 2355 | nofs | nofs      |
| chr05 | B | 5p14   | . | 18875000 | 2512 | fs   | fs common |
| chr05 | B | 5p14   | . | 19125000 | 2164 | fs   | fs common |
| chr05 | B | 5p14   | . | 19375000 | 5429 | fs   | fs common |
| chr05 | B | 5p14   | . | 19625000 | 3325 | fs   | fs common |

|       |   |      |   |          |       |    |           |
|-------|---|------|---|----------|-------|----|-----------|
| chr05 | B | 5p14 | . | 19875000 | 3519  | fs | fs common |
| chr05 | B | 5p14 | . | 20125000 | 2689  | fs | fs common |
| chr05 | B | 5p14 | . | 20375000 | 2455  | fs | fs common |
| chr05 | B | 5p14 | . | 20625000 | 3453  | fs | fs common |
| chr05 | B | 5p14 | . | 20875000 | 1716  | fs | fs common |
| chr05 | B | 5p14 | . | 21125000 | 3235  | fs | fs common |
| chr05 | B | 5p14 | . | 21375000 | 3167  | fs | fs common |
| chr05 | B | 5p14 | . | 21625000 | 4106  | fs | fs common |
| chr05 | B | 5p14 | . | 21875000 | 4476  | fs | fs common |
| chr05 | B | 5p14 | . | 22125000 | 3512  | fs | fs common |
| chr05 | B | 5p14 | . | 22375000 | 3138  | fs | fs common |
| chr05 | B | 5p14 | . | 22625000 | 2327  | fs | fs common |
| chr05 | B | 5p14 | . | 22875000 | 2188  | fs | fs common |
| chr05 | B | 5p14 | . | 23125000 | 1932  | fs | fs common |
| chr05 | B | 5p14 | . | 23375000 | 2446  | fs | fs common |
| chr05 | B | 5p14 | . | 23625000 | 3995  | fs | fs common |
| chr05 | B | 5p14 | . | 23875000 | 17335 | fs | fs common |
| chr05 | B | 5p14 | . | 24125000 | 3401  | fs | fs common |
| chr05 | B | 5p14 | . | 24375000 | 3973  | fs | fs common |
| chr05 | B | 5p14 | . | 24625000 | 2091  | fs | fs common |
| chr05 | B | 5p14 | . | 24875000 | 2742  | fs | fs common |
| chr05 | B | 5p14 | . | 25125000 | 2877  | fs | fs common |
| chr05 | B | 5p14 | . | 25375000 | 3348  | fs | fs common |
| chr05 | B | 5p14 | . | 25625000 | 3747  | fs | fs common |
| chr05 | B | 5p14 | . | 25875000 | 2219  | fs | fs common |
| chr05 | B | 5p14 | . | 26125000 | 3401  | fs | fs common |
| chr05 | B | 5p14 | . | 26375000 | 7802  | fs | fs common |
| chr05 | B | 5p14 | . | 26625000 | 2105  | fs | fs common |
| chr05 | B | 5p14 | . | 26875000 | 3388  | fs | fs common |
| chr05 | B | 5p14 | . | 27125000 | 2588  | fs | fs common |
| chr05 | B | 5p14 | . | 27375000 | 3091  | fs | fs common |
| chr05 | B | 5p14 | . | 27625000 | 1686  | fs | fs common |
| chr05 | B | 5p14 | . | 27875000 | 3976  | fs | fs common |
| chr05 | B | 5p14 | . | 28125000 | 2865  | fs | fs common |
| chr05 | B | 5p14 | . | 28375000 | 4616  | fs | fs common |
| chr05 | B | 5p14 | . | 28625000 | 3266  | fs | fs common |

|       |   |      |   |          |      |    |           |
|-------|---|------|---|----------|------|----|-----------|
| chr05 | B | 5p14 | . | 28875000 | 3408 | fs | fs common |
| chr05 | B | 5p14 | . | 29125000 | 2243 | fs | fs common |
| chr05 | B | 5p14 | . | 29375000 | 3141 | fs | fs common |
| chr05 | B | 5p14 | . | 29625000 | 2068 | fs | fs common |
| chr05 | B | 5p14 | . | 29875000 | 3167 | fs | fs common |
| chr05 | B | 5p13 | . | 30125000 | 2538 | fs | fs common |
| chr05 | B | 5p13 | . | 30375000 | 2704 | fs | fs common |
| chr05 | B | 5p13 | . | 30625000 | 2019 | fs | fs common |
| chr05 | B | 5p13 | . | 30875000 | 1766 | fs | fs common |
| chr05 | B | 5p13 | . | 31125000 | 2126 | fs | fs common |
| chr05 | B | 5p13 | . | 31375000 | 2580 | fs | fs common |
| chr05 | B | 5p13 | . | 31625000 | 3115 | fs | fs common |
| chr05 | B | 5p13 | . | 31875000 | 5166 | fs | fs common |
| chr05 | B | 5p13 | . | 32125000 | 7452 | fs | fs common |
| chr05 | B | 5p13 | . | 32375000 | 2780 | fs | fs common |
| chr05 | B | 5p13 | . | 32625000 | 3729 | fs | fs common |
| chr05 | B | 5p13 | . | 32875000 | 2875 | fs | fs common |
| chr05 | B | 5p13 | . | 33125000 | 1411 | fs | fs common |
| chr05 | B | 5p13 | . | 33375000 | 2713 | fs | fs common |
| chr05 | B | 5p13 | . | 33625000 | 3958 | fs | fs common |
| chr05 | B | 5p13 | . | 33875000 | 2355 | fs | fs common |
| chr05 | B | 5p13 | . | 34125000 | 2589 | fs | fs common |
| chr05 | B | 5p13 | . | 34375000 | 4064 | fs | fs common |
| chr05 | B | 5p13 | . | 34625000 | 1859 | fs | fs common |
| chr05 | B | 5p13 | . | 34875000 | 2265 | fs | fs common |
| chr05 | B | 5p13 | . | 35125000 | 2540 | fs | fs common |
| chr05 | B | 5p13 | . | 35375000 | 1761 | fs | fs common |
| chr05 | B | 5p13 | . | 35625000 | 4254 | fs | fs common |
| chr05 | B | 5p13 | . | 35875000 | 2466 | fs | fs common |
| chr05 | B | 5p13 | . | 36125000 | 2678 | fs | fs common |
| chr05 | B | 5p13 | . | 36375000 | 1685 | fs | fs common |
| chr05 | B | 5p13 | . | 36625000 | 1501 | fs | fs common |
| chr05 | B | 5p13 | . | 36875000 | 2092 | fs | fs common |
| chr05 | B | 5p13 | . | 37125000 | 2356 | fs | fs common |
| chr05 | B | 5p13 | . | 37375000 | 4327 | fs | fs common |
| chr05 | B | 5p13 | . | 37625000 | 5217 | fs | fs common |

|       |   |      |   |          |        |      |           |
|-------|---|------|---|----------|--------|------|-----------|
| chr05 | B | 5p13 | . | 37875000 | 2110   | fs   | fs common |
| chr05 | B | 5p13 | . | 38125000 | 2721   | fs   | fs common |
| chr05 | B | 5p13 | . | 38375000 | 1933   | fs   | fs common |
| chr05 | B | 5p13 | . | 38625000 | 1944   | fs   | fs common |
| chr05 | B | 5p13 | . | 38875000 | 4680   | fs   | fs common |
| chr05 | B | 5p13 | . | 39125000 | 2115   | fs   | fs common |
| chr05 | B | 5p13 | . | 39375000 | 3220   | fs   | fs common |
| chr05 | B | 5p13 | . | 39625000 | 3803   | fs   | fs common |
| chr05 | B | 5p13 | . | 39875000 | 2467   | fs   | fs common |
| chr05 | B | 5p13 | . | 40125000 | 3074   | fs   | fs common |
| chr05 | B | 5p13 | . | 40375000 | 2188   | fs   | fs common |
| chr05 | B | 5p13 | . | 40625000 | 1915   | fs   | fs common |
| chr05 | B | 5p13 | . | 40875000 | 3668   | fs   | fs common |
| chr05 | B | 5p13 | . | 41125000 | 999    | fs   | fs common |
| chr05 | B | 5p13 | . | 41375000 | 1375   | fs   | fs common |
| chr05 | B | 5p13 | . | 41625000 | 3223   | fs   | fs common |
| chr05 | B | 5p13 | . | 41875000 | 1383   | fs   | fs common |
| chr05 | B | 5p13 | . | 42125000 | 3080   | fs   | fs common |
| chr05 | B | 5p13 | . | 42375000 | 2518   | fs   | fs common |
| chr05 | E | 5p12 | 2 | 42625000 | 3045   | nofs | nofs      |
| chr05 | E | 5p12 | 2 | 42875000 | 1761   | nofs | nofs      |
| chr05 | E | 5p12 | 2 | 43125000 | 10309  | nofs | nofs      |
| chr05 | C | 5p12 | 2 | 43375000 | 2691   | nofs | nofs      |
| chr05 | C | 5p12 | 2 | 43625000 | 3589   | nofs | nofs      |
| chr05 | C | 5p12 | 2 | 43875000 | 3399   | nofs | nofs      |
| chr05 | C | 5p12 | 2 | 44125000 | 2279   | nofs | nofs      |
| chr05 | C | 5p12 | 2 | 44375000 | 2143   | nofs | nofs      |
| chr05 | C | 5p12 | 2 | 44625000 | 2073   | nofs | nofs      |
| chr05 | C | 5p12 | 2 | 44875000 | 2977   | nofs | nofs      |
| chr05 | C | 5p11 | . | 45125000 | 2815   | nofs | nofs      |
| chr05 | C | 5p11 | . | 45375000 | 7324   | nofs | nofs      |
| chr05 | C | 5p11 | . | 45625000 | 2390   | nofs | nofs      |
| chr05 | C | 5p11 | . | 45875000 | 45029  | nofs | nofs      |
| chr05 | C | 5p11 | . | 46125000 | 176923 | nofs | nofs      |
| chr05 | C | 5p11 | . | 46375000 | 163591 | nofs | nofs      |
| chr05 | C | 5p11 | . | 46625000 | 0      | nofs | nofs      |

|       |   |   |          |       |      |      |
|-------|---|---|----------|-------|------|------|
| chr05 | C | . | 46875000 | 0     | nofs | nofs |
| chr05 | C | . | 47125000 | 0     | nofs | nofs |
| chr05 | C | . | 47375000 | 0     | nofs | nofs |
| chr05 | C | . | 47625000 | 0     | nofs | nofs |
| chr05 | C | . | 47875000 | 0     | nofs | nofs |
| chr05 | C | . | 48125000 | 0     | nofs | nofs |
| chr05 | C | . | 48375000 | 0     | nofs | nofs |
| chr05 | C | . | 48625000 | 0     | nofs | nofs |
| chr05 | C | . | 48875000 | 0     | nofs | nofs |
| chr05 | C | . | 49125000 | 0     | nofs | nofs |
| chr05 | C | . | 49375000 | 46021 | nofs | nofs |
| chr05 | C | . | 49625000 | 78032 | nofs | nofs |
| chr05 | C | . | 49875000 | 5028  | nofs | nofs |
| chr05 | C | . | 50125000 | 3376  | nofs | nofs |
| chr05 | C | . | 50375000 | 2505  | nofs | nofs |
| chr05 | C | . | 50625000 | 1931  | nofs | nofs |
| chr05 | C | 3 | 50875000 | 2988  | nofs | nofs |
| chr05 | C | 3 | 51125000 | 2366  | nofs | nofs |
| chr05 | C | 3 | 51375000 | 2236  | nofs | nofs |
| chr05 | C | 3 | 51625000 | 2563  | nofs | nofs |
| chr05 | C | 3 | 51875000 | 2075  | nofs | nofs |
| chr05 | C | 3 | 52125000 | 3850  | nofs | nofs |
| chr05 | C | 3 | 52375000 | 1449  | nofs | nofs |
| chr05 | E | 3 | 52625000 | 2231  | nofs | nofs |
| chr05 | E | 3 | 52875000 | 1948  | nofs | nofs |
| chr05 | E | 3 | 53125000 | 2521  | nofs | nofs |
| chr05 | E | 3 | 53375000 | 2175  | nofs | nofs |
| chr05 | E | 3 | 53625000 | 2318  | nofs | nofs |
| chr05 | E | 3 | 53875000 | 3536  | nofs | nofs |
| chr05 | E | 3 | 54125000 | 1577  | nofs | nofs |
| chr05 | E | 3 | 54375000 | 3002  | nofs | nofs |
| chr05 | E | 3 | 54625000 | 2057  | nofs | nofs |
| chr05 | E | 3 | 54875000 | 2831  | nofs | nofs |
| chr05 | E | 3 | 55125000 | 4366  | nofs | nofs |
| chr05 | E | 3 | 55375000 | 5073  | nofs | nofs |
| chr05 | E | 3 | 55625000 | 4069  | nofs | nofs |
| chr05 | E | 3 | 55625000 | 4069  | nofs | nofs |



|       |   |        |   |          |      |      |      |
|-------|---|--------|---|----------|------|------|------|
| chr05 | E | 5q11.2 | 3 | 55875000 | 2145 | nofs | nofs |
| chr05 | E | 5q11.2 | 3 | 56125000 | 1319 | nofs | nofs |
| chr05 | E | 5q11.2 | 3 | 56375000 | 4149 | nofs | nofs |
| chr05 | E | 5q11.2 | 3 | 56625000 | 4384 | nofs | nofs |
| chr05 | E | 5q11.2 | 3 | 56875000 | 1525 | nofs | nofs |
| chr05 | E | 5q11.2 | 3 | 57125000 | 1889 | nofs | nofs |
| chr05 | E | 5q11.2 | 3 | 57375000 | 2017 | nofs | nofs |
| chr05 | E | 5q11.2 | 3 | 57625000 | 2417 | nofs | nofs |
| chr05 | E | 5q11.2 | 3 | 57875000 | 6945 | nofs | nofs |
| chr05 | E | 5q11.2 | 3 | 58125000 | 2676 | nofs | nofs |
| chr05 | E | 5q11.2 | 3 | 58375000 | 2082 | nofs | nofs |
| chr05 | E | 5q11.2 | 3 | 58625000 | 3338 | nofs | nofs |
| chr05 | E | 5q11.2 | 3 | 58875000 | 1777 | nofs | nofs |
| chr05 | E | 5q12   | 1 | 59125000 | 3052 | nofs | nofs |
| chr05 | E | 5q12   | 1 | 59375000 | 1840 | nofs | nofs |
| chr05 | E | 5q12   | 1 | 59625000 | 2057 | nofs | nofs |
| chr05 | E | 5q12   | 1 | 59875000 | 4462 | nofs | nofs |
| chr05 | E | 5q12   | 1 | 60125000 | 2780 | nofs | nofs |
| chr05 | E | 5q12   | 1 | 60375000 | 3083 | nofs | nofs |
| chr05 | E | 5q12   | 1 | 60625000 | 3494 | nofs | nofs |
| chr05 | E | 5q12   | 1 | 60875000 | 1659 | nofs | nofs |
| chr05 | E | 5q12   | 1 | 61125000 | 2220 | nofs | nofs |
| chr05 | E | 5q12   | 1 | 61375000 | 2340 | nofs | nofs |
| chr05 | E | 5q12   | 1 | 61625000 | 3219 | nofs | nofs |
| chr05 | E | 5q12   | 1 | 61875000 | 3432 | nofs | nofs |
| chr05 | E | 5q12   | 1 | 62125000 | 1348 | nofs | nofs |
| chr05 | E | 5q12   | 1 | 62375000 | 3014 | nofs | nofs |
| chr05 | E | 5q12   | 1 | 62625000 | 1454 | nofs | nofs |
| chr05 | E | 5q12   | 1 | 62875000 | 2038 | nofs | nofs |
| chr05 | E | 5q12   | 1 | 63125000 | 1801 | nofs | nofs |
| chr05 | E | 5q12   | 1 | 63375000 | 1943 | nofs | nofs |
| chr05 | E | 5q12   | 1 | 63625000 | 2458 | nofs | nofs |
| chr05 | E | 5q12   | 1 | 63875000 | 2512 | nofs | nofs |
| chr05 | E | 5q12   | 1 | 64125000 | 2380 | nofs | nofs |
| chr05 | E | 5q12   | 1 | 64375000 | 1859 | nofs | nofs |
| chr05 | E | 5q12   | 1 | 64625000 | 3167 | nofs | nofs |

|       |   |        |   |          |      |      |      |
|-------|---|--------|---|----------|------|------|------|
| chr05 | E | 5q12   | 1 | 64875000 | 2553 | nofs | nofs |
| chr05 | E | 5q12   | 1 | 65125000 | 4086 | nofs | nofs |
| chr05 | E | 5q12   | 1 | 65375000 | 3985 | nofs | nofs |
| chr05 | E | 5q12   | 1 | 65625000 | 2511 | nofs | nofs |
| chr05 | E | 5q12   | 1 | 65875000 | 2631 | nofs | nofs |
| chr05 | E | 5q12   | 1 | 66125000 | 1877 | nofs | nofs |
| chr05 | E | 5q12   | 1 | 66375000 | 1881 | nofs | nofs |
| chr05 | E | 5q12   | 1 | 66625000 | 5210 | nofs | nofs |
| chr05 | E | 5q13.1 | 1 | 66875000 | 2010 | nofs | nofs |
| chr05 | E | 5q13.1 | 1 | 67125000 | 2278 | nofs | nofs |
| chr05 | E | 5q13.1 | 1 | 67375000 | 2660 | nofs | nofs |
| chr05 | E | 5q13.1 | 1 | 67625000 | 2948 | nofs | nofs |
| chr05 | E | 5q13.1 | 1 | 67875000 | 1367 | nofs | nofs |
| chr05 | E | 5q13.1 | 1 | 68125000 | 1863 | nofs | nofs |
| chr05 | E | 5q13.1 | 1 | 68375000 | 5908 | nofs | nofs |
| chr05 | E | 5q13.2 | 3 | 68625000 | 3438 | nofs | nofs |
| chr05 | E | 5q13.2 | 3 | 68875000 | 4379 | nofs | nofs |
| chr05 | E | 5q13.2 | 3 | 69125000 | 3387 | nofs | nofs |
| chr05 | E | 5q13.2 | 3 | 69375000 | 3100 | nofs | nofs |
| chr05 | E | 5q13.2 | 3 | 69625000 | 3625 | nofs | nofs |
| chr05 | E | 5q13.2 | 3 | 69875000 | 2916 | nofs | nofs |
| chr05 | E | 5q13.2 | 3 | 70125000 | 3039 | nofs | nofs |
| chr05 | E | 5q13.2 | 3 | 70375000 | 2750 | nofs | nofs |
| chr05 | E | 5q13.2 | 3 | 70625000 | 2853 | nofs | nofs |
| chr05 | E | 5q13.2 | 3 | 70875000 | 6154 | nofs | nofs |
| chr05 | E | 5q13.2 | 3 | 71125000 | 3340 | nofs | nofs |
| chr05 | E | 5q13.2 | 3 | 71375000 | 1702 | nofs | nofs |
| chr05 | E | 5q13.2 | 3 | 71625000 | 1841 | nofs | nofs |
| chr05 | E | 5q13.2 | 3 | 71875000 | 1977 | nofs | nofs |
| chr05 | E | 5q13.2 | 3 | 72125000 | 1498 | nofs | nofs |
| chr05 | E | 5q13.2 | 3 | 72375000 | 2510 | nofs | nofs |
| chr05 | E | 5q13.2 | 3 | 72625000 | 2109 | nofs | nofs |
| chr05 | E | 5q13.2 | 3 | 72875000 | 2611 | nofs | nofs |
| chr05 | E | 5q13.2 | 3 | 73125000 | 3055 | nofs | nofs |
| chr05 | E | 5q13.2 | 3 | 73375000 | 2181 | nofs | nofs |
| chr05 | E | 5q13.3 | 3 | 73625000 | 1959 | nofs | nofs |

|       |   |        |   |          |      |      |      |
|-------|---|--------|---|----------|------|------|------|
| chr05 | E | 5q13.3 | 3 | 73875000 | 2168 | nofs | nofs |
| chr05 | E | 5q13.3 | 3 | 74125000 | 2597 | nofs | nofs |
| chr05 | E | 5q13.3 | 3 | 74375000 | 2920 | nofs | nofs |
| chr05 | E | 5q13.3 | 3 | 74625000 | 4066 | nofs | nofs |
| chr05 | E | 5q13.3 | 3 | 74875000 | 1670 | nofs | nofs |
| chr05 | E | 5q13.3 | 3 | 75125000 | 1886 | nofs | nofs |
| chr05 | E | 5q13.3 | 3 | 75375000 | 2449 | nofs | nofs |
| chr05 | E | 5q13.3 | 3 | 75625000 | 4040 | nofs | nofs |
| chr05 | E | 5q13.3 | 3 | 75875000 | 2398 | nofs | nofs |
| chr05 | E | 5q13.3 | 3 | 76125000 | 4821 | nofs | nofs |
| chr05 | E | 5q13.3 | 3 | 76375000 | 4702 | nofs | nofs |
| chr05 | E | 5q13.3 | 3 | 76625000 | 1110 | nofs | nofs |
| chr05 | E | 5q13.3 | 3 | 76875000 | 1438 | nofs | nofs |
| chr05 | E | 5q13.3 | 3 | 77125000 | 2436 | nofs | nofs |
| chr05 | E | 5q14   | 2 | 77375000 | 3810 | nofs | nofs |
| chr05 | E | 5q14   | 2 | 77625000 | 2770 | nofs | nofs |
| chr05 | E | 5q14   | 2 | 77875000 | 2452 | nofs | nofs |
| chr05 | E | 5q14   | 2 | 78125000 | 2235 | nofs | nofs |
| chr05 | E | 5q14   | 2 | 78375000 | 3568 | nofs | nofs |
| chr05 | E | 5q14   | 2 | 78625000 | 4011 | nofs | nofs |
| chr05 | E | 5q14   | 2 | 78875000 | 3180 | nofs | nofs |
| chr05 | E | 5q14   | 2 | 79125000 | 2242 | nofs | nofs |
| chr05 | E | 5q14   | 2 | 79375000 | 1686 | nofs | nofs |
| chr05 | E | 5q14   | 2 | 79625000 | 5384 | nofs | nofs |
| chr05 | E | 5q14   | 2 | 79875000 | 3951 | nofs | nofs |
| chr05 | E | 5q14   | 2 | 80125000 | 3549 | nofs | nofs |
| chr05 | E | 5q14   | 2 | 80375000 | 3046 | nofs | nofs |
| chr05 | E | 5q14   | 2 | 80625000 | 2744 | nofs | nofs |
| chr05 | E | 5q14   | 2 | 80875000 | 2251 | nofs | nofs |
| chr05 | E | 5q14   | 2 | 81125000 | 1356 | nofs | nofs |
| chr05 | E | 5q14   | 2 | 81375000 | 4582 | nofs | nofs |
| chr05 | E | 5q14   | 2 | 81625000 | 2204 | nofs | nofs |
| chr05 | E | 5q14   | 2 | 81875000 | 3982 | nofs | nofs |
| chr05 | E | 5q14   | 2 | 82125000 | 2305 | nofs | nofs |
| chr05 | E | 5q14   | 2 | 82375000 | 2182 | nofs | nofs |
| chr05 | E | 5q14   | 2 | 82625000 | 1293 | nofs | nofs |

|       |   |      |   |          |      |      |      |
|-------|---|------|---|----------|------|------|------|
| chr05 | E | 5q14 | 2 | 82875000 | 2225 | nofs | nofs |
| chr05 | E | 5q14 | 2 | 83125000 | 2226 | nofs | nofs |
| chr05 | E | 5q14 | 2 | 83375000 | 2632 | nofs | nofs |
| chr05 | E | 5q14 | 2 | 83625000 | 3198 | nofs | nofs |
| chr05 | E | 5q14 | 2 | 83875000 | 1832 | nofs | nofs |
| chr05 | E | 5q14 | 2 | 84125000 | 4241 | nofs | nofs |
| chr05 | E | 5q14 | 2 | 84375000 | 1809 | nofs | nofs |
| chr05 | E | 5q14 | 2 | 84625000 | 2117 | nofs | nofs |
| chr05 | E | 5q14 | 2 | 84875000 | 2829 | nofs | nofs |
| chr05 | E | 5q14 | 2 | 85125000 | 2784 | nofs | nofs |
| chr05 | E | 5q14 | 2 | 85375000 | 3062 | nofs | nofs |
| chr05 | E | 5q14 | 2 | 85625000 | 3184 | nofs | nofs |
| chr05 | E | 5q14 | 2 | 85875000 | 4281 | nofs | nofs |
| chr05 | E | 5q14 | 2 | 86125000 | 1919 | nofs | nofs |
| chr05 | E | 5q14 | 2 | 86375000 | 6264 | nofs | nofs |
| chr05 | E | 5q14 | 2 | 86625000 | 4047 | nofs | nofs |
| chr05 | E | 5q14 | 2 | 86875000 | 2722 | nofs | nofs |
| chr05 | E | 5q14 | 2 | 87125000 | 1516 | nofs | nofs |
| chr05 | E | 5q14 | 2 | 87375000 | 3112 | nofs | nofs |
| chr05 | E | 5q14 | 2 | 87625000 | 1554 | nofs | nofs |
| chr05 | E | 5q14 | 2 | 87875000 | 2942 | nofs | nofs |
| chr05 | E | 5q14 | 2 | 88125000 | 1995 | nofs | nofs |
| chr05 | E | 5q14 | 2 | 88375000 | 2408 | nofs | nofs |
| chr05 | E | 5q14 | 2 | 88625000 | 3718 | nofs | nofs |
| chr05 | E | 5q14 | 2 | 88875000 | 1691 | nofs | nofs |
| chr05 | E | 5q14 | 2 | 89125000 | 1876 | nofs | nofs |
| chr05 | E | 5q14 | 2 | 89375000 | 2028 | nofs | nofs |
| chr05 | E | 5q14 | 2 | 89625000 | 1638 | nofs | nofs |
| chr05 | E | 5q14 | 2 | 89875000 | 4358 | nofs | nofs |
| chr05 | E | 5q14 | 2 | 90125000 | 2321 | nofs | nofs |
| chr05 | E | 5q14 | 2 | 90375000 | 2436 | nofs | nofs |
| chr05 | E | 5q14 | 2 | 90625000 | 2814 | nofs | nofs |
| chr05 | E | 5q14 | 2 | 90875000 | 2085 | nofs | nofs |
| chr05 | E | 5q14 | 2 | 91125000 | 1792 | nofs | nofs |
| chr05 | E | 5q14 | 2 | 91375000 | 1841 | nofs | nofs |
| chr05 | E | 5q14 | 2 | 91625000 | 2142 | nofs | nofs |

|       |   |      |   |          |       |      |      |           |
|-------|---|------|---|----------|-------|------|------|-----------|
| chr05 | E | 5q14 | 2 | 91875000 | 2129  | nofs | nofs | fs common |
| chr05 | E | 5q15 | 3 | 92125000 | 2112  | fs   | fs   | fs common |
| chr05 | E | 5q15 | 3 | 92375000 | 1127  | fs   | fs   | fs common |
| chr05 | E | 5q15 | 3 | 92625000 | 1161  | fs   | fs   | fs common |
| chr05 | E | 5q15 | 3 | 92875000 | 2762  | fs   | fs   | fs common |
| chr05 | E | 5q15 | 3 | 93125000 | 1299  | fs   | fs   | fs common |
| chr05 | E | 5q15 | 3 | 93375000 | 2894  | fs   | fs   | fs common |
| chr05 | E | 5q15 | 3 | 93625000 | 1725  | fs   | fs   | fs common |
| chr05 | E | 5q15 | 3 | 93875000 | 2398  | fs   | fs   | fs common |
| chr05 | E | 5q15 | 3 | 94125000 | 1795  | fs   | fs   | fs common |
| chr05 | E | 5q15 | 3 | 94375000 | 2101  | fs   | fs   | fs common |
| chr05 | E | 5q15 | 3 | 94625000 | 2368  | fs   | fs   | fs common |
| chr05 | E | 5q15 | 3 | 94875000 | 1418  | fs   | fs   | fs common |
| chr05 | E | 5q15 | 3 | 95125000 | 1543  | fs   | fs   | fs common |
| chr05 | E | 5q15 | 3 | 95375000 | 2347  | fs   | fs   | fs common |
| chr05 | E | 5q15 | 3 | 95625000 | 1847  | fs   | fs   | fs common |
| chr05 | E | 5q15 | 3 | 95875000 | 2369  | fs   | fs   | fs common |
| chr05 | E | 5q15 | 3 | 96125000 | 1953  | fs   | fs   | fs common |
| chr05 | E | 5q15 | 3 | 96375000 | 2347  | fs   | fs   | fs common |
| chr05 | E | 5q15 | 3 | 96625000 | 3270  | fs   | fs   | fs common |
| chr05 | E | 5q15 | 3 | 96875000 | 2479  | fs   | fs   | fs common |
| chr05 | E | 5q15 | 3 | 97125000 | 3395  | fs   | fs   | fs common |
| chr05 | E | 5q15 | 3 | 97375000 | 1934  | fs   | fs   | fs common |
| chr05 | E | 5q21 | 2 | 97625000 | 2194  | fs   | fs   | fs common |
| chr05 | E | 5q21 | 2 | 97875000 | 951   | fs   | fs   | fs common |
| chr05 | E | 5q21 | 2 | 98125000 | 1902  | fs   | fs   | fs common |
| chr05 | E | 5q21 | 2 | 98375000 | 1698  | fs   | fs   | fs common |
| chr05 | E | 5q21 | 2 | 98625000 | 35477 | fs   | fs   | fs common |
| chr05 | E | 5q21 | 2 | 98875000 | 4383  | fs   | fs   | fs common |
| chr05 | E | 5q21 | 2 | 99125000 | 3525  | fs   | fs   | fs common |
| chr05 | E | 5q21 | 2 | 99375000 | 2068  | fs   | fs   | fs common |
| chr05 | E | 5q21 | 2 | 99625000 | 3200  | fs   | fs   | fs common |
| chr05 | E | 5q21 | 2 | 99875000 | 4233  | fs   | fs   | fs common |
| chr05 | E | 5q21 | 2 | 10000000 | 2805  | fs   | fs   | fs common |
| chr05 | E | 5q21 | 2 | 10000000 | 2788  | fs   | fs   | fs common |
| chr05 | E | 5q21 | 2 | 10100000 | 2589  | fs   | fs   | fs common |

|       |   |      |   |           |      |    |           |
|-------|---|------|---|-----------|------|----|-----------|
| chr05 | E | 5q21 | 2 | 101000000 | 2926 | fs | fs common |
| chr05 | E | 5q21 | 2 | 101000000 | 1769 | fs | fs common |
| chr05 | E | 5q21 | 2 | 101000000 | 2207 | fs | fs common |
| chr05 | E | 5q21 | 2 | 102000000 | 2593 | fs | fs common |
| chr05 | E | 5q21 | 2 | 102000000 | 1761 | fs | fs common |
| chr05 | E | 5q21 | 2 | 102000000 | 2043 | fs | fs common |
| chr05 | E | 5q21 | 2 | 102000000 | 1835 | fs | fs common |
| chr05 | E | 5q21 | 2 | 103000000 | 2195 | fs | fs common |
| chr05 | E | 5q21 | 2 | 103000000 | 1743 | fs | fs common |
| chr05 | E | 5q21 | 2 | 103000000 | 2102 | fs | fs common |
| chr05 | E | 5q21 | 2 | 103000000 | 3284 | fs | fs common |
| chr05 | E | 5q21 | 2 | 104000000 | 2080 | fs | fs common |
| chr05 | E | 5q21 | 2 | 104000000 | 1805 | fs | fs common |
| chr05 | E | 5q21 | 2 | 104000000 | 4037 | fs | fs common |
| chr05 | E | 5q21 | 2 | 104000000 | 2031 | fs | fs common |
| chr05 | E | 5q21 | 2 | 105000000 | 2694 | fs | fs common |
| chr05 | E | 5q21 | 2 | 105000000 | 2053 | fs | fs common |
| chr05 | E | 5q21 | 2 | 105000000 | 3603 | fs | fs common |
| chr05 | E | 5q21 | 2 | 105000000 | 3281 | fs | fs common |
| chr05 | E | 5q21 | 2 | 106000000 | 3294 | fs | fs common |
| chr05 | E | 5q21 | 2 | 106000000 | 6545 | fs | fs common |
| chr05 | E | 5q21 | 2 | 106000000 | 2201 | fs | fs common |
| chr05 | E | 5q21 | 2 | 106000000 | 2148 | fs | fs common |
| chr05 | E | 5q21 | 2 | 107000000 | 1917 | fs | fs common |
| chr05 | E | 5q21 | 2 | 107000000 | 2381 | fs | fs common |
| chr05 | E | 5q21 | 2 | 107000000 | 1952 | fs | fs common |
| chr05 | E | 5q21 | 2 | 107000000 | 2010 | fs | fs common |
| chr05 | E | 5q21 | 2 | 108000000 | 2189 | fs | fs common |
| chr05 | E | 5q21 | 2 | 108000000 | 3382 | fs | fs common |
| chr05 | E | 5q21 | 2 | 108000000 | 2118 | fs | fs common |
| chr05 | E | 5q21 | 2 | 108000000 | 2440 | fs | fs common |
| chr05 | E | 5q21 | 2 | 109000000 | 5477 | fs | fs common |
| chr05 | E | 5q21 | 2 | 109000000 | 1821 | fs | fs common |
| chr05 | E | 5q21 | 2 | 109000000 | 1384 | fs | fs common |
| chr05 | E | 5q21 | 2 | 109000000 | 1897 | fs | fs common |
| chr05 | E | 5q21 | 2 | 110000000 | 1667 | fs | fs common |

|       |   |        |   |           |      |      |      |
|-------|---|--------|---|-----------|------|------|------|
| chr05 | E | 5q22   | 2 | 110000000 | 2139 | nofs | nofs |
| chr05 | E | 5q22   | 2 | 110000000 | 2002 | nofs | nofs |
| chr05 | E | 5q22   | 2 | 110000000 | 1517 | nofs | nofs |
| chr05 | E | 5q22   | 2 | 111000000 | 1836 | nofs | nofs |
| chr05 | E | 5q22   | 2 | 111000000 | 2031 | nofs | nofs |
| chr05 | E | 5q22   | 2 | 111000000 | 2155 | nofs | nofs |
| chr05 | E | 5q22   | 2 | 111000000 | 1824 | nofs | nofs |
| chr05 | E | 5q22   | 2 | 112000000 | 1334 | nofs | nofs |
| chr05 | E | 5q22   | 2 | 112000000 | 989  | nofs | nofs |
| chr05 | E | 5q22   | 2 | 112000000 | 1454 | nofs | nofs |
| chr05 | E | 5q22   | 2 | 112000000 | 2891 | nofs | nofs |
| chr05 | E | 5q22   | 2 | 113000000 | 1579 | nofs | nofs |
| chr05 | E | 5q22   | 2 | 113000000 | 4304 | nofs | nofs |
| chr05 | E | 5q22   | 2 | 113000000 | 1138 | nofs | nofs |
| chr05 | E | 5q22   | 2 | 113000000 | 1855 | nofs | nofs |
| chr05 | E | 5q22   | 2 | 114000000 | 2414 | nofs | nofs |
| chr05 | E | 5q22   | 2 | 114000000 | 1785 | nofs | nofs |
| chr05 | E | 5q22   | 2 | 114000000 | 1827 | nofs | nofs |
| chr05 | E | 5q22   | 2 | 114000000 | 3302 | nofs | nofs |
| chr05 | E | 5q22   | 2 | 115000000 | 2870 | nofs | nofs |
| chr05 | E | 5q22   | 2 | 115000000 | 1694 | nofs | nofs |
| chr05 | E | 5q22   | 2 | 115000000 | 1328 | nofs | nofs |
| chr05 | E | 5q22   | 2 | 115000000 | 2077 | nofs | nofs |
| chr05 | B | 5q23.1 | . | 116000000 | 2070 | nofs | nofs |
| chr05 | B | 5q23.1 | . | 116000000 | 1535 | nofs | nofs |
| chr05 | B | 5q23.1 | . | 116000000 | 2793 | nofs | nofs |
| chr05 | B | 5q23.1 | . | 116000000 | 4430 | nofs | nofs |
| chr05 | B | 5q23.1 | . | 117000000 | 2339 | nofs | nofs |
| chr05 | B | 5q23.1 | . | 117000000 | 4673 | nofs | nofs |
| chr05 | B | 5q23.1 | . | 117000000 | 2313 | nofs | nofs |
| chr05 | B | 5q23.1 | . | 117000000 | 3769 | nofs | nofs |
| chr05 | B | 5q23.1 | . | 118000000 | 1926 | nofs | nofs |
| chr05 | B | 5q23.1 | . | 118000000 | 9041 | nofs | nofs |
| chr05 | B | 5q23.1 | . | 118000000 | 2146 | nofs | nofs |
| chr05 | B | 5q23.1 | . | 118000000 | 5416 | nofs | nofs |
| chr05 | B | 5q23.1 | . | 119000000 | 2101 | nofs | nofs |

|       |   |        |   |           |      |      |      |
|-------|---|--------|---|-----------|------|------|------|
| chr05 | B | 5q23.1 | . | 119000000 | 2890 | nofs | nofs |
| chr05 | B | 5q23.1 | . | 119000000 | 2225 | nofs | nofs |
| chr05 | B | 5q23.1 | . | 119000000 | 4121 | nofs | nofs |
| chr05 | B | 5q23.1 | . | 120000000 | 2301 | nofs | nofs |
| chr05 | B | 5q23.1 | . | 120000000 | 2218 | nofs | nofs |
| chr05 | B | 5q23.1 | . | 120000000 | 2444 | nofs | nofs |
| chr05 | B | 5q23.1 | . | 120000000 | 3119 | nofs | nofs |
| chr05 | B | 5q23.1 | . | 121000000 | 1849 | nofs | nofs |
| chr05 | B | 5q23.1 | . | 121000000 | 2835 | nofs | nofs |
| chr05 | B | 5q23.1 | . | 121000000 | 1632 | nofs | nofs |
| chr05 | B | 5q23.1 | . | 121000000 | 1376 | nofs | nofs |
| chr05 | B | 5q23.1 | . | 122000000 | 1741 | nofs | nofs |
| chr05 | B | 5q23.2 | . | 122000000 | 1961 | nofs | nofs |
| chr05 | B | 5q23.2 | . | 122000000 | 3211 | nofs | nofs |
| chr05 | B | 5q23.2 | . | 122000000 | 2365 | nofs | nofs |
| chr05 | B | 5q23.2 | . | 123000000 | 1606 | nofs | nofs |
| chr05 | B | 5q23.2 | . | 123000000 | 2284 | nofs | nofs |
| chr05 | B | 5q23.2 | . | 123000000 | 2677 | nofs | nofs |
| chr05 | B | 5q23.2 | . | 123000000 | 2003 | nofs | nofs |
| chr05 | B | 5q23.2 | . | 124000000 | 2830 | nofs | nofs |
| chr05 | B | 5q23.2 | . | 124000000 | 2010 | nofs | nofs |
| chr05 | B | 5q23.2 | . | 124000000 | 2546 | nofs | nofs |
| chr05 | B | 5q23.2 | . | 124000000 | 4891 | nofs | nofs |
| chr05 | B | 5q23.2 | . | 125000000 | 2596 | nofs | nofs |
| chr05 | B | 5q23.2 | . | 125000000 | 4052 | nofs | nofs |
| chr05 | B | 5q23.2 | . | 125000000 | 2079 | nofs | nofs |
| chr05 | B | 5q23.2 | . | 125000000 | 1344 | nofs | nofs |
| chr05 | B | 5q23.2 | . | 126000000 | 2800 | nofs | nofs |
| chr05 | B | 5q23.2 | . | 126000000 | 3523 | nofs | nofs |
| chr05 | B | 5q23.2 | . | 126000000 | 7358 | nofs | nofs |
| chr05 | B | 5q23.2 | . | 126000000 | 1385 | nofs | nofs |
| chr05 | B | 5q23.2 | . | 127000000 | 2165 | nofs | nofs |
| chr05 | B | 5q23.2 | . | 127000000 | 2801 | nofs | nofs |
| chr05 | B | 5q23.2 | . | 127000000 | 1958 | nofs | nofs |
| chr05 | B | 5q23.2 | . | 127000000 | 2439 | nofs | nofs |
| chr05 | B | 5q23.2 | . | 128000000 | 1944 | nofs | nofs |



|       |   |        |   |           |       |      |           |
|-------|---|--------|---|-----------|-------|------|-----------|
| chr05 | E | 5q23.3 | 4 | 128000000 | 2539  | nofs | nofs      |
| chr05 | E | 5q23.3 | 4 | 128000000 | 1986  | nofs | nofs      |
| chr05 | E | 5q23.3 | 4 | 128000000 | 2327  | nofs | nofs      |
| chr05 | E | 5q23.3 | 4 | 129000000 | 1218  | nofs | nofs      |
| chr05 | E | 5q23.3 | 4 | 129000000 | 3082  | nofs | nofs      |
| chr05 | E | 5q23.3 | 4 | 129000000 | 1288  | nofs | nofs      |
| chr05 | E | 5q23.3 | 4 | 129000000 | 1530  | nofs | nofs      |
| chr05 | E | 5q23.3 | 4 | 130000000 | 1815  | nofs | nofs      |
| chr05 | E | 5q23.3 | 4 | 130000000 | 3025  | nofs | nofs      |
| chr05 | E | 5q23.3 | 4 | 130000000 | 2284  | nofs | nofs      |
| chr05 | E | 5q23.3 | 4 | 130000000 | 1640  | nofs | nofs      |
| chr05 | E | 5q23.3 | 4 | 131000000 | 3676  | nofs | nofs      |
| chr05 | E | 5q23.3 | 4 | 131000000 | 4067  | nofs | nofs      |
| chr05 | E | 5q23.3 | 4 | 131000000 | 2570  | nofs | nofs      |
| chr05 | E | 5q23.3 | 4 | 131000000 | 1465  | nofs | nofs      |
| chr05 | E | 5q23.3 | 4 | 132000000 | 3152  | nofs | nofs      |
| chr05 | E | 5q23.3 | 4 | 132000000 | 1710  | nofs | nofs      |
| chr05 | E | 5q23.3 | 4 | 132000000 | 2426  | nofs | nofs      |
| chr05 | E | 5q23.3 | 4 | 132000000 | 4573  | nofs | nofs      |
| chr05 | E | 5q31.1 | 2 | 133000000 | 2703  | fs   | fs common |
| chr05 | E | 5q31.1 | 2 | 133000000 | 2669  | fs   | fs common |
| chr05 | E | 5q31.1 | 2 | 133000000 | 2657  | fs   | fs common |
| chr05 | E | 5q31.1 | 2 | 133000000 | 3455  | fs   | fs common |
| chr05 | E | 5q31.1 | 2 | 134000000 | 3116  | fs   | fs common |
| chr05 | E | 5q31.1 | 2 | 134000000 | 5472  | fs   | fs common |
| chr05 | E | 5q31.1 | 2 | 134000000 | 6223  | fs   | fs common |
| chr05 | E | 5q31.1 | 2 | 134000000 | 1388  | fs   | fs common |
| chr05 | E | 5q31.1 | 2 | 135000000 | 1058  | fs   | fs common |
| chr05 | E | 5q31.1 | 2 | 135000000 | 2953  | fs   | fs common |
| chr05 | E | 5q31.1 | 2 | 135000000 | 35180 | fs   | fs common |
| chr05 | E | 5q31.1 | 2 | 135000000 | 1712  | fs   | fs common |
| chr05 | E | 5q31.1 | 2 | 136000000 | 1868  | fs   | fs common |
| chr05 | E | 5q31.1 | 2 | 136000000 | 2868  | fs   | fs common |
| chr05 | E | 5q31.1 | 2 | 136000000 | 1595  | fs   | fs common |
| chr05 | E | 5q31.1 | 2 | 136000000 | 1392  | fs   | fs common |
| chr05 | E | 5q31.1 | 2 | 137000000 | 1560  | fs   | fs common |

|       |   |        |   |           |      |      |           |
|-------|---|--------|---|-----------|------|------|-----------|
| chr05 | E | 5q31.1 | 2 | 137000000 | 3720 | fs   | fs common |
| chr05 | E | 5q31.1 | 2 | 137000000 | 1643 | fs   | fs common |
| chr05 | E | 5q31.1 | 2 | 137000000 | 4481 | fs   | fs common |
| chr05 | E | 5q31.1 | 2 | 138000000 | 6602 | fs   | fs common |
| chr05 | E | 5q31.1 | 2 | 138000000 | 2832 | fs   | fs common |
| chr05 | E | 5q31.1 | 2 | 138000000 | 4883 | fs   | fs common |
| chr05 | E | 5q31.1 | 2 | 138000000 | 2438 | fs   | fs common |
| chr05 | E | 5q31.1 | 2 | 139000000 | 4845 | fs   | fs common |
| chr05 | E | 5q31.1 | 2 | 139000000 | 7418 | fs   | fs common |
| chr05 | E | 5q31.1 | 2 | 139000000 | 4608 | fs   | fs common |
| chr05 | E | 5q31.1 | 2 | 139000000 | 2022 | fs   | fs common |
| chr05 | E | 5q31.1 | 2 | 140000000 | 2714 | fs   | fs common |
| chr05 | E | 5q31.1 | 2 | 140000000 | 3161 | fs   | fs common |
| chr05 | E | 5q31.1 | 2 | 140000000 | 1679 | fs   | fs common |
| chr05 | E | 5q31.1 | 2 | 140000000 | 1745 | fs   | fs common |
| chr05 | E | 5q31.1 | 2 | 141000000 | 1986 | fs   | fs common |
| chr05 | E | 5q31.1 | 2 | 141000000 | 1946 | fs   | fs common |
| chr05 | E | 5q31.1 | 2 | 141000000 | 2222 | fs   | fs common |
| chr05 | E | 5q31.1 | 2 | 141000000 | 3814 | fs   | fs common |
| chr05 | E | 5q31.1 | 2 | 142000000 | 4168 | fs   | fs common |
| chr05 | E | 5q31.1 | 2 | 142000000 | 3291 | fs   | fs common |
| chr05 | E | 5q31.1 | 2 | 142000000 | 1601 | fs   | fs common |
| chr05 | E | 5q31.1 | 2 | 142000000 | 2935 | fs   | fs common |
| chr05 | E | 5q31.1 | 2 | 143000000 | 2931 | fs   | fs common |
| chr05 | E | 5q31.1 | 2 | 143000000 | 2570 | fs   | fs common |
| chr05 | E | 5q31.1 | 2 | 143000000 | 1610 | fs   | fs common |
| chr05 | E | 5q31.1 | 2 | 143000000 | 2606 | fs   | fs common |
| chr05 | E | 5q31.1 | 2 | 144000000 | 2221 | fs   | fs common |
| chr05 | E | 5q31.1 | 2 | 144000000 | 3015 | fs   | fs common |
| chr05 | E | 5q31.1 | 2 | 144000000 | 2374 | fs   | fs common |
| chr05 | E | 5q31.1 | 2 | 144000000 | 1827 | fs   | fs common |
| chr05 | E | 5q32   | 4 | 145000000 | 4130 | nofs | nofs      |
| chr05 | E | 5q32   | 4 | 145000000 | 1439 | nofs | nofs      |
| chr05 | E | 5q32   | 4 | 145000000 | 4504 | nofs | nofs      |
| chr05 | E | 5q32   | 4 | 145000000 | 2221 | nofs | nofs      |
| chr05 | E | 5q32   | 4 | 146000000 | 3526 | nofs | nofs      |

|       |   |        |   |           |      |      |      |
|-------|---|--------|---|-----------|------|------|------|
| chr05 | E | 5q32   | 4 | 146000000 | 1955 | nofs | nofs |
| chr05 | E | 5q32   | 4 | 146000000 | 2465 | nofs | nofs |
| chr05 | E | 5q32   | 4 | 146000000 | 2626 | nofs | nofs |
| chr05 | E | 5q32   | 4 | 147000000 | 7185 | nofs | nofs |
| chr05 | E | 5q32   | 4 | 147000000 | 1992 | nofs | nofs |
| chr05 | E | 5q32   | 4 | 147000000 | 2868 | nofs | nofs |
| chr05 | E | 5q32   | 4 | 147000000 | 2969 | nofs | nofs |
| chr05 | E | 5q32   | 4 | 147000000 | 3344 | nofs | nofs |
| chr05 | E | 5q32   | 4 | 148000000 | 3127 | nofs | nofs |
| chr05 | E | 5q32   | 4 | 148000000 | 3627 | nofs | nofs |
| chr05 | E | 5q32   | 4 | 148000000 | 1398 | nofs | nofs |
| chr05 | E | 5q32   | 4 | 149000000 | 1806 | nofs | nofs |
| chr05 | E | 5q32   | 4 | 149000000 | 3283 | nofs | nofs |
| chr05 | E | 5q32   | 4 | 149000000 | 7662 | nofs | nofs |
| chr05 | E | 5q32   | 4 | 149000000 | 2123 | nofs | nofs |
| chr05 | E | 5q32   | 4 | 150000000 | 2103 | nofs | nofs |
| chr05 | E | 5q32   | 4 | 150000000 | 4168 | nofs | nofs |
| chr05 | E | 5q32   | 4 | 150000000 | 2002 | nofs | nofs |
| chr05 | E | 5q33.1 | 3 | 150000000 | 3914 | nofs | nofs |
| chr05 | E | 5q33.1 | 3 | 151000000 | 3863 | nofs | nofs |
| chr05 | E | 5q33.1 | 3 | 151000000 | 3690 | nofs | nofs |
| chr05 | E | 5q33.1 | 3 | 151000000 | 3587 | nofs | nofs |
| chr05 | E | 5q33.1 | 3 | 151000000 | 1337 | nofs | nofs |
| chr05 | E | 5q33.1 | 3 | 152000000 | 1506 | nofs | nofs |
| chr05 | E | 5q33.1 | 3 | 152000000 | 2958 | nofs | nofs |
| chr05 | E | 5q33.1 | 3 | 152000000 | 3434 | nofs | nofs |
| chr05 | E | 5q33.1 | 3 | 152000000 | 1122 | nofs | nofs |
| chr05 | E | 5q33.1 | 3 | 153000000 | 3239 | nofs | nofs |
| chr05 | E | 5q33.1 | 3 | 153000000 | 2452 | nofs | nofs |
| chr05 | E | 5q33.2 | 2 | 153000000 | 3383 | nofs | nofs |
| chr05 | E | 5q33.2 | 2 | 153000000 | 1606 | nofs | nofs |
| chr05 | E | 5q33.2 | 2 | 154000000 | 1916 | nofs | nofs |
| chr05 | E | 5q33.2 | 2 | 154000000 | 2842 | nofs | nofs |
| chr05 | E | 5q33.2 | 2 | 154000000 | 5543 | nofs | nofs |
| chr05 | E | 5q33.2 | 2 | 154000000 | 3395 | nofs | nofs |
| chr05 | E | 5q33.2 | 2 | 155000000 | 1995 | nofs | nofs |

|       |   |        |   |           |      |      |      |
|-------|---|--------|---|-----------|------|------|------|
| chr05 | E | 5q33.2 | 2 | 155000000 | 2009 | nofs | nofs |
| chr05 | E | 5q33.2 | 2 | 155000000 | 2122 | nofs | nofs |
| chr05 | E | 5q33.2 | 2 | 155000000 | 1781 | nofs | nofs |
| chr05 | E | 5q33.2 | 2 | 156000000 | 1183 | nofs | nofs |
| chr05 | E | 5q33.3 | 1 | 156000000 | 2654 | nofs | nofs |
| chr05 | E | 5q33.3 | 1 | 156000000 | 1738 | nofs | nofs |
| chr05 | E | 5q33.3 | 1 | 156000000 | 4962 | nofs | nofs |
| chr05 | E | 5q33.3 | 1 | 157000000 | 1460 | nofs | nofs |
| chr05 | E | 5q33.3 | 1 | 157000000 | 2736 | nofs | nofs |
| chr05 | E | 5q33.3 | 1 | 157000000 | 2873 | nofs | nofs |
| chr05 | E | 5q33.3 | 1 | 157000000 | 3584 | nofs | nofs |
| chr05 | E | 5q33.3 | 1 | 158000000 | 2314 | nofs | nofs |
| chr05 | E | 5q33.3 | 1 | 158000000 | 3975 | nofs | nofs |
| chr05 | E | 5q33.3 | 1 | 158000000 | 1525 | nofs | nofs |
| chr05 | E | 5q33.3 | 1 | 158000000 | 3075 | nofs | nofs |
| chr05 | E | 5q33.3 | 1 | 159000000 | 1899 | nofs | nofs |
| chr05 | E | 5q33.3 | 1 | 159000000 | 1637 | nofs | nofs |
| chr05 | E | 5q33.3 | 1 | 159000000 | 2395 | nofs | nofs |
| chr05 | E | 5q33.3 | 1 | 159000000 | 2962 | nofs | nofs |
| chr05 | E | 5q33.3 | 1 | 160000000 | 3852 | nofs | nofs |
| chr05 | E | 5q33.3 | 1 | 160000000 | 3574 | nofs | nofs |
| chr05 | E | 5q34   | 1 | 160000000 | 4009 | nofs | nofs |
| chr05 | E | 5q34   | 1 | 160000000 | 2582 | nofs | nofs |
| chr05 | E | 5q34   | 1 | 161000000 | 2354 | nofs | nofs |
| chr05 | E | 5q34   | 1 | 161000000 | 1781 | nofs | nofs |
| chr05 | E | 5q34   | 1 | 161000000 | 2956 | nofs | nofs |
| chr05 | E | 5q34   | 1 | 161000000 | 2685 | nofs | nofs |
| chr05 | E | 5q34   | 1 | 162000000 | 3188 | nofs | nofs |
| chr05 | E | 5q34   | 1 | 162000000 | 2214 | nofs | nofs |
| chr05 | E | 5q34   | 1 | 162000000 | 3618 | nofs | nofs |
| chr05 | E | 5q34   | 1 | 162000000 | 3856 | nofs | nofs |
| chr05 | E | 5q34   | 1 | 163000000 | 2606 | nofs | nofs |
| chr05 | E | 5q34   | 1 | 163000000 | 4050 | nofs | nofs |
| chr05 | E | 5q34   | 1 | 163000000 | 1858 | nofs | nofs |
| chr05 | E | 5q34   | 1 | 163000000 | 2364 | nofs | nofs |
| chr05 | E | 5q34   | 1 | 164000000 | 3054 | nofs | nofs |

|       |   |        |   |           |      |         |         |
|-------|---|--------|---|-----------|------|---------|---------|
| chr05 | E | 5q34   | 1 | 164000000 | 1754 | nofs    | nofs    |
| chr05 | E | 5q34   | 1 | 164000000 | 3380 | nofs    | nofs    |
| chr05 | E | 5q34   | 1 | 164000000 | 2347 | nofs    | nofs    |
| chr05 | E | 5q34   | 1 | 165000000 | 2105 | nofs    | nofs    |
| chr05 | E | 5q34   | 1 | 165000000 | 2897 | nofs    | nofs    |
| chr05 | E | 5q34   | 1 | 165000000 | 2739 | nofs    | nofs    |
| chr05 | E | 5q34   | 1 | 165000000 | 3718 | nofs    | nofs    |
| chr05 | E | 5q34   | 1 | 166000000 | 1991 | nofs    | nofs    |
| chr05 | E | 5q34   | 1 | 166000000 | 1756 | nofs    | nofs    |
| chr05 | E | 5q34   | 1 | 166000000 | 4387 | nofs    | nofs    |
| chr05 | E | 5q34   | 1 | 166000000 | 3106 | nofs    | nofs    |
| chr05 | E | 5q34   | 1 | 167000000 | 2782 | nofs    | nofs    |
| chr05 | E | 5q34   | 1 | 167000000 | 3054 | nofs    | nofs    |
| chr05 | E | 5q34   | 1 | 167000000 | 5493 | nofs    | nofs    |
| chr05 | E | 5q34   | 1 | 167000000 | 3590 | nofs    | nofs    |
| chr05 | E | 5q34   | 1 | 168000000 | 3635 | nofs    | nofs    |
| chr05 | E | 5q34   | 1 | 168000000 | 2549 | nofs    | nofs    |
| chr05 | E | 5q34   | 1 | 168000000 | 3716 | nofs    | nofs    |
| chr05 | E | 5q34   | 1 | 168000000 | 2552 | nofs    | nofs    |
| chr05 | E | 5q35.1 | 1 | 169000000 | 3373 | fs rare | fs rare |
| chr05 | E | 5q35.1 | 1 | 169000000 | 2173 | fs rare | fs rare |
| chr05 | E | 5q35.1 | 1 | 169000000 | 3524 | fs rare | fs rare |
| chr05 | E | 5q35.1 | 1 | 169000000 | 2006 | fs rare | fs rare |
| chr05 | E | 5q35.1 | 1 | 170000000 | 2824 | fs rare | fs rare |
| chr05 | E | 5q35.1 | 1 | 170000000 | 3028 | fs rare | fs rare |
| chr05 | E | 5q35.1 | 1 | 170000000 | 3526 | fs rare | fs rare |
| chr05 | E | 5q35.1 | 1 | 170000000 | 1988 | fs rare | fs rare |
| chr05 | E | 5q35.1 | 1 | 171000000 | 1510 | fs rare | fs rare |
| chr05 | E | 5q35.1 | 1 | 171000000 | 5227 | fs rare | fs rare |
| chr05 | E | 5q35.1 | 1 | 171000000 | 3623 | fs rare | fs rare |
| chr05 | E | 5q35.1 | 1 | 171000000 | 3903 | fs rare | fs rare |
| chr05 | E | 5q35.1 | 1 | 172000000 | 4695 | fs rare | fs rare |
| chr05 | E | 5q35.1 | 1 | 172000000 | 5105 | fs rare | fs rare |
| chr05 | E | 5q35.1 | 1 | 172000000 | 3861 | fs rare | fs rare |
| chr05 | E | 5q35.1 | 1 | 172000000 | 5032 | fs rare | fs rare |
| chr05 | E | 5q35.1 | 1 | 173000000 | 5225 | fs rare | fs rare |

|       |   |        |   |           |       |      |         |
|-------|---|--------|---|-----------|-------|------|---------|
| chr05 | E | 5q35.2 | 2 | 173000000 | 3593  | fs   | fs rare |
| chr05 | E | 5q35.2 | 2 | 173000000 | 3799  | fs   | fs rare |
| chr05 | E | 5q35.2 | 2 | 173000000 | 4569  | fs   | fs rare |
| chr05 | E | 5q35.2 | 2 | 174000000 | 3732  | fs   | fs rare |
| chr05 | E | 5q35.2 | 2 | 174000000 | 6095  | fs   | fs rare |
| chr05 | E | 5q35.2 | 2 | 174000000 | 4522  | fs   | fs rare |
| chr05 | E | 5q35.2 | 2 | 174000000 | 3957  | fs   | fs rare |
| chr05 | E | 5q35.2 | 2 | 175000000 | 4077  | fs   | fs rare |
| chr05 | E | 5q35.2 | 2 | 175000000 | 3605  | fs   | fs rare |
| chr05 | E | 5q35.2 | 2 | 175000000 | 1852  | fs   | fs rare |
| chr05 | E | 5q35.2 | 2 | 175000000 | 4507  | fs   | fs rare |
| chr05 | E | 5q35.2 | 2 | 176000000 | 6994  | fs   | fs rare |
| chr05 | E | 5q35.2 | 2 | 176000000 | 7016  | fs   | fs rare |
| chr05 | E | 5q35.2 | 2 | 176000000 | 8821  | fs   | fs rare |
| chr05 | E | 5q35.2 | 2 | 176000000 | 6220  | fs   | fs rare |
| chr05 | E | 5q35.3 | 4 | 177000000 | 4926  | fs   | fs rare |
| chr05 | E | 5q35.3 | 4 | 177000000 | 3456  | fs   | fs rare |
| chr05 | E | 5q35.3 | 4 | 177000000 | 5601  | fs   | fs rare |
| chr05 | E | 5q35.3 | 4 | 177000000 | 11076 | fs   | fs rare |
| chr05 | T | 5q35.3 | 4 | 178000000 | 7273  | fs   | fs rare |
| chr05 | T | 5q35.3 | 4 | 178000000 | 7430  | fs   | fs rare |
| chr05 | T | 5q35.3 | 4 | 178000000 | 2950  | fs   | fs rare |
| chr05 | T | 5q35.3 | 4 | 178000000 | 6140  | fs   | fs rare |
| chr05 | T | 5q35.3 | 4 | 179000000 | 9664  | fs   | fs rare |
| chr05 | T | 5q35.3 | 4 | 179000000 | 9947  | fs   | fs rare |
| chr05 | T | 5q35.3 | 4 | 179000000 | 8773  | fs   | fs rare |
| chr05 | T | 5q35.3 | 4 | 179000000 | 3776  | fs   | fs rare |
| chr05 | T | 5q35.3 | 4 | 180000000 | 7057  | fs   | fs rare |
| chr05 | T | 5q35.3 | 4 | 180000000 | 11807 | fs   | fs rare |
| chr05 | T | 5q35.3 | 4 | 180000000 | 6358  | fs   | fs rare |
| chr05 | T | 5q35.3 | 4 | 180000000 | 9734  | fs   | fs rare |
| chr05 | T | 5q35.3 | 4 | 181000000 | 6743  | fs   | fs rare |
| chr06 | T | 6p25   | . | 125000    | 5776  | nofs | nofs    |
| chr06 | T | 6p25   | . | 375000    | 13055 | nofs | nofs    |
| chr06 | T | 6p25   | . | 625000    | 7831  | nofs | nofs    |
| chr06 | T | 6p25   | . | 875000    | 9689  | nofs | nofs    |

|       |   |      |   |         |       |      |           |
|-------|---|------|---|---------|-------|------|-----------|
| chr06 | T | 6p25 | . | 1125000 | 6332  | nofs | nofs      |
| chr06 | T | 6p25 | . | 1375000 | 10775 | nofs | nofs      |
| chr06 | T | 6p25 | . | 1625000 | 2963  | nofs | nofs      |
| chr06 | T | 6p25 | . | 1875000 | 4138  | nofs | nofs      |
| chr06 | T | 6p25 | . | 2125000 | 3327  | nofs | nofs      |
| chr06 | T | 6p25 | . | 2375000 | 4742  | nofs | nofs      |
| chr06 | T | 6p25 | . | 2625000 | 3455  | nofs | nofs      |
| chr06 | T | 6p25 | . | 2875000 | 7759  | nofs | nofs      |
| chr06 | T | 6p25 | . | 3125000 | 8943  | nofs | nofs      |
| chr06 | B | 6p25 | . | 3375000 | 3764  | nofs | nofs      |
| chr06 | B | 6p25 | . | 3625000 | 3833  | nofs | nofs      |
| chr06 | B | 6p25 | . | 3875000 | 2477  | nofs | nofs      |
| chr06 | B | 6p25 | . | 4125000 | 3852  | fs   | fs common |
| chr06 | B | 6p25 | . | 4375000 | 2418  | fs   | fs common |
| chr06 | B | 6p25 | . | 4625000 | 2762  | fs   | fs common |
| chr06 | B | 6p25 | . | 4875000 | 6971  | fs   | fs common |
| chr06 | B | 6p25 | . | 5125000 | 2731  | fs   | fs common |
| chr06 | B | 6p25 | . | 5375000 | 2078  | fs   | fs common |
| chr06 | B | 6p25 | . | 5625000 | 2211  | fs   | fs common |
| chr06 | B | 6p25 | . | 5875000 | 4657  | fs   | fs common |
| chr06 | B | 6p25 | . | 6125000 | 2700  | fs   | fs common |
| chr06 | B | 6p25 | . | 6375000 | 2560  | fs   | fs common |
| chr06 | B | 6p25 | . | 6625000 | 4906  | fs   | fs common |
| chr06 | B | 6p25 | . | 6875000 | 3406  | fs   | fs common |
| chr06 | B | 6p25 | . | 7125000 | 4384  | fs   | fs common |
| chr06 | B | 6p24 | . | 7375000 | 4220  | nofs | nofs      |
| chr06 | B | 6p24 | . | 7625000 | 2124  | nofs | nofs      |
| chr06 | B | 6p24 | . | 7875000 | 1892  | nofs | nofs      |
| chr06 | B | 6p24 | . | 8125000 | 3600  | nofs | nofs      |
| chr06 | B | 6p24 | . | 8375000 | 1594  | nofs | nofs      |
| chr06 | B | 6p24 | . | 8625000 | 3994  | nofs | nofs      |
| chr06 | B | 6p24 | . | 8875000 | 3582  | nofs | nofs      |
| chr06 | B | 6p24 | . | 9125000 | 2730  | nofs | nofs      |
| chr06 | B | 6p24 | . | 9375000 | 2368  | nofs | nofs      |
| chr06 | B | 6p24 | . | 9625000 | 2400  | nofs | nofs      |
| chr06 | B | 6p24 | . | 9875000 | 3602  | nofs | nofs      |

|       |   |        |   |          |      |         |         |
|-------|---|--------|---|----------|------|---------|---------|
| chr06 | B | 6p24   | . | 10125000 | 2387 | nofs    | nofs    |
| chr06 | B | 6p24   | . | 10375000 | 4471 | nofs    | nofs    |
| chr06 | B | 6p24   | . | 10625000 | 5431 | nofs    | nofs    |
| chr06 | B | 6p24   | . | 10875000 | 4934 | nofs    | nofs    |
| chr06 | B | 6p24   | . | 11125000 | 2389 | nofs    | nofs    |
| chr06 | B | 6p24   | . | 11375000 | 3243 | nofs    | nofs    |
| chr06 | B | 6p24   | . | 11625000 | 3242 | nofs    | nofs    |
| chr06 | B | 6p24   | . | 11875000 | 2288 | nofs    | nofs    |
| chr06 | B | 6p24   | . | 12125000 | 3764 | nofs    | nofs    |
| chr06 | B | 6p24   | . | 12375000 | 3917 | nofs    | nofs    |
| chr06 | B | 6p24   | . | 12625000 | 2151 | nofs    | nofs    |
| chr06 | B | 6p24   | . | 12875000 | 3631 | nofs    | nofs    |
| chr06 | B | 6p24   | . | 13125000 | 2853 | nofs    | nofs    |
| chr06 | B | 6p24   | . | 13375000 | 2383 | nofs    | nofs    |
| chr06 | B | 6p23   | . | 13625000 | 4761 | fs rare | fs rare |
| chr06 | B | 6p23   | . | 13875000 | 5177 | fs rare | fs rare |
| chr06 | B | 6p23   | . | 14125000 | 3779 | fs rare | fs rare |
| chr06 | B | 6p23   | . | 14375000 | 2819 | fs rare | fs rare |
| chr06 | B | 6p23   | . | 14625000 | 2108 | fs rare | fs rare |
| chr06 | B | 6p23   | . | 14875000 | 2662 | fs rare | fs rare |
| chr06 | B | 6p23   | . | 15125000 | 4454 | fs rare | fs rare |
| chr06 | B | 6p23   | . | 15375000 | 6211 | fs rare | fs rare |
| chr06 | E | 6p22.3 | 3 | 15625000 | 2697 | nofs    | nofs    |
| chr06 | E | 6p22.3 | 3 | 15875000 | 2729 | nofs    | nofs    |
| chr06 | E | 6p22.3 | 3 | 16125000 | 3479 | nofs    | nofs    |
| chr06 | E | 6p22.3 | 3 | 16375000 | 5211 | nofs    | nofs    |
| chr06 | E | 6p22.3 | 3 | 16625000 | 2436 | nofs    | nofs    |
| chr06 | E | 6p22.3 | 3 | 16875000 | 2249 | nofs    | nofs    |
| chr06 | E | 6p22.3 | 3 | 17125000 | 2794 | nofs    | nofs    |
| chr06 | E | 6p22.3 | 3 | 17375000 | 2966 | nofs    | nofs    |
| chr06 | E | 6p22.3 | 3 | 17625000 | 3433 | nofs    | nofs    |
| chr06 | E | 6p22.3 | 3 | 17875000 | 5805 | nofs    | nofs    |
| chr06 | E | 6p22.3 | 3 | 18125000 | 4053 | nofs    | nofs    |
| chr06 | E | 6p22.3 | 3 | 18375000 | 3082 | nofs    | nofs    |
| chr06 | E | 6p22.3 | 3 | 18625000 | 3160 | nofs    | nofs    |
| chr06 | E | 6p22.3 | 3 | 18875000 | 5471 | nofs    | nofs    |



|       |   |        |   |          |      |           |           |
|-------|---|--------|---|----------|------|-----------|-----------|
| chr06 | E | 6p22.3 | 3 | 19125000 | 2387 | nofs      | nofs      |
| chr06 | E | 6p22.3 | 3 | 19375000 | 3155 | nofs      | nofs      |
| chr06 | E | 6p22.3 | 3 | 19625000 | 2665 | nofs      | nofs      |
| chr06 | E | 6p22.3 | 3 | 19875000 | 2358 | nofs      | nofs      |
| chr06 | E | 6p22.3 | 3 | 20125000 | 4153 | nofs      | nofs      |
| chr06 | E | 6p22.3 | 3 | 20375000 | 4782 | nofs      | nofs      |
| chr06 | E | 6p22.3 | 3 | 20625000 | 3202 | nofs      | nofs      |
| chr06 | E | 6p22.3 | 3 | 20875000 | 2335 | nofs      | nofs      |
| chr06 | E | 6p22.3 | 3 | 21125000 | 1478 | nofs      | nofs      |
| chr06 | E | 6p22.3 | 3 | 21375000 | 2284 | nofs      | nofs      |
| chr06 | E | 6p22.3 | 3 | 21625000 | 4140 | nofs      | nofs      |
| chr06 | E | 6p22.3 | 3 | 21875000 | 5703 | nofs      | nofs      |
| chr06 | E | 6p22.3 | 3 | 22125000 | 4891 | nofs      | nofs      |
| chr06 | E | 6p22.3 | 3 | 22375000 | 2828 | nofs      | nofs      |
| chr06 | E | 6p22.3 | 3 | 22625000 | 2755 | nofs      | nofs      |
| chr06 | E | 6p22.3 | 3 | 22875000 | 3644 | nofs      | nofs      |
| chr06 | E | 6p22.3 | 3 | 23125000 | 2273 | nofs      | nofs      |
| chr06 | E | 6p22.3 | 3 | 23375000 | 3653 | nofs      | nofs      |
| chr06 | E | 6p22.3 | 3 | 23625000 | 3033 | nofs      | nofs      |
| chr06 | E | 6p22.3 | 3 | 23875000 | 3477 | nofs      | nofs      |
| chr06 | E | 6p22.2 | 1 | 24125000 | 3330 | fs common | fs common |
| chr06 | E | 6p22.2 | 1 | 24375000 | 4011 | fs common | fs common |
| chr06 | E | 6p22.2 | 1 | 24625000 | 2521 | fs common | fs common |
| chr06 | E | 6p22.2 | 1 | 24875000 | 2367 | fs common | fs common |
| chr06 | E | 6p22.2 | 1 | 25125000 | 2305 | fs common | fs common |
| chr06 | E | 6p22.2 | 1 | 25375000 | 2619 | fs common | fs common |
| chr06 | E | 6p22.2 | 1 | 25625000 | 2240 | fs common | fs common |
| chr06 | E | 6p22.2 | 1 | 25875000 | 1983 | fs common | fs common |
| chr06 | E | 6p22.2 | 1 | 26125000 | 2776 | fs common | fs common |
| chr06 | E | 6p22.2 | 1 | 26375000 | 2628 | fs common | fs common |
| chr06 | E | 6p22.1 | 4 | 26625000 | 1651 | nofs      | nofs      |
| chr06 | E | 6p22.1 | 4 | 26875000 | 4212 | nofs      | nofs      |
| chr06 | E | 6p22.1 | 4 | 27125000 | 4706 | nofs      | nofs      |
| chr06 | E | 6p22.1 | 4 | 27375000 | 4104 | nofs      | nofs      |
| chr06 | E | 6p22.1 | 4 | 27625000 | 7826 | nofs      | nofs      |
| chr06 | E | 6p22.1 | 4 | 27875000 | 4955 | nofs      | nofs      |

|       |   |        |   |          |       |      |      |
|-------|---|--------|---|----------|-------|------|------|
| chr06 | E | 6p22.1 | 4 | 28125000 | 4237  | nofs | nofs |
| chr06 | E | 6p22.1 | 4 | 28375000 | 3341  | nofs | nofs |
| chr06 | E | 6p22.1 | 4 | 28625000 | 3951  | nofs | nofs |
| chr06 | E | 6p22.1 | 4 | 28875000 | 4269  | nofs | nofs |
| chr06 | E | 6p22.1 | 4 | 29125000 | 4434  | nofs | nofs |
| chr06 | E | 6p22.1 | 4 | 29375000 | 1536  | nofs | nofs |
| chr06 | E | 6p22.1 | 4 | 29625000 | 1531  | nofs | nofs |
| chr06 | E | 6p22.1 | 4 | 29875000 | 5047  | nofs | nofs |
| chr06 | E | 6p21.3 | 5 | 30125000 | 3096  | nofs | nofs |
| chr06 | E | 6p21.3 | 5 | 30375000 | 2811  | nofs | nofs |
| chr06 | E | 6p21.3 | 5 | 30625000 | 4755  | nofs | nofs |
| chr06 | E | 6p21.3 | 5 | 30875000 | 5298  | nofs | nofs |
| chr06 | E | 6p21.3 | 5 | 31125000 | 16075 | nofs | nofs |
| chr06 | E | 6p21.3 | 5 | 31375000 | 2260  | nofs | nofs |
| chr06 | E | 6p21.3 | 5 | 31625000 | 7233  | nofs | nofs |
| chr06 | E | 6p21.3 | 5 | 31875000 | 4566  | nofs | nofs |
| chr06 | E | 6p21.3 | 5 | 32125000 | 4296  | nofs | nofs |
| chr06 | E | 6p21.3 | 5 | 32375000 | 4014  | nofs | nofs |
| chr06 | E | 6p21.3 | 5 | 32625000 | 6068  | nofs | nofs |
| chr06 | E | 6p21.3 | 5 | 32875000 | 1787  | nofs | nofs |
| chr06 | E | 6p21.3 | 5 | 33125000 | 3045  | nofs | nofs |
| chr06 | E | 6p21.3 | 5 | 33375000 | 5854  | nofs | nofs |
| chr06 | E | 6p21.3 | 5 | 33625000 | 5407  | nofs | nofs |
| chr06 | E | 6p21.3 | 5 | 33875000 | 2652  | nofs | nofs |
| chr06 | E | 6p21.3 | 5 | 34125000 | 6915  | nofs | nofs |
| chr06 | E | 6p21.3 | 5 | 34375000 | 6604  | nofs | nofs |
| chr06 | E | 6p21.3 | 5 | 34625000 | 3019  | nofs | nofs |
| chr06 | E | 6p21.3 | 5 | 34875000 | 3190  | nofs | nofs |
| chr06 | E | 6p21.3 | 5 | 35125000 | 2269  | nofs | nofs |
| chr06 | E | 6p21.3 | 5 | 35375000 | 5228  | nofs | nofs |
| chr06 | E | 6p21.3 | 5 | 35625000 | 1966  | nofs | nofs |
| chr06 | E | 6p21.3 | 5 | 35875000 | 3463  | nofs | nofs |
| chr06 | E | 6p21.3 | 5 | 36125000 | 2285  | nofs | nofs |
| chr06 | E | 6p21.3 | 5 | 36375000 | 3200  | nofs | nofs |
| chr06 | E | 6p21.3 | 5 | 36625000 | 6072  | nofs | nofs |
| chr06 | E | 6p21.3 | 5 | 36875000 | 2881  | nofs | nofs |

|       |   |        |   |          |      |      |      |
|-------|---|--------|---|----------|------|------|------|
| chr06 | E | 6p21.2 | 4 | 37125000 | 5179 | nofs | nofs |
| chr06 | E | 6p21.2 | 4 | 37375000 | 3880 | nofs | nofs |
| chr06 | E | 6p21.2 | 4 | 37625000 | 2613 | nofs | nofs |
| chr06 | E | 6p21.2 | 4 | 37875000 | 2813 | nofs | nofs |
| chr06 | E | 6p21.2 | 4 | 38125000 | 3120 | nofs | nofs |
| chr06 | E | 6p21.2 | 4 | 38375000 | 1457 | nofs | nofs |
| chr06 | E | 6p21.2 | 4 | 38625000 | 1822 | nofs | nofs |
| chr06 | E | 6p21.2 | 4 | 38875000 | 2914 | nofs | nofs |
| chr06 | E | 6p21.2 | 4 | 39125000 | 2840 | nofs | nofs |
| chr06 | E | 6p21.2 | 4 | 39375000 | 2843 | nofs | nofs |
| chr06 | E | 6p21.2 | 4 | 39625000 | 1902 | nofs | nofs |
| chr06 | E | 6p21.2 | 4 | 39875000 | 2884 | nofs | nofs |
| chr06 | E | 6p21.2 | 4 | 40125000 | 981  | nofs | nofs |
| chr06 | E | 6p21.2 | 4 | 40375000 | 3095 | nofs | nofs |
| chr06 | E | 6p21.2 | 4 | 40625000 | 4732 | nofs | nofs |
| chr06 | E | 6p21.2 | 4 | 40875000 | 2864 | nofs | nofs |
| chr06 | E | 6p21.1 | 1 | 41125000 | 1573 | nofs | nofs |
| chr06 | E | 6p21.1 | 1 | 41375000 | 2530 | nofs | nofs |
| chr06 | E | 6p21.1 | 1 | 41625000 | 3523 | nofs | nofs |
| chr06 | E | 6p21.1 | 1 | 41875000 | 5261 | nofs | nofs |
| chr06 | E | 6p21.1 | 1 | 42125000 | 4184 | nofs | nofs |
| chr06 | E | 6p21.1 | 1 | 42375000 | 2679 | nofs | nofs |
| chr06 | E | 6p21.1 | 1 | 42625000 | 4772 | nofs | nofs |
| chr06 | E | 6p21.1 | 1 | 42875000 | 5514 | nofs | nofs |
| chr06 | E | 6p21.1 | 1 | 43125000 | 4300 | nofs | nofs |
| chr06 | E | 6p21.1 | 1 | 43375000 | 4090 | nofs | nofs |
| chr06 | E | 6p21.1 | 1 | 43625000 | 5450 | nofs | nofs |
| chr06 | E | 6p21.1 | 1 | 43875000 | 4389 | nofs | nofs |
| chr06 | E | 6p21.1 | 1 | 44125000 | 4977 | nofs | nofs |
| chr06 | E | 6p21.1 | 1 | 44375000 | 3081 | nofs | nofs |
| chr06 | E | 6p21.1 | 1 | 44625000 | 2642 | nofs | nofs |
| chr06 | E | 6p21.1 | 1 | 44875000 | 2771 | nofs | nofs |
| chr06 | E | 6p21.1 | 1 | 45125000 | 2133 | nofs | nofs |
| chr06 | E | 6p21.1 | 1 | 45375000 | 2547 | nofs | nofs |
| chr06 | E | 6p21.1 | 1 | 45625000 | 2168 | nofs | nofs |
| chr06 | E | 6p21.1 | 1 | 45875000 | 2672 | nofs | nofs |

|       |   |        |   |          |      |      |      |
|-------|---|--------|---|----------|------|------|------|
| chr06 | E | 6p21.1 | 1 | 46125000 | 2237 | nofs | nofs |
| chr06 | E | 6p12   | 4 | 46375000 | 1806 | nofs | nofs |
| chr06 | E | 6p12   | 4 | 46625000 | 3452 | nofs | nofs |
| chr06 | E | 6p12   | 4 | 46875000 | 4354 | nofs | nofs |
| chr06 | E | 6p12   | 4 | 47125000 | 3214 | nofs | nofs |
| chr06 | E | 6p12   | 4 | 47375000 | 2032 | nofs | nofs |
| chr06 | E | 6p12   | 4 | 47625000 | 3696 | nofs | nofs |
| chr06 | E | 6p12   | 4 | 47875000 | 1996 | nofs | nofs |
| chr06 | E | 6p12   | 4 | 48125000 | 1874 | nofs | nofs |
| chr06 | E | 6p12   | 4 | 48375000 | 3064 | nofs | nofs |
| chr06 | E | 6p12   | 4 | 48625000 | 2961 | nofs | nofs |
| chr06 | E | 6p12   | 4 | 48875000 | 4691 | nofs | nofs |
| chr06 | E | 6p12   | 4 | 49125000 | 4673 | nofs | nofs |
| chr06 | E | 6p12   | 4 | 49375000 | 2264 | nofs | nofs |
| chr06 | E | 6p12   | 4 | 49625000 | 3240 | nofs | nofs |
| chr06 | E | 6p12   | 4 | 49875000 | 3557 | nofs | nofs |
| chr06 | E | 6p12   | 4 | 50125000 | 2170 | nofs | nofs |
| chr06 | E | 6p12   | 4 | 50375000 | 1977 | nofs | nofs |
| chr06 | E | 6p12   | 4 | 50625000 | 2077 | nofs | nofs |
| chr06 | E | 6p12   | 4 | 50875000 | 4034 | nofs | nofs |
| chr06 | E | 6p12   | 4 | 51125000 | 2046 | nofs | nofs |
| chr06 | E | 6p12   | 4 | 51375000 | 2991 | nofs | nofs |
| chr06 | E | 6p12   | 4 | 51625000 | 2617 | nofs | nofs |
| chr06 | E | 6p12   | 4 | 51875000 | 2359 | nofs | nofs |
| chr06 | E | 6p12   | 4 | 52125000 | 2193 | nofs | nofs |
| chr06 | E | 6p12   | 4 | 52375000 | 2127 | nofs | nofs |
| chr06 | E | 6p12   | 4 | 52625000 | 3343 | nofs | nofs |
| chr06 | E | 6p12   | 4 | 52875000 | 3937 | nofs | nofs |
| chr06 | E | 6p12   | 4 | 53125000 | 3002 | nofs | nofs |
| chr06 | E | 6p12   | 4 | 53375000 | 2983 | nofs | nofs |
| chr06 | E | 6p12   | 4 | 53625000 | 3125 | nofs | nofs |
| chr06 | E | 6p12   | 4 | 53875000 | 1136 | nofs | nofs |
| chr06 | E | 6p12   | 4 | 54125000 | 2474 | nofs | nofs |
| chr06 | E | 6p12   | 4 | 54375000 | 2806 | nofs | nofs |
| chr06 | E | 6p12   | 4 | 54625000 | 2512 | nofs | nofs |
| chr06 | E | 6p12   | 4 | 54875000 | 2625 | nofs | nofs |

|       |   |        |   |          |       |      |      |
|-------|---|--------|---|----------|-------|------|------|
| chr06 | E | 6p12   | 4 | 55125000 | 3080  | nofs | nofs |
| chr06 | E | 6p12   | 4 | 55375000 | 1979  | nofs | nofs |
| chr06 | E | 6p12   | 4 | 55625000 | 2915  | nofs | nofs |
| chr06 | C | 6p12   | 4 | 55875000 | 3876  | nofs | nofs |
| chr06 | C | 6p12   | 4 | 56125000 | 3082  | nofs | nofs |
| chr06 | C | 6p12   | 4 | 56375000 | 1890  | nofs | nofs |
| chr06 | C | 6p12   | 4 | 56625000 | 1672  | nofs | nofs |
| chr06 | C | 6p12   | 4 | 56875000 | 3939  | nofs | nofs |
| chr06 | C | 6p12   | 4 | 57125000 | 1945  | nofs | nofs |
| chr06 | C | 6p12   | 4 | 57375000 | 2360  | nofs | nofs |
| chr06 | C | 6p11.2 | 2 | 57625000 | 3112  | nofs | nofs |
| chr06 | C | 6p11.2 | 2 | 57875000 | 1188  | nofs | nofs |
| chr06 | C | 6p11.2 | 2 | 58125000 | 31122 | nofs | nofs |
| chr06 | C | 6p11.2 | 2 | 58375000 | 3216  | nofs | nofs |
| chr06 | C | 6p11.2 | 2 | 58625000 | 16154 | nofs | nofs |
| chr06 | C | 6p11.2 | 2 | 58875000 | 38012 | nofs | nofs |
| chr06 | C |        | . | 59125000 | 0     | nofs | nofs |
| chr06 | C |        | . | 59375000 | 0     | nofs | nofs |
| chr06 | C |        | . | 59625000 | 0     | nofs | nofs |
| chr06 | C |        | . | 59875000 | 0     | nofs | nofs |
| chr06 | C |        | . | 60125000 | 0     | nofs | nofs |
| chr06 | C |        | . | 60375000 | 0     | nofs | nofs |
| chr06 | C |        | . | 60625000 | 0     | nofs | nofs |
| chr06 | C |        | . | 60875000 | 0     | nofs | nofs |
| chr06 | C |        | . | 61125000 | 0     | nofs | nofs |
| chr06 | C |        | . | 61375000 | 0     | nofs | nofs |
| chr06 | C |        | . | 61625000 | 0     | nofs | nofs |
| chr06 | C | 6q11   | . | 61875000 | 60521 | nofs | nofs |
| chr06 | C | 6q11   | . | 62125000 | 21126 | nofs | nofs |
| chr06 | C | 6q11   | . | 62375000 | 38423 | nofs | nofs |
| chr06 | C | 6q11   | . | 62625000 | 3672  | nofs | nofs |
| chr06 | C | 6q11   | . | 62875000 | 1729  | nofs | nofs |
| chr06 | C | 6q11   | . | 63125000 | 2053  | nofs | nofs |
| chr06 | C | 6q12   | 2 | 63375000 | 2638  | nofs | nofs |
| chr06 | C | 6q12   | 2 | 63625000 | 22524 | nofs | nofs |
| chr06 | C | 6q12   | 2 | 63875000 | 3550  | nofs | nofs |

|       |   |      |   |          |      |           |           |
|-------|---|------|---|----------|------|-----------|-----------|
| chr06 | C | 6q12 | 2 | 64125000 | 4437 | nofs      | nofs      |
| chr06 | C | 6q12 | 2 | 64375000 | 2680 | nofs      | nofs      |
| chr06 | C | 6q12 | 2 | 64625000 | 1090 | nofs      | nofs      |
| chr06 | C | 6q12 | 2 | 64875000 | 1980 | nofs      | nofs      |
| chr06 | E | 6q12 | 2 | 65125000 | 2349 | nofs      | nofs      |
| chr06 | E | 6q12 | 2 | 65375000 | 2098 | nofs      | nofs      |
| chr06 | E | 6q12 | 2 | 65625000 | 1584 | nofs      | nofs      |
| chr06 | E | 6q12 | 2 | 65875000 | 2726 | nofs      | nofs      |
| chr06 | E | 6q12 | 2 | 66125000 | 3267 | nofs      | nofs      |
| chr06 | E | 6q12 | 2 | 66375000 | 3498 | nofs      | nofs      |
| chr06 | E | 6q12 | 2 | 66625000 | 2659 | nofs      | nofs      |
| chr06 | E | 6q12 | 2 | 66875000 | 2354 | nofs      | nofs      |
| chr06 | E | 6q12 | 2 | 67125000 | 2861 | nofs      | nofs      |
| chr06 | E | 6q12 | 2 | 67375000 | 2647 | nofs      | nofs      |
| chr06 | E | 6q12 | 2 | 67625000 | 2738 | nofs      | nofs      |
| chr06 | E | 6q12 | 2 | 67875000 | 4971 | nofs      | nofs      |
| chr06 | E | 6q12 | 2 | 68125000 | 3814 | nofs      | nofs      |
| chr06 | E | 6q12 | 2 | 68375000 | 3370 | nofs      | nofs      |
| chr06 | E | 6q12 | 2 | 68625000 | 3627 | nofs      | nofs      |
| chr06 | E | 6q12 | 2 | 68875000 | 3032 | nofs      | nofs      |
| chr06 | E | 6q12 | 2 | 69125000 | 1362 | nofs      | nofs      |
| chr06 | E | 6q12 | 2 | 69375000 | 2369 | nofs      | nofs      |
| chr06 | E | 6q12 | 2 | 69625000 | 2761 | nofs      | nofs      |
| chr06 | E | 6q12 | 2 | 69875000 | 3722 | nofs      | nofs      |
| chr06 | E | 6q12 | 2 | 70125000 | 3555 | nofs      | nofs      |
| chr06 | E | 6q13 | 3 | 70375000 | 2398 | fs common | fs common |
| chr06 | E | 6q13 | 3 | 70625000 | 3066 | fs common | fs common |
| chr06 | E | 6q13 | 3 | 70875000 | 1445 | fs common | fs common |
| chr06 | E | 6q13 | 3 | 71125000 | 1595 | fs common | fs common |
| chr06 | E | 6q13 | 3 | 71375000 | 2052 | fs common | fs common |
| chr06 | E | 6q13 | 3 | 71625000 | 1932 | fs common | fs common |
| chr06 | E | 6q13 | 3 | 71875000 | 3091 | fs common | fs common |
| chr06 | E | 6q13 | 3 | 72125000 | 3970 | fs common | fs common |
| chr06 | E | 6q13 | 3 | 72375000 | 2631 | fs common | fs common |
| chr06 | E | 6q13 | 3 | 72625000 | 2454 | fs common | fs common |
| chr06 | E | 6q13 | 3 | 72875000 | 2238 | fs common | fs common |

|       |   |      |   |          |      |      |           |
|-------|---|------|---|----------|------|------|-----------|
| chr06 | E | 6q13 | 3 | 73125000 | 2507 | fs   | fs common |
| chr06 | E | 6q13 | 3 | 73375000 | 2673 | fs   | fs common |
| chr06 | E | 6q13 | 3 | 73625000 | 2550 | fs   | fs common |
| chr06 | E | 6q13 | 3 | 73875000 | 3028 | fs   | fs common |
| chr06 | E | 6q13 | 3 | 74125000 | 4291 | fs   | fs common |
| chr06 | E | 6q13 | 3 | 74375000 | 6435 | fs   | fs common |
| chr06 | E | 6q13 | 3 | 74625000 | 2752 | fs   | fs common |
| chr06 | E | 6q13 | 3 | 74875000 | 3028 | fs   | fs common |
| chr06 | E | 6q13 | 3 | 75125000 | 2176 | fs   | fs common |
| chr06 | E | 6q13 | 3 | 75375000 | 2165 | fs   | fs common |
| chr06 | E | 6q13 | 3 | 75625000 | 2316 | fs   | fs common |
| chr06 | E | 6q13 | 3 | 75875000 | 2138 | fs   | fs common |
| chr06 | E | 6q14 | 3 | 76125000 | 2708 | nofs | nofs      |
| chr06 | E | 6q14 | 3 | 76375000 | 2653 | nofs | nofs      |
| chr06 | E | 6q14 | 3 | 76625000 | 2589 | nofs | nofs      |
| chr06 | E | 6q14 | 3 | 76875000 | 1716 | nofs | nofs      |
| chr06 | E | 6q14 | 3 | 77125000 | 1532 | nofs | nofs      |
| chr06 | E | 6q14 | 3 | 77375000 | 2376 | nofs | nofs      |
| chr06 | E | 6q14 | 3 | 77625000 | 2553 | nofs | nofs      |
| chr06 | E | 6q14 | 3 | 77875000 | 2096 | nofs | nofs      |
| chr06 | E | 6q14 | 3 | 78125000 | 1876 | nofs | nofs      |
| chr06 | E | 6q14 | 3 | 78375000 | 5021 | nofs | nofs      |
| chr06 | E | 6q14 | 3 | 78625000 | 1609 | nofs | nofs      |
| chr06 | E | 6q14 | 3 | 78875000 | 2391 | nofs | nofs      |
| chr06 | E | 6q14 | 3 | 79125000 | 2066 | nofs | nofs      |
| chr06 | E | 6q14 | 3 | 79375000 | 2093 | nofs | nofs      |
| chr06 | E | 6q14 | 3 | 79625000 | 1459 | nofs | nofs      |
| chr06 | E | 6q14 | 3 | 79875000 | 2001 | nofs | nofs      |
| chr06 | E | 6q14 | 3 | 80125000 | 1403 | nofs | nofs      |
| chr06 | E | 6q14 | 3 | 80375000 | 2167 | nofs | nofs      |
| chr06 | E | 6q14 | 3 | 80625000 | 1806 | nofs | nofs      |
| chr06 | E | 6q14 | 3 | 80875000 | 2562 | nofs | nofs      |
| chr06 | E | 6q14 | 3 | 81125000 | 1806 | nofs | nofs      |
| chr06 | E | 6q14 | 3 | 81375000 | 3198 | nofs | nofs      |
| chr06 | E | 6q14 | 3 | 81625000 | 2355 | nofs | nofs      |
| chr06 | E | 6q14 | 3 | 81875000 | 2371 | nofs | nofs      |

|       |   |      |   |          |      |           |           |
|-------|---|------|---|----------|------|-----------|-----------|
| chr06 | E | 6q14 | 3 | 82125000 | 3833 | nofs      | nofs      |
| chr06 | E | 6q14 | 3 | 82375000 | 2313 | nofs      | nofs      |
| chr06 | E | 6q14 | 3 | 82625000 | 2348 | nofs      | nofs      |
| chr06 | E | 6q14 | 3 | 82875000 | 1833 | nofs      | nofs      |
| chr06 | E | 6q14 | 3 | 83125000 | 2637 | nofs      | nofs      |
| chr06 | E | 6q14 | 3 | 83375000 | 2414 | nofs      | nofs      |
| chr06 | E | 6q14 | 3 | 83625000 | 1539 | nofs      | nofs      |
| chr06 | E | 6q14 | 3 | 83875000 | 1754 | nofs      | nofs      |
| chr06 | E | 6q14 | 3 | 84125000 | 3134 | nofs      | nofs      |
| chr06 | E | 6q14 | 3 | 84375000 | 2118 | nofs      | nofs      |
| chr06 | E | 6q14 | 3 | 84625000 | 1929 | nofs      | nofs      |
| chr06 | E | 6q14 | 3 | 84875000 | 3281 | nofs      | nofs      |
| chr06 | E | 6q14 | 3 | 85125000 | 2670 | nofs      | nofs      |
| chr06 | E | 6q14 | 3 | 85375000 | 2967 | nofs      | nofs      |
| chr06 | E | 6q14 | 3 | 85625000 | 2085 | nofs      | nofs      |
| chr06 | E | 6q14 | 3 | 85875000 | 1838 | nofs      | nofs      |
| chr06 | E | 6q14 | 3 | 86125000 | 2598 | nofs      | nofs      |
| chr06 | E | 6q14 | 3 | 86375000 | 2073 | nofs      | nofs      |
| chr06 | E | 6q14 | 3 | 86625000 | 2728 | nofs      | nofs      |
| chr06 | E | 6q14 | 3 | 86875000 | 1610 | nofs      | nofs      |
| chr06 | E | 6q14 | 3 | 87125000 | 2507 | nofs      | nofs      |
| chr06 | E | 6q14 | 3 | 87375000 | 3401 | nofs      | nofs      |
| chr06 | E | 6q15 | 1 | 87625000 | 2198 | fs common | fs common |
| chr06 | E | 6q15 | 1 | 87875000 | 4825 | fs common | fs common |
| chr06 | E | 6q15 | 1 | 88125000 | 2205 | fs common | fs common |
| chr06 | E | 6q15 | 1 | 88375000 | 2490 | fs common | fs common |
| chr06 | E | 6q15 | 1 | 88625000 | 3706 | fs common | fs common |
| chr06 | E | 6q15 | 1 | 88875000 | 2194 | fs common | fs common |
| chr06 | E | 6q15 | 1 | 89125000 | 2219 | fs common | fs common |
| chr06 | E | 6q15 | 1 | 89375000 | 2126 | fs common | fs common |
| chr06 | E | 6q15 | 1 | 89625000 | 4065 | fs common | fs common |
| chr06 | E | 6q15 | 1 | 89875000 | 3754 | fs common | fs common |
| chr06 | E | 6q15 | 1 | 90125000 | 3080 | fs common | fs common |
| chr06 | E | 6q15 | 1 | 90375000 | 1403 | fs common | fs common |
| chr06 | E | 6q15 | 1 | 90625000 | 3197 | fs common | fs common |
| chr06 | E | 6q15 | 1 | 90875000 | 1542 | fs common | fs common |



|       |   |        |   |          |      |      |           |
|-------|---|--------|---|----------|------|------|-----------|
| chr06 | E | 6q15   | 1 | 91125000 | 2354 | fs   | fs common |
| chr06 | E | 6q15   | 1 | 91375000 | 1435 | fs   | fs common |
| chr06 | E | 6q15   | 1 | 91625000 | 2491 | fs   | fs common |
| chr06 | E | 6q15   | 1 | 91875000 | 1991 | fs   | fs common |
| chr06 | E | 6q15   | 1 | 92125000 | 2377 | fs   | fs common |
| chr06 | E | 6q16.1 | 1 | 92375000 | 2312 | nofs | nofs      |
| chr06 | E | 6q16.1 | 1 | 92625000 | 2111 | nofs | nofs      |
| chr06 | E | 6q16.1 | 1 | 92875000 | 3352 | nofs | nofs      |
| chr06 | E | 6q16.1 | 1 | 93125000 | 2576 | nofs | nofs      |
| chr06 | E | 6q16.1 | 1 | 93375000 | 2573 | nofs | nofs      |
| chr06 | E | 6q16.1 | 1 | 93625000 | 1663 | nofs | nofs      |
| chr06 | E | 6q16.1 | 1 | 93875000 | 1773 | nofs | nofs      |
| chr06 | E | 6q16.1 | 1 | 94125000 | 1631 | nofs | nofs      |
| chr06 | E | 6q16.1 | 1 | 94375000 | 1863 | nofs | nofs      |
| chr06 | E | 6q16.1 | 1 | 94625000 | 2067 | nofs | nofs      |
| chr06 | E | 6q16.1 | 1 | 94875000 | 2490 | nofs | nofs      |
| chr06 | E | 6q16.1 | 1 | 95125000 | 2445 | nofs | nofs      |
| chr06 | E | 6q16.1 | 1 | 95375000 | 2969 | nofs | nofs      |
| chr06 | E | 6q16.1 | 1 | 95625000 | 2234 | nofs | nofs      |
| chr06 | E | 6q16.1 | 1 | 95875000 | 436  | nofs | nofs      |
| chr06 | E | 6q16.1 | 1 | 96125000 | 4400 | nofs | nofs      |
| chr06 | E | 6q16.1 | 1 | 96375000 | 1636 | nofs | nofs      |
| chr06 | E | 6q16.1 | 1 | 96625000 | 1880 | nofs | nofs      |
| chr06 | E | 6q16.1 | 1 | 96875000 | 1722 | nofs | nofs      |
| chr06 | E | 6q16.1 | 1 | 97125000 | 1582 | nofs | nofs      |
| chr06 | E | 6q16.1 | 1 | 97375000 | 2302 | nofs | nofs      |
| chr06 | E | 6q16.1 | 1 | 97625000 | 1178 | nofs | nofs      |
| chr06 | E | 6q16.1 | 1 | 97875000 | 1761 | nofs | nofs      |
| chr06 | E | 6q16.1 | 1 | 98125000 | 2358 | nofs | nofs      |
| chr06 | E | 6q16.1 | 1 | 98375000 | 2130 | nofs | nofs      |
| chr06 | E | 6q16.1 | 1 | 98625000 | 1800 | nofs | nofs      |
| chr06 | B | 6q16.2 | . | 98875000 | 2828 | nofs | nofs      |
| chr06 | B | 6q16.2 | . | 99125000 | 2135 | nofs | nofs      |
| chr06 | B | 6q16.2 | . | 99375000 | 1705 | nofs | nofs      |
| chr06 | B | 6q16.2 | . | 99625000 | 2734 | nofs | nofs      |
| chr06 | B | 6q16.2 | . | 99875000 | 2272 | nofs | nofs      |

|       |   |        |   |           |       |      |           |
|-------|---|--------|---|-----------|-------|------|-----------|
| chr06 | E | 6q16.3 | 2 | 100000000 | 2540  | nofs | nofs      |
| chr06 | E | 6q16.3 | 2 | 100000000 | 1966  | nofs | nofs      |
| chr06 | E | 6q16.3 | 2 | 101000000 | 1361  | nofs | nofs      |
| chr06 | E | 6q16.3 | 2 | 101000000 | 2821  | nofs | nofs      |
| chr06 | E | 6q16.3 | 2 | 101000000 | 2335  | nofs | nofs      |
| chr06 | E | 6q16.3 | 2 | 101000000 | 1889  | nofs | nofs      |
| chr06 | E | 6q16.3 | 2 | 102000000 | 3839  | nofs | nofs      |
| chr06 | E | 6q16.3 | 2 | 102000000 | 2507  | nofs | nofs      |
| chr06 | E | 6q16.3 | 2 | 102000000 | 2230  | nofs | nofs      |
| chr06 | E | 6q16.3 | 2 | 102000000 | 2980  | nofs | nofs      |
| chr06 | E | 6q16.3 | 2 | 103000000 | 2633  | nofs | nofs      |
| chr06 | E | 6q16.3 | 2 | 103000000 | 3718  | nofs | nofs      |
| chr06 | E | 6q16.3 | 2 | 103000000 | 3446  | nofs | nofs      |
| chr06 | E | 6q16.3 | 2 | 103000000 | 2628  | nofs | nofs      |
| chr06 | E | 6q16.3 | 2 | 104000000 | 2082  | nofs | nofs      |
| chr06 | E | 6q16.3 | 2 | 104000000 | 2709  | nofs | nofs      |
| chr06 | E | 6q16.3 | 2 | 104000000 | 11647 | nofs | nofs      |
| chr06 | E | 6q16.3 | 2 | 104000000 | 3518  | nofs | nofs      |
| chr06 | E | 6q16.3 | 2 | 105000000 | 1375  | nofs | nofs      |
| chr06 | E | 6q16.3 | 2 | 105000000 | 1934  | nofs | nofs      |
| chr06 | E | 6q16.3 | 2 | 105000000 | 2459  | nofs | nofs      |
| chr06 | B | 6q21   | . | 105000000 | 3261  | fs   | fs common |
| chr06 | B | 6q21   | . | 106000000 | 3505  | fs   | fs common |
| chr06 | B | 6q21   | . | 106000000 | 1693  | fs   | fs common |
| chr06 | B | 6q21   | . | 106000000 | 1142  | fs   | fs common |
| chr06 | B | 6q21   | . | 106000000 | 3441  | fs   | fs common |
| chr06 | B | 6q21   | . | 107000000 | 2610  | fs   | fs common |
| chr06 | B | 6q21   | . | 107000000 | 2370  | fs   | fs common |
| chr06 | B | 6q21   | . | 107000000 | 2254  | fs   | fs common |
| chr06 | B | 6q21   | . | 107000000 | 4353  | fs   | fs common |
| chr06 | B | 6q21   | . | 108000000 | 4156  | fs   | fs common |
| chr06 | B | 6q21   | . | 108000000 | 1701  | fs   | fs common |
| chr06 | B | 6q21   | . | 108000000 | 3005  | fs   | fs common |
| chr06 | B | 6q21   | . | 108000000 | 4592  | fs   | fs common |
| chr06 | B | 6q21   | . | 109000000 | 3201  | fs   | fs common |
| chr06 | B | 6q21   | . | 109000000 | 3226  | fs   | fs common |

|       |   |        |   |           |      |      |           |
|-------|---|--------|---|-----------|------|------|-----------|
| chr06 | B | 6q21   | . | 109000000 | 1440 | fs   | fs common |
| chr06 | B | 6q21   | . | 109000000 | 4625 | fs   | fs common |
| chr06 | B | 6q21   | . | 110000000 | 2110 | fs   | fs common |
| chr06 | B | 6q21   | . | 110000000 | 1755 | fs   | fs common |
| chr06 | B | 6q21   | . | 110000000 | 2048 | fs   | fs common |
| chr06 | B | 6q21   | . | 110000000 | 3397 | fs   | fs common |
| chr06 | B | 6q21   | . | 111000000 | 2268 | fs   | fs common |
| chr06 | B | 6q21   | . | 111000000 | 2362 | fs   | fs common |
| chr06 | B | 6q21   | . | 111000000 | 2462 | fs   | fs common |
| chr06 | B | 6q21   | . | 111000000 | 3346 | fs   | fs common |
| chr06 | B | 6q21   | . | 112000000 | 4051 | fs   | fs common |
| chr06 | B | 6q21   | . | 112000000 | 1809 | fs   | fs common |
| chr06 | B | 6q21   | . | 112000000 | 2235 | fs   | fs common |
| chr06 | B | 6q21   | . | 112000000 | 3458 | fs   | fs common |
| chr06 | B | 6q21   | . | 113000000 | 3080 | fs   | fs common |
| chr06 | B | 6q21   | . | 113000000 | 2714 | fs   | fs common |
| chr06 | B | 6q21   | . | 113000000 | 3388 | fs   | fs common |
| chr06 | B | 6q21   | . | 113000000 | 2230 | fs   | fs common |
| chr06 | B | 6q21   | . | 114000000 | 2548 | fs   | fs common |
| chr06 | B | 6q21   | . | 114000000 | 2818 | fs   | fs common |
| chr06 | B | 6q21   | . | 114000000 | 6151 | fs   | fs common |
| chr06 | B | 6q21   | . | 114000000 | 2899 | fs   | fs common |
| chr06 | E | 6q22.1 | 4 | 115000000 | 979  | nofs | nofs      |
| chr06 | E | 6q22.1 | 4 | 115000000 | 4187 | nofs | nofs      |
| chr06 | E | 6q22.1 | 4 | 115000000 | 1860 | nofs | nofs      |
| chr06 | E | 6q22.1 | 4 | 115000000 | 2831 | nofs | nofs      |
| chr06 | E | 6q22.1 | 4 | 116000000 | 2669 | nofs | nofs      |
| chr06 | E | 6q22.1 | 4 | 116000000 | 2330 | nofs | nofs      |
| chr06 | E | 6q22.1 | 4 | 116000000 | 1281 | nofs | nofs      |
| chr06 | E | 6q22.1 | 4 | 116000000 | 3658 | nofs | nofs      |
| chr06 | E | 6q22.1 | 4 | 117000000 | 2155 | nofs | nofs      |
| chr06 | E | 6q22.1 | 4 | 117000000 | 1719 | nofs | nofs      |
| chr06 | E | 6q22.1 | 4 | 117000000 | 2401 | nofs | nofs      |
| chr06 | E | 6q22.1 | 4 | 117000000 | 1844 | nofs | nofs      |
| chr06 | E | 6q22.1 | 4 | 118000000 | 1686 | nofs | nofs      |
| chr06 | E | 6q22.1 | 4 | 118000000 | 1513 | nofs | nofs      |

|       |   |        |   |           |      |      |      |
|-------|---|--------|---|-----------|------|------|------|
| chr06 | E | 6q22.1 | 4 | 118000000 | 3175 | nofs | nofs |
| chr06 | E | 6q22.1 | 4 | 118000000 | 3001 | nofs | nofs |
| chr06 | B | 6q22.2 | . | 119000000 | 1928 | nofs | nofs |
| chr06 | E | 6q22.3 | 4 | 119000000 | 1832 | nofs | nofs |
| chr06 | E | 6q22.3 | 4 | 119000000 | 2516 | nofs | nofs |
| chr06 | E | 6q22.3 | 4 | 119000000 | 2216 | nofs | nofs |
| chr06 | E | 6q22.3 | 4 | 120000000 | 1734 | nofs | nofs |
| chr06 | E | 6q22.3 | 4 | 120000000 | 2155 | nofs | nofs |
| chr06 | E | 6q22.3 | 4 | 120000000 | 3281 | nofs | nofs |
| chr06 | E | 6q22.3 | 4 | 120000000 | 1407 | nofs | nofs |
| chr06 | E | 6q22.3 | 4 | 121000000 | 2667 | nofs | nofs |
| chr06 | E | 6q22.3 | 4 | 121000000 | 1666 | nofs | nofs |
| chr06 | E | 6q22.3 | 4 | 121000000 | 2689 | nofs | nofs |
| chr06 | E | 6q22.3 | 4 | 121000000 | 2304 | nofs | nofs |
| chr06 | E | 6q22.3 | 4 | 122000000 | 1619 | nofs | nofs |
| chr06 | E | 6q22.3 | 4 | 122000000 | 3310 | nofs | nofs |
| chr06 | E | 6q22.3 | 4 | 122000000 | 2824 | nofs | nofs |
| chr06 | E | 6q22.3 | 4 | 122000000 | 2427 | nofs | nofs |
| chr06 | E | 6q22.3 | 4 | 123000000 | 2105 | nofs | nofs |
| chr06 | E | 6q22.3 | 4 | 123000000 | 1939 | nofs | nofs |
| chr06 | E | 6q22.3 | 4 | 123000000 | 4512 | nofs | nofs |
| chr06 | E | 6q22.3 | 4 | 123000000 | 2333 | nofs | nofs |
| chr06 | E | 6q22.3 | 4 | 124000000 | 3218 | nofs | nofs |
| chr06 | E | 6q22.3 | 4 | 124000000 | 2360 | nofs | nofs |
| chr06 | E | 6q22.3 | 4 | 124000000 | 1754 | nofs | nofs |
| chr06 | E | 6q22.3 | 4 | 124000000 | 2694 | nofs | nofs |
| chr06 | E | 6q22.3 | 4 | 125000000 | 2182 | nofs | nofs |
| chr06 | E | 6q22.3 | 4 | 125000000 | 1852 | nofs | nofs |
| chr06 | E | 6q22.3 | 4 | 125000000 | 1849 | nofs | nofs |
| chr06 | E | 6q22.3 | 4 | 125000000 | 3115 | nofs | nofs |
| chr06 | E | 6q22.3 | 4 | 126000000 | 2749 | nofs | nofs |
| chr06 | E | 6q22.3 | 4 | 126000000 | 3318 | nofs | nofs |
| chr06 | E | 6q22.3 | 4 | 126000000 | 2858 | nofs | nofs |
| chr06 | E | 6q22.3 | 4 | 126000000 | 890  | nofs | nofs |
| chr06 | E | 6q22.3 | 4 | 127000000 | 2289 | nofs | nofs |
| chr06 | E | 6q22.3 | 4 | 127000000 | 2620 | nofs | nofs |

|       |   |        |   |           |      |      |      |
|-------|---|--------|---|-----------|------|------|------|
| chr06 | E | 6q22.3 | 4 | 127000000 | 2540 | nofs | nofs |
| chr06 | E | 6q22.3 | 4 | 127000000 | 1369 | nofs | nofs |
| chr06 | E | 6q22.3 | 4 | 128000000 | 1539 | nofs | nofs |
| chr06 | E | 6q22.3 | 4 | 128000000 | 2210 | nofs | nofs |
| chr06 | E | 6q22.3 | 4 | 128000000 | 2672 | nofs | nofs |
| chr06 | E | 6q22.3 | 4 | 128000000 | 1338 | nofs | nofs |
| chr06 | E | 6q22.3 | 4 | 129000000 | 1216 | nofs | nofs |
| chr06 | E | 6q22.3 | 4 | 129000000 | 3589 | nofs | nofs |
| chr06 | E | 6q22.3 | 4 | 129000000 | 1543 | nofs | nofs |
| chr06 | E | 6q22.3 | 4 | 129000000 | 1979 | nofs | nofs |
| chr06 | E | 6q22.3 | 4 | 130000000 | 3209 | nofs | nofs |
| chr06 | E | 6q22.3 | 4 | 130000000 | 2805 | nofs | nofs |
| chr06 | E | 6q22.3 | 4 | 130000000 | 2047 | nofs | nofs |
| chr06 | E | 6q22.3 | 4 | 130000000 | 2326 | nofs | nofs |
| chr06 | B | 6q23.1 | . | 131000000 | 2255 | nofs | nofs |
| chr06 | B | 6q23.1 | . | 131000000 | 1121 | nofs | nofs |
| chr06 | B | 6q23.1 | . | 131000000 | 2539 | nofs | nofs |
| chr06 | B | 6q23.1 | . | 131000000 | 1652 | nofs | nofs |
| chr06 | E | 6q23.2 | 2 | 132000000 | 3060 | nofs | nofs |
| chr06 | E | 6q23.2 | 2 | 132000000 | 2692 | nofs | nofs |
| chr06 | E | 6q23.2 | 2 | 132000000 | 3333 | nofs | nofs |
| chr06 | E | 6q23.2 | 2 | 132000000 | 2704 | nofs | nofs |
| chr06 | E | 6q23.2 | 2 | 133000000 | 2781 | nofs | nofs |
| chr06 | E | 6q23.2 | 2 | 133000000 | 1777 | nofs | nofs |
| chr06 | E | 6q23.2 | 2 | 133000000 | 2296 | nofs | nofs |
| chr06 | E | 6q23.2 | 2 | 133000000 | 2142 | nofs | nofs |
| chr06 | E | 6q23.2 | 2 | 134000000 | 2302 | nofs | nofs |
| chr06 | E | 6q23.2 | 2 | 134000000 | 2051 | nofs | nofs |
| chr06 | E | 6q23.2 | 2 | 134000000 | 3631 | nofs | nofs |
| chr06 | E | 6q23.2 | 2 | 134000000 | 2613 | nofs | nofs |
| chr06 | E | 6q23.2 | 2 | 135000000 | 4934 | nofs | nofs |
| chr06 | E | 6q23.2 | 2 | 135000000 | 4374 | nofs | nofs |
| chr06 | E | 6q23.2 | 2 | 135000000 | 2588 | nofs | nofs |
| chr06 | E | 6q23.2 | 2 | 135000000 | 2745 | nofs | nofs |
| chr06 | B | 6q23.3 | . | 136000000 | 3243 | nofs | nofs |
| chr06 | B | 6q23.3 | . | 136000000 | 2792 | nofs | nofs |

|       |   |        |   |           |      |      |      |
|-------|---|--------|---|-----------|------|------|------|
| chr06 | B | 6q23.3 | . | 136000000 | 2677 | nofs | nofs |
| chr06 | B | 6q23.3 | . | 136000000 | 2800 | nofs | nofs |
| chr06 | B | 6q23.3 | . | 137000000 | 2622 | nofs | nofs |
| chr06 | B | 6q23.3 | . | 137000000 | 2059 | nofs | nofs |
| chr06 | B | 6q23.3 | . | 137000000 | 1477 | nofs | nofs |
| chr06 | B | 6q23.3 | . | 137000000 | 3961 | nofs | nofs |
| chr06 | B | 6q23.3 | . | 138000000 | 2253 | nofs | nofs |
| chr06 | B | 6q23.3 | . | 138000000 | 2737 | nofs | nofs |
| chr06 | B | 6q23.3 | . | 138000000 | 2420 | nofs | nofs |
| chr06 | B | 6q23.3 | . | 138000000 | 3528 | nofs | nofs |
| chr06 | B | 6q23.3 | . | 139000000 | 2564 | nofs | nofs |
| chr06 | B | 6q23.3 | . | 139000000 | 2117 | nofs | nofs |
| chr06 | E | 6q24   | 1 | 139000000 | 1779 | nofs | nofs |
| chr06 | E | 6q24   | 1 | 139000000 | 3289 | nofs | nofs |
| chr06 | E | 6q24   | 1 | 140000000 | 1949 | nofs | nofs |
| chr06 | E | 6q24   | 1 | 140000000 | 4425 | nofs | nofs |
| chr06 | E | 6q24   | 1 | 140000000 | 1959 | nofs | nofs |
| chr06 | E | 6q24   | 1 | 140000000 | 1934 | nofs | nofs |
| chr06 | E | 6q24   | 1 | 141000000 | 2771 | nofs | nofs |
| chr06 | E | 6q24   | 1 | 141000000 | 2479 | nofs | nofs |
| chr06 | E | 6q24   | 1 | 141000000 | 5500 | nofs | nofs |
| chr06 | E | 6q24   | 1 | 141000000 | 2964 | nofs | nofs |
| chr06 | E | 6q24   | 1 | 142000000 | 3995 | nofs | nofs |
| chr06 | E | 6q24   | 1 | 142000000 | 2812 | nofs | nofs |
| chr06 | E | 6q24   | 1 | 142000000 | 1899 | nofs | nofs |
| chr06 | E | 6q24   | 1 | 142000000 | 2998 | nofs | nofs |
| chr06 | E | 6q24   | 1 | 143000000 | 2858 | nofs | nofs |
| chr06 | E | 6q24   | 1 | 143000000 | 1868 | nofs | nofs |
| chr06 | E | 6q24   | 1 | 143000000 | 2558 | nofs | nofs |
| chr06 | E | 6q24   | 1 | 143000000 | 1708 | nofs | nofs |
| chr06 | E | 6q24   | 1 | 144000000 | 1865 | nofs | nofs |
| chr06 | E | 6q24   | 1 | 144000000 | 2227 | nofs | nofs |
| chr06 | E | 6q24   | 1 | 144000000 | 3862 | nofs | nofs |
| chr06 | E | 6q24   | 1 | 144000000 | 2683 | nofs | nofs |
| chr06 | E | 6q24   | 1 | 145000000 | 2676 | nofs | nofs |
| chr06 | E | 6q24   | 1 | 145000000 | 3904 | nofs | nofs |

|       |   |        |   |           |      |      |      |
|-------|---|--------|---|-----------|------|------|------|
| chr06 | E | 6q24   | 1 | 145000000 | 2921 | nofs | nofs |
| chr06 | E | 6q24   | 1 | 145000000 | 2989 | nofs | nofs |
| chr06 | E | 6q24   | 1 | 146000000 | 2025 | nofs | nofs |
| chr06 | E | 6q24   | 1 | 146000000 | 1570 | nofs | nofs |
| chr06 | E | 6q24   | 1 | 146000000 | 1275 | nofs | nofs |
| chr06 | E | 6q24   | 1 | 146000000 | 1077 | nofs | nofs |
| chr06 | E | 6q24   | 1 | 147000000 | 2062 | nofs | nofs |
| chr06 | E | 6q24   | 1 | 147000000 | 2710 | nofs | nofs |
| chr06 | E | 6q24   | 1 | 147000000 | 2316 | nofs | nofs |
| chr06 | E | 6q24   | 1 | 147000000 | 1522 | nofs | nofs |
| chr06 | E | 6q24   | 1 | 148000000 | 1871 | nofs | nofs |
| chr06 | E | 6q24   | 1 | 148000000 | 2477 | nofs | nofs |
| chr06 | E | 6q24   | 1 | 148000000 | 1452 | nofs | nofs |
| chr06 | E | 6q24   | 1 | 148000000 | 1878 | nofs | nofs |
| chr06 | E | 6q24   | 1 | 149000000 | 4598 | nofs | nofs |
| chr06 | E | 6q24   | 1 | 149000000 | 4171 | nofs | nofs |
| chr06 | E | 6q24   | 1 | 149000000 | 4905 | nofs | nofs |
| chr06 | E | 6q25.1 | 2 | 149000000 | 2389 | nofs | nofs |
| chr06 | E | 6q25.1 | 2 | 150000000 | 3022 | nofs | nofs |
| chr06 | E | 6q25.1 | 2 | 150000000 | 3576 | nofs | nofs |
| chr06 | E | 6q25.1 | 2 | 150000000 | 5901 | nofs | nofs |
| chr06 | E | 6q25.1 | 2 | 150000000 | 6698 | nofs | nofs |
| chr06 | E | 6q25.1 | 2 | 151000000 | 5279 | nofs | nofs |
| chr06 | E | 6q25.1 | 2 | 151000000 | 3513 | nofs | nofs |
| chr06 | E | 6q25.1 | 2 | 151000000 | 3303 | nofs | nofs |
| chr06 | E | 6q25.1 | 2 | 151000000 | 3355 | nofs | nofs |
| chr06 | E | 6q25.1 | 2 | 152000000 | 4468 | nofs | nofs |
| chr06 | E | 6q25.1 | 2 | 152000000 | 6155 | nofs | nofs |
| chr06 | E | 6q25.1 | 2 | 152000000 | 1927 | nofs | nofs |
| chr06 | E | 6q25.1 | 2 | 152000000 | 3920 | nofs | nofs |
| chr06 | E | 6q25.1 | 2 | 153000000 | 3159 | nofs | nofs |
| chr06 | E | 6q25.2 | 1 | 153000000 | 3081 | nofs | nofs |
| chr06 | E | 6q25.2 | 1 | 153000000 | 3302 | nofs | nofs |
| chr06 | E | 6q25.2 | 1 | 153000000 | 2302 | nofs | nofs |
| chr06 | E | 6q25.2 | 1 | 154000000 | 2431 | nofs | nofs |
| chr06 | E | 6q25.2 | 1 | 154000000 | 2346 | nofs | nofs |

|       |   |        |   |           |       |           |           |
|-------|---|--------|---|-----------|-------|-----------|-----------|
| chr06 | E | 6q25.2 | 1 | 154000000 | 2158  | nofs      | nofs      |
| chr06 | E | 6q25.2 | 1 | 154000000 | 3154  | nofs      | nofs      |
| chr06 | E | 6q25.2 | 1 | 155000000 | 3272  | nofs      | nofs      |
| chr06 | E | 6q25.2 | 1 | 155000000 | 5646  | nofs      | nofs      |
| chr06 | E | 6q25.2 | 1 | 155000000 | 3141  | nofs      | nofs      |
| chr06 | E | 6q25.2 | 1 | 155000000 | 6722  | nofs      | nofs      |
| chr06 | E | 6q25.2 | 1 | 156000000 | 3872  | nofs      | nofs      |
| chr06 | E | 6q25.3 | 2 | 156000000 | 1570  | nofs      | nofs      |
| chr06 | E | 6q25.3 | 2 | 156000000 | 5016  | nofs      | nofs      |
| chr06 | E | 6q25.3 | 2 | 156000000 | 1622  | nofs      | nofs      |
| chr06 | E | 6q25.3 | 2 | 157000000 | 2952  | nofs      | nofs      |
| chr06 | E | 6q25.3 | 2 | 157000000 | 3199  | nofs      | nofs      |
| chr06 | E | 6q25.3 | 2 | 157000000 | 3504  | nofs      | nofs      |
| chr06 | E | 6q25.3 | 2 | 157000000 | 2748  | nofs      | nofs      |
| chr06 | E | 6q25.3 | 2 | 158000000 | 5921  | nofs      | nofs      |
| chr06 | E | 6q25.3 | 2 | 158000000 | 4445  | nofs      | nofs      |
| chr06 | E | 6q25.3 | 2 | 158000000 | 5577  | nofs      | nofs      |
| chr06 | E | 6q25.3 | 2 | 158000000 | 4191  | nofs      | nofs      |
| chr06 | E | 6q25.3 | 2 | 159000000 | 9381  | nofs      | nofs      |
| chr06 | E | 6q25.3 | 2 | 159000000 | 3449  | nofs      | nofs      |
| chr06 | E | 6q25.3 | 2 | 159000000 | 4115  | nofs      | nofs      |
| chr06 | E | 6q25.3 | 2 | 159000000 | 4240  | nofs      | nofs      |
| chr06 | E | 6q25.3 | 2 | 160000000 | 4359  | nofs      | nofs      |
| chr06 | E | 6q25.3 | 2 | 160000000 | 4428  | nofs      | nofs      |
| chr06 | E | 6q25.3 | 2 | 160000000 | 6852  | nofs      | nofs      |
| chr06 | E | 6q25.3 | 2 | 160000000 | 6239  | nofs      | nofs      |
| chr06 | E | 6q25.3 | 2 | 161000000 | 6653  | nofs      | nofs      |
| chr06 | E | 6q25.3 | 2 | 161000000 | 3212  | nofs      | nofs      |
| chr06 | B | 6q26   | . | 161000000 | 21107 | fs common | fs common |
| chr06 | B | 6q26   | . | 161000000 | 2939  | fs common | fs common |
| chr06 | B | 6q26   | . | 162000000 | 5259  | fs common | fs common |
| chr06 | B | 6q26   | . | 162000000 | 5656  | fs common | fs common |
| chr06 | B | 6q26   | . | 162000000 | 5158  | fs common | fs common |
| chr06 | B | 6q26   | . | 162000000 | 5764  | fs common | fs common |
| chr06 | B | 6q26   | . | 163000000 | 3765  | fs common | fs common |
| chr06 | B | 6q26   | . | 163000000 | 3663  | fs common | fs common |



|       |   |      |   |           |       |      |           |
|-------|---|------|---|-----------|-------|------|-----------|
| chr06 | B | 6q26 | . | 163000000 | 2606  | fs   | fs common |
| chr06 | B | 6q26 | . | 163000000 | 4856  | fs   | fs common |
| chr06 | B | 6q26 | . | 164000000 | 4034  | fs   | fs common |
| chr06 | B | 6q26 | . | 164000000 | 1934  | fs   | fs common |
| chr06 | B | 6q26 | . | 164000000 | 3854  | fs   | fs common |
| chr06 | B | 6q26 | . | 164000000 | 3958  | fs   | fs common |
| chr06 | B | 6q26 | . | 165000000 | 3292  | fs   | fs common |
| chr06 | E | 6q27 | 2 | 165000000 | 1539  | nofs | nofs      |
| chr06 | E | 6q27 | 2 | 165000000 | 4287  | nofs | nofs      |
| chr06 | E | 6q27 | 2 | 165000000 | 5860  | nofs | nofs      |
| chr06 | E | 6q27 | 2 | 166000000 | 4211  | nofs | nofs      |
| chr06 | E | 6q27 | 2 | 166000000 | 1973  | nofs | nofs      |
| chr06 | E | 6q27 | 2 | 166000000 | 7028  | nofs | nofs      |
| chr06 | E | 6q27 | 2 | 166000000 | 6631  | nofs | nofs      |
| chr06 | E | 6q27 | 2 | 167000000 | 6516  | nofs | nofs      |
| chr06 | E | 6q27 | 2 | 167000000 | 7987  | nofs | nofs      |
| chr06 | E | 6q27 | 2 | 167000000 | 7741  | nofs | nofs      |
| chr06 | E | 6q27 | 2 | 167000000 | 6854  | nofs | nofs      |
| chr06 | T | 6q27 | 2 | 168000000 | 6566  | nofs | nofs      |
| chr06 | T | 6q27 | 2 | 168000000 | 17292 | nofs | nofs      |
| chr06 | T | 6q27 | 2 | 168000000 | 8856  | nofs | nofs      |
| chr06 | T | 6q27 | 2 | 168000000 | 19659 | nofs | nofs      |
| chr06 | T | 6q27 | 2 | 169000000 | 23797 | nofs | nofs      |
| chr06 | T | 6q27 | 2 | 169000000 | 23694 | nofs | nofs      |
| chr06 | T | 6q27 | 2 | 169000000 | 17819 | nofs | nofs      |
| chr06 | T | 6q27 | 2 | 169000000 | 17863 | nofs | nofs      |
| chr06 | T | 6q27 | 2 | 170000000 | 12375 | nofs | nofs      |
| chr06 | T | 6q27 | 2 | 170000000 | 9548  | nofs | nofs      |
| chr06 | T | 6q27 | 2 | 170000000 | 12533 | nofs | nofs      |
| chr06 | T | 6q27 | 2 | 170000000 | 36649 | nofs | nofs      |
| chr06 | T | 6q27 | 2 | 171000000 | 22576 | nofs | nofs      |
| chr07 | T | 7p22 | 4 | 125000    | 11950 | fs   | fs common |
| chr07 | T | 7p22 | 4 | 375000    | 13457 | fs   | fs common |
| chr07 | T | 7p22 | 4 | 625000    | 22931 | fs   | fs common |
| chr07 | T | 7p22 | 4 | 875000    | 30462 | fs   | fs common |
| chr07 | T | 7p22 | 4 | 1125000   | 21149 | fs   | fs common |

|       |   |      |   |          |       |      |           |
|-------|---|------|---|----------|-------|------|-----------|
| chr07 | T | 7p22 | 4 | 1375000  | 13048 | fs   | fs common |
| chr07 | T | 7p22 | 4 | 1625000  | 17409 | fs   | fs common |
| chr07 | T | 7p22 | 4 | 1875000  | 18889 | fs   | fs common |
| chr07 | T | 7p22 | 4 | 2125000  | 13408 | fs   | fs common |
| chr07 | T | 7p22 | 4 | 2375000  | 13358 | fs   | fs common |
| chr07 | T | 7p22 | 4 | 2625000  | 6751  | fs   | fs common |
| chr07 | T | 7p22 | 4 | 2875000  | 6098  | fs   | fs common |
| chr07 | T | 7p22 | 4 | 3125000  | 3559  | fs   | fs common |
| chr07 | E | 7p22 | 4 | 3375000  | 4080  | fs   | fs common |
| chr07 | E | 7p22 | 4 | 3625000  | 3353  | fs   | fs common |
| chr07 | E | 7p22 | 4 | 3875000  | 10139 | fs   | fs common |
| chr07 | E | 7p22 | 4 | 4125000  | 12583 | fs   | fs common |
| chr07 | E | 7p22 | 4 | 4375000  | 8263  | fs   | fs common |
| chr07 | E | 7p22 | 4 | 4625000  | 9423  | fs   | fs common |
| chr07 | E | 7p22 | 4 | 4875000  | 6697  | fs   | fs common |
| chr07 | E | 7p22 | 4 | 5125000  | 4578  | fs   | fs common |
| chr07 | E | 7p22 | 4 | 5375000  | 9035  | fs   | fs common |
| chr07 | E | 7p22 | 4 | 5625000  | 6187  | fs   | fs common |
| chr07 | E | 7p22 | 4 | 5875000  | 5602  | fs   | fs common |
| chr07 | E | 7p22 | 4 | 6125000  | 6226  | fs   | fs common |
| chr07 | E | 7p22 | 4 | 6375000  | 6809  | fs   | fs common |
| chr07 | E | 7p22 | 4 | 6625000  | 10267 | fs   | fs common |
| chr07 | E | 7p22 | 4 | 6875000  | 19163 | fs   | fs common |
| chr07 | E | 7p21 | 4 | 7125000  | 1123  | nofs | nofs      |
| chr07 | E | 7p21 | 4 | 7375000  | 3543  | nofs | nofs      |
| chr07 | E | 7p21 | 4 | 7625000  | 1617  | nofs | nofs      |
| chr07 | E | 7p21 | 4 | 7875000  | 2486  | nofs | nofs      |
| chr07 | E | 7p21 | 4 | 8125000  | 2324  | nofs | nofs      |
| chr07 | E | 7p21 | 4 | 8375000  | 1021  | nofs | nofs      |
| chr07 | E | 7p21 | 4 | 8625000  | 1961  | nofs | nofs      |
| chr07 | E | 7p21 | 4 | 8875000  | 2080  | nofs | nofs      |
| chr07 | E | 7p21 | 4 | 9125000  | 1680  | nofs | nofs      |
| chr07 | E | 7p21 | 4 | 9375000  | 1858  | nofs | nofs      |
| chr07 | E | 7p21 | 4 | 9625000  | 4070  | nofs | nofs      |
| chr07 | E | 7p21 | 4 | 9875000  | 2495  | nofs | nofs      |
| chr07 | E | 7p21 | 4 | 10125000 | 2059  | nofs | nofs      |

|       |   |      |   |          |      |      |      |
|-------|---|------|---|----------|------|------|------|
| chr07 | E | 7p21 | 4 | 10375000 | 4290 | nofs | nofs |
| chr07 | E | 7p21 | 4 | 10625000 | 2107 | nofs | nofs |
| chr07 | E | 7p21 | 4 | 10875000 | 3688 | nofs | nofs |
| chr07 | E | 7p21 | 4 | 11125000 | 1308 | nofs | nofs |
| chr07 | E | 7p21 | 4 | 11375000 | 1798 | nofs | nofs |
| chr07 | E | 7p21 | 4 | 11625000 | 1870 | nofs | nofs |
| chr07 | E | 7p21 | 4 | 11875000 | 1794 | nofs | nofs |
| chr07 | E | 7p21 | 4 | 12125000 | 1623 | nofs | nofs |
| chr07 | E | 7p21 | 4 | 12375000 | 5298 | nofs | nofs |
| chr07 | E | 7p21 | 4 | 12625000 | 3431 | nofs | nofs |
| chr07 | E | 7p21 | 4 | 12875000 | 3724 | nofs | nofs |
| chr07 | E | 7p21 | 4 | 13125000 | 3462 | nofs | nofs |
| chr07 | E | 7p21 | 4 | 13375000 | 2768 | nofs | nofs |
| chr07 | E | 7p21 | 4 | 13625000 | 2407 | nofs | nofs |
| chr07 | E | 7p21 | 4 | 13875000 | 1494 | nofs | nofs |
| chr07 | E | 7p21 | 4 | 14125000 | 3033 | nofs | nofs |
| chr07 | E | 7p21 | 4 | 14375000 | 2342 | nofs | nofs |
| chr07 | E | 7p21 | 4 | 14625000 | 2755 | nofs | nofs |
| chr07 | E | 7p21 | 4 | 14875000 | 3903 | nofs | nofs |
| chr07 | E | 7p21 | 4 | 15125000 | 3194 | nofs | nofs |
| chr07 | E | 7p21 | 4 | 15375000 | 3615 | nofs | nofs |
| chr07 | E | 7p21 | 4 | 15625000 | 2519 | nofs | nofs |
| chr07 | E | 7p21 | 4 | 15875000 | 2652 | nofs | nofs |
| chr07 | E | 7p21 | 4 | 16125000 | 1671 | nofs | nofs |
| chr07 | E | 7p21 | 4 | 16375000 | 1844 | nofs | nofs |
| chr07 | E | 7p21 | 4 | 16625000 | 3496 | nofs | nofs |
| chr07 | E | 7p21 | 4 | 16875000 | 2367 | nofs | nofs |
| chr07 | E | 7p21 | 4 | 17125000 | 2336 | nofs | nofs |
| chr07 | E | 7p21 | 4 | 17375000 | 1224 | nofs | nofs |
| chr07 | E | 7p21 | 4 | 17625000 | 2262 | nofs | nofs |
| chr07 | E | 7p21 | 4 | 17875000 | 2253 | nofs | nofs |
| chr07 | E | 7p21 | 4 | 18125000 | 2115 | nofs | nofs |
| chr07 | E | 7p21 | 4 | 18375000 | 2124 | nofs | nofs |
| chr07 | E | 7p21 | 4 | 18625000 | 3173 | nofs | nofs |
| chr07 | E | 7p21 | 4 | 18875000 | 1663 | nofs | nofs |
| chr07 | E | 7p21 | 4 | 19125000 | 3009 | nofs | nofs |

|       |   |        |   |          |      |      |      |
|-------|---|--------|---|----------|------|------|------|
| chr07 | E | 7p21   | 4 | 19375000 | 3205 | nofs | nofs |
| chr07 | E | 7p21   | 4 | 19625000 | 1844 | nofs | nofs |
| chr07 | E | 7p21   | 4 | 19875000 | 2478 | nofs | nofs |
| chr07 | E | 7p21   | 4 | 20125000 | 3698 | nofs | nofs |
| chr07 | E | 7p21   | 4 | 20375000 | 4020 | nofs | nofs |
| chr07 | E | 7p21   | 4 | 20625000 | 2801 | nofs | nofs |
| chr07 | E | 7p15.3 | 4 | 20875000 | 1888 | nofs | nofs |
| chr07 | E | 7p15.3 | 4 | 21125000 | 2729 | nofs | nofs |
| chr07 | E | 7p15.3 | 4 | 21375000 | 2833 | nofs | nofs |
| chr07 | E | 7p15.3 | 4 | 21625000 | 2036 | nofs | nofs |
| chr07 | E | 7p15.3 | 4 | 21875000 | 2568 | nofs | nofs |
| chr07 | E | 7p15.3 | 4 | 22125000 | 1816 | nofs | nofs |
| chr07 | E | 7p15.3 | 4 | 22375000 | 1914 | nofs | nofs |
| chr07 | E | 7p15.3 | 4 | 22625000 | 2910 | nofs | nofs |
| chr07 | E | 7p15.3 | 4 | 22875000 | 4661 | nofs | nofs |
| chr07 | E | 7p15.3 | 4 | 23125000 | 4055 | nofs | nofs |
| chr07 | E | 7p15.3 | 4 | 23375000 | 5839 | nofs | nofs |
| chr07 | E | 7p15.3 | 4 | 23625000 | 3285 | nofs | nofs |
| chr07 | E | 7p15.3 | 4 | 23875000 | 1887 | nofs | nofs |
| chr07 | E | 7p15.3 | 4 | 24125000 | 2864 | nofs | nofs |
| chr07 | E | 7p15.3 | 4 | 24375000 | 1653 | nofs | nofs |
| chr07 | E | 7p15.3 | 4 | 24625000 | 1678 | nofs | nofs |
| chr07 | E | 7p15.3 | 4 | 24875000 | 3427 | nofs | nofs |
| chr07 | E | 7p15.3 | 4 | 25125000 | 2351 | nofs | nofs |
| chr07 | E | 7p15.3 | 4 | 25375000 | 2216 | nofs | nofs |
| chr07 | E | 7p15.2 | 1 | 25625000 | 2185 | nofs | nofs |
| chr07 | E | 7p15.2 | 1 | 25875000 | 3727 | nofs | nofs |
| chr07 | E | 7p15.2 | 1 | 26125000 | 3676 | nofs | nofs |
| chr07 | E | 7p15.2 | 1 | 26375000 | 2456 | nofs | nofs |
| chr07 | E | 7p15.2 | 1 | 26625000 | 2225 | nofs | nofs |
| chr07 | E | 7p15.2 | 1 | 26875000 | 3810 | nofs | nofs |
| chr07 | E | 7p15.2 | 1 | 27125000 | 2718 | nofs | nofs |
| chr07 | E | 7p15.2 | 1 | 27375000 | 1643 | nofs | nofs |
| chr07 | E | 7p15.2 | 1 | 27625000 | 2406 | nofs | nofs |
| chr07 | B | 7p15.1 | . | 27875000 | 2725 | nofs | nofs |
| chr07 | B | 7p15.1 | . | 28125000 | 2121 | nofs | nofs |

|       |   |        |   |          |       |           |           |
|-------|---|--------|---|----------|-------|-----------|-----------|
| chr07 | B | 7p15.1 | . | 28375000 | 12342 | nofs      | nofs      |
| chr07 | B | 7p15.1 | . | 28625000 | 2620  | nofs      | nofs      |
| chr07 | B | 7p15.1 | . | 28875000 | 1627  | nofs      | nofs      |
| chr07 | B | 7p15.1 | . | 29125000 | 3095  | nofs      | nofs      |
| chr07 | B | 7p15.1 | . | 29375000 | 2965  | nofs      | nofs      |
| chr07 | B | 7p15.1 | . | 29625000 | 3536  | nofs      | nofs      |
| chr07 | B | 7p15.1 | . | 29875000 | 2689  | nofs      | nofs      |
| chr07 | B | 7p15.1 | . | 30125000 | 2124  | nofs      | nofs      |
| chr07 | E | 7p14   | 3 | 30375000 | 3641  | nofs      | nofs      |
| chr07 | E | 7p14   | 3 | 30625000 | 3360  | nofs      | nofs      |
| chr07 | E | 7p14   | 3 | 30875000 | 3100  | nofs      | nofs      |
| chr07 | E | 7p14   | 3 | 31125000 | 2887  | nofs      | nofs      |
| chr07 | E | 7p14   | 3 | 31375000 | 1758  | nofs      | nofs      |
| chr07 | E | 7p14   | 3 | 31625000 | 2507  | nofs      | nofs      |
| chr07 | E | 7p14   | 3 | 31875000 | 2224  | nofs      | nofs      |
| chr07 | E | 7p14   | 3 | 32125000 | 3031  | nofs      | nofs      |
| chr07 | E | 7p14   | 3 | 32375000 | 4454  | nofs      | nofs      |
| chr07 | E | 7p14   | 3 | 32625000 | 2998  | nofs      | nofs      |
| chr07 | E | 7p14   | 3 | 32875000 | 3534  | nofs      | nofs      |
| chr07 | E | 7p14   | 3 | 33125000 | 2702  | nofs      | nofs      |
| chr07 | E | 7p14   | 3 | 33375000 | 1927  | nofs      | nofs      |
| chr07 | E | 7p14   | 3 | 33625000 | 2644  | nofs      | nofs      |
| chr07 | E | 7p14   | 3 | 33875000 | 2104  | nofs      | nofs      |
| chr07 | E | 7p14   | 3 | 34125000 | 1991  | nofs      | nofs      |
| chr07 | E | 7p14   | 3 | 34375000 | 1673  | nofs      | nofs      |
| chr07 | E | 7p14   | 3 | 34625000 | 2067  | fs common | fs common |
| chr07 | E | 7p14   | 3 | 34875000 | 3790  | fs common | fs common |
| chr07 | E | 7p14   | 3 | 35125000 | 2834  | fs common | fs common |
| chr07 | E | 7p14   | 3 | 35375000 | 3457  | fs common | fs common |
| chr07 | E | 7p14   | 3 | 35625000 | 2482  | fs common | fs common |
| chr07 | E | 7p14   | 3 | 35875000 | 1666  | fs common | fs common |
| chr07 | E | 7p14   | 3 | 36125000 | 4640  | fs common | fs common |
| chr07 | E | 7p14   | 3 | 36375000 | 4402  | fs common | fs common |
| chr07 | E | 7p14   | 3 | 36625000 | 2259  | fs common | fs common |
| chr07 | E | 7p14   | 3 | 36875000 | 1816  | fs common | fs common |
| chr07 | E | 7p14   | 3 | 37125000 | 4133  | fs common | fs common |

|       |   |      |   |          |      |           |           |
|-------|---|------|---|----------|------|-----------|-----------|
| chr07 | E | 7p14 | 3 | 37375000 | 2645 | nofs      | nofs      |
| chr07 | E | 7p14 | 3 | 37625000 | 7857 | nofs      | nofs      |
| chr07 | E | 7p14 | 3 | 37875000 | 3216 | nofs      | nofs      |
| chr07 | E | 7p14 | 3 | 38125000 | 2439 | nofs      | nofs      |
| chr07 | E | 7p14 | 3 | 38375000 | 3028 | nofs      | nofs      |
| chr07 | E | 7p14 | 3 | 38625000 | 1465 | nofs      | nofs      |
| chr07 | E | 7p14 | 3 | 38875000 | 3241 | nofs      | nofs      |
| chr07 | E | 7p14 | 3 | 39125000 | 2312 | nofs      | nofs      |
| chr07 | E | 7p14 | 3 | 39375000 | 3963 | nofs      | nofs      |
| chr07 | E | 7p14 | 3 | 39625000 | 3196 | nofs      | nofs      |
| chr07 | E | 7p14 | 3 | 39875000 | 2548 | nofs      | nofs      |
| chr07 | E | 7p14 | 3 | 40125000 | 4247 | nofs      | nofs      |
| chr07 | E | 7p14 | 3 | 40375000 | 2092 | nofs      | nofs      |
| chr07 | E | 7p14 | 3 | 40625000 | 1971 | nofs      | nofs      |
| chr07 | E | 7p14 | 3 | 40875000 | 2529 | nofs      | nofs      |
| chr07 | E | 7p14 | 3 | 41125000 | 3962 | nofs      | nofs      |
| chr07 | E | 7p14 | 3 | 41375000 | 2045 | nofs      | nofs      |
| chr07 | E | 7p14 | 3 | 41625000 | 2050 | nofs      | nofs      |
| chr07 | E | 7p14 | 3 | 41875000 | 1875 | nofs      | nofs      |
| chr07 | E | 7p14 | 3 | 42125000 | 2776 | nofs      | nofs      |
| chr07 | E | 7p14 | 3 | 42375000 | 1725 | nofs      | nofs      |
| chr07 | E | 7p14 | 3 | 42625000 | 2790 | nofs      | nofs      |
| chr07 | E | 7p14 | 3 | 42875000 | 1577 | nofs      | nofs      |
| chr07 | E | 7p14 | 3 | 43125000 | 3581 | nofs      | nofs      |
| chr07 | E | 7p13 | 3 | 43375000 | 1864 | fs common | fs common |
| chr07 | E | 7p13 | 3 | 43625000 | 4068 | fs common | fs common |
| chr07 | E | 7p13 | 3 | 43875000 | 3927 | fs common | fs common |
| chr07 | E | 7p13 | 3 | 44125000 | 3772 | fs common | fs common |
| chr07 | E | 7p13 | 3 | 44375000 | 3484 | fs common | fs common |
| chr07 | E | 7p13 | 3 | 44625000 | 7581 | fs common | fs common |
| chr07 | E | 7p13 | 3 | 44875000 | 6061 | fs common | fs common |
| chr07 | E | 7p13 | 3 | 45125000 | 3010 | fs common | fs common |
| chr07 | E | 7p13 | 3 | 45375000 | 3424 | fs common | fs common |
| chr07 | E | 7p13 | 3 | 45625000 | 5572 | fs common | fs common |
| chr07 | E | 7p13 | 3 | 45875000 | 1659 | fs common | fs common |
| chr07 | E | 7p13 | 3 | 46125000 | 2099 | fs common | fs common |

|       |   |        |   |          |      |      |           |
|-------|---|--------|---|----------|------|------|-----------|
| chr07 | E | 7p13   | 3 | 46375000 | 2293 | fs   | fs common |
| chr07 | E | 7p13   | 3 | 46625000 | 2000 | fs   | fs common |
| chr07 | E | 7p13   | 3 | 46875000 | 4288 | fs   | fs common |
| chr07 | E | 7p12   | 2 | 47125000 | 3993 | nofs | nofs      |
| chr07 | E | 7p12   | 2 | 47375000 | 5631 | nofs | nofs      |
| chr07 | E | 7p12   | 2 | 47625000 | 3499 | nofs | nofs      |
| chr07 | E | 7p12   | 2 | 47875000 | 4435 | nofs | nofs      |
| chr07 | E | 7p12   | 2 | 48125000 | 3937 | nofs | nofs      |
| chr07 | E | 7p12   | 2 | 48375000 | 2323 | nofs | nofs      |
| chr07 | E | 7p12   | 2 | 48625000 | 2070 | nofs | nofs      |
| chr07 | E | 7p12   | 2 | 48875000 | 1609 | nofs | nofs      |
| chr07 | E | 7p12   | 2 | 49125000 | 1841 | nofs | nofs      |
| chr07 | E | 7p12   | 2 | 49375000 | 4044 | nofs | nofs      |
| chr07 | E | 7p12   | 2 | 49625000 | 3462 | nofs | nofs      |
| chr07 | E | 7p12   | 2 | 49875000 | 5259 | nofs | nofs      |
| chr07 | E | 7p12   | 2 | 50125000 | 2655 | nofs | nofs      |
| chr07 | E | 7p12   | 2 | 50375000 | 3959 | nofs | nofs      |
| chr07 | E | 7p12   | 2 | 50625000 | 2137 | nofs | nofs      |
| chr07 | E | 7p12   | 2 | 50875000 | 1964 | nofs | nofs      |
| chr07 | E | 7p12   | 2 | 51125000 | 4028 | nofs | nofs      |
| chr07 | E | 7p12   | 2 | 51375000 | 2595 | nofs | nofs      |
| chr07 | E | 7p12   | 2 | 51625000 | 2583 | nofs | nofs      |
| chr07 | E | 7p12   | 2 | 51875000 | 2805 | nofs | nofs      |
| chr07 | E | 7p12   | 2 | 52125000 | 5138 | nofs | nofs      |
| chr07 | E | 7p12   | 2 | 52375000 | 2715 | nofs | nofs      |
| chr07 | E | 7p12   | 2 | 52625000 | 3597 | nofs | nofs      |
| chr07 | E | 7p12   | 2 | 52875000 | 2849 | nofs | nofs      |
| chr07 | E | 7p12   | 2 | 53125000 | 2862 | nofs | nofs      |
| chr07 | E | 7p12   | 2 | 53375000 | 2330 | nofs | nofs      |
| chr07 | E | 7p12   | 2 | 53625000 | 3222 | nofs | nofs      |
| chr07 | E | 7p11.2 | 3 | 53875000 | 2523 | fs   | fs rare   |
| chr07 | E | 7p11.2 | 3 | 54125000 | 4655 | fs   | fs rare   |
| chr07 | E | 7p11.2 | 3 | 54375000 | 3380 | fs   | fs rare   |
| chr07 | E | 7p11.2 | 3 | 54625000 | 2997 | fs   | fs rare   |
| chr07 | C | 7p11.2 | 3 | 54875000 | 2299 | fs   | fs rare   |
| chr07 | C | 7p11.2 | 3 | 55125000 | 8881 | fs   | fs rare   |

|       |   |         |   |          |        |      |           |
|-------|---|---------|---|----------|--------|------|-----------|
| chr07 | C | 7p11.2  | 3 | 55375000 | 2033   | fs   | fs rare   |
| chr07 | C | 7p11.2  | 3 | 55625000 | 6724   | fs   | fs rare   |
| chr07 | C | 7p11.2  | 3 | 55875000 | 5549   | fs   | fs rare   |
| chr07 | C | 7p11.2  | 3 | 56125000 | 9848   | fs   | fs rare   |
| chr07 | C | 7p11.2  | 3 | 56375000 | 4324   | fs   | fs rare   |
| chr07 | C | 7p11.1  | . | 56625000 | 8100   | nofs | nofs      |
| chr07 | C | 7p11.1  | . | 56875000 | 5434   | nofs | nofs      |
| chr07 | C | 7p11.1  | . | 57125000 | 8805   | nofs | nofs      |
| chr07 | C | 7p11.1  | . | 57375000 | 14394  | nofs | nofs      |
| chr07 | C | 7p11.1  | . | 57625000 | 12706  | nofs | nofs      |
| chr07 | C | 7p11.1  | . | 57875000 | 105994 | nofs | nofs      |
| chr07 | C |         | . | 58125000 | 0      | nofs | nofs      |
| chr07 | C |         | . | 58375000 | 0      | nofs | nofs      |
| chr07 | C |         | . | 58625000 | 0      | nofs | nofs      |
| chr07 | C |         | . | 58875000 | 0      | nofs | nofs      |
| chr07 | C |         | . | 59125000 | 0      | nofs | nofs      |
| chr07 | C |         | . | 59375000 | 0      | nofs | nofs      |
| chr07 | C |         | . | 59625000 | 0      | nofs | nofs      |
| chr07 | C |         | . | 59875000 | 0      | nofs | nofs      |
| chr07 | C |         | . | 60125000 | 0      | nofs | nofs      |
| chr07 | C |         | . | 60375000 | 0      | nofs | nofs      |
| chr07 | C |         | . | 60625000 | 0      | nofs | nofs      |
| chr07 | C | 7q11.1  | . | 60875000 | 18948  | nofs | nofs      |
| chr07 | C | 7q11.1  | . | 61125000 | 151738 | nofs | nofs      |
| chr07 | C | 7q11.1  | . | 61375000 | 136256 | nofs | nofs      |
| chr07 | C | 7q11.1  | . | 61625000 | 208842 | nofs | nofs      |
| chr07 | C | 7q11.1  | . | 61875000 | 115739 | nofs | nofs      |
| chr07 | C | 7q11.1  | . | 62125000 | 4586   | nofs | nofs      |
| chr07 | C | 7q11.21 | . | 62375000 | 4650   | fs   | fs common |
| chr07 | C | 7q11.21 | . | 62625000 | 9255   | fs   | fs common |
| chr07 | C | 7q11.21 | . | 62875000 | 5259   | fs   | fs common |
| chr07 | C | 7q11.21 | . | 63125000 | 4012   | fs   | fs common |
| chr07 | C | 7q11.21 | . | 63375000 | 11994  | fs   | fs common |
| chr07 | C | 7q11.21 | . | 63625000 | 9088   | fs   | fs common |
| chr07 | C | 7q11.21 | . | 63875000 | 9203   | fs   | fs common |
| chr07 | B | 7q11.21 | . | 64125000 | 10361  | fs   | fs common |



|       |   |         |   |          |       |    |           |
|-------|---|---------|---|----------|-------|----|-----------|
| chr07 | B | 7q11.21 | . | 64375000 | 12491 | fs | fs common |
| chr07 | B | 7q11.21 | . | 64625000 | 6379  | fs | fs common |
| chr07 | B | 7q11.21 | . | 64875000 | 4083  | fs | fs common |
| chr07 | B | 7q11.21 | . | 65125000 | 5231  | fs | fs common |
| chr07 | B | 7q11.21 | . | 65375000 | 4385  | fs | fs common |
| chr07 | B | 7q11.21 | . | 65625000 | 3830  | fs | fs common |
| chr07 | B | 7q11.21 | . | 65875000 | 6491  | fs | fs common |
| chr07 | B | 7q11.21 | . | 66125000 | 3130  | fs | fs common |
| chr07 | B | 7q11.21 | . | 66375000 | 6849  | fs | fs common |
| chr07 | B | 7q11.21 | . | 66625000 | 7299  | fs | fs common |
| chr07 | E | 7q11.22 | 1 | 66875000 | 9815  | fs | fs common |
| chr07 | E | 7q11.22 | 1 | 67125000 | 7884  | fs | fs common |
| chr07 | E | 7q11.22 | 1 | 67375000 | 12257 | fs | fs common |
| chr07 | E | 7q11.22 | 1 | 67625000 | 8682  | fs | fs common |
| chr07 | E | 7q11.22 | 1 | 67875000 | 6965  | fs | fs common |
| chr07 | E | 7q11.22 | 1 | 68125000 | 5634  | fs | fs common |
| chr07 | E | 7q11.22 | 1 | 68375000 | 3901  | fs | fs common |
| chr07 | E | 7q11.22 | 1 | 68625000 | 1786  | fs | fs common |
| chr07 | E | 7q11.22 | 1 | 68875000 | 3388  | fs | fs common |
| chr07 | E | 7q11.22 | 1 | 69125000 | 1615  | fs | fs common |
| chr07 | E | 7q11.22 | 1 | 69375000 | 3419  | fs | fs common |
| chr07 | E | 7q11.22 | 1 | 69625000 | 3295  | fs | fs common |
| chr07 | E | 7q11.22 | 1 | 69875000 | 5934  | fs | fs common |
| chr07 | E | 7q11.22 | 1 | 70125000 | 4893  | fs | fs common |
| chr07 | E | 7q11.22 | 1 | 70375000 | 3016  | fs | fs common |
| chr07 | E | 7q11.22 | 1 | 70625000 | 7537  | fs | fs common |
| chr07 | E | 7q11.22 | 1 | 70875000 | 4075  | fs | fs common |
| chr07 | E | 7q11.22 | 1 | 71125000 | 5633  | fs | fs common |
| chr07 | E | 7q11.22 | 1 | 71375000 | 8117  | fs | fs common |
| chr07 | E | 7q11.22 | 1 | 71625000 | 3356  | fs | fs common |
| chr07 | E | 7q11.23 | 6 | 71875000 | 5277  | fs | fs common |
| chr07 | E | 7q11.23 | 6 | 72125000 | 5293  | fs | fs common |
| chr07 | E | 7q11.23 | 6 | 72375000 | 8661  | fs | fs common |
| chr07 | E | 7q11.23 | 6 | 72625000 | 8609  | fs | fs common |
| chr07 | E | 7q11.23 | 6 | 72875000 | 8133  | fs | fs common |
| chr07 | E | 7q11.23 | 6 | 73125000 | 7128  | fs | fs common |

|       |   |         |   |          |     |      |      |           |
|-------|---|---------|---|----------|-----|------|------|-----------|
| chr07 | E | 7q11.23 | 6 | 73375000 | 123 | 7723 | fs   | fs common |
| chr07 | E | 7q11.23 | 6 | 73625000 | 123 | 3029 | fs   | fs common |
| chr07 | E | 7q11.23 | 6 | 73875000 | 123 | 5025 | fs   | fs common |
| chr07 | E | 7q11.23 | 6 | 74125000 | 123 | 3591 | fs   | fs common |
| chr07 | E | 7q11.23 | 6 | 74375000 | 123 | 2015 | fs   | fs common |
| chr07 | E | 7q11.23 | 6 | 74625000 | 123 | 5259 | fs   | fs common |
| chr07 | E | 7q11.23 | 6 | 74875000 | 123 | 6250 | fs   | fs common |
| chr07 | E | 7q11.23 | 6 | 75125000 | 123 | 6346 | fs   | fs common |
| chr07 | E | 7q11.23 | 6 | 75375000 | 123 | 4459 | fs   | fs common |
| chr07 | E | 7q11.23 | 6 | 75625000 | 123 | 5644 | fs   | fs common |
| chr07 | E | 7q11.23 | 6 | 75875000 | 123 | 2288 | fs   | fs common |
| chr07 | E | 7q11.23 | 6 | 76125000 | 123 | 2360 | fs   | fs common |
| chr07 | E | 7q11.23 | 6 | 76375000 | 123 | 4914 | fs   | fs common |
| chr07 | E | 7q11.23 | 6 | 76625000 | 123 | 1755 | fs   | fs common |
| chr07 | E | 7q11.23 | 6 | 76875000 | 123 | 6306 | fs   | fs common |
| chr07 | E | 7q11.23 | 6 | 77125000 | 123 | 1980 | fs   | fs common |
| chr07 | E | 7q21.1  | 4 | 77375000 | 123 | 2426 | nofs | nofs      |
| chr07 | E | 7q21.1  | 4 | 77625000 | 123 | 1794 | nofs | nofs      |
| chr07 | E | 7q21.1  | 4 | 77875000 | 123 | 2263 | nofs | nofs      |
| chr07 | E | 7q21.1  | 4 | 78125000 | 123 | 2212 | nofs | nofs      |
| chr07 | E | 7q21.1  | 4 | 78375000 | 123 | 3617 | nofs | nofs      |
| chr07 | E | 7q21.1  | 4 | 78625000 | 123 | 3446 | nofs | nofs      |
| chr07 | E | 7q21.1  | 4 | 78875000 | 123 | 4175 | nofs | nofs      |
| chr07 | E | 7q21.1  | 4 | 79125000 | 123 | 3331 | nofs | nofs      |
| chr07 | E | 7q21.1  | 4 | 79375000 | 123 | 3312 | nofs | nofs      |
| chr07 | E | 7q21.1  | 4 | 79625000 | 123 | 2582 | nofs | nofs      |
| chr07 | E | 7q21.1  | 4 | 79875000 | 123 | 3527 | nofs | nofs      |
| chr07 | E | 7q21.1  | 4 | 80125000 | 123 | 2828 | nofs | nofs      |
| chr07 | E | 7q21.1  | 4 | 80375000 | 123 | 4035 | nofs | nofs      |
| chr07 | E | 7q21.1  | 4 | 80625000 | 123 | 2694 | nofs | nofs      |
| chr07 | E | 7q21.1  | 4 | 80875000 | 123 | 1819 | nofs | nofs      |
| chr07 | E | 7q21.1  | 4 | 81125000 | 123 | 2215 | nofs | nofs      |
| chr07 | E | 7q21.1  | 4 | 81375000 | 123 | 2409 | nofs | nofs      |
| chr07 | E | 7q21.1  | 4 | 81625000 | 123 | 2756 | nofs | nofs      |
| chr07 | E | 7q21.1  | 4 | 81875000 | 123 | 2686 | nofs | nofs      |
| chr07 | E | 7q21.1  | 4 | 82125000 | 123 | 3002 | nofs | nofs      |

|       |   |        |   |          |      |      |           |
|-------|---|--------|---|----------|------|------|-----------|
| chr07 | E | 7q21.1 | 4 | 82375000 | 3904 | nofs | nofs      |
| chr07 | E | 7q21.1 | 4 | 82625000 | 2989 | nofs | nofs      |
| chr07 | E | 7q21.1 | 4 | 82875000 | 2423 | nofs | nofs      |
| chr07 | E | 7q21.1 | 4 | 83125000 | 1764 | nofs | nofs      |
| chr07 | E | 7q21.1 | 4 | 83375000 | 2002 | nofs | nofs      |
| chr07 | E | 7q21.1 | 4 | 83625000 | 3247 | nofs | nofs      |
| chr07 | E | 7q21.1 | 4 | 83875000 | 1978 | nofs | nofs      |
| chr07 | E | 7q21.1 | 4 | 84125000 | 2772 | nofs | nofs      |
| chr07 | E | 7q21.1 | 4 | 84375000 | 2418 | nofs | nofs      |
| chr07 | E | 7q21.1 | 4 | 84625000 | 3254 | nofs | nofs      |
| chr07 | E | 7q21.1 | 4 | 84875000 | 1806 | nofs | nofs      |
| chr07 | E | 7q21.1 | 4 | 85125000 | 2373 | nofs | nofs      |
| chr07 | E | 7q21.1 | 4 | 85375000 | 2808 | nofs | nofs      |
| chr07 | E | 7q21.1 | 4 | 85625000 | 2274 | nofs | nofs      |
| chr07 | E | 7q21.1 | 4 | 85875000 | 1494 | nofs | nofs      |
| chr07 | E | 7q21.1 | 4 | 86125000 | 1375 | nofs | nofs      |
| chr07 | E | 7q21.1 | 4 | 86375000 | 1506 | nofs | nofs      |
| chr07 | E | 7q21.1 | 4 | 86625000 | 1691 | nofs | nofs      |
| chr07 | E | 7q21.1 | 4 | 86875000 | 3410 | nofs | nofs      |
| chr07 | E | 7q21.1 | 4 | 87125000 | 1289 | nofs | nofs      |
| chr07 | E | 7q21.1 | 4 | 87375000 | 1804 | nofs | nofs      |
| chr07 | E | 7q21.1 | 4 | 87625000 | 3978 | nofs | nofs      |
| chr07 | E | 7q21.1 | 4 | 87875000 | 1883 | nofs | nofs      |
| chr07 | E | 7q21.1 | 4 | 88125000 | 2039 | nofs | nofs      |
| chr07 | E | 7q21.1 | 4 | 88375000 | 2557 | nofs | nofs      |
| chr07 | E | 7q21.1 | 4 | 88625000 | 2754 | nofs | nofs      |
| chr07 | E | 7q21.1 | 4 | 88875000 | 2046 | nofs | nofs      |
| chr07 | E | 7q21.1 | 4 | 89125000 | 3539 | nofs | nofs      |
| chr07 | E | 7q21.1 | 4 | 89375000 | 2461 | nofs | nofs      |
| chr07 | E | 7q21.1 | 4 | 89625000 | 2687 | nofs | nofs      |
| chr07 | E | 7q21.1 | 4 | 89875000 | 2406 | nofs | nofs      |
| chr07 | E | 7q21.1 | 4 | 90125000 | 2402 | nofs | nofs      |
| chr07 | E | 7q21.1 | 4 | 90375000 | 2506 | nofs | nofs      |
| chr07 | E | 7q21.1 | 4 | 90625000 | 2806 | nofs | nofs      |
| chr07 | E | 7q21.1 | 4 | 90875000 | 1606 | nofs | nofs      |
| chr07 | E | 7q21.2 | 1 | 91125000 | 3869 | fs   | fs common |

|       |   |        |   |           |       |      |           |
|-------|---|--------|---|-----------|-------|------|-----------|
| chr07 | E | 7q21.2 | 1 | 91375000  | 3343  | fs   | fs common |
| chr07 | E | 7q21.2 | 1 | 91625000  | 1671  | fs   | fs common |
| chr07 | E | 7q21.2 | 1 | 91875000  | 2411  | fs   | fs common |
| chr07 | E | 7q21.2 | 1 | 92125000  | 1594  | fs   | fs common |
| chr07 | E | 7q21.2 | 1 | 92375000  | 2991  | fs   | fs common |
| chr07 | E | 7q21.3 | 5 | 92625000  | 1440  | nofs | nofs      |
| chr07 | E | 7q21.3 | 5 | 92875000  | 2896  | nofs | nofs      |
| chr07 | E | 7q21.3 | 5 | 93125000  | 2563  | nofs | nofs      |
| chr07 | E | 7q21.3 | 5 | 93375000  | 3780  | nofs | nofs      |
| chr07 | E | 7q21.3 | 5 | 93625000  | 2762  | nofs | nofs      |
| chr07 | E | 7q21.3 | 5 | 93875000  | 2663  | nofs | nofs      |
| chr07 | E | 7q21.3 | 5 | 94125000  | 3704  | nofs | nofs      |
| chr07 | E | 7q21.3 | 5 | 94375000  | 3159  | nofs | nofs      |
| chr07 | E | 7q21.3 | 5 | 94625000  | 1667  | nofs | nofs      |
| chr07 | E | 7q21.3 | 5 | 94875000  | 2574  | nofs | nofs      |
| chr07 | E | 7q21.3 | 5 | 95125000  | 1142  | nofs | nofs      |
| chr07 | E | 7q21.3 | 5 | 95375000  | 2353  | nofs | nofs      |
| chr07 | E | 7q21.3 | 5 | 95625000  | 2931  | nofs | nofs      |
| chr07 | E | 7q21.3 | 5 | 95875000  | 1630  | nofs | nofs      |
| chr07 | E | 7q21.3 | 5 | 96125000  | 2111  | nofs | nofs      |
| chr07 | E | 7q21.3 | 5 | 96375000  | 2709  | nofs | nofs      |
| chr07 | E | 7q21.3 | 5 | 96625000  | 2357  | nofs | nofs      |
| chr07 | E | 7q21.3 | 5 | 96875000  | 3699  | nofs | nofs      |
| chr07 | E | 7q21.3 | 5 | 97125000  | 6017  | nofs | nofs      |
| chr07 | E | 7q21.3 | 5 | 97375000  | 5807  | nofs | nofs      |
| chr07 | E | 7q21.3 | 5 | 97625000  | 6041  | nofs | nofs      |
| chr07 | E | 7q22   | 6 | 97875000  | 8730  | fs   | fs common |
| chr07 | E | 7q22   | 6 | 98125000  | 7111  | fs   | fs common |
| chr07 | E | 7q22   | 6 | 98375000  | 4287  | fs   | fs common |
| chr07 | E | 7q22   | 6 | 98625000  | 3294  | fs   | fs common |
| chr07 | E | 7q22   | 6 | 98875000  | 18287 | fs   | fs common |
| chr07 | E | 7q22   | 6 | 99125000  | 11024 | fs   | fs common |
| chr07 | E | 7q22   | 6 | 99375000  | 5725  | fs   | fs common |
| chr07 | E | 7q22   | 6 | 99625000  | 4240  | fs   | fs common |
| chr07 | E | 7q22   | 6 | 99875000  | 8224  | fs   | fs common |
| chr07 | E | 7q22   | 6 | 100000000 | 8121  | fs   | fs common |

|       |   |        |   |           |       |      |           |
|-------|---|--------|---|-----------|-------|------|-----------|
| chr07 | E | 7q22   | 6 | 100000000 | 17877 | fs   | fs common |
| chr07 | E | 7q22   | 6 | 101000000 | 9094  | fs   | fs common |
| chr07 | E | 7q22   | 6 | 101000000 | 6933  | fs   | fs common |
| chr07 | E | 7q22   | 6 | 101000000 | 5561  | fs   | fs common |
| chr07 | E | 7q22   | 6 | 101000000 | 4403  | fs   | fs common |
| chr07 | E | 7q22   | 6 | 102000000 | 6485  | fs   | fs common |
| chr07 | E | 7q22   | 6 | 102000000 | 4766  | fs   | fs common |
| chr07 | E | 7q22   | 6 | 102000000 | 2199  | fs   | fs common |
| chr07 | E | 7q22   | 6 | 102000000 | 3373  | fs   | fs common |
| chr07 | E | 7q22   | 6 | 103000000 | 2138  | fs   | fs common |
| chr07 | E | 7q22   | 6 | 103000000 | 1230  | fs   | fs common |
| chr07 | E | 7q22   | 6 | 103000000 | 2990  | fs   | fs common |
| chr07 | E | 7q22   | 6 | 103000000 | 1977  | fs   | fs common |
| chr07 | E | 7q22   | 6 | 104000000 | 1863  | fs   | fs common |
| chr07 | E | 7q22   | 6 | 104000000 | 2089  | fs   | fs common |
| chr07 | E | 7q22   | 6 | 104000000 | 5258  | fs   | fs common |
| chr07 | E | 7q22   | 6 | 104000000 | 3027  | fs   | fs common |
| chr07 | E | 7q22   | 6 | 105000000 | 9235  | fs   | fs common |
| chr07 | E | 7q22   | 6 | 105000000 | 4146  | fs   | fs common |
| chr07 | E | 7q22   | 6 | 105000000 | 2273  | fs   | fs common |
| chr07 | E | 7q22   | 6 | 105000000 | 2041  | fs   | fs common |
| chr07 | E | 7q22   | 6 | 106000000 | 1421  | fs   | fs common |
| chr07 | E | 7q22   | 6 | 106000000 | 4963  | fs   | fs common |
| chr07 | E | 7q22   | 6 | 106000000 | 2656  | fs   | fs common |
| chr07 | E | 7q22   | 6 | 106000000 | 2485  | fs   | fs common |
| chr07 | E | 7q22   | 6 | 107000000 | 2517  | fs   | fs common |
| chr07 | E | 7q22   | 6 | 107000000 | 3003  | fs   | fs common |
| chr07 | E | 7q31.1 | 4 | 107000000 | 4268  | nofs | nofs      |
| chr07 | E | 7q31.1 | 4 | 107000000 | 2576  | nofs | nofs      |
| chr07 | E | 7q31.1 | 4 | 108000000 | 1578  | nofs | nofs      |
| chr07 | E | 7q31.1 | 4 | 108000000 | 2638  | nofs | nofs      |
| chr07 | E | 7q31.1 | 4 | 108000000 | 2310  | nofs | nofs      |
| chr07 | E | 7q31.1 | 4 | 108000000 | 2842  | nofs | nofs      |
| chr07 | E | 7q31.1 | 4 | 109000000 | 4205  | nofs | nofs      |
| chr07 | E | 7q31.1 | 4 | 109000000 | 3411  | nofs | nofs      |
| chr07 | E | 7q31.1 | 4 | 109000000 | 2675  | nofs | nofs      |

|       |   |        |   |           |      |           |           |
|-------|---|--------|---|-----------|------|-----------|-----------|
| chr07 | E | 7q31.1 | 4 | 109000000 | 2167 | nofs      | nofs      |
| chr07 | E | 7q31.1 | 4 | 110000000 | 3510 | nofs      | nofs      |
| chr07 | E | 7q31.1 | 4 | 110000000 | 1386 | nofs      | nofs      |
| chr07 | E | 7q31.1 | 4 | 110000000 | 1354 | nofs      | nofs      |
| chr07 | E | 7q31.1 | 4 | 110000000 | 2972 | nofs      | nofs      |
| chr07 | E | 7q31.1 | 4 | 111000000 | 2689 | nofs      | nofs      |
| chr07 | E | 7q31.1 | 4 | 111000000 | 2636 | nofs      | nofs      |
| chr07 | E | 7q31.1 | 4 | 111000000 | 2045 | nofs      | nofs      |
| chr07 | E | 7q31.1 | 4 | 111000000 | 1721 | nofs      | nofs      |
| chr07 | E | 7q31.1 | 4 | 112000000 | 2243 | nofs      | nofs      |
| chr07 | E | 7q31.1 | 4 | 112000000 | 2944 | nofs      | nofs      |
| chr07 | E | 7q31.1 | 4 | 112000000 | 4452 | nofs      | nofs      |
| chr07 | E | 7q31.1 | 4 | 112000000 | 3536 | nofs      | nofs      |
| chr07 | E | 7q31.1 | 4 | 113000000 | 1591 | nofs      | nofs      |
| chr07 | E | 7q31.1 | 4 | 113000000 | 1649 | nofs      | nofs      |
| chr07 | E | 7q31.1 | 4 | 113000000 | 2355 | nofs      | nofs      |
| chr07 | E | 7q31.1 | 4 | 113000000 | 3127 | nofs      | nofs      |
| chr07 | E | 7q31.1 | 4 | 114000000 | 3047 | nofs      | nofs      |
| chr07 | E | 7q31.1 | 4 | 114000000 | 2070 | nofs      | nofs      |
| chr07 | E | 7q31.1 | 4 | 114000000 | 1983 | nofs      | nofs      |
| chr07 | B | 7q31.2 | . | 114000000 | 2027 | fs common | fs common |
| chr07 | B | 7q31.2 | . | 115000000 | 2709 | fs common | fs common |
| chr07 | B | 7q31.2 | . | 115000000 | 3071 | fs common | fs common |
| chr07 | B | 7q31.2 | . | 115000000 | 1780 | fs common | fs common |
| chr07 | B | 7q31.2 | . | 115000000 | 2277 | fs common | fs common |
| chr07 | B | 7q31.2 | . | 116000000 | 2369 | fs common | fs common |
| chr07 | B | 7q31.2 | . | 116000000 | 3381 | fs common | fs common |
| chr07 | B | 7q31.2 | . | 116000000 | 3371 | fs common | fs common |
| chr07 | B | 7q31.2 | . | 116000000 | 2537 | fs common | fs common |
| chr07 | B | 7q31.2 | . | 117000000 | 1491 | fs common | fs common |
| chr07 | B | 7q31.2 | . | 117000000 | 2243 | fs common | fs common |
| chr07 | B | 7q31.2 | . | 117000000 | 1744 | fs common | fs common |
| chr07 | E | 7q31.3 | 1 | 117000000 | 2155 | nofs      | nofs      |
| chr07 | E | 7q31.3 | 1 | 118000000 | 2347 | nofs      | nofs      |
| chr07 | E | 7q31.3 | 1 | 118000000 | 2004 | nofs      | nofs      |
| chr07 | E | 7q31.3 | 1 | 118000000 | 3228 | nofs      | nofs      |

|       |   |        |   |           |      |      |      |
|-------|---|--------|---|-----------|------|------|------|
| chr07 | E | 7q31.3 | 1 | 118000000 | 2177 | nofs | nofs |
| chr07 | E | 7q31.3 | 1 | 119000000 | 2927 | nofs | nofs |
| chr07 | E | 7q31.3 | 1 | 119000000 | 1772 | nofs | nofs |
| chr07 | E | 7q31.3 | 1 | 119000000 | 2505 | nofs | nofs |
| chr07 | E | 7q31.3 | 1 | 119000000 | 2129 | nofs | nofs |
| chr07 | E | 7q31.3 | 1 | 120000000 | 2199 | nofs | nofs |
| chr07 | E | 7q31.3 | 1 | 120000000 | 2417 | nofs | nofs |
| chr07 | E | 7q31.3 | 1 | 120000000 | 2123 | nofs | nofs |
| chr07 | E | 7q31.3 | 1 | 120000000 | 1695 | nofs | nofs |
| chr07 | E | 7q31.3 | 1 | 121000000 | 4258 | nofs | nofs |
| chr07 | E | 7q31.3 | 1 | 121000000 | 3721 | nofs | nofs |
| chr07 | E | 7q31.3 | 1 | 121000000 | 2785 | nofs | nofs |
| chr07 | E | 7q31.3 | 1 | 121000000 | 2680 | nofs | nofs |
| chr07 | E | 7q31.3 | 1 | 122000000 | 3934 | nofs | nofs |
| chr07 | E | 7q31.3 | 1 | 122000000 | 3858 | nofs | nofs |
| chr07 | E | 7q31.3 | 1 | 122000000 | 2356 | nofs | nofs |
| chr07 | E | 7q31.3 | 1 | 122000000 | 4308 | nofs | nofs |
| chr07 | E | 7q31.3 | 1 | 123000000 | 1443 | nofs | nofs |
| chr07 | E | 7q31.3 | 1 | 123000000 | 3685 | nofs | nofs |
| chr07 | E | 7q31.3 | 1 | 123000000 | 1935 | nofs | nofs |
| chr07 | E | 7q31.3 | 1 | 123000000 | 2133 | nofs | nofs |
| chr07 | E | 7q31.3 | 1 | 124000000 | 1960 | nofs | nofs |
| chr07 | E | 7q31.3 | 1 | 124000000 | 3055 | nofs | nofs |
| chr07 | E | 7q31.3 | 1 | 124000000 | 1959 | nofs | nofs |
| chr07 | E | 7q31.3 | 1 | 124000000 | 2260 | nofs | nofs |
| chr07 | E | 7q31.3 | 1 | 125000000 | 3595 | nofs | nofs |
| chr07 | E | 7q31.3 | 1 | 125000000 | 3358 | nofs | nofs |
| chr07 | E | 7q31.3 | 1 | 125000000 | 2688 | nofs | nofs |
| chr07 | E | 7q31.3 | 1 | 125000000 | 3001 | nofs | nofs |
| chr07 | E | 7q31.3 | 1 | 126000000 | 2995 | nofs | nofs |
| chr07 | E | 7q31.3 | 1 | 126000000 | 1812 | nofs | nofs |
| chr07 | E | 7q32   | 1 | 126000000 | 2080 | nofs | nofs |
| chr07 | E | 7q32   | 1 | 126000000 | 2653 | nofs | nofs |
| chr07 | E | 7q32   | 1 | 127000000 | 2019 | nofs | nofs |
| chr07 | E | 7q32   | 1 | 127000000 | 3126 | nofs | nofs |
| chr07 | E | 7q32   | 1 | 127000000 | 1681 | nofs | nofs |

|       |   |      |   |           |      |      |           |
|-------|---|------|---|-----------|------|------|-----------|
| chr07 | E | 7q32 | 1 | 127000000 | 3458 | nofs | nofs      |
| chr07 | E | 7q32 | 1 | 128000000 | 3906 | nofs | nofs      |
| chr07 | E | 7q32 | 1 | 128000000 | 4667 | nofs | nofs      |
| chr07 | E | 7q32 | 1 | 128000000 | 2588 | nofs | nofs      |
| chr07 | E | 7q32 | 1 | 128000000 | 3275 | nofs | nofs      |
| chr07 | E | 7q32 | 1 | 129000000 | 3166 | nofs | nofs      |
| chr07 | E | 7q32 | 1 | 129000000 | 2452 | nofs | nofs      |
| chr07 | E | 7q32 | 1 | 129000000 | 4654 | nofs | nofs      |
| chr07 | E | 7q32 | 1 | 129000000 | 3800 | nofs | nofs      |
| chr07 | E | 7q32 | 1 | 130000000 | 2620 | nofs | nofs      |
| chr07 | E | 7q32 | 1 | 130000000 | 2118 | fs   | fs common |
| chr07 | E | 7q32 | 1 | 130000000 | 3287 | fs   | fs common |
| chr07 | E | 7q32 | 1 | 130000000 | 3381 | fs   | fs common |
| chr07 | E | 7q32 | 1 | 131000000 | 3133 | fs   | fs common |
| chr07 | E | 7q32 | 1 | 131000000 | 5004 | fs   | fs common |
| chr07 | E | 7q32 | 1 | 131000000 | 5446 | fs   | fs common |
| chr07 | E | 7q32 | 1 | 131000000 | 3955 | fs   | fs common |
| chr07 | E | 7q32 | 1 | 132000000 | 5534 | fs   | fs common |
| chr07 | E | 7q32 | 1 | 132000000 | 3706 | fs   | fs common |
| chr07 | E | 7q33 | 2 | 132000000 | 3290 | nofs | nofs      |
| chr07 | E | 7q33 | 2 | 132000000 | 2448 | nofs | nofs      |
| chr07 | E | 7q33 | 2 | 133000000 | 1345 | nofs | nofs      |
| chr07 | E | 7q33 | 2 | 133000000 | 2554 | nofs | nofs      |
| chr07 | E | 7q33 | 2 | 133000000 | 2263 | nofs | nofs      |
| chr07 | E | 7q33 | 2 | 133000000 | 2649 | nofs | nofs      |
| chr07 | E | 7q33 | 2 | 134000000 | 2748 | nofs | nofs      |
| chr07 | E | 7q33 | 2 | 134000000 | 2455 | nofs | nofs      |
| chr07 | E | 7q33 | 2 | 134000000 | 2145 | nofs | nofs      |
| chr07 | E | 7q33 | 2 | 134000000 | 2561 | nofs | nofs      |
| chr07 | E | 7q33 | 2 | 135000000 | 3939 | nofs | nofs      |
| chr07 | E | 7q33 | 2 | 135000000 | 3962 | nofs | nofs      |
| chr07 | E | 7q33 | 2 | 135000000 | 3445 | nofs | nofs      |
| chr07 | E | 7q33 | 2 | 135000000 | 3232 | nofs | nofs      |
| chr07 | E | 7q33 | 2 | 136000000 | 2966 | nofs | nofs      |
| chr07 | E | 7q33 | 2 | 136000000 | 2613 | nofs | nofs      |
| chr07 | E | 7q33 | 2 | 136000000 | 4111 | nofs | nofs      |



|       |   |      |   |           |      |      |      |
|-------|---|------|---|-----------|------|------|------|
| chr07 | E | 7q33 | 2 | 136000000 | 3094 | nofs | nofs |
| chr07 | E | 7q33 | 2 | 137000000 | 2717 | nofs | nofs |
| chr07 | E | 7q33 | 2 | 137000000 | 2290 | nofs | nofs |
| chr07 | E | 7q34 | 3 | 137000000 | 3187 | nofs | nofs |
| chr07 | E | 7q34 | 3 | 137000000 | 4983 | nofs | nofs |
| chr07 | E | 7q34 | 3 | 138000000 | 3694 | nofs | nofs |
| chr07 | E | 7q34 | 3 | 138000000 | 5090 | nofs | nofs |
| chr07 | E | 7q34 | 3 | 138000000 | 3402 | nofs | nofs |
| chr07 | E | 7q34 | 3 | 138000000 | 3735 | nofs | nofs |
| chr07 | E | 7q34 | 3 | 139000000 | 5549 | nofs | nofs |
| chr07 | E | 7q34 | 3 | 139000000 | 1991 | nofs | nofs |
| chr07 | E | 7q34 | 3 | 139000000 | 4187 | nofs | nofs |
| chr07 | E | 7q34 | 3 | 139000000 | 4691 | nofs | nofs |
| chr07 | E | 7q34 | 3 | 140000000 | 5191 | nofs | nofs |
| chr07 | E | 7q34 | 3 | 140000000 | 2601 | nofs | nofs |
| chr07 | E | 7q34 | 3 | 140000000 | 3065 | nofs | nofs |
| chr07 | E | 7q34 | 3 | 140000000 | 2478 | nofs | nofs |
| chr07 | E | 7q34 | 3 | 141000000 | 2546 | nofs | nofs |
| chr07 | E | 7q34 | 3 | 141000000 | 2220 | nofs | nofs |
| chr07 | E | 7q34 | 3 | 141000000 | 6825 | nofs | nofs |
| chr07 | E | 7q34 | 3 | 141000000 | 3608 | nofs | nofs |
| chr07 | E | 7q34 | 3 | 142000000 | 2316 | nofs | nofs |
| chr07 | E | 7q34 | 3 | 142000000 | 1685 | nofs | nofs |
| chr07 | E | 7q34 | 3 | 142000000 | 4380 | nofs | nofs |
| chr07 | E | 7q34 | 3 | 142000000 | 3104 | nofs | nofs |
| chr07 | E | 7q34 | 3 | 143000000 | 3210 | nofs | nofs |
| chr07 | E | 7q34 | 3 | 143000000 | 1944 | nofs | nofs |
| chr07 | E | 7q35 | 2 | 143000000 | 3158 | nofs | nofs |
| chr07 | E | 7q35 | 2 | 143000000 | 2757 | nofs | nofs |
| chr07 | E | 7q35 | 2 | 144000000 | 2263 | nofs | nofs |
| chr07 | E | 7q35 | 2 | 144000000 | 3916 | nofs | nofs |
| chr07 | E | 7q35 | 2 | 144000000 | 3682 | nofs | nofs |
| chr07 | E | 7q35 | 2 | 144000000 | 4290 | nofs | nofs |
| chr07 | E | 7q35 | 2 | 145000000 | 1338 | nofs | nofs |
| chr07 | E | 7q35 | 2 | 145000000 | 3135 | nofs | nofs |
| chr07 | E | 7q35 | 2 | 145000000 | 2900 | nofs | nofs |

|       |   |      |   |           |       |      |           |
|-------|---|------|---|-----------|-------|------|-----------|
| chr07 | E | 7q35 | 2 | 145000000 | 3541  | nofs | nofs      |
| chr07 | E | 7q35 | 2 | 146000000 | 3404  | nofs | nofs      |
| chr07 | E | 7q35 | 2 | 146000000 | 5236  | nofs | nofs      |
| chr07 | E | 7q35 | 2 | 146000000 | 3980  | nofs | nofs      |
| chr07 | E | 7q35 | 2 | 146000000 | 3564  | nofs | nofs      |
| chr07 | E | 7q35 | 2 | 147000000 | 2866  | nofs | nofs      |
| chr07 | E | 7q35 | 2 | 147000000 | 1910  | nofs | nofs      |
| chr07 | E | 7q35 | 2 | 147000000 | 2331  | nofs | nofs      |
| chr07 | E | 7q35 | 2 | 147000000 | 4779  | nofs | nofs      |
| chr07 | E | 7q36 | 5 | 148000000 | 4633  | fs   | fs common |
| chr07 | E | 7q36 | 5 | 148000000 | 3376  | fs   | fs common |
| chr07 | E | 7q36 | 5 | 148000000 | 4949  | fs   | fs common |
| chr07 | E | 7q36 | 5 | 148000000 | 3757  | fs   | fs common |
| chr07 | E | 7q36 | 5 | 149000000 | 4139  | fs   | fs common |
| chr07 | E | 7q36 | 5 | 149000000 | 4511  | fs   | fs common |
| chr07 | E | 7q36 | 5 | 149000000 | 9998  | fs   | fs common |
| chr07 | E | 7q36 | 5 | 149000000 | 4706  | fs   | fs common |
| chr07 | E | 7q36 | 5 | 150000000 | 3068  | fs   | fs common |
| chr07 | E | 7q36 | 5 | 150000000 | 2840  | fs   | fs common |
| chr07 | E | 7q36 | 5 | 150000000 | 5582  | fs   | fs common |
| chr07 | E | 7q36 | 5 | 150000000 | 4127  | fs   | fs common |
| chr07 | E | 7q36 | 5 | 151000000 | 4404  | fs   | fs common |
| chr07 | E | 7q36 | 5 | 151000000 | 7308  | fs   | fs common |
| chr07 | E | 7q36 | 5 | 151000000 | 5092  | fs   | fs common |
| chr07 | E | 7q36 | 5 | 151000000 | 3543  | fs   | fs common |
| chr07 | E | 7q36 | 5 | 152000000 | 7146  | fs   | fs common |
| chr07 | E | 7q36 | 5 | 152000000 | 5035  | fs   | fs common |
| chr07 | E | 7q36 | 5 | 152000000 | 7199  | fs   | fs common |
| chr07 | E | 7q36 | 5 | 152000000 | 3836  | fs   | fs common |
| chr07 | E | 7q36 | 5 | 153000000 | 3439  | fs   | fs common |
| chr07 | E | 7q36 | 5 | 153000000 | 4187  | fs   | fs common |
| chr07 | E | 7q36 | 5 | 153000000 | 7703  | fs   | fs common |
| chr07 | E | 7q36 | 5 | 153000000 | 6787  | fs   | fs common |
| chr07 | E | 7q36 | 5 | 154000000 | 1860  | fs   | fs common |
| chr07 | E | 7q36 | 5 | 154000000 | 10581 | fs   | fs common |
| chr07 | E | 7q36 | 5 | 154000000 | 7076  | fs   | fs common |

|       |   |        |   |           |       |      |           |
|-------|---|--------|---|-----------|-------|------|-----------|
| chr07 | E | 7q36   | 5 | 154000000 | 9471  | fs   | fs common |
| chr07 | E | 7q36   | 5 | 155000000 | 13700 | fs   | fs common |
| chr07 | E | 7q36   | 5 | 155000000 | 7928  | fs   | fs common |
| chr07 | E | 7q36   | 5 | 155000000 | 10793 | fs   | fs common |
| chr07 | T | 7q36   | 5 | 155000000 | 12313 | fs   | fs common |
| chr07 | T | 7q36   | 5 | 156000000 | 9073  | fs   | fs common |
| chr07 | T | 7q36   | 5 | 156000000 | 6924  | fs   | fs common |
| chr07 | T | 7q36   | 5 | 156000000 | 3883  | fs   | fs common |
| chr07 | T | 7q36   | 5 | 156000000 | 5788  | fs   | fs common |
| chr07 | T | 7q36   | 5 | 157000000 | 10219 | fs   | fs common |
| chr07 | T | 7q36   | 5 | 157000000 | 27977 | fs   | fs common |
| chr07 | T | 7q36   | 5 | 157000000 | 49788 | fs   | fs common |
| chr07 | T | 7q36   | 5 | 157000000 | 38602 | fs   | fs common |
| chr07 | T | 7q36   | 5 | 158000000 | 49864 | fs   | fs common |
| chr07 | T | 7q36   | 5 | 158000000 | 21711 | fs   | fs common |
| chr07 | T | 7q36   | 5 | 158000000 | 19432 | fs   | fs common |
| chr07 | T | 7q36   | 5 | 158000000 | 29421 | fs   | fs common |
| chr08 | T | 8p23.3 | 1 | 125000    | 19177 | nofs | nofs      |
| chr08 | T | 8p23.3 | 1 | 375000    | 10501 | nofs | nofs      |
| chr08 | T | 8p23.3 | 1 | 625000    | 25187 | nofs | nofs      |
| chr08 | T | 8p23.3 | 1 | 875000    | 32777 | nofs | nofs      |
| chr08 | T | 8p23.3 | 1 | 1125000   | 35217 | nofs | nofs      |
| chr08 | T | 8p23.3 | 1 | 1375000   | 49944 | nofs | nofs      |
| chr08 | T | 8p23.3 | 1 | 1625000   | 23510 | nofs | nofs      |
| chr08 | T | 8p23.3 | 1 | 1875000   | 25550 | nofs | nofs      |
| chr08 | T | 8p23.3 | 1 | 2125000   | 14446 | nofs | nofs      |
| chr08 | T | 8p23.3 | 1 | 2375000   | 7763  | nofs | nofs      |
| chr08 | T | 8p23.2 | . | 2625000   | 6046  | nofs | nofs      |
| chr08 | T | 8p23.2 | . | 2875000   | 7006  | nofs | nofs      |
| chr08 | T | 8p23.2 | . | 3125000   | 7187  | nofs | nofs      |
| chr08 | B | 8p23.2 | . | 3375000   | 7365  | nofs | nofs      |
| chr08 | B | 8p23.2 | . | 3625000   | 7929  | nofs | nofs      |
| chr08 | B | 8p23.2 | . | 3875000   | 3782  | nofs | nofs      |
| chr08 | B | 8p23.2 | . | 4125000   | 4064  | nofs | nofs      |
| chr08 | B | 8p23.2 | . | 4375000   | 4351  | nofs | nofs      |
| chr08 | B | 8p23.2 | . | 4625000   | 3263  | nofs | nofs      |

|       |   |        |   |          |      |      |      |
|-------|---|--------|---|----------|------|------|------|
| chr08 | B | 8p23.2 | . | 4875000  | 3988 | nofs | nofs |
| chr08 | B | 8p23.2 | . | 5125000  | 3695 | nofs | nofs |
| chr08 | B | 8p23.2 | . | 5375000  | 2207 | nofs | nofs |
| chr08 | B | 8p23.2 | . | 5625000  | 2485 | nofs | nofs |
| chr08 | B | 8p23.2 | . | 5875000  | 6514 | nofs | nofs |
| chr08 | E | 8p23.1 | 5 | 6125000  | 6123 | nofs | nofs |
| chr08 | E | 8p23.1 | 5 | 6375000  | 5828 | nofs | nofs |
| chr08 | E | 8p23.1 | 5 | 6625000  | 4598 | nofs | nofs |
| chr08 | E | 8p23.1 | 5 | 6875000  | 4465 | nofs | nofs |
| chr08 | E | 8p23.1 | 5 | 7125000  | 2143 | nofs | nofs |
| chr08 | E | 8p23.1 | 5 | 7375000  | 2242 | nofs | nofs |
| chr08 | E | 8p23.1 | 5 | 7625000  | 2130 | nofs | nofs |
| chr08 | E | 8p23.1 | 5 | 7875000  | 2723 | nofs | nofs |
| chr08 | E | 8p23.1 | 5 | 8125000  | 2921 | nofs | nofs |
| chr08 | E | 8p23.1 | 5 | 8375000  | 2912 | nofs | nofs |
| chr08 | E | 8p23.1 | 5 | 8625000  | 4671 | nofs | nofs |
| chr08 | E | 8p23.1 | 5 | 8875000  | 2312 | nofs | nofs |
| chr08 | E | 8p23.1 | 5 | 9125000  | 3408 | nofs | nofs |
| chr08 | E | 8p23.1 | 5 | 9375000  | 2692 | nofs | nofs |
| chr08 | E | 8p23.1 | 5 | 9625000  | 5425 | nofs | nofs |
| chr08 | E | 8p23.1 | 5 | 9875000  | 3063 | nofs | nofs |
| chr08 | E | 8p23.1 | 5 | 10125000 | 1644 | nofs | nofs |
| chr08 | E | 8p23.1 | 5 | 10375000 | 2915 | nofs | nofs |
| chr08 | E | 8p23.1 | 5 | 10625000 | 7866 | nofs | nofs |
| chr08 | E | 8p23.1 | 5 | 10875000 | 3839 | nofs | nofs |
| chr08 | E | 8p23.1 | 5 | 11125000 | 3486 | nofs | nofs |
| chr08 | E | 8p23.1 | 5 | 11375000 | 4917 | nofs | nofs |
| chr08 | E | 8p23.1 | 5 | 11625000 | 3160 | nofs | nofs |
| chr08 | E | 8p23.1 | 5 | 11875000 | 6066 | nofs | nofs |
| chr08 | E | 8p23.1 | 5 | 12125000 | 1791 | nofs | nofs |
| chr08 | E | 8p23.1 | 5 | 12375000 | 4829 | nofs | nofs |
| chr08 | E | 8p23.1 | 5 | 12625000 | 4807 | nofs | nofs |
| chr08 | E | 8p22   | 5 | 12875000 | 4446 | nofs | nofs |
| chr08 | E | 8p22   | 5 | 13125000 | 3637 | nofs | nofs |
| chr08 | E | 8p22   | 5 | 13375000 | 2896 | nofs | nofs |
| chr08 | E | 8p22   | 5 | 13625000 | 2472 | nofs | nofs |

|       |   |        |   |          |      |      |      |
|-------|---|--------|---|----------|------|------|------|
| chr08 | E | 8p22   | 5 | 13875000 | 2291 | nofs | nofs |
| chr08 | E | 8p22   | 5 | 14125000 | 2494 | nofs | nofs |
| chr08 | E | 8p22   | 5 | 14375000 | 2205 | nofs | nofs |
| chr08 | E | 8p22   | 5 | 14625000 | 2692 | nofs | nofs |
| chr08 | E | 8p22   | 5 | 14875000 | 4683 | nofs | nofs |
| chr08 | E | 8p22   | 5 | 15125000 | 1457 | nofs | nofs |
| chr08 | E | 8p22   | 5 | 15375000 | 3841 | nofs | nofs |
| chr08 | E | 8p22   | 5 | 15625000 | 2056 | nofs | nofs |
| chr08 | E | 8p22   | 5 | 15875000 | 3519 | nofs | nofs |
| chr08 | E | 8p22   | 5 | 16125000 | 4026 | nofs | nofs |
| chr08 | E | 8p22   | 5 | 16375000 | 2873 | nofs | nofs |
| chr08 | E | 8p22   | 5 | 16625000 | 4425 | nofs | nofs |
| chr08 | E | 8p22   | 5 | 16875000 | 1890 | nofs | nofs |
| chr08 | E | 8p22   | 5 | 17125000 | 1681 | nofs | nofs |
| chr08 | E | 8p22   | 5 | 17375000 | 2582 | nofs | nofs |
| chr08 | E | 8p22   | 5 | 17625000 | 2810 | nofs | nofs |
| chr08 | E | 8p22   | 5 | 17875000 | 4319 | nofs | nofs |
| chr08 | E | 8p22   | 5 | 18125000 | 2102 | nofs | nofs |
| chr08 | E | 8p22   | 5 | 18375000 | 2202 | nofs | nofs |
| chr08 | E | 8p22   | 5 | 18625000 | 2071 | nofs | nofs |
| chr08 | E | 8p22   | 5 | 18875000 | 2089 | nofs | nofs |
| chr08 | E | 8p21.3 | 5 | 19125000 | 4601 | nofs | nofs |
| chr08 | E | 8p21.3 | 5 | 19375000 | 3893 | nofs | nofs |
| chr08 | E | 8p21.3 | 5 | 19625000 | 2442 | nofs | nofs |
| chr08 | E | 8p21.3 | 5 | 19875000 | 2752 | nofs | nofs |
| chr08 | E | 8p21.3 | 5 | 20125000 | 3337 | nofs | nofs |
| chr08 | E | 8p21.3 | 5 | 20375000 | 4591 | nofs | nofs |
| chr08 | E | 8p21.3 | 5 | 20625000 | 2013 | nofs | nofs |
| chr08 | E | 8p21.3 | 5 | 20875000 | 4077 | nofs | nofs |
| chr08 | E | 8p21.3 | 5 | 21125000 | 6959 | nofs | nofs |
| chr08 | E | 8p21.3 | 5 | 21375000 | 2661 | nofs | nofs |
| chr08 | E | 8p21.3 | 5 | 21625000 | 4007 | nofs | nofs |
| chr08 | E | 8p21.3 | 5 | 21875000 | 3357 | nofs | nofs |
| chr08 | E | 8p21.3 | 5 | 22125000 | 2791 | nofs | nofs |
| chr08 | E | 8p21.3 | 5 | 22375000 | 3634 | nofs | nofs |
| chr08 | E | 8p21.3 | 5 | 22625000 | 4556 | nofs | nofs |

|       |   |        |   |          |       |      |      |
|-------|---|--------|---|----------|-------|------|------|
| chr08 | E | 8p21.3 | 5 | 22875000 | 2491  | nofs | nofs |
| chr08 | E | 8p21.3 | 5 | 23125000 | 3948  | nofs | nofs |
| chr08 | E | 8p21.3 | 5 | 23375000 | 3193  | nofs | nofs |
| chr08 | E | 8p21.2 | 2 | 23625000 | 2689  | nofs | nofs |
| chr08 | E | 8p21.2 | 2 | 23875000 | 3470  | nofs | nofs |
| chr08 | E | 8p21.2 | 2 | 24125000 | 1595  | nofs | nofs |
| chr08 | E | 8p21.2 | 2 | 24375000 | 2431  | nofs | nofs |
| chr08 | E | 8p21.2 | 2 | 24625000 | 2166  | nofs | nofs |
| chr08 | E | 8p21.2 | 2 | 24875000 | 3196  | nofs | nofs |
| chr08 | E | 8p21.2 | 2 | 25125000 | 6408  | nofs | nofs |
| chr08 | E | 8p21.2 | 2 | 25375000 | 3278  | nofs | nofs |
| chr08 | E | 8p21.2 | 2 | 25625000 | 2707  | nofs | nofs |
| chr08 | E | 8p21.2 | 2 | 25875000 | 2385  | nofs | nofs |
| chr08 | E | 8p21.2 | 2 | 26125000 | 4648  | nofs | nofs |
| chr08 | E | 8p21.2 | 2 | 26375000 | 3748  | nofs | nofs |
| chr08 | E | 8p21.2 | 2 | 26625000 | 2985  | nofs | nofs |
| chr08 | E | 8p21.2 | 2 | 26875000 | 1613  | nofs | nofs |
| chr08 | E | 8p21.2 | 2 | 27125000 | 3524  | nofs | nofs |
| chr08 | E | 8p21.2 | 2 | 27375000 | 3456  | nofs | nofs |
| chr08 | E | 8p21.1 | 3 | 27625000 | 3085  | nofs | nofs |
| chr08 | E | 8p21.1 | 3 | 27875000 | 4299  | nofs | nofs |
| chr08 | E | 8p21.1 | 3 | 28125000 | 2335  | nofs | nofs |
| chr08 | E | 8p21.1 | 3 | 28375000 | 2693  | nofs | nofs |
| chr08 | E | 8p21.1 | 3 | 28625000 | 2007  | nofs | nofs |
| chr08 | E | 8p21.1 | 3 | 28875000 | 2453  | nofs | nofs |
| chr08 | E | 8p12   | 5 | 29125000 | 15660 | nofs | nofs |
| chr08 | E | 8p12   | 5 | 29375000 | 3050  | nofs | nofs |
| chr08 | E | 8p12   | 5 | 29625000 | 4108  | nofs | nofs |
| chr08 | E | 8p12   | 5 | 29875000 | 1788  | nofs | nofs |
| chr08 | E | 8p12   | 5 | 30125000 | 5882  | nofs | nofs |
| chr08 | E | 8p12   | 5 | 30375000 | 3478  | nofs | nofs |
| chr08 | E | 8p12   | 5 | 30625000 | 4594  | nofs | nofs |
| chr08 | E | 8p12   | 5 | 30875000 | 3953  | nofs | nofs |
| chr08 | E | 8p12   | 5 | 31125000 | 1900  | nofs | nofs |
| chr08 | E | 8p12   | 5 | 31375000 | 2243  | nofs | nofs |
| chr08 | E | 8p12   | 5 | 31625000 | 1615  | nofs | nofs |

|       |   |        |   |          |      |      |      |
|-------|---|--------|---|----------|------|------|------|
| chr08 | E | 8p12   | 5 | 31875000 | 1824 | nofs | nofs |
| chr08 | E | 8p12   | 5 | 32125000 | 2491 | nofs | nofs |
| chr08 | E | 8p12   | 5 | 32375000 | 2993 | nofs | nofs |
| chr08 | E | 8p12   | 5 | 32625000 | 2155 | nofs | nofs |
| chr08 | E | 8p12   | 5 | 32875000 | 1148 | nofs | nofs |
| chr08 | E | 8p12   | 5 | 33125000 | 1689 | nofs | nofs |
| chr08 | E | 8p12   | 5 | 33375000 | 5315 | nofs | nofs |
| chr08 | E | 8p12   | 5 | 33625000 | 5049 | nofs | nofs |
| chr08 | E | 8p12   | 5 | 33875000 | 2286 | nofs | nofs |
| chr08 | E | 8p12   | 5 | 34125000 | 2260 | nofs | nofs |
| chr08 | E | 8p12   | 5 | 34375000 | 2577 | nofs | nofs |
| chr08 | E | 8p12   | 5 | 34625000 | 4096 | nofs | nofs |
| chr08 | E | 8p12   | 5 | 34875000 | 3330 | nofs | nofs |
| chr08 | E | 8p12   | 5 | 35125000 | 5062 | nofs | nofs |
| chr08 | E | 8p12   | 5 | 35375000 | 2143 | nofs | nofs |
| chr08 | E | 8p12   | 5 | 35625000 | 1826 | nofs | nofs |
| chr08 | E | 8p12   | 5 | 35875000 | 2564 | nofs | nofs |
| chr08 | E | 8p12   | 5 | 36125000 | 2850 | nofs | nofs |
| chr08 | E | 8p12   | 5 | 36375000 | 3185 | nofs | nofs |
| chr08 | E | 8p12   | 5 | 36625000 | 2700 | nofs | nofs |
| chr08 | E | 8p12   | 5 | 36875000 | 2835 | nofs | nofs |
| chr08 | E | 8p12   | 5 | 37125000 | 2463 | nofs | nofs |
| chr08 | E | 8p12   | 5 | 37375000 | 5597 | nofs | nofs |
| chr08 | E | 8p12   | 5 | 37625000 | 4302 | nofs | nofs |
| chr08 | E | 8p12   | 5 | 37875000 | 5975 | nofs | nofs |
| chr08 | E | 8p12   | 5 | 38125000 | 5116 | nofs | nofs |
| chr08 | E | 8p12   | 5 | 38375000 | 3815 | nofs | nofs |
| chr08 | E | 8p11.2 | 1 | 38625000 | 5009 | nofs | nofs |
| chr08 | E | 8p11.2 | 1 | 38875000 | 3685 | nofs | nofs |
| chr08 | E | 8p11.2 | 1 | 39125000 | 3008 | nofs | nofs |
| chr08 | E | 8p11.2 | 1 | 39375000 | 4310 | nofs | nofs |
| chr08 | E | 8p11.2 | 1 | 39625000 | 2561 | nofs | nofs |
| chr08 | E | 8p11.2 | 1 | 39875000 | 3132 | nofs | nofs |
| chr08 | E | 8p11.2 | 1 | 40125000 | 3319 | nofs | nofs |
| chr08 | E | 8p11.2 | 1 | 40375000 | 2665 | nofs | nofs |
| chr08 | E | 8p11.2 | 1 | 40625000 | 2451 | nofs | nofs |

|       |   |         |   |          |        |      |      |
|-------|---|---------|---|----------|--------|------|------|
| chr08 | E | 8p11.2  | 1 | 40875000 | 4802   | nofs | nofs |
| chr08 | C | 8p11.2  | 1 | 41125000 | 3438   | nofs | nofs |
| chr08 | C | 8p11.2  | 1 | 41375000 | 3337   | nofs | nofs |
| chr08 | C | 8p11.2  | 1 | 41625000 | 4649   | nofs | nofs |
| chr08 | C | 8p11.2  | 1 | 41875000 | 3091   | nofs | nofs |
| chr08 | C | 8p11.2  | 1 | 42125000 | 4694   | nofs | nofs |
| chr08 | C | 8p11.2  | 1 | 42375000 | 3967   | nofs | nofs |
| chr08 | C | 8p11.2  | 1 | 42625000 | 4651   | nofs | nofs |
| chr08 | C | 8p11.1  | . | 42875000 | 4484   | nofs | nofs |
| chr08 | C | 8p11.1  | . | 43125000 | 9288   | nofs | nofs |
| chr08 | C | 8p11.1  | . | 43125000 | 9288   | nofs | nofs |
| chr08 | C | 8p11.1  | . | 43375000 | 2184   | nofs | nofs |
| chr08 | C | 8p11.1  | . | 43625000 | 160901 | nofs | nofs |
| chr08 | C | 8p11.1  | . | 43875000 | 170122 | nofs | nofs |
| chr08 | C |         | . | 44125000 | 0      | nofs | nofs |
| chr08 | C |         | . | 44375000 | 0      | nofs | nofs |
| chr08 | C |         | . | 44625000 | 0      | nofs | nofs |
| chr08 | C |         | . | 44875000 | 0      | nofs | nofs |
| chr08 | C |         | . | 45125000 | 0      | nofs | nofs |
| chr08 | C |         | . | 45375000 | 0      | nofs | nofs |
| chr08 | C |         | . | 45625000 | 0      | nofs | nofs |
| chr08 | C |         | . | 45875000 | 0      | nofs | nofs |
| chr08 | C |         | . | 46125000 | 0      | nofs | nofs |
| chr08 | C |         | . | 46375000 | 0      | nofs | nofs |
| chr08 | C |         | . | 46625000 | 0      | nofs | nofs |
| chr08 | C | 8q11.1  | . | 46875000 | 39220  | nofs | nofs |
| chr08 | C | 8q11.1  | . | 47125000 | 96603  | nofs | nofs |
| chr08 | C | 8q11.1  | . | 47375000 | 98378  | nofs | nofs |
| chr08 | C | 8q11.1  | . | 47625000 | 58806  | nofs | nofs |
| chr08 | C | 8q11.1  | . | 47875000 | 3018   | nofs | nofs |
| chr08 | C | 8q11.1  | . | 48125000 | 3864   | nofs | nofs |
| chr08 | C | 8q11.21 | 3 | 48375000 | 1962   | nofs | nofs |
| chr08 | C | 8q11.21 | 3 | 48625000 | 1903   | nofs | nofs |
| chr08 | C | 8q11.21 | 3 | 48875000 | 3782   | nofs | nofs |
| chr08 | C | 8q11.21 | 3 | 49125000 | 4774   | nofs | nofs |
| chr08 | C | 8q11.21 | 3 | 49375000 | 3258   | nofs | nofs |



|       |   |         |   |          |      |      |      |
|-------|---|---------|---|----------|------|------|------|
| chr08 | C | 8q11.21 | 3 | 49625000 | 1304 | nofs | nofs |
| chr08 | C | 8q11.21 | 3 | 49875000 | 3666 | nofs | nofs |
| chr08 | E | 8q11.21 | 3 | 50125000 | 3668 | nofs | nofs |
| chr08 | E | 8q11.21 | 3 | 50375000 | 3629 | nofs | nofs |
| chr08 | E | 8q11.21 | 3 | 50625000 | 4021 | nofs | nofs |
| chr08 | E | 8q11.21 | 3 | 50875000 | 3082 | nofs | nofs |
| chr08 | E | 8q11.21 | 3 | 51125000 | 1972 | nofs | nofs |
| chr08 | E | 8q11.21 | 3 | 51375000 | 2156 | nofs | nofs |
| chr08 | E | 8q11.21 | 3 | 51625000 | 3129 | nofs | nofs |
| chr08 | E | 8q11.21 | 3 | 51875000 | 2098 | nofs | nofs |
| chr08 | E | 8q11.21 | 3 | 52125000 | 3433 | nofs | nofs |
| chr08 | E | 8q11.21 | 3 | 52375000 | 4438 | nofs | nofs |
| chr08 | B | 8q11.22 | . | 52625000 | 5375 | nofs | nofs |
| chr08 | E | 8q11.23 | 1 | 52875000 | 4173 | nofs | nofs |
| chr08 | E | 8q11.23 | 1 | 53125000 | 1951 | nofs | nofs |
| chr08 | E | 8q11.23 | 1 | 53375000 | 1677 | nofs | nofs |
| chr08 | E | 8q11.23 | 1 | 53625000 | 4115 | nofs | nofs |
| chr08 | E | 8q11.23 | 1 | 53875000 | 2655 | nofs | nofs |
| chr08 | E | 8q11.23 | 1 | 54125000 | 3608 | nofs | nofs |
| chr08 | E | 8q11.23 | 1 | 54375000 | 2435 | nofs | nofs |
| chr08 | E | 8q11.23 | 1 | 54625000 | 4058 | nofs | nofs |
| chr08 | E | 8q11.23 | 1 | 54875000 | 1887 | nofs | nofs |
| chr08 | E | 8q11.23 | 1 | 55125000 | 6563 | nofs | nofs |
| chr08 | E | 8q11.23 | 1 | 55375000 | 2244 | nofs | nofs |
| chr08 | E | 8q11.23 | 1 | 55625000 | 3882 | nofs | nofs |
| chr08 | E | 8q12    | 3 | 55875000 | 3823 | nofs | nofs |
| chr08 | E | 8q12    | 3 | 56125000 | 1870 | nofs | nofs |
| chr08 | E | 8q12    | 3 | 56375000 | 1779 | nofs | nofs |
| chr08 | E | 8q12    | 3 | 56625000 | 3047 | nofs | nofs |
| chr08 | E | 8q12    | 3 | 56875000 | 4395 | nofs | nofs |
| chr08 | E | 8q12    | 3 | 57125000 | 4226 | nofs | nofs |
| chr08 | E | 8q12    | 3 | 57375000 | 2977 | nofs | nofs |
| chr08 | E | 8q12    | 3 | 57625000 | 2394 | nofs | nofs |
| chr08 | E | 8q12    | 3 | 57875000 | 3021 | nofs | nofs |
| chr08 | E | 8q12    | 3 | 58125000 | 3138 | nofs | nofs |
| chr08 | E | 8q12    | 3 | 58375000 | 5901 | nofs | nofs |

|       |   |      |   |          |      |      |      |
|-------|---|------|---|----------|------|------|------|
| chr08 | E | 8q12 | 3 | 58625000 | 4312 | nofs | nofs |
| chr08 | E | 8q12 | 3 | 58875000 | 1687 | nofs | nofs |
| chr08 | E | 8q12 | 3 | 59125000 | 2208 | nofs | nofs |
| chr08 | E | 8q12 | 3 | 59375000 | 1904 | nofs | nofs |
| chr08 | E | 8q12 | 3 | 59625000 | 2602 | nofs | nofs |
| chr08 | E | 8q12 | 3 | 59875000 | 2631 | nofs | nofs |
| chr08 | E | 8q12 | 3 | 60125000 | 2573 | nofs | nofs |
| chr08 | E | 8q12 | 3 | 60375000 | 1731 | nofs | nofs |
| chr08 | E | 8q12 | 3 | 60625000 | 3245 | nofs | nofs |
| chr08 | E | 8q12 | 3 | 60875000 | 2130 | nofs | nofs |
| chr08 | E | 8q12 | 3 | 61125000 | 2009 | nofs | nofs |
| chr08 | E | 8q12 | 3 | 61375000 | 1946 | nofs | nofs |
| chr08 | E | 8q12 | 3 | 61625000 | 4896 | nofs | nofs |
| chr08 | E | 8q12 | 3 | 61875000 | 1873 | nofs | nofs |
| chr08 | E | 8q12 | 3 | 62125000 | 2405 | nofs | nofs |
| chr08 | E | 8q12 | 3 | 62375000 | 2012 | nofs | nofs |
| chr08 | E | 8q12 | 3 | 62625000 | 1692 | nofs | nofs |
| chr08 | E | 8q12 | 3 | 62875000 | 3141 | nofs | nofs |
| chr08 | E | 8q12 | 3 | 63125000 | 1708 | nofs | nofs |
| chr08 | E | 8q12 | 3 | 63375000 | 4649 | nofs | nofs |
| chr08 | E | 8q12 | 3 | 63625000 | 2432 | nofs | nofs |
| chr08 | E | 8q12 | 3 | 63875000 | 2134 | nofs | nofs |
| chr08 | E | 8q12 | 3 | 64125000 | 2491 | nofs | nofs |
| chr08 | E | 8q12 | 3 | 64375000 | 2730 | nofs | nofs |
| chr08 | E | 8q12 | 3 | 64625000 | 2127 | nofs | nofs |
| chr08 | E | 8q12 | 3 | 64875000 | 2185 | nofs | nofs |
| chr08 | E | 8q12 | 3 | 65125000 | 3607 | nofs | nofs |
| chr08 | E | 8q12 | 3 | 65375000 | 2844 | nofs | nofs |
| chr08 | E | 8q12 | 3 | 65625000 | 2569 | nofs | nofs |
| chr08 | E | 8q12 | 3 | 65875000 | 3672 | nofs | nofs |
| chr08 | E | 8q13 | 2 | 66125000 | 1985 | nofs | nofs |
| chr08 | E | 8q13 | 2 | 66375000 | 1979 | nofs | nofs |
| chr08 | E | 8q13 | 2 | 66625000 | 3967 | nofs | nofs |
| chr08 | E | 8q13 | 2 | 66875000 | 2375 | nofs | nofs |
| chr08 | E | 8q13 | 2 | 67125000 | 2207 | nofs | nofs |
| chr08 | E | 8q13 | 2 | 67375000 | 4026 | nofs | nofs |

|       |   |        |   |          |      |      |      |
|-------|---|--------|---|----------|------|------|------|
| chr08 | E | 8q13   | 2 | 67625000 | 3897 | nofs | nofs |
| chr08 | E | 8q13   | 2 | 67875000 | 3439 | nofs | nofs |
| chr08 | E | 8q13   | 2 | 68125000 | 2967 | nofs | nofs |
| chr08 | E | 8q13   | 2 | 68375000 | 3607 | nofs | nofs |
| chr08 | E | 8q13   | 2 | 68625000 | 2737 | nofs | nofs |
| chr08 | E | 8q13   | 2 | 68875000 | 1915 | nofs | nofs |
| chr08 | E | 8q13   | 2 | 69125000 | 1886 | nofs | nofs |
| chr08 | E | 8q13   | 2 | 69375000 | 2736 | nofs | nofs |
| chr08 | E | 8q13   | 2 | 69625000 | 1720 | nofs | nofs |
| chr08 | E | 8q13   | 2 | 69875000 | 3183 | nofs | nofs |
| chr08 | E | 8q13   | 2 | 70125000 | 2210 | nofs | nofs |
| chr08 | E | 8q13   | 2 | 70375000 | 6541 | nofs | nofs |
| chr08 | E | 8q13   | 2 | 70625000 | 3182 | nofs | nofs |
| chr08 | E | 8q13   | 2 | 70875000 | 3540 | nofs | nofs |
| chr08 | E | 8q13   | 2 | 71125000 | 2551 | nofs | nofs |
| chr08 | E | 8q13   | 2 | 71375000 | 1611 | nofs | nofs |
| chr08 | E | 8q13   | 2 | 71625000 | 2815 | nofs | nofs |
| chr08 | E | 8q13   | 2 | 71875000 | 2392 | nofs | nofs |
| chr08 | E | 8q13   | 2 | 72125000 | 1737 | nofs | nofs |
| chr08 | E | 8q13   | 2 | 72375000 | 1581 | nofs | nofs |
| chr08 | E | 8q13   | 2 | 72625000 | 1514 | nofs | nofs |
| chr08 | E | 8q13   | 2 | 72875000 | 4473 | nofs | nofs |
| chr08 | E | 8q13   | 2 | 73125000 | 2007 | nofs | nofs |
| chr08 | E | 8q13   | 2 | 73375000 | 2992 | nofs | nofs |
| chr08 | E | 8q13   | 2 | 73625000 | 2043 | nofs | nofs |
| chr08 | E | 8q13   | 2 | 73875000 | 1219 | nofs | nofs |
| chr08 | E | 8q13   | 2 | 74125000 | 4958 | nofs | nofs |
| chr08 | E | 8q21.1 | 3 | 74375000 | 1772 | nofs | nofs |
| chr08 | E | 8q21.1 | 3 | 74625000 | 2308 | nofs | nofs |
| chr08 | E | 8q21.1 | 3 | 74875000 | 4773 | nofs | nofs |
| chr08 | E | 8q21.1 | 3 | 75125000 | 2695 | nofs | nofs |
| chr08 | E | 8q21.1 | 3 | 75375000 | 2136 | nofs | nofs |
| chr08 | E | 8q21.1 | 3 | 75625000 | 2149 | nofs | nofs |
| chr08 | E | 8q21.1 | 3 | 75875000 | 2286 | nofs | nofs |
| chr08 | E | 8q21.1 | 3 | 76125000 | 2419 | nofs | nofs |
| chr08 | E | 8q21.1 | 3 | 76375000 | 3382 | nofs | nofs |

|       |   |        |   |          |       |      |      |
|-------|---|--------|---|----------|-------|------|------|
| chr08 | E | 8q21.1 | 3 | 76625000 | 2837  | nofs | nofs |
| chr08 | E | 8q21.1 | 3 | 76875000 | 1861  | nofs | nofs |
| chr08 | E | 8q21.1 | 3 | 77125000 | 3234  | nofs | nofs |
| chr08 | E | 8q21.1 | 3 | 77375000 | 2625  | nofs | nofs |
| chr08 | E | 8q21.1 | 3 | 77625000 | 3226  | nofs | nofs |
| chr08 | E | 8q21.1 | 3 | 77875000 | 2340  | nofs | nofs |
| chr08 | E | 8q21.1 | 3 | 78125000 | 1232  | nofs | nofs |
| chr08 | E | 8q21.1 | 3 | 78375000 | 3799  | nofs | nofs |
| chr08 | E | 8q21.1 | 3 | 78625000 | 2784  | nofs | nofs |
| chr08 | E | 8q21.1 | 3 | 78875000 | 2453  | nofs | nofs |
| chr08 | E | 8q21.1 | 3 | 79125000 | 2086  | nofs | nofs |
| chr08 | E | 8q21.1 | 3 | 79375000 | 2904  | nofs | nofs |
| chr08 | E | 8q21.1 | 3 | 79625000 | 2261  | nofs | nofs |
| chr08 | E | 8q21.1 | 3 | 79875000 | 3057  | nofs | nofs |
| chr08 | E | 8q21.1 | 3 | 80125000 | 1767  | nofs | nofs |
| chr08 | E | 8q21.1 | 3 | 80375000 | 2661  | nofs | nofs |
| chr08 | E | 8q21.1 | 3 | 80625000 | 1467  | nofs | nofs |
| chr08 | E | 8q21.1 | 3 | 80875000 | 2920  | nofs | nofs |
| chr08 | E | 8q21.1 | 3 | 81125000 | 2496  | nofs | nofs |
| chr08 | E | 8q21.1 | 3 | 81375000 | 4980  | nofs | nofs |
| chr08 | E | 8q21.1 | 3 | 81625000 | 1797  | nofs | nofs |
| chr08 | E | 8q21.1 | 3 | 81875000 | 1573  | nofs | nofs |
| chr08 | E | 8q21.1 | 3 | 82125000 | 2636  | nofs | nofs |
| chr08 | E | 8q21.1 | 3 | 82375000 | 1225  | nofs | nofs |
| chr08 | E | 8q21.1 | 3 | 82625000 | 1614  | nofs | nofs |
| chr08 | E | 8q21.1 | 3 | 82875000 | 3649  | nofs | nofs |
| chr08 | E | 8q21.1 | 3 | 83125000 | 3195  | nofs | nofs |
| chr08 | E | 8q21.1 | 3 | 83375000 | 13865 | nofs | nofs |
| chr08 | E | 8q21.1 | 3 | 83625000 | 3547  | nofs | nofs |
| chr08 | E | 8q21.1 | 3 | 83875000 | 3753  | nofs | nofs |
| chr08 | E | 8q21.1 | 3 | 84125000 | 3147  | nofs | nofs |
| chr08 | E | 8q21.1 | 3 | 84375000 | 2510  | nofs | nofs |
| chr08 | E | 8q21.1 | 3 | 84625000 | 3166  | nofs | nofs |
| chr08 | E | 8q21.1 | 3 | 84875000 | 2828  | nofs | nofs |
| chr08 | E | 8q21.2 | 2 | 85125000 | 1912  | nofs | nofs |
| chr08 | E | 8q21.2 | 2 | 85375000 | 2042  | nofs | nofs |

|       |   |        |   |          |      |      |           |
|-------|---|--------|---|----------|------|------|-----------|
| chr08 | E | 8q21.2 | 2 | 85625000 | 2077 | nofs | nofs      |
| chr08 | E | 8q21.2 | 2 | 85875000 | 1561 | nofs | nofs      |
| chr08 | E | 8q21.2 | 2 | 86125000 | 685  | nofs | nofs      |
| chr08 | E | 8q21.2 | 2 | 86375000 | 3527 | nofs | nofs      |
| chr08 | E | 8q21.2 | 2 | 86625000 | 1999 | nofs | nofs      |
| chr08 | E | 8q21.2 | 2 | 86875000 | 3596 | nofs | nofs      |
| chr08 | E | 8q21.2 | 2 | 87125000 | 4994 | nofs | nofs      |
| chr08 | B | 8q21.3 | . | 87375000 | 3224 | nofs | nofs      |
| chr08 | B | 8q21.3 | . | 87625000 | 2587 | nofs | nofs      |
| chr08 | B | 8q21.3 | . | 87875000 | 3377 | nofs | nofs      |
| chr08 | B | 8q21.3 | . | 88125000 | 3946 | nofs | nofs      |
| chr08 | B | 8q21.3 | . | 88375000 | 2650 | nofs | nofs      |
| chr08 | B | 8q21.3 | . | 88625000 | 2071 | nofs | nofs      |
| chr08 | B | 8q21.3 | . | 88875000 | 2441 | nofs | nofs      |
| chr08 | B | 8q21.3 | . | 89125000 | 1613 | nofs | nofs      |
| chr08 | B | 8q21.3 | . | 89375000 | 2633 | nofs | nofs      |
| chr08 | B | 8q21.3 | . | 89625000 | 1911 | nofs | nofs      |
| chr08 | B | 8q21.3 | . | 89875000 | 2734 | nofs | nofs      |
| chr08 | B | 8q21.3 | . | 90125000 | 2717 | nofs | nofs      |
| chr08 | B | 8q21.3 | . | 90375000 | 2239 | nofs | nofs      |
| chr08 | B | 8q21.3 | . | 90625000 | 2265 | nofs | nofs      |
| chr08 | B | 8q21.3 | . | 90875000 | 2889 | nofs | nofs      |
| chr08 | B | 8q21.3 | . | 91125000 | 3056 | nofs | nofs      |
| chr08 | B | 8q21.3 | . | 91375000 | 1939 | nofs | nofs      |
| chr08 | B | 8q21.3 | . | 91625000 | 1537 | nofs | nofs      |
| chr08 | B | 8q21.3 | . | 91875000 | 2473 | nofs | nofs      |
| chr08 | B | 8q21.3 | . | 92125000 | 2246 | nofs | nofs      |
| chr08 | B | 8q21.3 | . | 92375000 | 2233 | nofs | nofs      |
| chr08 | B | 8q21.3 | . | 92625000 | 1190 | nofs | nofs      |
| chr08 | B | 8q21.3 | . | 92875000 | 3069 | nofs | nofs      |
| chr08 | B | 8q21.3 | . | 93125000 | 2180 | nofs | nofs      |
| chr08 | B | 8q21.3 | . | 93375000 | 3288 | nofs | nofs      |
| chr08 | E | 8q22.1 | 3 | 93625000 | 2424 | fs   | fs common |
| chr08 | E | 8q22.1 | 3 | 93875000 | 1659 | fs   | fs common |
| chr08 | E | 8q22.1 | 3 | 94125000 | 2571 | fs   | fs common |
| chr08 | E | 8q22.1 | 3 | 94375000 | 2234 | fs   | fs common |

|       |   |        |   |           |      |      |           |
|-------|---|--------|---|-----------|------|------|-----------|
| chr08 | E | 8q22.1 | 3 | 94625000  | 6387 | fs   | fs common |
| chr08 | E | 8q22.1 | 3 | 94875000  | 6738 | fs   | fs common |
| chr08 | E | 8q22.1 | 3 | 95125000  | 2853 | fs   | fs common |
| chr08 | E | 8q22.1 | 3 | 95375000  | 2608 | fs   | fs common |
| chr08 | E | 8q22.1 | 3 | 95625000  | 3284 | fs   | fs common |
| chr08 | E | 8q22.1 | 3 | 95875000  | 3858 | fs   | fs common |
| chr08 | E | 8q22.1 | 3 | 96125000  | 2534 | fs   | fs common |
| chr08 | E | 8q22.1 | 3 | 96375000  | 2089 | fs   | fs common |
| chr08 | E | 8q22.1 | 3 | 96625000  | 2553 | fs   | fs common |
| chr08 | E | 8q22.1 | 3 | 96875000  | 2460 | fs   | fs common |
| chr08 | E | 8q22.1 | 3 | 97125000  | 2284 | fs   | fs common |
| chr08 | E | 8q22.1 | 3 | 97375000  | 2621 | fs   | fs common |
| chr08 | E | 8q22.1 | 3 | 97625000  | 2715 | fs   | fs common |
| chr08 | E | 8q22.1 | 3 | 97875000  | 2274 | fs   | fs common |
| chr08 | E | 8q22.1 | 3 | 98125000  | 2105 | fs   | fs common |
| chr08 | E | 8q22.1 | 3 | 98375000  | 2376 | fs   | fs common |
| chr08 | E | 8q22.1 | 3 | 98625000  | 3380 | fs   | fs common |
| chr08 | E | 8q22.1 | 3 | 98875000  | 5675 | fs   | fs common |
| chr08 | E | 8q22.1 | 3 | 99125000  | 3484 | fs   | fs common |
| chr08 | B | 8q22.2 | . | 99375000  | 2396 | nofs | nofs      |
| chr08 | B | 8q22.2 | . | 99625000  | 1992 | nofs | nofs      |
| chr08 | B | 8q22.2 | . | 99875000  | 3407 | nofs | nofs      |
| chr08 | B | 8q22.2 | . | 100000000 | 3076 | nofs | nofs      |
| chr08 | B | 8q22.2 | . | 100000000 | 2020 | nofs | nofs      |
| chr08 | B | 8q22.2 | . | 101000000 | 1759 | nofs | nofs      |
| chr08 | B | 8q22.2 | . | 101000000 | 2304 | nofs | nofs      |
| chr08 | B | 8q22.2 | . | 101000000 | 3762 | nofs | nofs      |
| chr08 | B | 8q22.2 | . | 101000000 | 2016 | nofs | nofs      |
| chr08 | E | 8q22.3 | 1 | 102000000 | 2611 | fs   | fs rare   |
| chr08 | E | 8q22.3 | 1 | 102000000 | 5116 | fs   | fs rare   |
| chr08 | E | 8q22.3 | 1 | 102000000 | 4356 | fs   | fs rare   |
| chr08 | E | 8q22.3 | 1 | 102000000 | 3143 | fs   | fs rare   |
| chr08 | E | 8q22.3 | 1 | 103000000 | 5026 | fs   | fs rare   |
| chr08 | E | 8q22.3 | 1 | 103000000 | 1712 | fs   | fs rare   |
| chr08 | E | 8q22.3 | 1 | 103000000 | 2040 | fs   | fs rare   |
| chr08 | E | 8q22.3 | 1 | 103000000 | 1364 | fs   | fs rare   |

|       |   |        |   |           |       |      |         |
|-------|---|--------|---|-----------|-------|------|---------|
| chr08 | E | 8q22.3 | 1 | 104000000 | 4017  | fs   | fs rare |
| chr08 | E | 8q22.3 | 1 | 104000000 | 4673  | fs   | fs rare |
| chr08 | E | 8q22.3 | 1 | 104000000 | 3830  | fs   | fs rare |
| chr08 | E | 8q22.3 | 1 | 104000000 | 2357  | fs   | fs rare |
| chr08 | E | 8q22.3 | 1 | 105000000 | 1885  | fs   | fs rare |
| chr08 | E | 8q22.3 | 1 | 105000000 | 2108  | fs   | fs rare |
| chr08 | E | 8q22.3 | 1 | 105000000 | 2729  | fs   | fs rare |
| chr08 | E | 8q22.3 | 1 | 105000000 | 1993  | fs   | fs rare |
| chr08 | E | 8q22.3 | 1 | 106000000 | 3586  | fs   | fs rare |
| chr08 | E | 8q22.3 | 1 | 106000000 | 1770  | fs   | fs rare |
| chr08 | E | 8q23   | 1 | 106000000 | 1845  | nofs | nofs    |
| chr08 | E | 8q23   | 1 | 106000000 | 3504  | nofs | nofs    |
| chr08 | E | 8q23   | 1 | 107000000 | 2901  | nofs | nofs    |
| chr08 | E | 8q23   | 1 | 107000000 | 3688  | nofs | nofs    |
| chr08 | E | 8q23   | 1 | 107000000 | 2374  | nofs | nofs    |
| chr08 | E | 8q23   | 1 | 107000000 | 2608  | nofs | nofs    |
| chr08 | E | 8q23   | 1 | 108000000 | 1820  | nofs | nofs    |
| chr08 | E | 8q23   | 1 | 108000000 | 3766  | nofs | nofs    |
| chr08 | E | 8q23   | 1 | 108000000 | 1551  | nofs | nofs    |
| chr08 | E | 8q23   | 1 | 108000000 | 3596  | nofs | nofs    |
| chr08 | E | 8q23   | 1 | 109000000 | 22860 | nofs | nofs    |
| chr08 | E | 8q23   | 1 | 109000000 | 2204  | nofs | nofs    |
| chr08 | E | 8q23   | 1 | 109000000 | 2309  | nofs | nofs    |
| chr08 | E | 8q23   | 1 | 109000000 | 1787  | nofs | nofs    |
| chr08 | E | 8q23   | 1 | 110000000 | 1647  | nofs | nofs    |
| chr08 | E | 8q23   | 1 | 110000000 | 2012  | nofs | nofs    |
| chr08 | E | 8q23   | 1 | 110000000 | 1427  | nofs | nofs    |
| chr08 | E | 8q23   | 1 | 110000000 | 1582  | nofs | nofs    |
| chr08 | E | 8q23   | 1 | 111000000 | 1781  | nofs | nofs    |
| chr08 | E | 8q23   | 1 | 111000000 | 2004  | nofs | nofs    |
| chr08 | E | 8q23   | 1 | 111000000 | 2623  | nofs | nofs    |
| chr08 | E | 8q23   | 1 | 111000000 | 2270  | nofs | nofs    |
| chr08 | E | 8q23   | 1 | 112000000 | 2572  | nofs | nofs    |
| chr08 | E | 8q23   | 1 | 112000000 | 2829  | nofs | nofs    |
| chr08 | E | 8q23   | 1 | 112000000 | 2404  | nofs | nofs    |
| chr08 | E | 8q23   | 1 | 112000000 | 2512  | nofs | nofs    |

|       |   |        |   |           |      |      |                    |
|-------|---|--------|---|-----------|------|------|--------------------|
| chr08 | E | 8q23   | 1 | 113000000 | 2963 | nofs | nofs               |
| chr08 | E | 8q23   | 1 | 113000000 | 2162 | nofs | nofs               |
| chr08 | E | 8q23   | 1 | 113000000 | 2373 | nofs | nofs               |
| chr08 | E | 8q23   | 1 | 113000000 | 2277 | nofs | nofs               |
| chr08 | E | 8q23   | 1 | 114000000 | 1911 | nofs | nofs               |
| chr08 | E | 8q23   | 1 | 114000000 | 2680 | nofs | nofs               |
| chr08 | E | 8q23   | 1 | 114000000 | 2118 | nofs | nofs               |
| chr08 | E | 8q23   | 1 | 114000000 | 2576 | nofs | nofs               |
| chr08 | E | 8q23   | 1 | 115000000 | 2539 | nofs | nofs               |
| chr08 | E | 8q23   | 1 | 115000000 | 2276 | nofs | nofs               |
| chr08 | E | 8q23   | 1 | 115000000 | 1594 | nofs | nofs               |
| chr08 | E | 8q23   | 1 | 115000000 | 2996 | nofs | nofs               |
| chr08 | E | 8q23   | 1 | 116000000 | 2367 | nofs | nofs               |
| chr08 | E | 8q23   | 1 | 116000000 | 2327 | nofs | nofs               |
| chr08 | E | 8q23   | 1 | 116000000 | 2733 | nofs | nofs               |
| chr08 | E | 8q23   | 1 | 116000000 | 1866 | nofs | nofs               |
| chr08 | E | 8q23   | 1 | 117000000 | 3295 | nofs | nofs               |
| chr08 | E | 8q23   | 1 | 117000000 | 3084 | nofs | nofs               |
| chr08 | E | 8q23   | 1 | 117000000 | 1908 | nofs | nofs               |
| chr08 | E | 8q23   | 1 | 117000000 | 4341 | nofs | nofs               |
| chr08 | E | 8q23   | 1 | 118000000 | 2403 | nofs | nofs               |
| chr08 | E | 8q24.1 | 2 | 118000000 | 3732 | fs   | fs common and rare |
| chr08 | E | 8q24.1 | 2 | 118000000 | 2905 | fs   | fs common and rare |
| chr08 | E | 8q24.1 | 2 | 118000000 | 1343 | fs   | fs common and rare |
| chr08 | E | 8q24.1 | 2 | 119000000 | 2473 | fs   | fs common and rare |
| chr08 | E | 8q24.1 | 2 | 119000000 | 2578 | fs   | fs common and rare |
| chr08 | E | 8q24.1 | 2 | 119000000 | 2780 | fs   | fs common and rare |
| chr08 | E | 8q24.1 | 2 | 119000000 | 1603 | fs   | fs common and rare |
| chr08 | E | 8q24.1 | 2 | 120000000 | 1558 | fs   | fs common and rare |
| chr08 | E | 8q24.1 | 2 | 120000000 | 1517 | fs   | fs common and rare |
| chr08 | E | 8q24.1 | 2 | 120000000 | 1828 | fs   | fs common and rare |
| chr08 | E | 8q24.1 | 2 | 120000000 | 1773 | fs   | fs common and rare |
| chr08 | E | 8q24.1 | 2 | 121000000 | 4820 | fs   | fs common and rare |
| chr08 | E | 8q24.1 | 2 | 121000000 | 3719 | fs   | fs common and rare |
| chr08 | E | 8q24.1 | 2 | 121000000 | 2699 | fs   | fs common and rare |
| chr08 | E | 8q24.1 | 2 | 121000000 | 2720 | fs   | fs common and rare |



|       |   |        |   |           |      |      |                    |
|-------|---|--------|---|-----------|------|------|--------------------|
| chr08 | E | 8q24.1 | 2 | 122000000 | 2751 | fs   | fs common and rare |
| chr08 | E | 8q24.1 | 2 | 122000000 | 2176 | fs   | fs common and rare |
| chr08 | E | 8q24.1 | 2 | 122000000 | 3522 | fs   | fs common and rare |
| chr08 | E | 8q24.1 | 2 | 122000000 | 3139 | fs   | fs common and rare |
| chr08 | E | 8q24.1 | 2 | 123000000 | 3396 | fs   | fs common and rare |
| chr08 | E | 8q24.1 | 2 | 123000000 | 2448 | fs   | fs common and rare |
| chr08 | E | 8q24.1 | 2 | 123000000 | 3069 | fs   | fs common and rare |
| chr08 | E | 8q24.1 | 2 | 123000000 | 2275 | fs   | fs common and rare |
| chr08 | E | 8q24.1 | 2 | 124000000 | 3031 | fs   | fs common and rare |
| chr08 | E | 8q24.1 | 2 | 124000000 | 1961 | fs   | fs common and rare |
| chr08 | E | 8q24.1 | 2 | 124000000 | 3255 | fs   | fs common and rare |
| chr08 | E | 8q24.1 | 2 | 124000000 | 3950 | fs   | fs common and rare |
| chr08 | E | 8q24.1 | 2 | 125000000 | 3900 | fs   | fs common and rare |
| chr08 | E | 8q24.1 | 2 | 125000000 | 2361 | fs   | fs common and rare |
| chr08 | E | 8q24.1 | 2 | 125000000 | 1572 | fs   | fs common and rare |
| chr08 | E | 8q24.1 | 2 | 125000000 | 4542 | fs   | fs common and rare |
| chr08 | E | 8q24.1 | 2 | 126000000 | 3123 | fs   | fs common and rare |
| chr08 | E | 8q24.1 | 2 | 126000000 | 3295 | fs   | fs common and rare |
| chr08 | E | 8q24.1 | 2 | 126000000 | 1960 | fs   | fs common and rare |
| chr08 | E | 8q24.1 | 2 | 126000000 | 3151 | fs   | fs common and rare |
| chr08 | E | 8q24.1 | 2 | 127000000 | 3897 | fs   | fs common and rare |
| chr08 | E | 8q24.1 | 2 | 127000000 | 2229 | fs   | fs common and rare |
| chr08 | E | 8q24.1 | 2 | 127000000 | 2309 | fs   | fs common and rare |
| chr08 | E | 8q24.1 | 2 | 127000000 | 2729 | fs   | fs common and rare |
| chr08 | B | 8q24.2 | . | 128000000 | 2524 | nofs | nofs               |
| chr08 | B | 8q24.2 | . | 128000000 | 2837 | nofs | nofs               |
| chr08 | B | 8q24.2 | . | 128000000 | 2368 | nofs | nofs               |
| chr08 | B | 8q24.2 | . | 128000000 | 3683 | nofs | nofs               |
| chr08 | B | 8q24.2 | . | 129000000 | 2531 | nofs | nofs               |
| chr08 | B | 8q24.2 | . | 129000000 | 5468 | nofs | nofs               |
| chr08 | B | 8q24.2 | . | 129000000 | 4053 | nofs | nofs               |
| chr08 | B | 8q24.2 | . | 129000000 | 4106 | nofs | nofs               |
| chr08 | B | 8q24.2 | . | 130000000 | 2497 | nofs | nofs               |
| chr08 | B | 8q24.2 | . | 130000000 | 3135 | nofs | nofs               |
| chr08 | B | 8q24.2 | . | 130000000 | 1927 | nofs | nofs               |
| chr08 | B | 8q24.2 | . | 130000000 | 1962 | nofs | nofs               |

|       |   |        |   |           |      |      |      |
|-------|---|--------|---|-----------|------|------|------|
| chr08 | B | 8q24.2 | . | 131000000 | 4546 | nofs | nofs |
| chr08 | B | 8q24.2 | . | 131000000 | 2926 | nofs | nofs |
| chr08 | B | 8q24.2 | . | 131000000 | 4430 | nofs | nofs |
| chr08 | B | 8q24.2 | . | 131000000 | 1737 | nofs | nofs |
| chr08 | B | 8q24.2 | . | 132000000 | 4898 | nofs | nofs |
| chr08 | B | 8q24.2 | . | 132000000 | 3859 | nofs | nofs |
| chr08 | B | 8q24.2 | . | 132000000 | 1770 | nofs | nofs |
| chr08 | B | 8q24.2 | . | 132000000 | 3489 | nofs | nofs |
| chr08 | B | 8q24.2 | . | 133000000 | 1926 | nofs | nofs |
| chr08 | B | 8q24.2 | . | 133000000 | 2070 | nofs | nofs |
| chr08 | B | 8q24.2 | . | 133000000 | 2447 | nofs | nofs |
| chr08 | B | 8q24.2 | . | 133000000 | 2668 | nofs | nofs |
| chr08 | B | 8q24.2 | . | 134000000 | 2440 | nofs | nofs |
| chr08 | B | 8q24.2 | . | 134000000 | 2930 | nofs | nofs |
| chr08 | B | 8q24.2 | . | 134000000 | 3059 | nofs | nofs |
| chr08 | B | 8q24.2 | . | 134000000 | 6020 | nofs | nofs |
| chr08 | B | 8q24.2 | . | 135000000 | 3702 | nofs | nofs |
| chr08 | B | 8q24.2 | . | 135000000 | 5529 | nofs | nofs |
| chr08 | B | 8q24.2 | . | 135000000 | 2375 | nofs | nofs |
| chr08 | B | 8q24.2 | . | 135000000 | 3127 | nofs | nofs |
| chr08 | B | 8q24.2 | . | 136000000 | 9564 | nofs | nofs |
| chr08 | B | 8q24.2 | . | 136000000 | 1976 | nofs | nofs |
| chr08 | B | 8q24.2 | . | 136000000 | 2164 | nofs | nofs |
| chr08 | B | 8q24.2 | . | 136000000 | 2941 | nofs | nofs |
| chr08 | B | 8q24.2 | . | 137000000 | 2457 | nofs | nofs |
| chr08 | B | 8q24.2 | . | 137000000 | 2960 | nofs | nofs |
| chr08 | B | 8q24.2 | . | 137000000 | 2347 | nofs | nofs |
| chr08 | B | 8q24.2 | . | 137000000 | 2839 | nofs | nofs |
| chr08 | B | 8q24.2 | . | 138000000 | 2127 | nofs | nofs |
| chr08 | B | 8q24.2 | . | 138000000 | 2417 | nofs | nofs |
| chr08 | B | 8q24.2 | . | 138000000 | 4532 | nofs | nofs |
| chr08 | B | 8q24.2 | . | 138000000 | 5369 | nofs | nofs |
| chr08 | B | 8q24.2 | . | 139000000 | 2898 | nofs | nofs |
| chr08 | B | 8q24.2 | . | 139000000 | 4585 | nofs | nofs |
| chr08 | B | 8q24.2 | . | 139000000 | 2546 | nofs | nofs |
| chr08 | B | 8q24.2 | . | 139000000 | 3341 | nofs | nofs |

|       |   |        |   |           |       |      |           |
|-------|---|--------|---|-----------|-------|------|-----------|
| chr08 | B | 8q24.2 | . | 140000000 | 3737  | nofs | nofs      |
| chr08 | B | 8q24.3 | . | 140000000 | 7774  | fs   | fs common |
| chr08 | B | 8q24.3 | . | 140000000 | 3415  | fs   | fs common |
| chr08 | B | 8q24.3 | . | 140000000 | 2189  | fs   | fs common |
| chr08 | B | 8q24.3 | . | 141000000 | 1695  | fs   | fs common |
| chr08 | B | 8q24.3 | . | 141000000 | 11623 | fs   | fs common |
| chr08 | B | 8q24.3 | . | 141000000 | 8245  | fs   | fs common |
| chr08 | B | 8q24.3 | . | 141000000 | 7455  | fs   | fs common |
| chr08 | B | 8q24.3 | . | 142000000 | 6072  | fs   | fs common |
| chr08 | B | 8q24.3 | . | 142000000 | 2658  | fs   | fs common |
| chr08 | B | 8q24.3 | . | 142000000 | 3992  | fs   | fs common |
| chr08 | B | 8q24.3 | . | 142000000 | 8929  | fs   | fs common |
| chr08 | B | 8q24.3 | . | 143000000 | 19431 | fs   | fs common |
| chr08 | B | 8q24.3 | . | 143000000 | 13360 | fs   | fs common |
| chr08 | B | 8q24.3 | . | 143000000 | 20925 | fs   | fs common |
| chr08 | T | 8q24.3 | . | 143000000 | 26395 | fs   | fs common |
| chr08 | T | 8q24.3 | . | 144000000 | 18742 | fs   | fs common |
| chr08 | T | 8q24.3 | . | 144000000 | 13605 | fs   | fs common |
| chr08 | T | 8q24.3 | . | 144000000 | 10008 | fs   | fs common |
| chr08 | T | 8q24.3 | . | 144000000 | 23721 | fs   | fs common |
| chr08 | T | 8q24.3 | . | 145000000 | 11171 | fs   | fs common |
| chr08 | T | 8q24.3 | . | 145000000 | 10687 | fs   | fs common |
| chr08 | T | 8q24.3 | . | 145000000 | 5848  | fs   | fs common |
| chr08 | T | 8q24.3 | . | 145000000 | 9382  | fs   | fs common |
| chr08 | T | 8q24.3 | . | 146000000 | 11639 | fs   | fs common |
| chr08 | T | 8q24.3 | . | 146000000 | 20902 | fs   | fs common |
| chr08 | T | 8q24.3 | . | 146000000 | 8437  | fs   | fs common |
| chr09 | T | 9p24   | 4 | 125000    | 5034  | nofs | nofs      |
| chr09 | T | 9p24   | 4 | 375000    | 6546  | nofs | nofs      |
| chr09 | T | 9p24   | 4 | 625000    | 3175  | nofs | nofs      |
| chr09 | T | 9p24   | 4 | 875000    | 3771  | nofs | nofs      |
| chr09 | T | 9p24   | 4 | 1125000   | 1480  | nofs | nofs      |
| chr09 | T | 9p24   | 4 | 1375000   | 1307  | nofs | nofs      |
| chr09 | T | 9p24   | 4 | 1625000   | 1478  | nofs | nofs      |
| chr09 | T | 9p24   | 4 | 1875000   | 2912  | nofs | nofs      |
| chr09 | T | 9p24   | 4 | 2125000   | 1853  | nofs | nofs      |

|       |   |      |   |          |      |      |      |
|-------|---|------|---|----------|------|------|------|
| chr09 | T | 9p24 | 4 | 2375000  | 2480 | nofs | nofs |
| chr09 | T | 9p24 | 4 | 2625000  | 2610 | nofs | nofs |
| chr09 | T | 9p24 | 4 | 2875000  | 1160 | nofs | nofs |
| chr09 | T | 9p24 | 4 | 3125000  | 2180 | nofs | nofs |
| chr09 | E | 9p24 | 4 | 3375000  | 4657 | nofs | nofs |
| chr09 | E | 9p24 | 4 | 3625000  | 1590 | nofs | nofs |
| chr09 | E | 9p24 | 4 | 3875000  | 2009 | nofs | nofs |
| chr09 | E | 9p24 | 4 | 4125000  | 1535 | nofs | nofs |
| chr09 | E | 9p24 | 4 | 4375000  | 2436 | nofs | nofs |
| chr09 | E | 9p24 | 4 | 4625000  | 3031 | nofs | nofs |
| chr09 | E | 9p24 | 4 | 4875000  | 1780 | nofs | nofs |
| chr09 | E | 9p24 | 4 | 5125000  | 1209 | nofs | nofs |
| chr09 | E | 9p24 | 4 | 5375000  | 3969 | nofs | nofs |
| chr09 | E | 9p24 | 4 | 5625000  | 2036 | nofs | nofs |
| chr09 | E | 9p24 | 4 | 5875000  | 2015 | nofs | nofs |
| chr09 | E | 9p24 | 4 | 6125000  | 2455 | nofs | nofs |
| chr09 | E | 9p24 | 4 | 6375000  | 3166 | nofs | nofs |
| chr09 | E | 9p24 | 4 | 6625000  | 5288 | nofs | nofs |
| chr09 | E | 9p24 | 4 | 6875000  | 4066 | nofs | nofs |
| chr09 | E | 9p24 | 4 | 7125000  | 2317 | nofs | nofs |
| chr09 | E | 9p24 | 4 | 7375000  | 1668 | nofs | nofs |
| chr09 | E | 9p24 | 4 | 7625000  | 1611 | nofs | nofs |
| chr09 | E | 9p24 | 4 | 7875000  | 1282 | nofs | nofs |
| chr09 | E | 9p24 | 4 | 8125000  | 1751 | nofs | nofs |
| chr09 | E | 9p24 | 4 | 8375000  | 2231 | nofs | nofs |
| chr09 | E | 9p24 | 4 | 8625000  | 1797 | nofs | nofs |
| chr09 | E | 9p24 | 4 | 8875000  | 2787 | nofs | nofs |
| chr09 | E | 9p24 | 4 | 9125000  | 1777 | nofs | nofs |
| chr09 | E | 9p23 | 1 | 9375000  | 1972 | nofs | nofs |
| chr09 | E | 9p23 | 1 | 9625000  | 1516 | nofs | nofs |
| chr09 | E | 9p23 | 1 | 9875000  | 2795 | nofs | nofs |
| chr09 | E | 9p23 | 1 | 10125000 | 3187 | nofs | nofs |
| chr09 | E | 9p23 | 1 | 10375000 | 2639 | nofs | nofs |
| chr09 | E | 9p23 | 1 | 10625000 | 2478 | nofs | nofs |
| chr09 | E | 9p23 | 1 | 10875000 | 3237 | nofs | nofs |
| chr09 | E | 9p23 | 1 | 11125000 | 2383 | nofs | nofs |

|       |   |      |   |          |      |      |                    |
|-------|---|------|---|----------|------|------|--------------------|
| chr09 | E | 9p23 | 1 | 11375000 | 2553 | nofs | nofs               |
| chr09 | E | 9p23 | 1 | 11625000 | 1948 | nofs | nofs               |
| chr09 | E | 9p23 | 1 | 11875000 | 3459 | nofs | nofs               |
| chr09 | E | 9p23 | 1 | 12125000 | 2687 | nofs | nofs               |
| chr09 | E | 9p23 | 1 | 12375000 | 2971 | nofs | nofs               |
| chr09 | E | 9p23 | 1 | 12625000 | 2486 | nofs | nofs               |
| chr09 | E | 9p23 | 1 | 12875000 | 1987 | nofs | nofs               |
| chr09 | E | 9p23 | 1 | 13125000 | 2128 | nofs | nofs               |
| chr09 | E | 9p23 | 1 | 13375000 | 1274 | nofs | nofs               |
| chr09 | E | 9p23 | 1 | 13625000 | 1886 | nofs | nofs               |
| chr09 | E | 9p23 | 1 | 13875000 | 2483 | nofs | nofs               |
| chr09 | E | 9p23 | 1 | 14125000 | 3243 | nofs | nofs               |
| chr09 | B | 9p22 | . | 14375000 | 1935 | nofs | nofs               |
| chr09 | B | 9p22 | . | 14625000 | 1655 | nofs | nofs               |
| chr09 | B | 9p22 | . | 14875000 | 6047 | nofs | nofs               |
| chr09 | B | 9p22 | . | 15125000 | 2962 | nofs | nofs               |
| chr09 | B | 9p22 | . | 15375000 | 4176 | nofs | nofs               |
| chr09 | B | 9p22 | . | 15625000 | 1975 | nofs | nofs               |
| chr09 | B | 9p22 | . | 15875000 | 1797 | nofs | nofs               |
| chr09 | B | 9p22 | . | 16125000 | 1538 | nofs | nofs               |
| chr09 | B | 9p22 | . | 16375000 | 2102 | nofs | nofs               |
| chr09 | B | 9p22 | . | 16625000 | 1684 | nofs | nofs               |
| chr09 | B | 9p22 | . | 16875000 | 4186 | nofs | nofs               |
| chr09 | B | 9p22 | . | 17125000 | 3042 | nofs | nofs               |
| chr09 | B | 9p22 | . | 17375000 | 1976 | nofs | nofs               |
| chr09 | B | 9p22 | . | 17625000 | 1919 | nofs | nofs               |
| chr09 | B | 9p22 | . | 17875000 | 2151 | nofs | nofs               |
| chr09 | B | 9p22 | . | 18125000 | 2096 | nofs | nofs               |
| chr09 | B | 9p22 | . | 18375000 | 2097 | nofs | nofs               |
| chr09 | B | 9p22 | . | 18625000 | 1519 | nofs | nofs               |
| chr09 | B | 9p22 | . | 18875000 | 3279 | nofs | nofs               |
| chr09 | B | 9p22 | . | 19125000 | 4152 | nofs | nofs               |
| chr09 | B | 9p22 | . | 19375000 | 4117 | nofs | nofs               |
| chr09 | B | 9p22 | . | 19625000 | 2186 | nofs | nofs               |
| chr09 | E | 9p21 | 5 | 19875000 | 2531 | fs   | fs common and rare |
| chr09 | E | 9p21 | 5 | 20125000 | 1995 | fs   | fs common and rare |

|       |   |      |   |          |      |    |                    |
|-------|---|------|---|----------|------|----|--------------------|
| chr09 | E | 9p21 | 5 | 20375000 | 1505 | fs | fs common and rare |
| chr09 | E | 9p21 | 5 | 20625000 | 2328 | fs | fs common and rare |
| chr09 | E | 9p21 | 5 | 20875000 | 3381 | fs | fs common and rare |
| chr09 | E | 9p21 | 5 | 21125000 | 2391 | fs | fs common and rare |
| chr09 | E | 9p21 | 5 | 21375000 | 1918 | fs | fs common and rare |
| chr09 | E | 9p21 | 5 | 21625000 | 1831 | fs | fs common and rare |
| chr09 | E | 9p21 | 5 | 21875000 | 2351 | fs | fs common and rare |
| chr09 | E | 9p21 | 5 | 22125000 | 2006 | fs | fs common and rare |
| chr09 | E | 9p21 | 5 | 22375000 | 3463 | fs | fs common and rare |
| chr09 | E | 9p21 | 5 | 22625000 | 2204 | fs | fs common and rare |
| chr09 | E | 9p21 | 5 | 22875000 | 2380 | fs | fs common and rare |
| chr09 | E | 9p21 | 5 | 23125000 | 1314 | fs | fs common and rare |
| chr09 | E | 9p21 | 5 | 23375000 | 2296 | fs | fs common and rare |
| chr09 | E | 9p21 | 5 | 23625000 | 1744 | fs | fs common and rare |
| chr09 | E | 9p21 | 5 | 23875000 | 2639 | fs | fs common and rare |
| chr09 | E | 9p21 | 5 | 24125000 | 1693 | fs | fs common and rare |
| chr09 | E | 9p21 | 5 | 24375000 | 2020 | fs | fs common and rare |
| chr09 | E | 9p21 | 5 | 24625000 | 2389 | fs | fs common and rare |
| chr09 | E | 9p21 | 5 | 24875000 | 2304 | fs | fs common and rare |
| chr09 | E | 9p21 | 5 | 25125000 | 4405 | fs | fs common and rare |
| chr09 | E | 9p21 | 5 | 25375000 | 3382 | fs | fs common and rare |
| chr09 | E | 9p21 | 5 | 25625000 | 3104 | fs | fs common and rare |
| chr09 | E | 9p21 | 5 | 25875000 | 3296 | fs | fs common and rare |
| chr09 | E | 9p21 | 5 | 26125000 | 3521 | fs | fs common and rare |
| chr09 | E | 9p21 | 5 | 26375000 | 3387 | fs | fs common and rare |
| chr09 | E | 9p21 | 5 | 26625000 | 2270 | fs | fs common and rare |
| chr09 | E | 9p21 | 5 | 26875000 | 2876 | fs | fs common and rare |
| chr09 | E | 9p21 | 5 | 27125000 | 1854 | fs | fs common and rare |
| chr09 | E | 9p21 | 5 | 27375000 | 1738 | fs | fs common and rare |
| chr09 | E | 9p21 | 5 | 27625000 | 1899 | fs | fs common and rare |
| chr09 | E | 9p21 | 5 | 27875000 | 1028 | fs | fs common and rare |
| chr09 | E | 9p21 | 5 | 28125000 | 3399 | fs | fs common and rare |
| chr09 | E | 9p21 | 5 | 28375000 | 3549 | fs | fs common and rare |
| chr09 | E | 9p21 | 5 | 28625000 | 2410 | fs | fs common and rare |
| chr09 | E | 9p21 | 5 | 28875000 | 3492 | fs | fs common and rare |
| chr09 | E | 9p21 | 5 | 29125000 | 2931 | fs | fs common and rare |

|       |   |      |   |          |      |      |                    |
|-------|---|------|---|----------|------|------|--------------------|
| chr09 | E | 9p21 | 5 | 29375000 | 2082 | fs   | fs common and rare |
| chr09 | E | 9p21 | 5 | 29625000 | 2122 | fs   | fs common and rare |
| chr09 | E | 9p21 | 5 | 29875000 | 2683 | fs   | fs common and rare |
| chr09 | E | 9p21 | 5 | 30125000 | 2852 | fs   | fs common and rare |
| chr09 | E | 9p21 | 5 | 30375000 | 2555 | fs   | fs common and rare |
| chr09 | E | 9p21 | 5 | 30625000 | 1865 | fs   | fs common and rare |
| chr09 | E | 9p21 | 5 | 30875000 | 2528 | fs   | fs common and rare |
| chr09 | E | 9p21 | 5 | 31125000 | 2288 | fs   | fs common and rare |
| chr09 | E | 9p21 | 5 | 31375000 | 3280 | fs   | fs common and rare |
| chr09 | E | 9p21 | 5 | 31625000 | 1878 | fs   | fs common and rare |
| chr09 | E | 9p21 | 5 | 31875000 | 1331 | fs   | fs common and rare |
| chr09 | E | 9p21 | 5 | 32125000 | 1191 | fs   | fs common and rare |
| chr09 | E | 9p21 | 5 | 32375000 | 2783 | fs   | fs common and rare |
| chr09 | E | 9p21 | 5 | 32625000 | 1967 | fs   | fs common and rare |
| chr09 | E | 9p21 | 5 | 32875000 | 3743 | fs   | fs common and rare |
| chr09 | E | 9p21 | 5 | 33125000 | 3086 | fs   | fs common and rare |
| chr09 | E | 9p21 | 5 | 33375000 | 2870 | fs   | fs common and rare |
| chr09 | E | 9p13 | 2 | 33625000 | 4152 | nofs | nofs               |
| chr09 | E | 9p13 | 2 | 33875000 | 4184 | nofs | nofs               |
| chr09 | E | 9p13 | 2 | 34125000 | 6198 | nofs | nofs               |
| chr09 | E | 9p13 | 2 | 34375000 | 2883 | nofs | nofs               |
| chr09 | E | 9p13 | 2 | 34625000 | 3210 | nofs | nofs               |
| chr09 | E | 9p13 | 2 | 34875000 | 2753 | nofs | nofs               |
| chr09 | E | 9p13 | 2 | 35125000 | 4862 | nofs | nofs               |
| chr09 | E | 9p13 | 2 | 35375000 | 5553 | nofs | nofs               |
| chr09 | E | 9p13 | 2 | 35625000 | 1816 | nofs | nofs               |
| chr09 | E | 9p13 | 2 | 35875000 | 5032 | nofs | nofs               |
| chr09 | E | 9p13 | 2 | 36125000 | 2524 | nofs | nofs               |
| chr09 | E | 9p13 | 2 | 36375000 | 3576 | nofs | nofs               |
| chr09 | E | 9p13 | 2 | 36625000 | 5383 | nofs | nofs               |
| chr09 | E | 9p13 | 2 | 36875000 | 3792 | nofs | nofs               |
| chr09 | E | 9p13 | 2 | 37125000 | 4692 | nofs | nofs               |
| chr09 | E | 9p13 | 2 | 37375000 | 3032 | nofs | nofs               |
| chr09 | E | 9p13 | 2 | 37625000 | 4067 | nofs | nofs               |
| chr09 | E | 9p13 | 2 | 37875000 | 2490 | nofs | nofs               |
| chr09 | E | 9p13 | 2 | 38125000 | 4160 | nofs | nofs               |

|       |   |      |   |          |      |      |      |
|-------|---|------|---|----------|------|------|------|
| chr09 | E | 9p13 | 2 | 38375000 | 4006 | nofs | nofs |
| chr09 | E | 9p13 | 2 | 38625000 | 3482 | nofs | nofs |
| chr09 | E | 9p13 | 2 | 38875000 | 2429 | nofs | nofs |
| chr09 | E | 9p13 | 2 | 39125000 | 2455 | nofs | nofs |
| chr09 | E | 9p13 | 2 | 39375000 | 2697 | nofs | nofs |
| chr09 | E | 9p13 | 2 | 39625000 | 3110 | nofs | nofs |
| chr09 | E | 9p13 | 2 | 39875000 | 1136 | nofs | nofs |
| chr09 | E | 9p13 | 2 | 40125000 | 2061 | nofs | nofs |
| chr09 | E | 9p13 | 2 | 40375000 | 2528 | nofs | nofs |
| chr09 | E | 9p13 | 2 | 40625000 | 3090 | nofs | nofs |
| chr09 | E | 9p13 | 2 | 40875000 | 2147 | nofs | nofs |
| chr09 | E | 9p13 | 2 | 41125000 | 2713 | nofs | nofs |
| chr09 | E | 9p13 | 2 | 41375000 | 1807 | nofs | nofs |
| chr09 | B | 9p12 | . | 41625000 | 3025 | nofs | nofs |
| chr09 | B | 9p12 | . | 41875000 | 1250 | nofs | nofs |
| chr09 | B | 9p12 | . | 42125000 | 2774 | nofs | nofs |
| chr09 | B | 9p12 | . | 42375000 | 1582 | nofs | nofs |
| chr09 | B | 9p12 | . | 42625000 | 1223 | nofs | nofs |
| chr09 | C | 9p12 | . | 42875000 | 1777 | nofs | nofs |
| chr09 | C | 9p12 | . | 43125000 | 2376 | nofs | nofs |
| chr09 | C | 9p12 | . | 43375000 | 2865 | nofs | nofs |
| chr09 | C | 9p12 | . | 43625000 | 1216 | nofs | nofs |
| chr09 | C | 9p12 | . | 43875000 | 9834 | nofs | nofs |
| chr09 | C | 9p12 | . | 44125000 | 6590 | nofs | nofs |
| chr09 | C | 9p12 | . | 44375000 | 7392 | nofs | nofs |
| chr09 | C | 9p11 | . | 44625000 | 2136 | nofs | nofs |
| chr09 | C | 9p11 | . | 44875000 | 3615 | nofs | nofs |
| chr09 | C | 9p11 | . | 45125000 | 1123 | nofs | nofs |
| chr09 | C | 9p11 | . | 45375000 | 5925 | nofs | nofs |
| chr09 | C | 9p11 | . | 45625000 | 1324 | nofs | nofs |
| chr09 | C | 9p11 | . | 45875000 | 833  | nofs | nofs |
| chr09 | C |      | . | 46125000 | 0    | nofs | nofs |
| chr09 | C |      | . | 46375000 | 0    | nofs | nofs |
| chr09 | C |      | . | 46625000 | 0    | nofs | nofs |
| chr09 | C |      | . | 46875000 | 0    | nofs | nofs |
| chr09 | C |      | . | 47125000 | 0    | nofs | nofs |



|       |   |   |          |   |      |      |
|-------|---|---|----------|---|------|------|
| chr09 | C | . | 47375000 | 0 | nofs | nofs |
| chr09 | C | . | 47625000 | 0 | nofs | nofs |
| chr09 | C | . | 47875000 | 0 | nofs | nofs |
| chr09 | C | . | 48125000 | 0 | nofs | nofs |
| chr09 | C | . | 48375000 | 0 | nofs | nofs |
| chr09 | C | . | 48625000 | 0 | nofs | nofs |
| chr09 | C | . | 48875000 | 0 | nofs | nofs |
| chr09 | C | . | 49125000 | 0 | nofs | nofs |
| chr09 | C | . | 49375000 | 0 | nofs | nofs |
| chr09 | C | . | 49625000 | 0 | nofs | nofs |
| chr09 | C | . | 49875000 | 0 | nofs | nofs |
| chr09 | C | . | 50125000 | 0 | nofs | nofs |
| chr09 | C | . | 50375000 | 0 | nofs | nofs |
| chr09 | C | . | 50625000 | 0 | nofs | nofs |
| chr09 | C | . | 50875000 | 0 | nofs | nofs |
| chr09 | C | . | 51125000 | 0 | nofs | nofs |
| chr09 | C | . | 51375000 | 0 | nofs | nofs |
| chr09 | C | . | 51625000 | 0 | nofs | nofs |
| chr09 | C | . | 51875000 | 0 | nofs | nofs |
| chr09 | C | . | 52125000 | 0 | nofs | nofs |
| chr09 | C | . | 52375000 | 0 | nofs | nofs |
| chr09 | C | . | 52625000 | 0 | nofs | nofs |
| chr09 | C | . | 52875000 | 0 | nofs | nofs |
| chr09 | C | . | 53125000 | 0 | nofs | nofs |
| chr09 | C | . | 53375000 | 0 | nofs | nofs |
| chr09 | C | . | 53625000 | 0 | nofs | nofs |
| chr09 | C | . | 53875000 | 0 | nofs | nofs |
| chr09 | C | . | 54125000 | 0 | nofs | nofs |
| chr09 | C | . | 54375000 | 0 | nofs | nofs |
| chr09 | C | . | 54625000 | 0 | nofs | nofs |
| chr09 | C | . | 54875000 | 0 | nofs | nofs |
| chr09 | C | . | 55125000 | 0 | nofs | nofs |
| chr09 | C | . | 55375000 | 0 | nofs | nofs |
| chr09 | C | . | 55625000 | 0 | nofs | nofs |
| chr09 | C | . | 55875000 | 0 | nofs | nofs |
| chr09 | C | . | 56125000 | 0 | nofs | nofs |



|       |   |        |   |          |       |      |           |
|-------|---|--------|---|----------|-------|------|-----------|
| chr09 | C | 9q12   | . | 65375000 | 2085  | fs   | fs common |
| chr09 | C | 9q12   | . | 65625000 | 41828 | fs   | fs common |
| chr09 | C | 9q12   | . | 65875000 | 14185 | fs   | fs common |
| chr09 | C | 9q12   | . | 66125000 | 6261  | fs   | fs common |
| chr09 | C | 9q12   | . | 66375000 | 1785  | fs   | fs common |
| chr09 | C | 9q12   | . | 66625000 | 6970  | fs   | fs common |
| chr09 | C | 9q12   | . | 66875000 | 3978  | fs   | fs common |
| chr09 | C | 9q12   | . | 67125000 | 16887 | fs   | fs common |
| chr09 | B | 9q12   | . | 67375000 | 1009  | fs   | fs common |
| chr09 | B | 9q13   | . | 67625000 | 47025 | nofs | nofs      |
| chr09 | B | 9q13   | . | 67875000 | 19161 | nofs | nofs      |
| chr09 | B | 9q13   | . | 68125000 | 7683  | nofs | nofs      |
| chr09 | B | 9q13   | . | 68375000 | 1969  | nofs | nofs      |
| chr09 | B | 9q13   | . | 68625000 | 1966  | nofs | nofs      |
| chr09 | B | 9q13   | . | 68875000 | 2366  | nofs | nofs      |
| chr09 | B | 9q21.1 | . | 69125000 | 3455  | nofs | nofs      |
| chr09 | B | 9q21.1 | . | 69375000 | 2541  | nofs | nofs      |
| chr09 | B | 9q21.1 | . | 69625000 | 2360  | nofs | nofs      |
| chr09 | B | 9q21.1 | . | 69875000 | 1876  | nofs | nofs      |
| chr09 | B | 9q21.1 | . | 70125000 | 1769  | nofs | nofs      |
| chr09 | B | 9q21.1 | . | 70375000 | 2205  | nofs | nofs      |
| chr09 | B | 9q21.1 | . | 70625000 | 2473  | nofs | nofs      |
| chr09 | B | 9q21.1 | . | 70875000 | 2097  | nofs | nofs      |
| chr09 | B | 9q21.1 | . | 71125000 | 2487  | nofs | nofs      |
| chr09 | B | 9q21.1 | . | 71375000 | 3088  | nofs | nofs      |
| chr09 | B | 9q21.1 | . | 71625000 | 3248  | nofs | nofs      |
| chr09 | B | 9q21.1 | . | 71875000 | 2303  | nofs | nofs      |
| chr09 | B | 9q21.1 | . | 72125000 | 2671  | nofs | nofs      |
| chr09 | B | 9q21.1 | . | 72375000 | 4363  | nofs | nofs      |
| chr09 | B | 9q21.1 | . | 72625000 | 5127  | nofs | nofs      |
| chr09 | B | 9q21.1 | . | 72875000 | 2105  | nofs | nofs      |
| chr09 | B | 9q21.1 | . | 73125000 | 2256  | nofs | nofs      |
| chr09 | B | 9q21.1 | . | 73375000 | 1939  | nofs | nofs      |
| chr09 | B | 9q21.1 | . | 73625000 | 1792  | nofs | nofs      |
| chr09 | B | 9q21.1 | . | 73875000 | 2726  | nofs | nofs      |
| chr09 | B | 9q21.1 | . | 74125000 | 4589  | nofs | nofs      |

|       |   |        |   |          |      |      |      |
|-------|---|--------|---|----------|------|------|------|
| chr09 | B | 9q21.1 | . | 74375000 | 1930 | nofs | nofs |
| chr09 | B | 9q21.1 | . | 74625000 | 2945 | nofs | nofs |
| chr09 | B | 9q21.1 | . | 74875000 | 2665 | nofs | nofs |
| chr09 | B | 9q21.1 | . | 75125000 | 2711 | nofs | nofs |
| chr09 | B | 9q21.1 | . | 75375000 | 3355 | nofs | nofs |
| chr09 | B | 9q21.1 | . | 75625000 | 1707 | nofs | nofs |
| chr09 | B | 9q21.1 | . | 75875000 | 2616 | nofs | nofs |
| chr09 | B | 9q21.1 | . | 76125000 | 5111 | nofs | nofs |
| chr09 | B | 9q21.1 | . | 76375000 | 2433 | nofs | nofs |
| chr09 | E | 9q21.2 | 2 | 76625000 | 2607 | nofs | nofs |
| chr09 | E | 9q21.2 | 2 | 76875000 | 3797 | nofs | nofs |
| chr09 | E | 9q21.2 | 2 | 77125000 | 1717 | nofs | nofs |
| chr09 | E | 9q21.2 | 2 | 77375000 | 2202 | nofs | nofs |
| chr09 | E | 9q21.2 | 2 | 77625000 | 5312 | nofs | nofs |
| chr09 | E | 9q21.2 | 2 | 77875000 | 1252 | nofs | nofs |
| chr09 | E | 9q21.2 | 2 | 78125000 | 4112 | nofs | nofs |
| chr09 | E | 9q21.2 | 2 | 78375000 | 2894 | nofs | nofs |
| chr09 | E | 9q21.3 | 4 | 78625000 | 2282 | nofs | nofs |
| chr09 | E | 9q21.3 | 4 | 78875000 | 2801 | nofs | nofs |
| chr09 | E | 9q21.3 | 4 | 79125000 | 2464 | nofs | nofs |
| chr09 | E | 9q21.3 | 4 | 79375000 | 1666 | nofs | nofs |
| chr09 | E | 9q21.3 | 4 | 79625000 | 2947 | nofs | nofs |
| chr09 | E | 9q21.3 | 4 | 79875000 | 3227 | nofs | nofs |
| chr09 | E | 9q21.3 | 4 | 80125000 | 2136 | nofs | nofs |
| chr09 | E | 9q21.3 | 4 | 80375000 | 2129 | nofs | nofs |
| chr09 | E | 9q21.3 | 4 | 80625000 | 3183 | nofs | nofs |
| chr09 | E | 9q21.3 | 4 | 80875000 | 2993 | nofs | nofs |
| chr09 | E | 9q21.3 | 4 | 81125000 | 1703 | nofs | nofs |
| chr09 | E | 9q21.3 | 4 | 81375000 | 1619 | nofs | nofs |
| chr09 | E | 9q21.3 | 4 | 81625000 | 6592 | nofs | nofs |
| chr09 | E | 9q21.3 | 4 | 81875000 | 2750 | nofs | nofs |
| chr09 | E | 9q21.3 | 4 | 82125000 | 1496 | nofs | nofs |
| chr09 | E | 9q21.3 | 4 | 82375000 | 3039 | nofs | nofs |
| chr09 | E | 9q21.3 | 4 | 82625000 | 2524 | nofs | nofs |
| chr09 | E | 9q21.3 | 4 | 82875000 | 2461 | nofs | nofs |
| chr09 | E | 9q21.3 | 4 | 83125000 | 3917 | nofs | nofs |

|       |   |        |   |          |      |      |           |
|-------|---|--------|---|----------|------|------|-----------|
| chr09 | E | 9q21.3 | 4 | 83375000 | 3631 | nofs | nofs      |
| chr09 | E | 9q21.3 | 4 | 83625000 | 3626 | nofs | nofs      |
| chr09 | E | 9q21.3 | 4 | 83875000 | 3053 | nofs | nofs      |
| chr09 | E | 9q21.3 | 4 | 84125000 | 2953 | nofs | nofs      |
| chr09 | E | 9q21.3 | 4 | 84375000 | 5058 | nofs | nofs      |
| chr09 | E | 9q21.3 | 4 | 84625000 | 2545 | nofs | nofs      |
| chr09 | E | 9q21.3 | 4 | 84875000 | 1940 | nofs | nofs      |
| chr09 | E | 9q21.3 | 4 | 85125000 | 3039 | nofs | nofs      |
| chr09 | E | 9q21.3 | 4 | 85375000 | 3689 | nofs | nofs      |
| chr09 | E | 9q21.3 | 4 | 85625000 | 2418 | nofs | nofs      |
| chr09 | E | 9q21.3 | 4 | 85875000 | 5885 | nofs | nofs      |
| chr09 | E | 9q21.3 | 4 | 86125000 | 2940 | nofs | nofs      |
| chr09 | E | 9q21.3 | 4 | 86375000 | 3708 | nofs | nofs      |
| chr09 | E | 9q21.3 | 4 | 86625000 | 2299 | nofs | nofs      |
| chr09 | E | 9q21.3 | 4 | 86875000 | 2198 | nofs | nofs      |
| chr09 | E | 9q21.3 | 4 | 87125000 | 2997 | nofs | nofs      |
| chr09 | E | 9q21.3 | 4 | 87375000 | 6028 | nofs | nofs      |
| chr09 | E | 9q22.1 | 3 | 87625000 | 6466 | fs   | fs common |
| chr09 | E | 9q22.1 | 3 | 87875000 | 3061 | fs   | fs common |
| chr09 | E | 9q22.1 | 3 | 88125000 | 7697 | fs   | fs common |
| chr09 | E | 9q22.1 | 3 | 88375000 | 4727 | fs   | fs common |
| chr09 | E | 9q22.1 | 3 | 88625000 | 5902 | fs   | fs common |
| chr09 | E | 9q22.1 | 3 | 88875000 | 5381 | fs   | fs common |
| chr09 | E | 9q22.2 | 2 | 89125000 | 5946 | nofs | nofs      |
| chr09 | E | 9q22.2 | 2 | 89375000 | 4094 | nofs | nofs      |
| chr09 | E | 9q22.2 | 2 | 89625000 | 3937 | nofs | nofs      |
| chr09 | E | 9q22.2 | 2 | 89875000 | 2791 | nofs | nofs      |
| chr09 | E | 9q22.2 | 2 | 90125000 | 4952 | nofs | nofs      |
| chr09 | E | 9q22.2 | 2 | 90375000 | 2581 | nofs | nofs      |
| chr09 | E | 9q22.2 | 2 | 90625000 | 6996 | nofs | nofs      |
| chr09 | E | 9q22.2 | 2 | 90875000 | 3924 | nofs | nofs      |
| chr09 | E | 9q22.3 | 4 | 91125000 | 1683 | nofs | nofs      |
| chr09 | E | 9q22.3 | 4 | 91375000 | 3911 | nofs | nofs      |
| chr09 | E | 9q22.3 | 4 | 91625000 | 6948 | nofs | nofs      |
| chr09 | E | 9q22.3 | 4 | 91875000 | 2705 | nofs | nofs      |
| chr09 | E | 9q22.3 | 4 | 92125000 | 3167 | nofs | nofs      |

|       |   |        |   |          |      |      |      |
|-------|---|--------|---|----------|------|------|------|
| chr09 | E | 9q22.3 | 4 | 92375000 | 2434 | nofs | nofs |
| chr09 | E | 9q22.3 | 4 | 92625000 | 3985 | nofs | nofs |
| chr09 | E | 9q22.3 | 4 | 92875000 | 4321 | nofs | nofs |
| chr09 | E | 9q22.3 | 4 | 93125000 | 5006 | nofs | nofs |
| chr09 | E | 9q22.3 | 4 | 93375000 | 3549 | nofs | nofs |
| chr09 | E | 9q22.3 | 4 | 93625000 | 7156 | nofs | nofs |
| chr09 | E | 9q22.3 | 4 | 93875000 | 2344 | nofs | nofs |
| chr09 | E | 9q22.3 | 4 | 94125000 | 3402 | nofs | nofs |
| chr09 | E | 9q22.3 | 4 | 94375000 | 3332 | nofs | nofs |
| chr09 | E | 9q22.3 | 4 | 94625000 | 3812 | nofs | nofs |
| chr09 | E | 9q22.3 | 4 | 94875000 | 3478 | nofs | nofs |
| chr09 | E | 9q22.3 | 4 | 95125000 | 3466 | nofs | nofs |
| chr09 | E | 9q22.3 | 4 | 95375000 | 4661 | nofs | nofs |
| chr09 | E | 9q22.3 | 4 | 95625000 | 3514 | nofs | nofs |
| chr09 | E | 9q22.3 | 4 | 95875000 | 3708 | nofs | nofs |
| chr09 | E | 9q22.3 | 4 | 96125000 | 4253 | nofs | nofs |
| chr09 | E | 9q22.3 | 4 | 96375000 | 3420 | nofs | nofs |
| chr09 | E | 9q22.3 | 4 | 96625000 | 5656 | nofs | nofs |
| chr09 | E | 9q22.3 | 4 | 96875000 | 3041 | nofs | nofs |
| chr09 | E | 9q22.3 | 4 | 97125000 | 3460 | nofs | nofs |
| chr09 | E | 9q22.3 | 4 | 97375000 | 2386 | nofs | nofs |
| chr09 | E | 9q22.3 | 4 | 97625000 | 2540 | nofs | nofs |
| chr09 | E | 9q22.3 | 4 | 97875000 | 3285 | nofs | nofs |
| chr09 | E | 9q22.3 | 4 | 98125000 | 3293 | nofs | nofs |
| chr09 | E | 9q22.3 | 4 | 98375000 | 3854 | nofs | nofs |
| chr09 | E | 9q22.3 | 4 | 98625000 | 1836 | nofs | nofs |
| chr09 | E | 9q22.3 | 4 | 98875000 | 2730 | nofs | nofs |
| chr09 | E | 9q22.3 | 4 | 99125000 | 3768 | nofs | nofs |
| chr09 | E | 9q22.3 | 4 | 99375000 | 2628 | nofs | nofs |
| chr09 | E | 9q22.3 | 4 | 99625000 | 3171 | nofs | nofs |
| chr09 | E | 9q31   | 1 | 99875000 | 3366 | nofs | nofs |
| chr09 | E | 9q31   | 1 | 10000000 | 2378 | nofs | nofs |
| chr09 | E | 9q31   | 1 | 10000000 | 3110 | nofs | nofs |
| chr09 | E | 9q31   | 1 | 10100000 | 2648 | nofs | nofs |
| chr09 | E | 9q31   | 1 | 10100000 | 2169 | nofs | nofs |
| chr09 | E | 9q31   | 1 | 10100000 | 2064 | nofs | nofs |

|       |   |      |   |           |       |      |      |
|-------|---|------|---|-----------|-------|------|------|
| chr09 | E | 9q31 | 1 | 101000000 | 2728  | nofs | nofs |
| chr09 | E | 9q31 | 1 | 102000000 | 2078  | nofs | nofs |
| chr09 | E | 9q31 | 1 | 102000000 | 1928  | nofs | nofs |
| chr09 | E | 9q31 | 1 | 102000000 | 2567  | nofs | nofs |
| chr09 | E | 9q31 | 1 | 102000000 | 3511  | nofs | nofs |
| chr09 | E | 9q31 | 1 | 103000000 | 3274  | nofs | nofs |
| chr09 | E | 9q31 | 1 | 103000000 | 5647  | nofs | nofs |
| chr09 | E | 9q31 | 1 | 103000000 | 2801  | nofs | nofs |
| chr09 | E | 9q31 | 1 | 103000000 | 2392  | nofs | nofs |
| chr09 | E | 9q31 | 1 | 104000000 | 2288  | nofs | nofs |
| chr09 | E | 9q31 | 1 | 104000000 | 3082  | nofs | nofs |
| chr09 | E | 9q31 | 1 | 104000000 | 4034  | nofs | nofs |
| chr09 | E | 9q31 | 1 | 104000000 | 3457  | nofs | nofs |
| chr09 | E | 9q31 | 1 | 105000000 | 1796  | nofs | nofs |
| chr09 | E | 9q31 | 1 | 105000000 | 3251  | nofs | nofs |
| chr09 | E | 9q31 | 1 | 105000000 | 2513  | nofs | nofs |
| chr09 | E | 9q31 | 1 | 105000000 | 1448  | nofs | nofs |
| chr09 | E | 9q31 | 1 | 106000000 | 20470 | nofs | nofs |
| chr09 | E | 9q31 | 1 | 106000000 | 2159  | nofs | nofs |
| chr09 | E | 9q31 | 1 | 106000000 | 2702  | nofs | nofs |
| chr09 | E | 9q31 | 1 | 106000000 | 2212  | nofs | nofs |
| chr09 | E | 9q31 | 1 | 107000000 | 2182  | nofs | nofs |
| chr09 | E | 9q31 | 1 | 107000000 | 3733  | nofs | nofs |
| chr09 | E | 9q31 | 1 | 107000000 | 4964  | nofs | nofs |
| chr09 | E | 9q31 | 1 | 107000000 | 3224  | nofs | nofs |
| chr09 | E | 9q31 | 1 | 108000000 | 6330  | nofs | nofs |
| chr09 | E | 9q31 | 1 | 108000000 | 2359  | nofs | nofs |
| chr09 | E | 9q31 | 1 | 108000000 | 2645  | nofs | nofs |
| chr09 | E | 9q31 | 1 | 108000000 | 2715  | nofs | nofs |
| chr09 | E | 9q31 | 1 | 109000000 | 1952  | nofs | nofs |
| chr09 | E | 9q31 | 1 | 109000000 | 1941  | nofs | nofs |
| chr09 | E | 9q31 | 1 | 109000000 | 1745  | nofs | nofs |
| chr09 | E | 9q31 | 1 | 109000000 | 2273  | nofs | nofs |
| chr09 | E | 9q31 | 1 | 110000000 | 2792  | nofs | nofs |
| chr09 | E | 9q31 | 1 | 110000000 | 4134  | nofs | nofs |
| chr09 | E | 9q31 | 1 | 110000000 | 3941  | nofs | nofs |

|       |   |      |   |           |      |      |                    |
|-------|---|------|---|-----------|------|------|--------------------|
| chr09 | E | 9q31 | 1 | 110000000 | 2363 | nofs | nofs               |
| chr09 | E | 9q31 | 1 | 111000000 | 4572 | nofs | nofs               |
| chr09 | E | 9q31 | 1 | 111000000 | 2934 | nofs | nofs               |
| chr09 | E | 9q31 | 1 | 111000000 | 3587 | nofs | nofs               |
| chr09 | E | 9q31 | 1 | 111000000 | 5250 | nofs | nofs               |
| chr09 | E | 9q31 | 1 | 112000000 | 3043 | nofs | nofs               |
| chr09 | E | 9q31 | 1 | 112000000 | 3404 | nofs | nofs               |
| chr09 | E | 9q32 | 1 | 112000000 | 3638 | fs   | fs common and rare |
| chr09 | E | 9q32 | 1 | 112000000 | 3880 | fs   | fs common and rare |
| chr09 | E | 9q32 | 1 | 113000000 | 4335 | fs   | fs common and rare |
| chr09 | E | 9q32 | 1 | 113000000 | 3980 | fs   | fs common and rare |
| chr09 | E | 9q32 | 1 | 113000000 | 2215 | fs   | fs common and rare |
| chr09 | E | 9q32 | 1 | 113000000 | 3122 | fs   | fs common and rare |
| chr09 | E | 9q32 | 1 | 114000000 | 6161 | fs   | fs common and rare |
| chr09 | E | 9q32 | 1 | 114000000 | 2726 | fs   | fs common and rare |
| chr09 | E | 9q32 | 1 | 114000000 | 3800 | fs   | fs common and rare |
| chr09 | E | 9q32 | 1 | 114000000 | 2886 | fs   | fs common and rare |
| chr09 | E | 9q32 | 1 | 115000000 | 2620 | fs   | fs common and rare |
| chr09 | E | 9q32 | 1 | 115000000 | 2985 | fs   | fs common and rare |
| chr09 | E | 9q33 | 4 | 115000000 | 3369 | nofs | nofs               |
| chr09 | E | 9q33 | 4 | 115000000 | 3401 | nofs | nofs               |
| chr09 | E | 9q33 | 4 | 116000000 | 2420 | nofs | nofs               |
| chr09 | E | 9q33 | 4 | 116000000 | 2369 | nofs | nofs               |
| chr09 | E | 9q33 | 4 | 116000000 | 2153 | nofs | nofs               |
| chr09 | E | 9q33 | 4 | 116000000 | 3057 | nofs | nofs               |
| chr09 | E | 9q33 | 4 | 117000000 | 3517 | nofs | nofs               |
| chr09 | E | 9q33 | 4 | 117000000 | 2882 | nofs | nofs               |
| chr09 | E | 9q33 | 4 | 117000000 | 2406 | nofs | nofs               |
| chr09 | E | 9q33 | 4 | 117000000 | 2361 | nofs | nofs               |
| chr09 | E | 9q33 | 4 | 118000000 | 2275 | nofs | nofs               |
| chr09 | E | 9q33 | 4 | 118000000 | 2199 | nofs | nofs               |
| chr09 | E | 9q33 | 4 | 118000000 | 2813 | nofs | nofs               |
| chr09 | E | 9q33 | 4 | 118000000 | 2238 | nofs | nofs               |
| chr09 | E | 9q33 | 4 | 119000000 | 3334 | nofs | nofs               |
| chr09 | E | 9q33 | 4 | 119000000 | 2919 | nofs | nofs               |
| chr09 | E | 9q33 | 4 | 119000000 | 2062 | nofs | nofs               |



|       |   |        |   |           |      |      |      |
|-------|---|--------|---|-----------|------|------|------|
| chr09 | E | 9q33   | 4 | 119000000 | 3299 | nofs | nofs |
| chr09 | E | 9q33   | 4 | 120000000 | 2031 | nofs | nofs |
| chr09 | E | 9q33   | 4 | 120000000 | 2027 | nofs | nofs |
| chr09 | E | 9q33   | 4 | 120000000 | 3270 | nofs | nofs |
| chr09 | E | 9q33   | 4 | 120000000 | 3839 | nofs | nofs |
| chr09 | E | 9q33   | 4 | 121000000 | 3028 | nofs | nofs |
| chr09 | E | 9q33   | 4 | 121000000 | 2531 | nofs | nofs |
| chr09 | E | 9q33   | 4 | 121000000 | 1715 | nofs | nofs |
| chr09 | E | 9q33   | 4 | 121000000 | 3104 | nofs | nofs |
| chr09 | E | 9q33   | 4 | 122000000 | 4073 | nofs | nofs |
| chr09 | E | 9q33   | 4 | 122000000 | 2602 | nofs | nofs |
| chr09 | E | 9q33   | 4 | 122000000 | 2731 | nofs | nofs |
| chr09 | E | 9q33   | 4 | 122000000 | 2384 | nofs | nofs |
| chr09 | E | 9q33   | 4 | 123000000 | 4716 | nofs | nofs |
| chr09 | E | 9q33   | 4 | 123000000 | 2733 | nofs | nofs |
| chr09 | E | 9q33   | 4 | 123000000 | 5561 | nofs | nofs |
| chr09 | E | 9q33   | 4 | 123000000 | 2708 | nofs | nofs |
| chr09 | E | 9q33   | 4 | 124000000 | 1558 | nofs | nofs |
| chr09 | E | 9q33   | 4 | 124000000 | 6486 | nofs | nofs |
| chr09 | E | 9q33   | 4 | 124000000 | 1840 | nofs | nofs |
| chr09 | E | 9q33   | 4 | 124000000 | 3483 | nofs | nofs |
| chr09 | E | 9q33   | 4 | 125000000 | 5112 | nofs | nofs |
| chr09 | E | 9q33   | 4 | 125000000 | 4310 | nofs | nofs |
| chr09 | E | 9q33   | 4 | 125000000 | 3019 | nofs | nofs |
| chr09 | E | 9q33   | 4 | 125000000 | 4887 | nofs | nofs |
| chr09 | E | 9q33   | 4 | 126000000 | 3900 | nofs | nofs |
| chr09 | E | 9q33   | 4 | 126000000 | 4235 | nofs | nofs |
| chr09 | E | 9q33   | 4 | 126000000 | 3272 | nofs | nofs |
| chr09 | E | 9q33   | 4 | 126000000 | 3524 | nofs | nofs |
| chr09 | E | 9q33   | 4 | 127000000 | 5121 | nofs | nofs |
| chr09 | E | 9q33   | 4 | 127000000 | 1564 | nofs | nofs |
| chr09 | E | 9q33   | 4 | 127000000 | 1872 | nofs | nofs |
| chr09 | E | 9q33   | 4 | 127000000 | 6030 | nofs | nofs |
| chr09 | E | 9q34.1 | 3 | 128000000 | 4750 | nofs | nofs |
| chr09 | E | 9q34.1 | 3 | 128000000 | 5963 | nofs | nofs |
| chr09 | E | 9q34.1 | 3 | 128000000 | 5602 | nofs | nofs |

|       |   |        |   |           |       |      |      |
|-------|---|--------|---|-----------|-------|------|------|
| chr09 | E | 9q34.1 | 3 | 128000000 | 6157  | nofs | nofs |
| chr09 | E | 9q34.1 | 3 | 129000000 | 8248  | nofs | nofs |
| chr09 | E | 9q34.1 | 3 | 129000000 | 7938  | nofs | nofs |
| chr09 | E | 9q34.1 | 3 | 129000000 | 9004  | nofs | nofs |
| chr09 | E | 9q34.1 | 3 | 129000000 | 7687  | nofs | nofs |
| chr09 | E | 9q34.1 | 3 | 130000000 | 4602  | nofs | nofs |
| chr09 | E | 9q34.1 | 3 | 130000000 | 2941  | nofs | nofs |
| chr09 | E | 9q34.1 | 3 | 130000000 | 3257  | nofs | nofs |
| chr09 | E | 9q34.1 | 3 | 130000000 | 6018  | nofs | nofs |
| chr09 | E | 9q34.1 | 3 | 131000000 | 5304  | nofs | nofs |
| chr09 | E | 9q34.1 | 3 | 131000000 | 7910  | nofs | nofs |
| chr09 | E | 9q34.1 | 3 | 131000000 | 3991  | nofs | nofs |
| chr09 | E | 9q34.1 | 3 | 131000000 | 7638  | nofs | nofs |
| chr09 | E | 9q34.1 | 3 | 132000000 | 2641  | nofs | nofs |
| chr09 | E | 9q34.1 | 3 | 132000000 | 3634  | nofs | nofs |
| chr09 | E | 9q34.1 | 3 | 132000000 | 4863  | nofs | nofs |
| chr09 | E | 9q34.1 | 3 | 132000000 | 6255  | nofs | nofs |
| chr09 | E | 9q34.1 | 3 | 133000000 | 4061  | nofs | nofs |
| chr09 | E | 9q34.1 | 3 | 133000000 | 4031  | nofs | nofs |
| chr09 | E | 9q34.1 | 3 | 133000000 | 7693  | nofs | nofs |
| chr09 | B | 9q34.2 | . | 133000000 | 8502  | nofs | nofs |
| chr09 | B | 9q34.2 | . | 134000000 | 9795  | nofs | nofs |
| chr09 | B | 9q34.2 | . | 134000000 | 14278 | nofs | nofs |
| chr09 | B | 9q34.2 | . | 134000000 | 4364  | nofs | nofs |
| chr09 | B | 9q34.2 | . | 134000000 | 7762  | nofs | nofs |
| chr09 | E | 9q34.3 | 1 | 135000000 | 18610 | nofs | nofs |
| chr09 | E | 9q34.3 | 1 | 135000000 | 21200 | nofs | nofs |
| chr09 | T | 9q34.3 | 1 | 135000000 | 14898 | nofs | nofs |
| chr09 | T | 9q34.3 | 1 | 135000000 | 15447 | nofs | nofs |
| chr09 | T | 9q34.3 | 1 | 136000000 | 12999 | nofs | nofs |
| chr09 | T | 9q34.3 | 1 | 136000000 | 13204 | nofs | nofs |
| chr09 | T | 9q34.3 | 1 | 136000000 | 8524  | nofs | nofs |
| chr09 | T | 9q34.3 | 1 | 136000000 | 7357  | nofs | nofs |
| chr09 | T | 9q34.3 | 1 | 137000000 | 8704  | nofs | nofs |
| chr09 | T | 9q34.3 | 1 | 137000000 | 18333 | nofs | nofs |
| chr09 | T | 9q34.3 | 1 | 137000000 | 9148  | nofs | nofs |

|       |   |        |   |           |       |      |      |
|-------|---|--------|---|-----------|-------|------|------|
| chr09 | T | 9q34.3 | 1 | 137000000 | 14520 | nofs | nofs |
| chr09 | T | 9q34.3 | 1 | 138000000 | 34092 | nofs | nofs |
| chr09 | T | 9q34.3 | 1 | 138000000 | 17202 | nofs | nofs |
| chr09 | T | 9q34.3 | 1 | 138000000 | 16993 | nofs | nofs |
| chr10 | T | 10p15  | 2 | 125000    | 4689  | nofs | nofs |
| chr10 | T | 10p15  | 2 | 375000    | 28467 | nofs | nofs |
| chr10 | T | 10p15  | 2 | 625000    | 31756 | nofs | nofs |
| chr10 | T | 10p15  | 2 | 875000    | 21254 | nofs | nofs |
| chr10 | T | 10p15  | 2 | 1125000   | 18044 | nofs | nofs |
| chr10 | T | 10p15  | 2 | 1375000   | 22386 | nofs | nofs |
| chr10 | T | 10p15  | 2 | 1625000   | 25883 | nofs | nofs |
| chr10 | T | 10p15  | 2 | 1875000   | 7330  | nofs | nofs |
| chr10 | T | 10p15  | 2 | 2125000   | 9367  | nofs | nofs |
| chr10 | T | 10p15  | 2 | 2375000   | 9521  | nofs | nofs |
| chr10 | T | 10p15  | 2 | 2625000   | 11442 | nofs | nofs |
| chr10 | T | 10p15  | 2 | 2875000   | 7258  | nofs | nofs |
| chr10 | T | 10p15  | 2 | 3125000   | 10126 | nofs | nofs |
| chr10 | E | 10p15  | 2 | 3375000   | 15518 | nofs | nofs |
| chr10 | E | 10p15  | 2 | 3625000   | 7318  | nofs | nofs |
| chr10 | E | 10p15  | 2 | 3875000   | 4510  | nofs | nofs |
| chr10 | E | 10p15  | 2 | 4125000   | 4706  | nofs | nofs |
| chr10 | E | 10p15  | 2 | 4375000   | 4593  | nofs | nofs |
| chr10 | E | 10p15  | 2 | 4625000   | 2653  | nofs | nofs |
| chr10 | E | 10p15  | 2 | 4875000   | 3680  | nofs | nofs |
| chr10 | E | 10p15  | 2 | 5125000   | 2151  | nofs | nofs |
| chr10 | E | 10p15  | 2 | 5375000   | 5343  | nofs | nofs |
| chr10 | E | 10p15  | 2 | 5625000   | 8666  | nofs | nofs |
| chr10 | E | 10p15  | 2 | 5875000   | 3187  | nofs | nofs |
| chr10 | E | 10p15  | 2 | 6125000   | 4703  | nofs | nofs |
| chr10 | E | 10p15  | 2 | 6375000   | 6915  | nofs | nofs |
| chr10 | E | 10p15  | 2 | 6625000   | 4103  | nofs | nofs |
| chr10 | E | 10p14  | 2 | 6875000   | 6769  | nofs | nofs |
| chr10 | E | 10p14  | 2 | 7125000   | 4869  | nofs | nofs |
| chr10 | E | 10p14  | 2 | 7375000   | 4957  | nofs | nofs |
| chr10 | E | 10p14  | 2 | 7625000   | 7234  | nofs | nofs |
| chr10 | E | 10p14  | 2 | 7875000   | 4961  | nofs | nofs |

|       |   |       |   |          |      |      |      |
|-------|---|-------|---|----------|------|------|------|
| chr10 | E | 10p14 | 2 | 8125000  | 5696 | nofs | nofs |
| chr10 | E | 10p14 | 2 | 8375000  | 7259 | nofs | nofs |
| chr10 | E | 10p14 | 2 | 8625000  | 3704 | nofs | nofs |
| chr10 | E | 10p14 | 2 | 8875000  | 3561 | nofs | nofs |
| chr10 | E | 10p14 | 2 | 9125000  | 3571 | nofs | nofs |
| chr10 | E | 10p14 | 2 | 9375000  | 5571 | nofs | nofs |
| chr10 | E | 10p14 | 2 | 9625000  | 3118 | nofs | nofs |
| chr10 | E | 10p14 | 2 | 9875000  | 3263 | nofs | nofs |
| chr10 | E | 10p14 | 2 | 10125000 | 2415 | nofs | nofs |
| chr10 | E | 10p14 | 2 | 10375000 | 4864 | nofs | nofs |
| chr10 | E | 10p14 | 2 | 10625000 | 2391 | nofs | nofs |
| chr10 | E | 10p14 | 2 | 10875000 | 2657 | nofs | nofs |
| chr10 | E | 10p14 | 2 | 11125000 | 2704 | nofs | nofs |
| chr10 | E | 10p14 | 2 | 11375000 | 5386 | nofs | nofs |
| chr10 | E | 10p14 | 2 | 11625000 | 2725 | nofs | nofs |
| chr10 | E | 10p14 | 2 | 11875000 | 4481 | nofs | nofs |
| chr10 | E | 10p14 | 2 | 12125000 | 3835 | nofs | nofs |
| chr10 | E | 10p14 | 2 | 12375000 | 6424 | nofs | nofs |
| chr10 | E | 10p13 | 3 | 12625000 | 6223 | nofs | nofs |
| chr10 | E | 10p13 | 3 | 12875000 | 5000 | nofs | nofs |
| chr10 | E | 10p13 | 3 | 13125000 | 3291 | nofs | nofs |
| chr10 | E | 10p13 | 3 | 13375000 | 5423 | nofs | nofs |
| chr10 | E | 10p13 | 3 | 13625000 | 4575 | nofs | nofs |
| chr10 | E | 10p13 | 3 | 13875000 | 4193 | nofs | nofs |
| chr10 | E | 10p13 | 3 | 14125000 | 5004 | nofs | nofs |
| chr10 | E | 10p13 | 3 | 14375000 | 2457 | nofs | nofs |
| chr10 | E | 10p13 | 3 | 14625000 | 2446 | nofs | nofs |
| chr10 | E | 10p13 | 3 | 14875000 | 3704 | nofs | nofs |
| chr10 | E | 10p13 | 3 | 15125000 | 7449 | nofs | nofs |
| chr10 | E | 10p13 | 3 | 15375000 | 4199 | nofs | nofs |
| chr10 | E | 10p13 | 3 | 15625000 | 2856 | nofs | nofs |
| chr10 | E | 10p13 | 3 | 15875000 | 3246 | nofs | nofs |
| chr10 | E | 10p13 | 3 | 16125000 | 1761 | nofs | nofs |
| chr10 | E | 10p13 | 3 | 16375000 | 3002 | nofs | nofs |
| chr10 | E | 10p13 | 3 | 16625000 | 2714 | nofs | nofs |
| chr10 | E | 10p13 | 3 | 16875000 | 3841 | nofs | nofs |

|       |   |         |   |          |       |      |      |
|-------|---|---------|---|----------|-------|------|------|
| chr10 | E | 10p13   | 3 | 17125000 | 2913  | nofs | nofs |
| chr10 | E | 10p13   | 3 | 17375000 | 4912  | nofs | nofs |
| chr10 | E | 10p12.3 | 2 | 17625000 | 4447  | nofs | nofs |
| chr10 | E | 10p12.3 | 2 | 17875000 | 2862  | nofs | nofs |
| chr10 | E | 10p12.3 | 2 | 18125000 | 3189  | nofs | nofs |
| chr10 | E | 10p12.3 | 2 | 18375000 | 3711  | nofs | nofs |
| chr10 | E | 10p12.3 | 2 | 18625000 | 2635  | nofs | nofs |
| chr10 | E | 10p12.3 | 2 | 18875000 | 22924 | nofs | nofs |
| chr10 | E | 10p12.3 | 2 | 19125000 | 4127  | nofs | nofs |
| chr10 | E | 10p12.3 | 2 | 19375000 | 2684  | nofs | nofs |
| chr10 | E | 10p12.3 | 2 | 19625000 | 6443  | nofs | nofs |
| chr10 | E | 10p12.3 | 2 | 19875000 | 3083  | nofs | nofs |
| chr10 | E | 10p12.3 | 2 | 20125000 | 4125  | nofs | nofs |
| chr10 | E | 10p12.3 | 2 | 20375000 | 4431  | nofs | nofs |
| chr10 | E | 10p12.3 | 2 | 20625000 | 2115  | nofs | nofs |
| chr10 | E | 10p12.3 | 2 | 20875000 | 2562  | nofs | nofs |
| chr10 | E | 10p12.3 | 2 | 21125000 | 1371  | nofs | nofs |
| chr10 | E | 10p12.3 | 2 | 21375000 | 2031  | nofs | nofs |
| chr10 | E | 10p12.3 | 2 | 21625000 | 5549  | nofs | nofs |
| chr10 | E | 10p12.3 | 2 | 21875000 | 3406  | nofs | nofs |
| chr10 | E | 10p12.3 | 2 | 22125000 | 4000  | nofs | nofs |
| chr10 | E | 10p12.3 | 2 | 22375000 | 1734  | nofs | nofs |
| chr10 | E | 10p12.3 | 2 | 22625000 | 2465  | nofs | nofs |
| chr10 | B | 10p12.2 | . | 22875000 | 2001  | nofs | nofs |
| chr10 | B | 10p12.2 | . | 23125000 | 1915  | nofs | nofs |
| chr10 | B | 10p12.2 | . | 23375000 | 4429  | nofs | nofs |
| chr10 | B | 10p12.2 | . | 23625000 | 4382  | nofs | nofs |
| chr10 | B | 10p12.2 | . | 23875000 | 2673  | nofs | nofs |
| chr10 | B | 10p12.2 | . | 24125000 | 3576  | nofs | nofs |
| chr10 | B | 10p12.2 | . | 24375000 | 1966  | nofs | nofs |
| chr10 | E | 10p12.1 | 4 | 24625000 | 3413  | nofs | nofs |
| chr10 | E | 10p12.1 | 4 | 24875000 | 4431  | nofs | nofs |
| chr10 | E | 10p12.1 | 4 | 25125000 | 3496  | nofs | nofs |
| chr10 | E | 10p12.1 | 4 | 25375000 | 3280  | nofs | nofs |
| chr10 | E | 10p12.1 | 4 | 25625000 | 2072  | nofs | nofs |
| chr10 | E | 10p12.1 | 4 | 25875000 | 1769  | nofs | nofs |

|       |   |         |   |          |      |      |      |
|-------|---|---------|---|----------|------|------|------|
| chr10 | E | 10p12.1 | 4 | 26125000 | 4434 | nofs | nofs |
| chr10 | E | 10p12.1 | 4 | 26375000 | 2335 | nofs | nofs |
| chr10 | E | 10p12.1 | 4 | 26625000 | 3105 | nofs | nofs |
| chr10 | E | 10p12.1 | 4 | 26875000 | 3425 | nofs | nofs |
| chr10 | E | 10p12.1 | 4 | 27125000 | 3760 | nofs | nofs |
| chr10 | E | 10p12.1 | 4 | 27375000 | 3159 | nofs | nofs |
| chr10 | E | 10p12.1 | 4 | 27625000 | 4880 | nofs | nofs |
| chr10 | E | 10p12.1 | 4 | 27875000 | 4268 | nofs | nofs |
| chr10 | E | 10p12.1 | 4 | 28125000 | 4118 | nofs | nofs |
| chr10 | E | 10p12.1 | 4 | 28375000 | 3086 | nofs | nofs |
| chr10 | E | 10p12.1 | 4 | 28625000 | 3985 | nofs | nofs |
| chr10 | E | 10p12.1 | 4 | 28875000 | 3247 | nofs | nofs |
| chr10 | E | 10p12.1 | 4 | 29125000 | 5896 | nofs | nofs |
| chr10 | E | 10p12.1 | 4 | 29375000 | 2995 | nofs | nofs |
| chr10 | E | 10p12.1 | 4 | 29625000 | 3989 | nofs | nofs |
| chr10 | E | 10p11.2 | 5 | 29875000 | 3534 | nofs | nofs |
| chr10 | E | 10p11.2 | 5 | 30125000 | 4643 | nofs | nofs |
| chr10 | E | 10p11.2 | 5 | 30375000 | 5028 | nofs | nofs |
| chr10 | E | 10p11.2 | 5 | 30625000 | 3348 | nofs | nofs |
| chr10 | E | 10p11.2 | 5 | 30875000 | 3918 | nofs | nofs |
| chr10 | E | 10p11.2 | 5 | 31125000 | 5876 | nofs | nofs |
| chr10 | E | 10p11.2 | 5 | 31375000 | 2640 | nofs | nofs |
| chr10 | E | 10p11.2 | 5 | 31625000 | 2481 | nofs | nofs |
| chr10 | E | 10p11.2 | 5 | 31875000 | 2308 | nofs | nofs |
| chr10 | E | 10p11.2 | 5 | 32125000 | 2219 | nofs | nofs |
| chr10 | E | 10p11.2 | 5 | 32375000 | 4873 | nofs | nofs |
| chr10 | E | 10p11.2 | 5 | 32625000 | 4216 | nofs | nofs |
| chr10 | E | 10p11.2 | 5 | 32875000 | 3241 | nofs | nofs |
| chr10 | E | 10p11.2 | 5 | 33125000 | 2709 | nofs | nofs |
| chr10 | E | 10p11.2 | 5 | 33375000 | 3800 | nofs | nofs |
| chr10 | E | 10p11.2 | 5 | 33625000 | 2197 | nofs | nofs |
| chr10 | E | 10p11.2 | 5 | 33875000 | 3619 | nofs | nofs |
| chr10 | E | 10p11.2 | 5 | 34125000 | 3411 | nofs | nofs |
| chr10 | E | 10p11.2 | 5 | 34375000 | 4138 | nofs | nofs |
| chr10 | E | 10p11.2 | 5 | 34625000 | 2598 | nofs | nofs |
| chr10 | E | 10p11.2 | 5 | 34875000 | 3198 | nofs | nofs |

|       |   |         |   |          |        |           |           |
|-------|---|---------|---|----------|--------|-----------|-----------|
| chr10 | E | 10p11.2 | 5 | 35125000 | 3979   | nofs      | nofs      |
| chr10 | E | 10p11.2 | 5 | 35375000 | 3263   | nofs      | nofs      |
| chr10 | E | 10p11.2 | 5 | 35625000 | 5189   | nofs      | nofs      |
| chr10 | E | 10p11.2 | 5 | 35875000 | 6336   | nofs      | nofs      |
| chr10 | E | 10p11.2 | 5 | 36125000 | 3255   | nofs      | nofs      |
| chr10 | C | 10p11.2 | 5 | 36375000 | 1598   | nofs      | nofs      |
| chr10 | C | 10p11.2 | 5 | 36625000 | 3056   | nofs      | nofs      |
| chr10 | C | 10p11.2 | 5 | 36875000 | 2911   | nofs      | nofs      |
| chr10 | C | 10p11.2 | 5 | 37125000 | 4693   | nofs      | nofs      |
| chr10 | C | 10p11.2 | 5 | 37375000 | 2971   | nofs      | nofs      |
| chr10 | C | 10p11.2 | 5 | 37625000 | 2458   | nofs      | nofs      |
| chr10 | C | 10p11.2 | 5 | 37875000 | 2537   | nofs      | nofs      |
| chr10 | C | 10p11.2 | 5 | 38125000 | 3507   | nofs      | nofs      |
| chr10 | C | 10p11.2 | 5 | 38375000 | 4723   | nofs      | nofs      |
| chr10 | C | 10p11.2 | 5 | 38375000 | 4723   | nofs      | nofs      |
| chr10 | C | 10p11.2 | 5 | 38625000 | 3059   | nofs      | nofs      |
| chr10 | C | 10p11.2 | 5 | 38875000 | 69385  | nofs      | nofs      |
| chr10 | C | 10p11.2 | 5 | 39125000 | 81912  | nofs      | nofs      |
| chr10 | C |         | . | 39375000 | 0      | nofs      | nofs      |
| chr10 | C |         | . | 39625000 | 0      | nofs      | nofs      |
| chr10 | C |         | . | 39875000 | 0      | nofs      | nofs      |
| chr10 | C |         | . | 40125000 | 0      | nofs      | nofs      |
| chr10 | C |         | . | 40375000 | 0      | nofs      | nofs      |
| chr10 | C |         | . | 40625000 | 0      | nofs      | nofs      |
| chr10 | C |         | . | 40875000 | 0      | nofs      | nofs      |
| chr10 | C |         | . | 41125000 | 0      | nofs      | nofs      |
| chr10 | C |         | . | 41375000 | 0      | nofs      | nofs      |
| chr10 | C | 10q11.2 | 6 | 41625000 | 73304  | fs common | fs common |
| chr10 | C | 10q11.2 | 6 | 41875000 | 109487 | fs common | fs common |
| chr10 | C | 10q11.2 | 6 | 42125000 | 35915  | fs common | fs common |
| chr10 | C | 10q11.2 | 6 | 42375000 | 3185   | fs common | fs common |
| chr10 | C | 10q11.2 | 6 | 42625000 | 3990   | fs common | fs common |
| chr10 | C | 10q11.2 | 6 | 42875000 | 3424   | fs common | fs common |
| chr10 | C | 10q11.2 | 6 | 43125000 | 5337   | fs common | fs common |
| chr10 | C | 10q11.2 | 6 | 43375000 | 7245   | fs common | fs common |
| chr10 | C | 10q11.2 | 6 | 43625000 | 4054   | fs common | fs common |

|       |   |         |   |          |      |    |           |
|-------|---|---------|---|----------|------|----|-----------|
| chr10 | C | 10q11.2 | 6 | 43875000 | 2007 | fs | fs common |
| chr10 | C | 10q11.2 | 6 | 44125000 | 2700 | fs | fs common |
| chr10 | C | 10q11.2 | 6 | 44375000 | 1666 | fs | fs common |
| chr10 | C | 10q11.2 | 6 | 44625000 | 4386 | fs | fs common |
| chr10 | E | 10q11.2 | 6 | 44875000 | 4510 | fs | fs common |
| chr10 | E | 10q11.2 | 6 | 45125000 | 5564 | fs | fs common |
| chr10 | E | 10q11.2 | 6 | 45375000 | 2849 | fs | fs common |
| chr10 | E | 10q11.2 | 6 | 45625000 | 6028 | fs | fs common |
| chr10 | E | 10q11.2 | 6 | 45875000 | 1648 | fs | fs common |
| chr10 | E | 10q11.2 | 6 | 46125000 | 3269 | fs | fs common |
| chr10 | E | 10q11.2 | 6 | 46375000 | 4138 | fs | fs common |
| chr10 | E | 10q11.2 | 6 | 46625000 | 3790 | fs | fs common |
| chr10 | E | 10q11.2 | 6 | 46875000 | 758  | fs | fs common |
| chr10 | E | 10q11.2 | 6 | 47125000 | 7027 | fs | fs common |
| chr10 | E | 10q11.2 | 6 | 47375000 | 775  | fs | fs common |
| chr10 | E | 10q11.2 | 6 | 47625000 | 1004 | fs | fs common |
| chr10 | E | 10q11.2 | 6 | 47875000 | 7238 | fs | fs common |
| chr10 | E | 10q11.2 | 6 | 48125000 | 5013 | fs | fs common |
| chr10 | E | 10q11.2 | 6 | 48375000 | 2776 | fs | fs common |
| chr10 | E | 10q11.2 | 6 | 48625000 | 3077 | fs | fs common |
| chr10 | E | 10q11.2 | 6 | 48875000 | 2117 | fs | fs common |
| chr10 | E | 10q11.2 | 6 | 49125000 | 1864 | fs | fs common |
| chr10 | E | 10q11.2 | 6 | 49375000 | 1769 | fs | fs common |
| chr10 | E | 10q11.2 | 6 | 49625000 | 5634 | fs | fs common |
| chr10 | E | 10q11.2 | 6 | 49875000 | 3603 | fs | fs common |
| chr10 | E | 10q11.2 | 6 | 50125000 | 3014 | fs | fs common |
| chr10 | E | 10q11.2 | 6 | 50375000 | 2753 | fs | fs common |
| chr10 | E | 10q11.2 | 6 | 50625000 | 4207 | fs | fs common |
| chr10 | E | 10q11.2 | 6 | 50875000 | 4790 | fs | fs common |
| chr10 | E | 10q11.2 | 6 | 51125000 | 2919 | fs | fs common |
| chr10 | E | 10q11.2 | 6 | 51375000 | 5086 | fs | fs common |
| chr10 | E | 10q11.2 | 6 | 51625000 | 2174 | fs | fs common |
| chr10 | E | 10q11.2 | 6 | 51875000 | 2422 | fs | fs common |
| chr10 | E | 10q11.2 | 6 | 52125000 | 1403 | fs | fs common |
| chr10 | E | 10q11.2 | 6 | 52375000 | 2645 | fs | fs common |
| chr10 | E | 10q11.2 | 6 | 52625000 | 2624 | fs | fs common |



|       |   |         |   |          |      |    |           |
|-------|---|---------|---|----------|------|----|-----------|
| chr10 | E | 10q21.1 | 4 | 52875000 | 2861 | fs | fs common |
| chr10 | E | 10q21.1 | 4 | 53125000 | 2819 | fs | fs common |
| chr10 | E | 10q21.1 | 4 | 53375000 | 2785 | fs | fs common |
| chr10 | E | 10q21.1 | 4 | 53625000 | 3155 | fs | fs common |
| chr10 | E | 10q21.1 | 4 | 53875000 | 2225 | fs | fs common |
| chr10 | E | 10q21.1 | 4 | 54125000 | 2065 | fs | fs common |
| chr10 | E | 10q21.1 | 4 | 54375000 | 2643 | fs | fs common |
| chr10 | E | 10q21.1 | 4 | 54625000 | 1372 | fs | fs common |
| chr10 | E | 10q21.1 | 4 | 54875000 | 3238 | fs | fs common |
| chr10 | E | 10q21.1 | 4 | 55125000 | 2362 | fs | fs common |
| chr10 | E | 10q21.1 | 4 | 55375000 | 3290 | fs | fs common |
| chr10 | E | 10q21.1 | 4 | 55625000 | 3061 | fs | fs common |
| chr10 | E | 10q21.1 | 4 | 55875000 | 2903 | fs | fs common |
| chr10 | E | 10q21.1 | 4 | 56125000 | 2960 | fs | fs common |
| chr10 | E | 10q21.1 | 4 | 56375000 | 4419 | fs | fs common |
| chr10 | E | 10q21.1 | 4 | 56625000 | 1763 | fs | fs common |
| chr10 | E | 10q21.1 | 4 | 56875000 | 4839 | fs | fs common |
| chr10 | E | 10q21.1 | 4 | 57125000 | 1740 | fs | fs common |
| chr10 | E | 10q21.1 | 4 | 57375000 | 2555 | fs | fs common |
| chr10 | E | 10q21.1 | 4 | 57625000 | 3273 | fs | fs common |
| chr10 | E | 10q21.1 | 4 | 57875000 | 2297 | fs | fs common |
| chr10 | E | 10q21.1 | 4 | 58125000 | 2252 | fs | fs common |
| chr10 | E | 10q21.1 | 4 | 58375000 | 1944 | fs | fs common |
| chr10 | E | 10q21.1 | 4 | 58625000 | 2260 | fs | fs common |
| chr10 | E | 10q21.1 | 4 | 58875000 | 4966 | fs | fs common |
| chr10 | E | 10q21.1 | 4 | 59125000 | 3681 | fs | fs common |
| chr10 | E | 10q21.1 | 4 | 59375000 | 2349 | fs | fs common |
| chr10 | E | 10q21.1 | 4 | 59625000 | 3408 | fs | fs common |
| chr10 | E | 10q21.1 | 4 | 59875000 | 2822 | fs | fs common |
| chr10 | E | 10q21.1 | 4 | 60125000 | 2547 | fs | fs common |
| chr10 | E | 10q21.1 | 4 | 60375000 | 1648 | fs | fs common |
| chr10 | E | 10q21.1 | 4 | 60625000 | 2673 | fs | fs common |
| chr10 | E | 10q21.1 | 4 | 60875000 | 2069 | fs | fs common |
| chr10 | E | 10q21.2 | 2 | 61125000 | 3450 | fs | fs common |
| chr10 | E | 10q21.2 | 2 | 61375000 | 2489 | fs | fs common |
| chr10 | E | 10q21.2 | 2 | 61625000 | 2267 | fs | fs common |

|       |   |         |   |          |      |    |           |
|-------|---|---------|---|----------|------|----|-----------|
| chr10 | E | 10q21.2 | 2 | 61875000 | 2274 | fs | fs common |
| chr10 | E | 10q21.2 | 2 | 62125000 | 1867 | fs | fs common |
| chr10 | E | 10q21.2 | 2 | 62375000 | 1967 | fs | fs common |
| chr10 | E | 10q21.2 | 2 | 62625000 | 1616 | fs | fs common |
| chr10 | E | 10q21.2 | 2 | 62875000 | 3171 | fs | fs common |
| chr10 | E | 10q21.2 | 2 | 63125000 | 2453 | fs | fs common |
| chr10 | E | 10q21.2 | 2 | 63375000 | 2123 | fs | fs common |
| chr10 | E | 10q21.2 | 2 | 63625000 | 2500 | fs | fs common |
| chr10 | E | 10q21.2 | 2 | 63875000 | 3026 | fs | fs common |
| chr10 | E | 10q21.2 | 2 | 64125000 | 2031 | fs | fs common |
| chr10 | E | 10q21.3 | 2 | 64375000 | 4395 | fs | fs common |
| chr10 | E | 10q21.3 | 2 | 64625000 | 2508 | fs | fs common |
| chr10 | E | 10q21.3 | 2 | 64875000 | 2695 | fs | fs common |
| chr10 | E | 10q21.3 | 2 | 65125000 | 2860 | fs | fs common |
| chr10 | E | 10q21.3 | 2 | 65375000 | 1272 | fs | fs common |
| chr10 | E | 10q21.3 | 2 | 65625000 | 2298 | fs | fs common |
| chr10 | E | 10q21.3 | 2 | 65875000 | 3342 | fs | fs common |
| chr10 | E | 10q21.3 | 2 | 66125000 | 2328 | fs | fs common |
| chr10 | E | 10q21.3 | 2 | 66375000 | 2244 | fs | fs common |
| chr10 | E | 10q21.3 | 2 | 66625000 | 3251 | fs | fs common |
| chr10 | E | 10q21.3 | 2 | 66875000 | 2312 | fs | fs common |
| chr10 | E | 10q21.3 | 2 | 67125000 | 2141 | fs | fs common |
| chr10 | E | 10q21.3 | 2 | 67375000 | 1728 | fs | fs common |
| chr10 | E | 10q21.3 | 2 | 67625000 | 2189 | fs | fs common |
| chr10 | E | 10q21.3 | 2 | 67875000 | 2364 | fs | fs common |
| chr10 | E | 10q21.3 | 2 | 68125000 | 2133 | fs | fs common |
| chr10 | E | 10q21.3 | 2 | 68375000 | 1696 | fs | fs common |
| chr10 | E | 10q21.3 | 2 | 68625000 | 1406 | fs | fs common |
| chr10 | E | 10q21.3 | 2 | 68875000 | 2169 | fs | fs common |
| chr10 | E | 10q21.3 | 2 | 69125000 | 5556 | fs | fs common |
| chr10 | E | 10q21.3 | 2 | 69375000 | 3658 | fs | fs common |
| chr10 | E | 10q21.3 | 2 | 69625000 | 3021 | fs | fs common |
| chr10 | E | 10q21.3 | 2 | 69875000 | 4988 | fs | fs common |
| chr10 | E | 10q21.3 | 2 | 70125000 | 5920 | fs | fs common |
| chr10 | E | 10q21.3 | 2 | 70375000 | 6012 | fs | fs common |
| chr10 | E | 10q22.1 | 2 | 70625000 | 2416 | fs | fs common |

|       |   |         |   |          |      |      |           |
|-------|---|---------|---|----------|------|------|-----------|
| chr10 | E | 10q22.1 | 2 | 70875000 | 2798 | fs   | fs common |
| chr10 | E | 10q22.1 | 2 | 71125000 | 2707 | fs   | fs common |
| chr10 | E | 10q22.1 | 2 | 71375000 | 4141 | fs   | fs common |
| chr10 | E | 10q22.1 | 2 | 71625000 | 4749 | fs   | fs common |
| chr10 | E | 10q22.1 | 2 | 71875000 | 4526 | fs   | fs common |
| chr10 | E | 10q22.1 | 2 | 72125000 | 6069 | fs   | fs common |
| chr10 | E | 10q22.1 | 2 | 72375000 | 4632 | fs   | fs common |
| chr10 | E | 10q22.1 | 2 | 72625000 | 2175 | fs   | fs common |
| chr10 | E | 10q22.1 | 2 | 72875000 | 2409 | fs   | fs common |
| chr10 | E | 10q22.1 | 2 | 73125000 | 3605 | fs   | fs common |
| chr10 | E | 10q22.1 | 2 | 73375000 | 4042 | fs   | fs common |
| chr10 | E | 10q22.1 | 2 | 73625000 | 4494 | fs   | fs common |
| chr10 | E | 10q22.1 | 2 | 73875000 | 2854 | fs   | fs common |
| chr10 | E | 10q22.1 | 2 | 74125000 | 3786 | fs   | fs common |
| chr10 | E | 10q22.1 | 2 | 74375000 | 2431 | fs   | fs common |
| chr10 | E | 10q22.1 | 2 | 74625000 | 2800 | fs   | fs common |
| chr10 | E | 10q22.2 | 3 | 74875000 | 2552 | nofs | nofs      |
| chr10 | E | 10q22.2 | 3 | 75125000 | 5117 | nofs | nofs      |
| chr10 | E | 10q22.2 | 3 | 75375000 | 2810 | nofs | nofs      |
| chr10 | E | 10q22.2 | 3 | 75625000 | 2319 | nofs | nofs      |
| chr10 | E | 10q22.2 | 3 | 75875000 | 1868 | nofs | nofs      |
| chr10 | E | 10q22.2 | 3 | 76125000 | 2302 | nofs | nofs      |
| chr10 | E | 10q22.2 | 3 | 76375000 | 1983 | nofs | nofs      |
| chr10 | E | 10q22.2 | 3 | 76625000 | 2846 | nofs | nofs      |
| chr10 | E | 10q22.2 | 3 | 76875000 | 4531 | nofs | nofs      |
| chr10 | E | 10q22.2 | 3 | 77125000 | 3068 | nofs | nofs      |
| chr10 | E | 10q22.2 | 3 | 77375000 | 2785 | nofs | nofs      |
| chr10 | E | 10q22.2 | 3 | 77625000 | 2380 | nofs | nofs      |
| chr10 | E | 10q22.3 | 3 | 77875000 | 1629 | nofs | nofs      |
| chr10 | E | 10q22.3 | 3 | 78125000 | 4536 | nofs | nofs      |
| chr10 | E | 10q22.3 | 3 | 78375000 | 2716 | nofs | nofs      |
| chr10 | E | 10q22.3 | 3 | 78625000 | 2143 | nofs | nofs      |
| chr10 | E | 10q22.3 | 3 | 78875000 | 3986 | nofs | nofs      |
| chr10 | E | 10q22.3 | 3 | 79125000 | 3669 | nofs | nofs      |
| chr10 | E | 10q22.3 | 3 | 79375000 | 2009 | nofs | nofs      |
| chr10 | E | 10q22.3 | 3 | 79625000 | 3294 | nofs | nofs      |

|       |   |         |   |          |      |      |      |
|-------|---|---------|---|----------|------|------|------|
| chr10 | E | 10q22.3 | 3 | 79875000 | 2775 | nofs | nofs |
| chr10 | E | 10q22.3 | 3 | 80125000 | 2477 | nofs | nofs |
| chr10 | E | 10q22.3 | 3 | 80375000 | 2098 | nofs | nofs |
| chr10 | E | 10q22.3 | 3 | 80625000 | 2380 | nofs | nofs |
| chr10 | E | 10q22.3 | 3 | 80875000 | 6912 | nofs | nofs |
| chr10 | E | 10q22.3 | 3 | 81125000 | 3872 | nofs | nofs |
| chr10 | E | 10q22.3 | 3 | 81375000 | 5048 | nofs | nofs |
| chr10 | E | 10q22.3 | 3 | 81625000 | 2450 | nofs | nofs |
| chr10 | E | 10q22.3 | 3 | 81875000 | 3012 | nofs | nofs |
| chr10 | E | 10q22.3 | 3 | 82125000 | 2708 | nofs | nofs |
| chr10 | E | 10q22.3 | 3 | 82375000 | 5977 | nofs | nofs |
| chr10 | E | 10q22.3 | 3 | 82625000 | 1779 | nofs | nofs |
| chr10 | E | 10q22.3 | 3 | 82875000 | 1650 | nofs | nofs |
| chr10 | E | 10q22.3 | 3 | 83125000 | 5057 | nofs | nofs |
| chr10 | E | 10q23.1 | 1 | 83375000 | 3809 | nofs | nofs |
| chr10 | E | 10q23.1 | 1 | 83625000 | 2231 | nofs | nofs |
| chr10 | E | 10q23.1 | 1 | 83875000 | 2002 | nofs | nofs |
| chr10 | E | 10q23.1 | 1 | 84125000 | 2689 | nofs | nofs |
| chr10 | E | 10q23.1 | 1 | 84375000 | 2982 | nofs | nofs |
| chr10 | E | 10q23.1 | 1 | 84625000 | 2608 | nofs | nofs |
| chr10 | E | 10q23.1 | 1 | 84875000 | 1530 | nofs | nofs |
| chr10 | E | 10q23.1 | 1 | 85125000 | 3075 | nofs | nofs |
| chr10 | E | 10q23.1 | 1 | 85375000 | 1633 | nofs | nofs |
| chr10 | E | 10q23.1 | 1 | 85625000 | 1947 | nofs | nofs |
| chr10 | E | 10q23.1 | 1 | 85875000 | 3371 | nofs | nofs |
| chr10 | E | 10q23.1 | 1 | 86125000 | 4065 | nofs | nofs |
| chr10 | E | 10q23.1 | 1 | 86375000 | 4389 | nofs | nofs |
| chr10 | E | 10q23.1 | 1 | 86625000 | 1938 | nofs | nofs |
| chr10 | E | 10q23.2 | 4 | 86875000 | 2072 | nofs | nofs |
| chr10 | E | 10q23.2 | 4 | 87125000 | 2414 | nofs | nofs |
| chr10 | E | 10q23.2 | 4 | 87375000 | 2423 | nofs | nofs |
| chr10 | E | 10q23.2 | 4 | 87625000 | 3272 | nofs | nofs |
| chr10 | E | 10q23.2 | 4 | 87875000 | 4692 | nofs | nofs |
| chr10 | E | 10q23.2 | 4 | 88125000 | 4016 | nofs | nofs |
| chr10 | E | 10q23.2 | 4 | 88375000 | 3673 | nofs | nofs |
| chr10 | E | 10q23.2 | 4 | 88625000 | 2854 | nofs | nofs |

|       |   |         |   |          |      |         |         |
|-------|---|---------|---|----------|------|---------|---------|
| chr10 | E | 10q23.2 | 4 | 88875000 | 5111 | nofs    | nofs    |
| chr10 | E | 10q23.3 | 4 | 89125000 | 2440 | fs rare | fs rare |
| chr10 | E | 10q23.3 | 4 | 89375000 | 2536 | fs rare | fs rare |
| chr10 | E | 10q23.3 | 4 | 89625000 | 1994 | fs rare | fs rare |
| chr10 | E | 10q23.3 | 4 | 89875000 | 2599 | fs rare | fs rare |
| chr10 | E | 10q23.3 | 4 | 90125000 | 1379 | fs rare | fs rare |
| chr10 | E | 10q23.3 | 4 | 90375000 | 2741 | fs rare | fs rare |
| chr10 | E | 10q23.3 | 4 | 90625000 | 2180 | fs rare | fs rare |
| chr10 | E | 10q23.3 | 4 | 90875000 | 3287 | fs rare | fs rare |
| chr10 | E | 10q23.3 | 4 | 91125000 | 3080 | fs rare | fs rare |
| chr10 | E | 10q23.3 | 4 | 91375000 | 3251 | fs rare | fs rare |
| chr10 | E | 10q23.3 | 4 | 91625000 | 3762 | fs rare | fs rare |
| chr10 | E | 10q23.3 | 4 | 91875000 | 2016 | fs rare | fs rare |
| chr10 | E | 10q23.3 | 4 | 92125000 | 1895 | fs rare | fs rare |
| chr10 | E | 10q23.3 | 4 | 92375000 | 1548 | fs rare | fs rare |
| chr10 | E | 10q23.3 | 4 | 92625000 | 2644 | fs rare | fs rare |
| chr10 | E | 10q23.3 | 4 | 92875000 | 2752 | fs rare | fs rare |
| chr10 | E | 10q23.3 | 4 | 93125000 | 2913 | fs rare | fs rare |
| chr10 | E | 10q23.3 | 4 | 93375000 | 1671 | fs rare | fs rare |
| chr10 | E | 10q23.3 | 4 | 93625000 | 1996 | fs rare | fs rare |
| chr10 | E | 10q23.3 | 4 | 93875000 | 4934 | fs rare | fs rare |
| chr10 | E | 10q23.3 | 4 | 94125000 | 6631 | fs rare | fs rare |
| chr10 | E | 10q23.3 | 4 | 94375000 | 6630 | fs rare | fs rare |
| chr10 | E | 10q23.3 | 4 | 94625000 | 4299 | fs rare | fs rare |
| chr10 | E | 10q23.3 | 4 | 94875000 | 2884 | fs rare | fs rare |
| chr10 | E | 10q23.3 | 4 | 95125000 | 4189 | fs rare | fs rare |
| chr10 | E | 10q23.3 | 4 | 95375000 | 2032 | fs rare | fs rare |
| chr10 | E | 10q23.3 | 4 | 95625000 | 3207 | fs rare | fs rare |
| chr10 | E | 10q23.3 | 4 | 95875000 | 2221 | fs rare | fs rare |
| chr10 | E | 10q23.3 | 4 | 96125000 | 2392 | fs rare | fs rare |
| chr10 | E | 10q23.3 | 4 | 96375000 | 1878 | fs rare | fs rare |
| chr10 | E | 10q23.3 | 4 | 96625000 | 2003 | fs rare | fs rare |
| chr10 | E | 10q23.3 | 4 | 96875000 | 1068 | fs rare | fs rare |
| chr10 | E | 10q23.3 | 4 | 97125000 | 1258 | fs rare | fs rare |
| chr10 | E | 10q23.3 | 4 | 97375000 | 2990 | fs rare | fs rare |
| chr10 | E | 10q24.1 | 2 | 97625000 | 3557 | nofs    | nofs    |

|       |   |         |   |           |      |      |      |
|-------|---|---------|---|-----------|------|------|------|
| chr10 | E | 10q24.1 | 2 | 97875000  | 2317 | nofs | nofs |
| chr10 | E | 10q24.1 | 2 | 98125000  | 2308 | nofs | nofs |
| chr10 | E | 10q24.1 | 2 | 98375000  | 2249 | nofs | nofs |
| chr10 | E | 10q24.1 | 2 | 98625000  | 6691 | nofs | nofs |
| chr10 | E | 10q24.1 | 2 | 98875000  | 3616 | nofs | nofs |
| chr10 | E | 10q24.1 | 2 | 99125000  | 7019 | nofs | nofs |
| chr10 | E | 10q24.1 | 2 | 99375000  | 4456 | nofs | nofs |
| chr10 | E | 10q24.2 | 2 | 99625000  | 3382 | nofs | nofs |
| chr10 | E | 10q24.2 | 2 | 99875000  | 3503 | nofs | nofs |
| chr10 | E | 10q24.2 | 2 | 100000000 | 2874 | nofs | nofs |
| chr10 | E | 10q24.2 | 2 | 100000000 | 1482 | nofs | nofs |
| chr10 | E | 10q24.2 | 2 | 101000000 | 1558 | nofs | nofs |
| chr10 | E | 10q24.2 | 2 | 101000000 | 2332 | nofs | nofs |
| chr10 | E | 10q24.2 | 2 | 101000000 | 2083 | nofs | nofs |
| chr10 | E | 10q24.2 | 2 | 101000000 | 2691 | nofs | nofs |
| chr10 | E | 10q24.2 | 2 | 102000000 | 5311 | nofs | nofs |
| chr10 | E | 10q24.2 | 2 | 102000000 | 3463 | nofs | nofs |
| chr10 | E | 10q24.3 | 2 | 102000000 | 4638 | nofs | nofs |
| chr10 | E | 10q24.3 | 2 | 102000000 | 3668 | nofs | nofs |
| chr10 | E | 10q24.3 | 2 | 103000000 | 2611 | nofs | nofs |
| chr10 | E | 10q24.3 | 2 | 103000000 | 3031 | nofs | nofs |
| chr10 | E | 10q24.3 | 2 | 103000000 | 5031 | nofs | nofs |
| chr10 | E | 10q24.3 | 2 | 103000000 | 2266 | nofs | nofs |
| chr10 | E | 10q24.3 | 2 | 104000000 | 2418 | nofs | nofs |
| chr10 | E | 10q24.3 | 2 | 104000000 | 5353 | nofs | nofs |
| chr10 | E | 10q24.3 | 2 | 104000000 | 2890 | nofs | nofs |
| chr10 | E | 10q24.3 | 2 | 104000000 | 4493 | nofs | nofs |
| chr10 | E | 10q24.3 | 2 | 105000000 | 5424 | nofs | nofs |
| chr10 | E | 10q24.3 | 2 | 105000000 | 3569 | nofs | nofs |
| chr10 | E | 10q24.3 | 2 | 105000000 | 5063 | nofs | nofs |
| chr10 | E | 10q24.3 | 2 | 105000000 | 3556 | nofs | nofs |
| chr10 | E | 10q24.3 | 2 | 106000000 | 1995 | nofs | nofs |
| chr10 | E | 10q25.1 | 1 | 106000000 | 2249 | nofs | nofs |
| chr10 | E | 10q25.1 | 1 | 106000000 | 2289 | nofs | nofs |
| chr10 | E | 10q25.1 | 1 | 106000000 | 3255 | nofs | nofs |
| chr10 | E | 10q25.1 | 1 | 107000000 | 2313 | nofs | nofs |

|       |   |         |   |           |      |      |                    |
|-------|---|---------|---|-----------|------|------|--------------------|
| chr10 | E | 10q25.1 | 1 | 107000000 | 3237 | nofs | nofs               |
| chr10 | E | 10q25.1 | 1 | 107000000 | 2584 | nofs | nofs               |
| chr10 | E | 10q25.1 | 1 | 107000000 | 3802 | nofs | nofs               |
| chr10 | E | 10q25.1 | 1 | 108000000 | 2376 | nofs | nofs               |
| chr10 | E | 10q25.1 | 1 | 108000000 | 3108 | nofs | nofs               |
| chr10 | E | 10q25.1 | 1 | 108000000 | 3131 | nofs | nofs               |
| chr10 | E | 10q25.1 | 1 | 108000000 | 2417 | nofs | nofs               |
| chr10 | E | 10q25.1 | 1 | 109000000 | 2263 | nofs | nofs               |
| chr10 | E | 10q25.1 | 1 | 109000000 | 1582 | nofs | nofs               |
| chr10 | E | 10q25.1 | 1 | 109000000 | 1660 | nofs | nofs               |
| chr10 | E | 10q25.1 | 1 | 109000000 | 1473 | nofs | nofs               |
| chr10 | E | 10q25.1 | 1 | 110000000 | 2677 | nofs | nofs               |
| chr10 | E | 10q25.1 | 1 | 110000000 | 1833 | nofs | nofs               |
| chr10 | E | 10q25.1 | 1 | 110000000 | 2892 | nofs | nofs               |
| chr10 | E | 10q25.1 | 1 | 110000000 | 4313 | nofs | nofs               |
| chr10 | E | 10q25.1 | 1 | 111000000 | 3304 | nofs | nofs               |
| chr10 | E | 10q25.1 | 1 | 111000000 | 3070 | nofs | nofs               |
| chr10 | E | 10q25.1 | 1 | 111000000 | 1847 | nofs | nofs               |
| chr10 | E | 10q25.1 | 1 | 111000000 | 1403 | nofs | nofs               |
| chr10 | E | 10q25.1 | 1 | 112000000 | 2300 | nofs | nofs               |
| chr10 | E | 10q25.1 | 1 | 112000000 | 2333 | nofs | nofs               |
| chr10 | B | 10q25.2 | . | 112000000 | 4807 | fs   | fs common and rare |
| chr10 | B | 10q25.2 | . | 112000000 | 1841 | fs   | fs common and rare |
| chr10 | B | 10q25.2 | . | 113000000 | 2886 | fs   | fs common and rare |
| chr10 | B | 10q25.2 | . | 113000000 | 2457 | fs   | fs common and rare |
| chr10 | B | 10q25.2 | . | 113000000 | 3189 | fs   | fs common and rare |
| chr10 | B | 10q25.2 | . | 113000000 | 2908 | fs   | fs common and rare |
| chr10 | B | 10q25.2 | . | 114000000 | 2276 | fs   | fs common and rare |
| chr10 | B | 10q25.2 | . | 114000000 | 1811 | fs   | fs common and rare |
| chr10 | B | 10q25.2 | . | 114000000 | 4651 | fs   | fs common and rare |
| chr10 | B | 10q25.2 | . | 114000000 | 2747 | fs   | fs common and rare |
| chr10 | B | 10q25.2 | . | 115000000 | 3906 | fs   | fs common and rare |
| chr10 | B | 10q25.2 | . | 115000000 | 2922 | fs   | fs common and rare |
| chr10 | B | 10q25.3 | . | 115000000 | 1771 | nofs | nofs               |
| chr10 | B | 10q25.3 | . | 115000000 | 2668 | nofs | nofs               |
| chr10 | B | 10q25.3 | . | 116000000 | 3531 | nofs | nofs               |

|       |   |         |   |           |      |      |           |
|-------|---|---------|---|-----------|------|------|-----------|
| chr10 | B | 10q25.3 | . | 116000000 | 2833 | nofs | nofs      |
| chr10 | B | 10q25.3 | . | 116000000 | 3345 | nofs | nofs      |
| chr10 | B | 10q25.3 | . | 116000000 | 3952 | nofs | nofs      |
| chr10 | B | 10q25.3 | . | 117000000 | 4691 | nofs | nofs      |
| chr10 | B | 10q25.3 | . | 117000000 | 2142 | nofs | nofs      |
| chr10 | B | 10q25.3 | . | 117000000 | 2031 | nofs | nofs      |
| chr10 | B | 10q25.3 | . | 117000000 | 2407 | nofs | nofs      |
| chr10 | B | 10q25.3 | . | 118000000 | 1623 | nofs | nofs      |
| chr10 | B | 10q25.3 | . | 118000000 | 2399 | nofs | nofs      |
| chr10 | B | 10q25.3 | . | 118000000 | 3213 | nofs | nofs      |
| chr10 | B | 10q25.3 | . | 118000000 | 4152 | nofs | nofs      |
| chr10 | B | 10q25.3 | . | 119000000 | 2210 | nofs | nofs      |
| chr10 | E | 10q26.1 | 3 | 119000000 | 3027 | fs   | fs common |
| chr10 | E | 10q26.1 | 3 | 119000000 | 3543 | fs   | fs common |
| chr10 | E | 10q26.1 | 3 | 119000000 | 2164 | fs   | fs common |
| chr10 | E | 10q26.1 | 3 | 120000000 | 3184 | fs   | fs common |
| chr10 | E | 10q26.1 | 3 | 120000000 | 3626 | fs   | fs common |
| chr10 | E | 10q26.1 | 3 | 120000000 | 3914 | fs   | fs common |
| chr10 | E | 10q26.1 | 3 | 120000000 | 2591 | fs   | fs common |
| chr10 | E | 10q26.1 | 3 | 121000000 | 4127 | fs   | fs common |
| chr10 | E | 10q26.1 | 3 | 121000000 | 5009 | fs   | fs common |
| chr10 | E | 10q26.1 | 3 | 121000000 | 7804 | fs   | fs common |
| chr10 | E | 10q26.1 | 3 | 121000000 | 6021 | fs   | fs common |
| chr10 | E | 10q26.1 | 3 | 122000000 | 3910 | fs   | fs common |
| chr10 | E | 10q26.1 | 3 | 122000000 | 2183 | fs   | fs common |
| chr10 | E | 10q26.1 | 3 | 122000000 | 2776 | fs   | fs common |
| chr10 | E | 10q26.1 | 3 | 122000000 | 2953 | fs   | fs common |
| chr10 | E | 10q26.1 | 3 | 123000000 | 3157 | fs   | fs common |
| chr10 | E | 10q26.1 | 3 | 123000000 | 3160 | fs   | fs common |
| chr10 | E | 10q26.1 | 3 | 123000000 | 3174 | fs   | fs common |
| chr10 | E | 10q26.1 | 3 | 123000000 | 3303 | fs   | fs common |
| chr10 | E | 10q26.1 | 3 | 124000000 | 3074 | fs   | fs common |
| chr10 | E | 10q26.1 | 3 | 124000000 | 3956 | fs   | fs common |
| chr10 | E | 10q26.1 | 3 | 124000000 | 1973 | fs   | fs common |
| chr10 | E | 10q26.1 | 3 | 124000000 | 5361 | fs   | fs common |
| chr10 | E | 10q26.1 | 3 | 125000000 | 2651 | fs   | fs common |



|       |   |         |   |           |       |      |           |
|-------|---|---------|---|-----------|-------|------|-----------|
| chr10 | E | 10q26.1 | 3 | 125000000 | 2813  | fs   | fs common |
| chr10 | E | 10q26.1 | 3 | 125000000 | 3745  | fs   | fs common |
| chr10 | E | 10q26.1 | 3 | 125000000 | 3125  | fs   | fs common |
| chr10 | E | 10q26.1 | 3 | 126000000 | 5481  | fs   | fs common |
| chr10 | E | 10q26.1 | 3 | 126000000 | 4486  | fs   | fs common |
| chr10 | E | 10q26.1 | 3 | 126000000 | 5278  | fs   | fs common |
| chr10 | E | 10q26.1 | 3 | 126000000 | 3443  | fs   | fs common |
| chr10 | E | 10q26.1 | 3 | 127000000 | 2556  | fs   | fs common |
| chr10 | E | 10q26.1 | 3 | 127000000 | 2766  | fs   | fs common |
| chr10 | E | 10q26.1 | 3 | 127000000 | 2799  | fs   | fs common |
| chr10 | E | 10q26.1 | 3 | 127000000 | 1941  | fs   | fs common |
| chr10 | E | 10q26.2 | 1 | 128000000 | 2321  | nofs | nofs      |
| chr10 | E | 10q26.2 | 1 | 128000000 | 6255  | nofs | nofs      |
| chr10 | E | 10q26.2 | 1 | 128000000 | 3871  | nofs | nofs      |
| chr10 | E | 10q26.2 | 1 | 128000000 | 2249  | nofs | nofs      |
| chr10 | E | 10q26.2 | 1 | 129000000 | 4499  | nofs | nofs      |
| chr10 | E | 10q26.2 | 1 | 129000000 | 3082  | nofs | nofs      |
| chr10 | E | 10q26.2 | 1 | 129000000 | 5647  | nofs | nofs      |
| chr10 | E | 10q26.2 | 1 | 129000000 | 2690  | nofs | nofs      |
| chr10 | E | 10q26.2 | 1 | 130000000 | 3549  | nofs | nofs      |
| chr10 | E | 10q26.2 | 1 | 130000000 | 9212  | nofs | nofs      |
| chr10 | E | 10q26.2 | 1 | 130000000 | 4355  | nofs | nofs      |
| chr10 | E | 10q26.2 | 1 | 130000000 | 2740  | nofs | nofs      |
| chr10 | E | 10q26.2 | 1 | 131000000 | 5406  | nofs | nofs      |
| chr10 | B | 10q26.3 | . | 131000000 | 5552  | nofs | nofs      |
| chr10 | B | 10q26.3 | . | 131000000 | 4166  | nofs | nofs      |
| chr10 | B | 10q26.3 | . | 131000000 | 3455  | nofs | nofs      |
| chr10 | B | 10q26.3 | . | 132000000 | 5868  | nofs | nofs      |
| chr10 | B | 10q26.3 | . | 132000000 | 6697  | nofs | nofs      |
| chr10 | T | 10q26.3 | . | 132000000 | 8786  | nofs | nofs      |
| chr10 | T | 10q26.3 | . | 132000000 | 10953 | nofs | nofs      |
| chr10 | T | 10q26.3 | . | 133000000 | 11892 | nofs | nofs      |
| chr10 | T | 10q26.3 | . | 133000000 | 9507  | nofs | nofs      |
| chr10 | T | 10q26.3 | . | 133000000 | 10534 | nofs | nofs      |
| chr10 | T | 10q26.3 | . | 133000000 | 15867 | nofs | nofs      |
| chr10 | T | 10q26.3 | . | 134000000 | 16418 | nofs | nofs      |

|       |   |         |   |           |       |      |      |
|-------|---|---------|---|-----------|-------|------|------|
| chr10 | T | 10q26.3 | . | 134000000 | 22582 | nofs | nofs |
| chr10 | T | 10q26.3 | . | 134000000 | 26234 | nofs | nofs |
| chr10 | T | 10q26.3 | . | 134000000 | 34476 | nofs | nofs |
| chr10 | T | 10q26.3 | . | 135000000 | 30184 | nofs | nofs |
| chr10 | T | 10q26.3 | . | 135000000 | 36370 | nofs | nofs |
| chr10 | T | 10q26.3 | . | 135000000 | 21169 | nofs | nofs |
| chr11 | T | 11p15.5 | 8 | 125000    | 8898  | nofs | nofs |
| chr11 | T | 11p15.5 | 8 | 375000    | 31735 | nofs | nofs |
| chr11 | T | 11p15.5 | 8 | 625000    | 18201 | nofs | nofs |
| chr11 | T | 11p15.5 | 8 | 875000    | 13201 | nofs | nofs |
| chr11 | T | 11p15.5 | 8 | 1125000   | 22310 | nofs | nofs |
| chr11 | T | 11p15.5 | 8 | 1375000   | 26976 | nofs | nofs |
| chr11 | T | 11p15.5 | 8 | 1625000   | 17691 | nofs | nofs |
| chr11 | T | 11p15.5 | 8 | 1875000   | 17703 | nofs | nofs |
| chr11 | T | 11p15.5 | 8 | 2125000   | 12937 | nofs | nofs |
| chr11 | T | 11p15.5 | 8 | 2375000   | 9540  | nofs | nofs |
| chr11 | T | 11p15.4 | 8 | 2625000   | 4019  | nofs | nofs |
| chr11 | T | 11p15.4 | 8 | 2875000   | 5619  | nofs | nofs |
| chr11 | T | 11p15.4 | 8 | 3125000   | 8957  | nofs | nofs |
| chr11 | E | 11p15.4 | 8 | 3375000   | 8570  | nofs | nofs |
| chr11 | E | 11p15.4 | 8 | 3625000   | 4199  | nofs | nofs |
| chr11 | E | 11p15.4 | 8 | 3875000   | 2224  | nofs | nofs |
| chr11 | E | 11p15.4 | 8 | 4125000   | 2716  | nofs | nofs |
| chr11 | E | 11p15.4 | 8 | 4375000   | 2203  | nofs | nofs |
| chr11 | E | 11p15.4 | 8 | 4625000   | 1461  | nofs | nofs |
| chr11 | E | 11p15.4 | 8 | 4875000   | 2555  | nofs | nofs |
| chr11 | E | 11p15.4 | 8 | 5125000   | 2901  | nofs | nofs |
| chr11 | E | 11p15.4 | 8 | 5375000   | 2349  | nofs | nofs |
| chr11 | E | 11p15.4 | 8 | 5625000   | 2925  | nofs | nofs |
| chr11 | E | 11p15.4 | 8 | 5875000   | 2427  | nofs | nofs |
| chr11 | E | 11p15.4 | 8 | 6125000   | 2125  | nofs | nofs |
| chr11 | E | 11p15.4 | 8 | 6375000   | 2347  | nofs | nofs |
| chr11 | E | 11p15.4 | 8 | 6625000   | 1732  | nofs | nofs |
| chr11 | E | 11p15.4 | 8 | 6875000   | 1946  | nofs | nofs |
| chr11 | E | 11p15.4 | 8 | 7125000   | 1951  | nofs | nofs |
| chr11 | E | 11p15.4 | 8 | 7375000   | 1945  | nofs | nofs |

|       |   |         |   |          |      |      |                    |
|-------|---|---------|---|----------|------|------|--------------------|
| chr11 | E | 11p15.4 | 8 | 7625000  | 2296 | nofs | nofs               |
| chr11 | E | 11p15.4 | 8 | 7875000  | 1715 | nofs | nofs               |
| chr11 | E | 11p15.4 | 8 | 8125000  | 2782 | nofs | nofs               |
| chr11 | E | 11p15.4 | 8 | 8375000  | 1389 | nofs | nofs               |
| chr11 | E | 11p15.4 | 8 | 8625000  | 3327 | nofs | nofs               |
| chr11 | E | 11p15.4 | 8 | 8875000  | 4853 | nofs | nofs               |
| chr11 | E | 11p15.4 | 8 | 9125000  | 3070 | nofs | nofs               |
| chr11 | E | 11p15.4 | 8 | 9375000  | 8471 | nofs | nofs               |
| chr11 | E | 11p15.4 | 8 | 9625000  | 5743 | nofs | nofs               |
| chr11 | E | 11p15.4 | 8 | 9875000  | 3254 | nofs | nofs               |
| chr11 | E | 11p15.4 | 8 | 10125000 | 2515 | nofs | nofs               |
| chr11 | E | 11p15.4 | 8 | 10375000 | 2370 | nofs | nofs               |
| chr11 | E | 11p15.4 | 8 | 10625000 | 2915 | nofs | nofs               |
| chr11 | B | 11p15.3 | . | 10875000 | 3236 | nofs | nofs               |
| chr11 | B | 11p15.3 | . | 11125000 | 2250 | nofs | nofs               |
| chr11 | B | 11p15.3 | . | 11375000 | 1293 | nofs | nofs               |
| chr11 | B | 11p15.3 | . | 11625000 | 2668 | nofs | nofs               |
| chr11 | B | 11p15.3 | . | 11875000 | 2775 | nofs | nofs               |
| chr11 | B | 11p15.3 | . | 12125000 | 1644 | nofs | nofs               |
| chr11 | B | 11p15.3 | . | 12375000 | 1606 | nofs | nofs               |
| chr11 | B | 11p15.3 | . | 12625000 | 1810 | nofs | nofs               |
| chr11 | E | 11p15.2 | 1 | 12875000 | 1605 | nofs | nofs               |
| chr11 | E | 11p15.2 | 1 | 13125000 | 1901 | nofs | nofs               |
| chr11 | E | 11p15.2 | 1 | 13375000 | 2530 | nofs | nofs               |
| chr11 | E | 11p15.2 | 1 | 13625000 | 1566 | nofs | nofs               |
| chr11 | E | 11p15.2 | 1 | 13875000 | 1197 | nofs | nofs               |
| chr11 | E | 11p15.2 | 1 | 14125000 | 3053 | nofs | nofs               |
| chr11 | E | 11p15.2 | 1 | 14375000 | 2399 | nofs | nofs               |
| chr11 | E | 11p15.2 | 1 | 14625000 | 3504 | nofs | nofs               |
| chr11 | E | 11p15.2 | 1 | 14875000 | 5042 | nofs | nofs               |
| chr11 | E | 11p15.2 | 1 | 15125000 | 2884 | nofs | nofs               |
| chr11 | E | 11p15.2 | 1 | 15375000 | 2415 | nofs | nofs               |
| chr11 | E | 11p15.2 | 1 | 15625000 | 1913 | nofs | nofs               |
| chr11 | E | 11p15.2 | 1 | 15875000 | 2534 | nofs | nofs               |
| chr11 | E | 11p15.2 | 1 | 16125000 | 2457 | nofs | nofs               |
| chr11 | E | 11p15.1 | 4 | 16375000 | 1602 | fs   | fs common and rare |

|       |   |         |   |          |       |      |                    |
|-------|---|---------|---|----------|-------|------|--------------------|
| chr11 | E | 11p15.1 | 4 | 16625000 | 1738  | fs   | fs common and rare |
| chr11 | E | 11p15.1 | 4 | 16875000 | 3913  | fs   | fs common and rare |
| chr11 | E | 11p15.1 | 4 | 17125000 | 10418 | fs   | fs common and rare |
| chr11 | E | 11p15.1 | 4 | 17375000 | 3284  | fs   | fs common and rare |
| chr11 | E | 11p15.1 | 4 | 17625000 | 3815  | fs   | fs common and rare |
| chr11 | E | 11p15.1 | 4 | 17875000 | 1906  | fs   | fs common and rare |
| chr11 | E | 11p15.1 | 4 | 18125000 | 4591  | fs   | fs common and rare |
| chr11 | E | 11p15.1 | 4 | 18375000 | 3536  | fs   | fs common and rare |
| chr11 | E | 11p15.1 | 4 | 18625000 | 4428  | fs   | fs common and rare |
| chr11 | E | 11p15.1 | 4 | 18875000 | 1560  | fs   | fs common and rare |
| chr11 | E | 11p15.1 | 4 | 19125000 | 1456  | fs   | fs common and rare |
| chr11 | E | 11p15.1 | 4 | 19375000 | 1385  | fs   | fs common and rare |
| chr11 | E | 11p15.1 | 4 | 19625000 | 1620  | fs   | fs common and rare |
| chr11 | E | 11p15.1 | 4 | 19875000 | 3365  | fs   | fs common and rare |
| chr11 | E | 11p15.1 | 4 | 20125000 | 1839  | fs   | fs common and rare |
| chr11 | E | 11p15.1 | 4 | 20375000 | 2598  | fs   | fs common and rare |
| chr11 | E | 11p15.1 | 4 | 20625000 | 4013  | fs   | fs common and rare |
| chr11 | E | 11p15.1 | 4 | 20875000 | 2962  | fs   | fs common and rare |
| chr11 | E | 11p15.1 | 4 | 21125000 | 1668  | fs   | fs common and rare |
| chr11 | E | 11p15.1 | 4 | 21375000 | 2747  | fs   | fs common and rare |
| chr11 | E | 11p15.1 | 4 | 21625000 | 2079  | fs   | fs common and rare |
| chr11 | E | 11p14   | 4 | 21875000 | 2142  | nofs | nofs               |
| chr11 | E | 11p14   | 4 | 22125000 | 2359  | nofs | nofs               |
| chr11 | E | 11p14   | 4 | 22375000 | 3423  | nofs | nofs               |
| chr11 | E | 11p14   | 4 | 22625000 | 2912  | nofs | nofs               |
| chr11 | E | 11p14   | 4 | 22875000 | 2965  | nofs | nofs               |
| chr11 | E | 11p14   | 4 | 23125000 | 2196  | nofs | nofs               |
| chr11 | E | 11p14   | 4 | 23375000 | 2335  | nofs | nofs               |
| chr11 | E | 11p14   | 4 | 23625000 | 2926  | nofs | nofs               |
| chr11 | E | 11p14   | 4 | 23875000 | 4079  | nofs | nofs               |
| chr11 | E | 11p14   | 4 | 24125000 | 2240  | nofs | nofs               |
| chr11 | E | 11p14   | 4 | 24375000 | 2377  | nofs | nofs               |
| chr11 | E | 11p14   | 4 | 24625000 | 3767  | nofs | nofs               |
| chr11 | E | 11p14   | 4 | 24875000 | 5163  | nofs | nofs               |
| chr11 | E | 11p14   | 4 | 25125000 | 4116  | nofs | nofs               |
| chr11 | E | 11p14   | 4 | 25375000 | 2161  | nofs | nofs               |

|       |   |       |   |          |      |      |           |
|-------|---|-------|---|----------|------|------|-----------|
| chr11 | E | 11p14 | 4 | 25625000 | 4141 | nofs | nofs      |
| chr11 | E | 11p14 | 4 | 25875000 | 3298 | nofs | nofs      |
| chr11 | E | 11p14 | 4 | 26125000 | 3020 | fs   | fs common |
| chr11 | E | 11p14 | 4 | 26375000 | 2737 | fs   | fs common |
| chr11 | E | 11p14 | 4 | 26625000 | 2981 | fs   | fs common |
| chr11 | E | 11p14 | 4 | 26875000 | 2316 | fs   | fs common |
| chr11 | E | 11p14 | 4 | 27125000 | 2334 | fs   | fs common |
| chr11 | E | 11p14 | 4 | 27375000 | 1927 | fs   | fs common |
| chr11 | E | 11p14 | 4 | 27625000 | 2093 | nofs | nofs      |
| chr11 | E | 11p14 | 4 | 27875000 | 2147 | nofs | nofs      |
| chr11 | E | 11p14 | 4 | 28125000 | 1361 | nofs | nofs      |
| chr11 | E | 11p14 | 4 | 28375000 | 3049 | nofs | nofs      |
| chr11 | E | 11p14 | 4 | 28625000 | 1883 | nofs | nofs      |
| chr11 | E | 11p14 | 4 | 28875000 | 2986 | nofs | nofs      |
| chr11 | E | 11p14 | 4 | 29125000 | 2353 | nofs | nofs      |
| chr11 | E | 11p14 | 4 | 29375000 | 3100 | nofs | nofs      |
| chr11 | E | 11p14 | 4 | 29625000 | 3020 | nofs | nofs      |
| chr11 | E | 11p14 | 4 | 29875000 | 2008 | nofs | nofs      |
| chr11 | E | 11p14 | 4 | 30125000 | 2343 | nofs | nofs      |
| chr11 | E | 11p14 | 4 | 30375000 | 1645 | nofs | nofs      |
| chr11 | E | 11p14 | 4 | 30625000 | 1999 | nofs | nofs      |
| chr11 | E | 11p14 | 4 | 30875000 | 3246 | nofs | nofs      |
| chr11 | E | 11p13 | 2 | 31125000 | 1368 | fs   | fs common |
| chr11 | E | 11p13 | 2 | 31375000 | 2131 | fs   | fs common |
| chr11 | E | 11p13 | 2 | 31625000 | 1708 | fs   | fs common |
| chr11 | E | 11p13 | 2 | 31875000 | 2624 | fs   | fs common |
| chr11 | E | 11p13 | 2 | 32125000 | 2462 | fs   | fs common |
| chr11 | E | 11p13 | 2 | 32375000 | 3261 | fs   | fs common |
| chr11 | E | 11p13 | 2 | 32625000 | 4302 | fs   | fs common |
| chr11 | E | 11p13 | 2 | 32875000 | 3033 | fs   | fs common |
| chr11 | E | 11p13 | 2 | 33125000 | 3614 | fs   | fs common |
| chr11 | E | 11p13 | 2 | 33375000 | 4157 | fs   | fs common |
| chr11 | E | 11p13 | 2 | 33625000 | 1629 | fs   | fs common |
| chr11 | E | 11p13 | 2 | 33875000 | 3682 | fs   | fs common |
| chr11 | E | 11p13 | 2 | 34125000 | 4191 | fs   | fs common |
| chr11 | E | 11p13 | 2 | 34375000 | 3567 | fs   | fs common |

|       |   |       |   |          |       |      |           |
|-------|---|-------|---|----------|-------|------|-----------|
| chr11 | E | 11p13 | 2 | 34625000 | 1762  | fs   | fs common |
| chr11 | E | 11p13 | 2 | 34875000 | 2237  | fs   | fs common |
| chr11 | E | 11p13 | 2 | 35125000 | 2641  | fs   | fs common |
| chr11 | E | 11p13 | 2 | 35375000 | 1829  | fs   | fs common |
| chr11 | E | 11p13 | 2 | 35625000 | 2042  | fs   | fs common |
| chr11 | E | 11p13 | 2 | 35875000 | 1492  | fs   | fs common |
| chr11 | E | 11p13 | 2 | 36125000 | 3701  | fs   | fs common |
| chr11 | E | 11p13 | 2 | 36375000 | 4473  | fs   | fs common |
| chr11 | B | 11p12 | . | 36625000 | 1701  | nofs | nofs      |
| chr11 | B | 11p12 | . | 36875000 | 1766  | nofs | nofs      |
| chr11 | B | 11p12 | . | 37125000 | 1994  | nofs | nofs      |
| chr11 | B | 11p12 | . | 37375000 | 4829  | nofs | nofs      |
| chr11 | B | 11p12 | . | 37625000 | 4861  | nofs | nofs      |
| chr11 | B | 11p12 | . | 37875000 | 2452  | nofs | nofs      |
| chr11 | B | 11p12 | . | 38125000 | 2995  | nofs | nofs      |
| chr11 | B | 11p12 | . | 38375000 | 2225  | nofs | nofs      |
| chr11 | B | 11p12 | . | 38625000 | 2232  | nofs | nofs      |
| chr11 | B | 11p12 | . | 38875000 | 2482  | nofs | nofs      |
| chr11 | B | 11p12 | . | 39125000 | 3732  | nofs | nofs      |
| chr11 | B | 11p12 | . | 39375000 | 3124  | nofs | nofs      |
| chr11 | B | 11p12 | . | 39625000 | 4465  | nofs | nofs      |
| chr11 | B | 11p12 | . | 39875000 | 1400  | nofs | nofs      |
| chr11 | B | 11p12 | . | 40125000 | 1431  | nofs | nofs      |
| chr11 | B | 11p12 | . | 40375000 | 1953  | nofs | nofs      |
| chr11 | B | 11p12 | . | 40625000 | 1672  | nofs | nofs      |
| chr11 | B | 11p12 | . | 40875000 | 2866  | nofs | nofs      |
| chr11 | B | 11p12 | . | 41125000 | 1444  | nofs | nofs      |
| chr11 | B | 11p12 | . | 41375000 | 4275  | nofs | nofs      |
| chr11 | B | 11p12 | . | 41625000 | 5110  | nofs | nofs      |
| chr11 | B | 11p12 | . | 41875000 | 3090  | nofs | nofs      |
| chr11 | B | 11p12 | . | 42125000 | 2371  | nofs | nofs      |
| chr11 | B | 11p12 | . | 42375000 | 2100  | nofs | nofs      |
| chr11 | B | 11p12 | . | 42625000 | 2022  | nofs | nofs      |
| chr11 | B | 11p12 | . | 42875000 | 4386  | nofs | nofs      |
| chr11 | B | 11p12 | . | 43125000 | 12303 | nofs | nofs      |
| chr11 | B | 11p12 | . | 43375000 | 3380  | nofs | nofs      |

|       |   |          |   |          |        |      |      |
|-------|---|----------|---|----------|--------|------|------|
| chr11 | E | 11p11.2  | 1 | 43625000 | 2043   | nofs | nofs |
| chr11 | E | 11p11.2  | 1 | 43875000 | 2461   | nofs | nofs |
| chr11 | E | 11p11.2  | 1 | 44125000 | 2004   | nofs | nofs |
| chr11 | E | 11p11.2  | 1 | 44375000 | 3206   | nofs | nofs |
| chr11 | E | 11p11.2  | 1 | 44625000 | 3405   | nofs | nofs |
| chr11 | E | 11p11.2  | 1 | 44875000 | 3184   | nofs | nofs |
| chr11 | E | 11p11.2  | 1 | 45125000 | 3244   | nofs | nofs |
| chr11 | E | 11p11.2  | 1 | 45375000 | 2539   | nofs | nofs |
| chr11 | E | 11p11.2  | 1 | 45625000 | 3426   | nofs | nofs |
| chr11 | E | 11p11.2  | 1 | 45875000 | 2316   | nofs | nofs |
| chr11 | E | 11p11.2  | 1 | 46125000 | 2415   | nofs | nofs |
| chr11 | E | 11p11.2  | 1 | 46375000 | 3288   | nofs | nofs |
| chr11 | E | 11p11.2  | 1 | 46625000 | 3080   | nofs | nofs |
| chr11 | E | 11p11.2  | 1 | 46875000 | 2897   | nofs | nofs |
| chr11 | E | 11p11.2  | 1 | 47125000 | 4689   | nofs | nofs |
| chr11 | E | 11p11.2  | 1 | 47375000 | 3439   | nofs | nofs |
| chr11 | E | 11p11.2  | 1 | 47625000 | 6935   | nofs | nofs |
| chr11 | E | 11p11.2  | 1 | 47875000 | 4572   | nofs | nofs |
| chr11 | E | 11p11.2  | 1 | 48125000 | 3843   | nofs | nofs |
| chr11 | E | 11p11.2  | 1 | 48375000 | 1323   | nofs | nofs |
| chr11 | C | 11p11.2  | 1 | 48625000 | 81404  | nofs | nofs |
| chr11 | C | 11p11.12 | 1 | 48875000 | 127407 | nofs | nofs |
| chr11 | C | 11p11.12 | 1 | 49125000 | 2749   | nofs | nofs |
| chr11 | C | 11p11.12 | 1 | 49375000 | 2642   | nofs | nofs |
| chr11 | C | 11p11.12 | 1 | 49625000 | 2389   | nofs | nofs |
| chr11 | C | 11p11.12 | 1 | 49875000 | 5892   | nofs | nofs |
| chr11 | C | 11p11.12 | 1 | 50125000 | 11229  | nofs | nofs |
| chr11 | C | 11p11.12 | 1 | 50375000 | 148952 | nofs | nofs |
| chr11 | C | 11p11.12 | 1 | 50625000 | 192312 | nofs | nofs |
| chr11 | C | 11p11.12 | 1 | 50875000 | 41109  | nofs | nofs |
| chr11 | C | 11p11.12 | 1 | 51125000 | 166893 | nofs | nofs |
| chr11 | C | 11p11.12 | 1 | 51375000 | 27739  | nofs | nofs |
| chr11 | C |          | . | 51625000 | 0      | nofs | nofs |
| chr11 | C |          | . | 51875000 | 0      | nofs | nofs |
| chr11 | C |          | . | 52125000 | 0      | nofs | nofs |
| chr11 | C |          | . | 52375000 | 0      | nofs | nofs |

|       |   |   |          |        |      |      |
|-------|---|---|----------|--------|------|------|
| chr11 | C | . | 52625000 | 0      | nofs | nofs |
| chr11 | C | . | 52875000 | 0      | nofs | nofs |
| chr11 | C | . | 53125000 | 0      | nofs | nofs |
| chr11 | C | . | 53375000 | 0      | nofs | nofs |
| chr11 | C | . | 53625000 | 0      | nofs | nofs |
| chr11 | C | . | 53875000 | 0      | nofs | nofs |
| chr11 | C | . | 54125000 | 0      | nofs | nofs |
| chr11 | C | . | 54375000 | 37996  | nofs | nofs |
| chr11 | C | . | 54625000 | 197463 | nofs | nofs |
| chr11 | C | . | 54875000 | 32427  | nofs | nofs |
| chr11 | C | . | 55125000 | 2175   | nofs | nofs |
| chr11 | C | . | 55375000 | 2829   | nofs | nofs |
| chr11 | C | . | 55625000 | 4258   | nofs | nofs |
| chr11 | C | . | 55875000 | 3066   | nofs | nofs |
| chr11 | C | . | 56125000 | 3324   | nofs | nofs |
| chr11 | C | . | 56375000 | 2746   | nofs | nofs |
| chr11 | C | . | 56625000 | 3096   | nofs | nofs |
| chr11 | C | . | 56875000 | 2746   | nofs | nofs |
| chr11 | C | 4 | 57125000 | 4872   | nofs | nofs |
| chr11 | C | 4 | 57375000 | 2518   | nofs | nofs |
| chr11 | E | 4 | 57625000 | 2436   | nofs | nofs |
| chr11 | E | 4 | 57875000 | 2140   | nofs | nofs |
| chr11 | E | 4 | 58125000 | 8855   | nofs | nofs |
| chr11 | E | 4 | 58375000 | 1462   | nofs | nofs |
| chr11 | E | 4 | 58625000 | 1592   | nofs | nofs |
| chr11 | E | 4 | 58875000 | 1926   | nofs | nofs |
| chr11 | E | 4 | 59125000 | 4463   | nofs | nofs |
| chr11 | E | 4 | 59375000 | 2386   | nofs | nofs |
| chr11 | E | 4 | 59625000 | 3938   | nofs | nofs |
| chr11 | E | 4 | 59875000 | 3275   | nofs | nofs |
| chr11 | E | 4 | 60125000 | 6380   | nofs | nofs |
| chr11 | E | 4 | 60375000 | 3793   | nofs | nofs |
| chr11 | E | 4 | 60625000 | 7298   | nofs | nofs |
| chr11 | E | 4 | 60875000 | 3406   | nofs | nofs |
| chr11 | E | 4 | 61125000 | 4603   | nofs | nofs |
| chr11 | E | 4 | 61375000 | 3526   | nofs | nofs |



|       |   |         |   |          |       |      |      |                    |
|-------|---|---------|---|----------|-------|------|------|--------------------|
| chr11 | E | 11q12   | 4 | 61625000 | 3766  | nofs | nofs | fs common and rare |
| chr11 | E | 11q12   | 4 | 61875000 | 5741  | nofs | nofs | fs common and rare |
| chr11 | E | 11q12   | 4 | 62125000 | 13287 | nofs | nofs | fs common and rare |
| chr11 | E | 11q12   | 4 | 62375000 | 5637  | nofs | nofs | fs common and rare |
| chr11 | E | 11q12   | 4 | 62625000 | 2721  | nofs | nofs | fs common and rare |
| chr11 | E | 11q12   | 4 | 62875000 | 2342  | nofs | nofs | fs common and rare |
| chr11 | E | 11q13.1 | 1 | 63125000 | 3149  | fs   | fs   | fs common and rare |
| chr11 | E | 11q13.1 | 1 | 63375000 | 5642  | fs   | fs   | fs common and rare |
| chr11 | E | 11q13.1 | 1 | 63625000 | 7896  | fs   | fs   | fs common and rare |
| chr11 | E | 11q13.1 | 1 | 63875000 | 6969  | fs   | fs   | fs common and rare |
| chr11 | E | 11q13.1 | 1 | 64125000 | 8063  | fs   | fs   | fs common and rare |
| chr11 | E | 11q13.1 | 1 | 64375000 | 4049  | fs   | fs   | fs common and rare |
| chr11 | E | 11q13.1 | 1 | 64625000 | 3242  | fs   | fs   | fs common and rare |
| chr11 | E | 11q13.1 | 1 | 64875000 | 8779  | fs   | fs   | fs common and rare |
| chr11 | E | 11q13.1 | 1 | 65125000 | 3993  | fs   | fs   | fs common and rare |
| chr11 | E | 11q13.1 | 1 | 65375000 | 6054  | fs   | fs   | fs common and rare |
| chr11 | E | 11q13.1 | 1 | 65625000 | 2987  | fs   | fs   | fs common and rare |
| chr11 | E | 11q13.2 | 1 | 65875000 | 5019  | fs   | fs   | fs common and rare |
| chr11 | B | 11q13.2 | . | 66125000 | 4364  | fs   | fs   | fs common and rare |
| chr11 | B | 11q13.2 | . | 66375000 | 2777  | fs   | fs   | fs common and rare |
| chr11 | B | 11q13.2 | . | 66625000 | 5890  | fs   | fs   | fs common and rare |
| chr11 | B | 11q13.2 | . | 66875000 | 2867  | fs   | fs   | fs common and rare |
| chr11 | B | 11q13.2 | . | 67125000 | 6515  | fs   | fs   | fs common and rare |
| chr11 | B | 11q13.2 | . | 67375000 | 4564  | fs   | fs   | fs common and rare |
| chr11 | B | 11q13.2 | . | 67625000 | 4040  | fs   | fs   | fs common and rare |
| chr11 | B | 11q13.2 | . | 67875000 | 7575  | fs   | fs   | fs common and rare |
| chr11 | B | 11q13.2 | . | 68125000 | 5089  | fs   | fs   | fs common and rare |
| chr11 | E | 11q13.3 | 5 | 68375000 | 7643  | fs   | fs   | fs common and rare |
| chr11 | E | 11q13.3 | 5 | 68625000 | 10933 | fs   | fs   | fs common and rare |
| chr11 | E | 11q13.3 | 5 | 68875000 | 9012  | fs   | fs   | fs common and rare |
| chr11 | E | 11q13.3 | 5 | 69125000 | 6590  | fs   | fs   | fs common and rare |
| chr11 | E | 11q13.3 | 5 | 69375000 | 9256  | fs   | fs   | fs common and rare |
| chr11 | E | 11q13.3 | 5 | 69625000 | 12168 | fs   | fs   | fs common and rare |
| chr11 | E | 11q13.3 | 5 | 69875000 | 5804  | fs   | fs   | fs common and rare |
| chr11 | E | 11q13.3 | 5 | 70125000 | 4703  | fs   | fs   | fs common and rare |
| chr11 | E | 11q13.4 | 7 | 70375000 | 11162 | fs   | fs   | fs common and rare |

|       |   |         |   |          |       |      |                    |
|-------|---|---------|---|----------|-------|------|--------------------|
| chr11 | E | 11q13.4 | 7 | 70625000 | 7326  | fs   | fs common and rare |
| chr11 | E | 11q13.4 | 7 | 70875000 | 16613 | fs   | fs common and rare |
| chr11 | E | 11q13.4 | 7 | 71125000 | 6440  | fs   | fs common and rare |
| chr11 | E | 11q13.4 | 7 | 71375000 | 4311  | fs   | fs common and rare |
| chr11 | E | 11q13.4 | 7 | 71625000 | 4322  | fs   | fs common and rare |
| chr11 | E | 11q13.4 | 7 | 71875000 | 5325  | fs   | fs common and rare |
| chr11 | E | 11q13.4 | 7 | 72125000 | 2681  | fs   | fs common and rare |
| chr11 | E | 11q13.4 | 7 | 72375000 | 2992  | fs   | fs common and rare |
| chr11 | E | 11q13.4 | 7 | 72625000 | 3450  | fs   | fs common and rare |
| chr11 | E | 11q13.4 | 7 | 72875000 | 3155  | fs   | fs common and rare |
| chr11 | E | 11q13.4 | 7 | 73125000 | 4289  | fs   | fs common and rare |
| chr11 | E | 11q13.4 | 7 | 73375000 | 5753  | fs   | fs common and rare |
| chr11 | E | 11q13.4 | 7 | 73625000 | 3495  | fs   | fs common and rare |
| chr11 | E | 11q13.4 | 7 | 73875000 | 3063  | fs   | fs common and rare |
| chr11 | E | 11q13.4 | 7 | 74125000 | 1134  | fs   | fs common and rare |
| chr11 | E | 11q13.4 | 7 | 74375000 | 2271  | fs   | fs common and rare |
| chr11 | E | 11q13.4 | 7 | 74625000 | 2984  | fs   | fs common and rare |
| chr11 | E | 11q13.4 | 7 | 74875000 | 2641  | fs   | fs common and rare |
| chr11 | E | 11q13.5 | 2 | 75125000 | 1392  | fs   | fs common and rare |
| chr11 | E | 11q13.5 | 2 | 75375000 | 3319  | fs   | fs common and rare |
| chr11 | E | 11q13.5 | 2 | 75625000 | 3593  | fs   | fs common and rare |
| chr11 | E | 11q13.5 | 2 | 75875000 | 3277  | fs   | fs common and rare |
| chr11 | E | 11q13.5 | 2 | 76125000 | 4972  | fs   | fs common and rare |
| chr11 | E | 11q13.5 | 2 | 76375000 | 4710  | fs   | fs common and rare |
| chr11 | E | 11q13.5 | 2 | 76625000 | 2660  | fs   | fs common and rare |
| chr11 | E | 11q13.5 | 2 | 76875000 | 3638  | fs   | fs common and rare |
| chr11 | E | 11q13.5 | 2 | 77125000 | 2248  | fs   | fs common and rare |
| chr11 | E | 11q13.5 | 2 | 77375000 | 3603  | fs   | fs common and rare |
| chr11 | E | 11q14.1 | 1 | 77625000 | 2834  | nofs | nofs               |
| chr11 | E | 11q14.1 | 1 | 77875000 | 1885  | nofs | nofs               |
| chr11 | E | 11q14.1 | 1 | 78125000 | 1617  | nofs | nofs               |
| chr11 | E | 11q14.1 | 1 | 78375000 | 2302  | nofs | nofs               |
| chr11 | E | 11q14.1 | 1 | 78625000 | 5152  | nofs | nofs               |
| chr11 | E | 11q14.1 | 1 | 78875000 | 2430  | nofs | nofs               |
| chr11 | E | 11q14.1 | 1 | 79125000 | 3331  | nofs | nofs               |
| chr11 | E | 11q14.1 | 1 | 79375000 | 1689  | nofs | nofs               |

|       |   |         |   |          |      |      |           |
|-------|---|---------|---|----------|------|------|-----------|
| chr11 | E | 11q14.1 | 1 | 79625000 | 2284 | nofs | nofs      |
| chr11 | E | 11q14.1 | 1 | 79875000 | 2862 | nofs | nofs      |
| chr11 | E | 11q14.1 | 1 | 80125000 | 2071 | nofs | nofs      |
| chr11 | E | 11q14.1 | 1 | 80375000 | 3040 | nofs | nofs      |
| chr11 | E | 11q14.1 | 1 | 80625000 | 2625 | nofs | nofs      |
| chr11 | E | 11q14.1 | 1 | 80875000 | 3958 | nofs | nofs      |
| chr11 | E | 11q14.1 | 1 | 81125000 | 2059 | nofs | nofs      |
| chr11 | E | 11q14.1 | 1 | 81375000 | 3567 | nofs | nofs      |
| chr11 | E | 11q14.1 | 1 | 81625000 | 2619 | nofs | nofs      |
| chr11 | E | 11q14.1 | 1 | 81875000 | 2479 | nofs | nofs      |
| chr11 | E | 11q14.1 | 1 | 82125000 | 3039 | nofs | nofs      |
| chr11 | E | 11q14.1 | 1 | 82375000 | 2044 | nofs | nofs      |
| chr11 | E | 11q14.1 | 1 | 82625000 | 3795 | nofs | nofs      |
| chr11 | E | 11q14.1 | 1 | 82875000 | 3325 | nofs | nofs      |
| chr11 | E | 11q14.1 | 1 | 83125000 | 2771 | nofs | nofs      |
| chr11 | E | 11q14.1 | 1 | 83375000 | 2050 | nofs | nofs      |
| chr11 | E | 11q14.1 | 1 | 83625000 | 2306 | nofs | nofs      |
| chr11 | E | 11q14.1 | 1 | 83875000 | 1879 | nofs | nofs      |
| chr11 | E | 11q14.1 | 1 | 84125000 | 2516 | nofs | nofs      |
| chr11 | E | 11q14.1 | 1 | 84375000 | 1691 | nofs | nofs      |
| chr11 | E | 11q14.1 | 1 | 84625000 | 1538 | nofs | nofs      |
| chr11 | E | 11q14.1 | 1 | 84875000 | 2571 | nofs | nofs      |
| chr11 | E | 11q14.1 | 1 | 85125000 | 2474 | nofs | nofs      |
| chr11 | E | 11q14.1 | 1 | 85375000 | 2879 | nofs | nofs      |
| chr11 | B | 11q14.2 | . | 85625000 | 4625 | fs   | fs common |
| chr11 | B | 11q14.2 | . | 85875000 | 1476 | fs   | fs common |
| chr11 | B | 11q14.2 | . | 86125000 | 7921 | fs   | fs common |
| chr11 | B | 11q14.2 | . | 86375000 | 4696 | fs   | fs common |
| chr11 | B | 11q14.2 | . | 86625000 | 2699 | fs   | fs common |
| chr11 | B | 11q14.2 | . | 86875000 | 2065 | fs   | fs common |
| chr11 | B | 11q14.2 | . | 87125000 | 2683 | fs   | fs common |
| chr11 | B | 11q14.2 | . | 87375000 | 4495 | fs   | fs common |
| chr11 | B | 11q14.2 | . | 87625000 | 3526 | fs   | fs common |
| chr11 | B | 11q14.2 | . | 87875000 | 2016 | fs   | fs common |
| chr11 | E | 11q14.3 | 2 | 88125000 | 2139 | nofs | nofs      |
| chr11 | E | 11q14.3 | 2 | 88375000 | 2028 | nofs | nofs      |

|       |   |         |   |          |       |      |      |
|-------|---|---------|---|----------|-------|------|------|
| chr11 | E | 11q14.3 | 2 | 88625000 | 2889  | nofs | nofs |
| chr11 | E | 11q14.3 | 2 | 88875000 | 3530  | nofs | nofs |
| chr11 | E | 11q14.3 | 2 | 89125000 | 3339  | nofs | nofs |
| chr11 | E | 11q14.3 | 2 | 89375000 | 11099 | nofs | nofs |
| chr11 | E | 11q14.3 | 2 | 89625000 | 3159  | nofs | nofs |
| chr11 | E | 11q14.3 | 2 | 89875000 | 2031  | nofs | nofs |
| chr11 | E | 11q14.3 | 2 | 90125000 | 1849  | nofs | nofs |
| chr11 | E | 11q14.3 | 2 | 90375000 | 2749  | nofs | nofs |
| chr11 | E | 11q14.3 | 2 | 90625000 | 3176  | nofs | nofs |
| chr11 | E | 11q14.3 | 2 | 90875000 | 3178  | nofs | nofs |
| chr11 | E | 11q14.3 | 2 | 91125000 | 1176  | nofs | nofs |
| chr11 | E | 11q14.3 | 2 | 91375000 | 1544  | nofs | nofs |
| chr11 | E | 11q14.3 | 2 | 91625000 | 3192  | nofs | nofs |
| chr11 | E | 11q14.3 | 2 | 91875000 | 2311  | nofs | nofs |
| chr11 | E | 11q14.3 | 2 | 92125000 | 1509  | nofs | nofs |
| chr11 | E | 11q14.3 | 2 | 92375000 | 4459  | nofs | nofs |
| chr11 | B | 11q21   | . | 92625000 | 1927  | nofs | nofs |
| chr11 | B | 11q21   | . | 92875000 | 3111  | nofs | nofs |
| chr11 | B | 11q21   | . | 93125000 | 1786  | nofs | nofs |
| chr11 | B | 11q21   | . | 93375000 | 3582  | nofs | nofs |
| chr11 | B | 11q21   | . | 93625000 | 2799  | nofs | nofs |
| chr11 | B | 11q21   | . | 93875000 | 1342  | nofs | nofs |
| chr11 | B | 11q21   | . | 94125000 | 1222  | nofs | nofs |
| chr11 | B | 11q21   | . | 94375000 | 2393  | nofs | nofs |
| chr11 | B | 11q21   | . | 94625000 | 3488  | nofs | nofs |
| chr11 | B | 11q21   | . | 94875000 | 2446  | nofs | nofs |
| chr11 | B | 11q21   | . | 95125000 | 1512  | nofs | nofs |
| chr11 | B | 11q21   | . | 95375000 | 3491  | nofs | nofs |
| chr11 | B | 11q21   | . | 95625000 | 1523  | nofs | nofs |
| chr11 | B | 11q21   | . | 95875000 | 2202  | nofs | nofs |
| chr11 | B | 11q21   | . | 96125000 | 1849  | nofs | nofs |
| chr11 | B | 11q21   | . | 96375000 | 2243  | nofs | nofs |
| chr11 | E | 11q22.1 | 2 | 96625000 | 1904  | nofs | nofs |
| chr11 | E | 11q22.1 | 2 | 96875000 | 2837  | nofs | nofs |
| chr11 | E | 11q22.1 | 2 | 97125000 | 3556  | nofs | nofs |
| chr11 | E | 11q22.1 | 2 | 97375000 | 2831  | nofs | nofs |

|       |   |         |   |          |      |      |      |
|-------|---|---------|---|----------|------|------|------|
| chr11 | E | 11q22.1 | 2 | 97625000 | 2510 | nofs | nofs |
| chr11 | E | 11q22.1 | 2 | 97875000 | 3734 | nofs | nofs |
| chr11 | E | 11q22.1 | 2 | 98125000 | 3874 | nofs | nofs |
| chr11 | E | 11q22.1 | 2 | 98375000 | 1938 | nofs | nofs |
| chr11 | E | 11q22.1 | 2 | 98625000 | 2615 | nofs | nofs |
| chr11 | E | 11q22.1 | 2 | 98875000 | 2278 | nofs | nofs |
| chr11 | E | 11q22.1 | 2 | 99125000 | 2289 | nofs | nofs |
| chr11 | E | 11q22.1 | 2 | 99375000 | 1716 | nofs | nofs |
| chr11 | E | 11q22.1 | 2 | 99625000 | 1457 | nofs | nofs |
| chr11 | E | 11q22.1 | 2 | 99875000 | 1502 | nofs | nofs |
| chr11 | E | 11q22.1 | 2 | 10000000 | 3335 | nofs | nofs |
| chr11 | E | 11q22.1 | 2 | 10000000 | 1811 | nofs | nofs |
| chr11 | E | 11q22.1 | 2 | 10100000 | 3913 | nofs | nofs |
| chr11 | E | 11q22.1 | 2 | 10100000 | 2513 | nofs | nofs |
| chr11 | E | 11q22.1 | 2 | 10100000 | 1753 | nofs | nofs |
| chr11 | E | 11q22.2 | 1 | 10100000 | 2535 | nofs | nofs |
| chr11 | E | 11q22.2 | 1 | 10200000 | 1874 | nofs | nofs |
| chr11 | E | 11q22.2 | 1 | 10200000 | 2015 | nofs | nofs |
| chr11 | E | 11q22.2 | 1 | 10200000 | 3553 | nofs | nofs |
| chr11 | E | 11q22.2 | 1 | 10200000 | 2802 | nofs | nofs |
| chr11 | E | 11q22.3 | 4 | 10300000 | 1849 | nofs | nofs |
| chr11 | E | 11q22.3 | 4 | 10300000 | 1857 | nofs | nofs |
| chr11 | E | 11q22.3 | 4 | 10300000 | 2164 | nofs | nofs |
| chr11 | E | 11q22.3 | 4 | 10300000 | 3069 | nofs | nofs |
| chr11 | E | 11q22.3 | 4 | 10400000 | 3215 | nofs | nofs |
| chr11 | E | 11q22.3 | 4 | 10400000 | 4764 | nofs | nofs |
| chr11 | E | 11q22.3 | 4 | 10400000 | 2680 | nofs | nofs |
| chr11 | E | 11q22.3 | 4 | 10400000 | 2509 | nofs | nofs |
| chr11 | E | 11q22.3 | 4 | 10500000 | 2958 | nofs | nofs |
| chr11 | E | 11q22.3 | 4 | 10500000 | 2273 | nofs | nofs |
| chr11 | E | 11q22.3 | 4 | 10500000 | 2305 | nofs | nofs |
| chr11 | E | 11q22.3 | 4 | 10500000 | 1836 | nofs | nofs |
| chr11 | E | 11q22.3 | 4 | 10600000 | 2882 | nofs | nofs |
| chr11 | E | 11q22.3 | 4 | 10600000 | 2171 | nofs | nofs |
| chr11 | E | 11q22.3 | 4 | 10600000 | 4421 | nofs | nofs |
| chr11 | E | 11q22.3 | 4 | 10600000 | 2458 | nofs | nofs |

|       |   |         |   |           |       |      |                    |
|-------|---|---------|---|-----------|-------|------|--------------------|
| chr11 | E | 11q22.3 | 4 | 107000000 | 2085  | nofs | nofs               |
| chr11 | E | 11q22.3 | 4 | 107000000 | 1883  | nofs | nofs               |
| chr11 | E | 11q22.3 | 4 | 107000000 | 4187  | nofs | nofs               |
| chr11 | E | 11q22.3 | 4 | 107000000 | 4205  | nofs | nofs               |
| chr11 | E | 11q22.3 | 4 | 108000000 | 1768  | nofs | nofs               |
| chr11 | E | 11q22.3 | 4 | 108000000 | 2508  | nofs | nofs               |
| chr11 | E | 11q22.3 | 4 | 108000000 | 1645  | nofs | nofs               |
| chr11 | E | 11q22.3 | 4 | 108000000 | 2857  | nofs | nofs               |
| chr11 | E | 11q22.3 | 4 | 109000000 | 3791  | nofs | nofs               |
| chr11 | E | 11q22.3 | 4 | 109000000 | 2827  | nofs | nofs               |
| chr11 | E | 11q22.3 | 4 | 109000000 | 1738  | nofs | nofs               |
| chr11 | E | 11q22.3 | 4 | 109000000 | 3018  | nofs | nofs               |
| chr11 | E | 11q22.3 | 4 | 110000000 | 2523  | nofs | nofs               |
| chr11 | E | 11q22.3 | 4 | 110000000 | 2893  | nofs | nofs               |
| chr11 | E | 11q22.3 | 4 | 110000000 | 1238  | nofs | nofs               |
| chr11 | E | 11q23.1 | 1 | 110000000 | 2811  | nofs | nofs               |
| chr11 | E | 11q23.1 | 1 | 111000000 | 2965  | nofs | nofs               |
| chr11 | E | 11q23.1 | 1 | 111000000 | 1875  | nofs | nofs               |
| chr11 | E | 11q23.1 | 1 | 111000000 | 2048  | nofs | nofs               |
| chr11 | E | 11q23.1 | 1 | 111000000 | 4214  | nofs | nofs               |
| chr11 | E | 11q23.1 | 1 | 112000000 | 4096  | nofs | nofs               |
| chr11 | E | 11q23.1 | 1 | 112000000 | 1727  | nofs | nofs               |
| chr11 | E | 11q23.1 | 1 | 112000000 | 2154  | nofs | nofs               |
| chr11 | E | 11q23.1 | 1 | 112000000 | 2186  | nofs | nofs               |
| chr11 | E | 11q23.1 | 1 | 113000000 | 2088  | nofs | nofs               |
| chr11 | E | 11q23.1 | 1 | 113000000 | 2301  | nofs | nofs               |
| chr11 | B | 11q23.2 | . | 113000000 | 3234  | nofs | nofs               |
| chr11 | B | 11q23.2 | . | 113000000 | 2107  | nofs | nofs               |
| chr11 | B | 11q23.2 | . | 114000000 | 2560  | nofs | nofs               |
| chr11 | B | 11q23.2 | . | 114000000 | 23797 | nofs | nofs               |
| chr11 | B | 11q23.2 | . | 114000000 | 6376  | nofs | nofs               |
| chr11 | B | 11q23.2 | . | 114000000 | 2119  | nofs | nofs               |
| chr11 | B | 11q23.3 | . | 115000000 | 3345  | fs   | fs common and rare |
| chr11 | B | 11q23.3 | . | 115000000 | 2155  | fs   | fs common and rare |
| chr11 | B | 11q23.3 | . | 115000000 | 4425  | fs   | fs common and rare |
| chr11 | B | 11q23.3 | . | 115000000 | 1753  | fs   | fs common and rare |

|       |   |         |   |           |      |      |                    |
|-------|---|---------|---|-----------|------|------|--------------------|
| chr11 | B | 11q23.3 | . | 116000000 | 3583 | fs   | fs common and rare |
| chr11 | B | 11q23.3 | . | 116000000 | 2016 | fs   | fs common and rare |
| chr11 | B | 11q23.3 | . | 116000000 | 5342 | fs   | fs common and rare |
| chr11 | B | 11q23.3 | . | 116000000 | 3093 | fs   | fs common and rare |
| chr11 | B | 11q23.3 | . | 117000000 | 3257 | fs   | fs common and rare |
| chr11 | B | 11q23.3 | . | 117000000 | 3043 | fs   | fs common and rare |
| chr11 | B | 11q23.3 | . | 117000000 | 4358 | fs   | fs common and rare |
| chr11 | B | 11q23.3 | . | 117000000 | 2808 | fs   | fs common and rare |
| chr11 | B | 11q23.3 | . | 118000000 | 4455 | fs   | fs common and rare |
| chr11 | B | 11q23.3 | . | 118000000 | 4103 | fs   | fs common and rare |
| chr11 | B | 11q23.3 | . | 118000000 | 3649 | fs   | fs common and rare |
| chr11 | B | 11q23.3 | . | 118000000 | 5002 | fs   | fs common and rare |
| chr11 | B | 11q23.3 | . | 119000000 | 3726 | fs   | fs common and rare |
| chr11 | B | 11q23.3 | . | 119000000 | 4267 | fs   | fs common and rare |
| chr11 | B | 11q23.3 | . | 119000000 | 2756 | fs   | fs common and rare |
| chr11 | B | 11q23.3 | . | 119000000 | 6980 | fs   | fs common and rare |
| chr11 | B | 11q23.3 | . | 120000000 | 3144 | fs   | fs common and rare |
| chr11 | B | 11q23.3 | . | 120000000 | 1378 | fs   | fs common and rare |
| chr11 | B | 11q23.3 | . | 120000000 | 2776 | fs   | fs common and rare |
| chr11 | B | 11q23.3 | . | 120000000 | 2916 | fs   | fs common and rare |
| chr11 | B | 11q23.3 | . | 121000000 | 2980 | fs   | fs common and rare |
| chr11 | B | 11q23.3 | . | 121000000 | 3666 | fs   | fs common and rare |
| chr11 | B | 11q23.3 | . | 121000000 | 2533 | fs   | fs common and rare |
| chr11 | E | 11q24   | 1 | 121000000 | 5462 | nofs | nofs               |
| chr11 | E | 11q24   | 1 | 122000000 | 2515 | nofs | nofs               |
| chr11 | E | 11q24   | 1 | 122000000 | 4116 | nofs | nofs               |
| chr11 | E | 11q24   | 1 | 122000000 | 3093 | nofs | nofs               |
| chr11 | E | 11q24   | 1 | 122000000 | 3308 | nofs | nofs               |
| chr11 | E | 11q24   | 1 | 123000000 | 4077 | nofs | nofs               |
| chr11 | E | 11q24   | 1 | 123000000 | 3323 | nofs | nofs               |
| chr11 | E | 11q24   | 1 | 123000000 | 2285 | nofs | nofs               |
| chr11 | E | 11q24   | 1 | 123000000 | 2748 | nofs | nofs               |
| chr11 | E | 11q24   | 1 | 124000000 | 2846 | nofs | nofs               |
| chr11 | E | 11q24   | 1 | 124000000 | 3267 | nofs | nofs               |
| chr11 | E | 11q24   | 1 | 124000000 | 1600 | nofs | nofs               |
| chr11 | E | 11q24   | 1 | 124000000 | 2889 | nofs | nofs               |

|       |   |       |   |           |      |      |      |
|-------|---|-------|---|-----------|------|------|------|
| chr11 | E | 11q24 | 1 | 125000000 | 3268 | nofs | nofs |
| chr11 | E | 11q24 | 1 | 125000000 | 3739 | nofs | nofs |
| chr11 | E | 11q24 | 1 | 125000000 | 3269 | nofs | nofs |
| chr11 | E | 11q24 | 1 | 125000000 | 2098 | nofs | nofs |
| chr11 | E | 11q24 | 1 | 126000000 | 3545 | nofs | nofs |
| chr11 | E | 11q24 | 1 | 126000000 | 5291 | nofs | nofs |
| chr11 | E | 11q24 | 1 | 126000000 | 2918 | nofs | nofs |
| chr11 | E | 11q24 | 1 | 126000000 | 4468 | nofs | nofs |
| chr11 | E | 11q24 | 1 | 127000000 | 3086 | nofs | nofs |
| chr11 | E | 11q24 | 1 | 127000000 | 4060 | nofs | nofs |
| chr11 | E | 11q24 | 1 | 127000000 | 2591 | nofs | nofs |
| chr11 | E | 11q24 | 1 | 127000000 | 3501 | nofs | nofs |
| chr11 | E | 11q24 | 1 | 128000000 | 2272 | nofs | nofs |
| chr11 | E | 11q24 | 1 | 128000000 | 2331 | nofs | nofs |
| chr11 | E | 11q24 | 1 | 128000000 | 2893 | nofs | nofs |
| chr11 | E | 11q24 | 1 | 128000000 | 2811 | nofs | nofs |
| chr11 | E | 11q24 | 1 | 129000000 | 2895 | nofs | nofs |
| chr11 | E | 11q24 | 1 | 129000000 | 3422 | nofs | nofs |
| chr11 | E | 11q24 | 1 | 129000000 | 4928 | nofs | nofs |
| chr11 | E | 11q24 | 1 | 129000000 | 4986 | nofs | nofs |
| chr11 | E | 11q24 | 1 | 130000000 | 2021 | nofs | nofs |
| chr11 | E | 11q24 | 1 | 130000000 | 3998 | nofs | nofs |
| chr11 | E | 11q24 | 1 | 130000000 | 2348 | nofs | nofs |
| chr11 | B | 11q25 | . | 130000000 | 2272 | nofs | nofs |
| chr11 | B | 11q25 | . | 131000000 | 4945 | nofs | nofs |
| chr11 | B | 11q25 | . | 131000000 | 2916 | nofs | nofs |
| chr11 | B | 11q25 | . | 131000000 | 6224 | nofs | nofs |
| chr11 | T | 11q25 | . | 131000000 | 4887 | nofs | nofs |
| chr11 | T | 11q25 | . | 132000000 | 2476 | nofs | nofs |
| chr11 | T | 11q25 | . | 132000000 | 3308 | nofs | nofs |
| chr11 | T | 11q25 | . | 132000000 | 2590 | nofs | nofs |
| chr11 | T | 11q25 | . | 132000000 | 3480 | nofs | nofs |
| chr11 | T | 11q25 | . | 133000000 | 3313 | nofs | nofs |
| chr11 | T | 11q25 | . | 133000000 | 5513 | nofs | nofs |
| chr11 | T | 11q25 | . | 133000000 | 4265 | nofs | nofs |
| chr11 | T | 11q25 | . | 133000000 | 8962 | nofs | nofs |



|       |   |         |   |           |       |      |      |
|-------|---|---------|---|-----------|-------|------|------|
| chr11 | T | 11q25   | . | 134000000 | 8140  | nofs | nofs |
| chr11 | T | 11q25   | . | 134000000 | 13643 | nofs | nofs |
| chr11 | T | 11q25   | . | 134000000 | 11852 | nofs | nofs |
| chr12 | T | 12p13.3 | 3 | 125000    | 7021  | nofs | nofs |
| chr12 | T | 12p13.3 | 3 | 375000    | 9579  | nofs | nofs |
| chr12 | T | 12p13.3 | 3 | 625000    | 9151  | nofs | nofs |
| chr12 | T | 12p13.3 | 3 | 875000    | 4033  | nofs | nofs |
| chr12 | T | 12p13.3 | 3 | 1125000   | 12362 | nofs | nofs |
| chr12 | T | 12p13.3 | 3 | 1375000   | 3174  | nofs | nofs |
| chr12 | T | 12p13.3 | 3 | 1625000   | 5240  | nofs | nofs |
| chr12 | T | 12p13.3 | 3 | 1875000   | 7012  | nofs | nofs |
| chr12 | T | 12p13.3 | 3 | 2125000   | 4748  | nofs | nofs |
| chr12 | T | 12p13.3 | 3 | 2375000   | 4487  | nofs | nofs |
| chr12 | T | 12p13.3 | 3 | 2625000   | 7035  | nofs | nofs |
| chr12 | T | 12p13.3 | 3 | 2875000   | 5446  | nofs | nofs |
| chr12 | T | 12p13.3 | 3 | 3125000   | 5998  | nofs | nofs |
| chr12 | E | 12p13.3 | 3 | 3375000   | 2177  | nofs | nofs |
| chr12 | E | 12p13.3 | 3 | 3625000   | 3794  | nofs | nofs |
| chr12 | E | 12p13.3 | 3 | 3875000   | 2786  | nofs | nofs |
| chr12 | E | 12p13.3 | 3 | 4125000   | 3346  | nofs | nofs |
| chr12 | E | 12p13.3 | 3 | 4375000   | 2169  | nofs | nofs |
| chr12 | E | 12p13.3 | 3 | 4625000   | 2440  | nofs | nofs |
| chr12 | E | 12p13.3 | 3 | 4875000   | 3769  | nofs | nofs |
| chr12 | E | 12p13.3 | 3 | 5125000   | 2664  | nofs | nofs |
| chr12 | E | 12p13.3 | 3 | 5375000   | 2707  | nofs | nofs |
| chr12 | E | 12p13.3 | 3 | 5625000   | 5164  | nofs | nofs |
| chr12 | E | 12p13.3 | 3 | 5875000   | 8837  | nofs | nofs |
| chr12 | E | 12p13.3 | 3 | 6125000   | 3025  | nofs | nofs |
| chr12 | E | 12p13.3 | 3 | 6375000   | 6540  | nofs | nofs |
| chr12 | E | 12p13.3 | 3 | 6625000   | 3073  | nofs | nofs |
| chr12 | E | 12p13.3 | 3 | 6875000   | 3760  | nofs | nofs |
| chr12 | E | 12p13.3 | 3 | 7125000   | 5557  | nofs | nofs |
| chr12 | E | 12p13.3 | 3 | 7375000   | 3641  | nofs | nofs |
| chr12 | E | 12p13.3 | 3 | 7625000   | 4174  | nofs | nofs |
| chr12 | E | 12p13.3 | 3 | 7875000   | 8686  | nofs | nofs |
| chr12 | E | 12p13.3 | 3 | 8125000   | 5003  | nofs | nofs |

|       |   |         |   |          |      |      |      |
|-------|---|---------|---|----------|------|------|------|
| chr12 | E | 12p13.3 | 3 | 8375000  | 4596 | nofs | nofs |
| chr12 | E | 12p13.3 | 3 | 8625000  | 2525 | nofs | nofs |
| chr12 | E | 12p13.3 | 3 | 8875000  | 3629 | nofs | nofs |
| chr12 | E | 12p13.3 | 3 | 9125000  | 4036 | nofs | nofs |
| chr12 | E | 12p13.3 | 3 | 9375000  | 7346 | nofs | nofs |
| chr12 | E | 12p13.3 | 3 | 9625000  | 3754 | nofs | nofs |
| chr12 | E | 12p13.3 | 3 | 9875000  | 3450 | nofs | nofs |
| chr12 | E | 12p13.3 | 3 | 10125000 | 2652 | nofs | nofs |
| chr12 | B | 12p13.2 | . | 10375000 | 3146 | nofs | nofs |
| chr12 | B | 12p13.2 | . | 10625000 | 3253 | nofs | nofs |
| chr12 | B | 12p13.2 | . | 10875000 | 2428 | nofs | nofs |
| chr12 | B | 12p13.2 | . | 11125000 | 1903 | nofs | nofs |
| chr12 | B | 12p13.2 | . | 11375000 | 5106 | nofs | nofs |
| chr12 | B | 12p13.2 | . | 11625000 | 2858 | nofs | nofs |
| chr12 | B | 12p13.2 | . | 11875000 | 1770 | nofs | nofs |
| chr12 | B | 12p13.2 | . | 12125000 | 3420 | nofs | nofs |
| chr12 | B | 12p13.2 | . | 12375000 | 4758 | nofs | nofs |
| chr12 | B | 12p13.2 | . | 12625000 | 4238 | nofs | nofs |
| chr12 | B | 12p13.2 | . | 12875000 | 4341 | nofs | nofs |
| chr12 | B | 12p13.1 | . | 13125000 | 4526 | nofs | nofs |
| chr12 | B | 12p13.1 | . | 13375000 | 1781 | nofs | nofs |
| chr12 | B | 12p13.1 | . | 13625000 | 3100 | nofs | nofs |
| chr12 | B | 12p13.1 | . | 13875000 | 1173 | nofs | nofs |
| chr12 | B | 12p13.1 | . | 14125000 | 4849 | nofs | nofs |
| chr12 | B | 12p13.1 | . | 14375000 | 4639 | nofs | nofs |
| chr12 | B | 12p13.1 | . | 14625000 | 2777 | nofs | nofs |
| chr12 | B | 12p13.1 | . | 14875000 | 1952 | nofs | nofs |
| chr12 | B | 12p12.3 | . | 15125000 | 1799 | nofs | nofs |
| chr12 | B | 12p12.3 | . | 15375000 | 2048 | nofs | nofs |
| chr12 | B | 12p12.3 | . | 15625000 | 2282 | nofs | nofs |
| chr12 | B | 12p12.3 | . | 15875000 | 1652 | nofs | nofs |
| chr12 | B | 12p12.3 | . | 16125000 | 1734 | nofs | nofs |
| chr12 | B | 12p12.3 | . | 16375000 | 2841 | nofs | nofs |
| chr12 | B | 12p12.3 | . | 16625000 | 1733 | nofs | nofs |
| chr12 | B | 12p12.3 | . | 16875000 | 2112 | nofs | nofs |
| chr12 | B | 12p12.3 | . | 17125000 | 2255 | nofs | nofs |

|       |   |         |   |          |      |      |      |
|-------|---|---------|---|----------|------|------|------|
| chr12 | B | 12p12.3 | . | 17375000 | 2610 | nofs | nofs |
| chr12 | B | 12p12.3 | . | 17625000 | 2078 | nofs | nofs |
| chr12 | B | 12p12.3 | . | 17875000 | 2107 | nofs | nofs |
| chr12 | B | 12p12.3 | . | 18125000 | 5762 | nofs | nofs |
| chr12 | B | 12p12.3 | . | 18375000 | 2840 | nofs | nofs |
| chr12 | B | 12p12.3 | . | 18625000 | 1478 | nofs | nofs |
| chr12 | B | 12p12.3 | . | 18875000 | 2511 | nofs | nofs |
| chr12 | B | 12p12.3 | . | 19125000 | 2305 | nofs | nofs |
| chr12 | B | 12p12.3 | . | 19375000 | 3303 | nofs | nofs |
| chr12 | B | 12p12.3 | . | 19625000 | 3176 | nofs | nofs |
| chr12 | B | 12p12.3 | . | 19875000 | 2795 | nofs | nofs |
| chr12 | B | 12p12.2 | . | 20125000 | 4501 | nofs | nofs |
| chr12 | B | 12p12.2 | . | 20375000 | 4059 | nofs | nofs |
| chr12 | B | 12p12.2 | . | 20625000 | 2162 | nofs | nofs |
| chr12 | B | 12p12.2 | . | 20875000 | 3680 | nofs | nofs |
| chr12 | B | 12p12.1 | . | 21125000 | 1337 | nofs | nofs |
| chr12 | B | 12p12.1 | . | 21375000 | 2262 | nofs | nofs |
| chr12 | B | 12p12.1 | . | 21625000 | 3147 | nofs | nofs |
| chr12 | B | 12p12.1 | . | 21875000 | 1637 | nofs | nofs |
| chr12 | B | 12p12.1 | . | 22125000 | 2671 | nofs | nofs |
| chr12 | B | 12p12.1 | . | 22375000 | 3765 | nofs | nofs |
| chr12 | B | 12p12.1 | . | 22625000 | 3045 | nofs | nofs |
| chr12 | B | 12p12.1 | . | 22875000 | 3160 | nofs | nofs |
| chr12 | B | 12p12.1 | . | 23125000 | 3256 | nofs | nofs |
| chr12 | B | 12p12.1 | . | 23375000 | 1525 | nofs | nofs |
| chr12 | B | 12p12.1 | . | 23625000 | 2310 | nofs | nofs |
| chr12 | B | 12p12.1 | . | 23875000 | 3625 | nofs | nofs |
| chr12 | B | 12p12.1 | . | 24125000 | 2808 | nofs | nofs |
| chr12 | B | 12p12.1 | . | 24375000 | 1964 | nofs | nofs |
| chr12 | B | 12p12.1 | . | 24625000 | 1512 | nofs | nofs |
| chr12 | B | 12p12.1 | . | 24875000 | 2930 | nofs | nofs |
| chr12 | B | 12p12.1 | . | 25125000 | 3295 | nofs | nofs |
| chr12 | B | 12p12.1 | . | 25375000 | 2886 | nofs | nofs |
| chr12 | B | 12p12.1 | . | 25625000 | 1784 | nofs | nofs |
| chr12 | B | 12p12.1 | . | 25875000 | 2027 | nofs | nofs |
| chr12 | B | 12p12.1 | . | 26125000 | 2285 | nofs | nofs |

|       |   |         |   |          |        |      |      |
|-------|---|---------|---|----------|--------|------|------|
| chr12 | B | 12p12.1 | . | 26375000 | 1862   | nofs | nofs |
| chr12 | E | 12p11.2 | 1 | 26625000 | 3396   | nofs | nofs |
| chr12 | E | 12p11.2 | 1 | 26875000 | 4014   | nofs | nofs |
| chr12 | E | 12p11.2 | 1 | 27125000 | 2613   | nofs | nofs |
| chr12 | E | 12p11.2 | 1 | 27375000 | 2825   | nofs | nofs |
| chr12 | E | 12p11.2 | 1 | 27625000 | 1475   | nofs | nofs |
| chr12 | E | 12p11.2 | 1 | 27875000 | 3207   | nofs | nofs |
| chr12 | E | 12p11.2 | 1 | 28125000 | 3890   | nofs | nofs |
| chr12 | E | 12p11.2 | 1 | 28375000 | 2925   | nofs | nofs |
| chr12 | E | 12p11.2 | 1 | 28625000 | 1792   | nofs | nofs |
| chr12 | E | 12p11.2 | 1 | 28875000 | 2669   | nofs | nofs |
| chr12 | E | 12p11.2 | 1 | 29125000 | 4026   | nofs | nofs |
| chr12 | E | 12p11.2 | 1 | 29375000 | 3548   | nofs | nofs |
| chr12 | E | 12p11.2 | 1 | 29625000 | 2862   | nofs | nofs |
| chr12 | E | 12p11.2 | 1 | 29875000 | 2038   | nofs | nofs |
| chr12 | E | 12p11.2 | 1 | 30125000 | 2289   | nofs | nofs |
| chr12 | E | 12p11.2 | 1 | 30375000 | 1960   | nofs | nofs |
| chr12 | E | 12p11.2 | 1 | 30625000 | 1266   | nofs | nofs |
| chr12 | E | 12p11.2 | 1 | 30875000 | 2169   | nofs | nofs |
| chr12 | E | 12p11.2 | 1 | 31125000 | 6232   | nofs | nofs |
| chr12 | E | 12p11.2 | 1 | 31375000 | 4738   | nofs | nofs |
| chr12 | C | 12p11.2 | 1 | 31625000 | 3969   | nofs | nofs |
| chr12 | C | 12p11.2 | 1 | 31875000 | 5116   | nofs | nofs |
| chr12 | C | 12p11.2 | 1 | 32125000 | 5453   | nofs | nofs |
| chr12 | C | 12p11.2 | 1 | 32375000 | 2967   | nofs | nofs |
| chr12 | C | 12p11.2 | 1 | 32625000 | 2321   | nofs | nofs |
| chr12 | C | 12p11.2 | 1 | 32875000 | 4261   | nofs | nofs |
| chr12 | C | 12p11.2 | 1 | 33125000 | 2953   | nofs | nofs |
| chr12 | C | 12p11.1 | . | 33375000 | 2922   | nofs | nofs |
| chr12 | C | 12p11.1 | . | 33625000 | 2064   | nofs | nofs |
| chr12 | C | 12p11.1 | . | 33875000 | 2136   | nofs | nofs |
| chr12 | C | 12p11.1 | . | 34125000 | 3621   | nofs | nofs |
| chr12 | C | 12p11.1 | . | 34375000 | 123919 | nofs | nofs |
| chr12 | C | 12p11.1 | . | 34625000 | 174716 | nofs | nofs |
| chr12 | C |         | . | 34875000 | 0      | nofs | nofs |
| chr12 | C |         | . | 35125000 | 0      | nofs | nofs |

|       |   |   |          |        |      |      |
|-------|---|---|----------|--------|------|------|
| chr12 | C | . | 35375000 | 0      | nofs | nofs |
| chr12 | C | . | 35625000 | 0      | nofs | nofs |
| chr12 | C | . | 35875000 | 0      | nofs | nofs |
| chr12 | C | . | 36125000 | 6975   | nofs | nofs |
| chr12 | C | . | 36375000 | 195951 | nofs | nofs |
| chr12 | C | . | 36625000 | 193880 | nofs | nofs |
| chr12 | C | . | 36875000 | 5340   | nofs | nofs |
| chr12 | C | . | 37125000 | 2807   | nofs | nofs |
| chr12 | C | . | 37375000 | 1403   | nofs | nofs |
| chr12 | C | . | 37625000 | 2069   | nofs | nofs |
| chr12 | C | . | 37875000 | 1978   | nofs | nofs |
| chr12 | C | . | 38125000 | 3201   | nofs | nofs |
| chr12 | C | . | 38375000 | 5539   | nofs | nofs |
| chr12 | C | . | 38625000 | 2897   | nofs | nofs |
| chr12 | C | . | 38875000 | 2932   | nofs | nofs |
| chr12 | C | . | 39125000 | 11980  | nofs | nofs |
| chr12 | B | . | 39375000 | 2415   | nofs | nofs |
| chr12 | B | . | 39625000 | 3824   | nofs | nofs |
| chr12 | B | . | 39875000 | 1970   | nofs | nofs |
| chr12 | B | . | 40125000 | 1869   | nofs | nofs |
| chr12 | B | . | 40375000 | 1940   | nofs | nofs |
| chr12 | B | . | 40625000 | 2041   | nofs | nofs |
| chr12 | B | . | 40875000 | 4560   | nofs | nofs |
| chr12 | B | . | 41125000 | 3785   | nofs | nofs |
| chr12 | B | . | 41375000 | 2681   | nofs | nofs |
| chr12 | B | . | 41625000 | 1437   | nofs | nofs |
| chr12 | B | . | 41875000 | 2057   | nofs | nofs |
| chr12 | B | . | 42125000 | 1666   | nofs | nofs |
| chr12 | B | . | 42375000 | 3538   | nofs | nofs |
| chr12 | B | . | 42625000 | 2463   | nofs | nofs |
| chr12 | B | . | 42875000 | 3047   | nofs | nofs |
| chr12 | B | . | 43125000 | 2786   | nofs | nofs |
| chr12 | B | . | 43375000 | 1845   | nofs | nofs |
| chr12 | B | . | 43625000 | 2361   | nofs | nofs |
| chr12 | B | . | 43875000 | 5675   | nofs | nofs |
| chr12 | B | . | 44125000 | 1996   | nofs | nofs |

|       |   |         |   |          |      |         |      |
|-------|---|---------|---|----------|------|---------|------|
| chr12 | B | 12q12   | . | 44375000 | 3492 | nofs    | nofs |
| chr12 | E | 12q13.1 | 1 | 44625000 | 2899 | fs rare | fs   |
| chr12 | E | 12q13.1 | 1 | 44875000 | 2758 | fs rare | fs   |
| chr12 | E | 12q13.1 | 1 | 45125000 | 1740 | fs rare | fs   |
| chr12 | E | 12q13.1 | 1 | 45375000 | 1743 | fs rare | fs   |
| chr12 | E | 12q13.1 | 1 | 45625000 | 2401 | fs rare | fs   |
| chr12 | E | 12q13.1 | 1 | 45875000 | 2471 | fs rare | fs   |
| chr12 | E | 12q13.1 | 1 | 46125000 | 2095 | fs rare | fs   |
| chr12 | E | 12q13.1 | 1 | 46375000 | 3777 | fs rare | fs   |
| chr12 | E | 12q13.1 | 1 | 46625000 | 4466 | fs rare | fs   |
| chr12 | E | 12q13.1 | 1 | 46875000 | 2921 | fs rare | fs   |
| chr12 | E | 12q13.1 | 1 | 47125000 | 4213 | fs rare | fs   |
| chr12 | E | 12q13.1 | 1 | 47375000 | 4883 | fs rare | fs   |
| chr12 | E | 12q13.1 | 1 | 47625000 | 5150 | fs rare | fs   |
| chr12 | E | 12q13.1 | 1 | 47875000 | 7198 | fs rare | fs   |
| chr12 | E | 12q13.1 | 1 | 48125000 | 5521 | fs rare | fs   |
| chr12 | E | 12q13.1 | 1 | 48375000 | 2095 | fs rare | fs   |
| chr12 | E | 12q13.1 | 1 | 48625000 | 5676 | fs rare | fs   |
| chr12 | E | 12q13.1 | 1 | 48875000 | 5534 | fs rare | fs   |
| chr12 | E | 12q13.1 | 1 | 49125000 | 6847 | fs rare | fs   |
| chr12 | E | 12q13.1 | 1 | 49375000 | 2255 | fs rare | fs   |
| chr12 | E | 12q13.1 | 1 | 49625000 | 4728 | fs rare | fs   |
| chr12 | E | 12q13.1 | 1 | 49875000 | 4509 | fs rare | fs   |
| chr12 | E | 12q13.1 | 1 | 50125000 | 2609 | fs rare | fs   |
| chr12 | E | 12q13.1 | 1 | 50375000 | 2112 | fs rare | fs   |
| chr12 | E | 12q13.1 | 1 | 50625000 | 1804 | fs rare | fs   |
| chr12 | E | 12q13.1 | 1 | 50875000 | 8651 | fs rare | fs   |
| chr12 | E | 12q13.1 | 1 | 51125000 | 2572 | fs rare | fs   |
| chr12 | E | 12q13.1 | 1 | 51375000 | 3145 | fs rare | fs   |
| chr12 | E | 12q13.1 | 1 | 51625000 | 5610 | fs rare | fs   |
| chr12 | E | 12q13.1 | 1 | 51875000 | 4116 | fs rare | fs   |
| chr12 | E | 12q13.1 | 1 | 52125000 | 5661 | fs rare | fs   |
| chr12 | E | 12q13.1 | 1 | 52375000 | 5345 | fs rare | fs   |
| chr12 | E | 12q13.1 | 1 | 52625000 | 3000 | fs rare | fs   |
| chr12 | E | 12q13.1 | 1 | 52875000 | 2377 | fs rare | fs   |
| chr12 | E | 12q13.1 | 1 | 53125000 | 4442 | fs rare | fs   |

|       |   |         |   |          |       |      |      |
|-------|---|---------|---|----------|-------|------|------|
| chr12 | E | 12q13.2 | 4 | 53375000 | 2453  | nofs | nofs |
| chr12 | E | 12q13.2 | 4 | 53625000 | 1244  | nofs | nofs |
| chr12 | E | 12q13.2 | 4 | 53875000 | 2329  | nofs | nofs |
| chr12 | E | 12q13.2 | 4 | 54125000 | 3010  | nofs | nofs |
| chr12 | E | 12q13.2 | 4 | 54375000 | 3528  | nofs | nofs |
| chr12 | E | 12q13.2 | 4 | 54625000 | 3566  | nofs | nofs |
| chr12 | E | 12q13.2 | 4 | 54875000 | 4475  | nofs | nofs |
| chr12 | E | 12q13.3 | 3 | 55125000 | 6320  | nofs | nofs |
| chr12 | E | 12q13.3 | 3 | 55375000 | 8698  | nofs | nofs |
| chr12 | E | 12q13.3 | 3 | 55625000 | 3822  | nofs | nofs |
| chr12 | E | 12q13.3 | 3 | 55875000 | 4687  | nofs | nofs |
| chr12 | E | 12q13.3 | 3 | 56125000 | 6644  | nofs | nofs |
| chr12 | E | 12q13.3 | 3 | 56375000 | 2921  | nofs | nofs |
| chr12 | E | 12q13.3 | 3 | 56625000 | 3673  | nofs | nofs |
| chr12 | E | 12q14   | 1 | 56875000 | 2185  | nofs | nofs |
| chr12 | E | 12q14   | 1 | 57125000 | 2331  | nofs | nofs |
| chr12 | E | 12q14   | 1 | 57375000 | 1986  | nofs | nofs |
| chr12 | E | 12q14   | 1 | 57625000 | 2477  | nofs | nofs |
| chr12 | E | 12q14   | 1 | 57875000 | 1894  | nofs | nofs |
| chr12 | E | 12q14   | 1 | 58125000 | 20554 | nofs | nofs |
| chr12 | E | 12q14   | 1 | 58375000 | 2193  | nofs | nofs |
| chr12 | E | 12q14   | 1 | 58625000 | 2851  | nofs | nofs |
| chr12 | E | 12q14   | 1 | 58875000 | 2057  | nofs | nofs |
| chr12 | E | 12q14   | 1 | 59125000 | 2439  | nofs | nofs |
| chr12 | E | 12q14   | 1 | 59375000 | 3118  | nofs | nofs |
| chr12 | E | 12q14   | 1 | 59625000 | 3433  | nofs | nofs |
| chr12 | E | 12q14   | 1 | 59875000 | 1927  | nofs | nofs |
| chr12 | E | 12q14   | 1 | 60125000 | 1315  | nofs | nofs |
| chr12 | E | 12q14   | 1 | 60375000 | 2044  | nofs | nofs |
| chr12 | E | 12q14   | 1 | 60625000 | 2924  | nofs | nofs |
| chr12 | E | 12q14   | 1 | 60875000 | 1886  | nofs | nofs |
| chr12 | E | 12q14   | 1 | 61125000 | 1925  | nofs | nofs |
| chr12 | E | 12q14   | 1 | 61375000 | 1766  | nofs | nofs |
| chr12 | E | 12q14   | 1 | 61625000 | 1893  | nofs | nofs |
| chr12 | E | 12q14   | 1 | 61875000 | 2145  | nofs | nofs |
| chr12 | E | 12q14   | 1 | 62125000 | 3216  | nofs | nofs |

|       |   |         |   |          |      |      |      |
|-------|---|---------|---|----------|------|------|------|
| chr12 | E | 12q14   | 1 | 62375000 | 2853 | nofs | nofs |
| chr12 | E | 12q14   | 1 | 62625000 | 2871 | nofs | nofs |
| chr12 | E | 12q14   | 1 | 62875000 | 2908 | nofs | nofs |
| chr12 | E | 12q14   | 1 | 63125000 | 4147 | nofs | nofs |
| chr12 | E | 12q14   | 1 | 63375000 | 3799 | nofs | nofs |
| chr12 | E | 12q14   | 1 | 63625000 | 1616 | nofs | nofs |
| chr12 | E | 12q14   | 1 | 63875000 | 2446 | nofs | nofs |
| chr12 | E | 12q14   | 1 | 64125000 | 1170 | nofs | nofs |
| chr12 | E | 12q14   | 1 | 64375000 | 2324 | nofs | nofs |
| chr12 | E | 12q14   | 1 | 64625000 | 4471 | nofs | nofs |
| chr12 | E | 12q14   | 1 | 64875000 | 4776 | nofs | nofs |
| chr12 | E | 12q14   | 1 | 65125000 | 1323 | nofs | nofs |
| chr12 | E | 12q14   | 1 | 65375000 | 1857 | nofs | nofs |
| chr12 | E | 12q14   | 1 | 65625000 | 1417 | nofs | nofs |
| chr12 | E | 12q14   | 1 | 65875000 | 2063 | nofs | nofs |
| chr12 | E | 12q14   | 1 | 66125000 | 1972 | nofs | nofs |
| chr12 | B | 12q15   | . | 66375000 | 2086 | nofs | nofs |
| chr12 | B | 12q15   | . | 66625000 | 1378 | nofs | nofs |
| chr12 | B | 12q15   | . | 66875000 | 1642 | nofs | nofs |
| chr12 | B | 12q15   | . | 67125000 | 2581 | nofs | nofs |
| chr12 | B | 12q15   | . | 67375000 | 2653 | nofs | nofs |
| chr12 | B | 12q15   | . | 67625000 | 2748 | nofs | nofs |
| chr12 | B | 12q15   | . | 67875000 | 4852 | nofs | nofs |
| chr12 | B | 12q15   | . | 68125000 | 3224 | nofs | nofs |
| chr12 | B | 12q15   | . | 68375000 | 3406 | nofs | nofs |
| chr12 | B | 12q15   | . | 68625000 | 3417 | nofs | nofs |
| chr12 | B | 12q15   | . | 68875000 | 4419 | nofs | nofs |
| chr12 | B | 12q15   | . | 69125000 | 1734 | nofs | nofs |
| chr12 | B | 12q15   | . | 69375000 | 2584 | nofs | nofs |
| chr12 | B | 12q15   | . | 69625000 | 8038 | nofs | nofs |
| chr12 | B | 12q15   | . | 69875000 | 2315 | nofs | nofs |
| chr12 | E | 12q21.1 | 1 | 70125000 | 3111 | nofs | nofs |
| chr12 | E | 12q21.1 | 1 | 70375000 | 2833 | nofs | nofs |
| chr12 | E | 12q21.1 | 1 | 70625000 | 1583 | nofs | nofs |
| chr12 | E | 12q21.1 | 1 | 70875000 | 2551 | nofs | nofs |
| chr12 | E | 12q21.1 | 1 | 71125000 | 1784 | nofs | nofs |



|       |   |         |   |          |       |      |           |
|-------|---|---------|---|----------|-------|------|-----------|
| chr12 | E | 12q21.1 | 1 | 71375000 | 2229  | nofs | nofs      |
| chr12 | E | 12q21.1 | 1 | 71625000 | 2511  | nofs | nofs      |
| chr12 | E | 12q21.1 | 1 | 71875000 | 2321  | nofs | nofs      |
| chr12 | E | 12q21.1 | 1 | 72125000 | 2282  | nofs | nofs      |
| chr12 | E | 12q21.1 | 1 | 72375000 | 3749  | nofs | nofs      |
| chr12 | E | 12q21.1 | 1 | 72625000 | 3300  | nofs | nofs      |
| chr12 | E | 12q21.1 | 1 | 72875000 | 2151  | nofs | nofs      |
| chr12 | E | 12q21.1 | 1 | 73125000 | 1829  | nofs | nofs      |
| chr12 | E | 12q21.1 | 1 | 73375000 | 4553  | nofs | nofs      |
| chr12 | E | 12q21.1 | 1 | 73625000 | 2680  | nofs | nofs      |
| chr12 | E | 12q21.1 | 1 | 73875000 | 3237  | nofs | nofs      |
| chr12 | E | 12q21.1 | 1 | 74125000 | 1764  | nofs | nofs      |
| chr12 | E | 12q21.1 | 1 | 74375000 | 1660  | nofs | nofs      |
| chr12 | E | 12q21.2 | 1 | 74625000 | 3392  | nofs | nofs      |
| chr12 | E | 12q21.2 | 1 | 74875000 | 95    | nofs | nofs      |
| chr12 | E | 12q21.2 | 1 | 75125000 | 2879  | nofs | nofs      |
| chr12 | E | 12q21.2 | 1 | 75375000 | 1706  | nofs | nofs      |
| chr12 | E | 12q21.2 | 1 | 75625000 | 3120  | nofs | nofs      |
| chr12 | E | 12q21.2 | 1 | 75875000 | 2203  | nofs | nofs      |
| chr12 | E | 12q21.2 | 1 | 76125000 | 2118  | nofs | nofs      |
| chr12 | E | 12q21.2 | 1 | 76375000 | 1973  | nofs | nofs      |
| chr12 | E | 12q21.2 | 1 | 76625000 | 2006  | nofs | nofs      |
| chr12 | E | 12q21.2 | 1 | 76875000 | 2520  | nofs | nofs      |
| chr12 | E | 12q21.2 | 1 | 77125000 | 2791  | nofs | nofs      |
| chr12 | E | 12q21.2 | 1 | 77375000 | 2024  | nofs | nofs      |
| chr12 | E | 12q21.2 | 1 | 77625000 | 4367  | nofs | nofs      |
| chr12 | E | 12q21.2 | 1 | 77875000 | 2658  | nofs | nofs      |
| chr12 | E | 12q21.2 | 1 | 78125000 | 3700  | nofs | nofs      |
| chr12 | E | 12q21.2 | 1 | 78375000 | 22994 | nofs | nofs      |
| chr12 | E | 12q21.2 | 1 | 78625000 | 2374  | nofs | nofs      |
| chr12 | E | 12q21.2 | 1 | 78875000 | 2614  | nofs | nofs      |
| chr12 | B | 12q21.3 | . | 79125000 | 3515  | fs   | fs common |
| chr12 | B | 12q21.3 | . | 79375000 | 2570  | fs   | fs common |
| chr12 | B | 12q21.3 | . | 79625000 | 2513  | fs   | fs common |
| chr12 | B | 12q21.3 | . | 79875000 | 2589  | fs   | fs common |
| chr12 | B | 12q21.3 | . | 80125000 | 2298  | fs   | fs common |

|       |   |         |   |          |      |    |           |
|-------|---|---------|---|----------|------|----|-----------|
| chr12 | B | 12q21.3 | . | 80375000 | 2919 | fs | fs common |
| chr12 | B | 12q21.3 | . | 80625000 | 2561 | fs | fs common |
| chr12 | B | 12q21.3 | . | 80875000 | 3799 | fs | fs common |
| chr12 | B | 12q21.3 | . | 81125000 | 1863 | fs | fs common |
| chr12 | B | 12q21.3 | . | 81375000 | 2768 | fs | fs common |
| chr12 | B | 12q21.3 | . | 81625000 | 5838 | fs | fs common |
| chr12 | B | 12q21.3 | . | 81875000 | 4025 | fs | fs common |
| chr12 | B | 12q21.3 | . | 82125000 | 2564 | fs | fs common |
| chr12 | B | 12q21.3 | . | 82375000 | 2180 | fs | fs common |
| chr12 | B | 12q21.3 | . | 82625000 | 2703 | fs | fs common |
| chr12 | B | 12q21.3 | . | 82875000 | 2612 | fs | fs common |
| chr12 | B | 12q21.3 | . | 83125000 | 2705 | fs | fs common |
| chr12 | B | 12q21.3 | . | 83375000 | 1560 | fs | fs common |
| chr12 | B | 12q21.3 | . | 83625000 | 3459 | fs | fs common |
| chr12 | B | 12q21.3 | . | 83875000 | 2068 | fs | fs common |
| chr12 | B | 12q21.3 | . | 84125000 | 3605 | fs | fs common |
| chr12 | B | 12q21.3 | . | 84375000 | 1976 | fs | fs common |
| chr12 | B | 12q21.3 | . | 84625000 | 1897 | fs | fs common |
| chr12 | B | 12q21.3 | . | 84875000 | 3269 | fs | fs common |
| chr12 | B | 12q21.3 | . | 85125000 | 3092 | fs | fs common |
| chr12 | B | 12q21.3 | . | 85375000 | 4638 | fs | fs common |
| chr12 | B | 12q21.3 | . | 85625000 | 2854 | fs | fs common |
| chr12 | B | 12q21.3 | . | 85875000 | 3201 | fs | fs common |
| chr12 | B | 12q21.3 | . | 86125000 | 2115 | fs | fs common |
| chr12 | B | 12q21.3 | . | 86375000 | 3240 | fs | fs common |
| chr12 | B | 12q21.3 | . | 86625000 | 1551 | fs | fs common |
| chr12 | B | 12q21.3 | . | 86875000 | 1946 | fs | fs common |
| chr12 | B | 12q21.3 | . | 87125000 | 2451 | fs | fs common |
| chr12 | B | 12q21.3 | . | 87375000 | 2393 | fs | fs common |
| chr12 | B | 12q21.3 | . | 87625000 | 6672 | fs | fs common |
| chr12 | B | 12q21.3 | . | 87875000 | 2634 | fs | fs common |
| chr12 | B | 12q21.3 | . | 88125000 | 2413 | fs | fs common |
| chr12 | B | 12q21.3 | . | 88375000 | 2296 | fs | fs common |
| chr12 | B | 12q21.3 | . | 88625000 | 1969 | fs | fs common |
| chr12 | B | 12q21.3 | . | 88875000 | 5326 | fs | fs common |
| chr12 | B | 12q21.3 | . | 89125000 | 2336 | fs | fs common |

|       |   |         |   |          |      |      |           |
|-------|---|---------|---|----------|------|------|-----------|
| chr12 | B | 12q21.3 | . | 89375000 | 3612 | fs   | fs common |
| chr12 | B | 12q21.3 | . | 89625000 | 3808 | fs   | fs common |
| chr12 | B | 12q21.3 | . | 89875000 | 2138 | fs   | fs common |
| chr12 | B | 12q21.3 | . | 90125000 | 2439 | fs   | fs common |
| chr12 | B | 12q21.3 | . | 90375000 | 1825 | fs   | fs common |
| chr12 | B | 12q21.3 | . | 90625000 | 3297 | fs   | fs common |
| chr12 | B | 12q21.3 | . | 90875000 | 2086 | fs   | fs common |
| chr12 | B | 12q21.3 | . | 91125000 | 3031 | fs   | fs common |
| chr12 | B | 12q21.3 | . | 91375000 | 3133 | fs   | fs common |
| chr12 | E | 12q22   | 1 | 91625000 | 3667 | nofs | nofs      |
| chr12 | E | 12q22   | 1 | 91875000 | 3034 | nofs | nofs      |
| chr12 | E | 12q22   | 1 | 92125000 | 3206 | nofs | nofs      |
| chr12 | E | 12q22   | 1 | 92375000 | 3243 | nofs | nofs      |
| chr12 | E | 12q22   | 1 | 92625000 | 1678 | nofs | nofs      |
| chr12 | E | 12q22   | 1 | 92875000 | 2689 | nofs | nofs      |
| chr12 | E | 12q22   | 1 | 93125000 | 2396 | nofs | nofs      |
| chr12 | E | 12q22   | 1 | 93375000 | 2641 | nofs | nofs      |
| chr12 | E | 12q22   | 1 | 93625000 | 2160 | nofs | nofs      |
| chr12 | E | 12q22   | 1 | 93875000 | 2339 | nofs | nofs      |
| chr12 | E | 12q22   | 1 | 94125000 | 5747 | nofs | nofs      |
| chr12 | E | 12q22   | 1 | 94375000 | 3701 | nofs | nofs      |
| chr12 | E | 12q22   | 1 | 94625000 | 6712 | nofs | nofs      |
| chr12 | E | 12q22   | 1 | 94875000 | 4998 | nofs | nofs      |
| chr12 | E | 12q23   | 5 | 95125000 | 3740 | nofs | nofs      |
| chr12 | E | 12q23   | 5 | 95375000 | 3342 | nofs | nofs      |
| chr12 | E | 12q23   | 5 | 95625000 | 4176 | nofs | nofs      |
| chr12 | E | 12q23   | 5 | 95875000 | 2416 | nofs | nofs      |
| chr12 | E | 12q23   | 5 | 96125000 | 2466 | nofs | nofs      |
| chr12 | E | 12q23   | 5 | 96375000 | 2582 | nofs | nofs      |
| chr12 | E | 12q23   | 5 | 96625000 | 2546 | nofs | nofs      |
| chr12 | E | 12q23   | 5 | 96875000 | 4998 | nofs | nofs      |
| chr12 | E | 12q23   | 5 | 97125000 | 1672 | nofs | nofs      |
| chr12 | E | 12q23   | 5 | 97375000 | 2560 | nofs | nofs      |
| chr12 | E | 12q23   | 5 | 97625000 | 2082 | nofs | nofs      |
| chr12 | E | 12q23   | 5 | 97875000 | 2609 | nofs | nofs      |
| chr12 | E | 12q23   | 5 | 98125000 | 2333 | nofs | nofs      |

|       |   |       |   |           |      |      |      |
|-------|---|-------|---|-----------|------|------|------|
| chr12 | E | 12q23 | 5 | 98375000  | 1874 | nofs | nofs |
| chr12 | E | 12q23 | 5 | 98625000  | 1605 | nofs | nofs |
| chr12 | E | 12q23 | 5 | 98875000  | 1642 | nofs | nofs |
| chr12 | E | 12q23 | 5 | 99125000  | 4528 | nofs | nofs |
| chr12 | E | 12q23 | 5 | 99375000  | 2514 | nofs | nofs |
| chr12 | E | 12q23 | 5 | 99625000  | 2046 | nofs | nofs |
| chr12 | E | 12q23 | 5 | 99875000  | 2215 | nofs | nofs |
| chr12 | E | 12q23 | 5 | 100000000 | 2579 | nofs | nofs |
| chr12 | E | 12q23 | 5 | 100000000 | 3871 | nofs | nofs |
| chr12 | E | 12q23 | 5 | 101000000 | 1558 | nofs | nofs |
| chr12 | E | 12q23 | 5 | 101000000 | 4475 | nofs | nofs |
| chr12 | E | 12q23 | 5 | 101000000 | 1279 | nofs | nofs |
| chr12 | E | 12q23 | 5 | 101000000 | 1864 | nofs | nofs |
| chr12 | E | 12q23 | 5 | 102000000 | 3137 | nofs | nofs |
| chr12 | E | 12q23 | 5 | 102000000 | 3407 | nofs | nofs |
| chr12 | E | 12q23 | 5 | 102000000 | 2988 | nofs | nofs |
| chr12 | E | 12q23 | 5 | 102000000 | 2024 | nofs | nofs |
| chr12 | E | 12q23 | 5 | 103000000 | 3278 | nofs | nofs |
| chr12 | E | 12q23 | 5 | 103000000 | 4354 | nofs | nofs |
| chr12 | E | 12q23 | 5 | 103000000 | 2571 | nofs | nofs |
| chr12 | E | 12q23 | 5 | 103000000 | 3456 | nofs | nofs |
| chr12 | E | 12q23 | 5 | 104000000 | 2487 | nofs | nofs |
| chr12 | E | 12q23 | 5 | 104000000 | 2908 | nofs | nofs |
| chr12 | E | 12q23 | 5 | 104000000 | 2281 | nofs | nofs |
| chr12 | E | 12q23 | 5 | 104000000 | 3010 | nofs | nofs |
| chr12 | E | 12q23 | 5 | 105000000 | 2595 | nofs | nofs |
| chr12 | E | 12q23 | 5 | 105000000 | 2496 | nofs | nofs |
| chr12 | E | 12q23 | 5 | 105000000 | 2828 | nofs | nofs |
| chr12 | E | 12q23 | 5 | 105000000 | 1752 | nofs | nofs |
| chr12 | E | 12q23 | 5 | 106000000 | 1833 | nofs | nofs |
| chr12 | E | 12q23 | 5 | 106000000 | 3052 | nofs | nofs |
| chr12 | E | 12q23 | 5 | 106000000 | 3432 | nofs | nofs |
| chr12 | E | 12q23 | 5 | 106000000 | 3814 | nofs | nofs |
| chr12 | E | 12q23 | 5 | 107000000 | 2501 | nofs | nofs |
| chr12 | E | 12q23 | 5 | 107000000 | 7079 | nofs | nofs |
| chr12 | E | 12q23 | 5 | 107000000 | 3877 | nofs | nofs |

|       |   |         |   |           |      |      |      |                    |
|-------|---|---------|---|-----------|------|------|------|--------------------|
| chr12 | E | 12q23   | 5 | 107000000 | 5099 | nofs | nofs | fs common and rare |
| chr12 | E | 12q23   | 5 | 108000000 | 5602 | nofs | nofs | fs common and rare |
| chr12 | E | 12q24.1 | 5 | 108000000 | 3155 | fs   | fs   | fs common and rare |
| chr12 | E | 12q24.1 | 5 | 108000000 | 3961 | fs   | fs   | fs common and rare |
| chr12 | E | 12q24.1 | 5 | 108000000 | 2679 | fs   | fs   | fs common and rare |
| chr12 | E | 12q24.1 | 5 | 109000000 | 7182 | fs   | fs   | fs common and rare |
| chr12 | E | 12q24.1 | 5 | 109000000 | 3470 | fs   | fs   | fs common and rare |
| chr12 | E | 12q24.1 | 5 | 109000000 | 6440 | fs   | fs   | fs common and rare |
| chr12 | E | 12q24.1 | 5 | 109000000 | 4837 | fs   | fs   | fs common and rare |
| chr12 | E | 12q24.1 | 5 | 110000000 | 5873 | fs   | fs   | fs common and rare |
| chr12 | E | 12q24.1 | 5 | 110000000 | 6335 | fs   | fs   | fs common and rare |
| chr12 | E | 12q24.1 | 5 | 110000000 | 5472 | fs   | fs   | fs common and rare |
| chr12 | E | 12q24.1 | 5 | 110000000 | 2980 | fs   | fs   | fs common and rare |
| chr12 | E | 12q24.1 | 5 | 111000000 | 6993 | fs   | fs   | fs common and rare |
| chr12 | E | 12q24.1 | 5 | 111000000 | 5015 | fs   | fs   | fs common and rare |
| chr12 | E | 12q24.1 | 5 | 111000000 | 5293 | fs   | fs   | fs common and rare |
| chr12 | E | 12q24.1 | 5 | 111000000 | 7373 | fs   | fs   | fs common and rare |
| chr12 | E | 12q24.1 | 5 | 112000000 | 3629 | fs   | fs   | fs common and rare |
| chr12 | E | 12q24.1 | 5 | 112000000 | 4306 | fs   | fs   | fs common and rare |
| chr12 | E | 12q24.1 | 5 | 112000000 | 4189 | fs   | fs   | fs common and rare |
| chr12 | E | 12q24.1 | 5 | 112000000 | 8996 | fs   | fs   | fs common and rare |
| chr12 | E | 12q24.1 | 5 | 113000000 | 5403 | fs   | fs   | fs common and rare |
| chr12 | E | 12q24.1 | 5 | 113000000 | 5473 | fs   | fs   | fs common and rare |
| chr12 | B | 12q24.2 | . | 113000000 | 3235 | fs   | fs   | fs common and rare |
| chr12 | B | 12q24.2 | . | 113000000 | 6182 | fs   | fs   | fs common and rare |
| chr12 | B | 12q24.2 | . | 114000000 | 7220 | fs   | fs   | fs common and rare |
| chr12 | B | 12q24.2 | . | 114000000 | 3056 | fs   | fs   | fs common and rare |
| chr12 | B | 12q24.2 | . | 114000000 | 4573 | fs   | fs   | fs common and rare |
| chr12 | B | 12q24.2 | . | 114000000 | 3032 | fs   | fs   | fs common and rare |
| chr12 | B | 12q24.2 | . | 115000000 | 3254 | fs   | fs   | fs common and rare |
| chr12 | B | 12q24.2 | . | 115000000 | 2515 | fs   | fs   | fs common and rare |
| chr12 | B | 12q24.2 | . | 115000000 | 2876 | fs   | fs   | fs common and rare |
| chr12 | B | 12q24.2 | . | 115000000 | 5124 | fs   | fs   | fs common and rare |
| chr12 | B | 12q24.2 | . | 116000000 | 5113 | fs   | fs   | fs common and rare |
| chr12 | B | 12q24.2 | . | 116000000 | 2089 | fs   | fs   | fs common and rare |
| chr12 | B | 12q24.2 | . | 116000000 | 7010 | fs   | fs   | fs common and rare |

|       |   |          |   |           |       |    |                    |
|-------|---|----------|---|-----------|-------|----|--------------------|
| chr12 | B | 12q24.2  | . | 116000000 | 5656  | fs | fs common and rare |
| chr12 | B | 12q24.2  | . | 117000000 | 6737  | fs | fs common and rare |
| chr12 | B | 12q24.2  | . | 117000000 | 4830  | fs | fs common and rare |
| chr12 | B | 12q24.2  | . | 117000000 | 5263  | fs | fs common and rare |
| chr12 | B | 12q24.2  | . | 117000000 | 4252  | fs | fs common and rare |
| chr12 | B | 12q24.2  | . | 118000000 | 4926  | fs | fs common and rare |
| chr12 | B | 12q24.2  | . | 118000000 | 2920  | fs | fs common and rare |
| chr12 | B | 12q24.2  | . | 118000000 | 4518  | fs | fs common and rare |
| chr12 | B | 12q24.2  | . | 118000000 | 5293  | fs | fs common and rare |
| chr12 | B | 12q24.2  | . | 119000000 | 3039  | fs | fs common and rare |
| chr12 | B | 12q24.2  | . | 119000000 | 4965  | fs | fs common and rare |
| chr12 | B | 12q24.2  | . | 119000000 | 6326  | fs | fs common and rare |
| chr12 | E | 12q24.31 | 3 | 119000000 | 5589  | fs | fs common          |
| chr12 | E | 12q24.31 | 3 | 120000000 | 3685  | fs | fs common          |
| chr12 | E | 12q24.31 | 3 | 120000000 | 9909  | fs | fs common          |
| chr12 | E | 12q24.31 | 3 | 120000000 | 4450  | fs | fs common          |
| chr12 | E | 12q24.31 | 3 | 120000000 | 5722  | fs | fs common          |
| chr12 | E | 12q24.31 | 3 | 121000000 | 7658  | fs | fs common          |
| chr12 | E | 12q24.31 | 3 | 121000000 | 6060  | fs | fs common          |
| chr12 | E | 12q24.31 | 3 | 121000000 | 3824  | fs | fs common          |
| chr12 | E | 12q24.31 | 3 | 121000000 | 4260  | fs | fs common          |
| chr12 | E | 12q24.31 | 3 | 122000000 | 5683  | fs | fs common          |
| chr12 | E | 12q24.31 | 3 | 122000000 | 4978  | fs | fs common          |
| chr12 | E | 12q24.31 | 3 | 122000000 | 2195  | fs | fs common          |
| chr12 | E | 12q24.31 | 3 | 122000000 | 7545  | fs | fs common          |
| chr12 | E | 12q24.31 | 3 | 123000000 | 6653  | fs | fs common          |
| chr12 | E | 12q24.31 | 3 | 123000000 | 5803  | fs | fs common          |
| chr12 | E | 12q24.31 | 3 | 123000000 | 5429  | fs | fs common          |
| chr12 | E | 12q24.31 | 3 | 123000000 | 12654 | fs | fs common          |
| chr12 | E | 12q24.31 | 3 | 124000000 | 7374  | fs | fs common          |
| chr12 | E | 12q24.31 | 3 | 124000000 | 6701  | fs | fs common          |
| chr12 | E | 12q24.31 | 3 | 124000000 | 7612  | fs | fs common          |
| chr12 | E | 12q24.31 | 3 | 124000000 | 4433  | fs | fs common          |
| chr12 | E | 12q24.31 | 3 | 125000000 | 6957  | fs | fs common          |
| chr12 | E | 12q24.31 | 3 | 125000000 | 3722  | fs | fs common          |
| chr12 | E | 12q24.31 | 3 | 125000000 | 3573  | fs | fs common          |

|       |   |          |   |           |       |      |           |
|-------|---|----------|---|-----------|-------|------|-----------|
| chr12 | E | 12q24.31 | 3 | 125000000 | 4522  | fs   | fs common |
| chr12 | B | 12q24.32 | . | 126000000 | 5793  | fs   | fs common |
| chr12 | B | 12q24.32 | . | 126000000 | 5108  | fs   | fs common |
| chr12 | B | 12q24.32 | . | 126000000 | 5641  | fs   | fs common |
| chr12 | B | 12q24.32 | . | 126000000 | 5640  | fs   | fs common |
| chr12 | B | 12q24.32 | . | 127000000 | 6882  | fs   | fs common |
| chr12 | B | 12q24.32 | . | 127000000 | 3307  | fs   | fs common |
| chr12 | B | 12q24.32 | . | 127000000 | 10533 | fs   | fs common |
| chr12 | B | 12q24.32 | . | 127000000 | 6703  | fs   | fs common |
| chr12 | B | 12q24.32 | . | 128000000 | 12591 | fs   | fs common |
| chr12 | B | 12q24.32 | . | 128000000 | 8075  | fs   | fs common |
| chr12 | B | 12q24.32 | . | 128000000 | 10217 | fs   | fs common |
| chr12 | B | 12q24.32 | . | 128000000 | 9407  | fs   | fs common |
| chr12 | B | 12q24.33 | . | 129000000 | 6337  | fs   | fs common |
| chr12 | B | 12q24.33 | . | 129000000 | 9706  | fs   | fs common |
| chr12 | B | 12q24.33 | . | 129000000 | 8387  | fs   | fs common |
| chr12 | T | 12q24.33 | . | 129000000 | 11494 | fs   | fs common |
| chr12 | T | 12q24.33 | . | 130000000 | 11108 | fs   | fs common |
| chr12 | T | 12q24.33 | . | 130000000 | 12687 | fs   | fs common |
| chr12 | T | 12q24.33 | . | 130000000 | 15267 | fs   | fs common |
| chr12 | T | 12q24.33 | . | 130000000 | 21202 | fs   | fs common |
| chr12 | T | 12q24.33 | . | 131000000 | 10301 | fs   | fs common |
| chr12 | T | 12q24.33 | . | 131000000 | 16140 | fs   | fs common |
| chr12 | T | 12q24.33 | . | 131000000 | 12218 | fs   | fs common |
| chr12 | T | 12q24.33 | . | 131000000 | 38463 | fs   | fs common |
| chr12 | T | 12q24.33 | . | 132000000 | 41097 | fs   | fs common |
| chr12 | T | 12q24.33 | . | 132000000 | 25187 | fs   | fs common |
| chr12 | T | 12q24.33 | . | 132000000 | 18340 | fs   | fs common |
| chr13 | C | 13p13    | . | 125000    | 0     | nofs | nofs      |
| chr13 | C | 13p13    | . | 375000    | 0     | nofs | nofs      |
| chr13 | C | 13p13    | . | 625000    | 0     | nofs | nofs      |
| chr13 | C | 13p13    | . | 875000    | 0     | nofs | nofs      |
| chr13 | C | 13p13    | . | 1125000   | 0     | nofs | nofs      |
| chr13 | C | 13p13    | . | 1375000   | 0     | nofs | nofs      |
| chr13 | C | 13p13    | . | 1625000   | 0     | nofs | nofs      |
| chr13 | C | 13p13    | . | 1875000   | 0     | nofs | nofs      |

|       |   |       |   |          |   |      |      |
|-------|---|-------|---|----------|---|------|------|
| chr13 | C | 13p13 | . | 2125000  | 0 | nofs | nofs |
| chr13 | C | 13p13 | . | 2375000  | 0 | nofs | nofs |
| chr13 | C | 13p13 | . | 2625000  | 0 | nofs | nofs |
| chr13 | C | 13p13 | . | 2875000  | 0 | nofs | nofs |
| chr13 | C | 13p13 | . | 3125000  | 0 | nofs | nofs |
| chr13 | C | 13p13 | . | 3375000  | 0 | nofs | nofs |
| chr13 | C | 13p13 | . | 3625000  | 0 | nofs | nofs |
| chr13 | C | 13p13 | . | 3875000  | 0 | nofs | nofs |
| chr13 | C | 13p12 | . | 4125000  | 0 | nofs | nofs |
| chr13 | C | 13p12 | . | 4375000  | 0 | nofs | nofs |
| chr13 | C | 13p12 | . | 4625000  | 0 | nofs | nofs |
| chr13 | C | 13p12 | . | 4875000  | 0 | nofs | nofs |
| chr13 | C | 13p12 | . | 5125000  | 0 | nofs | nofs |
| chr13 | C | 13p12 | . | 5375000  | 0 | nofs | nofs |
| chr13 | C | 13p12 | . | 5625000  | 0 | nofs | nofs |
| chr13 | C | 13p12 | . | 5875000  | 0 | nofs | nofs |
| chr13 | C | 13p12 | . | 6125000  | 0 | nofs | nofs |
| chr13 | C | 13p12 | . | 6375000  | 0 | nofs | nofs |
| chr13 | C | 13p12 | . | 6625000  | 0 | nofs | nofs |
| chr13 | C | 13p12 | . | 6875000  | 0 | nofs | nofs |
| chr13 | C | 13p12 | . | 7125000  | 0 | nofs | nofs |
| chr13 | C | 13p12 | . | 7375000  | 0 | nofs | nofs |
| chr13 | C | 13p12 | . | 7625000  | 0 | nofs | nofs |
| chr13 | C | 13p12 | . | 7875000  | 0 | nofs | nofs |
| chr13 | C | 13p12 | . | 8125000  | 0 | nofs | nofs |
| chr13 | C | 13p12 | . | 8375000  | 0 | nofs | nofs |
| chr13 | C | 13p13 | . | 8625000  | 0 | nofs | nofs |
| chr13 | C | 13p11 | . | 8875000  | 0 | nofs | nofs |
| chr13 | C | 13p11 | . | 9125000  | 0 | nofs | nofs |
| chr13 | C | 13p11 | . | 9375000  | 0 | nofs | nofs |
| chr13 | C | 13p11 | . | 9625000  | 0 | nofs | nofs |
| chr13 | C | 13p11 | . | 9875000  | 0 | nofs | nofs |
| chr13 | C | 13p11 | . | 10125000 | 0 | nofs | nofs |
| chr13 | C | 13p11 | . | 10375000 | 0 | nofs | nofs |
| chr13 | C | 13p11 | . | 10625000 | 0 | nofs | nofs |
| chr13 | C | 13p11 | . | 10875000 | 0 | nofs | nofs |



|       |   |         |   |          |       |      |      |
|-------|---|---------|---|----------|-------|------|------|
| chr13 | C | 13p11   | . | 11125000 | 0     | nofs | nofs |
| chr13 | C | 13p11   | . | 11375000 | 0     | nofs | nofs |
| chr13 | C | 13p11   | . | 11625000 | 0     | nofs | nofs |
| chr13 | C | 13p11   | . | 11875000 | 0     | nofs | nofs |
| chr13 | C | 13p11   | . | 12125000 | 0     | nofs | nofs |
| chr13 | C | 13p11   | . | 12375000 | 0     | nofs | nofs |
| chr13 | C | 13p11   | . | 12625000 | 0     | nofs | nofs |
| chr13 | C | 13p11   | . | 12875000 | 0     | nofs | nofs |
| chr13 | C | 13p11   | . | 13125000 | 0     | nofs | nofs |
| chr13 | C | 13p11   | . | 13375000 | 0     | nofs | nofs |
| chr13 | C | 13p11   | . | 13625000 | 0     | nofs | nofs |
| chr13 | C | 13p11   | . | 13875000 | 0     | nofs | nofs |
| chr13 | C | 13p11   | . | 14125000 | 0     | nofs | nofs |
| chr13 | C | 13p11   | . | 14375000 | 0     | nofs | nofs |
| chr13 | C | 13p11   | . | 14625000 | 0     | nofs | nofs |
| chr13 | C | 13p11   | . | 14875000 | 0     | nofs | nofs |
| chr13 | C | 13p11   | . | 15125000 | 0     | nofs | nofs |
| chr13 | C | 13p11   | . | 15375000 | 0     | nofs | nofs |
| chr13 | C | 13p11   | . | 15625000 | 0     | nofs | nofs |
| chr13 | C | 13p11   | . | 15875000 | 0     | nofs | nofs |
| chr13 | C | 13p11   | . | 16125000 | 0     | nofs | nofs |
| chr13 | C | 13p11   | . | 16375000 | 0     | nofs | nofs |
| chr13 | C | 13p11   | . | 16625000 | 0     | nofs | nofs |
| chr13 | C | 13p11   | . | 16875000 | 0     | nofs | nofs |
| chr13 | C | 13p11   | . | 17125000 | 0     | nofs | nofs |
| chr13 | C | 13p11   | . | 17375000 | 0     | nofs | nofs |
| chr13 | C | 13p11   | . | 17625000 | 0     | nofs | nofs |
| chr13 | C | 13q11   | . | 17875000 | 12608 | nofs | nofs |
| chr13 | C | 13q11   | . | 18125000 | 3495  | nofs | nofs |
| chr13 | C | 13q12.1 | 3 | 18375000 | 7832  | nofs | nofs |
| chr13 | C | 13q12.1 | 3 | 18625000 | 5807  | nofs | nofs |
| chr13 | C | 13q12.1 | 3 | 18875000 | 2151  | nofs | nofs |
| chr13 | C | 13q12.1 | 3 | 19125000 | 2404  | nofs | nofs |
| chr13 | C | 13q12.1 | 3 | 19375000 | 5815  | nofs | nofs |
| chr13 | C | 13q12.1 | 3 | 19625000 | 2772  | nofs | nofs |
| chr13 | C | 13q12.1 | 3 | 19875000 | 6956  | nofs | nofs |

|       |   |         |   |          |      |      |      |
|-------|---|---------|---|----------|------|------|------|
| chr13 | C | 13q12.1 | 3 | 20125000 | 4047 | nofs | nofs |
| chr13 | C | 13q12.1 | 3 | 20375000 | 6047 | nofs | nofs |
| chr13 | C | 13q12.1 | 3 | 20625000 | 5245 | nofs | nofs |
| chr13 | C | 13q12.1 | 3 | 20875000 | 4899 | nofs | nofs |
| chr13 | E | 13q12.1 | 3 | 21125000 | 1758 | nofs | nofs |
| chr13 | E | 13q12.1 | 3 | 21375000 | 8056 | nofs | nofs |
| chr13 | E | 13q12.1 | 3 | 21625000 | 1951 | nofs | nofs |
| chr13 | E | 13q12.1 | 3 | 21875000 | 1782 | nofs | nofs |
| chr13 | E | 13q12.1 | 3 | 22125000 | 3794 | nofs | nofs |
| chr13 | E | 13q12.1 | 3 | 22375000 | 4708 | nofs | nofs |
| chr13 | E | 13q12.1 | 3 | 22625000 | 5486 | nofs | nofs |
| chr13 | E | 13q12.1 | 3 | 22875000 | 4816 | nofs | nofs |
| chr13 | E | 13q12.1 | 3 | 23125000 | 3582 | nofs | nofs |
| chr13 | E | 13q12.1 | 3 | 23375000 | 2354 | nofs | nofs |
| chr13 | E | 13q12.1 | 3 | 23625000 | 2153 | nofs | nofs |
| chr13 | E | 13q12.1 | 3 | 23875000 | 7279 | nofs | nofs |
| chr13 | E | 13q12.1 | 3 | 24125000 | 4026 | nofs | nofs |
| chr13 | E | 13q12.1 | 3 | 24375000 | 3213 | nofs | nofs |
| chr13 | E | 13q12.1 | 3 | 24625000 | 3144 | nofs | nofs |
| chr13 | E | 13q12.1 | 3 | 24875000 | 4355 | nofs | nofs |
| chr13 | E | 13q12.1 | 3 | 25125000 | 2049 | nofs | nofs |
| chr13 | E | 13q12.1 | 3 | 25375000 | 2370 | nofs | nofs |
| chr13 | E | 13q12.1 | 3 | 25625000 | 2057 | nofs | nofs |
| chr13 | E | 13q12.1 | 3 | 25875000 | 2738 | nofs | nofs |
| chr13 | E | 13q12.1 | 3 | 26125000 | 2157 | nofs | nofs |
| chr13 | E | 13q12.1 | 3 | 26375000 | 3750 | nofs | nofs |
| chr13 | E | 13q12.1 | 3 | 26625000 | 4078 | nofs | nofs |
| chr13 | B | 13q12.2 | . | 26875000 | 5091 | nofs | nofs |
| chr13 | B | 13q12.2 | . | 27125000 | 2590 | nofs | nofs |
| chr13 | B | 13q12.2 | . | 27375000 | 5152 | nofs | nofs |
| chr13 | B | 13q12.2 | . | 27625000 | 2850 | nofs | nofs |
| chr13 | B | 13q12.2 | . | 27875000 | 2754 | nofs | nofs |
| chr13 | B | 13q12.3 | . | 28125000 | 2275 | nofs | nofs |
| chr13 | B | 13q12.3 | . | 28375000 | 2512 | nofs | nofs |
| chr13 | B | 13q12.3 | . | 28625000 | 1393 | nofs | nofs |
| chr13 | B | 13q12.3 | . | 28875000 | 3694 | nofs | nofs |

|       |   |         |   |          |      |      |                    |
|-------|---|---------|---|----------|------|------|--------------------|
| chr13 | B | 13q12.3 | . | 29125000 | 3779 | nofs | nofs               |
| chr13 | B | 13q12.3 | . | 29375000 | 2906 | nofs | nofs               |
| chr13 | B | 13q12.3 | . | 29625000 | 2463 | nofs | nofs               |
| chr13 | B | 13q12.3 | . | 29875000 | 3131 | nofs | nofs               |
| chr13 | B | 13q12.3 | . | 30125000 | 2786 | nofs | nofs               |
| chr13 | B | 13q12.3 | . | 30375000 | 6235 | nofs | nofs               |
| chr13 | B | 13q12.3 | . | 30625000 | 3191 | nofs | nofs               |
| chr13 | B | 13q12.3 | . | 30875000 | 2942 | nofs | nofs               |
| chr13 | E | 13q13   | 2 | 31125000 | 2817 | nofs | nofs               |
| chr13 | E | 13q13   | 2 | 31375000 | 2619 | nofs | nofs               |
| chr13 | E | 13q13   | 2 | 31625000 | 2182 | nofs | nofs               |
| chr13 | E | 13q13   | 2 | 31875000 | 1787 | nofs | nofs               |
| chr13 | E | 13q13   | 2 | 32125000 | 4199 | nofs | nofs               |
| chr13 | E | 13q13   | 2 | 32375000 | 2793 | nofs | nofs               |
| chr13 | E | 13q13   | 2 | 32625000 | 2481 | nofs | nofs               |
| chr13 | E | 13q13   | 2 | 32875000 | 2595 | fs   | fs common and rare |
| chr13 | E | 13q13   | 2 | 33125000 | 2950 | fs   | fs common and rare |
| chr13 | E | 13q13   | 2 | 33375000 | 2628 | fs   | fs common and rare |
| chr13 | E | 13q13   | 2 | 33625000 | 2519 | fs   | fs common and rare |
| chr13 | E | 13q13   | 2 | 33875000 | 2839 | fs   | fs common and rare |
| chr13 | E | 13q13   | 2 | 34125000 | 3718 | fs   | fs common and rare |
| chr13 | E | 13q13   | 2 | 34375000 | 3093 | fs   | fs common and rare |
| chr13 | E | 13q13   | 2 | 34625000 | 2119 | fs   | fs common and rare |
| chr13 | E | 13q13   | 2 | 34875000 | 1816 | nofs | nofs               |
| chr13 | E | 13q13   | 2 | 35125000 | 4995 | nofs | nofs               |
| chr13 | E | 13q13   | 2 | 35375000 | 2450 | nofs | nofs               |
| chr13 | E | 13q13   | 2 | 35625000 | 1173 | nofs | nofs               |
| chr13 | E | 13q13   | 2 | 35875000 | 3257 | nofs | nofs               |
| chr13 | E | 13q13   | 2 | 36125000 | 1560 | nofs | nofs               |
| chr13 | E | 13q13   | 2 | 36375000 | 1391 | nofs | nofs               |
| chr13 | E | 13q13   | 2 | 36625000 | 1951 | nofs | nofs               |
| chr13 | E | 13q13   | 2 | 36875000 | 2962 | nofs | nofs               |
| chr13 | E | 13q13   | 2 | 37125000 | 1758 | nofs | nofs               |
| chr13 | E | 13q13   | 2 | 37375000 | 2138 | nofs | nofs               |
| chr13 | E | 13q13   | 2 | 37625000 | 2844 | nofs | nofs               |
| chr13 | E | 13q13   | 2 | 37875000 | 2120 | nofs | nofs               |

|       |   |         |   |          |       |      |      |
|-------|---|---------|---|----------|-------|------|------|
| chr13 | E | 13q13   | 2 | 38125000 | 3144  | nofs | nofs |
| chr13 | E | 13q13   | 2 | 38375000 | 3088  | nofs | nofs |
| chr13 | E | 13q13   | 2 | 38625000 | 2035  | nofs | nofs |
| chr13 | E | 13q13   | 2 | 38875000 | 3175  | nofs | nofs |
| chr13 | E | 13q13   | 2 | 39125000 | 2065  | nofs | nofs |
| chr13 | E | 13q14.1 | 5 | 39375000 | 2206  | nofs | nofs |
| chr13 | E | 13q14.1 | 5 | 39625000 | 2598  | nofs | nofs |
| chr13 | E | 13q14.1 | 5 | 39875000 | 2866  | nofs | nofs |
| chr13 | E | 13q14.1 | 5 | 40125000 | 2655  | nofs | nofs |
| chr13 | E | 13q14.1 | 5 | 40375000 | 4191  | nofs | nofs |
| chr13 | E | 13q14.1 | 5 | 40625000 | 2189  | nofs | nofs |
| chr13 | E | 13q14.1 | 5 | 40875000 | 11366 | nofs | nofs |
| chr13 | E | 13q14.1 | 5 | 41125000 | 2630  | nofs | nofs |
| chr13 | E | 13q14.1 | 5 | 41375000 | 3715  | nofs | nofs |
| chr13 | E | 13q14.1 | 5 | 41625000 | 3103  | nofs | nofs |
| chr13 | E | 13q14.1 | 5 | 41875000 | 2063  | nofs | nofs |
| chr13 | E | 13q14.1 | 5 | 42125000 | 2167  | nofs | nofs |
| chr13 | E | 13q14.1 | 5 | 42375000 | 2430  | nofs | nofs |
| chr13 | E | 13q14.1 | 5 | 42625000 | 898   | nofs | nofs |
| chr13 | E | 13q14.1 | 5 | 42875000 | 2561  | nofs | nofs |
| chr13 | E | 13q14.1 | 5 | 43125000 | 1842  | nofs | nofs |
| chr13 | E | 13q14.1 | 5 | 43375000 | 2012  | nofs | nofs |
| chr13 | E | 13q14.1 | 5 | 43625000 | 2610  | nofs | nofs |
| chr13 | E | 13q14.1 | 5 | 43875000 | 2480  | nofs | nofs |
| chr13 | E | 13q14.1 | 5 | 44125000 | 3610  | nofs | nofs |
| chr13 | E | 13q14.1 | 5 | 44375000 | 2427  | nofs | nofs |
| chr13 | E | 13q14.1 | 5 | 44625000 | 3363  | nofs | nofs |
| chr13 | E | 13q14.1 | 5 | 44875000 | 10770 | nofs | nofs |
| chr13 | E | 13q14.1 | 5 | 45125000 | 2021  | nofs | nofs |
| chr13 | E | 13q14.1 | 5 | 45375000 | 2602  | nofs | nofs |
| chr13 | E | 13q14.1 | 5 | 45625000 | 2230  | nofs | nofs |
| chr13 | E | 13q14.1 | 5 | 45875000 | 4782  | nofs | nofs |
| chr13 | E | 13q14.1 | 5 | 46125000 | 2648  | nofs | nofs |
| chr13 | E | 13q14.2 | 2 | 46375000 | 1336  | nofs | nofs |
| chr13 | E | 13q14.2 | 2 | 46625000 | 3087  | nofs | nofs |
| chr13 | E | 13q14.2 | 2 | 46875000 | 1550  | nofs | nofs |

|       |   |         |   |          |      |      |           |
|-------|---|---------|---|----------|------|------|-----------|
| chr13 | E | 13q14.2 | 2 | 47125000 | 1120 | nofs | nofs      |
| chr13 | E | 13q14.2 | 2 | 47375000 | 1779 | nofs | nofs      |
| chr13 | E | 13q14.2 | 2 | 47625000 | 2046 | nofs | nofs      |
| chr13 | E | 13q14.2 | 2 | 47875000 | 3000 | nofs | nofs      |
| chr13 | E | 13q14.2 | 2 | 48125000 | 2139 | nofs | nofs      |
| chr13 | E | 13q14.2 | 2 | 48375000 | 2526 | nofs | nofs      |
| chr13 | E | 13q14.2 | 2 | 48625000 | 2067 | nofs | nofs      |
| chr13 | E | 13q14.2 | 2 | 48875000 | 4141 | nofs | nofs      |
| chr13 | E | 13q14.2 | 2 | 49125000 | 5317 | nofs | nofs      |
| chr13 | E | 13q14.2 | 2 | 49375000 | 5258 | nofs | nofs      |
| chr13 | E | 13q14.2 | 2 | 49625000 | 2411 | nofs | nofs      |
| chr13 | E | 13q14.2 | 2 | 49875000 | 1673 | nofs | nofs      |
| chr13 | E | 13q14.3 | 4 | 50125000 | 1905 | nofs | nofs      |
| chr13 | E | 13q14.3 | 4 | 50375000 | 1664 | nofs | nofs      |
| chr13 | E | 13q14.3 | 4 | 50625000 | 2886 | nofs | nofs      |
| chr13 | E | 13q14.3 | 4 | 50875000 | 2204 | nofs | nofs      |
| chr13 | E | 13q14.3 | 4 | 51125000 | 3286 | nofs | nofs      |
| chr13 | E | 13q14.3 | 4 | 51375000 | 1916 | nofs | nofs      |
| chr13 | E | 13q14.3 | 4 | 51625000 | 3306 | nofs | nofs      |
| chr13 | E | 13q14.3 | 4 | 51875000 | 2598 | nofs | nofs      |
| chr13 | E | 13q14.3 | 4 | 52125000 | 2294 | nofs | nofs      |
| chr13 | E | 13q14.3 | 4 | 52375000 | 2736 | nofs | nofs      |
| chr13 | E | 13q14.3 | 4 | 52625000 | 1708 | nofs | nofs      |
| chr13 | E | 13q14.3 | 4 | 52875000 | 3106 | nofs | nofs      |
| chr13 | E | 13q14.3 | 4 | 53125000 | 1626 | nofs | nofs      |
| chr13 | E | 13q14.3 | 4 | 53375000 | 2418 | nofs | nofs      |
| chr13 | E | 13q14.3 | 4 | 53625000 | 1579 | nofs | nofs      |
| chr13 | E | 13q14.3 | 4 | 53875000 | 3536 | nofs | nofs      |
| chr13 | E | 13q14.3 | 4 | 54125000 | 2057 | nofs | nofs      |
| chr13 | E | 13q14.3 | 4 | 54375000 | 3302 | nofs | nofs      |
| chr13 | B | 13q21   | . | 54625000 | 2803 | fs   | fs common |
| chr13 | B | 13q21   | . | 54875000 | 2800 | fs   | fs common |
| chr13 | B | 13q21   | . | 55125000 | 2547 | fs   | fs common |
| chr13 | B | 13q21   | . | 55375000 | 2152 | fs   | fs common |
| chr13 | B | 13q21   | . | 55625000 | 2936 | fs   | fs common |
| chr13 | B | 13q21   | . | 55875000 | 2185 | fs   | fs common |

|       |   |       |   |          |       |    |           |
|-------|---|-------|---|----------|-------|----|-----------|
| chr13 | B | 13q21 | . | 56125000 | 3277  | fs | fs common |
| chr13 | B | 13q21 | . | 56375000 | 2069  | fs | fs common |
| chr13 | B | 13q21 | . | 56625000 | 2536  | fs | fs common |
| chr13 | B | 13q21 | . | 56875000 | 2993  | fs | fs common |
| chr13 | B | 13q21 | . | 57125000 | 2608  | fs | fs common |
| chr13 | B | 13q21 | . | 57375000 | 3114  | fs | fs common |
| chr13 | B | 13q21 | . | 57625000 | 2317  | fs | fs common |
| chr13 | B | 13q21 | . | 57875000 | 2715  | fs | fs common |
| chr13 | B | 13q21 | . | 58125000 | 3627  | fs | fs common |
| chr13 | B | 13q21 | . | 58375000 | 3234  | fs | fs common |
| chr13 | B | 13q21 | . | 58625000 | 1689  | fs | fs common |
| chr13 | B | 13q21 | . | 58875000 | 2693  | fs | fs common |
| chr13 | B | 13q21 | . | 59125000 | 1714  | fs | fs common |
| chr13 | B | 13q21 | . | 59375000 | 1412  | fs | fs common |
| chr13 | B | 13q21 | . | 59625000 | 2381  | fs | fs common |
| chr13 | B | 13q21 | . | 59875000 | 2178  | fs | fs common |
| chr13 | B | 13q21 | . | 60125000 | 1791  | fs | fs common |
| chr13 | B | 13q21 | . | 60375000 | 2906  | fs | fs common |
| chr13 | B | 13q21 | . | 60625000 | 13353 | fs | fs common |
| chr13 | B | 13q21 | . | 60875000 | 2294  | fs | fs common |
| chr13 | B | 13q21 | . | 61125000 | 2572  | fs | fs common |
| chr13 | B | 13q21 | . | 61375000 | 6929  | fs | fs common |
| chr13 | B | 13q21 | . | 61625000 | 3744  | fs | fs common |
| chr13 | B | 13q21 | . | 61875000 | 2897  | fs | fs common |
| chr13 | B | 13q21 | . | 62125000 | 3160  | fs | fs common |
| chr13 | B | 13q21 | . | 62375000 | 2395  | fs | fs common |
| chr13 | B | 13q21 | . | 62625000 | 3496  | fs | fs common |
| chr13 | B | 13q21 | . | 62875000 | 3865  | fs | fs common |
| chr13 | B | 13q21 | . | 63125000 | 6715  | fs | fs common |
| chr13 | B | 13q21 | . | 63375000 | 6086  | fs | fs common |
| chr13 | B | 13q21 | . | 63625000 | 2694  | fs | fs common |
| chr13 | B | 13q21 | . | 63875000 | 2849  | fs | fs common |
| chr13 | B | 13q21 | . | 64125000 | 2108  | fs | fs common |
| chr13 | B | 13q21 | . | 64375000 | 2088  | fs | fs common |
| chr13 | B | 13q21 | . | 64625000 | 1876  | fs | fs common |
| chr13 | B | 13q21 | . | 64875000 | 3922  | fs | fs common |

|       |   |       |   |          |      |      |           |
|-------|---|-------|---|----------|------|------|-----------|
| chr13 | B | 13q21 | . | 65125000 | 1786 | fs   | fs common |
| chr13 | B | 13q21 | . | 65375000 | 2712 | fs   | fs common |
| chr13 | B | 13q21 | . | 65625000 | 2467 | fs   | fs common |
| chr13 | B | 13q21 | . | 65875000 | 2229 | fs   | fs common |
| chr13 | B | 13q21 | . | 66125000 | 2338 | fs   | fs common |
| chr13 | B | 13q21 | . | 66375000 | 2102 | fs   | fs common |
| chr13 | B | 13q21 | . | 66625000 | 2390 | fs   | fs common |
| chr13 | B | 13q21 | . | 66875000 | 1641 | fs   | fs common |
| chr13 | B | 13q21 | . | 67125000 | 4298 | fs   | fs common |
| chr13 | B | 13q21 | . | 67375000 | 3223 | fs   | fs common |
| chr13 | B | 13q21 | . | 67625000 | 2668 | fs   | fs common |
| chr13 | B | 13q21 | . | 67875000 | 1713 | fs   | fs common |
| chr13 | B | 13q21 | . | 68125000 | 2525 | fs   | fs common |
| chr13 | B | 13q21 | . | 68375000 | 2408 | fs   | fs common |
| chr13 | B | 13q21 | . | 68625000 | 2683 | fs   | fs common |
| chr13 | B | 13q21 | . | 68875000 | 995  | fs   | fs common |
| chr13 | B | 13q21 | . | 69125000 | 2338 | fs   | fs common |
| chr13 | B | 13q21 | . | 69375000 | 2458 | fs   | fs common |
| chr13 | B | 13q21 | . | 69625000 | 2356 | fs   | fs common |
| chr13 | B | 13q21 | . | 69875000 | 2191 | fs   | fs common |
| chr13 | B | 13q21 | . | 70125000 | 3065 | fs   | fs common |
| chr13 | B | 13q21 | . | 70375000 | 1953 | fs   | fs common |
| chr13 | B | 13q21 | . | 70625000 | 2892 | fs   | fs common |
| chr13 | B | 13q21 | . | 70875000 | 2531 | fs   | fs common |
| chr13 | B | 13q21 | . | 71125000 | 4332 | fs   | fs common |
| chr13 | B | 13q21 | . | 71375000 | 3259 | fs   | fs common |
| chr13 | B | 13q21 | . | 71625000 | 1087 | fs   | fs common |
| chr13 | B | 13q21 | . | 71875000 | 1307 | fs   | fs common |
| chr13 | B | 13q21 | . | 72125000 | 2013 | fs   | fs common |
| chr13 | B | 13q22 | . | 72375000 | 3003 | nofs | nofs      |
| chr13 | B | 13q22 | . | 72625000 | 4780 | nofs | nofs      |
| chr13 | B | 13q22 | . | 72875000 | 1713 | nofs | nofs      |
| chr13 | B | 13q22 | . | 73125000 | 2953 | nofs | nofs      |
| chr13 | B | 13q22 | . | 73375000 | 1856 | nofs | nofs      |
| chr13 | B | 13q22 | . | 73625000 | 1726 | nofs | nofs      |
| chr13 | B | 13q22 | . | 73875000 | 1525 | nofs | nofs      |

|       |   |       |   |          |      |      |      |
|-------|---|-------|---|----------|------|------|------|
| chr13 | B | 13q22 | . | 74125000 | 2308 | nofs | nofs |
| chr13 | B | 13q22 | . | 74375000 | 3258 | nofs | nofs |
| chr13 | B | 13q22 | . | 74625000 | 1420 | nofs | nofs |
| chr13 | B | 13q22 | . | 74875000 | 2387 | nofs | nofs |
| chr13 | B | 13q22 | . | 75125000 | 2029 | nofs | nofs |
| chr13 | B | 13q22 | . | 75375000 | 1437 | nofs | nofs |
| chr13 | B | 13q22 | . | 75625000 | 2651 | nofs | nofs |
| chr13 | B | 13q22 | . | 75875000 | 4382 | nofs | nofs |
| chr13 | B | 13q22 | . | 76125000 | 1607 | nofs | nofs |
| chr13 | B | 13q22 | . | 76375000 | 2346 | nofs | nofs |
| chr13 | B | 13q22 | . | 76625000 | 2450 | nofs | nofs |
| chr13 | B | 13q22 | . | 76875000 | 2897 | nofs | nofs |
| chr13 | B | 13q22 | . | 77125000 | 4143 | nofs | nofs |
| chr13 | B | 13q22 | . | 77375000 | 2431 | nofs | nofs |
| chr13 | B | 13q22 | . | 77625000 | 2293 | nofs | nofs |
| chr13 | E | 13q31 | 1 | 77875000 | 2253 | nofs | nofs |
| chr13 | E | 13q31 | 1 | 78125000 | 2629 | nofs | nofs |
| chr13 | E | 13q31 | 1 | 78375000 | 903  | nofs | nofs |
| chr13 | E | 13q31 | 1 | 78625000 | 2379 | nofs | nofs |
| chr13 | E | 13q31 | 1 | 78875000 | 3331 | nofs | nofs |
| chr13 | E | 13q31 | 1 | 79125000 | 1616 | nofs | nofs |
| chr13 | E | 13q31 | 1 | 79375000 | 1854 | nofs | nofs |
| chr13 | E | 13q31 | 1 | 79625000 | 3062 | nofs | nofs |
| chr13 | E | 13q31 | 1 | 79875000 | 4292 | nofs | nofs |
| chr13 | E | 13q31 | 1 | 80125000 | 5236 | nofs | nofs |
| chr13 | E | 13q31 | 1 | 80375000 | 2089 | nofs | nofs |
| chr13 | E | 13q31 | 1 | 80625000 | 2015 | nofs | nofs |
| chr13 | E | 13q31 | 1 | 80875000 | 2380 | nofs | nofs |
| chr13 | E | 13q31 | 1 | 81125000 | 2002 | nofs | nofs |
| chr13 | E | 13q31 | 1 | 81375000 | 2397 | nofs | nofs |
| chr13 | E | 13q31 | 1 | 81625000 | 3622 | nofs | nofs |
| chr13 | E | 13q31 | 1 | 81875000 | 2506 | nofs | nofs |
| chr13 | E | 13q31 | 1 | 82125000 | 4328 | nofs | nofs |
| chr13 | E | 13q31 | 1 | 82375000 | 3187 | nofs | nofs |
| chr13 | E | 13q31 | 1 | 82625000 | 2369 | nofs | nofs |
| chr13 | E | 13q31 | 1 | 82875000 | 2825 | nofs | nofs |



|       |   |       |   |          |      |      |      |
|-------|---|-------|---|----------|------|------|------|
| chr13 | E | 13q31 | 1 | 83125000 | 2471 | nofs | nofs |
| chr13 | E | 13q31 | 1 | 83375000 | 1900 | nofs | nofs |
| chr13 | E | 13q31 | 1 | 83625000 | 3806 | nofs | nofs |
| chr13 | E | 13q31 | 1 | 83875000 | 2398 | nofs | nofs |
| chr13 | E | 13q31 | 1 | 84125000 | 3595 | nofs | nofs |
| chr13 | E | 13q31 | 1 | 84375000 | 2340 | nofs | nofs |
| chr13 | E | 13q31 | 1 | 84625000 | 2312 | nofs | nofs |
| chr13 | E | 13q31 | 1 | 84875000 | 3946 | nofs | nofs |
| chr13 | E | 13q31 | 1 | 85125000 | 3153 | nofs | nofs |
| chr13 | E | 13q31 | 1 | 85375000 | 2054 | nofs | nofs |
| chr13 | E | 13q31 | 1 | 85625000 | 2814 | nofs | nofs |
| chr13 | E | 13q31 | 1 | 85875000 | 3822 | nofs | nofs |
| chr13 | E | 13q31 | 1 | 86125000 | 2900 | nofs | nofs |
| chr13 | E | 13q31 | 1 | 86375000 | 2134 | nofs | nofs |
| chr13 | E | 13q31 | 1 | 86625000 | 4204 | nofs | nofs |
| chr13 | E | 13q31 | 1 | 86875000 | 2618 | nofs | nofs |
| chr13 | E | 13q31 | 1 | 87125000 | 5375 | nofs | nofs |
| chr13 | E | 13q31 | 1 | 87375000 | 3187 | nofs | nofs |
| chr13 | E | 13q31 | 1 | 87625000 | 1995 | nofs | nofs |
| chr13 | E | 13q31 | 1 | 87875000 | 3308 | nofs | nofs |
| chr13 | E | 13q31 | 1 | 88125000 | 3052 | nofs | nofs |
| chr13 | E | 13q31 | 1 | 88375000 | 3015 | nofs | nofs |
| chr13 | E | 13q31 | 1 | 88625000 | 2984 | nofs | nofs |
| chr13 | E | 13q31 | 1 | 88875000 | 3277 | nofs | nofs |
| chr13 | E | 13q31 | 1 | 89125000 | 2787 | nofs | nofs |
| chr13 | E | 13q31 | 1 | 89375000 | 2614 | nofs | nofs |
| chr13 | E | 13q31 | 1 | 89625000 | 2339 | nofs | nofs |
| chr13 | E | 13q31 | 1 | 89875000 | 2426 | nofs | nofs |
| chr13 | E | 13q31 | 1 | 90125000 | 2126 | nofs | nofs |
| chr13 | E | 13q31 | 1 | 90375000 | 2476 | nofs | nofs |
| chr13 | E | 13q31 | 1 | 90625000 | 2345 | nofs | nofs |
| chr13 | E | 13q31 | 1 | 90875000 | 2323 | nofs | nofs |
| chr13 | E | 13q31 | 1 | 91125000 | 2816 | nofs | nofs |
| chr13 | E | 13q31 | 1 | 91375000 | 3231 | nofs | nofs |
| chr13 | E | 13q31 | 1 | 91625000 | 2608 | nofs | nofs |
| chr13 | E | 13q31 | 1 | 91875000 | 2906 | nofs | nofs |

|       |   |       |   |           |      |      |           |
|-------|---|-------|---|-----------|------|------|-----------|
| chr13 | E | 13q31 | 1 | 92125000  | 2830 | nofs | nofs      |
| chr13 | E | 13q31 | 1 | 92375000  | 2125 | nofs | nofs      |
| chr13 | E | 13q31 | 1 | 92625000  | 5156 | nofs | nofs      |
| chr13 | E | 13q31 | 1 | 92875000  | 2903 | nofs | nofs      |
| chr13 | E | 13q31 | 1 | 93125000  | 2064 | nofs | nofs      |
| chr13 | E | 13q31 | 1 | 93375000  | 3017 | nofs | nofs      |
| chr13 | E | 13q31 | 1 | 93625000  | 2766 | nofs | nofs      |
| chr13 | E | 13q31 | 1 | 93875000  | 2989 | nofs | nofs      |
| chr13 | B | 13q32 | . | 94125000  | 2110 | fs   | fs common |
| chr13 | B | 13q32 | . | 94375000  | 2294 | fs   | fs common |
| chr13 | B | 13q32 | . | 94625000  | 2944 | fs   | fs common |
| chr13 | B | 13q32 | . | 94875000  | 3764 | fs   | fs common |
| chr13 | B | 13q32 | . | 95125000  | 3729 | fs   | fs common |
| chr13 | B | 13q32 | . | 95375000  | 2390 | fs   | fs common |
| chr13 | B | 13q32 | . | 95625000  | 2541 | fs   | fs common |
| chr13 | B | 13q32 | . | 95875000  | 2225 | fs   | fs common |
| chr13 | B | 13q32 | . | 96125000  | 1938 | fs   | fs common |
| chr13 | B | 13q32 | . | 96375000  | 1801 | fs   | fs common |
| chr13 | B | 13q32 | . | 96625000  | 2271 | fs   | fs common |
| chr13 | B | 13q32 | . | 96875000  | 2691 | fs   | fs common |
| chr13 | B | 13q32 | . | 97125000  | 2006 | fs   | fs common |
| chr13 | B | 13q32 | . | 97375000  | 3160 | fs   | fs common |
| chr13 | B | 13q32 | . | 97625000  | 5183 | fs   | fs common |
| chr13 | B | 13q32 | . | 97875000  | 2956 | fs   | fs common |
| chr13 | B | 13q32 | . | 98125000  | 5815 | fs   | fs common |
| chr13 | B | 13q32 | . | 98375000  | 1934 | fs   | fs common |
| chr13 | B | 13q32 | . | 98625000  | 3119 | fs   | fs common |
| chr13 | B | 13q32 | . | 98875000  | 3795 | fs   | fs common |
| chr13 | B | 13q32 | . | 99125000  | 2591 | fs   | fs common |
| chr13 | B | 13q32 | . | 99375000  | 4227 | fs   | fs common |
| chr13 | B | 13q32 | . | 99625000  | 2384 | fs   | fs common |
| chr13 | B | 13q32 | . | 99875000  | 2856 | fs   | fs common |
| chr13 | B | 13q32 | . | 100000000 | 2438 | fs   | fs common |
| chr13 | B | 13q32 | . | 100000000 | 3488 | fs   | fs common |
| chr13 | B | 13q32 | . | 101000000 | 2108 | fs   | fs common |
| chr13 | E | 13q33 | 3 | 101000000 | 2780 | nofs | nofs      |

|       |   |       |   |           |      |      |      |
|-------|---|-------|---|-----------|------|------|------|
| chr13 | E | 13q33 | 3 | 101000000 | 2755 | nofs | nofs |
| chr13 | E | 13q33 | 3 | 101000000 | 1760 | nofs | nofs |
| chr13 | E | 13q33 | 3 | 102000000 | 3255 | nofs | nofs |
| chr13 | E | 13q33 | 3 | 102000000 | 2055 | nofs | nofs |
| chr13 | E | 13q33 | 3 | 102000000 | 3504 | nofs | nofs |
| chr13 | E | 13q33 | 3 | 102000000 | 1843 | nofs | nofs |
| chr13 | E | 13q33 | 3 | 103000000 | 1827 | nofs | nofs |
| chr13 | E | 13q33 | 3 | 103000000 | 2686 | nofs | nofs |
| chr13 | E | 13q33 | 3 | 103000000 | 2470 | nofs | nofs |
| chr13 | E | 13q33 | 3 | 103000000 | 2555 | nofs | nofs |
| chr13 | E | 13q33 | 3 | 104000000 | 3764 | nofs | nofs |
| chr13 | E | 13q33 | 3 | 104000000 | 3451 | nofs | nofs |
| chr13 | E | 13q33 | 3 | 104000000 | 5323 | nofs | nofs |
| chr13 | E | 13q33 | 3 | 104000000 | 2269 | nofs | nofs |
| chr13 | E | 13q33 | 3 | 105000000 | 1981 | nofs | nofs |
| chr13 | E | 13q33 | 3 | 105000000 | 2125 | nofs | nofs |
| chr13 | E | 13q33 | 3 | 105000000 | 4131 | nofs | nofs |
| chr13 | E | 13q33 | 3 | 105000000 | 2791 | nofs | nofs |
| chr13 | E | 13q33 | 3 | 106000000 | 2576 | nofs | nofs |
| chr13 | E | 13q33 | 3 | 106000000 | 2141 | nofs | nofs |
| chr13 | E | 13q33 | 3 | 106000000 | 2904 | nofs | nofs |
| chr13 | E | 13q33 | 3 | 106000000 | 2829 | nofs | nofs |
| chr13 | E | 13q33 | 3 | 107000000 | 2515 | nofs | nofs |
| chr13 | E | 13q33 | 3 | 107000000 | 2746 | nofs | nofs |
| chr13 | E | 13q33 | 3 | 107000000 | 2732 | nofs | nofs |
| chr13 | E | 13q33 | 3 | 107000000 | 2637 | nofs | nofs |
| chr13 | E | 13q33 | 3 | 108000000 | 4401 | nofs | nofs |
| chr13 | E | 13q33 | 3 | 108000000 | 3228 | nofs | nofs |
| chr13 | E | 13q33 | 3 | 108000000 | 3083 | nofs | nofs |
| chr13 | E | 13q33 | 3 | 108000000 | 7107 | nofs | nofs |
| chr13 | E | 13q33 | 3 | 109000000 | 6830 | nofs | nofs |
| chr13 | E | 13q33 | 3 | 109000000 | 6992 | nofs | nofs |
| chr13 | E | 13q33 | 3 | 109000000 | 6938 | nofs | nofs |
| chr13 | B | 13q34 | . | 109000000 | 3373 | nofs | nofs |
| chr13 | B | 13q34 | . | 110000000 | 5887 | nofs | nofs |
| chr13 | B | 13q34 | . | 110000000 | 9584 | nofs | nofs |

|       |   |       |   |           |       |      |      |
|-------|---|-------|---|-----------|-------|------|------|
| chr13 | B | 13q34 | . | 110000000 | 5571  | nofs | nofs |
| chr13 | B | 13q34 | . | 110000000 | 4360  | nofs | nofs |
| chr13 | B | 13q34 | . | 111000000 | 5632  | nofs | nofs |
| chr13 | T | 13q34 | . | 111000000 | 14866 | nofs | nofs |
| chr13 | T | 13q34 | . | 111000000 | 10404 | nofs | nofs |
| chr13 | T | 13q34 | . | 111000000 | 0     | nofs | nofs |
| chr13 | T | 13q34 | . | 112000000 | 10789 | nofs | nofs |
| chr13 | T | 13q34 | . | 112000000 | 38323 | nofs | nofs |
| chr13 | T | 13q34 | . | 112000000 | 29516 | nofs | nofs |
| chr13 | T | 13q34 | . | 112000000 | 19252 | nofs | nofs |
| chr13 | T | 13q34 | . | 113000000 | 22420 | nofs | nofs |
| chr13 | T | 13q34 | . | 113000000 | 21856 | nofs | nofs |
| chr13 | T | 13q34 | . | 113000000 | 27454 | nofs | nofs |
| chr13 | T | 13q34 | . | 113000000 | 15138 | nofs | nofs |
| chr13 | T | 13q34 | . | 114000000 | 22258 | nofs | nofs |
| chr13 | T | 13q34 | . | 114000000 | 43062 | nofs | nofs |
| chr14 | C | 14p13 | . | 125000    | 0     | nofs | nofs |
| chr14 | C | 14p13 | . | 375000    | 0     | nofs | nofs |
| chr14 | C | 14p13 | . | 625000    | 0     | nofs | nofs |
| chr14 | C | 14p13 | . | 875000    | 0     | nofs | nofs |
| chr14 | C | 14p13 | . | 1125000   | 0     | nofs | nofs |
| chr14 | C | 14p13 | . | 1375000   | 0     | nofs | nofs |
| chr14 | C | 14p13 | . | 1625000   | 0     | nofs | nofs |
| chr14 | C | 14p13 | . | 1875000   | 0     | nofs | nofs |
| chr14 | C | 14p13 | . | 2125000   | 0     | nofs | nofs |
| chr14 | C | 14p13 | . | 2375000   | 0     | nofs | nofs |
| chr14 | C | 14p13 | . | 2625000   | 0     | nofs | nofs |
| chr14 | C | 14p13 | . | 2875000   | 0     | nofs | nofs |
| chr14 | C | 14p13 | . | 3125000   | 0     | nofs | nofs |
| chr14 | C | 14p12 | . | 3375000   | 0     | nofs | nofs |
| chr14 | C | 14p12 | . | 3625000   | 0     | nofs | nofs |
| chr14 | C | 14p12 | . | 3875000   | 0     | nofs | nofs |
| chr14 | C | 14p12 | . | 4125000   | 0     | nofs | nofs |
| chr14 | C | 14p12 | . | 4375000   | 0     | nofs | nofs |
| chr14 | C | 14p12 | . | 4625000   | 0     | nofs | nofs |
| chr14 | C | 14p12 | . | 4875000   | 0     | nofs | nofs |

|       |   |       |   |          |   |      |      |
|-------|---|-------|---|----------|---|------|------|
| chr14 | C | 14p12 | . | 5125000  | 0 | nofs | nofs |
| chr14 | C | 14p12 | . | 5375000  | 0 | nofs | nofs |
| chr14 | C | 14p12 | . | 5625000  | 0 | nofs | nofs |
| chr14 | C | 14p12 | . | 5875000  | 0 | nofs | nofs |
| chr14 | C | 14p12 | . | 6125000  | 0 | nofs | nofs |
| chr14 | C | 14p12 | . | 6375000  | 0 | nofs | nofs |
| chr14 | C | 14p12 | . | 6625000  | 0 | nofs | nofs |
| chr14 | C | 14p12 | . | 6875000  | 0 | nofs | nofs |
| chr14 | C | 14p11 | . | 7125000  | 0 | nofs | nofs |
| chr14 | C | 14p11 | . | 7375000  | 0 | nofs | nofs |
| chr14 | C | 14p11 | . | 7625000  | 0 | nofs | nofs |
| chr14 | C | 14p11 | . | 7875000  | 0 | nofs | nofs |
| chr14 | C | 14p11 | . | 8125000  | 0 | nofs | nofs |
| chr14 | C | 14p11 | . | 8375000  | 0 | nofs | nofs |
| chr14 | C | 14p11 | . | 8625000  | 0 | nofs | nofs |
| chr14 | C | 14p11 | . | 8875000  | 0 | nofs | nofs |
| chr14 | C | 14p11 | . | 9125000  | 0 | nofs | nofs |
| chr14 | C | 14p11 | . | 9375000  | 0 | nofs | nofs |
| chr14 | C | 14p11 | . | 9625000  | 0 | nofs | nofs |
| chr14 | C | 14p11 | . | 9875000  | 0 | nofs | nofs |
| chr14 | C | 14p11 | . | 10125000 | 0 | nofs | nofs |
| chr14 | C | 14p11 | . | 10375000 | 0 | nofs | nofs |
| chr14 | C | 14p11 | . | 10625000 | 0 | nofs | nofs |
| chr14 | C | 14p11 | . | 10875000 | 0 | nofs | nofs |
| chr14 | C | 14p11 | . | 11125000 | 0 | nofs | nofs |
| chr14 | C | 14p11 | . | 11375000 | 0 | nofs | nofs |
| chr14 | C | 14p11 | . | 11625000 | 0 | nofs | nofs |
| chr14 | C | 14p11 | . | 11875000 | 0 | nofs | nofs |
| chr14 | C | 14p11 | . | 12125000 | 0 | nofs | nofs |
| chr14 | C | 14p11 | . | 12375000 | 0 | nofs | nofs |
| chr14 | C | 14p11 | . | 12625000 | 0 | nofs | nofs |
| chr14 | C | 14p11 | . | 12875000 | 0 | nofs | nofs |
| chr14 | C | 14p11 | . | 13125000 | 0 | nofs | nofs |
| chr14 | C | 14p11 | . | 13375000 | 0 | nofs | nofs |
| chr14 | C | 14p11 | . | 13625000 | 0 | nofs | nofs |
| chr14 | C | 14p11 | . | 13875000 | 0 | nofs | nofs |

|       |   |         |   |          |        |      |      |
|-------|---|---------|---|----------|--------|------|------|
| chr14 | C | 14p11   | . | 14125000 | 0      | nofs | nofs |
| chr14 | C | 14p11   | . | 14375000 | 0      | nofs | nofs |
| chr14 | C | 14p11   | . | 14625000 | 0      | nofs | nofs |
| chr14 | C | 14p11   | . | 14875000 | 0      | nofs | nofs |
| chr14 | C | 14p11   | . | 15125000 | 0      | nofs | nofs |
| chr14 | C |         | . | 15375000 | 0      | nofs | nofs |
| chr14 | C |         | . | 15625000 | 0      | nofs | nofs |
| chr14 | C |         | . | 15875000 | 0      | nofs | nofs |
| chr14 | C |         | . | 16125000 | 0      | nofs | nofs |
| chr14 | C |         | . | 16375000 | 0      | nofs | nofs |
| chr14 | C |         | . | 16625000 | 0      | nofs | nofs |
| chr14 | C |         | . | 16875000 | 0      | nofs | nofs |
| chr14 | C |         | . | 17125000 | 0      | nofs | nofs |
| chr14 | C |         | . | 17375000 | 0      | nofs | nofs |
| chr14 | C |         | . | 17625000 | 0      | nofs | nofs |
| chr14 | C |         | . | 17875000 | 0      | nofs | nofs |
| chr14 | C | 14q11.1 | . | 18125000 | 57074  | nofs | nofs |
| chr14 | C | 14q11.1 | . | 18375000 | 125591 | nofs | nofs |
| chr14 | C | 14q11.1 | . | 18625000 | 5483   | nofs | nofs |
| chr14 | C | 14q11.1 | . | 18875000 | 6088   | nofs | nofs |
| chr14 | C | 14q11.2 | 3 | 19125000 | 4109   | nofs | nofs |
| chr14 | C | 14q11.2 | 3 | 19375000 | 3645   | nofs | nofs |
| chr14 | C | 14q11.2 | 3 | 19625000 | 2150   | nofs | nofs |
| chr14 | C | 14q11.2 | 3 | 19875000 | 5681   | nofs | nofs |
| chr14 | C | 14q11.2 | 3 | 20125000 | 4301   | nofs | nofs |
| chr14 | C | 14q11.2 | 3 | 20375000 | 3280   | nofs | nofs |
| chr14 | C | 14q11.2 | 3 | 20625000 | 3872   | nofs | nofs |
| chr14 | C | 14q11.2 | 3 | 20875000 | 5258   | nofs | nofs |
| chr14 | C | 14q11.2 | 3 | 21125000 | 5035   | nofs | nofs |
| chr14 | E | 14q11.2 | 3 | 21375000 | 1567   | nofs | nofs |
| chr14 | E | 14q11.2 | 3 | 21625000 | 2503   | nofs | nofs |
| chr14 | E | 14q11.2 | 3 | 21875000 | 1655   | nofs | nofs |
| chr14 | E | 14q11.2 | 3 | 22125000 | 7155   | nofs | nofs |
| chr14 | E | 14q11.2 | 3 | 22375000 | 6805   | nofs | nofs |
| chr14 | E | 14q11.2 | 3 | 22625000 | 6377   | nofs | nofs |
| chr14 | E | 14q11.2 | 3 | 22875000 | 3110   | nofs | nofs |

|       |   |         |   |          |      |      |      |
|-------|---|---------|---|----------|------|------|------|
| chr14 | E | 14q11.2 | 3 | 23125000 | 3929 | nofs | nofs |
| chr14 | E | 14q11.2 | 3 | 23375000 | 3650 | nofs | nofs |
| chr14 | E | 14q11.2 | 3 | 23625000 | 2111 | nofs | nofs |
| chr14 | E | 14q11.2 | 3 | 23875000 | 2393 | nofs | nofs |
| chr14 | E | 14q11.2 | 3 | 24125000 | 3370 | nofs | nofs |
| chr14 | E | 14q11.2 | 3 | 24375000 | 1383 | nofs | nofs |
| chr14 | B | 14q12   | . | 24625000 | 2282 | nofs | nofs |
| chr14 | B | 14q12   | . | 24875000 | 1739 | nofs | nofs |
| chr14 | B | 14q12   | . | 25125000 | 2198 | nofs | nofs |
| chr14 | B | 14q12   | . | 25375000 | 3461 | nofs | nofs |
| chr14 | B | 14q12   | . | 25625000 | 1827 | nofs | nofs |
| chr14 | B | 14q12   | . | 25875000 | 2273 | nofs | nofs |
| chr14 | B | 14q12   | . | 26125000 | 1264 | nofs | nofs |
| chr14 | B | 14q12   | . | 26375000 | 1937 | nofs | nofs |
| chr14 | B | 14q12   | . | 26625000 | 2326 | nofs | nofs |
| chr14 | B | 14q12   | . | 26875000 | 2202 | nofs | nofs |
| chr14 | B | 14q12   | . | 27125000 | 1743 | nofs | nofs |
| chr14 | B | 14q12   | . | 27375000 | 2469 | nofs | nofs |
| chr14 | B | 14q12   | . | 27625000 | 2025 | nofs | nofs |
| chr14 | B | 14q12   | . | 27875000 | 1948 | nofs | nofs |
| chr14 | B | 14q12   | . | 28125000 | 2284 | nofs | nofs |
| chr14 | B | 14q12   | . | 28375000 | 2385 | nofs | nofs |
| chr14 | B | 14q12   | . | 28625000 | 4251 | nofs | nofs |
| chr14 | B | 14q12   | . | 28875000 | 2751 | nofs | nofs |
| chr14 | B | 14q12   | . | 29125000 | 3206 | nofs | nofs |
| chr14 | B | 14q12   | . | 29375000 | 3148 | nofs | nofs |
| chr14 | B | 14q12   | . | 29625000 | 2068 | nofs | nofs |
| chr14 | B | 14q12   | . | 29875000 | 1549 | nofs | nofs |
| chr14 | B | 14q12   | . | 30125000 | 1825 | nofs | nofs |
| chr14 | B | 14q12   | . | 30375000 | 2156 | nofs | nofs |
| chr14 | B | 14q12   | . | 30625000 | 2721 | nofs | nofs |
| chr14 | B | 14q12   | . | 30875000 | 5444 | nofs | nofs |
| chr14 | B | 14q12   | . | 31125000 | 3648 | nofs | nofs |
| chr14 | B | 14q12   | . | 31375000 | 2840 | nofs | nofs |
| chr14 | B | 14q12   | . | 31625000 | 2975 | nofs | nofs |
| chr14 | B | 14q12   | . | 31875000 | 2707 | nofs | nofs |

|       |   |       |   |          |      |      |      |
|-------|---|-------|---|----------|------|------|------|
| chr14 | B | 14q12 | . | 32125000 | 1993 | nofs | nofs |
| chr14 | E | 14q13 | 1 | 32375000 | 3002 | nofs | nofs |
| chr14 | E | 14q13 | 1 | 32625000 | 1374 | nofs | nofs |
| chr14 | E | 14q13 | 1 | 32875000 | 1269 | nofs | nofs |
| chr14 | E | 14q13 | 1 | 33125000 | 679  | nofs | nofs |
| chr14 | E | 14q13 | 1 | 33375000 | 2363 | nofs | nofs |
| chr14 | E | 14q13 | 1 | 33625000 | 4102 | nofs | nofs |
| chr14 | E | 14q13 | 1 | 33875000 | 5352 | nofs | nofs |
| chr14 | E | 14q13 | 1 | 34125000 | 7947 | nofs | nofs |
| chr14 | E | 14q13 | 1 | 34375000 | 4913 | nofs | nofs |
| chr14 | E | 14q13 | 1 | 34625000 | 4831 | nofs | nofs |
| chr14 | E | 14q13 | 1 | 34875000 | 2846 | nofs | nofs |
| chr14 | E | 14q13 | 1 | 35125000 | 2490 | nofs | nofs |
| chr14 | E | 14q13 | 1 | 35375000 | 4751 | nofs | nofs |
| chr14 | E | 14q13 | 1 | 35625000 | 3537 | nofs | nofs |
| chr14 | E | 14q13 | 1 | 35875000 | 1948 | nofs | nofs |
| chr14 | E | 14q13 | 1 | 36125000 | 1295 | nofs | nofs |
| chr14 | E | 14q13 | 1 | 36375000 | 1903 | nofs | nofs |
| chr14 | E | 14q13 | 1 | 36625000 | 2031 | nofs | nofs |
| chr14 | E | 14q13 | 1 | 36875000 | 1542 | nofs | nofs |
| chr14 | E | 14q21 | 4 | 37125000 | 2810 | nofs | nofs |
| chr14 | E | 14q21 | 4 | 37375000 | 2094 | nofs | nofs |
| chr14 | E | 14q21 | 4 | 37625000 | 3396 | nofs | nofs |
| chr14 | E | 14q21 | 4 | 37875000 | 1635 | nofs | nofs |
| chr14 | E | 14q21 | 4 | 38125000 | 1720 | nofs | nofs |
| chr14 | E | 14q21 | 4 | 38375000 | 2381 | nofs | nofs |
| chr14 | E | 14q21 | 4 | 38625000 | 4019 | nofs | nofs |
| chr14 | E | 14q21 | 4 | 38875000 | 3589 | nofs | nofs |
| chr14 | E | 14q21 | 4 | 39125000 | 1271 | nofs | nofs |
| chr14 | E | 14q21 | 4 | 39375000 | 1644 | nofs | nofs |
| chr14 | E | 14q21 | 4 | 39625000 | 2277 | nofs | nofs |
| chr14 | E | 14q21 | 4 | 39875000 | 1698 | nofs | nofs |
| chr14 | E | 14q21 | 4 | 40125000 | 2338 | nofs | nofs |
| chr14 | E | 14q21 | 4 | 40375000 | 2850 | nofs | nofs |
| chr14 | E | 14q21 | 4 | 40625000 | 2381 | nofs | nofs |
| chr14 | E | 14q21 | 4 | 40875000 | 2353 | nofs | nofs |



|       |   |       |   |          |       |      |      |
|-------|---|-------|---|----------|-------|------|------|
| chr14 | E | 14q21 | 4 | 41125000 | 4771  | nofs | nofs |
| chr14 | E | 14q21 | 4 | 41375000 | 2730  | nofs | nofs |
| chr14 | E | 14q21 | 4 | 41625000 | 4194  | nofs | nofs |
| chr14 | E | 14q21 | 4 | 41875000 | 2541  | nofs | nofs |
| chr14 | E | 14q21 | 4 | 42125000 | 3790  | nofs | nofs |
| chr14 | E | 14q21 | 4 | 42375000 | 2913  | nofs | nofs |
| chr14 | E | 14q21 | 4 | 42625000 | 3062  | nofs | nofs |
| chr14 | E | 14q21 | 4 | 42875000 | 2277  | nofs | nofs |
| chr14 | E | 14q21 | 4 | 43125000 | 2900  | nofs | nofs |
| chr14 | E | 14q21 | 4 | 43375000 | 2257  | nofs | nofs |
| chr14 | E | 14q21 | 4 | 43625000 | 2663  | nofs | nofs |
| chr14 | E | 14q21 | 4 | 43875000 | 2496  | nofs | nofs |
| chr14 | E | 14q21 | 4 | 44125000 | 4358  | nofs | nofs |
| chr14 | E | 14q21 | 4 | 44375000 | 3578  | nofs | nofs |
| chr14 | E | 14q21 | 4 | 44625000 | 3019  | nofs | nofs |
| chr14 | E | 14q21 | 4 | 44875000 | 2982  | nofs | nofs |
| chr14 | E | 14q21 | 4 | 45125000 | 2633  | nofs | nofs |
| chr14 | E | 14q21 | 4 | 45375000 | 17752 | nofs | nofs |
| chr14 | E | 14q21 | 4 | 45625000 | 1812  | nofs | nofs |
| chr14 | E | 14q21 | 4 | 45875000 | 1932  | nofs | nofs |
| chr14 | E | 14q21 | 4 | 46125000 | 2591  | nofs | nofs |
| chr14 | E | 14q21 | 4 | 46375000 | 1668  | nofs | nofs |
| chr14 | E | 14q21 | 4 | 46625000 | 2213  | nofs | nofs |
| chr14 | E | 14q21 | 4 | 46875000 | 2489  | nofs | nofs |
| chr14 | E | 14q21 | 4 | 47125000 | 3961  | nofs | nofs |
| chr14 | E | 14q21 | 4 | 47375000 | 1558  | nofs | nofs |
| chr14 | E | 14q21 | 4 | 47625000 | 2239  | nofs | nofs |
| chr14 | E | 14q21 | 4 | 47875000 | 1465  | nofs | nofs |
| chr14 | E | 14q21 | 4 | 48125000 | 2777  | nofs | nofs |
| chr14 | E | 14q21 | 4 | 48375000 | 2961  | nofs | nofs |
| chr14 | E | 14q21 | 4 | 48625000 | 1157  | nofs | nofs |
| chr14 | E | 14q21 | 4 | 48875000 | 1515  | nofs | nofs |
| chr14 | E | 14q21 | 4 | 49125000 | 5337  | nofs | nofs |
| chr14 | E | 14q21 | 4 | 49375000 | 3254  | nofs | nofs |
| chr14 | E | 14q21 | 4 | 49625000 | 2599  | nofs | nofs |
| chr14 | E | 14q21 | 4 | 49875000 | 3022  | nofs | nofs |

|       |   |       |   |          |      |           |           |
|-------|---|-------|---|----------|------|-----------|-----------|
| chr14 | E | 14q21 | 4 | 50125000 | 2308 | nofs      | nofs      |
| chr14 | E | 14q21 | 4 | 50375000 | 2681 | nofs      | nofs      |
| chr14 | E | 14q21 | 4 | 50625000 | 1776 | nofs      | nofs      |
| chr14 | E | 14q21 | 4 | 50875000 | 2623 | nofs      | nofs      |
| chr14 | E | 14q22 | 3 | 51125000 | 2495 | nofs      | nofs      |
| chr14 | E | 14q22 | 3 | 51375000 | 6743 | nofs      | nofs      |
| chr14 | E | 14q22 | 3 | 51625000 | 2491 | nofs      | nofs      |
| chr14 | E | 14q22 | 3 | 51875000 | 2056 | nofs      | nofs      |
| chr14 | E | 14q22 | 3 | 52125000 | 3216 | nofs      | nofs      |
| chr14 | E | 14q22 | 3 | 52375000 | 3056 | nofs      | nofs      |
| chr14 | E | 14q22 | 3 | 52625000 | 3481 | nofs      | nofs      |
| chr14 | E | 14q22 | 3 | 52875000 | 2256 | nofs      | nofs      |
| chr14 | E | 14q22 | 3 | 53125000 | 2036 | nofs      | nofs      |
| chr14 | E | 14q22 | 3 | 53375000 | 1978 | nofs      | nofs      |
| chr14 | E | 14q22 | 3 | 53625000 | 2761 | nofs      | nofs      |
| chr14 | E | 14q22 | 3 | 53875000 | 2732 | nofs      | nofs      |
| chr14 | E | 14q22 | 3 | 54125000 | 2364 | nofs      | nofs      |
| chr14 | E | 14q22 | 3 | 54375000 | 2596 | nofs      | nofs      |
| chr14 | E | 14q22 | 3 | 54625000 | 2644 | nofs      | nofs      |
| chr14 | E | 14q22 | 3 | 54875000 | 3768 | nofs      | nofs      |
| chr14 | E | 14q22 | 3 | 55125000 | 1973 | nofs      | nofs      |
| chr14 | E | 14q22 | 3 | 55375000 | 2219 | nofs      | nofs      |
| chr14 | E | 14q22 | 3 | 55625000 | 1941 | nofs      | nofs      |
| chr14 | E | 14q22 | 3 | 55875000 | 1417 | nofs      | nofs      |
| chr14 | E | 14q22 | 3 | 56125000 | 1813 | nofs      | nofs      |
| chr14 | E | 14q22 | 3 | 56375000 | 2915 | nofs      | nofs      |
| chr14 | E | 14q22 | 3 | 56625000 | 3180 | nofs      | nofs      |
| chr14 | E | 14q22 | 3 | 56875000 | 2265 | nofs      | nofs      |
| chr14 | E | 14q22 | 3 | 57125000 | 1652 | nofs      | nofs      |
| chr14 | E | 14q22 | 3 | 57375000 | 2277 | nofs      | nofs      |
| chr14 | E | 14q23 | 1 | 57625000 | 1982 | fs common | fs common |
| chr14 | E | 14q23 | 1 | 57875000 | 1933 | fs common | fs common |
| chr14 | E | 14q23 | 1 | 58125000 | 1807 | fs common | fs common |
| chr14 | E | 14q23 | 1 | 58375000 | 2662 | fs common | fs common |
| chr14 | E | 14q23 | 1 | 58625000 | 2661 | fs common | fs common |
| chr14 | E | 14q23 | 1 | 58875000 | 1901 | fs common | fs common |

|       |   |         |   |          |      |    |           |
|-------|---|---------|---|----------|------|----|-----------|
| chr14 | E | 14q23   | 1 | 59125000 | 1220 | fs | fs common |
| chr14 | E | 14q23   | 1 | 59375000 | 3429 | fs | fs common |
| chr14 | E | 14q23   | 1 | 59625000 | 1305 | fs | fs common |
| chr14 | E | 14q23   | 1 | 59875000 | 3879 | fs | fs common |
| chr14 | E | 14q23   | 1 | 60125000 | 2843 | fs | fs common |
| chr14 | E | 14q23   | 1 | 60375000 | 2412 | fs | fs common |
| chr14 | E | 14q23   | 1 | 60625000 | 2566 | fs | fs common |
| chr14 | E | 14q23   | 1 | 60875000 | 2048 | fs | fs common |
| chr14 | E | 14q23   | 1 | 61125000 | 1374 | fs | fs common |
| chr14 | E | 14q23   | 1 | 61375000 | 1583 | fs | fs common |
| chr14 | E | 14q23   | 1 | 61625000 | 1663 | fs | fs common |
| chr14 | E | 14q23   | 1 | 61875000 | 1835 | fs | fs common |
| chr14 | E | 14q23   | 1 | 62125000 | 1244 | fs | fs common |
| chr14 | E | 14q23   | 1 | 62375000 | 2532 | fs | fs common |
| chr14 | E | 14q23   | 1 | 62625000 | 3094 | fs | fs common |
| chr14 | E | 14q23   | 1 | 62875000 | 3253 | fs | fs common |
| chr14 | E | 14q23   | 1 | 63125000 | 4069 | fs | fs common |
| chr14 | E | 14q23   | 1 | 63375000 | 6467 | fs | fs common |
| chr14 | E | 14q23   | 1 | 63625000 | 3762 | fs | fs common |
| chr14 | E | 14q23   | 1 | 63875000 | 2810 | fs | fs common |
| chr14 | E | 14q23   | 1 | 64125000 | 2849 | fs | fs common |
| chr14 | E | 14q23   | 1 | 64375000 | 4370 | fs | fs common |
| chr14 | E | 14q23   | 1 | 64625000 | 2301 | fs | fs common |
| chr14 | E | 14q23   | 1 | 64875000 | 3887 | fs | fs common |
| chr14 | E | 14q23   | 1 | 65125000 | 4338 | fs | fs common |
| chr14 | E | 14q23   | 1 | 65375000 | 3806 | fs | fs common |
| chr14 | E | 14q23   | 1 | 65625000 | 1533 | fs | fs common |
| chr14 | E | 14q23   | 1 | 65875000 | 1560 | fs | fs common |
| chr14 | E | 14q23   | 1 | 66125000 | 2681 | fs | fs common |
| chr14 | E | 14q23   | 1 | 66375000 | 1895 | fs | fs common |
| chr14 | E | 14q23   | 1 | 66625000 | 3871 | fs | fs common |
| chr14 | E | 14q23   | 1 | 66875000 | 2883 | fs | fs common |
| chr14 | E | 14q23   | 1 | 67125000 | 2191 | fs | fs common |
| chr14 | B | 14q24.1 | . | 67375000 | 2123 | fs | fs common |
| chr14 | B | 14q24.1 | . | 67625000 | 2269 | fs | fs common |
| chr14 | B | 14q24.1 | . | 67875000 | 2670 | fs | fs common |

|       |   |         |   |          |      |      |           |
|-------|---|---------|---|----------|------|------|-----------|
| chr14 | B | 14q24.1 | . | 68125000 | 2910 | fs   | fs common |
| chr14 | B | 14q24.1 | . | 68375000 | 2915 | fs   | fs common |
| chr14 | B | 14q24.1 | . | 68625000 | 2617 | fs   | fs common |
| chr14 | B | 14q24.1 | . | 68875000 | 2271 | fs   | fs common |
| chr14 | B | 14q24.1 | . | 69125000 | 3103 | fs   | fs common |
| chr14 | B | 14q24.1 | . | 69375000 | 3727 | fs   | fs common |
| chr14 | B | 14q24.2 | . | 69625000 | 2103 | nofs | nofs      |
| chr14 | B | 14q24.2 | . | 69875000 | 3638 | nofs | nofs      |
| chr14 | B | 14q24.2 | . | 70125000 | 3290 | nofs | nofs      |
| chr14 | B | 14q24.2 | . | 70375000 | 3351 | nofs | nofs      |
| chr14 | B | 14q24.2 | . | 70625000 | 2294 | nofs | nofs      |
| chr14 | B | 14q24.2 | . | 70875000 | 3094 | nofs | nofs      |
| chr14 | B | 14q24.2 | . | 71125000 | 4044 | nofs | nofs      |
| chr14 | B | 14q24.2 | . | 71375000 | 2554 | nofs | nofs      |
| chr14 | B | 14q24.2 | . | 71625000 | 1892 | nofs | nofs      |
| chr14 | B | 14q24.2 | . | 71875000 | 1318 | nofs | nofs      |
| chr14 | B | 14q24.2 | . | 72125000 | 1970 | nofs | nofs      |
| chr14 | B | 14q24.2 | . | 72375000 | 3767 | nofs | nofs      |
| chr14 | B | 14q24.2 | . | 72625000 | 5261 | nofs | nofs      |
| chr14 | B | 14q24.2 | . | 72875000 | 3317 | nofs | nofs      |
| chr14 | B | 14q24.3 | . | 73125000 | 5102 | nofs | nofs      |
| chr14 | B | 14q24.3 | . | 73375000 | 3058 | nofs | nofs      |
| chr14 | B | 14q24.3 | . | 73625000 | 4511 | nofs | nofs      |
| chr14 | B | 14q24.3 | . | 73875000 | 5404 | nofs | nofs      |
| chr14 | B | 14q24.3 | . | 74125000 | 3035 | nofs | nofs      |
| chr14 | B | 14q24.3 | . | 74375000 | 2769 | nofs | nofs      |
| chr14 | B | 14q24.3 | . | 74625000 | 5359 | nofs | nofs      |
| chr14 | B | 14q24.3 | . | 74875000 | 3304 | nofs | nofs      |
| chr14 | B | 14q24.3 | . | 75125000 | 3182 | nofs | nofs      |
| chr14 | B | 14q24.3 | . | 75375000 | 2527 | nofs | nofs      |
| chr14 | B | 14q24.3 | . | 75625000 | 1311 | nofs | nofs      |
| chr14 | B | 14q24.3 | . | 75875000 | 4681 | nofs | nofs      |
| chr14 | B | 14q24.3 | . | 76125000 | 3659 | nofs | nofs      |
| chr14 | B | 14q24.3 | . | 76375000 | 7578 | nofs | nofs      |
| chr14 | B | 14q24.3 | . | 76625000 | 3720 | nofs | nofs      |
| chr14 | B | 14q24.3 | . | 76875000 | 3638 | nofs | nofs      |

|       |   |         |   |          |      |      |      |
|-------|---|---------|---|----------|------|------|------|
| chr14 | B | 14q24.3 | . | 77125000 | 4642 | nofs | nofs |
| chr14 | B | 14q24.3 | . | 77375000 | 2922 | nofs | nofs |
| chr14 | B | 14q24.3 | . | 77625000 | 2483 | nofs | nofs |
| chr14 | B | 14q24.3 | . | 77875000 | 1600 | nofs | nofs |
| chr14 | B | 14q24.3 | . | 78125000 | 3128 | nofs | nofs |
| chr14 | B | 14q24.3 | . | 78375000 | 2095 | nofs | nofs |
| chr14 | B | 14q31   | . | 78625000 | 1756 | nofs | nofs |
| chr14 | B | 14q31   | . | 78875000 | 3181 | nofs | nofs |
| chr14 | B | 14q31   | . | 79125000 | 1864 | nofs | nofs |
| chr14 | B | 14q31   | . | 79375000 | 2941 | nofs | nofs |
| chr14 | B | 14q31   | . | 79625000 | 1528 | nofs | nofs |
| chr14 | B | 14q31   | . | 79875000 | 2438 | nofs | nofs |
| chr14 | B | 14q31   | . | 80125000 | 1886 | nofs | nofs |
| chr14 | B | 14q31   | . | 80375000 | 2115 | nofs | nofs |
| chr14 | B | 14q31   | . | 80625000 | 1246 | nofs | nofs |
| chr14 | B | 14q31   | . | 80875000 | 3606 | nofs | nofs |
| chr14 | B | 14q31   | . | 81125000 | 4078 | nofs | nofs |
| chr14 | B | 14q31   | . | 81375000 | 3057 | nofs | nofs |
| chr14 | B | 14q31   | . | 81625000 | 2065 | nofs | nofs |
| chr14 | B | 14q31   | . | 81875000 | 2558 | nofs | nofs |
| chr14 | B | 14q31   | . | 82125000 | 4331 | nofs | nofs |
| chr14 | B | 14q31   | . | 82375000 | 4504 | nofs | nofs |
| chr14 | B | 14q31   | . | 82625000 | 2956 | nofs | nofs |
| chr14 | B | 14q31   | . | 82875000 | 2974 | nofs | nofs |
| chr14 | B | 14q31   | . | 83125000 | 1955 | nofs | nofs |
| chr14 | B | 14q31   | . | 83375000 | 2060 | nofs | nofs |
| chr14 | B | 14q31   | . | 83625000 | 4123 | nofs | nofs |
| chr14 | B | 14q31   | . | 83875000 | 2470 | nofs | nofs |
| chr14 | B | 14q31   | . | 84125000 | 5105 | nofs | nofs |
| chr14 | B | 14q31   | . | 84375000 | 3616 | nofs | nofs |
| chr14 | B | 14q31   | . | 84625000 | 2465 | nofs | nofs |
| chr14 | B | 14q31   | . | 84875000 | 2320 | nofs | nofs |
| chr14 | B | 14q31   | . | 85125000 | 2400 | nofs | nofs |
| chr14 | B | 14q31   | . | 85375000 | 5636 | nofs | nofs |
| chr14 | B | 14q31   | . | 85625000 | 2864 | nofs | nofs |
| chr14 | B | 14q31   | . | 85875000 | 5114 | nofs | nofs |

|       |   |         |   |          |      |      |      |
|-------|---|---------|---|----------|------|------|------|
| chr14 | B | 14q31   | . | 86125000 | 2438 | nofs | nofs |
| chr14 | B | 14q31   | . | 86375000 | 3144 | nofs | nofs |
| chr14 | B | 14q31   | . | 86625000 | 2858 | nofs | nofs |
| chr14 | B | 14q31   | . | 86875000 | 2807 | nofs | nofs |
| chr14 | B | 14q31   | . | 87125000 | 1908 | nofs | nofs |
| chr14 | B | 14q31   | . | 87375000 | 2289 | nofs | nofs |
| chr14 | B | 14q31   | . | 87625000 | 1521 | nofs | nofs |
| chr14 | B | 14q31   | . | 87875000 | 1366 | nofs | nofs |
| chr14 | B | 14q31   | . | 88125000 | 2804 | nofs | nofs |
| chr14 | B | 14q32.1 | . | 88375000 | 3862 | nofs | nofs |
| chr14 | B | 14q32.1 | . | 88625000 | 2335 | nofs | nofs |
| chr14 | B | 14q32.1 | . | 88875000 | 5185 | nofs | nofs |
| chr14 | B | 14q32.1 | . | 89125000 | 3910 | nofs | nofs |
| chr14 | B | 14q32.1 | . | 89375000 | 3043 | nofs | nofs |
| chr14 | B | 14q32.1 | . | 89625000 | 2890 | nofs | nofs |
| chr14 | B | 14q32.1 | . | 89875000 | 2901 | nofs | nofs |
| chr14 | B | 14q32.1 | . | 90125000 | 4333 | nofs | nofs |
| chr14 | B | 14q32.1 | . | 90375000 | 3151 | nofs | nofs |
| chr14 | B | 14q32.1 | . | 90625000 | 5000 | nofs | nofs |
| chr14 | B | 14q32.1 | . | 90875000 | 3769 | nofs | nofs |
| chr14 | B | 14q32.1 | . | 91125000 | 5689 | nofs | nofs |
| chr14 | B | 14q32.1 | . | 91375000 | 2574 | nofs | nofs |
| chr14 | B | 14q32.1 | . | 91625000 | 3042 | nofs | nofs |
| chr14 | B | 14q32.1 | . | 91875000 | 3861 | nofs | nofs |
| chr14 | B | 14q32.1 | . | 92125000 | 5990 | nofs | nofs |
| chr14 | B | 14q32.1 | . | 92375000 | 4249 | nofs | nofs |
| chr14 | B | 14q32.1 | . | 92625000 | 6459 | nofs | nofs |
| chr14 | B | 14q32.1 | . | 92875000 | 2136 | nofs | nofs |
| chr14 | B | 14q32.1 | . | 93125000 | 2140 | nofs | nofs |
| chr14 | B | 14q32.1 | . | 93375000 | 3900 | nofs | nofs |
| chr14 | B | 14q32.1 | . | 93625000 | 3310 | nofs | nofs |
| chr14 | B | 14q32.1 | . | 93875000 | 3244 | nofs | nofs |
| chr14 | B | 14q32.1 | . | 94125000 | 6379 | nofs | nofs |
| chr14 | B | 14q32.1 | . | 94375000 | 6398 | nofs | nofs |
| chr14 | B | 14q32.1 | . | 94625000 | 3762 | nofs | nofs |
| chr14 | B | 14q32.1 | . | 94875000 | 6545 | nofs | nofs |

|       |   |         |   |           |       |      |      |
|-------|---|---------|---|-----------|-------|------|------|
| chr14 | B | 14q32.1 | . | 95125000  | 3671  | nofs | nofs |
| chr14 | B | 14q32.1 | . | 95375000  | 2942  | nofs | nofs |
| chr14 | B | 14q32.2 | . | 95625000  | 3451  | nofs | nofs |
| chr14 | B | 14q32.2 | . | 95875000  | 3812  | nofs | nofs |
| chr14 | B | 14q32.2 | . | 96125000  | 3488  | nofs | nofs |
| chr14 | B | 14q32.2 | . | 96375000  | 3900  | nofs | nofs |
| chr14 | B | 14q32.2 | . | 96625000  | 5370  | nofs | nofs |
| chr14 | B | 14q32.2 | . | 96875000  | 3689  | nofs | nofs |
| chr14 | B | 14q32.2 | . | 97125000  | 1809  | nofs | nofs |
| chr14 | B | 14q32.2 | . | 97375000  | 3824  | nofs | nofs |
| chr14 | B | 14q32.2 | . | 97625000  | 3815  | nofs | nofs |
| chr14 | B | 14q32.2 | . | 97875000  | 3611  | nofs | nofs |
| chr14 | B | 14q32.2 | . | 98125000  | 2872  | nofs | nofs |
| chr14 | B | 14q32.2 | . | 98375000  | 3537  | nofs | nofs |
| chr14 | B | 14q32.2 | . | 98625000  | 3817  | nofs | nofs |
| chr14 | B | 14q32.2 | . | 98875000  | 5430  | nofs | nofs |
| chr14 | B | 14q32.2 | . | 99125000  | 5525  | nofs | nofs |
| chr14 | B | 14q32.2 | . | 99375000  | 3182  | nofs | nofs |
| chr14 | B | 14q32.2 | . | 99625000  | 6600  | nofs | nofs |
| chr14 | B | 14q32.2 | . | 99875000  | 3130  | nofs | nofs |
| chr14 | B | 14q32.2 | . | 100000000 | 6188  | nofs | nofs |
| chr14 | B | 14q32.2 | . | 100000000 | 5564  | nofs | nofs |
| chr14 | E | 14q32.3 | 1 | 101000000 | 5792  | nofs | nofs |
| chr14 | E | 14q32.3 | 1 | 101000000 | 5916  | nofs | nofs |
| chr14 | E | 14q32.3 | 1 | 101000000 | 7619  | nofs | nofs |
| chr14 | E | 14q32.3 | 1 | 101000000 | 7202  | nofs | nofs |
| chr14 | E | 14q32.3 | 1 | 102000000 | 4816  | nofs | nofs |
| chr14 | E | 14q32.3 | 1 | 102000000 | 4822  | nofs | nofs |
| chr14 | E | 14q32.3 | 1 | 102000000 | 8068  | nofs | nofs |
| chr14 | E | 14q32.3 | 1 | 102000000 | 7144  | nofs | nofs |
| chr14 | E | 14q32.3 | 1 | 103000000 | 7685  | nofs | nofs |
| chr14 | E | 14q32.3 | 1 | 103000000 | 7923  | nofs | nofs |
| chr14 | T | 14q32.3 | 1 | 103000000 | 4391  | nofs | nofs |
| chr14 | T | 14q32.3 | 1 | 103000000 | 3805  | nofs | nofs |
| chr14 | T | 14q32.3 | 1 | 104000000 | 8464  | nofs | nofs |
| chr14 | T | 14q32.3 | 1 | 104000000 | 14647 | nofs | nofs |

|       |   |         |   |           |       |      |      |
|-------|---|---------|---|-----------|-------|------|------|
| chr14 | T | 14q32.3 | 1 | 104000000 | 11267 | nofs | nofs |
| chr14 | T | 14q32.3 | 1 | 104000000 | 28270 | nofs | nofs |
| chr14 | T | 14q32.3 | 1 | 105000000 | 12601 | nofs | nofs |
| chr14 | T | 14q32.3 | 1 | 105000000 | 25081 | nofs | nofs |
| chr14 | T | 14q32.3 | 1 | 105000000 | 33501 | nofs | nofs |
| chr14 | T | 14q32.3 | 1 | 105000000 | 20486 | nofs | nofs |
| chr14 | T | 14q32.3 | 1 | 106000000 | 7999  | nofs | nofs |
| chr14 | T | 14q32.3 | 1 | 106000000 | 2957  | nofs | nofs |
| chr14 | T | 14q32.3 | 1 | 106000000 | 4799  | nofs | nofs |
| chr15 | C | 15p13   | . | 125000    | 0     | nofs | nofs |
| chr15 | C | 15p13   | . | 375000    | 0     | nofs | nofs |
| chr15 | C | 15p13   | . | 625000    | 0     | nofs | nofs |
| chr15 | C | 15p13   | . | 875000    | 0     | nofs | nofs |
| chr15 | C | 15p13   | . | 1125000   | 0     | nofs | nofs |
| chr15 | C | 15p13   | . | 1375000   | 0     | nofs | nofs |
| chr15 | C | 15p13   | . | 1625000   | 0     | nofs | nofs |
| chr15 | C | 15p13   | . | 1875000   | 0     | nofs | nofs |
| chr15 | C | 15p13   | . | 2125000   | 0     | nofs | nofs |
| chr15 | C | 15p13   | . | 2375000   | 0     | nofs | nofs |
| chr15 | C | 15p13   | . | 2625000   | 0     | nofs | nofs |
| chr15 | C | 15p13   | . | 2875000   | 0     | nofs | nofs |
| chr15 | C | 15p13   | . | 3125000   | 0     | nofs | nofs |
| chr15 | C | 15p13   | . | 3375000   | 0     | nofs | nofs |
| chr15 | C | 15p13   | . | 3625000   | 0     | nofs | nofs |
| chr15 | C | 15p12   | . | 3875000   | 0     | nofs | nofs |
| chr15 | C | 15p12   | . | 4125000   | 0     | nofs | nofs |
| chr15 | C | 15p12   | . | 4375000   | 0     | nofs | nofs |
| chr15 | C | 15p12   | . | 4625000   | 0     | nofs | nofs |
| chr15 | C | 15p12   | . | 4875000   | 0     | nofs | nofs |
| chr15 | C | 15p12   | . | 5125000   | 0     | nofs | nofs |
| chr15 | C | 15p12   | . | 5375000   | 0     | nofs | nofs |
| chr15 | C | 15p12   | . | 5625000   | 0     | nofs | nofs |
| chr15 | C | 15p12   | . | 5875000   | 0     | nofs | nofs |
| chr15 | C | 15p12   | . | 6125000   | 0     | nofs | nofs |
| chr15 | C | 15p12   | . | 6375000   | 0     | nofs | nofs |
| chr15 | C | 15p12   | . | 6625000   | 0     | nofs | nofs |



|       |   |       |   |          |   |      |      |
|-------|---|-------|---|----------|---|------|------|
| chr15 | C | 15p12 | . | 6875000  | 0 | nofs | nofs |
| chr15 | C | 15p12 | . | 7125000  | 0 | nofs | nofs |
| chr15 | C | 15p12 | . | 7375000  | 0 | nofs | nofs |
| chr15 | C | 15p12 | . | 7625000  | 0 | nofs | nofs |
| chr15 | C | 15p12 | . | 7875000  | 0 | nofs | nofs |
| chr15 | C | 15p11 | . | 8125000  | 0 | nofs | nofs |
| chr15 | C | 15p11 | . | 8375000  | 0 | nofs | nofs |
| chr15 | C | 15p11 | . | 8625000  | 0 | nofs | nofs |
| chr15 | C | 15p11 | . | 8875000  | 0 | nofs | nofs |
| chr15 | C | 15p11 | . | 9125000  | 0 | nofs | nofs |
| chr15 | C | 15p11 | . | 9375000  | 0 | nofs | nofs |
| chr15 | C | 15p11 | . | 9625000  | 0 | nofs | nofs |
| chr15 | C | 15p11 | . | 9875000  | 0 | nofs | nofs |
| chr15 | C | 15p11 | . | 10125000 | 0 | nofs | nofs |
| chr15 | C | 15p11 | . | 10375000 | 0 | nofs | nofs |
| chr15 | C | 15p11 | . | 10625000 | 0 | nofs | nofs |
| chr15 | C | 15p11 | . | 10875000 | 0 | nofs | nofs |
| chr15 | C | 15p11 | . | 11125000 | 0 | nofs | nofs |
| chr15 | C | 15p11 | . | 11375000 | 0 | nofs | nofs |
| chr15 | C | 15p11 | . | 11625000 | 0 | nofs | nofs |
| chr15 | C | 15p11 | . | 11875000 | 0 | nofs | nofs |
| chr15 | C | 15p11 | . | 12125000 | 0 | nofs | nofs |
| chr15 | C | 15p11 | . | 12375000 | 0 | nofs | nofs |
| chr15 | C | 15p11 | . | 12625000 | 0 | nofs | nofs |
| chr15 | C | 15p11 | . | 12875000 | 0 | nofs | nofs |
| chr15 | C | 15p11 | . | 13125000 | 0 | nofs | nofs |
| chr15 | C | 15p11 | . | 13375000 | 0 | nofs | nofs |
| chr15 | C | 15p11 | . | 13625000 | 0 | nofs | nofs |
| chr15 | C | 15p11 | . | 13875000 | 0 | nofs | nofs |
| chr15 | C | 15p11 | . | 14125000 | 0 | nofs | nofs |
| chr15 | C | 15p11 | . | 14375000 | 0 | nofs | nofs |
| chr15 | C | 15p11 | . | 14625000 | 0 | nofs | nofs |
| chr15 | C | 15p11 | . | 14875000 | 0 | nofs | nofs |
| chr15 | C | 15p11 | . | 15125000 | 0 | nofs | nofs |
| chr15 | C | 15p11 | . | 15375000 | 0 | nofs | nofs |
| chr15 | C | 15p11 | . | 15625000 | 0 | nofs | nofs |

|       |   |   |          |       |      |      |
|-------|---|---|----------|-------|------|------|
| chr15 | C | . | 15875000 | 0     | nofs | nofs |
| chr15 | C | . | 16125000 | 0     | nofs | nofs |
| chr15 | C | . | 16375000 | 0     | nofs | nofs |
| chr15 | C | . | 16625000 | 0     | nofs | nofs |
| chr15 | C | . | 16875000 | 0     | nofs | nofs |
| chr15 | C | . | 17125000 | 0     | nofs | nofs |
| chr15 | C | . | 17375000 | 0     | nofs | nofs |
| chr15 | C | . | 17625000 | 0     | nofs | nofs |
| chr15 | C | . | 17875000 | 0     | nofs | nofs |
| chr15 | C | . | 18125000 | 0     | nofs | nofs |
| chr15 | C | 2 | 18375000 | 43081 | nofs | nofs |
| chr15 | C | 2 | 18625000 | 19324 | nofs | nofs |
| chr15 | C | 2 | 18875000 | 13468 | nofs | nofs |
| chr15 | C | 2 | 19125000 | 3809  | nofs | nofs |
| chr15 | C | 2 | 19375000 | 3386  | nofs | nofs |
| chr15 | C | 2 | 19625000 | 16408 | nofs | nofs |
| chr15 | C | 2 | 19875000 | 5752  | nofs | nofs |
| chr15 | C | 2 | 20125000 | 5746  | nofs | nofs |
| chr15 | C | 2 | 20375000 | 16050 | nofs | nofs |
| chr15 | C | 2 | 20625000 | 6450  | nofs | nofs |
| chr15 | C | 2 | 20875000 | 6555  | nofs | nofs |
| chr15 | C | 2 | 21125000 | 5172  | nofs | nofs |
| chr15 | C | 2 | 21375000 | 4312  | nofs | nofs |
| chr15 | E | 2 | 21625000 | 2647  | nofs | nofs |
| chr15 | E | 2 | 21875000 | 2766  | nofs | nofs |
| chr15 | E | 2 | 22125000 | 1955  | nofs | nofs |
| chr15 | E | 2 | 22375000 | 1828  | nofs | nofs |
| chr15 | E | 2 | 22625000 | 4560  | nofs | nofs |
| chr15 | E | 2 | 22875000 | 1660  | nofs | nofs |
| chr15 | E | 2 | 23125000 | 2160  | nofs | nofs |
| chr15 | E | 2 | 23375000 | 2331  | nofs | nofs |
| chr15 | E | 1 | 23625000 | 3871  | nofs | nofs |
| chr15 | E | 1 | 23875000 | 5083  | nofs | nofs |
| chr15 | E | 1 | 24125000 | 3270  | nofs | nofs |
| chr15 | E | 1 | 24375000 | 1981  | nofs | nofs |
| chr15 | E | 1 | 24625000 | 4050  | nofs | nofs |

|       |   |       |   |          |      |      |      |
|-------|---|-------|---|----------|------|------|------|
| chr15 | E | 15q12 | 1 | 24875000 | 2757 | nofs | nofs |
| chr15 | E | 15q12 | 1 | 25125000 | 4640 | nofs | nofs |
| chr15 | E | 15q12 | 1 | 25375000 | 4676 | nofs | nofs |
| chr15 | E | 15q12 | 1 | 25625000 | 4463 | nofs | nofs |
| chr15 | E | 15q12 | 1 | 25875000 | 4784 | nofs | nofs |
| chr15 | E | 15q13 | 7 | 26125000 | 7705 | nofs | nofs |
| chr15 | E | 15q13 | 7 | 26375000 | 5174 | nofs | nofs |
| chr15 | E | 15q13 | 7 | 26625000 | 7604 | nofs | nofs |
| chr15 | E | 15q13 | 7 | 26875000 | 3831 | nofs | nofs |
| chr15 | E | 15q13 | 7 | 27125000 | 3163 | nofs | nofs |
| chr15 | E | 15q13 | 7 | 27375000 | 2634 | nofs | nofs |
| chr15 | E | 15q13 | 7 | 27625000 | 4018 | nofs | nofs |
| chr15 | E | 15q13 | 7 | 27875000 | 1204 | nofs | nofs |
| chr15 | E | 15q13 | 7 | 28125000 | 5293 | nofs | nofs |
| chr15 | E | 15q13 | 7 | 28375000 | 3534 | nofs | nofs |
| chr15 | E | 15q13 | 7 | 28625000 | 5308 | nofs | nofs |
| chr15 | E | 15q13 | 7 | 28875000 | 6737 | nofs | nofs |
| chr15 | E | 15q13 | 7 | 29125000 | 3853 | nofs | nofs |
| chr15 | E | 15q13 | 7 | 29375000 | 3809 | nofs | nofs |
| chr15 | E | 15q13 | 7 | 29625000 | 3057 | nofs | nofs |
| chr15 | E | 15q13 | 7 | 29875000 | 2159 | nofs | nofs |
| chr15 | E | 15q13 | 7 | 30125000 | 2968 | nofs | nofs |
| chr15 | E | 15q13 | 7 | 30375000 | 2659 | nofs | nofs |
| chr15 | E | 15q13 | 7 | 30625000 | 5229 | nofs | nofs |
| chr15 | E | 15q13 | 7 | 30875000 | 2257 | nofs | nofs |
| chr15 | E | 15q13 | 7 | 31125000 | 2049 | nofs | nofs |
| chr15 | E | 15q13 | 7 | 31375000 | 2584 | nofs | nofs |
| chr15 | E | 15q14 | 1 | 31625000 | 1104 | nofs | nofs |
| chr15 | E | 15q14 | 1 | 31875000 | 2519 | nofs | nofs |
| chr15 | E | 15q14 | 1 | 32125000 | 3482 | nofs | nofs |
| chr15 | E | 15q14 | 1 | 32375000 | 3441 | nofs | nofs |
| chr15 | E | 15q14 | 1 | 32625000 | 2764 | nofs | nofs |
| chr15 | E | 15q14 | 1 | 32875000 | 1956 | nofs | nofs |
| chr15 | E | 15q14 | 1 | 33125000 | 4955 | nofs | nofs |
| chr15 | E | 15q14 | 1 | 33375000 | 2800 | nofs | nofs |
| chr15 | E | 15q14 | 1 | 33625000 | 3332 | nofs | nofs |

|       |   |         |   |          |      |      |      |
|-------|---|---------|---|----------|------|------|------|
| chr15 | E | 15q14   | 1 | 33875000 | 1905 | nofs | nofs |
| chr15 | E | 15q14   | 1 | 34125000 | 1157 | nofs | nofs |
| chr15 | E | 15q14   | 1 | 34375000 | 2015 | nofs | nofs |
| chr15 | E | 15q14   | 1 | 34625000 | 2185 | nofs | nofs |
| chr15 | E | 15q14   | 1 | 34875000 | 1837 | nofs | nofs |
| chr15 | E | 15q14   | 1 | 35125000 | 2635 | nofs | nofs |
| chr15 | E | 15q14   | 1 | 35375000 | 2436 | nofs | nofs |
| chr15 | E | 15q14   | 1 | 35625000 | 2023 | nofs | nofs |
| chr15 | E | 15q14   | 1 | 35875000 | 1917 | nofs | nofs |
| chr15 | E | 15q14   | 1 | 36125000 | 2451 | nofs | nofs |
| chr15 | E | 15q14   | 1 | 36375000 | 1464 | nofs | nofs |
| chr15 | E | 15q14   | 1 | 36625000 | 1497 | nofs | nofs |
| chr15 | E | 15q14   | 1 | 36875000 | 1606 | nofs | nofs |
| chr15 | E | 15q14   | 1 | 37125000 | 2140 | nofs | nofs |
| chr15 | E | 15q14   | 1 | 37375000 | 1988 | nofs | nofs |
| chr15 | E | 15q14   | 1 | 37625000 | 1227 | nofs | nofs |
| chr15 | E | 15q14   | 1 | 37875000 | 3214 | nofs | nofs |
| chr15 | E | 15q15   | 2 | 38125000 | 7100 | nofs | nofs |
| chr15 | E | 15q15   | 2 | 38375000 | 1872 | nofs | nofs |
| chr15 | E | 15q15   | 2 | 38625000 | 2820 | nofs | nofs |
| chr15 | E | 15q15   | 2 | 38875000 | 4964 | nofs | nofs |
| chr15 | E | 15q15   | 2 | 39125000 | 3826 | nofs | nofs |
| chr15 | E | 15q15   | 2 | 39375000 | 7869 | nofs | nofs |
| chr15 | E | 15q15   | 2 | 39625000 | 5403 | nofs | nofs |
| chr15 | E | 15q15   | 2 | 39875000 | 2959 | nofs | nofs |
| chr15 | E | 15q15   | 2 | 40125000 | 2687 | nofs | nofs |
| chr15 | E | 15q15   | 2 | 40375000 | 2091 | nofs | nofs |
| chr15 | E | 15q15   | 2 | 40625000 | 2943 | nofs | nofs |
| chr15 | E | 15q15   | 2 | 40875000 | 2886 | nofs | nofs |
| chr15 | E | 15q15   | 2 | 41125000 | 5091 | nofs | nofs |
| chr15 | E | 15q15   | 2 | 41375000 | 2262 | nofs | nofs |
| chr15 | E | 15q15   | 2 | 41625000 | 3333 | nofs | nofs |
| chr15 | E | 15q15   | 2 | 41875000 | 3864 | nofs | nofs |
| chr15 | E | 15q15   | 2 | 42125000 | 3559 | nofs | nofs |
| chr15 | E | 15q15   | 2 | 42375000 | 3846 | nofs | nofs |
| chr15 | E | 15q21.1 | 2 | 42625000 | 1831 | nofs | nofs |

|       |   |         |   |          |      |      |      |
|-------|---|---------|---|----------|------|------|------|
| chr15 | E | 15q21.1 | 2 | 42875000 | 2775 | nofs | nofs |
| chr15 | E | 15q21.1 | 2 | 43125000 | 2665 | nofs | nofs |
| chr15 | E | 15q21.1 | 2 | 43375000 | 2937 | nofs | nofs |
| chr15 | E | 15q21.1 | 2 | 43625000 | 5891 | nofs | nofs |
| chr15 | E | 15q21.1 | 2 | 43875000 | 3315 | nofs | nofs |
| chr15 | E | 15q21.1 | 2 | 44125000 | 3135 | nofs | nofs |
| chr15 | E | 15q21.1 | 2 | 44375000 | 1117 | nofs | nofs |
| chr15 | E | 15q21.1 | 2 | 44625000 | 1706 | nofs | nofs |
| chr15 | E | 15q21.1 | 2 | 44875000 | 1311 | nofs | nofs |
| chr15 | E | 15q21.1 | 2 | 45125000 | 4125 | nofs | nofs |
| chr15 | E | 15q21.1 | 2 | 45375000 | 2309 | nofs | nofs |
| chr15 | E | 15q21.1 | 2 | 45625000 | 1788 | nofs | nofs |
| chr15 | E | 15q21.1 | 2 | 45875000 | 1396 | nofs | nofs |
| chr15 | E | 15q21.1 | 2 | 46125000 | 2318 | nofs | nofs |
| chr15 | E | 15q21.1 | 2 | 46375000 | 1986 | nofs | nofs |
| chr15 | E | 15q21.1 | 2 | 46625000 | 2397 | nofs | nofs |
| chr15 | E | 15q21.1 | 2 | 46875000 | 1737 | nofs | nofs |
| chr15 | E | 15q21.1 | 2 | 47125000 | 2255 | nofs | nofs |
| chr15 | E | 15q21.1 | 2 | 47375000 | 3207 | nofs | nofs |
| chr15 | E | 15q21.1 | 2 | 47625000 | 2640 | nofs | nofs |
| chr15 | B | 15q21.2 | . | 47875000 | 1788 | nofs | nofs |
| chr15 | B | 15q21.2 | . | 48125000 | 3754 | nofs | nofs |
| chr15 | B | 15q21.2 | . | 48375000 | 3135 | nofs | nofs |
| chr15 | B | 15q21.2 | . | 48625000 | 3306 | nofs | nofs |
| chr15 | B | 15q21.2 | . | 48875000 | 4967 | nofs | nofs |
| chr15 | B | 15q21.2 | . | 49125000 | 1174 | nofs | nofs |
| chr15 | B | 15q21.2 | . | 49375000 | 2591 | nofs | nofs |
| chr15 | B | 15q21.2 | . | 49625000 | 2394 | nofs | nofs |
| chr15 | B | 15q21.2 | . | 49875000 | 3064 | nofs | nofs |
| chr15 | B | 15q21.2 | . | 50125000 | 3568 | nofs | nofs |
| chr15 | B | 15q21.2 | . | 50375000 | 2449 | nofs | nofs |
| chr15 | B | 15q21.2 | . | 50625000 | 2701 | nofs | nofs |
| chr15 | B | 15q21.2 | . | 50875000 | 1961 | nofs | nofs |
| chr15 | B | 15q21.3 | . | 51125000 | 2747 | nofs | nofs |
| chr15 | B | 15q21.3 | . | 51375000 | 1875 | nofs | nofs |
| chr15 | B | 15q21.3 | . | 51625000 | 1600 | nofs | nofs |

|       |   |         |   |          |      |      |           |
|-------|---|---------|---|----------|------|------|-----------|
| chr15 | B | 15q21.3 | . | 51875000 | 1317 | nofs | nofs      |
| chr15 | B | 15q21.3 | . | 52125000 | 1684 | nofs | nofs      |
| chr15 | B | 15q21.3 | . | 52375000 | 1409 | nofs | nofs      |
| chr15 | B | 15q21.3 | . | 52625000 | 3593 | nofs | nofs      |
| chr15 | B | 15q21.3 | . | 52875000 | 1984 | nofs | nofs      |
| chr15 | B | 15q21.3 | . | 53125000 | 2060 | nofs | nofs      |
| chr15 | B | 15q21.3 | . | 53375000 | 3761 | nofs | nofs      |
| chr15 | B | 15q21.3 | . | 53625000 | 6184 | nofs | nofs      |
| chr15 | B | 15q21.3 | . | 53875000 | 2090 | nofs | nofs      |
| chr15 | B | 15q21.3 | . | 54125000 | 4135 | nofs | nofs      |
| chr15 | B | 15q21.3 | . | 54375000 | 1705 | nofs | nofs      |
| chr15 | B | 15q21.3 | . | 54625000 | 2529 | nofs | nofs      |
| chr15 | B | 15q21.3 | . | 54875000 | 2178 | nofs | nofs      |
| chr15 | B | 15q21.3 | . | 55125000 | 2872 | nofs | nofs      |
| chr15 | B | 15q21.3 | . | 55375000 | 4332 | nofs | nofs      |
| chr15 | B | 15q21.3 | . | 55625000 | 1361 | nofs | nofs      |
| chr15 | B | 15q21.3 | . | 55875000 | 4605 | nofs | nofs      |
| chr15 | B | 15q21.3 | . | 56125000 | 1089 | nofs | nofs      |
| chr15 | B | 15q21.3 | . | 56375000 | 2452 | nofs | nofs      |
| chr15 | B | 15q21.3 | . | 56625000 | 2639 | nofs | nofs      |
| chr15 | B | 15q21.3 | . | 56875000 | 3308 | nofs | nofs      |
| chr15 | B | 15q22.1 | . | 57125000 | 3220 | fs   | fs common |
| chr15 | B | 15q22.2 | . | 57375000 | 2892 | fs   | fs common |
| chr15 | B | 15q22.2 | . | 57625000 | 4901 | fs   | fs common |
| chr15 | B | 15q22.2 | . | 57875000 | 3498 | fs   | fs common |
| chr15 | B | 15q22.2 | . | 58125000 | 2385 | fs   | fs common |
| chr15 | B | 15q22.2 | . | 58375000 | 3526 | fs   | fs common |
| chr15 | B | 15q22.2 | . | 58625000 | 2417 | fs   | fs common |
| chr15 | B | 15q22.2 | . | 58875000 | 2375 | fs   | fs common |
| chr15 | B | 15q22.2 | . | 59125000 | 3410 | fs   | fs common |
| chr15 | B | 15q22.2 | . | 59375000 | 1431 | fs   | fs common |
| chr15 | B | 15q22.2 | . | 59625000 | 1595 | fs   | fs common |
| chr15 | B | 15q22.2 | . | 59875000 | 2051 | fs   | fs common |
| chr15 | B | 15q22.2 | . | 60125000 | 1950 | fs   | fs common |
| chr15 | B | 15q22.2 | . | 60375000 | 4131 | fs   | fs common |
| chr15 | B | 15q22.2 | . | 60625000 | 2196 | fs   | fs common |

|       |   |         |   |          |      |      |           |
|-------|---|---------|---|----------|------|------|-----------|
| chr15 | B | 15q22.2 | . | 60875000 | 2442 | fs   | fs common |
| chr15 | B | 15q22.2 | . | 61125000 | 2366 | fs   | fs common |
| chr15 | E | 15q22.3 | 2 | 61375000 | 2331 | fs   | fs common |
| chr15 | E | 15q22.3 | 2 | 61625000 | 1627 | fs   | fs common |
| chr15 | E | 15q22.3 | 2 | 61875000 | 1612 | fs   | fs common |
| chr15 | E | 15q22.3 | 2 | 62125000 | 2047 | fs   | fs common |
| chr15 | E | 15q22.3 | 2 | 62375000 | 3901 | fs   | fs common |
| chr15 | E | 15q22.3 | 2 | 62625000 | 3284 | fs   | fs common |
| chr15 | E | 15q22.3 | 2 | 62875000 | 4013 | fs   | fs common |
| chr15 | E | 15q22.3 | 2 | 63125000 | 6969 | fs   | fs common |
| chr15 | E | 15q22.3 | 2 | 63375000 | 2467 | fs   | fs common |
| chr15 | E | 15q22.3 | 2 | 63625000 | 3803 | fs   | fs common |
| chr15 | E | 15q22.3 | 2 | 63875000 | 3693 | fs   | fs common |
| chr15 | E | 15q22.3 | 2 | 64125000 | 2532 | fs   | fs common |
| chr15 | E | 15q22.3 | 2 | 64375000 | 3270 | fs   | fs common |
| chr15 | E | 15q22.3 | 2 | 64625000 | 4110 | fs   | fs common |
| chr15 | E | 15q22.3 | 2 | 64875000 | 1869 | fs   | fs common |
| chr15 | E | 15q22.3 | 2 | 65125000 | 3736 | fs   | fs common |
| chr15 | E | 15q22.3 | 2 | 65375000 | 2595 | fs   | fs common |
| chr15 | E | 15q23   | 3 | 65625000 | 2156 | nofs | nofs      |
| chr15 | E | 15q23   | 3 | 65875000 | 1929 | nofs | nofs      |
| chr15 | E | 15q23   | 3 | 66125000 | 4179 | nofs | nofs      |
| chr15 | E | 15q23   | 3 | 66375000 | 6893 | nofs | nofs      |
| chr15 | E | 15q23   | 3 | 66625000 | 2328 | nofs | nofs      |
| chr15 | E | 15q23   | 3 | 66875000 | 5033 | nofs | nofs      |
| chr15 | E | 15q23   | 3 | 67125000 | 3531 | nofs | nofs      |
| chr15 | E | 15q23   | 3 | 67375000 | 5382 | nofs | nofs      |
| chr15 | E | 15q23   | 3 | 67625000 | 2461 | nofs | nofs      |
| chr15 | E | 15q23   | 3 | 67875000 | 2255 | nofs | nofs      |
| chr15 | E | 15q23   | 3 | 68125000 | 3124 | nofs | nofs      |
| chr15 | E | 15q23   | 3 | 68375000 | 4567 | nofs | nofs      |
| chr15 | E | 15q23   | 3 | 68625000 | 6040 | nofs | nofs      |
| chr15 | E | 15q23   | 3 | 68875000 | 4177 | nofs | nofs      |
| chr15 | E | 15q23   | 3 | 69125000 | 2095 | nofs | nofs      |
| chr15 | E | 15q23   | 3 | 69375000 | 2565 | nofs | nofs      |
| chr15 | E | 15q23   | 3 | 69625000 | 2873 | nofs | nofs      |

|       |   |       |   |          |      |      |      |
|-------|---|-------|---|----------|------|------|------|
| chr15 | E | 15q23 | 3 | 69875000 | 4744 | nofs | nofs |
| chr15 | E | 15q23 | 3 | 70125000 | 7398 | nofs | nofs |
| chr15 | E | 15q23 | 3 | 70375000 | 3057 | nofs | nofs |
| chr15 | E | 15q24 | 6 | 70625000 | 2517 | nofs | nofs |
| chr15 | E | 15q24 | 6 | 70875000 | 3811 | nofs | nofs |
| chr15 | E | 15q24 | 6 | 71125000 | 1761 | nofs | nofs |
| chr15 | E | 15q24 | 6 | 71375000 | 3796 | nofs | nofs |
| chr15 | E | 15q24 | 6 | 71625000 | 2431 | nofs | nofs |
| chr15 | E | 15q24 | 6 | 71875000 | 2608 | nofs | nofs |
| chr15 | E | 15q24 | 6 | 72125000 | 4079 | nofs | nofs |
| chr15 | E | 15q24 | 6 | 72375000 | 2946 | nofs | nofs |
| chr15 | E | 15q24 | 6 | 72625000 | 3427 | nofs | nofs |
| chr15 | E | 15q24 | 6 | 72875000 | 7491 | nofs | nofs |
| chr15 | E | 15q24 | 6 | 73125000 | 5046 | nofs | nofs |
| chr15 | E | 15q24 | 6 | 73375000 | 3037 | nofs | nofs |
| chr15 | E | 15q24 | 6 | 73625000 | 6065 | nofs | nofs |
| chr15 | E | 15q24 | 6 | 73875000 | 2122 | nofs | nofs |
| chr15 | E | 15q24 | 6 | 74125000 | 2185 | nofs | nofs |
| chr15 | E | 15q24 | 6 | 74375000 | 2159 | nofs | nofs |
| chr15 | E | 15q24 | 6 | 74625000 | 2150 | nofs | nofs |
| chr15 | E | 15q24 | 6 | 74875000 | 1668 | nofs | nofs |
| chr15 | E | 15q24 | 6 | 75125000 | 3090 | nofs | nofs |
| chr15 | E | 15q24 | 6 | 75375000 | 1944 | nofs | nofs |
| chr15 | E | 15q24 | 6 | 75625000 | 5208 | nofs | nofs |
| chr15 | E | 15q24 | 6 | 75875000 | 4053 | nofs | nofs |
| chr15 | E | 15q25 | 7 | 76125000 | 3756 | nofs | nofs |
| chr15 | E | 15q25 | 7 | 76375000 | 2803 | nofs | nofs |
| chr15 | E | 15q25 | 7 | 76625000 | 1952 | nofs | nofs |
| chr15 | E | 15q25 | 7 | 76875000 | 2384 | nofs | nofs |
| chr15 | E | 15q25 | 7 | 77125000 | 5247 | nofs | nofs |
| chr15 | E | 15q25 | 7 | 77375000 | 2963 | nofs | nofs |
| chr15 | E | 15q25 | 7 | 77625000 | 4816 | nofs | nofs |
| chr15 | E | 15q25 | 7 | 77875000 | 2680 | nofs | nofs |
| chr15 | E | 15q25 | 7 | 78125000 | 4350 | nofs | nofs |
| chr15 | E | 15q25 | 7 | 78375000 | 2072 | nofs | nofs |
| chr15 | E | 15q25 | 7 | 78625000 | 3230 | nofs | nofs |



|       |   |         |   |          |      |      |      |
|-------|---|---------|---|----------|------|------|------|
| chr15 | E | 15q25   | 7 | 78875000 | 2764 | nofs | nofs |
| chr15 | E | 15q25   | 7 | 79125000 | 2665 | nofs | nofs |
| chr15 | E | 15q25   | 7 | 79375000 | 3886 | nofs | nofs |
| chr15 | E | 15q25   | 7 | 79625000 | 2920 | nofs | nofs |
| chr15 | E | 15q25   | 7 | 79875000 | 4784 | nofs | nofs |
| chr15 | E | 15q25   | 7 | 80125000 | 2156 | nofs | nofs |
| chr15 | E | 15q25   | 7 | 80375000 | 3228 | nofs | nofs |
| chr15 | E | 15q25   | 7 | 80625000 | 5442 | nofs | nofs |
| chr15 | E | 15q25   | 7 | 80875000 | 5799 | nofs | nofs |
| chr15 | E | 15q25   | 7 | 81125000 | 3161 | nofs | nofs |
| chr15 | E | 15q25   | 7 | 81375000 | 3187 | nofs | nofs |
| chr15 | E | 15q25   | 7 | 81625000 | 4495 | nofs | nofs |
| chr15 | E | 15q25   | 7 | 81875000 | 2112 | nofs | nofs |
| chr15 | E | 15q25   | 7 | 82125000 | 2258 | nofs | nofs |
| chr15 | E | 15q25   | 7 | 82375000 | 2964 | nofs | nofs |
| chr15 | E | 15q25   | 7 | 82625000 | 3144 | nofs | nofs |
| chr15 | E | 15q25   | 7 | 82875000 | 3206 | nofs | nofs |
| chr15 | E | 15q25   | 7 | 83125000 | 3444 | nofs | nofs |
| chr15 | E | 15q25   | 7 | 83375000 | 1853 | nofs | nofs |
| chr15 | E | 15q25   | 7 | 83625000 | 4518 | nofs | nofs |
| chr15 | E | 15q25   | 7 | 83875000 | 2228 | nofs | nofs |
| chr15 | E | 15q25   | 7 | 84125000 | 4162 | nofs | nofs |
| chr15 | E | 15q25   | 7 | 84375000 | 2467 | nofs | nofs |
| chr15 | E | 15q25   | 7 | 84625000 | 2443 | nofs | nofs |
| chr15 | E | 15q25   | 7 | 84875000 | 1712 | nofs | nofs |
| chr15 | E | 15q25   | 7 | 85125000 | 2559 | nofs | nofs |
| chr15 | E | 15q25   | 7 | 85375000 | 3739 | nofs | nofs |
| chr15 | E | 15q25   | 7 | 85625000 | 2114 | nofs | nofs |
| chr15 | E | 15q25   | 7 | 85875000 | 2264 | nofs | nofs |
| chr15 | E | 15q25   | 7 | 86125000 | 2357 | nofs | nofs |
| chr15 | E | 15q25   | 7 | 86375000 | 1826 | nofs | nofs |
| chr15 | E | 15q25   | 7 | 86625000 | 2898 | nofs | nofs |
| chr15 | E | 15q25   | 7 | 86875000 | 4263 | nofs | nofs |
| chr15 | E | 15q26.1 | 5 | 87125000 | 5322 | nofs | nofs |
| chr15 | E | 15q26.1 | 5 | 87375000 | 4517 | nofs | nofs |
| chr15 | E | 15q26.1 | 5 | 87625000 | 3045 | nofs | nofs |

|       |   |         |   |          |      |      |      |
|-------|---|---------|---|----------|------|------|------|
| chr15 | E | 15q26.1 | 5 | 87875000 | 6158 | nofs | nofs |
| chr15 | E | 15q26.1 | 5 | 88125000 | 8359 | nofs | nofs |
| chr15 | E | 15q26.1 | 5 | 88375000 | 3816 | nofs | nofs |
| chr15 | E | 15q26.1 | 5 | 88625000 | 4143 | nofs | nofs |
| chr15 | E | 15q26.1 | 5 | 88875000 | 4106 | nofs | nofs |
| chr15 | E | 15q26.1 | 5 | 89125000 | 4830 | nofs | nofs |
| chr15 | E | 15q26.1 | 5 | 89375000 | 3879 | nofs | nofs |
| chr15 | E | 15q26.1 | 5 | 89625000 | 3560 | nofs | nofs |
| chr15 | E | 15q26.1 | 5 | 89875000 | 1849 | nofs | nofs |
| chr15 | E | 15q26.1 | 5 | 90125000 | 4868 | nofs | nofs |
| chr15 | E | 15q26.1 | 5 | 90375000 | 2309 | nofs | nofs |
| chr15 | E | 15q26.1 | 5 | 90625000 | 2624 | nofs | nofs |
| chr15 | E | 15q26.1 | 5 | 90875000 | 2984 | nofs | nofs |
| chr15 | E | 15q26.1 | 5 | 91125000 | 4460 | nofs | nofs |
| chr15 | E | 15q26.1 | 5 | 91375000 | 2162 | nofs | nofs |
| chr15 | E | 15q26.1 | 5 | 91625000 | 5374 | nofs | nofs |
| chr15 | E | 15q26.1 | 5 | 91875000 | 2678 | nofs | nofs |
| chr15 | E | 15q26.1 | 5 | 92125000 | 2893 | nofs | nofs |
| chr15 | B | 15q26.2 | . | 92375000 | 4496 | nofs | nofs |
| chr15 | B | 15q26.2 | . | 92625000 | 5477 | nofs | nofs |
| chr15 | B | 15q26.2 | . | 92875000 | 1470 | nofs | nofs |
| chr15 | B | 15q26.2 | . | 93125000 | 2347 | nofs | nofs |
| chr15 | B | 15q26.2 | . | 93375000 | 2638 | nofs | nofs |
| chr15 | B | 15q26.2 | . | 93625000 | 3589 | nofs | nofs |
| chr15 | B | 15q26.2 | . | 93875000 | 2387 | nofs | nofs |
| chr15 | B | 15q26.2 | . | 94125000 | 2831 | nofs | nofs |
| chr15 | B | 15q26.2 | . | 94375000 | 2749 | nofs | nofs |
| chr15 | B | 15q26.2 | . | 94625000 | 2102 | nofs | nofs |
| chr15 | B | 15q26.2 | . | 94875000 | 2591 | nofs | nofs |
| chr15 | B | 15q26.2 | . | 95125000 | 3520 | nofs | nofs |
| chr15 | B | 15q26.2 | . | 95375000 | 3156 | nofs | nofs |
| chr15 | B | 15q26.2 | . | 95625000 | 2463 | nofs | nofs |
| chr15 | B | 15q26.2 | . | 95875000 | 3089 | nofs | nofs |
| chr15 | B | 15q26.2 | . | 96125000 | 3206 | nofs | nofs |
| chr15 | E | 15q26.3 | 2 | 96375000 | 2640 | nofs | nofs |
| chr15 | E | 15q26.3 | 2 | 96625000 | 2668 | nofs | nofs |

|       |   |         |   |           |       |      |      |
|-------|---|---------|---|-----------|-------|------|------|
| chr15 | E | 15q26.3 | 2 | 96875000  | 4957  | nofs | nofs |
| chr15 | T | 15q26.3 | 2 | 97125000  | 1854  | nofs | nofs |
| chr15 | T | 15q26.3 | 2 | 97375000  | 2334  | nofs | nofs |
| chr15 | T | 15q26.3 | 2 | 97625000  | 1498  | nofs | nofs |
| chr15 | T | 15q26.3 | 2 | 97875000  | 2848  | nofs | nofs |
| chr15 | T | 15q26.3 | 2 | 98125000  | 3082  | nofs | nofs |
| chr15 | T | 15q26.3 | 2 | 98375000  | 4639  | nofs | nofs |
| chr15 | T | 15q26.3 | 2 | 98625000  | 5457  | nofs | nofs |
| chr15 | T | 15q26.3 | 2 | 98875000  | 9418  | nofs | nofs |
| chr15 | T | 15q26.3 | 2 | 99125000  | 5263  | nofs | nofs |
| chr15 | T | 15q26.3 | 2 | 99375000  | 5963  | nofs | nofs |
| chr15 | T | 15q26.3 | 2 | 99625000  | 4564  | nofs | nofs |
| chr15 | T | 15q26.3 | 2 | 99875000  | 3056  | nofs | nofs |
| chr15 | T | 15q26.3 | 2 | 100000000 | 17056 | nofs | nofs |
| chr16 | T | 16p13.3 | 2 | 125000    | 9150  | nofs | nofs |
| chr16 | T | 16p13.3 | 2 | 375000    | 17512 | nofs | nofs |
| chr16 | T | 16p13.3 | 2 | 625000    | 18581 | nofs | nofs |
| chr16 | T | 16p13.3 | 2 | 875000    | 32188 | nofs | nofs |
| chr16 | T | 16p13.3 | 2 | 1125000   | 16849 | nofs | nofs |
| chr16 | T | 16p13.3 | 2 | 1375000   | 13854 | nofs | nofs |
| chr16 | T | 16p13.3 | 2 | 1625000   | 13694 | nofs | nofs |
| chr16 | T | 16p13.3 | 2 | 1875000   | 6380  | nofs | nofs |
| chr16 | T | 16p13.3 | 2 | 2125000   | 7767  | nofs | nofs |
| chr16 | T | 16p13.3 | 2 | 2375000   | 6408  | nofs | nofs |
| chr16 | T | 16p13.3 | 2 | 2625000   | 2479  | nofs | nofs |
| chr16 | T | 16p13.3 | 2 | 2875000   | 7316  | nofs | nofs |
| chr16 | T | 16p13.3 | 2 | 3125000   | 8932  | nofs | nofs |
| chr16 | E | 16p13.3 | 2 | 3375000   | 3383  | nofs | nofs |
| chr16 | E | 16p13.3 | 2 | 3625000   | 4968  | nofs | nofs |
| chr16 | E | 16p13.3 | 2 | 3875000   | 4481  | nofs | nofs |
| chr16 | E | 16p13.3 | 2 | 4125000   | 6884  | nofs | nofs |
| chr16 | E | 16p13.3 | 2 | 4375000   | 5349  | nofs | nofs |
| chr16 | E | 16p13.3 | 2 | 4625000   | 6725  | nofs | nofs |
| chr16 | E | 16p13.3 | 2 | 4875000   | 6097  | nofs | nofs |
| chr16 | E | 16p13.3 | 2 | 5125000   | 4720  | nofs | nofs |
| chr16 | E | 16p13.3 | 2 | 5375000   | 3836  | nofs | nofs |

|       |   |         |   |          |       |      |      |
|-------|---|---------|---|----------|-------|------|------|
| chr16 | E | 16p13.3 | 2 | 5625000  | 5202  | nofs | nofs |
| chr16 | E | 16p13.3 | 2 | 5875000  | 4900  | nofs | nofs |
| chr16 | E | 16p13.3 | 2 | 6125000  | 4759  | nofs | nofs |
| chr16 | E | 16p13.3 | 2 | 6375000  | 5671  | nofs | nofs |
| chr16 | B | 16p13.2 | . | 6625000  | 5868  | nofs | nofs |
| chr16 | B | 16p13.2 | . | 6875000  | 6937  | nofs | nofs |
| chr16 | B | 16p13.2 | . | 7125000  | 4897  | nofs | nofs |
| chr16 | B | 16p13.2 | . | 7375000  | 5096  | nofs | nofs |
| chr16 | B | 16p13.2 | . | 7625000  | 2070  | nofs | nofs |
| chr16 | B | 16p13.2 | . | 7875000  | 3950  | nofs | nofs |
| chr16 | B | 16p13.2 | . | 8125000  | 3561  | nofs | nofs |
| chr16 | B | 16p13.2 | . | 8375000  | 4101  | nofs | nofs |
| chr16 | B | 16p13.2 | . | 8625000  | 7637  | nofs | nofs |
| chr16 | B | 16p13.2 | . | 8875000  | 4241  | nofs | nofs |
| chr16 | B | 16p13.2 | . | 9125000  | 5232  | nofs | nofs |
| chr16 | B | 16p13.2 | . | 9375000  | 7068  | nofs | nofs |
| chr16 | B | 16p13.2 | . | 9625000  | 4402  | nofs | nofs |
| chr16 | B | 16p13.2 | . | 9875000  | 3571  | nofs | nofs |
| chr16 | B | 16p13.2 | . | 10125000 | 2970  | nofs | nofs |
| chr16 | E | 16p13.1 | 3 | 10375000 | 4276  | nofs | nofs |
| chr16 | E | 16p13.1 | 3 | 10625000 | 18419 | nofs | nofs |
| chr16 | E | 16p13.1 | 3 | 10875000 | 4097  | nofs | nofs |
| chr16 | E | 16p13.1 | 3 | 11125000 | 2385  | nofs | nofs |
| chr16 | E | 16p13.1 | 3 | 11375000 | 4968  | nofs | nofs |
| chr16 | E | 16p13.1 | 3 | 11625000 | 4203  | nofs | nofs |
| chr16 | E | 16p13.1 | 3 | 11875000 | 5827  | nofs | nofs |
| chr16 | E | 16p13.1 | 3 | 12125000 | 4368  | nofs | nofs |
| chr16 | E | 16p13.1 | 3 | 12375000 | 7392  | nofs | nofs |
| chr16 | E | 16p13.1 | 3 | 12625000 | 1970  | nofs | nofs |
| chr16 | E | 16p13.1 | 3 | 12875000 | 4182  | nofs | nofs |
| chr16 | E | 16p13.1 | 3 | 13125000 | 4906  | nofs | nofs |
| chr16 | E | 16p13.1 | 3 | 13375000 | 3668  | nofs | nofs |
| chr16 | E | 16p13.1 | 3 | 13625000 | 3034  | nofs | nofs |
| chr16 | E | 16p13.1 | 3 | 13875000 | 4993  | nofs | nofs |
| chr16 | E | 16p13.1 | 3 | 14125000 | 2315  | nofs | nofs |
| chr16 | E | 16p13.1 | 3 | 14375000 | 4262  | nofs | nofs |

|       |   |         |   |          |       |         |         |
|-------|---|---------|---|----------|-------|---------|---------|
| chr16 | E | 16p13.1 | 3 | 14625000 | 5393  | nofs    | nofs    |
| chr16 | E | 16p13.1 | 3 | 14875000 | 8326  | fs rare | fs rare |
| chr16 | E | 16p13.1 | 3 | 15125000 | 5022  | fs rare | fs rare |
| chr16 | E | 16p13.1 | 3 | 15375000 | 5611  | fs rare | fs rare |
| chr16 | E | 16p13.1 | 3 | 15625000 | 3896  | fs rare | fs rare |
| chr16 | E | 16p13.1 | 3 | 15875000 | 5873  | fs rare | fs rare |
| chr16 | E | 16p13.1 | 3 | 16125000 | 10450 | fs rare | fs rare |
| chr16 | E | 16p13.1 | 3 | 16375000 | 6738  | fs rare | fs rare |
| chr16 | E | 16p13.1 | 3 | 16625000 | 4968  | fs rare | fs rare |
| chr16 | E | 16p13.1 | 3 | 16875000 | 4980  | fs rare | fs rare |
| chr16 | E | 16p12   | 1 | 17125000 | 5337  | nofs    | nofs    |
| chr16 | E | 16p12   | 1 | 17375000 | 2723  | nofs    | nofs    |
| chr16 | E | 16p12   | 1 | 17625000 | 4779  | nofs    | nofs    |
| chr16 | E | 16p12   | 1 | 17875000 | 2953  | nofs    | nofs    |
| chr16 | E | 16p12   | 1 | 18125000 | 4761  | nofs    | nofs    |
| chr16 | E | 16p12   | 1 | 18375000 | 10070 | nofs    | nofs    |
| chr16 | E | 16p12   | 1 | 18625000 | 4615  | nofs    | nofs    |
| chr16 | E | 16p12   | 1 | 18875000 | 4580  | nofs    | nofs    |
| chr16 | E | 16p12   | 1 | 19125000 | 3665  | nofs    | nofs    |
| chr16 | E | 16p12   | 1 | 19375000 | 5317  | nofs    | nofs    |
| chr16 | E | 16p12   | 1 | 19625000 | 2756  | nofs    | nofs    |
| chr16 | E | 16p12   | 1 | 19875000 | 3496  | nofs    | nofs    |
| chr16 | E | 16p12   | 1 | 20125000 | 3703  | nofs    | nofs    |
| chr16 | E | 16p12   | 1 | 20375000 | 5126  | nofs    | nofs    |
| chr16 | E | 16p12   | 1 | 20625000 | 4504  | nofs    | nofs    |
| chr16 | E | 16p12   | 1 | 20875000 | 3473  | nofs    | nofs    |
| chr16 | E | 16p12   | 1 | 21125000 | 3513  | nofs    | nofs    |
| chr16 | E | 16p12   | 1 | 21375000 | 9473  | nofs    | nofs    |
| chr16 | E | 16p12   | 1 | 21625000 | 4084  | nofs    | nofs    |
| chr16 | E | 16p12   | 1 | 21875000 | 5239  | fs rare | fs rare |
| chr16 | E | 16p12   | 1 | 22125000 | 4502  | fs rare | fs rare |
| chr16 | E | 16p12   | 1 | 22375000 | 6261  | fs rare | fs rare |
| chr16 | E | 16p12   | 1 | 22625000 | 5042  | fs rare | fs rare |
| chr16 | E | 16p12   | 1 | 22875000 | 4161  | fs rare | fs rare |
| chr16 | E | 16p12   | 1 | 23125000 | 6191  | fs rare | fs rare |
| chr16 | E | 16p12   | 1 | 23375000 | 5633  | fs rare | fs rare |

|       |   |         |   |          |       |      |         |
|-------|---|---------|---|----------|-------|------|---------|
| chr16 | E | 16p12   | 1 | 23625000 | 5490  | fs   | fs rare |
| chr16 | E | 16p12   | 1 | 23875000 | 5980  | fs   | fs rare |
| chr16 | E | 16p12   | 1 | 24125000 | 5577  | fs   | fs rare |
| chr16 | E | 16p12   | 1 | 24375000 | 3985  | fs   | fs rare |
| chr16 | E | 16p12   | 1 | 24625000 | 4153  | fs   | fs rare |
| chr16 | E | 16p12   | 1 | 24875000 | 5697  | fs   | fs rare |
| chr16 | E | 16p12   | 1 | 25125000 | 2886  | fs   | fs rare |
| chr16 | E | 16p12   | 1 | 25375000 | 2339  | fs   | fs rare |
| chr16 | E | 16p12   | 1 | 25625000 | 4422  | fs   | fs rare |
| chr16 | E | 16p12   | 1 | 25875000 | 5220  | fs   | fs rare |
| chr16 | E | 16p12   | 1 | 26125000 | 4683  | fs   | fs rare |
| chr16 | E | 16p12   | 1 | 26375000 | 3941  | fs   | fs rare |
| chr16 | E | 16p12   | 1 | 26625000 | 7682  | fs   | fs rare |
| chr16 | E | 16p12   | 1 | 26875000 | 5610  | fs   | fs rare |
| chr16 | E | 16p12   | 1 | 27125000 | 5494  | fs   | fs rare |
| chr16 | E | 16p12   | 1 | 27375000 | 2242  | fs   | fs rare |
| chr16 | E | 16p12   | 1 | 27625000 | 5566  | fs   | fs rare |
| chr16 | E | 16p11.2 | 2 | 27875000 | 5712  | nofs | nofs    |
| chr16 | E | 16p11.2 | 2 | 28125000 | 5193  | nofs | nofs    |
| chr16 | E | 16p11.2 | 2 | 28375000 | 9934  | nofs | nofs    |
| chr16 | E | 16p11.2 | 2 | 28625000 | 8160  | nofs | nofs    |
| chr16 | E | 16p11.2 | 2 | 28875000 | 7233  | nofs | nofs    |
| chr16 | E | 16p11.2 | 2 | 29125000 | 15367 | nofs | nofs    |
| chr16 | E | 16p11.2 | 2 | 29375000 | 8600  | nofs | nofs    |
| chr16 | E | 16p11.2 | 2 | 29625000 | 7792  | nofs | nofs    |
| chr16 | E | 16p11.2 | 2 | 29875000 | 4139  | nofs | nofs    |
| chr16 | E | 16p11.2 | 2 | 30125000 | 10609 | nofs | nofs    |
| chr16 | E | 16p11.2 | 2 | 30375000 | 6342  | nofs | nofs    |
| chr16 | E | 16p11.2 | 2 | 30625000 | 6245  | nofs | nofs    |
| chr16 | E | 16p11.2 | 2 | 30875000 | 5560  | nofs | nofs    |
| chr16 | E | 16p11.2 | 2 | 31125000 | 9311  | nofs | nofs    |
| chr16 | E | 16p11.2 | 2 | 31375000 | 4570  | nofs | nofs    |
| chr16 | E | 16p11.2 | 2 | 31625000 | 3583  | nofs | nofs    |
| chr16 | E | 16p11.2 | 2 | 31875000 | 6914  | nofs | nofs    |
| chr16 | C | 16p11.2 | 2 | 32125000 | 11798 | nofs | nofs    |
| chr16 | C | 16p11.2 | 2 | 32375000 | 94712 | nofs | nofs    |

|       |   |         |   |          |        |      |      |
|-------|---|---------|---|----------|--------|------|------|
| chr16 | C | 16p11.2 | 2 | 32625000 | 19960  | nofs | nofs |
| chr16 | C | 16p11.2 | 2 | 32875000 | 9670   | nofs | nofs |
| chr16 | C | 16p11.2 | 2 | 33125000 | 18407  | nofs | nofs |
| chr16 | C | 16p11.2 | 2 | 33375000 | 7380   | nofs | nofs |
| chr16 | C | 16p11.2 | 2 | 33625000 | 6377   | nofs | nofs |
| chr16 | C | 16p11.2 | 2 | 33875000 | 101635 | nofs | nofs |
| chr16 | C | 16p11.2 | 2 | 34125000 | 18500  | nofs | nofs |
| chr16 | C | 16p11.2 | 2 | 34375000 | 2472   | nofs | nofs |
| chr16 | C | 16p11.2 | 2 | 34625000 | 10296  | nofs | nofs |
| chr16 | C | 16p11.2 | 2 | 34875000 | 58013  | nofs | nofs |
| chr16 | C | 16p11.2 | 2 | 35125000 | 101204 | nofs | nofs |
| chr16 | C |         | . | 35375000 | 0      | nofs | nofs |
| chr16 | C |         | . | 35625000 | 0      | nofs | nofs |
| chr16 | C |         | . | 35875000 | 0      | nofs | nofs |
| chr16 | C |         | . | 36125000 | 0      | nofs | nofs |
| chr16 | C |         | . | 36375000 | 0      | nofs | nofs |
| chr16 | C |         | . | 36625000 | 0      | nofs | nofs |
| chr16 | C |         | . | 36875000 | 0      | nofs | nofs |
| chr16 | C |         | . | 37125000 | 0      | nofs | nofs |
| chr16 | C |         | . | 37375000 | 0      | nofs | nofs |
| chr16 | C |         | . | 37625000 | 0      | nofs | nofs |
| chr16 | C |         | . | 37875000 | 0      | nofs | nofs |
| chr16 | C |         | . | 38125000 | 0      | nofs | nofs |
| chr16 | C |         | . | 38375000 | 0      | nofs | nofs |
| chr16 | C |         | . | 38625000 | 0      | nofs | nofs |
| chr16 | C |         | . | 38875000 | 0      | nofs | nofs |
| chr16 | C |         | . | 39125000 | 0      | nofs | nofs |
| chr16 | C |         | . | 39375000 | 0      | nofs | nofs |
| chr16 | C |         | . | 39625000 | 0      | nofs | nofs |
| chr16 | C |         | . | 39875000 | 0      | nofs | nofs |
| chr16 | C |         | . | 40125000 | 0      | nofs | nofs |
| chr16 | C |         | . | 40375000 | 0      | nofs | nofs |
| chr16 | C |         | . | 40625000 | 0      | nofs | nofs |
| chr16 | C |         | . | 40875000 | 0      | nofs | nofs |
| chr16 | C |         | . | 41125000 | 0      | nofs | nofs |
| chr16 | C |         | . | 41375000 | 0      | nofs | nofs |

|       |   |   |          |       |      |      |
|-------|---|---|----------|-------|------|------|
| chr16 | C | . | 41625000 | 0     | nofs | nofs |
| chr16 | C | . | 41875000 | 0     | nofs | nofs |
| chr16 | C | . | 42125000 | 0     | nofs | nofs |
| chr16 | C | . | 42375000 | 0     | nofs | nofs |
| chr16 | C | . | 42625000 | 0     | nofs | nofs |
| chr16 | C | . | 42875000 | 0     | nofs | nofs |
| chr16 | C | . | 43125000 | 0     | nofs | nofs |
| chr16 | C | . | 43375000 | 0     | nofs | nofs |
| chr16 | C | . | 43625000 | 0     | nofs | nofs |
| chr16 | C | . | 43875000 | 0     | nofs | nofs |
| chr16 | C | . | 44125000 | 0     | nofs | nofs |
| chr16 | C | . | 44375000 | 0     | nofs | nofs |
| chr16 | C | . | 44625000 | 0     | nofs | nofs |
| chr16 | C | . | 44875000 | 56484 | nofs | nofs |
| chr16 | C | 1 | 45125000 | 20250 | nofs | nofs |
| chr16 | C | 1 | 45375000 | 5047  | nofs | nofs |
| chr16 | C | 1 | 45625000 | 4899  | nofs | nofs |
| chr16 | C | 1 | 45875000 | 2701  | nofs | nofs |
| chr16 | C | 1 | 46125000 | 2834  | nofs | nofs |
| chr16 | C | 1 | 46375000 | 2979  | nofs | nofs |
| chr16 | C | 1 | 46625000 | 3508  | nofs | nofs |
| chr16 | C | 1 | 46875000 | 2233  | nofs | nofs |
| chr16 | C | 1 | 47125000 | 4137  | nofs | nofs |
| chr16 | C | 1 | 47375000 | 2681  | nofs | nofs |
| chr16 | C | 1 | 47625000 | 6349  | nofs | nofs |
| chr16 | C | 1 | 47875000 | 2679  | nofs | nofs |
| chr16 | E | 1 | 48125000 | 5919  | nofs | nofs |
| chr16 | E | 1 | 48375000 | 4766  | nofs | nofs |
| chr16 | E | 1 | 48625000 | 3832  | nofs | nofs |
| chr16 | E | 1 | 48875000 | 1942  | nofs | nofs |
| chr16 | E | 1 | 49125000 | 5258  | nofs | nofs |
| chr16 | E | 1 | 49375000 | 2496  | nofs | nofs |
| chr16 | E | 1 | 49625000 | 4942  | nofs | nofs |
| chr16 | E | 1 | 49875000 | 3782  | nofs | nofs |
| chr16 | E | 1 | 50125000 | 2795  | nofs | nofs |
| chr16 | E | 1 | 50375000 | 2873  | nofs | nofs |



|       |   |         |   |          |      |      |      |
|-------|---|---------|---|----------|------|------|------|
| chr16 | E | 16q12.1 | 1 | 50625000 | 2403 | nofs | nofs |
| chr16 | E | 16q12.1 | 1 | 50875000 | 3872 | nofs | nofs |
| chr16 | E | 16q12.1 | 1 | 51125000 | 2356 | nofs | nofs |
| chr16 | E | 16q12.2 | 1 | 51375000 | 4127 | nofs | nofs |
| chr16 | E | 16q12.2 | 1 | 51625000 | 4182 | nofs | nofs |
| chr16 | E | 16q12.2 | 1 | 51875000 | 1950 | nofs | nofs |
| chr16 | E | 16q12.2 | 1 | 52125000 | 3589 | nofs | nofs |
| chr16 | E | 16q12.2 | 1 | 52375000 | 2817 | nofs | nofs |
| chr16 | E | 16q12.2 | 1 | 52625000 | 2410 | nofs | nofs |
| chr16 | E | 16q12.2 | 1 | 52875000 | 3592 | nofs | nofs |
| chr16 | E | 16q12.2 | 1 | 53125000 | 2649 | nofs | nofs |
| chr16 | E | 16q12.2 | 1 | 53375000 | 3676 | nofs | nofs |
| chr16 | E | 16q12.2 | 1 | 53625000 | 3377 | nofs | nofs |
| chr16 | E | 16q12.2 | 1 | 53875000 | 2631 | nofs | nofs |
| chr16 | E | 16q12.2 | 1 | 54125000 | 3156 | nofs | nofs |
| chr16 | E | 16q12.2 | 1 | 54375000 | 5809 | nofs | nofs |
| chr16 | E | 16q12.2 | 1 | 54625000 | 3452 | nofs | nofs |
| chr16 | E | 16q12.2 | 1 | 54875000 | 2317 | nofs | nofs |
| chr16 | E | 16q12.2 | 1 | 55125000 | 2825 | nofs | nofs |
| chr16 | E | 16q13   | 2 | 55375000 | 4945 | nofs | nofs |
| chr16 | E | 16q13   | 2 | 55625000 | 5117 | nofs | nofs |
| chr16 | E | 16q13   | 2 | 55875000 | 6678 | nofs | nofs |
| chr16 | E | 16q13   | 2 | 56125000 | 5407 | nofs | nofs |
| chr16 | E | 16q13   | 2 | 56375000 | 7535 | nofs | nofs |
| chr16 | E | 16q13   | 2 | 56625000 | 5271 | nofs | nofs |
| chr16 | E | 16q13   | 2 | 56875000 | 4874 | nofs | nofs |
| chr16 | E | 16q21   | 2 | 57125000 | 4189 | nofs | nofs |
| chr16 | E | 16q21   | 2 | 57375000 | 4881 | nofs | nofs |
| chr16 | E | 16q21   | 2 | 57625000 | 4077 | nofs | nofs |
| chr16 | E | 16q21   | 2 | 57875000 | 2953 | nofs | nofs |
| chr16 | E | 16q21   | 2 | 58125000 | 2557 | nofs | nofs |
| chr16 | E | 16q21   | 2 | 58375000 | 2860 | nofs | nofs |
| chr16 | E | 16q21   | 2 | 58625000 | 2379 | nofs | nofs |
| chr16 | E | 16q21   | 2 | 58875000 | 4680 | nofs | nofs |
| chr16 | E | 16q21   | 2 | 59125000 | 2867 | nofs | nofs |
| chr16 | E | 16q21   | 2 | 59375000 | 4599 | nofs | nofs |

|       |   |       |   |          |      |      |                    |
|-------|---|-------|---|----------|------|------|--------------------|
| chr16 | E | 16q21 | 2 | 59625000 | 2756 | nofs | nofs               |
| chr16 | E | 16q21 | 2 | 59875000 | 2054 | nofs | nofs               |
| chr16 | E | 16q21 | 2 | 60125000 | 4364 | nofs | nofs               |
| chr16 | E | 16q21 | 2 | 60375000 | 2625 | nofs | nofs               |
| chr16 | E | 16q21 | 2 | 60625000 | 4430 | nofs | nofs               |
| chr16 | E | 16q21 | 2 | 60875000 | 2899 | nofs | nofs               |
| chr16 | E | 16q21 | 2 | 61125000 | 2282 | nofs | nofs               |
| chr16 | E | 16q21 | 2 | 61375000 | 2423 | nofs | nofs               |
| chr16 | E | 16q21 | 2 | 61625000 | 3453 | nofs | nofs               |
| chr16 | E | 16q21 | 2 | 61875000 | 2815 | nofs | nofs               |
| chr16 | E | 16q21 | 2 | 62125000 | 2870 | nofs | nofs               |
| chr16 | E | 16q21 | 2 | 62375000 | 2057 | nofs | nofs               |
| chr16 | E | 16q21 | 2 | 62625000 | 3077 | nofs | nofs               |
| chr16 | E | 16q21 | 2 | 62875000 | 2912 | nofs | nofs               |
| chr16 | E | 16q21 | 2 | 63125000 | 3323 | nofs | nofs               |
| chr16 | E | 16q21 | 2 | 63375000 | 2752 | nofs | nofs               |
| chr16 | E | 16q21 | 2 | 63625000 | 4298 | nofs | nofs               |
| chr16 | E | 16q21 | 2 | 63875000 | 3477 | nofs | nofs               |
| chr16 | E | 16q22 | 5 | 64125000 | 4081 | fs   | fs common and rare |
| chr16 | E | 16q22 | 5 | 64375000 | 2896 | fs   | fs common and rare |
| chr16 | E | 16q22 | 5 | 64625000 | 3080 | fs   | fs common and rare |
| chr16 | E | 16q22 | 5 | 64875000 | 3639 | fs   | fs common and rare |
| chr16 | E | 16q22 | 5 | 65125000 | 3655 | fs   | fs common and rare |
| chr16 | E | 16q22 | 5 | 65375000 | 7021 | fs   | fs common and rare |
| chr16 | E | 16q22 | 5 | 65625000 | 4314 | fs   | fs common and rare |
| chr16 | E | 16q22 | 5 | 65875000 | 4260 | fs   | fs common and rare |
| chr16 | E | 16q22 | 5 | 66125000 | 4486 | fs   | fs common and rare |
| chr16 | E | 16q22 | 5 | 66375000 | 2809 | fs   | fs common and rare |
| chr16 | E | 16q22 | 5 | 66625000 | 3666 | fs   | fs common and rare |
| chr16 | E | 16q22 | 5 | 66875000 | 2646 | fs   | fs common and rare |
| chr16 | E | 16q22 | 5 | 67125000 | 3920 | fs   | fs common and rare |
| chr16 | E | 16q22 | 5 | 67375000 | 3241 | fs   | fs common and rare |
| chr16 | E | 16q22 | 5 | 67625000 | 3544 | fs   | fs common and rare |
| chr16 | E | 16q22 | 5 | 67875000 | 3300 | fs   | fs common and rare |
| chr16 | E | 16q22 | 5 | 68125000 | 3522 | fs   | fs common and rare |
| chr16 | E | 16q22 | 5 | 68375000 | 2581 | fs   | fs common and rare |

|       |   |       |   |          |       |      |                    |
|-------|---|-------|---|----------|-------|------|--------------------|
| chr16 | E | 16q22 | 5 | 68625000 | 4873  | fs   | fs common and rare |
| chr16 | E | 16q22 | 5 | 68875000 | 7063  | fs   | fs common and rare |
| chr16 | E | 16q22 | 5 | 69125000 | 4508  | fs   | fs common and rare |
| chr16 | E | 16q22 | 5 | 69375000 | 2737  | fs   | fs common and rare |
| chr16 | E | 16q22 | 5 | 69625000 | 2106  | nofs | nofs               |
| chr16 | E | 16q22 | 5 | 69875000 | 3244  | nofs | nofs               |
| chr16 | E | 16q22 | 5 | 70125000 | 4404  | nofs | nofs               |
| chr16 | E | 16q22 | 5 | 70375000 | 3148  | nofs | nofs               |
| chr16 | E | 16q22 | 5 | 70625000 | 2286  | nofs | nofs               |
| chr16 | E | 16q22 | 5 | 70875000 | 3200  | nofs | nofs               |
| chr16 | E | 16q22 | 5 | 71125000 | 2575  | nofs | nofs               |
| chr16 | E | 16q22 | 5 | 71375000 | 2346  | nofs | nofs               |
| chr16 | E | 16q22 | 5 | 71625000 | 2957  | nofs | nofs               |
| chr16 | E | 16q22 | 5 | 71875000 | 5157  | nofs | nofs               |
| chr16 | E | 16q22 | 5 | 72125000 | 3033  | nofs | nofs               |
| chr16 | E | 16q22 | 5 | 72375000 | 2640  | nofs | nofs               |
| chr16 | E | 16q22 | 5 | 72625000 | 4576  | nofs | nofs               |
| chr16 | E | 16q22 | 5 | 72875000 | 3838  | nofs | nofs               |
| chr16 | E | 16q22 | 5 | 73125000 | 4234  | nofs | nofs               |
| chr16 | E | 16q23 | 4 | 73375000 | 2947  | nofs | nofs               |
| chr16 | E | 16q23 | 4 | 73625000 | 2298  | nofs | nofs               |
| chr16 | E | 16q23 | 4 | 73875000 | 2805  | nofs | nofs               |
| chr16 | E | 16q23 | 4 | 74125000 | 3135  | nofs | nofs               |
| chr16 | E | 16q23 | 4 | 74375000 | 3472  | nofs | nofs               |
| chr16 | E | 16q23 | 4 | 74625000 | 2571  | nofs | nofs               |
| chr16 | E | 16q23 | 4 | 74875000 | 2691  | nofs | nofs               |
| chr16 | E | 16q23 | 4 | 75125000 | 2939  | nofs | nofs               |
| chr16 | E | 16q23 | 4 | 75375000 | 1515  | nofs | nofs               |
| chr16 | E | 16q23 | 4 | 75625000 | 2469  | nofs | nofs               |
| chr16 | E | 16q23 | 4 | 75875000 | 3051  | nofs | nofs               |
| chr16 | E | 16q23 | 4 | 76125000 | 1586  | nofs | nofs               |
| chr16 | E | 16q23 | 4 | 76375000 | 10757 | nofs | nofs               |
| chr16 | E | 16q23 | 4 | 76625000 | 2692  | nofs | nofs               |
| chr16 | E | 16q23 | 4 | 76875000 | 3638  | nofs | nofs               |
| chr16 | E | 16q23 | 4 | 77125000 | 2611  | nofs | nofs               |
| chr16 | E | 16q23 | 4 | 77375000 | 3311  | nofs | nofs               |

|       |   |       |   |          |       |      |           |
|-------|---|-------|---|----------|-------|------|-----------|
| chr16 | E | 16q23 | 4 | 77625000 | 3479  | nofs | nofs      |
| chr16 | E | 16q23 | 4 | 77875000 | 4347  | nofs | nofs      |
| chr16 | E | 16q23 | 4 | 78125000 | 3671  | nofs | nofs      |
| chr16 | E | 16q23 | 4 | 78375000 | 4095  | nofs | nofs      |
| chr16 | E | 16q23 | 4 | 78625000 | 2534  | fs   | fs common |
| chr16 | E | 16q23 | 4 | 78875000 | 4662  | fs   | fs common |
| chr16 | E | 16q23 | 4 | 79125000 | 4204  | fs   | fs common |
| chr16 | E | 16q23 | 4 | 79375000 | 3743  | fs   | fs common |
| chr16 | E | 16q23 | 4 | 79625000 | 2359  | fs   | fs common |
| chr16 | E | 16q23 | 4 | 79875000 | 4338  | fs   | fs common |
| chr16 | E | 16q23 | 4 | 80125000 | 7014  | fs   | fs common |
| chr16 | E | 16q23 | 4 | 80375000 | 6783  | fs   | fs common |
| chr16 | E | 16q23 | 4 | 80625000 | 3500  | fs   | fs common |
| chr16 | E | 16q23 | 4 | 80875000 | 4957  | nofs | fs common |
| chr16 | E | 16q23 | 4 | 81125000 | 2075  | nofs | nofs      |
| chr16 | E | 16q23 | 4 | 81375000 | 2660  | nofs | nofs      |
| chr16 | E | 16q23 | 4 | 81625000 | 2760  | nofs | nofs      |
| chr16 | E | 16q23 | 4 | 81875000 | 2263  | nofs | nofs      |
| chr16 | E | 16q23 | 4 | 82125000 | 4783  | nofs | nofs      |
| chr16 | E | 16q23 | 4 | 82375000 | 3644  | nofs | nofs      |
| chr16 | E | 16q23 | 4 | 82625000 | 10877 | nofs | nofs      |
| chr16 | B | 16q24 | . | 82875000 | 4005  | nofs | nofs      |
| chr16 | B | 16q24 | . | 83125000 | 4198  | nofs | nofs      |
| chr16 | B | 16q24 | . | 83375000 | 3944  | nofs | nofs      |
| chr16 | B | 16q24 | . | 83625000 | 5874  | nofs | nofs      |
| chr16 | B | 16q24 | . | 83875000 | 12829 | nofs | nofs      |
| chr16 | B | 16q24 | . | 84125000 | 10709 | nofs | nofs      |
| chr16 | B | 16q24 | . | 84375000 | 8772  | nofs | nofs      |
| chr16 | B | 16q24 | . | 84625000 | 10178 | nofs | nofs      |
| chr16 | B | 16q24 | . | 84875000 | 8495  | nofs | nofs      |
| chr16 | B | 16q24 | . | 85125000 | 6494  | nofs | nofs      |
| chr16 | B | 16q24 | . | 85375000 | 11882 | nofs | nofs      |
| chr16 | T | 16q24 | . | 85625000 | 10026 | nofs | nofs      |
| chr16 | T | 16q24 | . | 85875000 | 9034  | nofs | nofs      |
| chr16 | T | 16q24 | . | 86125000 | 10161 | nofs | nofs      |
| chr16 | T | 16q24 | . | 86375000 | 13907 | nofs | nofs      |

|       |   |       |   |          |       |      |      |
|-------|---|-------|---|----------|-------|------|------|
| chr16 | T | 16q24 | . | 86625000 | 17174 | nofs | nofs |
| chr16 | T | 16q24 | . | 86875000 | 28651 | nofs | nofs |
| chr16 | T | 16q24 | . | 87125000 | 16926 | nofs | nofs |
| chr16 | T | 16q24 | . | 87375000 | 14038 | nofs | nofs |
| chr16 | T | 16q24 | . | 87625000 | 34844 | nofs | nofs |
| chr16 | T | 16q24 | . | 87875000 | 20925 | nofs | nofs |
| chr16 | T | 16q24 | . | 88125000 | 23746 | nofs | nofs |
| chr16 | T | 16q24 | . | 88375000 | 18823 | nofs | nofs |
| chr16 | T | 16q24 | . | 88625000 | 16251 | nofs | nofs |
| chr17 | T | 17p13 | 4 | 125000   | 45186 | nofs | nofs |
| chr17 | T | 17p13 | 4 | 375000   | 35790 | nofs | nofs |
| chr17 | T | 17p13 | 4 | 625000   | 23393 | nofs | nofs |
| chr17 | T | 17p13 | 4 | 875000   | 27540 | nofs | nofs |
| chr17 | T | 17p13 | 4 | 1125000  | 20324 | nofs | nofs |
| chr17 | T | 17p13 | 4 | 1375000  | 7217  | nofs | nofs |
| chr17 | T | 17p13 | 4 | 1625000  | 8970  | nofs | nofs |
| chr17 | T | 17p13 | 4 | 1875000  | 6793  | nofs | nofs |
| chr17 | T | 17p13 | 4 | 2125000  | 7415  | nofs | nofs |
| chr17 | T | 17p13 | 4 | 2375000  | 7025  | nofs | nofs |
| chr17 | T | 17p13 | 4 | 2625000  | 5499  | nofs | nofs |
| chr17 | T | 17p13 | 4 | 2875000  | 6721  | nofs | nofs |
| chr17 | T | 17p13 | 4 | 3125000  | 4108  | nofs | nofs |
| chr17 | E | 17p13 | 4 | 3375000  | 6325  | nofs | nofs |
| chr17 | E | 17p13 | 4 | 3625000  | 10679 | nofs | nofs |
| chr17 | E | 17p13 | 4 | 3875000  | 6981  | nofs | nofs |
| chr17 | E | 17p13 | 4 | 4125000  | 6516  | nofs | nofs |
| chr17 | E | 17p13 | 4 | 4375000  | 6604  | nofs | nofs |
| chr17 | E | 17p13 | 4 | 4625000  | 7140  | nofs | nofs |
| chr17 | E | 17p13 | 4 | 4875000  | 8503  | nofs | nofs |
| chr17 | E | 17p13 | 4 | 5125000  | 6204  | nofs | nofs |
| chr17 | E | 17p13 | 4 | 5375000  | 3319  | nofs | nofs |
| chr17 | E | 17p13 | 4 | 5625000  | 5445  | nofs | nofs |
| chr17 | E | 17p13 | 4 | 5875000  | 3561  | nofs | nofs |
| chr17 | E | 17p13 | 4 | 6125000  | 5775  | nofs | nofs |
| chr17 | E | 17p13 | 4 | 6375000  | 6587  | nofs | nofs |
| chr17 | E | 17p13 | 4 | 6625000  | 4537  | nofs | nofs |

|       |   |       |   |          |      |      |         |
|-------|---|-------|---|----------|------|------|---------|
| chr17 | E | 17p13 | 4 | 6875000  | 4817 | nofs | nofs    |
| chr17 | E | 17p13 | 4 | 7125000  | 5165 | nofs | nofs    |
| chr17 | E | 17p13 | 4 | 7375000  | 5118 | nofs | nofs    |
| chr17 | E | 17p13 | 4 | 7625000  | 3982 | nofs | nofs    |
| chr17 | E | 17p13 | 4 | 7875000  | 3287 | nofs | nofs    |
| chr17 | E | 17p13 | 4 | 8125000  | 5559 | nofs | nofs    |
| chr17 | E | 17p13 | 4 | 8375000  | 2895 | nofs | nofs    |
| chr17 | E | 17p13 | 4 | 8625000  | 7158 | nofs | nofs    |
| chr17 | E | 17p13 | 4 | 8875000  | 4133 | nofs | nofs    |
| chr17 | E | 17p13 | 4 | 9125000  | 4773 | nofs | nofs    |
| chr17 | E | 17p13 | 4 | 9375000  | 4552 | nofs | nofs    |
| chr17 | E | 17p13 | 4 | 9625000  | 5076 | nofs | nofs    |
| chr17 | E | 17p13 | 4 | 9875000  | 4721 | nofs | nofs    |
| chr17 | E | 17p13 | 4 | 10125000 | 3658 | nofs | nofs    |
| chr17 | E | 17p13 | 4 | 10375000 | 3204 | nofs | nofs    |
| chr17 | E | 17p13 | 4 | 10625000 | 3695 | nofs | nofs    |
| chr17 | E | 17p12 | 1 | 10875000 | 2695 | fs   | fs rare |
| chr17 | E | 17p12 | 1 | 11125000 | 3408 | fs   | fs rare |
| chr17 | E | 17p12 | 1 | 11375000 | 3360 | fs   | fs rare |
| chr17 | E | 17p12 | 1 | 11625000 | 3451 | fs   | fs rare |
| chr17 | E | 17p12 | 1 | 11875000 | 3579 | fs   | fs rare |
| chr17 | E | 17p12 | 1 | 12125000 | 5818 | fs   | fs rare |
| chr17 | E | 17p12 | 1 | 12375000 | 5037 | fs   | fs rare |
| chr17 | E | 17p12 | 1 | 12625000 | 3686 | fs   | fs rare |
| chr17 | E | 17p12 | 1 | 12875000 | 3355 | fs   | fs rare |
| chr17 | E | 17p12 | 1 | 13125000 | 3903 | fs   | fs rare |
| chr17 | E | 17p12 | 1 | 13375000 | 5264 | fs   | fs rare |
| chr17 | E | 17p12 | 1 | 13625000 | 5692 | fs   | fs rare |
| chr17 | E | 17p12 | 1 | 13875000 | 2212 | fs   | fs rare |
| chr17 | E | 17p12 | 1 | 14125000 | 2069 | fs   | fs rare |
| chr17 | E | 17p12 | 1 | 14375000 | 3887 | fs   | fs rare |
| chr17 | E | 17p12 | 1 | 14625000 | 1805 | fs   | fs rare |
| chr17 | E | 17p12 | 1 | 14875000 | 1877 | fs   | fs rare |
| chr17 | E | 17p12 | 1 | 15125000 | 2506 | fs   | fs rare |
| chr17 | E | 17p12 | 1 | 15375000 | 4472 | fs   | fs rare |
| chr17 | E | 17p12 | 1 | 15625000 | 4157 | fs   | fs rare |

| chr17 | E | 17p12   | 1 | 15875000 | 5086  | fs   | fs rate |
|-------|---|---------|---|----------|-------|------|---------|
| chr17 | E | 17p11.2 | 4 | 16125000 | 5977  | nofs | nofs    |
| chr17 | E | 17p11.2 | 4 | 16375000 | 4233  | nofs | nofs    |
| chr17 | E | 17p11.2 | 4 | 16625000 | 2611  | nofs | nofs    |
| chr17 | E | 17p11.2 | 4 | 16875000 | 3046  | nofs | nofs    |
| chr17 | E | 17p11.2 | 4 | 17125000 | 5289  | nofs | nofs    |
| chr17 | E | 17p11.2 | 4 | 17375000 | 6010  | nofs | nofs    |
| chr17 | E | 17p11.2 | 4 | 17625000 | 2528  | nofs | nofs    |
| chr17 | E | 17p11.2 | 4 | 17875000 | 5349  | nofs | nofs    |
| chr17 | E | 17p11.2 | 4 | 18125000 | 4169  | nofs | nofs    |
| chr17 | E | 17p11.2 | 4 | 18375000 | 2688  | nofs | nofs    |
| chr17 | E | 17p11.2 | 4 | 18625000 | 3877  | nofs | nofs    |
| chr17 | C | 17p11.2 | 4 | 18875000 | 4739  | nofs | nofs    |
| chr17 | C | 17p11.2 | 4 | 19125000 | 5641  | nofs | nofs    |
| chr17 | C | 17p11.2 | 4 | 19375000 | 5246  | nofs | nofs    |
| chr17 | C | 17p11.2 | 4 | 19625000 | 5056  | nofs | nofs    |
| chr17 | C | 17p11.2 | 4 | 19875000 | 3641  | nofs | nofs    |
| chr17 | C | 17p11.2 | 4 | 20125000 | 1892  | nofs | nofs    |
| chr17 | C | 17p11.2 | 4 | 20375000 | 4257  | nofs | nofs    |
| chr17 | C | 17p11.2 | 4 | 20625000 | 4671  | nofs | nofs    |
| chr17 | C | 17p11.2 | 4 | 20875000 | 5825  | nofs | nofs    |
| chr17 | C | 17p11.2 | 4 | 21125000 | 4016  | nofs | nofs    |
| chr17 | C | 17p11.2 | 4 | 21375000 | 3852  | nofs | nofs    |
| chr17 | C | 17p11.1 | . | 21375000 | 3852  | nofs | nofs    |
| chr17 | C | 17p11.1 | . | 21625000 | 31117 | nofs | nofs    |
| chr17 | C |         | . | 21875000 | 3709  | nofs | nofs    |
| chr17 | C |         | . | 22125000 | 54097 | nofs | nofs    |
| chr17 | C |         | . | 22375000 | 8711  | nofs | nofs    |
| chr17 | C | 17q11.1 | . | 22625000 | 26410 | nofs | nofs    |
| chr17 | C | 17q11.1 | . | 22875000 | 2578  | nofs | nofs    |
| chr17 | C | 17q11.1 | . | 23125000 | 2027  | nofs | nofs    |
| chr17 | C | 17q11.2 | 5 | 23375000 | 2729  | nofs | nofs    |
| chr17 | C | 17q11.2 | 5 | 23625000 | 5549  | nofs | nofs    |
| chr17 | C | 17q11.2 | 5 | 23875000 | 8689  | nofs | nofs    |
| chr17 | C | 17q11.2 | 5 | 24125000 | 5199  | nofs | nofs    |
| chr17 | C | 17q11.2 | 5 | 24375000 | 2346  | nofs | nofs    |

|       |   |         |   |          |      |      |      |
|-------|---|---------|---|----------|------|------|------|
| chr17 | C | 17q11.2 | 5 | 24625000 | 4666 | nofs | nofs |
| chr17 | C | 17q11.2 | 5 | 24875000 | 3228 | nofs | nofs |
| chr17 | C | 17q11.2 | 5 | 25125000 | 5068 | nofs | nofs |
| chr17 | C | 17q11.2 | 5 | 25375000 | 3087 | nofs | nofs |
| chr17 | C | 17q11.2 | 5 | 25625000 | 4125 | nofs | nofs |
| chr17 | E | 17q11.2 | 5 | 25875000 | 3253 | nofs | nofs |
| chr17 | E | 17q11.2 | 5 | 26125000 | 6641 | nofs | nofs |
| chr17 | E | 17q11.2 | 5 | 26375000 | 6084 | nofs | nofs |
| chr17 | E | 17q11.2 | 5 | 26625000 | 1769 | nofs | nofs |
| chr17 | E | 17q11.2 | 5 | 26875000 | 3983 | nofs | nofs |
| chr17 | E | 17q11.2 | 5 | 27125000 | 4955 | nofs | nofs |
| chr17 | E | 17q11.2 | 5 | 27375000 | 7171 | nofs | nofs |
| chr17 | E | 17q11.2 | 5 | 27625000 | 5813 | nofs | nofs |
| chr17 | E | 17q11.2 | 5 | 27875000 | 3228 | nofs | nofs |
| chr17 | E | 17q11.2 | 5 | 28125000 | 1912 | nofs | nofs |
| chr17 | E | 17q11.2 | 5 | 28375000 | 4831 | nofs | nofs |
| chr17 | E | 17q11.2 | 5 | 28625000 | 3566 | nofs | nofs |
| chr17 | E | 17q11.2 | 5 | 28875000 | 2366 | nofs | nofs |
| chr17 | E | 17q12   | 3 | 29125000 | 2572 | nofs | nofs |
| chr17 | E | 17q12   | 3 | 29375000 | 2684 | nofs | nofs |
| chr17 | E | 17q12   | 3 | 29625000 | 2509 | nofs | nofs |
| chr17 | E | 17q12   | 3 | 29875000 | 2255 | nofs | nofs |
| chr17 | E | 17q12   | 3 | 30125000 | 3432 | nofs | nofs |
| chr17 | E | 17q12   | 3 | 30375000 | 1876 | nofs | nofs |
| chr17 | E | 17q12   | 3 | 30625000 | 3319 | nofs | nofs |
| chr17 | E | 17q12   | 3 | 30875000 | 4047 | nofs | nofs |
| chr17 | E | 17q12   | 3 | 31125000 | 2240 | nofs | nofs |
| chr17 | E | 17q12   | 3 | 31375000 | 3868 | nofs | nofs |
| chr17 | E | 17q12   | 3 | 31625000 | 2187 | nofs | nofs |
| chr17 | E | 17q12   | 3 | 31875000 | 1604 | nofs | nofs |
| chr17 | E | 17q12   | 3 | 32125000 | 4919 | nofs | nofs |
| chr17 | E | 17q12   | 3 | 32375000 | 4142 | nofs | nofs |
| chr17 | E | 17q12   | 3 | 32625000 | 1971 | nofs | nofs |
| chr17 | E | 17q12   | 3 | 32875000 | 3275 | nofs | nofs |
| chr17 | E | 17q12   | 3 | 33125000 | 2376 | nofs | nofs |
| chr17 | E | 17q12   | 3 | 33375000 | 2874 | nofs | nofs |



|       |   |         |   |          |      |      |      |
|-------|---|---------|---|----------|------|------|------|
| chr17 | E | 17q12   | 3 | 33625000 | 4870 | nofs | nofs |
| chr17 | E | 17q12   | 3 | 33875000 | 3860 | nofs | nofs |
| chr17 | E | 17q12   | 3 | 34125000 | 5823 | nofs | nofs |
| chr17 | E | 17q12   | 3 | 34375000 | 5633 | nofs | nofs |
| chr17 | E | 17q12   | 3 | 34625000 | 6433 | nofs | nofs |
| chr17 | E | 17q12   | 3 | 34875000 | 5536 | nofs | nofs |
| chr17 | E | 17q12   | 3 | 35125000 | 3364 | nofs | nofs |
| chr17 | E | 17q12   | 3 | 35375000 | 6649 | nofs | nofs |
| chr17 | E | 17q21.1 | 1 | 35625000 | 7172 | nofs | nofs |
| chr17 | E | 17q21.1 | 1 | 35875000 | 2369 | nofs | nofs |
| chr17 | E | 17q21.2 | 3 | 36125000 | 2291 | nofs | nofs |
| chr17 | E | 17q21.2 | 3 | 36375000 | 6509 | nofs | nofs |
| chr17 | E | 17q21.2 | 3 | 36625000 | 9276 | nofs | nofs |
| chr17 | E | 17q21.2 | 3 | 36875000 | 2926 | nofs | nofs |
| chr17 | E | 17q21.2 | 3 | 37125000 | 7801 | nofs | nofs |
| chr17 | E | 17q21.2 | 3 | 37375000 | 6817 | nofs | nofs |
| chr17 | E | 17q21.2 | 3 | 37625000 | 5489 | nofs | nofs |
| chr17 | E | 17q21.2 | 3 | 37875000 | 6145 | nofs | nofs |
| chr17 | E | 17q21.2 | 3 | 38125000 | 5559 | nofs | nofs |
| chr17 | E | 17q21.2 | 3 | 38375000 | 6675 | nofs | nofs |
| chr17 | E | 17q21.3 | 6 | 38625000 | 4018 | nofs | nofs |
| chr17 | E | 17q21.3 | 6 | 38875000 | 6026 | nofs | nofs |
| chr17 | E | 17q21.3 | 6 | 39125000 | 3812 | nofs | nofs |
| chr17 | E | 17q21.3 | 6 | 39375000 | 5484 | nofs | nofs |
| chr17 | E | 17q21.3 | 6 | 39625000 | 6682 | nofs | nofs |
| chr17 | E | 17q21.3 | 6 | 39875000 | 5132 | nofs | nofs |
| chr17 | E | 17q21.3 | 6 | 40125000 | 5074 | nofs | nofs |
| chr17 | E | 17q21.3 | 6 | 40375000 | 8049 | nofs | nofs |
| chr17 | E | 17q21.3 | 6 | 40625000 | 5162 | nofs | nofs |
| chr17 | E | 17q21.3 | 6 | 40875000 | 4282 | nofs | nofs |
| chr17 | E | 17q21.3 | 6 | 41125000 | 3935 | nofs | nofs |
| chr17 | E | 17q21.3 | 6 | 41375000 | 4304 | nofs | nofs |
| chr17 | E | 17q21.3 | 6 | 41625000 | 4471 | nofs | nofs |
| chr17 | E | 17q21.3 | 6 | 41875000 | 2382 | nofs | nofs |
| chr17 | E | 17q21.3 | 6 | 42125000 | 2701 | nofs | nofs |
| chr17 | E | 17q21.3 | 6 | 42375000 | 2841 | nofs | nofs |

|       |   |         |   |          |      |      |           |
|-------|---|---------|---|----------|------|------|-----------|
| chr17 | E | 17q21.3 | 6 | 42625000 | 3011 | nofs | nofs      |
| chr17 | E | 17q21.3 | 6 | 42875000 | 5914 | nofs | nofs      |
| chr17 | E | 17q21.3 | 6 | 43125000 | 2683 | nofs | nofs      |
| chr17 | E | 17q21.3 | 6 | 43375000 | 2722 | nofs | nofs      |
| chr17 | E | 17q21.3 | 6 | 43625000 | 3935 | nofs | nofs      |
| chr17 | E | 17q21.3 | 6 | 43875000 | 3048 | nofs | nofs      |
| chr17 | E | 17q21.3 | 6 | 44125000 | 5486 | nofs | nofs      |
| chr17 | E | 17q21.3 | 6 | 44375000 | 7075 | nofs | nofs      |
| chr17 | E | 17q21.3 | 6 | 44625000 | 5116 | nofs | nofs      |
| chr17 | E | 17q21.3 | 6 | 44875000 | 3559 | nofs | nofs      |
| chr17 | E | 17q21.3 | 6 | 45125000 | 2743 | nofs | nofs      |
| chr17 | E | 17q21.3 | 6 | 45375000 | 3475 | nofs | nofs      |
| chr17 | E | 17q21.3 | 6 | 45625000 | 3674 | nofs | nofs      |
| chr17 | E | 17q21.3 | 6 | 45875000 | 2173 | nofs | nofs      |
| chr17 | E | 17q21.3 | 6 | 46125000 | 2945 | nofs | nofs      |
| chr17 | E | 17q21.3 | 6 | 46375000 | 4299 | nofs | nofs      |
| chr17 | E | 17q21.3 | 6 | 46625000 | 4940 | nofs | nofs      |
| chr17 | E | 17q21.3 | 6 | 46875000 | 1798 | nofs | nofs      |
| chr17 | E | 17q21.3 | 6 | 47125000 | 2516 | nofs | nofs      |
| chr17 | E | 17q21.3 | 6 | 47375000 | 1852 | nofs | nofs      |
| chr17 | E | 17q21.3 | 6 | 47625000 | 2268 | nofs | nofs      |
| chr17 | B | 17q22   | . | 47875000 | 2123 | nofs | nofs      |
| chr17 | B | 17q22   | . | 48125000 | 2579 | nofs | nofs      |
| chr17 | B | 17q22   | . | 48375000 | 2188 | nofs | nofs      |
| chr17 | B | 17q22   | . | 48625000 | 2132 | nofs | nofs      |
| chr17 | B | 17q22   | . | 48875000 | 3234 | nofs | nofs      |
| chr17 | B | 17q22   | . | 49125000 | 2094 | nofs | nofs      |
| chr17 | B | 17q22   | . | 49375000 | 2136 | nofs | nofs      |
| chr17 | B | 17q22   | . | 49625000 | 3032 | nofs | nofs      |
| chr17 | B | 17q22   | . | 49875000 | 2038 | nofs | nofs      |
| chr17 | B | 17q22   | . | 50125000 | 1599 | nofs | nofs      |
| chr17 | B | 17q22   | . | 50375000 | 1990 | nofs | nofs      |
| chr17 | B | 17q22   | . | 50625000 | 1619 | nofs | nofs      |
| chr17 | B | 17q22   | . | 50875000 | 2868 | nofs | nofs      |
| chr17 | E | 17q23   | 5 | 51125000 | 2810 | fs   | fs common |
| chr17 | E | 17q23   | 5 | 51375000 | 2160 | fs   | fs common |

|       |   |       |   |          |      |      |           |
|-------|---|-------|---|----------|------|------|-----------|
| chr17 | E | 17q23 | 5 | 51625000 | 2821 | fs   | fs common |
| chr17 | E | 17q23 | 5 | 51875000 | 1808 | nofs | nofs      |
| chr17 | E | 17q23 | 5 | 52125000 | 7193 | nofs | nofs      |
| chr17 | E | 17q23 | 5 | 52375000 | 4348 | nofs | nofs      |
| chr17 | E | 17q23 | 5 | 52625000 | 2866 | nofs | nofs      |
| chr17 | E | 17q23 | 5 | 52875000 | 2309 | nofs | nofs      |
| chr17 | E | 17q23 | 5 | 53125000 | 2688 | nofs | nofs      |
| chr17 | E | 17q23 | 5 | 53375000 | 2968 | nofs | nofs      |
| chr17 | E | 17q23 | 5 | 53625000 | 4494 | nofs | nofs      |
| chr17 | E | 17q23 | 5 | 53875000 | 2328 | nofs | nofs      |
| chr17 | E | 17q23 | 5 | 54125000 | 4752 | nofs | nofs      |
| chr17 | E | 17q23 | 5 | 54375000 | 3696 | nofs | nofs      |
| chr17 | E | 17q23 | 5 | 54625000 | 3984 | nofs | nofs      |
| chr17 | E | 17q23 | 5 | 54875000 | 4667 | nofs | nofs      |
| chr17 | E | 17q23 | 5 | 55125000 | 2584 | nofs | nofs      |
| chr17 | E | 17q23 | 5 | 55375000 | 6556 | nofs | nofs      |
| chr17 | E | 17q23 | 5 | 55625000 | 3274 | nofs | nofs      |
| chr17 | E | 17q23 | 5 | 55875000 | 5632 | nofs | nofs      |
| chr17 | E | 17q23 | 5 | 56125000 | 4767 | nofs | nofs      |
| chr17 | E | 17q23 | 5 | 56375000 | 1708 | nofs | nofs      |
| chr17 | E | 17q23 | 5 | 56625000 | 1859 | nofs | nofs      |
| chr17 | E | 17q23 | 5 | 56875000 | 3168 | nofs | nofs      |
| chr17 | E | 17q23 | 5 | 57125000 | 2556 | nofs | nofs      |
| chr17 | E | 17q23 | 5 | 57375000 | 2132 | nofs | nofs      |
| chr17 | E | 17q23 | 5 | 57625000 | 3849 | nofs | nofs      |
| chr17 | E | 17q23 | 5 | 57875000 | 2934 | nofs | nofs      |
| chr17 | E | 17q23 | 5 | 58125000 | 4941 | nofs | nofs      |
| chr17 | E | 17q23 | 5 | 58375000 | 2810 | nofs | nofs      |
| chr17 | E | 17q23 | 5 | 58625000 | 2056 | nofs | nofs      |
| chr17 | E | 17q23 | 5 | 58875000 | 4370 | nofs | nofs      |
| chr17 | E | 17q23 | 5 | 59125000 | 1673 | nofs | nofs      |
| chr17 | E | 17q23 | 5 | 59375000 | 4244 | nofs | nofs      |
| chr17 | E | 17q23 | 5 | 59625000 | 2709 | nofs | nofs      |
| chr17 | E | 17q23 | 5 | 59875000 | 3217 | nofs | nofs      |
| chr17 | E | 17q24 | 7 | 60125000 | 5545 | nofs | nofs      |
| chr17 | E | 17q24 | 7 | 60375000 | 3324 | nofs | nofs      |

|       |   |       |   |          |      |      |      |
|-------|---|-------|---|----------|------|------|------|
| chr17 | E | 17q24 | 7 | 60625000 | 4750 | nofs | nofs |
| chr17 | E | 17q24 | 7 | 60875000 | 6379 | nofs | nofs |
| chr17 | E | 17q24 | 7 | 61125000 | 3256 | nofs | nofs |
| chr17 | E | 17q24 | 7 | 61375000 | 4029 | nofs | nofs |
| chr17 | E | 17q24 | 7 | 61625000 | 3430 | nofs | nofs |
| chr17 | E | 17q24 | 7 | 61875000 | 2545 | nofs | nofs |
| chr17 | E | 17q24 | 7 | 62125000 | 3674 | nofs | nofs |
| chr17 | E | 17q24 | 7 | 62375000 | 4001 | nofs | nofs |
| chr17 | E | 17q24 | 7 | 62625000 | 5864 | nofs | nofs |
| chr17 | E | 17q24 | 7 | 62875000 | 4368 | nofs | nofs |
| chr17 | E | 17q24 | 7 | 63125000 | 4159 | nofs | nofs |
| chr17 | E | 17q24 | 7 | 63375000 | 4728 | nofs | nofs |
| chr17 | E | 17q24 | 7 | 63625000 | 4115 | nofs | nofs |
| chr17 | E | 17q24 | 7 | 63875000 | 3462 | nofs | nofs |
| chr17 | E | 17q24 | 7 | 64125000 | 3982 | nofs | nofs |
| chr17 | E | 17q24 | 7 | 64375000 | 3705 | nofs | nofs |
| chr17 | E | 17q24 | 7 | 64625000 | 2976 | nofs | nofs |
| chr17 | E | 17q24 | 7 | 64875000 | 3409 | nofs | nofs |
| chr17 | E | 17q24 | 7 | 65125000 | 3327 | nofs | nofs |
| chr17 | E | 17q24 | 7 | 65375000 | 3174 | nofs | nofs |
| chr17 | E | 17q24 | 7 | 65625000 | 3784 | nofs | nofs |
| chr17 | E | 17q24 | 7 | 65875000 | 2531 | nofs | nofs |
| chr17 | E | 17q24 | 7 | 66125000 | 1942 | nofs | nofs |
| chr17 | E | 17q24 | 7 | 66375000 | 5042 | nofs | nofs |
| chr17 | E | 17q24 | 7 | 66625000 | 3932 | nofs | nofs |
| chr17 | E | 17q24 | 7 | 66875000 | 4069 | nofs | nofs |
| chr17 | E | 17q24 | 7 | 67125000 | 6075 | nofs | nofs |
| chr17 | E | 17q24 | 7 | 67375000 | 3946 | nofs | nofs |
| chr17 | E | 17q24 | 7 | 67625000 | 4740 | nofs | nofs |
| chr17 | E | 17q24 | 7 | 67875000 | 3163 | nofs | nofs |
| chr17 | E | 17q24 | 7 | 68125000 | 3718 | nofs | nofs |
| chr17 | E | 17q24 | 7 | 68375000 | 3448 | nofs | nofs |
| chr17 | E | 17q25 | 1 | 68625000 | 4743 | nofs | nofs |
| chr17 | E | 17q25 | 1 | 68875000 | 4397 | nofs | nofs |
| chr17 | E | 17q25 | 1 | 69125000 | 7285 | nofs | nofs |
| chr17 | E | 17q25 | 1 | 69375000 | 3368 | nofs | nofs |

|       |   |       |   |          |       |      |      |
|-------|---|-------|---|----------|-------|------|------|
| chr17 | E | 17q25 | 1 | 69625000 | 3797  | nofs | nofs |
| chr17 | E | 17q25 | 1 | 69875000 | 4608  | nofs | nofs |
| chr17 | E | 17q25 | 1 | 70125000 | 8546  | nofs | nofs |
| chr17 | E | 17q25 | 1 | 70375000 | 5079  | nofs | nofs |
| chr17 | E | 17q25 | 1 | 70625000 | 5230  | nofs | nofs |
| chr17 | E | 17q25 | 1 | 70875000 | 7916  | nofs | nofs |
| chr17 | E | 17q25 | 1 | 71125000 | 5673  | nofs | nofs |
| chr17 | E | 17q25 | 1 | 71375000 | 5868  | nofs | nofs |
| chr17 | E | 17q25 | 1 | 71625000 | 4369  | nofs | nofs |
| chr17 | E | 17q25 | 1 | 71875000 | 5543  | nofs | nofs |
| chr17 | E | 17q25 | 1 | 72125000 | 6749  | nofs | nofs |
| chr17 | E | 17q25 | 1 | 72375000 | 4533  | nofs | nofs |
| chr17 | E | 17q25 | 1 | 72625000 | 3991  | nofs | nofs |
| chr17 | E | 17q25 | 1 | 72875000 | 8590  | nofs | nofs |
| chr17 | E | 17q25 | 1 | 73125000 | 8285  | nofs | nofs |
| chr17 | E | 17q25 | 1 | 73375000 | 9739  | nofs | nofs |
| chr17 | E | 17q25 | 1 | 73625000 | 6585  | nofs | nofs |
| chr17 | E | 17q25 | 1 | 73875000 | 6783  | nofs | nofs |
| chr17 | E | 17q25 | 1 | 74125000 | 4716  | nofs | nofs |
| chr17 | E | 17q25 | 1 | 74375000 | 4394  | nofs | nofs |
| chr17 | E | 17q25 | 1 | 74625000 | 6929  | nofs | nofs |
| chr17 | E | 17q25 | 1 | 74875000 | 9186  | nofs | nofs |
| chr17 | E | 17q25 | 1 | 75125000 | 7588  | nofs | nofs |
| chr17 | T | 17q25 | 1 | 75375000 | 6983  | nofs | nofs |
| chr17 | T | 17q25 | 1 | 75625000 | 5766  | nofs | nofs |
| chr17 | T | 17q25 | 1 | 75875000 | 11521 | nofs | nofs |
| chr17 | T | 17q25 | 1 | 76125000 | 12712 | nofs | nofs |
| chr17 | T | 17q25 | 1 | 76375000 | 14960 | nofs | nofs |
| chr17 | T | 17q25 | 1 | 76625000 | 11209 | nofs | nofs |
| chr17 | T | 17q25 | 1 | 76875000 | 6988  | nofs | nofs |
| chr17 | T | 17q25 | 1 | 77125000 | 7605  | nofs | nofs |
| chr17 | T | 17q25 | 1 | 77375000 | 4341  | nofs | nofs |
| chr17 | T | 17q25 | 1 | 77625000 | 15617 | nofs | nofs |
| chr17 | T | 17q25 | 1 | 77875000 | 20154 | nofs | nofs |
| chr17 | T | 17q25 | 1 | 78125000 | 13774 | nofs | nofs |
| chr17 | T | 17q25 | 1 | 78375000 | 18989 | nofs | nofs |

|       |   |          |   |         |       |      |      |
|-------|---|----------|---|---------|-------|------|------|
| chr18 | T | 18p11.32 | 1 | 125000  | 12930 | nofs | nofs |
| chr18 | T | 18p11.32 | 1 | 375000  | 1722  | nofs | nofs |
| chr18 | T | 18p11.32 | 1 | 625000  | 5835  | nofs | nofs |
| chr18 | T | 18p11.32 | 1 | 875000  | 2758  | nofs | nofs |
| chr18 | T | 18p11.32 | 1 | 1125000 | 2487  | nofs | nofs |
| chr18 | T | 18p11.32 | 1 | 1375000 | 2576  | nofs | nofs |
| chr18 | T | 18p11.32 | 1 | 1625000 | 4335  | nofs | nofs |
| chr18 | T | 18p11.32 | 1 | 1875000 | 3506  | nofs | nofs |
| chr18 | T | 18p11.32 | 1 | 2125000 | 1888  | nofs | nofs |
| chr18 | T | 18p11.32 | 1 | 2375000 | 2349  | nofs | nofs |
| chr18 | T | 18p11.32 | 1 | 2625000 | 2479  | nofs | nofs |
| chr18 | T | 18p11.32 | 1 | 2875000 | 2898  | nofs | nofs |
| chr18 | T | 18p11.31 | . | 3125000 | 2770  | nofs | nofs |
| chr18 | T | 18p11.31 | . | 3375000 | 2444  | nofs | nofs |
| chr18 | B | 18p11.31 | . | 3625000 | 6192  | nofs | nofs |
| chr18 | B | 18p11.31 | . | 3875000 | 2421  | nofs | nofs |
| chr18 | B | 18p11.31 | . | 4125000 | 2403  | nofs | nofs |
| chr18 | B | 18p11.31 | . | 4375000 | 1698  | nofs | nofs |
| chr18 | B | 18p11.31 | . | 4625000 | 2373  | nofs | nofs |
| chr18 | B | 18p11.31 | . | 4875000 | 1803  | nofs | nofs |
| chr18 | B | 18p11.31 | . | 5125000 | 2526  | nofs | nofs |
| chr18 | B | 18p11.31 | . | 5375000 | 3813  | nofs | nofs |
| chr18 | B | 18p11.31 | . | 5625000 | 2187  | nofs | nofs |
| chr18 | B | 18p11.31 | . | 5875000 | 2396  | nofs | nofs |
| chr18 | B | 18p11.31 | . | 6125000 | 2024  | nofs | nofs |
| chr18 | B | 18p11.31 | . | 6375000 | 3729  | nofs | nofs |
| chr18 | B | 18p11.31 | . | 6625000 | 2263  | nofs | nofs |
| chr18 | B | 18p11.31 | . | 6875000 | 2886  | nofs | nofs |
| chr18 | E | 18p11.2  | 4 | 7125000 | 3691  | nofs | nofs |
| chr18 | E | 18p11.2  | 4 | 7375000 | 3121  | nofs | nofs |
| chr18 | E | 18p11.2  | 4 | 7625000 | 1939  | nofs | nofs |
| chr18 | E | 18p11.2  | 4 | 7875000 | 2428  | nofs | nofs |
| chr18 | E | 18p11.2  | 4 | 8125000 | 1890  | nofs | nofs |
| chr18 | E | 18p11.2  | 4 | 8375000 | 2012  | nofs | nofs |
| chr18 | E | 18p11.2  | 4 | 8625000 | 2623  | nofs | nofs |
| chr18 | E | 18p11.2  | 4 | 8875000 | 2303  | nofs | nofs |

|       |   |         |   |          |       |      |      |
|-------|---|---------|---|----------|-------|------|------|
| chr18 | E | 18p11.2 | 4 | 9125000  | 2516  | nofs | nofs |
| chr18 | E | 18p11.2 | 4 | 9375000  | 4449  | nofs | nofs |
| chr18 | E | 18p11.2 | 4 | 9625000  | 2575  | nofs | nofs |
| chr18 | E | 18p11.2 | 4 | 9875000  | 6086  | nofs | nofs |
| chr18 | E | 18p11.2 | 4 | 10125000 | 2548  | nofs | nofs |
| chr18 | E | 18p11.2 | 4 | 10375000 | 3814  | nofs | nofs |
| chr18 | E | 18p11.2 | 4 | 10625000 | 4066  | nofs | nofs |
| chr18 | E | 18p11.2 | 4 | 10875000 | 3482  | nofs | nofs |
| chr18 | E | 18p11.2 | 4 | 11125000 | 4512  | nofs | nofs |
| chr18 | E | 18p11.2 | 4 | 11375000 | 2202  | nofs | nofs |
| chr18 | E | 18p11.2 | 4 | 11625000 | 6405  | nofs | nofs |
| chr18 | E | 18p11.2 | 4 | 11875000 | 7884  | nofs | nofs |
| chr18 | E | 18p11.2 | 4 | 12125000 | 3343  | nofs | nofs |
| chr18 | C | 18p11.2 | 4 | 12375000 | 5219  | nofs | nofs |
| chr18 | C | 18p11.2 | 4 | 12625000 | 3127  | nofs | nofs |
| chr18 | C | 18p11.2 | 4 | 12875000 | 6536  | nofs | nofs |
| chr18 | C | 18p11.2 | 4 | 13125000 | 2885  | nofs | nofs |
| chr18 | C | 18p11.2 | 4 | 13375000 | 6296  | nofs | nofs |
| chr18 | C | 18p11.2 | 4 | 13625000 | 6094  | nofs | nofs |
| chr18 | C | 18p11.2 | 4 | 13875000 | 3506  | nofs | nofs |
| chr18 | C | 18p11.2 | 4 | 14125000 | 7056  | nofs | nofs |
| chr18 | C | 18p11.2 | 4 | 14375000 | 2793  | nofs | nofs |
| chr18 | C | 18p11.2 | 4 | 14625000 | 4082  | nofs | nofs |
| chr18 | C | 18p11.2 | 4 | 14875000 | 8463  | nofs | nofs |
| chr18 | C | 18p11.2 | 4 | 15125000 | 15501 | nofs | nofs |
| chr18 | C | 18p11.2 | 4 | 15375000 | 30167 | nofs | nofs |
| chr18 | C | 18p11.1 | . | 15625000 | 0     | nofs | nofs |
| chr18 | C | 18p11.1 | . | 15875000 | 0     | nofs | nofs |
| chr18 | C |         | . | 16125000 | 0     | nofs | nofs |
| chr18 | C |         | . | 16375000 | 0     | nofs | nofs |
| chr18 | C |         | . | 16625000 | 0     | nofs | nofs |
| chr18 | C | 18q11.1 | . | 16875000 | 12757 | nofs | nofs |
| chr18 | C | 18q11.1 | . | 17125000 | 2975  | nofs | nofs |
| chr18 | C | 18q11.1 | . | 17375000 | 3760  | nofs | nofs |
| chr18 | C | 18q11.1 | . | 17625000 | 2583  | nofs | nofs |
| chr18 | C | 18q11.2 | 2 | 17875000 | 3854  | nofs | nofs |

|       |   |         |   |          |      |      |      |
|-------|---|---------|---|----------|------|------|------|
| chr18 | C | 18q11.2 | 2 | 18125000 | 4531 | nofs | nofs |
| chr18 | C | 18q11.2 | 2 | 18375000 | 1748 | nofs | nofs |
| chr18 | C | 18q11.2 | 2 | 18625000 | 2993 | nofs | nofs |
| chr18 | C | 18q11.2 | 2 | 18875000 | 3618 | nofs | nofs |
| chr18 | C | 18q11.2 | 2 | 19125000 | 3076 | nofs | nofs |
| chr18 | C | 18q11.2 | 2 | 19375000 | 3743 | nofs | nofs |
| chr18 | C | 18q11.2 | 2 | 19625000 | 2224 | nofs | nofs |
| chr18 | C | 18q11.2 | 2 | 19875000 | 2289 | nofs | nofs |
| chr18 | E | 18q11.2 | 2 | 20125000 | 2452 | nofs | nofs |
| chr18 | E | 18q11.2 | 2 | 20375000 | 1902 | nofs | nofs |
| chr18 | E | 18q11.2 | 2 | 20625000 | 2728 | nofs | nofs |
| chr18 | E | 18q11.2 | 2 | 20875000 | 3392 | nofs | nofs |
| chr18 | E | 18q11.2 | 2 | 21125000 | 1885 | nofs | nofs |
| chr18 | E | 18q11.2 | 2 | 21375000 | 1679 | nofs | nofs |
| chr18 | E | 18q11.2 | 2 | 21625000 | 1625 | nofs | nofs |
| chr18 | E | 18q11.2 | 2 | 21875000 | 2275 | nofs | nofs |
| chr18 | E | 18q11.2 | 2 | 22125000 | 3990 | nofs | nofs |
| chr18 | E | 18q11.2 | 2 | 22375000 | 2595 | nofs | nofs |
| chr18 | E | 18q11.2 | 2 | 22625000 | 6014 | nofs | nofs |
| chr18 | E | 18q11.2 | 2 | 22875000 | 1670 | nofs | nofs |
| chr18 | E | 18q11.2 | 2 | 23125000 | 2632 | nofs | nofs |
| chr18 | E | 18q11.2 | 2 | 23375000 | 1423 | nofs | nofs |
| chr18 | B | 18q12.1 | . | 23625000 | 3266 | nofs | nofs |
| chr18 | B | 18q12.1 | . | 23875000 | 2958 | nofs | nofs |
| chr18 | B | 18q12.1 | . | 24125000 | 1827 | nofs | nofs |
| chr18 | B | 18q12.1 | . | 24375000 | 2257 | nofs | nofs |
| chr18 | B | 18q12.1 | . | 24625000 | 3295 | nofs | nofs |
| chr18 | B | 18q12.1 | . | 24875000 | 1638 | nofs | nofs |
| chr18 | B | 18q12.1 | . | 25125000 | 3063 | nofs | nofs |
| chr18 | B | 18q12.1 | . | 25375000 | 4834 | nofs | nofs |
| chr18 | B | 18q12.1 | . | 25625000 | 3463 | nofs | nofs |
| chr18 | B | 18q12.1 | . | 25875000 | 2530 | nofs | nofs |
| chr18 | B | 18q12.1 | . | 26125000 | 2675 | nofs | nofs |
| chr18 | B | 18q12.1 | . | 26375000 | 3938 | nofs | nofs |
| chr18 | B | 18q12.1 | . | 26625000 | 2636 | nofs | nofs |
| chr18 | B | 18q12.1 | . | 26875000 | 3040 | nofs | nofs |



|       |   |         |   |          |      |      |           |
|-------|---|---------|---|----------|------|------|-----------|
| chr18 | B | 18q12.1 | . | 27125000 | 2947 | nofs | nofs      |
| chr18 | B | 18q12.1 | . | 27375000 | 1692 | nofs | nofs      |
| chr18 | B | 18q12.1 | . | 27625000 | 2345 | nofs | nofs      |
| chr18 | B | 18q12.1 | . | 27875000 | 6428 | nofs | nofs      |
| chr18 | B | 18q12.1 | . | 28125000 | 2385 | nofs | nofs      |
| chr18 | B | 18q12.1 | . | 28375000 | 1516 | nofs | nofs      |
| chr18 | B | 18q12.1 | . | 28625000 | 3270 | nofs | nofs      |
| chr18 | B | 18q12.1 | . | 28875000 | 1954 | nofs | nofs      |
| chr18 | B | 18q12.1 | . | 29125000 | 2919 | nofs | nofs      |
| chr18 | B | 18q12.1 | . | 29375000 | 1477 | nofs | nofs      |
| chr18 | B | 18q12.1 | . | 29625000 | 3306 | nofs | nofs      |
| chr18 | B | 18q12.1 | . | 29875000 | 1787 | nofs | nofs      |
| chr18 | B | 18q12.1 | . | 30125000 | 2417 | nofs | nofs      |
| chr18 | B | 18q12.1 | . | 30375000 | 1464 | nofs | nofs      |
| chr18 | B | 18q12.1 | . | 30625000 | 1501 | nofs | nofs      |
| chr18 | E | 18q12.2 | 2 | 30875000 | 2639 | fs   | fs common |
| chr18 | E | 18q12.2 | 2 | 31125000 | 4347 | fs   | fs common |
| chr18 | E | 18q12.2 | 2 | 31375000 | 2061 | fs   | fs common |
| chr18 | E | 18q12.2 | 2 | 31625000 | 1454 | fs   | fs common |
| chr18 | E | 18q12.2 | 2 | 31875000 | 3112 | fs   | fs common |
| chr18 | E | 18q12.2 | 2 | 32125000 | 2014 | fs   | fs common |
| chr18 | E | 18q12.2 | 2 | 32375000 | 2072 | fs   | fs common |
| chr18 | E | 18q12.2 | 2 | 32625000 | 2405 | fs   | fs common |
| chr18 | E | 18q12.2 | 2 | 32875000 | 1801 | fs   | fs common |
| chr18 | E | 18q12.2 | 2 | 33125000 | 3410 | fs   | fs common |
| chr18 | E | 18q12.2 | 2 | 33375000 | 2372 | fs   | fs common |
| chr18 | E | 18q12.2 | 2 | 33625000 | 2608 | fs   | fs common |
| chr18 | E | 18q12.2 | 2 | 33875000 | 1694 | fs   | fs common |
| chr18 | E | 18q12.2 | 2 | 34125000 | 1777 | fs   | fs common |
| chr18 | E | 18q12.2 | 2 | 34375000 | 2711 | fs   | fs common |
| chr18 | E | 18q12.2 | 2 | 34625000 | 2062 | fs   | fs common |
| chr18 | E | 18q12.2 | 2 | 34875000 | 2868 | fs   | fs common |
| chr18 | E | 18q12.2 | 2 | 35125000 | 3939 | fs   | fs common |
| chr18 | E | 18q12.2 | 2 | 35375000 | 2907 | fs   | fs common |
| chr18 | E | 18q12.2 | 2 | 35625000 | 4128 | fs   | fs common |
| chr18 | E | 18q12.3 | 4 | 35875000 | 2913 | nofs | nofs      |

|       |   |         |   |          |      |      |      |
|-------|---|---------|---|----------|------|------|------|
| chr18 | E | 18q12.3 | 4 | 36125000 | 2610 | nofs | nofs |
| chr18 | E | 18q12.3 | 4 | 36375000 | 3448 | nofs | nofs |
| chr18 | E | 18q12.3 | 4 | 36625000 | 3245 | nofs | nofs |
| chr18 | E | 18q12.3 | 4 | 36875000 | 2132 | nofs | nofs |
| chr18 | E | 18q12.3 | 4 | 37125000 | 2635 | nofs | nofs |
| chr18 | E | 18q12.3 | 4 | 37375000 | 2976 | nofs | nofs |
| chr18 | E | 18q12.3 | 4 | 37625000 | 1659 | nofs | nofs |
| chr18 | E | 18q12.3 | 4 | 37875000 | 2207 | nofs | nofs |
| chr18 | E | 18q12.3 | 4 | 38125000 | 1724 | nofs | nofs |
| chr18 | E | 18q12.3 | 4 | 38375000 | 2746 | nofs | nofs |
| chr18 | E | 18q12.3 | 4 | 38625000 | 1931 | nofs | nofs |
| chr18 | E | 18q12.3 | 4 | 38875000 | 2208 | nofs | nofs |
| chr18 | E | 18q12.3 | 4 | 39125000 | 2816 | nofs | nofs |
| chr18 | E | 18q12.3 | 4 | 39375000 | 2725 | nofs | nofs |
| chr18 | E | 18q12.3 | 4 | 39625000 | 2032 | nofs | nofs |
| chr18 | E | 18q12.3 | 4 | 39875000 | 2965 | nofs | nofs |
| chr18 | E | 18q12.3 | 4 | 40125000 | 3612 | nofs | nofs |
| chr18 | E | 18q12.3 | 4 | 40375000 | 3130 | nofs | nofs |
| chr18 | E | 18q12.3 | 4 | 40625000 | 2521 | nofs | nofs |
| chr18 | E | 18q12.3 | 4 | 40875000 | 1624 | nofs | nofs |
| chr18 | E | 18q12.3 | 4 | 41125000 | 2660 | nofs | nofs |
| chr18 | E | 18q12.3 | 4 | 41375000 | 1405 | nofs | nofs |
| chr18 | E | 18q12.3 | 4 | 41625000 | 2338 | nofs | nofs |
| chr18 | E | 18q12.3 | 4 | 41875000 | 4249 | nofs | nofs |
| chr18 | E | 18q21.1 | 4 | 42125000 | 4784 | nofs | nofs |
| chr18 | E | 18q21.1 | 4 | 42375000 | 3149 | nofs | nofs |
| chr18 | E | 18q21.1 | 4 | 42625000 | 2911 | nofs | nofs |
| chr18 | E | 18q21.1 | 4 | 42875000 | 2097 | nofs | nofs |
| chr18 | E | 18q21.1 | 4 | 43125000 | 4829 | nofs | nofs |
| chr18 | E | 18q21.1 | 4 | 43375000 | 3046 | nofs | nofs |
| chr18 | E | 18q21.1 | 4 | 43625000 | 3382 | nofs | nofs |
| chr18 | E | 18q21.1 | 4 | 43875000 | 4591 | nofs | nofs |
| chr18 | E | 18q21.1 | 4 | 44125000 | 3303 | nofs | nofs |
| chr18 | E | 18q21.1 | 4 | 44375000 | 5371 | nofs | nofs |
| chr18 | E | 18q21.1 | 4 | 44625000 | 4947 | nofs | nofs |
| chr18 | E | 18q21.1 | 4 | 44875000 | 5346 | nofs | nofs |

|       |   |         |   |          |      |      |           |
|-------|---|---------|---|----------|------|------|-----------|
| chr18 | E | 18q21.1 | 4 | 45125000 | 4038 | nofs | nofs      |
| chr18 | E | 18q21.1 | 4 | 45375000 | 4507 | nofs | nofs      |
| chr18 | E | 18q21.1 | 4 | 45625000 | 2531 | nofs | nofs      |
| chr18 | E | 18q21.1 | 4 | 45875000 | 1882 | nofs | nofs      |
| chr18 | E | 18q21.1 | 4 | 46125000 | 3133 | nofs | nofs      |
| chr18 | E | 18q21.1 | 4 | 46375000 | 1676 | nofs | nofs      |
| chr18 | E | 18q21.1 | 4 | 46625000 | 2464 | nofs | nofs      |
| chr18 | E | 18q21.1 | 4 | 46875000 | 4288 | nofs | nofs      |
| chr18 | E | 18q21.1 | 4 | 47125000 | 3749 | nofs | nofs      |
| chr18 | E | 18q21.1 | 4 | 47375000 | 2826 | nofs | nofs      |
| chr18 | E | 18q21.1 | 4 | 47625000 | 1311 | nofs | nofs      |
| chr18 | E | 18q21.1 | 4 | 47875000 | 2033 | nofs | nofs      |
| chr18 | E | 18q21.1 | 4 | 48125000 | 2914 | nofs | nofs      |
| chr18 | E | 18q21.1 | 4 | 48375000 | 2796 | nofs | nofs      |
| chr18 | E | 18q21.1 | 4 | 48625000 | 1981 | nofs | nofs      |
| chr18 | B | 18q21.2 | . | 48875000 | 3426 | nofs | nofs      |
| chr18 | B | 18q21.2 | . | 49125000 | 3887 | nofs | nofs      |
| chr18 | B | 18q21.2 | . | 49375000 | 1806 | nofs | nofs      |
| chr18 | B | 18q21.2 | . | 49625000 | 2317 | nofs | nofs      |
| chr18 | B | 18q21.2 | . | 49875000 | 2304 | nofs | nofs      |
| chr18 | B | 18q21.2 | . | 50125000 | 3558 | nofs | nofs      |
| chr18 | B | 18q21.2 | . | 50375000 | 1605 | nofs | nofs      |
| chr18 | B | 18q21.2 | . | 50625000 | 3141 | nofs | nofs      |
| chr18 | B | 18q21.2 | . | 50875000 | 2297 | nofs | nofs      |
| chr18 | B | 18q21.2 | . | 51125000 | 1901 | nofs | nofs      |
| chr18 | B | 18q21.2 | . | 51375000 | 2969 | nofs | nofs      |
| chr18 | B | 18q21.2 | . | 51625000 | 1894 | nofs | nofs      |
| chr18 | B | 18q21.2 | . | 51875000 | 1315 | nofs | nofs      |
| chr18 | B | 18q21.2 | . | 52125000 | 3998 | nofs | nofs      |
| chr18 | B | 18q21.2 | . | 52375000 | 2716 | nofs | nofs      |
| chr18 | E | 18q21.3 | 4 | 52625000 | 1698 | fs   | fs common |
| chr18 | E | 18q21.3 | 4 | 52875000 | 2408 | fs   | fs common |
| chr18 | E | 18q21.3 | 4 | 53125000 | 4120 | fs   | fs common |
| chr18 | E | 18q21.3 | 4 | 53375000 | 6220 | fs   | fs common |
| chr18 | E | 18q21.3 | 4 | 53625000 | 3933 | fs   | fs common |
| chr18 | E | 18q21.3 | 4 | 53875000 | 5400 | fs   | fs common |

|       |   |         |   |          |      |    |           |
|-------|---|---------|---|----------|------|----|-----------|
| chr18 | E | 18q21.3 | 4 | 54125000 | 4214 | fs | fs common |
| chr18 | E | 18q21.3 | 4 | 54375000 | 5020 | fs | fs common |
| chr18 | E | 18q21.3 | 4 | 54625000 | 1894 | fs | fs common |
| chr18 | E | 18q21.3 | 4 | 54875000 | 3724 | fs | fs common |
| chr18 | E | 18q21.3 | 4 | 55125000 | 4476 | fs | fs common |
| chr18 | E | 18q21.3 | 4 | 55375000 | 1821 | fs | fs common |
| chr18 | E | 18q21.3 | 4 | 55625000 | 5397 | fs | fs common |
| chr18 | E | 18q21.3 | 4 | 55875000 | 2461 | fs | fs common |
| chr18 | E | 18q21.3 | 4 | 56125000 | 1351 | fs | fs common |
| chr18 | E | 18q21.3 | 4 | 56375000 | 2254 | fs | fs common |
| chr18 | E | 18q21.3 | 4 | 56625000 | 2263 | fs | fs common |
| chr18 | E | 18q21.3 | 4 | 56875000 | 4128 | fs | fs common |
| chr18 | E | 18q21.3 | 4 | 57125000 | 1797 | fs | fs common |
| chr18 | E | 18q21.3 | 4 | 57375000 | 1988 | fs | fs common |
| chr18 | E | 18q21.3 | 4 | 57625000 | 2240 | fs | fs common |
| chr18 | E | 18q21.3 | 4 | 57875000 | 5463 | fs | fs common |
| chr18 | E | 18q21.3 | 4 | 58125000 | 1609 | fs | fs common |
| chr18 | E | 18q21.3 | 4 | 58375000 | 3097 | fs | fs common |
| chr18 | E | 18q21.3 | 4 | 58625000 | 3416 | fs | fs common |
| chr18 | E | 18q21.3 | 4 | 58875000 | 4225 | fs | fs common |
| chr18 | E | 18q21.3 | 4 | 59125000 | 3099 | fs | fs common |
| chr18 | E | 18q21.3 | 4 | 59375000 | 3887 | fs | fs common |
| chr18 | E | 18q21.3 | 4 | 59625000 | 3088 | fs | fs common |
| chr18 | E | 18q21.3 | 4 | 59875000 | 4675 | fs | fs common |
| chr18 | E | 18q22   | 4 | 60125000 | 1946 | fs | fs rare   |
| chr18 | E | 18q22   | 4 | 60375000 | 3477 | fs | fs rare   |
| chr18 | E | 18q22   | 4 | 60625000 | 2191 | fs | fs rare   |
| chr18 | E | 18q22   | 4 | 60875000 | 2816 | fs | fs rare   |
| chr18 | E | 18q22   | 4 | 61125000 | 2702 | fs | fs rare   |
| chr18 | E | 18q22   | 4 | 61375000 | 3549 | fs | fs rare   |
| chr18 | E | 18q22   | 4 | 61625000 | 4110 | fs | fs rare   |
| chr18 | E | 18q22   | 4 | 61875000 | 3464 | fs | fs rare   |
| chr18 | E | 18q22   | 4 | 62125000 | 2275 | fs | fs rare   |
| chr18 | E | 18q22   | 4 | 62375000 | 2825 | fs | fs rare   |
| chr18 | E | 18q22   | 4 | 62625000 | 2822 | fs | fs rare   |
| chr18 | E | 18q22   | 4 | 62875000 | 3780 | fs | fs rare   |

|       |   |       |   |          |      |      |         |
|-------|---|-------|---|----------|------|------|---------|
| chr18 | E | 18q22 | 4 | 63125000 | 4425 | fs   | fs rare |
| chr18 | E | 18q22 | 4 | 63375000 | 2615 | fs   | fs rare |
| chr18 | E | 18q22 | 4 | 63625000 | 2911 | fs   | fs rare |
| chr18 | E | 18q22 | 4 | 63875000 | 2533 | fs   | fs rare |
| chr18 | E | 18q22 | 4 | 64125000 | 3098 | fs   | fs rare |
| chr18 | E | 18q22 | 4 | 64375000 | 2984 | fs   | fs rare |
| chr18 | E | 18q22 | 4 | 64625000 | 3584 | fs   | fs rare |
| chr18 | E | 18q22 | 4 | 64875000 | 3339 | fs   | fs rare |
| chr18 | E | 18q22 | 4 | 65125000 | 2085 | nofs | nofs    |
| chr18 | E | 18q22 | 4 | 65375000 | 3558 | nofs | nofs    |
| chr18 | E | 18q22 | 4 | 65625000 | 3430 | nofs | nofs    |
| chr18 | E | 18q22 | 4 | 65875000 | 3774 | nofs | nofs    |
| chr18 | E | 18q22 | 4 | 66125000 | 3308 | nofs | nofs    |
| chr18 | E | 18q22 | 4 | 66375000 | 3397 | nofs | nofs    |
| chr18 | E | 18q22 | 4 | 66625000 | 1766 | nofs | nofs    |
| chr18 | E | 18q22 | 4 | 66875000 | 3043 | nofs | nofs    |
| chr18 | E | 18q22 | 4 | 67125000 | 3359 | nofs | nofs    |
| chr18 | E | 18q22 | 4 | 67375000 | 3780 | nofs | nofs    |
| chr18 | E | 18q22 | 4 | 67625000 | 1975 | nofs | nofs    |
| chr18 | E | 18q22 | 4 | 67875000 | 1883 | nofs | nofs    |
| chr18 | E | 18q22 | 4 | 68125000 | 3240 | nofs | nofs    |
| chr18 | E | 18q22 | 4 | 68375000 | 2909 | nofs | nofs    |
| chr18 | E | 18q22 | 4 | 68625000 | 2420 | nofs | nofs    |
| chr18 | E | 18q22 | 4 | 68875000 | 2304 | nofs | nofs    |
| chr18 | E | 18q22 | 4 | 69125000 | 3661 | nofs | nofs    |
| chr18 | E | 18q22 | 4 | 69375000 | 3106 | nofs | nofs    |
| chr18 | E | 18q22 | 4 | 69625000 | 2577 | nofs | nofs    |
| chr18 | E | 18q22 | 4 | 69875000 | 3569 | nofs | nofs    |
| chr18 | E | 18q22 | 4 | 70125000 | 5236 | nofs | nofs    |
| chr18 | E | 18q22 | 4 | 70375000 | 4213 | nofs | nofs    |
| chr18 | E | 18q22 | 4 | 70625000 | 2497 | nofs | nofs    |
| chr18 | E | 18q22 | 4 | 70875000 | 8618 | nofs | nofs    |
| chr18 | E | 18q22 | 4 | 71125000 | 4369 | nofs | nofs    |
| chr18 | E | 18q22 | 4 | 71375000 | 2587 | nofs | nofs    |
| chr18 | E | 18q22 | 1 | 71625000 | 4387 | nofs | nofs    |
| chr18 | E | 18q23 | 1 | 71875000 | 3033 | nofs | nofs    |

|       |   |         |   |          |       |         |         |
|-------|---|---------|---|----------|-------|---------|---------|
| chr18 | E | 18q23   | 1 | 72125000 | 8140  | nofs    | nofs    |
| chr18 | E | 18q23   | 1 | 72375000 | 10148 | nofs    | nofs    |
| chr18 | T | 18q23   | 1 | 72625000 | 10398 | nofs    | nofs    |
| chr18 | T | 18q23   | 1 | 72875000 | 9922  | nofs    | nofs    |
| chr18 | T | 18q23   | 1 | 73125000 | 5682  | nofs    | nofs    |
| chr18 | T | 18q23   | 1 | 73375000 | 6506  | nofs    | nofs    |
| chr18 | T | 18q23   | 1 | 73625000 | 9145  | nofs    | nofs    |
| chr18 | T | 18q23   | 1 | 73875000 | 9596  | nofs    | nofs    |
| chr18 | T | 18q23   | 1 | 74125000 | 9569  | nofs    | nofs    |
| chr18 | T | 18q23   | 1 | 74375000 | 26053 | nofs    | nofs    |
| chr18 | T | 18q23   | 1 | 74625000 | 29856 | nofs    | nofs    |
| chr18 | T | 18q23   | 1 | 74875000 | 20960 | nofs    | nofs    |
| chr18 | T | 18q23   | 1 | 75125000 | 20374 | nofs    | nofs    |
| chr18 | T | 18q23   | 1 | 75375000 | 34164 | nofs    | nofs    |
| chr18 | T | 18q23   | 1 | 75625000 | 32364 | nofs    | nofs    |
| chr19 | T | 19p13.3 | 4 | 125000   | 10359 | fs rare | fs rare |
| chr19 | T | 19p13.3 | 4 | 375000   | 53056 | fs rare | fs rare |
| chr19 | T | 19p13.3 | 4 | 625000   | 19058 | fs rare | fs rare |
| chr19 | T | 19p13.3 | 4 | 875000   | 18961 | fs rare | fs rare |
| chr19 | T | 19p13.3 | 4 | 1125000  | 16430 | fs rare | fs rare |
| chr19 | T | 19p13.3 | 4 | 1375000  | 11604 | fs rare | fs rare |
| chr19 | T | 19p13.3 | 4 | 1625000  | 13328 | fs rare | fs rare |
| chr19 | T | 19p13.3 | 4 | 1875000  | 11631 | fs rare | fs rare |
| chr19 | T | 19p13.3 | 4 | 2125000  | 9985  | fs rare | fs rare |
| chr19 | T | 19p13.3 | 4 | 2375000  | 18872 | fs rare | fs rare |
| chr19 | T | 19p13.3 | 4 | 2625000  | 15803 | fs rare | fs rare |
| chr19 | T | 19p13.3 | 4 | 2875000  | 14025 | fs rare | fs rare |
| chr19 | T | 19p13.3 | 4 | 3125000  | 17568 | fs rare | fs rare |
| chr19 | E | 19p13.3 | 4 | 3375000  | 16009 | fs rare | fs rare |
| chr19 | E | 19p13.3 | 4 | 3625000  | 11995 | fs rare | fs rare |
| chr19 | E | 19p13.3 | 4 | 3875000  | 9045  | fs rare | fs rare |
| chr19 | E | 19p13.3 | 4 | 4125000  | 11278 | fs rare | fs rare |
| chr19 | E | 19p13.3 | 4 | 4375000  | 14170 | fs rare | fs rare |
| chr19 | E | 19p13.3 | 4 | 4625000  | 9935  | fs rare | fs rare |
| chr19 | E | 19p13.3 | 4 | 4875000  | 11525 | fs rare | fs rare |
| chr19 | E | 19p13.3 | 4 | 5125000  | 9521  | fs rare | fs rare |

|       |   |         |   |          |       |    |         |
|-------|---|---------|---|----------|-------|----|---------|
| chr19 | E | 19p13.3 | 4 | 5375000  | 8927  | fs | fs rare |
| chr19 | E | 19p13.3 | 4 | 5625000  | 9006  | fs | fs rare |
| chr19 | E | 19p13.3 | 4 | 5875000  | 6896  | fs | fs rare |
| chr19 | E | 19p13.3 | 4 | 6125000  | 7878  | fs | fs rare |
| chr19 | E | 19p13.3 | 4 | 6375000  | 8140  | fs | fs rare |
| chr19 | E | 19p13.3 | 4 | 6625000  | 13414 | fs | fs rare |
| chr19 | E | 19p13.3 | 4 | 6875000  | 9585  | fs | fs rare |
| chr19 | E | 19p13.2 | 4 | 7125000  | 13454 | fs | fs rare |
| chr19 | E | 19p13.2 | 4 | 7375000  | 12583 | fs | fs rare |
| chr19 | E | 19p13.2 | 4 | 7625000  | 11427 | fs | fs rare |
| chr19 | E | 19p13.2 | 4 | 7875000  | 8312  | fs | fs rare |
| chr19 | E | 19p13.2 | 4 | 8125000  | 11694 | fs | fs rare |
| chr19 | E | 19p13.2 | 4 | 8375000  | 9710  | fs | fs rare |
| chr19 | E | 19p13.2 | 4 | 8625000  | 12866 | fs | fs rare |
| chr19 | E | 19p13.2 | 4 | 8875000  | 7076  | fs | fs rare |
| chr19 | E | 19p13.2 | 4 | 9125000  | 8802  | fs | fs rare |
| chr19 | E | 19p13.2 | 4 | 9375000  | 5950  | fs | fs rare |
| chr19 | E | 19p13.2 | 4 | 9625000  | 8247  | fs | fs rare |
| chr19 | E | 19p13.2 | 4 | 9875000  | 11870 | fs | fs rare |
| chr19 | E | 19p13.2 | 4 | 10125000 | 7594  | fs | fs rare |
| chr19 | E | 19p13.2 | 4 | 10375000 | 9712  | fs | fs rare |
| chr19 | E | 19p13.2 | 4 | 10625000 | 8002  | fs | fs rare |
| chr19 | E | 19p13.2 | 4 | 10875000 | 5564  | fs | fs rare |
| chr19 | E | 19p13.2 | 4 | 11125000 | 8463  | fs | fs rare |
| chr19 | E | 19p13.2 | 4 | 11375000 | 7401  | fs | fs rare |
| chr19 | E | 19p13.2 | 4 | 11625000 | 8192  | fs | fs rare |
| chr19 | E | 19p13.2 | 4 | 11875000 | 11842 | fs | fs rare |
| chr19 | E | 19p13.2 | 4 | 12125000 | 12704 | fs | fs rare |
| chr19 | E | 19p13.2 | 4 | 12375000 | 11269 | fs | fs rare |
| chr19 | E | 19p13.2 | 4 | 12625000 | 5448  | fs | fs rare |
| chr19 | E | 19p13.1 | 5 | 12875000 | 5654  | fs | fs rare |
| chr19 | E | 19p13.1 | 5 | 13125000 | 5990  | fs | fs rare |
| chr19 | E | 19p13.1 | 5 | 13375000 | 6940  | fs | fs rare |
| chr19 | E | 19p13.1 | 5 | 13625000 | 9799  | fs | fs rare |
| chr19 | E | 19p13.1 | 5 | 13875000 | 9158  | fs | fs rare |
| chr19 | E | 19p13.1 | 5 | 14125000 | 8462  | fs | fs rare |

|       |   |         |   |          |       |      |         |
|-------|---|---------|---|----------|-------|------|---------|
| chr19 | E | 19p13.1 | 5 | 14375000 | 7238  | fs   | fs rare |
| chr19 | E | 19p13.1 | 5 | 14625000 | 10168 | fs   | fs rare |
| chr19 | E | 19p13.1 | 5 | 14875000 | 3194  | fs   | fs rare |
| chr19 | E | 19p13.1 | 5 | 15125000 | 6714  | fs   | fs rare |
| chr19 | E | 19p13.1 | 5 | 15375000 | 5661  | fs   | fs rare |
| chr19 | E | 19p13.1 | 5 | 15625000 | 9097  | fs   | fs rare |
| chr19 | E | 19p13.1 | 5 | 15875000 | 12970 | fs   | fs rare |
| chr19 | E | 19p13.1 | 5 | 16125000 | 8526  | fs   | fs rare |
| chr19 | E | 19p13.1 | 5 | 16375000 | 6427  | fs   | fs rare |
| chr19 | E | 19p13.1 | 5 | 16625000 | 7211  | fs   | fs rare |
| chr19 | E | 19p13.1 | 5 | 16875000 | 8802  | fs   | fs rare |
| chr19 | E | 19p13.1 | 5 | 17125000 | 5543  | fs   | fs rare |
| chr19 | E | 19p13.1 | 5 | 17375000 | 10722 | fs   | fs rare |
| chr19 | E | 19p13.1 | 5 | 17625000 | 8175  | fs   | fs rare |
| chr19 | E | 19p13.1 | 5 | 17875000 | 8771  | fs   | fs rare |
| chr19 | E | 19p13.1 | 5 | 18125000 | 7694  | fs   | fs rare |
| chr19 | E | 19p13.1 | 5 | 18375000 | 5573  | fs   | fs rare |
| chr19 | E | 19p13.1 | 5 | 18625000 | 7165  | fs   | fs rare |
| chr19 | E | 19p13.1 | 5 | 18875000 | 7142  | fs   | fs rare |
| chr19 | E | 19p13.1 | 5 | 19125000 | 6094  | fs   | fs rare |
| chr19 | E | 19p13.1 | 5 | 19375000 | 5174  | fs   | fs rare |
| chr19 | E | 19p13.1 | 5 | 19625000 | 9069  | fs   | fs rare |
| chr19 | E | 19p13.1 | 5 | 19875000 | 6945  | fs   | fs rare |
| chr19 | E | 19p12   | 2 | 20125000 | 8525  | nofs | nofs    |
| chr19 | E | 19p12   | 2 | 20375000 | 6044  | nofs | nofs    |
| chr19 | E | 19p12   | 2 | 20625000 | 8518  | nofs | nofs    |
| chr19 | E | 19p12   | 2 | 20875000 | 56807 | nofs | nofs    |
| chr19 | E | 19p12   | 2 | 21125000 | 9543  | nofs | nofs    |
| chr19 | C | 19p12   | 2 | 21375000 | 13536 | nofs | nofs    |
| chr19 | C | 19p12   | 2 | 21625000 | 8275  | nofs | nofs    |
| chr19 | C | 19p12   | 2 | 21875000 | 10835 | nofs | nofs    |
| chr19 | C | 19p12   | 2 | 22125000 | 8215  | nofs | nofs    |
| chr19 | C | 19p12   | 2 | 22375000 | 10282 | nofs | nofs    |
| chr19 | C | 19p12   | 2 | 22625000 | 9922  | nofs | nofs    |
| chr19 | C | 19p12   | 2 | 22875000 | 7190  | nofs | nofs    |
| chr19 | C | 19p12   | 2 | 23125000 | 8776  | nofs | nofs    |



|       |   |       |   |          |        |      |      |
|-------|---|-------|---|----------|--------|------|------|
| chr19 | C | 19p12 | 2 | 23375000 | 12099  | nofs | nofs |
| chr19 | C | 19p12 | 2 | 23625000 | 7863   | nofs | nofs |
| chr19 | C | 19p12 | 2 | 23875000 | 9896   | nofs | nofs |
| chr19 | C | 19p12 | 2 | 24125000 | 50175  | nofs | nofs |
| chr19 | C | 19p12 | 2 | 24375000 | 144443 | nofs | nofs |
| chr19 | C | 19p11 | . | 24625000 | 0      | nofs | nofs |
| chr19 | C | 19p11 | . | 24875000 | 0      | nofs | nofs |
| chr19 | C | 19p11 | . | 25125000 | 0      | nofs | nofs |
| chr19 | C | 19p11 | . | 25375000 | 0      | nofs | nofs |
| chr19 | C | 19p11 | . | 25625000 | 0      | nofs | nofs |
| chr19 | C | 19p11 | . | 25875000 | 0      | nofs | nofs |
| chr19 | C | 19p11 | . | 26125000 | 0      | nofs | nofs |
| chr19 | C | 19p11 | . | 26375000 | 0      | nofs | nofs |
| chr19 | C | 19p11 | . | 26625000 | 0      | nofs | nofs |
| chr19 | C | 19p11 | . | 26875000 | 0      | nofs | nofs |
| chr19 | C | 19p11 | . | 27125000 | 0      | nofs | nofs |
| chr19 | C | 19p11 | . | 27375000 | 0      | nofs | nofs |
| chr19 | C | 19p11 | . | 27625000 | 0      | nofs | nofs |
| chr19 | C | 19p11 | . | 27875000 | 0      | nofs | nofs |
| chr19 | C | 19p11 | . | 28125000 | 0      | nofs | nofs |
| chr19 | C | 19p11 | . | 28375000 | 0      | nofs | nofs |
| chr19 | C | 19p11 | . | 28625000 | 0      | nofs | nofs |
| chr19 | C | 19p11 | . | 28875000 | 0      | nofs | nofs |
| chr19 | C | 19p11 | . | 29125000 | 0      | nofs | nofs |
| chr19 | C | 19p11 | . | 29375000 | 0      | nofs | nofs |
| chr19 | C | 19p11 | . | 29625000 | 0      | nofs | nofs |
| chr19 | C | 19p11 | . | 29875000 | 0      | nofs | nofs |
| chr19 | C | 19q11 | . | 30125000 | 0      | nofs | nofs |
| chr19 | C | 19q11 | . | 30375000 | 0      | nofs | nofs |
| chr19 | C | 19q11 | . | 30625000 | 0      | nofs | nofs |
| chr19 | C | 19q11 | . | 30875000 | 0      | nofs | nofs |
| chr19 | C | 19q11 | . | 31125000 | 0      | nofs | nofs |
| chr19 | C | 19q11 | . | 31375000 | 0      | nofs | nofs |
| chr19 | C | 19q12 | 0 | 31625000 | 0      | nofs | nofs |
| chr19 | C | 19q12 | 1 | 31875000 | 0      | nofs | nofs |
| chr19 | C | 19q12 | 2 | 32125000 | 0      | nofs | nofs |

|       |   |         |   |          |        |      |           |
|-------|---|---------|---|----------|--------|------|-----------|
| chr19 | C | 19q12   | 3 | 32375000 | 62067  | nofs | nofs      |
| chr19 | C | 19q12   | 3 | 32625000 | 212462 | nofs | nofs      |
| chr19 | C | 19q12   | 3 | 32875000 | 101346 | nofs | nofs      |
| chr19 | C | 19q12   | 3 | 33125000 | 6981   | nofs | nofs      |
| chr19 | C | 19q12   | 3 | 33375000 | 4168   | nofs | nofs      |
| chr19 | C | 19q12   | 3 | 33625000 | 5218   | nofs | nofs      |
| chr19 | C | 19q12   | 3 | 33875000 | 4422   | nofs | nofs      |
| chr19 | C | 19q12   | 3 | 34125000 | 5607   | nofs | nofs      |
| chr19 | C | 19q12   | 3 | 34375000 | 6912   | nofs | nofs      |
| chr19 | C | 19q12   | 3 | 34625000 | 11670  | nofs | nofs      |
| chr19 | C | 19q12   | 3 | 34875000 | 7436   | nofs | nofs      |
| chr19 | C | 19q12   | 3 | 35125000 | 9081   | nofs | nofs      |
| chr19 | C | 19q12   | 3 | 35375000 | 7290   | nofs | nofs      |
| chr19 | E | 19q12   | 3 | 35625000 | 7886   | nofs | nofs      |
| chr19 | E | 19q12   | 3 | 35875000 | 4548   | nofs | nofs      |
| chr19 | E | 19q12   | 3 | 36125000 | 3425   | nofs | nofs      |
| chr19 | E | 19q12   | 3 | 36375000 | 4422   | nofs | nofs      |
| chr19 | E | 19q12   | 3 | 36625000 | 4613   | nofs | nofs      |
| chr19 | E | 19q12   | 3 | 36875000 | 6220   | nofs | nofs      |
| chr19 | E | 19q13.1 | 1 | 37125000 | 4734   | fs   | fs common |
| chr19 | E | 19q13.1 | 1 | 37375000 | 5991   | fs   | fs common |
| chr19 | E | 19q13.1 | 1 | 37625000 | 3763   | fs   | fs common |
| chr19 | E | 19q13.1 | 1 | 37875000 | 7873   | fs   | fs common |
| chr19 | E | 19q13.1 | 1 | 38125000 | 5678   | fs   | fs common |
| chr19 | E | 19q13.1 | 1 | 38375000 | 6028   | fs   | fs common |
| chr19 | E | 19q13.1 | 1 | 38625000 | 4867   | fs   | fs common |
| chr19 | E | 19q13.1 | 1 | 38875000 | 5057   | fs   | fs common |
| chr19 | E | 19q13.1 | 1 | 39125000 | 5815   | fs   | fs common |
| chr19 | E | 19q13.1 | 1 | 39375000 | 6875   | fs   | fs common |
| chr19 | E | 19q13.1 | 1 | 39625000 | 5837   | fs   | fs common |
| chr19 | E | 19q13.1 | 1 | 39875000 | 3642   | fs   | fs common |
| chr19 | E | 19q13.1 | 1 | 40125000 | 4712   | fs   | fs common |
| chr19 | E | 19q13.1 | 1 | 40375000 | 6212   | fs   | fs common |
| chr19 | E | 19q13.1 | 1 | 40625000 | 5069   | fs   | fs common |
| chr19 | E | 19q13.1 | 1 | 40875000 | 4916   | fs   | fs common |
| chr19 | E | 19q13.1 | 1 | 41125000 | 7913   | fs   | fs common |

|       |   |         |   |          |       |    |           |
|-------|---|---------|---|----------|-------|----|-----------|
| chr19 | E | 19q13.1 | 1 | 41375000 | 6278  | fs | fs common |
| chr19 | E | 19q13.1 | 1 | 41625000 | 6899  | fs | fs common |
| chr19 | E | 19q13.1 | 1 | 41875000 | 9747  | fs | fs common |
| chr19 | E | 19q13.1 | 1 | 42125000 | 7666  | fs | fs common |
| chr19 | E | 19q13.1 | 1 | 42375000 | 6826  | fs | fs common |
| chr19 | E | 19q13.1 | 1 | 42625000 | 7104  | fs | fs common |
| chr19 | E | 19q13.1 | 1 | 42875000 | 9980  | fs | fs common |
| chr19 | E | 19q13.1 | 1 | 43125000 | 3304  | fs | fs common |
| chr19 | E | 19q13.1 | 1 | 43375000 | 6500  | fs | fs common |
| chr19 | E | 19q13.2 | 1 | 43625000 | 5996  | fs | fs common |
| chr19 | E | 19q13.2 | 1 | 43875000 | 7678  | fs | fs common |
| chr19 | E | 19q13.2 | 1 | 44125000 | 7876  | fs | fs common |
| chr19 | E | 19q13.2 | 1 | 44375000 | 7042  | fs | fs common |
| chr19 | E | 19q13.2 | 1 | 44625000 | 4869  | fs | fs common |
| chr19 | E | 19q13.2 | 1 | 44875000 | 1407  | fs | fs common |
| chr19 | E | 19q13.2 | 1 | 45125000 | 7281  | fs | fs common |
| chr19 | E | 19q13.2 | 1 | 45375000 | 7883  | fs | fs common |
| chr19 | E | 19q13.2 | 1 | 45625000 | 7270  | fs | fs common |
| chr19 | E | 19q13.2 | 1 | 45875000 | 5652  | fs | fs common |
| chr19 | E | 19q13.2 | 1 | 46125000 | 5960  | fs | fs common |
| chr19 | E | 19q13.2 | 1 | 46375000 | 7406  | fs | fs common |
| chr19 | E | 19q13.2 | 1 | 46625000 | 30550 | fs | fs common |
| chr19 | E | 19q13.2 | 1 | 46875000 | 2992  | fs | fs common |
| chr19 | E | 19q13.2 | 1 | 47125000 | 11476 | fs | fs common |
| chr19 | E | 19q13.2 | 1 | 47375000 | 4085  | fs | fs common |
| chr19 | E | 19q13.2 | 1 | 47625000 | 3880  | fs | fs common |
| chr19 | E | 19q13.2 | 1 | 47875000 | 3465  | fs | fs common |
| chr19 | E | 19q13.2 | 1 | 48125000 | 1319  | fs | fs common |
| chr19 | E | 19q13.3 | 3 | 48375000 | 1783  | fs | fs common |
| chr19 | E | 19q13.3 | 3 | 48625000 | 8796  | fs | fs common |
| chr19 | E | 19q13.3 | 3 | 48875000 | 8163  | fs | fs common |
| chr19 | E | 19q13.3 | 3 | 49125000 | 5627  | fs | fs common |
| chr19 | E | 19q13.3 | 3 | 49375000 | 8183  | fs | fs common |
| chr19 | E | 19q13.3 | 3 | 49625000 | 8844  | fs | fs common |
| chr19 | E | 19q13.3 | 3 | 49875000 | 14109 | fs | fs common |
| chr19 | E | 19q13.3 | 3 | 50125000 | 7847  | fs | fs common |

|       |   |         |   |          |       |    |           |
|-------|---|---------|---|----------|-------|----|-----------|
| chr19 | E | 19q13.3 | 3 | 50375000 | 7223  | fs | fs common |
| chr19 | E | 19q13.3 | 3 | 50625000 | 5248  | fs | fs common |
| chr19 | E | 19q13.3 | 3 | 50875000 | 7047  | fs | fs common |
| chr19 | E | 19q13.3 | 3 | 51125000 | 4545  | fs | fs common |
| chr19 | E | 19q13.3 | 3 | 51375000 | 4940  | fs | fs common |
| chr19 | E | 19q13.3 | 3 | 51625000 | 6637  | fs | fs common |
| chr19 | E | 19q13.3 | 3 | 51875000 | 6482  | fs | fs common |
| chr19 | E | 19q13.3 | 3 | 52125000 | 6048  | fs | fs common |
| chr19 | E | 19q13.3 | 3 | 52375000 | 9447  | fs | fs common |
| chr19 | E | 19q13.3 | 3 | 52625000 | 6366  | fs | fs common |
| chr19 | E | 19q13.3 | 3 | 52875000 | 6320  | fs | fs common |
| chr19 | E | 19q13.3 | 3 | 53125000 | 9162  | fs | fs common |
| chr19 | E | 19q13.3 | 3 | 53375000 | 5028  | fs | fs common |
| chr19 | E | 19q13.3 | 3 | 53625000 | 10399 | fs | fs common |
| chr19 | E | 19q13.3 | 3 | 53875000 | 10479 | fs | fs common |
| chr19 | E | 19q13.3 | 3 | 54125000 | 10879 | fs | fs common |
| chr19 | E | 19q13.3 | 3 | 54375000 | 10694 | fs | fs common |
| chr19 | E | 19q13.3 | 3 | 54625000 | 15924 | fs | fs common |
| chr19 | E | 19q13.3 | 3 | 54875000 | 9053  | fs | fs common |
| chr19 | E | 19q13.3 | 3 | 55125000 | 3746  | fs | fs common |
| chr19 | E | 19q13.3 | 3 | 55375000 | 8532  | fs | fs common |
| chr19 | E | 19q13.3 | 3 | 55625000 | 11353 | fs | fs common |
| chr19 | E | 19q13.3 | 3 | 55875000 | 7402  | fs | fs common |
| chr19 | E | 19q13.4 | 3 | 56125000 | 13617 | fs | fs common |
| chr19 | E | 19q13.4 | 3 | 56375000 | 3808  | fs | fs common |
| chr19 | E | 19q13.4 | 3 | 56625000 | 7342  | fs | fs common |
| chr19 | E | 19q13.4 | 3 | 56875000 | 4939  | fs | fs common |
| chr19 | E | 19q13.4 | 3 | 57125000 | 6887  | fs | fs common |
| chr19 | E | 19q13.4 | 3 | 57375000 | 7362  | fs | fs common |
| chr19 | E | 19q13.4 | 3 | 57625000 | 10547 | fs | fs common |
| chr19 | E | 19q13.4 | 3 | 57875000 | 11724 | fs | fs common |
| chr19 | E | 19q13.4 | 3 | 58125000 | 10381 | fs | fs common |
| chr19 | E | 19q13.4 | 3 | 58375000 | 11992 | fs | fs common |
| chr19 | E | 19q13.4 | 3 | 58625000 | 10529 | fs | fs common |
| chr19 | E | 19q13.4 | 3 | 58875000 | 9319  | fs | fs common |
| chr19 | E | 19q13.4 | 3 | 59125000 | 15672 | fs | fs common |

|       |   |         |   |          |       |      |           |
|-------|---|---------|---|----------|-------|------|-----------|
| chr19 | E | 19q13.4 | 3 | 59375000 | 10073 | fs   | fs common |
| chr19 | E | 19q13.4 | 3 | 59625000 | 12260 | fs   | fs common |
| chr19 | E | 19q13.4 | 3 | 59875000 | 11137 | fs   | fs common |
| chr19 | E | 19q13.4 | 3 | 60125000 | 9991  | fs   | fs common |
| chr19 | E | 19q13.4 | 3 | 60375000 | 17497 | fs   | fs common |
| chr19 | T | 19q13.4 | 3 | 60625000 | 17858 | fs   | fs common |
| chr19 | T | 19q13.4 | 3 | 60875000 | 5340  | fs   | fs common |
| chr19 | T | 19q13.4 | 3 | 61125000 | 9264  | fs   | fs common |
| chr19 | T | 19q13.4 | 3 | 61375000 | 14200 | fs   | fs common |
| chr19 | T | 19q13.4 | 3 | 61625000 | 7513  | fs   | fs common |
| chr19 | T | 19q13.4 | 3 | 61875000 | 11343 | fs   | fs common |
| chr19 | T | 19q13.4 | 3 | 62125000 | 7804  | fs   | fs common |
| chr19 | T | 19q13.4 | 3 | 62375000 | 7956  | fs   | fs common |
| chr19 | T | 19q13.4 | 3 | 62625000 | 12708 | fs   | fs common |
| chr19 | T | 19q13.4 | 3 | 62875000 | 9330  | fs   | fs common |
| chr19 | T | 19q13.4 | 3 | 63125000 | 9818  | fs   | fs common |
| chr19 | T | 19q13.4 | 3 | 63375000 | 7345  | fs   | fs common |
| chr19 | T | 19q13.4 | 3 | 63625000 | 12761 | fs   | fs common |
| chr20 | T | 20p13   | 5 | 125000   | 4034  | nofs | nofs      |
| chr20 | T | 20p13   | 5 | 375000   | 2971  | nofs | nofs      |
| chr20 | T | 20p13   | 5 | 625000   | 4187  | nofs | nofs      |
| chr20 | T | 20p13   | 5 | 875000   | 3028  | nofs | nofs      |
| chr20 | T | 20p13   | 5 | 1125000  | 7559  | nofs | nofs      |
| chr20 | T | 20p13   | 5 | 1375000  | 1700  | nofs | nofs      |
| chr20 | T | 20p13   | 5 | 1625000  | 2609  | nofs | nofs      |
| chr20 | T | 20p13   | 5 | 1875000  | 3690  | nofs | nofs      |
| chr20 | T | 20p13   | 5 | 2125000  | 2567  | nofs | nofs      |
| chr20 | T | 20p13   | 5 | 2375000  | 3317  | nofs | nofs      |
| chr20 | T | 20p13   | 5 | 2625000  | 2601  | nofs | nofs      |
| chr20 | T | 20p13   | 5 | 2875000  | 6985  | nofs | nofs      |
| chr20 | T | 20p13   | 5 | 3125000  | 6164  | nofs | nofs      |
| chr20 | T | 20p13   | 5 | 3375000  | 4667  | nofs | nofs      |
| chr20 | E | 20p13   | 5 | 3625000  | 3493  | nofs | nofs      |
| chr20 | E | 20p13   | 5 | 3875000  | 4952  | nofs | nofs      |
| chr20 | E | 20p13   | 5 | 4125000  | 4292  | nofs | nofs      |
| chr20 | E | 20p13   | 5 | 4375000  | 2464  | nofs | nofs      |

|       |   |       |   |          |      |           |           |
|-------|---|-------|---|----------|------|-----------|-----------|
| chr20 | E | 20p13 | 5 | 4625000  | 2463 | nofs      | nofs      |
| chr20 | E | 20p13 | 5 | 4875000  | 4668 | nofs      | nofs      |
| chr20 | E | 20p12 | 2 | 5125000  | 2132 | nofs      | nofs      |
| chr20 | E | 20p12 | 2 | 5375000  | 2839 | nofs      | nofs      |
| chr20 | E | 20p12 | 2 | 5625000  | 4041 | nofs      | nofs      |
| chr20 | E | 20p12 | 2 | 5875000  | 2635 | nofs      | nofs      |
| chr20 | E | 20p12 | 2 | 6125000  | 3539 | nofs      | nofs      |
| chr20 | E | 20p12 | 2 | 6375000  | 2719 | nofs      | nofs      |
| chr20 | E | 20p12 | 2 | 6625000  | 2953 | nofs      | nofs      |
| chr20 | E | 20p12 | 2 | 6875000  | 1460 | nofs      | nofs      |
| chr20 | E | 20p12 | 2 | 7125000  | 2535 | nofs      | nofs      |
| chr20 | E | 20p12 | 2 | 7375000  | 2742 | nofs      | nofs      |
| chr20 | E | 20p12 | 2 | 7625000  | 2667 | nofs      | nofs      |
| chr20 | E | 20p12 | 2 | 7875000  | 2473 | nofs      | nofs      |
| chr20 | E | 20p12 | 2 | 8125000  | 2002 | nofs      | nofs      |
| chr20 | E | 20p12 | 2 | 8375000  | 2791 | nofs      | nofs      |
| chr20 | E | 20p12 | 2 | 8625000  | 3783 | nofs      | nofs      |
| chr20 | E | 20p12 | 2 | 8875000  | 2391 | fs common | fs common |
| chr20 | E | 20p12 | 2 | 9125000  | 3334 | fs common | fs common |
| chr20 | E | 20p12 | 2 | 9375000  | 2443 | fs common | fs common |
| chr20 | E | 20p12 | 2 | 9625000  | 2238 | fs common | fs common |
| chr20 | E | 20p12 | 2 | 9875000  | 3347 | fs common | fs common |
| chr20 | E | 20p12 | 2 | 10125000 | 2497 | fs common | fs common |
| chr20 | E | 20p12 | 2 | 10375000 | 2975 | fs common | fs common |
| chr20 | E | 20p12 | 2 | 10625000 | 2260 | fs common | fs common |
| chr20 | E | 20p12 | 2 | 10875000 | 3006 | fs common | fs common |
| chr20 | E | 20p12 | 2 | 11125000 | 2339 | fs common | fs common |
| chr20 | E | 20p12 | 2 | 11375000 | 2849 | fs common | fs common |
| chr20 | E | 20p12 | 2 | 11625000 | 1735 | fs common | fs common |
| chr20 | E | 20p12 | 2 | 11875000 | 2093 | fs common | fs common |
| chr20 | E | 20p12 | 2 | 12125000 | 1508 | nofs      | nofs      |
| chr20 | E | 20p12 | 2 | 12375000 | 1720 | nofs      | nofs      |
| chr20 | E | 20p12 | 2 | 12625000 | 2327 | nofs      | nofs      |
| chr20 | E | 20p12 | 2 | 12875000 | 2618 | nofs      | nofs      |
| chr20 | E | 20p12 | 2 | 13125000 | 2655 | nofs      | nofs      |
| chr20 | E | 20p12 | 2 | 13375000 | 1889 | nofs      | nofs      |

|       |   |         |   |          |      |         |         |
|-------|---|---------|---|----------|------|---------|---------|
| chr20 | E | 20p12   | 2 | 13625000 | 4570 | nofs    | nofs    |
| chr20 | E | 20p12   | 2 | 13875000 | 2764 | nofs    | nofs    |
| chr20 | E | 20p12   | 2 | 14125000 | 2247 | nofs    | nofs    |
| chr20 | E | 20p12   | 2 | 14375000 | 1390 | nofs    | nofs    |
| chr20 | E | 20p12   | 2 | 14625000 | 2295 | nofs    | nofs    |
| chr20 | E | 20p12   | 2 | 14875000 | 4165 | nofs    | nofs    |
| chr20 | E | 20p12   | 2 | 15125000 | 2792 | nofs    | nofs    |
| chr20 | E | 20p12   | 2 | 15375000 | 1858 | nofs    | nofs    |
| chr20 | E | 20p12   | 2 | 15625000 | 2765 | nofs    | nofs    |
| chr20 | E | 20p12   | 2 | 15875000 | 2029 | nofs    | nofs    |
| chr20 | E | 20p12   | 2 | 16125000 | 7276 | nofs    | nofs    |
| chr20 | E | 20p12   | 2 | 16375000 | 2018 | nofs    | nofs    |
| chr20 | E | 20p12   | 2 | 16625000 | 1620 | nofs    | nofs    |
| chr20 | E | 20p12   | 2 | 16875000 | 2366 | nofs    | nofs    |
| chr20 | E | 20p12   | 2 | 17125000 | 2914 | nofs    | nofs    |
| chr20 | E | 20p12   | 2 | 17375000 | 4184 | nofs    | nofs    |
| chr20 | E | 20p12   | 2 | 17625000 | 3630 | nofs    | nofs    |
| chr20 | E | 20p11.2 | 2 | 17875000 | 5208 | fs rare | fs rare |
| chr20 | E | 20p11.2 | 2 | 18125000 | 5612 | fs rare | fs rare |
| chr20 | E | 20p11.2 | 2 | 18375000 | 2331 | fs rare | fs rare |
| chr20 | E | 20p11.2 | 2 | 18625000 | 2990 | fs rare | fs rare |
| chr20 | E | 20p11.2 | 2 | 18875000 | 1863 | fs rare | fs rare |
| chr20 | E | 20p11.2 | 2 | 19125000 | 2608 | fs rare | fs rare |
| chr20 | E | 20p11.2 | 2 | 19375000 | 2614 | fs rare | fs rare |
| chr20 | E | 20p11.2 | 2 | 19625000 | 3786 | fs rare | fs rare |
| chr20 | E | 20p11.2 | 2 | 19875000 | 3838 | fs rare | fs rare |
| chr20 | E | 20p11.2 | 2 | 20125000 | 2640 | fs rare | fs rare |
| chr20 | E | 20p11.2 | 2 | 20375000 | 5357 | fs rare | fs rare |
| chr20 | E | 20p11.2 | 2 | 20625000 | 1879 | fs rare | fs rare |
| chr20 | E | 20p11.2 | 2 | 20875000 | 2848 | fs rare | fs rare |
| chr20 | E | 20p11.2 | 2 | 21125000 | 2947 | fs rare | fs rare |
| chr20 | E | 20p11.2 | 2 | 21375000 | 2655 | fs rare | fs rare |
| chr20 | E | 20p11.2 | 2 | 21625000 | 3223 | nofs    | nofs    |
| chr20 | E | 20p11.2 | 2 | 21875000 | 2612 | nofs    | nofs    |
| chr20 | E | 20p11.2 | 2 | 22125000 | 3582 | nofs    | nofs    |
| chr20 | E | 20p11.2 | 2 | 22375000 | 3035 | nofs    | nofs    |

|       |   |         |   |          |       |      |      |
|-------|---|---------|---|----------|-------|------|------|
| chr20 | E | 20p11.2 | 2 | 22625000 | 2937  | nofs | nofs |
| chr20 | E | 20p11.2 | 2 | 22875000 | 1959  | nofs | nofs |
| chr20 | E | 20p11.2 | 2 | 23125000 | 4760  | nofs | nofs |
| chr20 | E | 20p11.2 | 2 | 23375000 | 4019  | nofs | nofs |
| chr20 | C | 20p11.2 | 2 | 23625000 | 4118  | nofs | nofs |
| chr20 | C | 20p11.2 | 2 | 23875000 | 3387  | nofs | nofs |
| chr20 | C | 20p11.2 | 2 | 24125000 | 3429  | nofs | nofs |
| chr20 | C | 20p11.2 | 2 | 24375000 | 6939  | nofs | nofs |
| chr20 | C | 20p11.2 | 2 | 24625000 | 8444  | nofs | nofs |
| chr20 | C | 20p11.2 | 2 | 24875000 | 5760  | nofs | nofs |
| chr20 | C | 20p11.2 | 2 | 25125000 | 4323  | nofs | nofs |
| chr20 | C | 20p11.2 | 2 | 25375000 | 6617  | nofs | nofs |
| chr20 | C | 20p11.2 | 2 | 25625000 | 4935  | nofs | nofs |
| chr20 | C | 20p11.2 | 2 | 25875000 | 10987 | nofs | nofs |
| chr20 | C | 20p11.2 | 2 | 26125000 | 45676 | nofs | nofs |
| chr20 | C | 20p11.2 | 2 | 26375000 | 17569 | nofs | nofs |
| chr20 | C | 20p11.1 | . | 26625000 | 0     | nofs | nofs |
| chr20 | C | 20p11.1 | . | 26875000 | 0     | nofs | nofs |
| chr20 | C | 20p11.1 | . | 27125000 | 0     | nofs | nofs |
| chr20 | C |         | . | 27375000 | 0     | nofs | nofs |
| chr20 | C |         | . | 27625000 | 0     | nofs | nofs |
| chr20 | C |         | . | 27875000 | 0     | nofs | nofs |
| chr20 | C | 20q11.1 | . | 28125000 | 7134  | nofs | nofs |
| chr20 | C | 20q11.1 | . | 28375000 | 2309  | nofs | nofs |
| chr20 | C | 20q11.1 | . | 28625000 | 0     | nofs | nofs |
| chr20 | C | 20q11.1 | . | 28875000 | 0     | nofs | nofs |
| chr20 | C | 20q11.1 | . | 29125000 | 0     | nofs | nofs |
| chr20 | C | 20q11.2 | 2 | 29375000 | 32354 | nofs | nofs |
| chr20 | C | 20q11.2 | 2 | 29625000 | 8225  | nofs | nofs |
| chr20 | C | 20q11.2 | 2 | 29875000 | 4931  | nofs | nofs |
| chr20 | C | 20q11.2 | 2 | 30125000 | 8523  | nofs | nofs |
| chr20 | C | 20q11.2 | 2 | 30375000 | 3848  | nofs | nofs |
| chr20 | C | 20q11.2 | 2 | 30625000 | 6862  | nofs | nofs |
| chr20 | C | 20q11.2 | 2 | 30875000 | 5740  | nofs | nofs |
| chr20 | C | 20q11.2 | 2 | 31125000 | 6437  | nofs | nofs |
| chr20 | E | 20q11.2 | 2 | 31375000 | 4926  | nofs | nofs |



|       |   |         |   |          |      |      |      |
|-------|---|---------|---|----------|------|------|------|
| chr20 | E | 20q11.2 | 2 | 31625000 | 4768 | nofs | nofs |
| chr20 | E | 20q11.2 | 2 | 31875000 | 6020 | nofs | nofs |
| chr20 | E | 20q11.2 | 2 | 32125000 | 3872 | nofs | nofs |
| chr20 | E | 20q11.2 | 2 | 32375000 | 7258 | nofs | nofs |
| chr20 | E | 20q11.2 | 2 | 32625000 | 5278 | nofs | nofs |
| chr20 | E | 20q11.2 | 2 | 32875000 | 2224 | nofs | nofs |
| chr20 | E | 20q11.2 | 2 | 33125000 | 4777 | nofs | nofs |
| chr20 | E | 20q11.2 | 2 | 33375000 | 3902 | nofs | nofs |
| chr20 | E | 20q11.2 | 2 | 33625000 | 5270 | nofs | nofs |
| chr20 | E | 20q11.2 | 2 | 33875000 | 3693 | nofs | nofs |
| chr20 | E | 20q11.2 | 2 | 34125000 | 4347 | nofs | nofs |
| chr20 | E | 20q11.2 | 2 | 34375000 | 3172 | nofs | nofs |
| chr20 | E | 20q11.2 | 2 | 34625000 | 4771 | nofs | nofs |
| chr20 | E | 20q11.2 | 2 | 34875000 | 3837 | nofs | nofs |
| chr20 | E | 20q11.2 | 2 | 35125000 | 9521 | nofs | nofs |
| chr20 | E | 20q11.2 | 2 | 35375000 | 5030 | nofs | nofs |
| chr20 | E | 20q11.2 | 2 | 35625000 | 3104 | nofs | nofs |
| chr20 | E | 20q11.2 | 2 | 35875000 | 2700 | nofs | nofs |
| chr20 | E | 20q11.2 | 2 | 36125000 | 3050 | nofs | nofs |
| chr20 | E | 20q11.2 | 2 | 36375000 | 6060 | nofs | nofs |
| chr20 | E | 20q11.2 | 2 | 36625000 | 7362 | nofs | nofs |
| chr20 | E | 20q11.2 | 2 | 36875000 | 4017 | nofs | nofs |
| chr20 | E | 20q11.2 | 2 | 37125000 | 2748 | nofs | nofs |
| chr20 | B | 20q12   | . | 37375000 | 1575 | nofs | nofs |
| chr20 | B | 20q12   | . | 37625000 | 3313 | nofs | nofs |
| chr20 | B | 20q12   | . | 37875000 | 1915 | nofs | nofs |
| chr20 | B | 20q12   | . | 38125000 | 2690 | nofs | nofs |
| chr20 | B | 20q12   | . | 38375000 | 2977 | nofs | nofs |
| chr20 | B | 20q12   | . | 38625000 | 2729 | nofs | nofs |
| chr20 | B | 20q12   | . | 38875000 | 1604 | nofs | nofs |
| chr20 | B | 20q12   | . | 39125000 | 2320 | nofs | nofs |
| chr20 | B | 20q12   | . | 39375000 | 2196 | nofs | nofs |
| chr20 | B | 20q12   | . | 39625000 | 2924 | nofs | nofs |
| chr20 | B | 20q12   | . | 39875000 | 2845 | nofs | nofs |
| chr20 | B | 20q12   | . | 40125000 | 1590 | nofs | nofs |
| chr20 | B | 20q12   | . | 40375000 | 2431 | nofs | nofs |

|       |   |         |   |          |       |      |      |
|-------|---|---------|---|----------|-------|------|------|
| chr20 | B | 20q12   | . | 40625000 | 2746  | nofs | nofs |
| chr20 | B | 20q12   | . | 40875000 | 1829  | nofs | nofs |
| chr20 | E | 20q13.1 | 1 | 41125000 | 4068  | nofs | nofs |
| chr20 | E | 20q13.1 | 1 | 41375000 | 3906  | nofs | nofs |
| chr20 | E | 20q13.1 | 1 | 41625000 | 3012  | nofs | nofs |
| chr20 | E | 20q13.1 | 1 | 41875000 | 1990  | nofs | nofs |
| chr20 | E | 20q13.1 | 1 | 42125000 | 4236  | nofs | nofs |
| chr20 | E | 20q13.1 | 1 | 42375000 | 3701  | nofs | nofs |
| chr20 | E | 20q13.1 | 1 | 42625000 | 3360  | nofs | nofs |
| chr20 | E | 20q13.1 | 1 | 42875000 | 4009  | nofs | nofs |
| chr20 | E | 20q13.1 | 1 | 43125000 | 2248  | nofs | nofs |
| chr20 | E | 20q13.1 | 1 | 43375000 | 5217  | nofs | nofs |
| chr20 | E | 20q13.1 | 1 | 43625000 | 3292  | nofs | nofs |
| chr20 | E | 20q13.1 | 1 | 43875000 | 3862  | nofs | nofs |
| chr20 | E | 20q13.1 | 1 | 44125000 | 3316  | nofs | nofs |
| chr20 | E | 20q13.1 | 1 | 44375000 | 2829  | nofs | nofs |
| chr20 | E | 20q13.1 | 1 | 44625000 | 4191  | nofs | nofs |
| chr20 | E | 20q13.1 | 1 | 44875000 | 3517  | nofs | nofs |
| chr20 | E | 20q13.1 | 1 | 45125000 | 3084  | nofs | nofs |
| chr20 | E | 20q13.1 | 1 | 45375000 | 6584  | nofs | nofs |
| chr20 | E | 20q13.1 | 1 | 45625000 | 4644  | nofs | nofs |
| chr20 | E | 20q13.1 | 1 | 45875000 | 6090  | nofs | nofs |
| chr20 | E | 20q13.1 | 1 | 46125000 | 7352  | nofs | nofs |
| chr20 | E | 20q13.1 | 1 | 46375000 | 4283  | nofs | nofs |
| chr20 | E | 20q13.1 | 1 | 46625000 | 10778 | nofs | nofs |
| chr20 | E | 20q13.1 | 1 | 46875000 | 4558  | nofs | nofs |
| chr20 | E | 20q13.1 | 1 | 47125000 | 3212  | nofs | nofs |
| chr20 | E | 20q13.1 | 1 | 47375000 | 2645  | nofs | nofs |
| chr20 | E | 20q13.1 | 1 | 47625000 | 5049  | nofs | nofs |
| chr20 | E | 20q13.1 | 1 | 47875000 | 3296  | nofs | nofs |
| chr20 | E | 20q13.1 | 1 | 48125000 | 2993  | nofs | nofs |
| chr20 | E | 20q13.1 | 1 | 48375000 | 3067  | nofs | nofs |
| chr20 | E | 20q13.1 | 1 | 48625000 | 3973  | nofs | nofs |
| chr20 | E | 20q13.1 | 1 | 48875000 | 3043  | nofs | nofs |
| chr20 | E | 20q13.1 | 1 | 49125000 | 4836  | nofs | nofs |
| chr20 | E | 20q13.1 | 1 | 49375000 | 4534  | nofs | nofs |

|       |   |         |   |          |      |      |      |
|-------|---|---------|---|----------|------|------|------|
| chr20 | B | 20q13.2 | . | 49625000 | 3974 | nofs | nofs |
| chr20 | B | 20q13.2 | . | 49875000 | 4883 | nofs | nofs |
| chr20 | B | 20q13.2 | . | 50125000 | 4613 | nofs | nofs |
| chr20 | B | 20q13.2 | . | 50375000 | 4541 | nofs | nofs |
| chr20 | B | 20q13.2 | . | 50625000 | 4149 | nofs | nofs |
| chr20 | B | 20q13.2 | . | 50875000 | 3918 | nofs | nofs |
| chr20 | B | 20q13.2 | . | 51125000 | 4052 | nofs | nofs |
| chr20 | B | 20q13.2 | . | 51375000 | 3248 | nofs | nofs |
| chr20 | B | 20q13.2 | . | 51625000 | 5284 | nofs | nofs |
| chr20 | B | 20q13.2 | . | 51875000 | 6010 | nofs | nofs |
| chr20 | B | 20q13.2 | . | 52125000 | 3399 | nofs | nofs |
| chr20 | B | 20q13.2 | . | 52375000 | 2284 | nofs | nofs |
| chr20 | B | 20q13.2 | . | 52625000 | 2463 | nofs | nofs |
| chr20 | B | 20q13.2 | . | 52875000 | 1957 | nofs | nofs |
| chr20 | B | 20q13.2 | . | 53125000 | 3239 | nofs | nofs |
| chr20 | B | 20q13.2 | . | 53375000 | 2653 | nofs | nofs |
| chr20 | B | 20q13.2 | . | 53625000 | 4621 | nofs | nofs |
| chr20 | B | 20q13.3 | . | 53875000 | 4312 | nofs | nofs |
| chr20 | B | 20q13.3 | . | 54125000 | 2352 | nofs | nofs |
| chr20 | B | 20q13.3 | . | 54375000 | 4183 | nofs | nofs |
| chr20 | B | 20q13.3 | . | 54625000 | 6678 | nofs | nofs |
| chr20 | B | 20q13.3 | . | 54875000 | 5513 | nofs | nofs |
| chr20 | B | 20q13.3 | . | 55125000 | 7738 | nofs | nofs |
| chr20 | B | 20q13.3 | . | 55375000 | 3347 | nofs | nofs |
| chr20 | B | 20q13.3 | . | 55625000 | 5016 | nofs | nofs |
| chr20 | B | 20q13.3 | . | 55875000 | 6820 | nofs | nofs |
| chr20 | B | 20q13.3 | . | 56125000 | 3507 | nofs | nofs |
| chr20 | B | 20q13.3 | . | 56375000 | 4466 | nofs | nofs |
| chr20 | B | 20q13.3 | . | 56625000 | 6748 | nofs | nofs |
| chr20 | B | 20q13.3 | . | 56875000 | 4037 | nofs | nofs |
| chr20 | B | 20q13.3 | . | 57125000 | 2488 | nofs | nofs |
| chr20 | B | 20q13.3 | . | 57375000 | 7372 | nofs | nofs |
| chr20 | B | 20q13.3 | . | 57625000 | 6927 | nofs | nofs |
| chr20 | B | 20q13.3 | . | 57875000 | 3210 | nofs | nofs |
| chr20 | B | 20q13.3 | . | 58125000 | 3735 | nofs | nofs |
| chr20 | B | 20q13.3 | . | 58375000 | 4082 | nofs | nofs |

|       |   |         |   |          |       |      |      |
|-------|---|---------|---|----------|-------|------|------|
| chr20 | B | 20q13.3 | . | 58625000 | 4554  | nofs | nofs |
| chr20 | B | 20q13.3 | . | 58875000 | 7349  | nofs | nofs |
| chr20 | T | 20q13.3 | . | 59125000 | 9671  | nofs | nofs |
| chr20 | T | 20q13.3 | . | 59375000 | 17724 | nofs | nofs |
| chr20 | T | 20q13.3 | . | 59625000 | 15209 | nofs | nofs |
| chr20 | T | 20q13.3 | . | 59875000 | 27410 | nofs | nofs |
| chr20 | T | 20q13.3 | . | 60125000 | 8991  | nofs | nofs |
| chr20 | T | 20q13.3 | . | 60375000 | 14269 | nofs | nofs |
| chr20 | T | 20q13.3 | . | 60625000 | 9281  | nofs | nofs |
| chr20 | T | 20q13.3 | . | 60875000 | 12282 | nofs | nofs |
| chr20 | T | 20q13.3 | . | 61125000 | 15318 | nofs | nofs |
| chr20 | T | 20q13.3 | . | 61375000 | 18268 | nofs | nofs |
| chr20 | T | 20q13.3 | . | 61625000 | 23969 | nofs | nofs |
| chr20 | T | 20q13.3 | . | 61875000 | 18615 | nofs | nofs |
| chr20 | T | 20q13.3 | . | 62125000 | 28141 | nofs | nofs |
| chr21 | C | 21p13   | . | 125000   | 0     | nofs | nofs |
| chr21 | C | 21p13   | . | 375000   | 0     | nofs | nofs |
| chr21 | C | 21p13   | . | 625000   | 0     | nofs | nofs |
| chr21 | C | 21p13   | . | 875000   | 0     | nofs | nofs |
| chr21 | C | 21p13   | . | 1125000  | 0     | nofs | nofs |
| chr21 | C | 21p13   | . | 1375000  | 0     | nofs | nofs |
| chr21 | C | 21p13   | . | 1625000  | 0     | nofs | nofs |
| chr21 | C | 21p13   | . | 1875000  | 0     | nofs | nofs |
| chr21 | C | 21p13   | . | 2125000  | 0     | nofs | nofs |
| chr21 | C | 21p12   | . | 2375000  | 0     | nofs | nofs |
| chr21 | C | 21p12   | . | 2625000  | 0     | nofs | nofs |
| chr21 | C | 21p12   | . | 2875000  | 0     | nofs | nofs |
| chr21 | C | 21p12   | . | 3125000  | 0     | nofs | nofs |
| chr21 | C | 21p12   | . | 3375000  | 0     | nofs | nofs |
| chr21 | C | 21p12   | . | 3625000  | 0     | nofs | nofs |
| chr21 | C | 21p12   | . | 3875000  | 0     | nofs | nofs |
| chr21 | C | 21p12   | . | 4125000  | 0     | nofs | nofs |
| chr21 | C | 21p12   | . | 4375000  | 0     | nofs | nofs |
| chr21 | C | 21p12   | . | 4625000  | 0     | nofs | nofs |
| chr21 | C | 21p12   | . | 4875000  | 0     | nofs | nofs |
| chr21 | C | 21p12   | . | 5125000  | 0     | nofs | nofs |

|       |   |         |   |          |        |      |      |
|-------|---|---------|---|----------|--------|------|------|
| chr21 | C | 21p12   | . | 5375000  | 0      | nofs | nofs |
| chr21 | C | 21p12   | . | 5625000  | 0      | nofs | nofs |
| chr21 | C | 21p12   | . | 5875000  | 0      | nofs | nofs |
| chr21 | C | 21p12   | . | 6125000  | 0      | nofs | nofs |
| chr21 | C | 21p12   | . | 6375000  | 0      | nofs | nofs |
| chr21 | C | 21p11.2 | . | 6625000  | 0      | nofs | nofs |
| chr21 | C | 21p11.2 | . | 6875000  | 0      | nofs | nofs |
| chr21 | C | 21p11.2 | . | 7125000  | 0      | nofs | nofs |
| chr21 | C | 21p11.2 | . | 7375000  | 0      | nofs | nofs |
| chr21 | C | 21p11.2 | . | 7625000  | 0      | nofs | nofs |
| chr21 | C | 21p11.2 | . | 7875000  | 0      | nofs | nofs |
| chr21 | C | 21p11.2 | . | 8125000  | 0      | nofs | nofs |
| chr21 | C | 21p11.2 | . | 8375000  | 0      | nofs | nofs |
| chr21 | C | 21p11.2 | . | 8625000  | 0      | nofs | nofs |
| chr21 | C | 21p11.2 | . | 8875000  | 0      | nofs | nofs |
| chr21 | C | 21p11.2 | . | 9125000  | 0      | nofs | nofs |
| chr21 | C | 21p11.2 | . | 9375000  | 0      | nofs | nofs |
| chr21 | C | 21p11.1 | . | 9625000  | 28164  | nofs | nofs |
| chr21 | C | 21p11.1 | . | 9875000  | 121269 | nofs | nofs |
| chr21 | C | 21p11.1 | . | 10125000 | 12008  | nofs | nofs |
| chr21 | C | 21p11.1 | . | 10375000 | 0      | nofs | nofs |
| chr21 | C |         | . | 10625000 | 0      | nofs | nofs |
| chr21 | C |         | . | 10875000 | 0      | nofs | nofs |
| chr21 | C |         | . | 11125000 | 0      | nofs | nofs |
| chr21 | C |         | . | 11375000 | 0      | nofs | nofs |
| chr21 | C |         | . | 11625000 | 0      | nofs | nofs |
| chr21 | C |         | . | 11875000 | 0      | nofs | nofs |
| chr21 | C |         | . | 12125000 | 0      | nofs | nofs |
| chr21 | C |         | . | 12375000 | 0      | nofs | nofs |
| chr21 | C | 21q11.1 | . | 12625000 | 0      | nofs | nofs |
| chr21 | C | 21q11.1 | . | 12875000 | 0      | nofs | nofs |
| chr21 | C | 21q11.1 | . | 13125000 | 0      | nofs | nofs |
| chr21 | C | 21q11.1 | . | 13375000 | 0      | nofs | nofs |
| chr21 | C | 21q11.2 | 1 | 13375000 | 44824  | nofs | nofs |
| chr21 | C | 21q11.2 | 1 | 13625000 | 6272   | nofs | nofs |
| chr21 | C | 21q11.2 | 1 | 13875000 | 4187   | nofs | nofs |
| chr21 | C | 21q11.2 | 1 | 14125000 | 3428   | nofs | nofs |

|       |   |         |   |          |      |      |      |
|-------|---|---------|---|----------|------|------|------|
| chr21 | C | 21q11.2 | 1 | 14375000 | 5677 | nofs | nofs |
| chr21 | C | 21q11.2 | 1 | 14625000 | 2527 | nofs | nofs |
| chr21 | C | 21q11.2 | 1 | 14875000 | 2608 | nofs | nofs |
| chr21 | C | 21q11.2 | 1 | 15125000 | 3031 | nofs | nofs |
| chr21 | C | 21q11.2 | 1 | 15375000 | 2813 | nofs | nofs |
| chr21 | C | 21q21   | . | 15625000 | 2526 | nofs | nofs |
| chr21 | C | 21q21   | . | 15875000 | 2761 | nofs | nofs |
| chr21 | C | 21q21   | . | 16125000 | 3421 | nofs | nofs |
| chr21 | C | 21q21   | . | 16375000 | 3865 | nofs | nofs |
| chr21 | B | 21q21   | . | 16625000 | 4184 | nofs | nofs |
| chr21 | B | 21q21   | . | 16875000 | 2243 | nofs | nofs |
| chr21 | B | 21q21   | . | 17125000 | 2201 | nofs | nofs |
| chr21 | B | 21q21   | . | 17375000 | 4537 | nofs | nofs |
| chr21 | B | 21q21   | . | 17625000 | 3511 | nofs | nofs |
| chr21 | B | 21q21   | . | 17875000 | 2921 | nofs | nofs |
| chr21 | B | 21q21   | . | 18125000 | 3036 | nofs | nofs |
| chr21 | B | 21q21   | . | 18375000 | 2384 | nofs | nofs |
| chr21 | B | 21q21   | . | 18625000 | 4859 | nofs | nofs |
| chr21 | B | 21q21   | . | 18875000 | 2949 | nofs | nofs |
| chr21 | B | 21q21   | . | 19125000 | 1875 | nofs | nofs |
| chr21 | B | 21q21   | . | 19375000 | 1837 | nofs | nofs |
| chr21 | B | 21q21   | . | 19625000 | 3017 | nofs | nofs |
| chr21 | B | 21q21   | . | 19875000 | 2586 | nofs | nofs |
| chr21 | B | 21q21   | . | 20125000 | 1910 | nofs | nofs |
| chr21 | B | 21q21   | . | 20375000 | 2363 | nofs | nofs |
| chr21 | B | 21q21   | . | 20625000 | 4848 | nofs | nofs |
| chr21 | B | 21q21   | . | 20875000 | 3206 | nofs | nofs |
| chr21 | B | 21q21   | . | 21125000 | 2986 | nofs | nofs |
| chr21 | B | 21q21   | . | 21375000 | 2299 | nofs | nofs |
| chr21 | B | 21q21   | . | 21625000 | 3658 | nofs | nofs |
| chr21 | B | 21q21   | . | 21875000 | 2477 | nofs | nofs |
| chr21 | B | 21q21   | . | 22125000 | 3336 | nofs | nofs |
| chr21 | B | 21q21   | . | 22375000 | 1763 | nofs | nofs |
| chr21 | B | 21q21   | . | 22625000 | 3885 | nofs | nofs |
| chr21 | B | 21q21   | . | 22875000 | 3036 | nofs | nofs |
| chr21 | B | 21q21   | . | 23125000 | 2625 | nofs | nofs |

|       |   |         |   |          |      |      |      |
|-------|---|---------|---|----------|------|------|------|
| chr21 | B | 21q21   | . | 23375000 | 3541 | nofs | nofs |
| chr21 | B | 21q21   | . | 23625000 | 4945 | nofs | nofs |
| chr21 | B | 21q21   | . | 23875000 | 2842 | nofs | nofs |
| chr21 | B | 21q21   | . | 24125000 | 4752 | nofs | nofs |
| chr21 | B | 21q21   | . | 24375000 | 2351 | nofs | nofs |
| chr21 | B | 21q21   | . | 24625000 | 3288 | nofs | nofs |
| chr21 | B | 21q21   | . | 24875000 | 2734 | nofs | nofs |
| chr21 | B | 21q21   | . | 25125000 | 1946 | nofs | nofs |
| chr21 | B | 21q21   | . | 25375000 | 2459 | nofs | nofs |
| chr21 | B | 21q21   | . | 25625000 | 1817 | nofs | nofs |
| chr21 | B | 21q21   | . | 25875000 | 2916 | nofs | nofs |
| chr21 | B | 21q21   | . | 26125000 | 1540 | nofs | nofs |
| chr21 | B | 21q21   | . | 26375000 | 3079 | nofs | nofs |
| chr21 | B | 21q21   | . | 26625000 | 2203 | nofs | nofs |
| chr21 | B | 21q21   | . | 26875000 | 1963 | nofs | nofs |
| chr21 | B | 21q21   | . | 27125000 | 2700 | nofs | nofs |
| chr21 | B | 21q21   | . | 27375000 | 2863 | nofs | nofs |
| chr21 | B | 21q21   | . | 27625000 | 2181 | nofs | nofs |
| chr21 | B | 21q21   | . | 27875000 | 3721 | nofs | nofs |
| chr21 | B | 21q21   | . | 28125000 | 2518 | nofs | nofs |
| chr21 | B | 21q21   | . | 28375000 | 2703 | nofs | nofs |
| chr21 | B | 21q21   | . | 28625000 | 2727 | nofs | nofs |
| chr21 | B | 21q21   | . | 28875000 | 3492 | nofs | nofs |
| chr21 | B | 21q21   | . | 29125000 | 4458 | nofs | nofs |
| chr21 | B | 21q21   | . | 29375000 | 4584 | nofs | nofs |
| chr21 | B | 21q21   | . | 29625000 | 3319 | nofs | nofs |
| chr21 | B | 21q21   | . | 29875000 | 3350 | nofs | nofs |
| chr21 | B | 21q21   | . | 30125000 | 2951 | nofs | nofs |
| chr21 | B | 21q21   | . | 30375000 | 2586 | nofs | nofs |
| chr21 | E | 21q22.1 | 1 | 30625000 | 3367 | nofs | nofs |
| chr21 | E | 21q22.1 | 1 | 30875000 | 2707 | nofs | nofs |
| chr21 | E | 21q22.1 | 1 | 31125000 | 4322 | nofs | nofs |
| chr21 | E | 21q22.1 | 1 | 31375000 | 3851 | nofs | nofs |
| chr21 | E | 21q22.1 | 1 | 31625000 | 2885 | nofs | nofs |
| chr21 | E | 21q22.1 | 1 | 31875000 | 5674 | nofs | nofs |
| chr21 | E | 21q22.1 | 1 | 32125000 | 6523 | nofs | nofs |

|       |   |         |   |          |      |      |      |
|-------|---|---------|---|----------|------|------|------|
| chr21 | E | 21q22.1 | 1 | 32375000 | 3464 | nofs | nofs |
| chr21 | E | 21q22.1 | 1 | 32625000 | 3681 | nofs | nofs |
| chr21 | E | 21q22.1 | 1 | 32875000 | 6531 | nofs | nofs |
| chr21 | E | 21q22.1 | 1 | 33125000 | 3509 | nofs | nofs |
| chr21 | E | 21q22.1 | 1 | 33375000 | 4461 | nofs | nofs |
| chr21 | E | 21q22.1 | 1 | 33625000 | 5753 | nofs | nofs |
| chr21 | E | 21q22.1 | 1 | 33875000 | 4830 | nofs | nofs |
| chr21 | E | 21q22.1 | 1 | 34125000 | 2085 | nofs | nofs |
| chr21 | E | 21q22.1 | 1 | 34375000 | 3831 | nofs | nofs |
| chr21 | E | 21q22.1 | 1 | 34625000 | 3259 | nofs | nofs |
| chr21 | E | 21q22.1 | 1 | 34875000 | 3125 | nofs | nofs |
| chr21 | E | 21q22.1 | 1 | 35125000 | 3850 | nofs | nofs |
| chr21 | E | 21q22.1 | 1 | 35375000 | 2649 | nofs | nofs |
| chr21 | E | 21q22.1 | 1 | 35625000 | 2334 | nofs | nofs |
| chr21 | E | 21q22.1 | 1 | 35875000 | 3111 | nofs | nofs |
| chr21 | E | 21q22.1 | 1 | 36125000 | 3676 | nofs | nofs |
| chr21 | E | 21q22.1 | 1 | 36375000 | 7418 | nofs | nofs |
| chr21 | E | 21q22.1 | 1 | 36625000 | 5016 | nofs | nofs |
| chr21 | E | 21q22.1 | 1 | 36875000 | 4882 | nofs | nofs |
| chr21 | E | 21q22.1 | 1 | 37125000 | 2214 | nofs | nofs |
| chr21 | E | 21q22.1 | 1 | 37375000 | 2896 | nofs | nofs |
| chr21 | E | 21q22.1 | 1 | 37625000 | 3103 | nofs | nofs |
| chr21 | E | 21q22.1 | 1 | 37875000 | 3152 | nofs | nofs |
| chr21 | E | 21q22.1 | 1 | 38125000 | 3582 | nofs | nofs |
| chr21 | E | 21q22.1 | 1 | 38375000 | 4841 | nofs | nofs |
| chr21 | E | 21q22.1 | 1 | 38625000 | 3595 | nofs | nofs |
| chr21 | E | 21q22.1 | 1 | 38875000 | 4142 | nofs | nofs |
| chr21 | B | 21q22.2 | . | 39125000 | 3998 | nofs | nofs |
| chr21 | B | 21q22.2 | . | 39375000 | 4366 | nofs | nofs |
| chr21 | B | 21q22.2 | . | 39625000 | 3196 | nofs | nofs |
| chr21 | B | 21q22.2 | . | 39875000 | 4419 | nofs | nofs |
| chr21 | B | 21q22.2 | . | 40125000 | 4220 | nofs | nofs |
| chr21 | B | 21q22.2 | . | 40375000 | 6245 | nofs | nofs |
| chr21 | B | 21q22.2 | . | 40625000 | 5110 | nofs | nofs |
| chr21 | B | 21q22.2 | . | 40875000 | 5495 | nofs | nofs |
| chr21 | B | 21q22.2 | . | 41125000 | 2916 | nofs | nofs |



|       |   |         |   |          |       |      |      |
|-------|---|---------|---|----------|-------|------|------|
| chr21 | E | 21q22.3 | 3 | 41375000 | 6332  | nofs | nofs |
| chr21 | E | 21q22.3 | 3 | 41625000 | 3792  | nofs | nofs |
| chr21 | E | 21q22.3 | 3 | 41875000 | 7939  | nofs | nofs |
| chr21 | E | 21q22.3 | 3 | 42125000 | 9677  | nofs | nofs |
| chr21 | E | 21q22.3 | 3 | 42375000 | 10029 | nofs | nofs |
| chr21 | E | 21q22.3 | 3 | 42625000 | 12293 | nofs | nofs |
| chr21 | E | 21q22.3 | 3 | 42875000 | 14012 | nofs | nofs |
| chr21 | E | 21q22.3 | 3 | 43125000 | 10700 | nofs | nofs |
| chr21 | E | 21q22.3 | 3 | 43375000 | 7693  | nofs | nofs |
| chr21 | T | 21q22.3 | 3 | 43625000 | 15150 | nofs | nofs |
| chr21 | T | 21q22.3 | 3 | 43875000 | 9048  | nofs | nofs |
| chr21 | T | 21q22.3 | 3 | 44125000 | 10892 | nofs | nofs |
| chr21 | T | 21q22.3 | 3 | 44375000 | 11252 | nofs | nofs |
| chr21 | T | 21q22.3 | 3 | 44625000 | 19035 | nofs | nofs |
| chr21 | T | 21q22.3 | 3 | 44875000 | 11716 | nofs | nofs |
| chr21 | T | 21q22.3 | 3 | 45125000 | 14711 | nofs | nofs |
| chr21 | T | 21q22.3 | 3 | 45375000 | 8819  | nofs | nofs |
| chr21 | T | 21q22.3 | 3 | 45625000 | 20893 | nofs | nofs |
| chr21 | T | 21q22.3 | 3 | 45875000 | 19191 | nofs | nofs |
| chr21 | T | 21q22.3 | 3 | 46125000 | 21652 | nofs | nofs |
| chr21 | T | 21q22.3 | 3 | 46375000 | 23524 | nofs | nofs |
| chr21 | T | 21q22.3 | 3 | 46625000 | 15774 | nofs | nofs |
| chr22 | C | 22p13   | . | 125000   | 0     | nofs | nofs |
| chr22 | C | 22p13   | . | 375000   | 0     | nofs | nofs |
| chr22 | C | 22p13   | . | 625000   | 0     | nofs | nofs |
| chr22 | C | 22p13   | . | 875000   | 0     | nofs | nofs |
| chr22 | C | 22p13   | . | 1125000  | 0     | nofs | nofs |
| chr22 | C | 22p13   | . | 1375000  | 0     | nofs | nofs |
| chr22 | C | 22p13   | . | 1625000  | 0     | nofs | nofs |
| chr22 | C | 22p13   | . | 1875000  | 0     | nofs | nofs |
| chr22 | C | 22p13   | . | 2125000  | 0     | nofs | nofs |
| chr22 | C | 22p13   | . | 2375000  | 0     | nofs | nofs |
| chr22 | C | 22p13   | . | 2625000  | 0     | nofs | nofs |
| chr22 | C | 22p13   | . | 2875000  | 0     | nofs | nofs |
| chr22 | C | 22p13   | . | 3125000  | 0     | nofs | nofs |
| chr22 | C | 22p12   | . | 3375000  | 0     | nofs | nofs |

|       |   |       |   |          |   |      |      |
|-------|---|-------|---|----------|---|------|------|
| chr22 | C | 22p12 | . | 3625000  | 0 | nofs | nofs |
| chr22 | C | 22p12 | . | 3875000  | 0 | nofs | nofs |
| chr22 | C | 22p12 | . | 4125000  | 0 | nofs | nofs |
| chr22 | C | 22p12 | . | 4375000  | 0 | nofs | nofs |
| chr22 | C | 22p12 | . | 4625000  | 0 | nofs | nofs |
| chr22 | C | 22p12 | . | 4875000  | 0 | nofs | nofs |
| chr22 | C | 22p12 | . | 5125000  | 0 | nofs | nofs |
| chr22 | C | 22p12 | . | 5375000  | 0 | nofs | nofs |
| chr22 | C | 22p12 | . | 5625000  | 0 | nofs | nofs |
| chr22 | C | 22p12 | . | 5875000  | 0 | nofs | nofs |
| chr22 | C | 22p12 | . | 6125000  | 0 | nofs | nofs |
| chr22 | C | 22p12 | . | 6375000  | 0 | nofs | nofs |
| chr22 | C | 22p12 | . | 6625000  | 0 | nofs | nofs |
| chr22 | C | 22p11 | . | 6875000  | 0 | nofs | nofs |
| chr22 | C | 22p11 | . | 7125000  | 0 | nofs | nofs |
| chr22 | C | 22p11 | . | 7375000  | 0 | nofs | nofs |
| chr22 | C | 22p11 | . | 7625000  | 0 | nofs | nofs |
| chr22 | C | 22p11 | . | 7875000  | 0 | nofs | nofs |
| chr22 | C | 22p11 | . | 8125000  | 0 | nofs | nofs |
| chr22 | C | 22p11 | . | 8375000  | 0 | nofs | nofs |
| chr22 | C | 22p11 | . | 8625000  | 0 | nofs | nofs |
| chr22 | C | 22p11 | . | 8875000  | 0 | nofs | nofs |
| chr22 | C | 22p11 | . | 9125000  | 0 | nofs | nofs |
| chr22 | C | 22p11 | . | 9375000  | 0 | nofs | nofs |
| chr22 | C | 22p11 | . | 9625000  | 0 | nofs | nofs |
| chr22 | C | 22p11 | . | 9875000  | 0 | nofs | nofs |
| chr22 | C | 22p11 | . | 10125000 | 0 | nofs | nofs |
| chr22 | C | 22p11 | . | 10375000 | 0 | nofs | nofs |
| chr22 | C | 22p11 | . | 10625000 | 0 | nofs | nofs |
| chr22 | C | 22p11 | . | 10875000 | 0 | nofs | nofs |
| chr22 | C | 22p11 | . | 11125000 | 0 | nofs | nofs |
| chr22 | C | 22p11 | . | 11375000 | 0 | nofs | nofs |
| chr22 | C | 22p11 | . | 11625000 | 0 | nofs | nofs |
| chr22 | C | 22p11 | . | 11875000 | 0 | nofs | nofs |
| chr22 | C | 22p11 | . | 12125000 | 0 | nofs | nofs |
| chr22 | C | 22p11 | . | 12375000 | 0 | nofs | nofs |

|       |   |   |          |        |      |      |
|-------|---|---|----------|--------|------|------|
| chr22 | C | . | 12625000 | 0      | nofs | nofs |
| chr22 | C | . | 12875000 | 0      | nofs | nofs |
| chr22 | C | . | 13125000 | 0      | nofs | nofs |
| chr22 | C | . | 13375000 | 0      | nofs | nofs |
| chr22 | C | . | 13625000 | 0      | nofs | nofs |
| chr22 | C | . | 13875000 | 0      | nofs | nofs |
| chr22 | C | . | 14125000 | 0      | nofs | nofs |
| chr22 | C | . | 14375000 | 3623   | nofs | nofs |
| chr22 | C | . | 14625000 | 3969   | nofs | nofs |
| chr22 | C | . | 14875000 | 120937 | nofs | nofs |
| chr22 | C | . | 15125000 | 18402  | nofs | nofs |
| chr22 | C | . | 15375000 | 15362  | nofs | nofs |
| chr22 | C | . | 15625000 | 2445   | nofs | nofs |
| chr22 | C | . | 15875000 | 3486   | nofs | nofs |
| chr22 | C | . | 16125000 | 7048   | nofs | nofs |
| chr22 | C | 5 | 16375000 | 4249   | nofs | nofs |
| chr22 | C | 5 | 16625000 | 6573   | nofs | nofs |
| chr22 | C | 5 | 16875000 | 5186   | nofs | nofs |
| chr22 | C | 5 | 17125000 | 15225  | nofs | nofs |
| chr22 | C | 5 | 17375000 | 7133   | nofs | nofs |
| chr22 | E | 5 | 17625000 | 3073   | nofs | nofs |
| chr22 | E | 5 | 17875000 | 3901   | nofs | nofs |
| chr22 | E | 5 | 18125000 | 5451   | nofs | nofs |
| chr22 | E | 5 | 18375000 | 4999   | nofs | nofs |
| chr22 | E | 5 | 18625000 | 10851  | nofs | nofs |
| chr22 | E | 5 | 18875000 | 10665  | nofs | nofs |
| chr22 | E | 5 | 19125000 | 17067  | nofs | nofs |
| chr22 | E | 5 | 19375000 | 3635   | nofs | nofs |
| chr22 | E | 5 | 19625000 | 4761   | nofs | nofs |
| chr22 | E | 5 | 19875000 | 7713   | nofs | nofs |
| chr22 | E | 5 | 20125000 | 8909   | nofs | nofs |
| chr22 | E | 5 | 20375000 | 3349   | nofs | nofs |
| chr22 | E | 5 | 20625000 | 3389   | nofs | nofs |
| chr22 | E | 5 | 20875000 | 10413  | nofs | nofs |
| chr22 | E | 5 | 21125000 | 3145   | nofs | nofs |
| chr22 | E | 5 | 21375000 | 3268   | nofs | nofs |
| chr22 | E | 5 | 21375000 | 3268   | nofs | nofs |

|       |   |         |   |          |      |           |           |
|-------|---|---------|---|----------|------|-----------|-----------|
| chr22 | E | 22q11.2 | 5 | 21625000 | 2786 | nofs      | nofs      |
| chr22 | E | 22q11.2 | 5 | 21875000 | 2290 | nofs      | nofs      |
| chr22 | E | 22q11.2 | 5 | 22125000 | 9635 | nofs      | nofs      |
| chr22 | E | 22q11.2 | 5 | 22375000 | 6117 | nofs      | nofs      |
| chr22 | E | 22q11.2 | 5 | 22625000 | 6323 | nofs      | nofs      |
| chr22 | E | 22q11.2 | 5 | 22875000 | 2779 | nofs      | nofs      |
| chr22 | E | 22q11.2 | 5 | 23125000 | 3887 | nofs      | nofs      |
| chr22 | E | 22q11.2 | 5 | 23375000 | 3535 | nofs      | nofs      |
| chr22 | E | 22q11.2 | 5 | 23625000 | 4154 | nofs      | nofs      |
| chr22 | E | 22q11.2 | 5 | 23875000 | 5654 | nofs      | nofs      |
| chr22 | E | 22q11.2 | 5 | 24125000 | 5160 | nofs      | nofs      |
| chr22 | E | 22q11.2 | 5 | 24375000 | 2017 | nofs      | nofs      |
| chr22 | E | 22q12.1 | 3 | 24625000 | 3931 | nofs      | nofs      |
| chr22 | E | 22q12.1 | 3 | 24875000 | 4671 | nofs      | nofs      |
| chr22 | E | 22q12.1 | 3 | 25125000 | 5667 | nofs      | nofs      |
| chr22 | E | 22q12.1 | 3 | 25375000 | 6746 | nofs      | nofs      |
| chr22 | E | 22q12.1 | 3 | 25625000 | 4471 | nofs      | nofs      |
| chr22 | E | 22q12.1 | 3 | 25875000 | 4958 | nofs      | nofs      |
| chr22 | E | 22q12.1 | 3 | 26125000 | 3934 | nofs      | nofs      |
| chr22 | E | 22q12.1 | 3 | 26375000 | 5790 | nofs      | nofs      |
| chr22 | E | 22q12.1 | 3 | 26625000 | 2947 | nofs      | nofs      |
| chr22 | E | 22q12.1 | 3 | 26875000 | 2058 | nofs      | nofs      |
| chr22 | E | 22q12.1 | 3 | 27125000 | 3255 | nofs      | nofs      |
| chr22 | E | 22q12.1 | 3 | 27375000 | 4047 | nofs      | nofs      |
| chr22 | E | 22q12.1 | 3 | 27625000 | 5155 | nofs      | nofs      |
| chr22 | E | 22q12.1 | 3 | 27875000 | 4652 | nofs      | nofs      |
| chr22 | E | 22q12.2 | 5 | 28125000 | 6168 | fs common | fs common |
| chr22 | E | 22q12.2 | 5 | 28375000 | 4815 | fs common | fs common |
| chr22 | E | 22q12.2 | 5 | 28625000 | 3209 | fs common | fs common |
| chr22 | E | 22q12.2 | 5 | 28875000 | 3842 | fs common | fs common |
| chr22 | E | 22q12.2 | 5 | 29125000 | 4669 | fs common | fs common |
| chr22 | E | 22q12.2 | 5 | 29375000 | 4166 | fs common | fs common |
| chr22 | E | 22q12.2 | 5 | 29625000 | 3051 | fs common | fs common |
| chr22 | E | 22q12.2 | 5 | 29875000 | 5163 | fs common | fs common |
| chr22 | E | 22q12.2 | 5 | 30125000 | 7018 | fs common | fs common |
| chr22 | E | 22q12.2 | 5 | 30375000 | 8306 | fs common | fs common |

|       |   |         |   |          |      |      |           |
|-------|---|---------|---|----------|------|------|-----------|
| chr22 | E | 22q12.2 | 5 | 30625000 | 5629 | fs   | fs common |
| chr22 | E | 22q12.3 | 7 | 30875000 | 4713 | nofs | nofs      |
| chr22 | E | 22q12.3 | 7 | 31125000 | 5097 | nofs | nofs      |
| chr22 | E | 22q12.3 | 7 | 31375000 | 5011 | nofs | nofs      |
| chr22 | E | 22q12.3 | 7 | 31625000 | 3272 | nofs | nofs      |
| chr22 | E | 22q12.3 | 7 | 31875000 | 3904 | nofs | nofs      |
| chr22 | E | 22q12.3 | 7 | 32125000 | 2722 | nofs | nofs      |
| chr22 | E | 22q12.3 | 7 | 32375000 | 2089 | nofs | nofs      |
| chr22 | E | 22q12.3 | 7 | 32625000 | 3003 | nofs | nofs      |
| chr22 | E | 22q12.3 | 7 | 32875000 | 3153 | nofs | nofs      |
| chr22 | E | 22q12.3 | 7 | 33125000 | 5432 | nofs | nofs      |
| chr22 | E | 22q12.3 | 7 | 33375000 | 4495 | nofs | nofs      |
| chr22 | E | 22q12.3 | 7 | 33625000 | 2030 | nofs | nofs      |
| chr22 | E | 22q12.3 | 7 | 33875000 | 4640 | nofs | nofs      |
| chr22 | E | 22q12.3 | 7 | 34125000 | 8237 | nofs | nofs      |
| chr22 | E | 22q12.3 | 7 | 34375000 | 9874 | nofs | nofs      |
| chr22 | E | 22q12.3 | 7 | 34625000 | 2327 | nofs | nofs      |
| chr22 | E | 22q12.3 | 7 | 34875000 | 3860 | nofs | nofs      |
| chr22 | E | 22q12.3 | 7 | 35125000 | 3744 | nofs | nofs      |
| chr22 | E | 22q12.3 | 7 | 35375000 | 6211 | nofs | nofs      |
| chr22 | E | 22q12.3 | 7 | 35625000 | 6255 | nofs | nofs      |
| chr22 | E | 22q13.1 | 2 | 35875000 | 6717 | fs   | fs rare   |
| chr22 | E | 22q13.1 | 2 | 36125000 | 4349 | fs   | fs rare   |
| chr22 | E | 22q13.1 | 2 | 36375000 | 8731 | fs   | fs rare   |
| chr22 | E | 22q13.1 | 2 | 36625000 | 4664 | fs   | fs rare   |
| chr22 | E | 22q13.1 | 2 | 36875000 | 4752 | fs   | fs rare   |
| chr22 | E | 22q13.1 | 2 | 37125000 | 4196 | fs   | fs rare   |
| chr22 | E | 22q13.1 | 2 | 37375000 | 5125 | fs   | fs rare   |
| chr22 | E | 22q13.1 | 2 | 37625000 | 8134 | fs   | fs rare   |
| chr22 | E | 22q13.1 | 2 | 37875000 | 4481 | fs   | fs rare   |
| chr22 | E | 22q13.1 | 2 | 38125000 | 5102 | fs   | fs rare   |
| chr22 | E | 22q13.1 | 2 | 38375000 | 8070 | fs   | fs rare   |
| chr22 | E | 22q13.1 | 2 | 38625000 | 2938 | fs   | fs rare   |
| chr22 | E | 22q13.1 | 2 | 38875000 | 2690 | fs   | fs rare   |
| chr22 | E | 22q13.1 | 2 | 39125000 | 5996 | fs   | fs rare   |
| chr22 | E | 22q13.1 | 2 | 39375000 | 6831 | fs   | fs rare   |

|       |   |         |   |          |       |    |         |
|-------|---|---------|---|----------|-------|----|---------|
| chr22 | E | 22q13.2 | 2 | 39625000 | 3664  | fs | fs rare |
| chr22 | E | 22q13.2 | 2 | 39875000 | 4375  | fs | fs rare |
| chr22 | E | 22q13.2 | 2 | 40125000 | 6511  | fs | fs rare |
| chr22 | E | 22q13.2 | 2 | 40375000 | 5673  | fs | fs rare |
| chr22 | E | 22q13.2 | 2 | 40625000 | 3560  | fs | fs rare |
| chr22 | E | 22q13.2 | 2 | 40875000 | 2393  | fs | fs rare |
| chr22 | E | 22q13.2 | 2 | 41125000 | 5326  | fs | fs rare |
| chr22 | E | 22q13.2 | 2 | 41375000 | 8029  | fs | fs rare |
| chr22 | E | 22q13.2 | 2 | 41625000 | 6217  | fs | fs rare |
| chr22 | E | 22q13.2 | 2 | 41875000 | 6722  | fs | fs rare |
| chr22 | E | 22q13.2 | 2 | 42125000 | 8540  | fs | fs rare |
| chr22 | E | 22q13.2 | 2 | 42375000 | 5201  | fs | fs rare |
| chr22 | E | 22q13.2 | 2 | 42625000 | 6437  | fs | fs rare |
| chr22 | E | 22q13.3 | 1 | 42875000 | 11583 | fs | fs rare |
| chr22 | E | 22q13.3 | 1 | 43125000 | 5103  | fs | fs rare |
| chr22 | E | 22q13.3 | 1 | 43375000 | 12627 | fs | fs rare |
| chr22 | E | 22q13.3 | 1 | 43625000 | 8268  | fs | fs rare |
| chr22 | E | 22q13.3 | 1 | 43875000 | 6220  | fs | fs rare |
| chr22 | E | 22q13.3 | 1 | 44125000 | 3328  | fs | fs rare |
| chr22 | E | 22q13.3 | 1 | 44375000 | 3676  | fs | fs rare |
| chr22 | E | 22q13.3 | 1 | 44625000 | 6793  | fs | fs rare |
| chr22 | E | 22q13.3 | 1 | 44875000 | 4415  | fs | fs rare |
| chr22 | E | 22q13.3 | 1 | 45125000 | 5353  | fs | fs rare |
| chr22 | E | 22q13.3 | 1 | 45375000 | 15678 | fs | fs rare |
| chr22 | E | 22q13.3 | 1 | 45625000 | 8815  | fs | fs rare |
| chr22 | E | 22q13.3 | 1 | 45875000 | 13582 | fs | fs rare |
| chr22 | E | 22q13.3 | 1 | 46125000 | 8125  | fs | fs rare |
| chr22 | T | 22q13.3 | 1 | 46375000 | 7691  | fs | fs rare |
| chr22 | T | 22q13.3 | 1 | 46625000 | 5526  | fs | fs rare |
| chr22 | T | 22q13.3 | 1 | 46875000 | 11778 | fs | fs rare |
| chr22 | T | 22q13.3 | 1 | 47125000 | 13849 | fs | fs rare |
| chr22 | T | 22q13.3 | 1 | 47375000 | 16541 | fs | fs rare |
| chr22 | T | 22q13.3 | 1 | 47625000 | 18950 | fs | fs rare |
| chr22 | T | 22q13.3 | 1 | 47875000 | 16235 | fs | fs rare |
| chr22 | T | 22q13.3 | 1 | 48125000 | 19595 | fs | fs rare |
| chr22 | T | 22q13.3 | 1 | 48375000 | 21563 | fs | fs rare |

|       |   |         |   |          |       |    |      |
|-------|---|---------|---|----------|-------|----|------|
| chr22 | T | 22q13.3 | 1 | 48625000 | 10076 | fs | rare |
| chr22 | T | 22q13.3 | 1 | 48875000 | 19055 | fs | rare |
| chr22 | T | 22q13.3 | 1 | 49125000 | 14172 | fs | rare |
| chr22 | T | 22q13.3 | 1 | 49375000 | 12929 | fs | rare |
